# Supplementary material for: A single-cell transcriptomic atlas of the lungs of patients with pulmonary tuberculosis
Source: Research Square preprint supplement (doi:10.21203/rs.3.rs-2752256/v1), 2024-03-18
Supplement: Supplementary file 1 [file 06f23280b019e13bd7835ed4.xlsx]

## Sheet: Table S2
Supplementary Table 2. The marker genes of each cell type identified in scRNA-seq.
gene	cluster	p_val	avg_log2FC	pct.1	pct.2	p_val_adj
EMP2	AT1	0	5.67281	0.965	0.107	0
AGER	AT1	0	5.33661	0.914	0.04	0
CAV1	AT1	0	5.05788	0.946	0.086	0
GPRC5A	AT1	0	4.36736	0.932	0.071	0
RTKN2	AT1	0	4.30878	0.774	0.029	0
LMO7	AT1	0	4.2948	0.935	0.09	0
KRT7	AT1	0	4.10176	0.864	0.063	0
CEACAM6	AT1	0	3.73922	0.724	0.029	0
RNASE1	AT1	0	3.6822	0.888	0.121	0
CLDN18	AT1	0	3.67628	0.777	0.02	0
KRT18	AT1	0	3.54146	0.859	0.116	0
CYP4B1	AT1	0	3.47923	0.815	0.064	0
KRT19	AT1	0	3.41205	0.862	0.1	0
CAV2	AT1	0	3.39864	0.848	0.053	0
AQP4	AT1	0	3.30241	0.776	0.032	0
TACSTD2	AT1	0	3.2516	0.839	0.095	0
TSPAN13	AT1	0	3.24262	0.821	0.069	0
ANKRD1	AT1	0	3.18229	0.362	0.003	0
SLC39A8	AT1	0	3.16688	0.8	0.114	0
CYR61	AT1	0	3.15515	0.689	0.073	0
ANKRD29	AT1	0	3.00749	0.722	0.027	0
TIMP3	AT1	0	2.98462	0.762	0.071	0
HOPX	AT1	0	2.96556	0.903	0.326	0
RAB11FIP1	AT1	0	2.91632	0.909	0.44	0
LIMCH1	AT1	0	2.91083	0.77	0.062	0
VEGFA	AT1	0	2.91081	0.805	0.144	0
ADIRF	AT1	0	2.82881	0.75	0.093	0
MYL9	AT1	0	2.79277	0.735	0.053	0
ANXA3	AT1	0	2.7879	0.747	0.044	0
SFTPB	AT1	0	2.76127	0.541	0.171	0
SCEL	AT1	0	2.73337	0.687	0.005	0
SFTA2	AT1	0	2.71259	0.722	0.042	0
NTM	AT1	0	2.69785	0.333	0.009	0
DST	AT1	0	2.61523	0.728	0.168	0
FOLR1	AT1	0	2.61247	0.696	0.092	0
KRT8	AT1	0	2.58901	0.734	0.106	0
CADM1	AT1	0	2.58759	0.716	0.044	0
SUSD2	AT1	0	2.55931	0.666	0.025	0
CD55	AT1	0	2.54855	0.925	0.594	0
NKX2-1	AT1	0	2.54626	0.701	0.042	0
PCYOX1	AT1	0	2.50368	0.67	0.106	0
FXYD3	AT1	0	2.46344	0.769	0.106	0
ICAM1	AT1	0	2.46173	0.804	0.279	0
EPCAM	AT1	0	2.4598	0.727	0.07	0
NCKAP5	AT1	0	2.45532	0.572	0.009	0
ALCAM	AT1	0	2.45118	0.785	0.219	0
COL4A3	AT1	0	2.44453	0.623	0.008	0
SLC34A2	AT1	0	2.4292	0.645	0.077	0
DSTN	AT1	0	2.42057	0.908	0.512	0
CTGF	AT1	0	2.40167	0.46	0.081	0
ARHGEF26	AT1	0	2.38688	0.654	0.025	0
TNNC1	AT1	0	2.37555	0.592	0.012	0
FMO2	AT1	0	2.36336	0.547	0.031	0
MYO1B	AT1	0	2.36287	0.651	0.042	0
CLDN4	AT1	0	2.34539	0.637	0.096	0
C19orf33	AT1	0	2.31724	0.665	0.057	0
CD9	AT1	0	2.3128	0.89	0.351	0
SPINT2	AT1	0	2.25087	0.78	0.262	0
NDNF	AT1	0	2.24875	0.597	0.024	0
GJA1	AT1	0	2.24677	0.614	0.034	0
GAS6	AT1	0	2.24158	0.666	0.071	0
KAL1	AT1	0	2.24126	0.599	0.068	0
TNFRSF12A	AT1	0	2.23641	0.617	0.123	0
EFNA1	AT1	0	2.2354	0.625	0.052	0
ATF3	AT1	0	2.23527	0.628	0.375	0
APLP2	AT1	0	2.21519	0.878	0.444	0
COL4A4	AT1	0	2.20317	0.595	0.013	0
SPTBN1	AT1	0	2.20302	0.782	0.196	0
ERRFI1	AT1	0	2.20132	0.595	0.145	0
LAMA3	AT1	0	2.19932	0.596	0.009	0
NEDD9	AT1	0	2.19585	0.763	0.243	0
CD151	AT1	0	2.18879	0.749	0.253	0
SDC4	AT1	0	2.18776	0.685	0.227	0
WWC2	AT1	0	2.18449	0.616	0.065	0
ELF3	AT1	0	2.18194	0.6	0.106	0
DLC1	AT1	0	2.17375	0.625	0.077	0
MSLN	AT1	0	2.16963	0.505	0.022	0
NEDD4L	AT1	0	2.13572	0.63	0.062	0
F3	AT1	0	2.09154	0.505	0.064	0
PLS3	AT1	0	2.06361	0.615	0.046	0
TM4SF1	AT1	0	2.05243	0.549	0.099	0
ITGA3	AT1	0	2.05022	0.608	0.047	0
DHCR24	AT1	0	2.0167	0.625	0.117	0
CPM	AT1	0	2.01436	0.647	0.186	0
EPB41L5	AT1	0	2.0091	0.569	0.037	0
MGLL	AT1	0	2.0078	0.641	0.143	0
MLLT4	AT1	0	1.99995	0.657	0.149	0
ID1	AT1	0	1.98275	0.648	0.155	0
MS4A15	AT1	0	1.96559	0.439	0.005	0
RDX	AT1	0	1.96108	0.686	0.227	0
FLRT3	AT1	0	1.9599	0.535	0.029	0
COL12A1	AT1	0	1.9517	0.535	0.008	0
BCAM	AT1	0	1.94648	0.594	0.049	0
CLDN7	AT1	0	1.94198	0.617	0.141	0
CYBRD1	AT1	0	1.9417	0.564	0.06	0
PRSS8	AT1	0	1.93492	0.538	0.019	0
IRX2	AT1	0	1.93028	0.561	0.038	0
LAMB3	AT1	0	1.90449	0.558	0.036	0
WFS1	AT1	0	1.90059	0.532	0.034	0
ITGB6	AT1	0	1.89853	0.49	0.026	0
NAPSA	AT1	0	1.896	0.516	0.06	0
ABCA1	AT1	0	1.89012	0.533	0.088	0
MUC1	AT1	0	1.87503	0.412	0.09	0
EDN1	AT1	0	1.87353	0.423	0.044	0
HSPB1	AT1	0	1.87298	0.694	0.44	0
MAGI3	AT1	0	1.87161	0.537	0.038	0
DAPK2	AT1	0	1.86807	0.553	0.041	0
EFEMP1	AT1	0	1.86804	0.59	0.052	0
SDC1	AT1	0	1.86435	0.544	0.029	0
DENND3	AT1	0	1.85764	0.585	0.117	0
NEBL	AT1	0	1.85488	0.531	0.03	0
SEPP1	AT1	0	1.85365	0.629	0.095	0
NPNT	AT1	0	1.85081	0.519	0.021	0
PARD6B	AT1	0	1.82283	0.535	0.05	0
PTPRF	AT1	0	1.81932	0.581	0.052	0
TNS1	AT1	0	1.81408	0.556	0.063	0
TEAD1	AT1	0	1.81237	0.55	0.053	0
ATP11A	AT1	0	1.81109	0.585	0.128	0
EPS8L2	AT1	0	1.81004	0.567	0.056	0
SEMA5A	AT1	0	1.80537	0.475	0.008	0
COL8A1	AT1	0	1.80311	0.473	0.016	0
CLIC3	AT1	0	1.79569	0.705	0.204	0
TJP1	AT1	0	1.78756	0.575	0.064	0
SLC1A1	AT1	0	1.78587	0.477	0.007	0
CGN	AT1	0	1.78427	0.51	0.029	0
PLLP	AT1	0	1.77997	0.503	0.017	0
ABLIM1	AT1	0	1.77652	0.634	0.131	0
CDH1	AT1	0	1.77366	0.542	0.051	0
CST6	AT1	0	1.77213	0.468	0.034	0
PHLDB2	AT1	0	1.76986	0.486	0.034	0
MYO1C	AT1	0	1.76283	0.583	0.119	0
SFTA3	AT1	0	1.7616	0.549	0.043	0
SOX4	AT1	0	1.7594	0.546	0.183	0
GOLGA8A	AT1	0	1.75785	0.537	0.118	0
CAPN2	AT1	0	1.72044	0.729	0.33	0
SPINT1	AT1	0	1.7107	0.555	0.091	0
CXADR	AT1	0	1.71068	0.526	0.047	0
F11R	AT1	0	1.70912	0.593	0.143	0
NGFRAP1	AT1	0	1.7091	0.574	0.119	0
PTRF	AT1	0	1.70497	0.551	0.061	0
PDGFA	AT1	0	1.70393	0.487	0.027	0
MAL2	AT1	0	1.70067	0.54	0.057	0
GGTLC1	AT1	0	1.69315	0.399	0.005	0
LMO3	AT1	0	1.68792	0.449	0.042	0
UPK3B	AT1	0	1.68369	0.398	0.005	0
PEG10	AT1	0	1.68197	0.395	0.035	0
PAPSS2	AT1	0	1.67746	0.53	0.099	0
FSTL3	AT1	0	1.67112	0.491	0.022	0
C1orf198	AT1	0	1.67021	0.497	0.031	0
MRPL14	AT1	0	1.66655	0.666	0.286	0
CKB	AT1	0	1.66564	0.593	0.106	0
GPR116	AT1	0	1.66326	0.527	0.059	0
SESTD1	AT1	0	1.66236	0.528	0.122	0
CRYAB	AT1	0	1.65969	0.29	0.013	0
CCND1	AT1	0	1.65491	0.452	0.066	0
DPYSL2	AT1	0	1.64914	0.658	0.27	0
S100A10	AT1	0	1.64866	0.97	0.845	0
C4BPA	AT1	0	1.64419	0.258	0.025	0
INADL	AT1	0	1.64291	0.538	0.07	0
LDLR	AT1	0	1.63976	0.571	0.231	0
SPOCK2	AT1	0	1.6358	0.73	0.305	0
SCNN1A	AT1	0	1.63432	0.501	0.039	0
LAMC2	AT1	0	1.63416	0.41	0.024	0
SDPR	AT1	0	1.63131	0.527	0.062	0
ANXA2	AT1	0	1.61804	0.926	0.59	0
COL4A2	AT1	0	1.61586	0.474	0.027	0
PON2	AT1	0	1.61097	0.552	0.108	0
ID4	AT1	0	1.59613	0.431	0.036	0
ADRB2	AT1	0	1.59526	0.529	0.165	0
ATP1A1	AT1	0	1.5944	0.782	0.471	0
WSB1	AT1	0	1.59377	0.8	0.591	0
GPM6A	AT1	0	1.59104	0.447	0.008	0
GOLGA8B	AT1	0	1.58909	0.472	0.078	0
ATP1B1	AT1	0	1.58863	0.64	0.243	0
HBEGF	AT1	0	1.58671	0.556	0.242	0
SELENBP1	AT1	0	1.57794	0.502	0.062	0
NCOA7	AT1	0	1.5692	0.64	0.313	0
AGRN	AT1	0	1.56508	0.491	0.062	0
ID3	AT1	0	1.56067	0.496	0.18	0
CTNND1	AT1	0	1.54799	0.555	0.146	0
RRAS	AT1	0	1.54677	0.533	0.166	0
S100A6	AT1	0	1.54475	0.986	0.923	0
GALNT5	AT1	0	1.54265	0.421	0.009	0
CLIC5	AT1	0	1.53977	0.441	0.012	0
CTNNA1	AT1	0	1.53962	0.625	0.254	0
METTL7A	AT1	0	1.53814	0.549	0.14	0
RBMS3	AT1	0	1.5365	0.465	0.033	0
TMEM125	AT1	0	1.53623	0.47	0.041	0
PERP	AT1	0	1.53196	0.62	0.149	0
FARP1	AT1	0	1.52954	0.482	0.087	0
SFN	AT1	0	1.52808	0.269	0.029	0
SHROOM3	AT1	0	1.51	0.475	0.059	0
CYSTM1	AT1	0	1.50965	0.687	0.296	0
FAM105A	AT1	0	1.50553	0.514	0.149	0
LGALS3BP	AT1	0	1.50487	0.652	0.236	0
VSIG2	AT1	0	1.49337	0.448	0.029	0
SLC40A1	AT1	0	1.48428	0.44	0.052	0
NAV2	AT1	0	1.47616	0.435	0.032	0
RHOBTB3	AT1	0	1.47437	0.472	0.081	0
PEBP4	AT1	0	1.46982	0.404	0.033	0
SPTSSA	AT1	0	1.4684	0.544	0.192	0
TMEM63B	AT1	0	1.46626	0.466	0.069	0
ATP13A4	AT1	0	1.46603	0.414	0.017	0
TACC2	AT1	0	1.46099	0.435	0.045	0
C1orf116	AT1	0	1.46004	0.433	0.025	0
KLF5	AT1	0	1.45757	0.48	0.081	0
CD47	AT1	0	1.4485	0.799	0.541	0
USP54	AT1	0	1.43915	0.362	0.038	0
ALDH3A2	AT1	0	1.4389	0.526	0.164	0
PPFIBP1	AT1	0	1.4285	0.439	0.049	0
EXPH5	AT1	0	1.42562	0.413	0.04	0
PARP14	AT1	0	1.42442	0.654	0.369	0
SSFA2	AT1	0	1.42123	0.505	0.156	0
MYRF	AT1	0	1.41576	0.405	0.004	0
UBL3	AT1	0	1.41129	0.619	0.316	0
PAWR	AT1	0	1.40972	0.459	0.059	0
FADS3	AT1	0	1.40949	0.453	0.099	0
PTGS2	AT1	0	1.40935	0.481	0.167	0
EGFR	AT1	0	1.40917	0.438	0.03	0
PLXNB2	AT1	0	1.40447	0.491	0.134	0
EGR1	AT1	0	1.40331	0.572	0.36	0
GGT1	AT1	0	1.40277	0.361	0.023	0
PDPN	AT1	0	1.40204	0.41	0.013	0
OCLN	AT1	0	1.40187	0.45	0.045	0
QKI	AT1	0	1.40174	0.678	0.356	0
AHR	AT1	0	1.4014	0.608	0.308	0
ZFP36L1	AT1	0	1.39682	0.828	0.637	0
SFTPD	AT1	0	1.39051	0.375	0.04	0
KLK11	AT1	0	1.38533	0.372	0.025	0
TES	AT1	0	1.38529	0.66	0.325	0
LAMA5	AT1	0	1.38092	0.415	0.026	0
FILIP1	AT1	0	1.38074	0.366	0.041	0
CYB5A	AT1	0	1.37958	0.733	0.323	0
PLEKHA1	AT1	0	1.37647	0.55	0.155	0
TTLL7	AT1	0	1.3705	0.37	0.024	0
IL18	AT1	0	1.3697	0.471	0.18	0
IGFBP7	AT1	0	1.36854	0.697	0.22	0
FERMT2	AT1	0	1.36382	0.437	0.044	0
COL4A1	AT1	0	1.36328	0.406	0.025	0
ERBB3	AT1	0	1.36234	0.424	0.037	0
LIMD1	AT1	0	1.35744	0.418	0.066	0
LLGL2	AT1	0	1.35387	0.515	0.119	0
PRKCZ	AT1	0	1.35284	0.435	0.048	0
EHD2	AT1	0	1.34889	0.408	0.024	0
NXN	AT1	0	1.34854	0.413	0.033	0
ARHGAP5	AT1	0	1.34664	0.519	0.168	0
SCAI	AT1	0	1.34555	0.396	0.043	0
TMPRSS2	AT1	0	1.34393	0.397	0.03	0
MYO6	AT1	0	1.3365	0.471	0.146	0
GSTP1	AT1	0	1.33637	0.895	0.677	0
MBIP	AT1	0	1.33412	0.461	0.119	0
AMOTL2	AT1	0	1.33035	0.382	0.024	0
HSD17B6	AT1	0	1.32952	0.335	0.018	0
ABCA8	AT1	0	1.31508	0.344	0.009	0
CFLAR	AT1	0	1.31378	0.775	0.538	0
SPRYD7	AT1	0	1.31204	0.426	0.081	0
TRAM1	AT1	0	1.30667	0.682	0.467	0
HSPG2	AT1	0	1.30551	0.448	0.043	0
RANBP17	AT1	0	1.29904	0.347	0.011	0
MAP2	AT1	0	1.29834	0.367	0.007	0
FAM129B	AT1	0	1.29643	0.431	0.089	0
CNN3	AT1	0	1.29552	0.481	0.074	0
HPCAL1	AT1	0	1.28945	0.538	0.244	0
TOR1AIP2	AT1	0	1.28314	0.541	0.216	0
TMC5	AT1	0	1.27482	0.435	0.061	0
IFI27	AT1	0	1.27168	0.664	0.233	0
PKDCC	AT1	0	1.2657	0.33	0.005	0
RASSF7	AT1	0	1.26566	0.448	0.101	0
FAM189A2	AT1	0	1.26104	0.35	0.007	0
TGFBR2	AT1	0	1.26082	0.608	0.31	0
ATOH8	AT1	0	1.25871	0.331	0.016	0
GCNT2	AT1	0	1.25867	0.372	0.05	0
CFL2	AT1	0	1.25706	0.429	0.071	0
BAIAP2	AT1	0	1.25171	0.44	0.111	0
DUOX1	AT1	0	1.25081	0.316	0.041	0
UTRN	AT1	0	1.24762	0.71	0.423	0
ITGA2	AT1	0	1.24694	0.271	0.033	0
PDZK1IP1	AT1	0	1.2422	0.348	0.021	0
DUSP1	AT1	0	1.24018	0.909	0.829	0
MYH14	AT1	0	1.23451	0.39	0.037	0
TAGLN	AT1	0	1.22992	0.258	0.103	0
CTTN	AT1	0	1.22948	0.417	0.062	0
IFT57	AT1	0	1.22341	0.569	0.234	0
AQP1	AT1	0	1.2207	0.285	0.049	0
SRCAP	AT1	0	1.21686	0.489	0.157	0
CUX1	AT1	0	1.21559	0.511	0.202	0
PDXK	AT1	0	1.21336	0.586	0.292	0
RASSF8	AT1	0	1.2128	0.386	0.069	0
SCNN1B	AT1	0	1.21125	0.361	0.019	0
PPP4R1	AT1	0	1.20855	0.458	0.137	0
PTPN21	AT1	0	1.20676	0.347	0.011	0
FNBP1L	AT1	0	1.20084	0.392	0.046	0
LPCAT1	AT1	0	1.19973	0.507	0.203	0
ERBB2	AT1	0	1.19773	0.406	0.047	0
MAGI1	AT1	0	1.19018	0.369	0.032	0
MYO9A	AT1	0	1.18723	0.44	0.13	0
GPRIN2	AT1	0	1.18537	0.335	0.005	0
LIPH	AT1	0	1.18493	0.362	0.027	0
CDKN2B	AT1	0	1.17904	0.354	0.029	0
AHNAK	AT1	0	1.17853	0.825	0.625	0
TSPAN3	AT1	0	1.17787	0.531	0.242	0
WBP5	AT1	0	1.17618	0.423	0.128	0
FZD6	AT1	0	1.17522	0.388	0.038	0
ITLN2	AT1	0	1.17418	0.287	0.001	0
TJP2	AT1	0	1.17284	0.386	0.071	0
LAMB2	AT1	0	1.17212	0.385	0.051	0
JUP	AT1	0	1.17076	0.409	0.052	0
TMOD3	AT1	0	1.16931	0.603	0.349	0
KLF6	AT1	0	1.16816	0.9	0.813	0
PTTG1IP	AT1	0	1.16493	0.581	0.316	0
MEGF9	AT1	0	1.16066	0.362	0.141	0
N4BP1	AT1	0	1.16036	0.565	0.281	0
PPA1	AT1	0	1.15556	0.632	0.369	0
GNAQ	AT1	0	1.15259	0.53	0.251	0
MPZL2	AT1	0	1.1507	0.363	0.082	0
GLS	AT1	0	1.14507	0.656	0.43	0
FOXA2	AT1	0	1.14455	0.326	0.021	0
AGR3	AT1	0	1.14217	0.423	0.098	0
SCARB2	AT1	0	1.13803	0.496	0.22	0
COBLL1	AT1	0	1.13079	0.373	0.06	0
GTF2I	AT1	0	1.12738	0.626	0.365	0
EVA1A	AT1	0	1.12631	0.347	0.014	0
DMKN	AT1	0	1.12509	0.432	0.069	0
DDR1	AT1	0	1.1248	0.384	0.04	0
PDLIM2	AT1	0	1.12209	0.48	0.226	0
PEAK1	AT1	0	1.12194	0.356	0.067	0
APP	AT1	0	1.12129	0.538	0.193	0
CGNL1	AT1	0	1.1163	0.316	0.017	0
FZD5	AT1	0	1.1143	0.348	0.034	0
NDST1	AT1	0	1.11246	0.345	0.038	0
GKN2	AT1	0	1.10822	0.289	0.011	0
SERPINH1	AT1	0	1.10734	0.363	0.103	0
ROR1	AT1	0	1.09993	0.314	0.005	0
CTSE	AT1	0	1.09992	0.255	0.013	0
NBEAL2	AT1	0	1.09957	0.393	0.113	0
ANXA4	AT1	0	1.09956	0.558	0.281	0
RBPMS	AT1	0	1.09472	0.377	0.05	0
MYO5C	AT1	0	1.09161	0.345	0.037	0
PAPSS1	AT1	0	1.08989	0.451	0.2	0
MMP28	AT1	0	1.08941	0.333	0.025	0
OTUD7B	AT1	0	1.08904	0.322	0.036	0
PVRL2	AT1	0	1.08801	0.407	0.114	0
SPARC	AT1	0	1.08664	0.435	0.119	0
PLXNA1	AT1	0	1.08199	0.334	0.037	0
ABHD2	AT1	0	1.08162	0.507	0.239	0
VEPH1	AT1	0	1.08103	0.317	0.018	0
IFITM3	AT1	0	1.07889	0.702	0.388	0
BTG3	AT1	0	1.07776	0.574	0.32	0
C9orf3	AT1	0	1.07536	0.341	0.058	0
VCL	AT1	0	1.07399	0.435	0.153	0
LEPROT	AT1	0	1.07334	0.579	0.318	0
ARAP2	AT1	0	1.07145	0.55	0.28	0
DOCK4	AT1	0	1.0697	0.352	0.074	0
CRIP2	AT1	0	1.06774	0.415	0.098	0
C5orf38	AT1	0	1.06721	0.323	0.022	0
NBEAL1	AT1	0	1.06631	0.433	0.165	0
SCD5	AT1	0	1.06501	0.337	0.026	0
LPCAT3	AT1	0	1.06247	0.392	0.116	0
TMEM245	AT1	0	1.06066	0.408	0.154	0
PLCE1	AT1	0	1.05901	0.305	0.027	0
FLNB	AT1	0	1.05875	0.402	0.094	0
P4HA2	AT1	0	1.05619	0.323	0.052	0
OSGIN2	AT1	0	1.05572	0.347	0.117	0
SH3RF1	AT1	0	1.05385	0.333	0.042	0
CAT	AT1	0	1.04347	0.509	0.276	0
BLVRB	AT1	0	1.04334	0.538	0.278	0
ATXN2	AT1	0	1.0432	0.438	0.165	0
PHACTR2	AT1	0	1.04278	0.523	0.274	0
FAM63B	AT1	0	1.04268	0.424	0.147	0
DUOXA1	AT1	0	1.04264	0.239	0.022	0
HEG1	AT1	0	1.0409	0.38	0.092	0
RAB25	AT1	0	1.04023	0.34	0.04	0
LRRC1	AT1	0	1.02744	0.308	0.02	0
ALS2CL	AT1	0	1.02661	0.288	0.01	0
SLC15A2	AT1	0	1.02437	0.318	0.021	0
FAM174B	AT1	0	1.02053	0.313	0.025	0
SEMA3E	AT1	0	1.01935	0.261	0.011	0
DSP	AT1	0	1.0176	0.309	0.048	0
PNPLA2	AT1	0	1.017	0.506	0.26	0
NUPR1	AT1	0	1.0102	0.591	0.252	0
NCKAP1	AT1	0	1.00888	0.359	0.061	0
CACNA2D2	AT1	0	1.00809	0.325	0.031	0
COBL	AT1	0	1.00631	0.307	0.029	0
ABI3BP	AT1	0	1.00473	0.289	0.022	0
TSPAN4	AT1	0	1.00236	0.395	0.143	0
NCOR2	AT1	0	0.999919	0.451	0.203	0
ACTN4	AT1	0	0.999763	0.695	0.497	0
TSPAN12	AT1	0	0.99654	0.303	0.023	0
TNS3	AT1	0	0.99338	0.354	0.13	0
SPAG9	AT1	0	0.992206	0.568	0.345	0
FGD4	AT1	0	0.988049	0.366	0.14	0
STX3	AT1	0	0.986755	0.376	0.114	0
PROS1	AT1	0	0.986247	0.343	0.101	0
TBC1D2	AT1	0	0.984042	0.319	0.075	0
ARHGAP29	AT1	0	0.980718	0.354	0.043	0
UNC13D	AT1	0	0.978785	0.348	0.107	0
MGST1	AT1	0	0.978744	0.426	0.215	0
SGCE	AT1	0	0.97808	0.321	0.024	0
ASAH1	AT1	0	0.976831	0.722	0.417	0
CCDC6	AT1	0	0.976747	0.436	0.188	0
ATHL1	AT1	0	0.972134	0.281	0.076	0
RHOBTB2	AT1	0	0.97033	0.285	0.039	0
ANO6	AT1	0	0.965782	0.372	0.125	0
DSG2	AT1	0	0.962285	0.309	0.027	0
STARD7	AT1	0	0.960489	0.482	0.252	0
ARHGAP44	AT1	0	0.956502	0.286	0.017	0
PXDC1	AT1	0	0.955581	0.334	0.091	0
ZNF704	AT1	0	0.955512	0.28	0.032	0
CCDC84	AT1	0	0.954804	0.363	0.116	0
TGFB2	AT1	0	0.95438	0.274	0.013	0
KHDRBS2	AT1	0	0.953764	0.211	0.004	0
WWC1	AT1	0	0.953413	0.273	0.029	0
SGMS2	AT1	0	0.952797	0.386	0.192	0
CD46	AT1	0	0.948984	0.648	0.439	0
SBDS	AT1	0	0.94888	0.657	0.463	0
GIPC1	AT1	0	0.948459	0.398	0.151	0
IL6R	AT1	0	0.94845	0.369	0.125	0
SULT1A1	AT1	0	0.946546	0.329	0.102	0
KIAA1598	AT1	0	0.945521	0.361	0.161	0
SYDE2	AT1	0	0.943971	0.271	0.017	0
SLC25A37	AT1	0	0.9405	0.482	0.207	0
SH2D4A	AT1	0	0.938139	0.285	0.03	0
PRDX1	AT1	0	0.937842	0.827	0.641	0
PRRG4	AT1	0	0.937768	0.333	0.078	0
NFIX	AT1	0	0.937649	0.338	0.063	0
ALDH3B1	AT1	0	0.937023	0.369	0.125	0
RIN2	AT1	0	0.934168	0.302	0.075	0
INF2	AT1	0	0.93194	0.318	0.097	0
SEPTIN10	AT1	0	0.930229	0.345	0.112	0
UXS1	AT1	0	0.927254	0.388	0.154	0
RAB32	AT1	0	0.92629	0.376	0.176	0
LAPTM4B	AT1	0	0.925513	0.309	0.051	0
RNF128	AT1	0	0.925403	0.281	0.009	0
NPEPPS	AT1	0	0.925178	0.41	0.17	0
APBB2	AT1	0	0.922918	0.289	0.035	0
SPRED1	AT1	0	0.921917	0.322	0.107	0
TMEM41B	AT1	0	0.920783	0.39	0.155	0
TACC1	AT1	0	0.919522	0.565	0.357	0
PPL	AT1	0	0.918998	0.291	0.023	0
SEPW1	AT1	0	0.917375	0.711	0.546	0
NDRG1	AT1	0	0.914249	0.452	0.202	0
NHSL1	AT1	0	0.912643	0.272	0.035	0
ANKS1A	AT1	0	0.911953	0.317	0.099	0
TMEM98	AT1	0	0.91152	0.31	0.045	0
NEXN	AT1	0	0.91082	0.24	0.032	0
PLEKHH2	AT1	0	0.909372	0.246	0.013	0
LSR	AT1	0	0.909237	0.348	0.071	0
ARHGAP21	AT1	0	0.90611	0.357	0.134	0
YBX3	AT1	0	0.905435	0.665	0.396	0
KANK2	AT1	0	0.904219	0.276	0.025	0
ABCA7	AT1	0	0.90302	0.288	0.07	0
RAB17	AT1	0	0.902469	0.263	0.017	0
CLIC2	AT1	0	0.898979	0.295	0.066	0
ZFHX3	AT1	0	0.898683	0.36	0.147	0
PTPN1	AT1	0	0.896892	0.534	0.328	0
LTBR	AT1	0	0.895515	0.326	0.118	0
HSBP1L1	AT1	0	0.895178	0.346	0.107	0
WFDC2	AT1	0	0.887348	0.548	0.16	0
LPP	AT1	0	0.887163	0.473	0.264	0
TMEM30A	AT1	0	0.885123	0.481	0.271	0
ABI2	AT1	0	0.883796	0.347	0.118	0
FBLN5	AT1	0	0.882871	0.297	0.032	0
SYNPO	AT1	0	0.882641	0.269	0.023	0
ARHGEF2	AT1	0	0.882494	0.376	0.191	0
WASL	AT1	0	0.879284	0.374	0.139	0
PPP2CB	AT1	0	0.878725	0.403	0.188	0
TANC1	AT1	0	0.878689	0.281	0.032	0
SYT15	AT1	0	0.878144	0.261	0.017	0
NFIC	AT1	0	0.8764	0.446	0.22	0
MALL	AT1	0	0.876243	0.259	0.042	0
LRRC16A	AT1	0	0.875721	0.274	0.036	0
AK1	AT1	0	0.875445	0.338	0.106	0
HDAC7	AT1	0	0.874983	0.361	0.111	0
AATK	AT1	0	0.874141	0.257	0.012	0
ASPH	AT1	0	0.870193	0.373	0.145	0
CD59	AT1	0	0.869281	0.64	0.346	0
GSE1	AT1	0	0.866847	0.363	0.125	0
PAM	AT1	0	0.865297	0.325	0.078	0
BCL2L1	AT1	0	0.86393	0.363	0.152	0
UNC13B	AT1	0	0.863595	0.258	0.034	0
DAG1	AT1	0	0.862361	0.31	0.061	0
C2orf54	AT1	0	0.86155	0.237	0.007	0
SMARCA1	AT1	0	0.85963	0.277	0.03	0
VKORC1L1	AT1	0	0.857498	0.331	0.115	0
RAB31	AT1	0	0.856973	0.446	0.235	0
DYNC1H1	AT1	0	0.856535	0.549	0.361	0
RAB3IP	AT1	0	0.855557	0.306	0.074	0
PDZD2	AT1	0	0.855408	0.256	0.013	0
DAPK1	AT1	0	0.85444	0.315	0.135	0
PARVA	AT1	0	0.853359	0.29	0.035	0
PMEPA1	AT1	0	0.853274	0.405	0.152	0
DAB2IP	AT1	0	0.85164	0.272	0.016	0
SPTAN1	AT1	0	0.849714	0.593	0.381	0
CALM2	AT1	0	0.849681	0.891	0.81	0
PRKCI	AT1	0	0.849362	0.34	0.096	0
BDNF	AT1	0	0.844355	0.22	0.001	0
SAMD4A	AT1	0	0.843145	0.254	0.053	0
SEMA6D	AT1	0	0.842941	0.228	0.004	0
CTDSPL	AT1	0	0.842051	0.286	0.047	0
CALCOCO1	AT1	0	0.840364	0.374	0.163	0
ITPKC	AT1	0	0.839753	0.227	0.063	0
RP1	AT1	0	0.837152	0.184	0.028	0
B3GNT2	AT1	0	0.836909	0.419	0.209	0
ST6GALNAC5	AT1	0	0.83672	0.239	0.001	0
NRBP2	AT1	0	0.835903	0.26	0.038	0
MYOF	AT1	0	0.835472	0.324	0.146	0
TMEM43	AT1	0	0.834334	0.383	0.154	0
MICAL2	AT1	0	0.833136	0.293	0.058	0
ZC3H14	AT1	0	0.832882	0.331	0.124	0
PPP1R13L	AT1	0	0.831975	0.249	0.021	0
CTNNBIP1	AT1	0	0.82955	0.329	0.125	0
IL17RE	AT1	0	0.829395	0.253	0.02	0
RARRES2	AT1	0	0.828205	0.266	0.042	0
OSMR	AT1	0	0.827594	0.252	0.034	0
ERGIC1	AT1	0	0.8275	0.421	0.238	0
TIMP2	AT1	0	0.826173	0.537	0.261	0
NFIB	AT1	0	0.823915	0.332	0.075	0
TPM1	AT1	0	0.823906	0.323	0.137	0
ITPR3	AT1	0	0.821773	0.304	0.057	0
RNF145	AT1	0	0.819277	0.516	0.306	0
TMCC1	AT1	0	0.817873	0.282	0.076	0
TMEM87A	AT1	0	0.816271	0.481	0.275	0
VEZT	AT1	0	0.813935	0.375	0.164	0
PLXNB1	AT1	0	0.813124	0.261	0.03	0
WEE1	AT1	0	0.813113	0.259	0.095	0
S100A16	AT1	0	0.810055	0.287	0.057	0
SHANK2	AT1	0	0.809838	0.253	0.023	0
S100A14	AT1	0	0.808723	0.256	0.04	0
SESN1	AT1	0	0.806938	0.321	0.11	0
FSTL1	AT1	0	0.805998	0.293	0.043	0
GAB1	AT1	0	0.805819	0.254	0.034	0
SLCO3A1	AT1	0	0.805266	0.402	0.198	0
SLC19A1	AT1	0	0.804313	0.243	0.048	0
YAP1	AT1	0	0.80408	0.281	0.043	0
FAM46B	AT1	0	0.803761	0.218	0.008	0
BMPR2	AT1	0	0.803286	0.374	0.158	0
VPS13A	AT1	0	0.800426	0.368	0.165	0
C14orf132	AT1	0	0.799244	0.226	0.018	0
ACADL	AT1	0	0.798743	0.22	0.01	0
GRK5	AT1	0	0.79669	0.274	0.051	0
C5orf42	AT1	0	0.79632	0.281	0.075	0
C12orf49	AT1	0	0.796202	0.318	0.122	0
MPP5	AT1	0	0.795729	0.26	0.05	0
ATP2B4	AT1	0	0.79529	0.446	0.219	0
LNX2	AT1	0	0.793559	0.265	0.038	0
TAX1BP3	AT1	0	0.793499	0.328	0.143	0
EMP1	AT1	0	0.791918	0.436	0.153	0
STOM	AT1	0	0.790038	0.615	0.429	0
SPATS2L	AT1	0	0.789455	0.42	0.23	0
CERS2	AT1	0	0.785966	0.408	0.212	0
MPRIP	AT1	0	0.784546	0.382	0.181	0
GABRE	AT1	0	0.783624	0.202	0.009	0
PTPN14	AT1	0	0.783247	0.253	0.026	0
MYL12B	AT1	0	0.781377	0.883	0.842	0
NFATC3	AT1	0	0.781046	0.427	0.214	0
EBPL	AT1	0	0.780647	0.363	0.158	0
ADAM9	AT1	0	0.775704	0.308	0.123	0
MISP	AT1	0	0.774837	0.255	0.021	0
GATA6	AT1	0	0.767077	0.252	0.027	0
CMTM4	AT1	0	0.766976	0.247	0.027	0
WWTR1	AT1	0	0.766392	0.304	0.103	0
DGCR2	AT1	0	0.764525	0.283	0.062	0
MPZL1	AT1	0	0.764044	0.303	0.103	0
TSPAN15	AT1	0	0.762103	0.253	0.06	0
LTBP4	AT1	0	0.758991	0.31	0.084	0
SBSPON	AT1	0	0.758826	0.218	0.003	0
TUBB6	AT1	0	0.757725	0.315	0.145	0
GRAMD2	AT1	0	0.752689	0.211	0.01	0
LMTK2	AT1	0	0.750231	0.25	0.043	0
AGAP3	AT1	0	0.74901	0.288	0.106	0
ESRP1	AT1	0	0.746094	0.241	0.023	0
CRB3	AT1	0	0.744739	0.244	0.025	0
GPC4	AT1	0	0.744146	0.238	0.028	0
TNKS1BP1	AT1	0	0.742359	0.25	0.032	0
HOMER1	AT1	0	0.742167	0.234	0.063	0
SUN1	AT1	0	0.740043	0.327	0.123	0
DOCK5	AT1	0	0.73865	0.278	0.086	0
LRP6	AT1	0	0.736317	0.226	0.023	0
TP53I3	AT1	0	0.736075	0.258	0.091	0
VPS13D	AT1	0	0.735277	0.311	0.12	0
LAPTM4A	AT1	0	0.732182	0.645	0.462	0
KLK10	AT1	0	0.731911	0.204	0.015	0
MYO5B	AT1	0	0.730629	0.224	0.016	0
PXDN	AT1	0	0.728815	0.219	0.014	0
ESYT3	AT1	0	0.727507	0.201	0.006	0
SULT2B1	AT1	0	0.725915	0.21	0.013	0
TMEM238	AT1	0	0.725359	0.402	0.197	0
C5orf24	AT1	0	0.72291	0.351	0.171	0
ARHGEF12	AT1	0	0.722549	0.312	0.101	0
C3orf52	AT1	0	0.722239	0.211	0.019	0
EPN2	AT1	0	0.717246	0.27	0.09	0
BMP2	AT1	0	0.71716	0.178	0.019	0
KCNT2	AT1	0	0.716795	0.165	0.002	0
GALNT18	AT1	0	0.716775	0.225	0.019	0
MYO1D	AT1	0	0.716295	0.246	0.036	0
CELSR1	AT1	0	0.715255	0.236	0.036	0
FLCN	AT1	0	0.713509	0.241	0.083	0
JADE1	AT1	0	0.710406	0.336	0.137	0
PRR15L	AT1	0	0.705464	0.213	0.016	0
PALLD	AT1	0	0.705135	0.268	0.089	0
ZC2HC1A	AT1	0	0.704945	0.279	0.109	0
REPS2	AT1	0	0.702163	0.216	0.021	0
HIP1	AT1	0	0.701876	0.265	0.085	0
POGK	AT1	0	0.701557	0.31	0.129	0
MUC15	AT1	0	0.701144	0.204	0.04	0
AKR1C1	AT1	0	0.700691	0.245	0.054	0
GNA11	AT1	0	0.70028	0.262	0.077	0
IGSF3	AT1	0	0.699526	0.209	0.012	0
PPP1R9A	AT1	0	0.698932	0.22	0.026	0
MARCHF2	AT1	0	0.698557	0.223	0.021	0
PIEZO1	AT1	0	0.696716	0.31	0.127	0
EZR	AT1	0	0.692556	0.851	0.715	0
CASZ1	AT1	0	0.689662	0.28	0.077	0
RNF144B	AT1	0	0.689203	0.334	0.153	0
COL4A5	AT1	0	0.688888	0.203	0.008	0
TMEM30B	AT1	0	0.688493	0.244	0.031	0
DDAH1	AT1	0	0.688369	0.233	0.036	0
MAP1LC3A	AT1	0	0.688145	0.363	0.158	0
ACTG1	AT1	0	0.687877	0.951	0.926	0
HOOK2	AT1	0	0.685321	0.258	0.079	0
MATN3	AT1	0	0.682118	0.179	0.001	0
SDR16C5	AT1	0	0.679178	0.196	0.034	0
GRAMD1A	AT1	0	0.678944	0.347	0.163	0
BCO2	AT1	0	0.678722	0.125	0.03	0
AQP5	AT1	0	0.677566	0.143	0.019	0
RBP1	AT1	0	0.677047	0.207	0.021	0
TINAGL1	AT1	0	0.676152	0.217	0.025	0
AP1S3	AT1	0	0.675773	0.218	0.032	0
AMOTL1	AT1	0	0.670955	0.226	0.046	0
MAOA	AT1	0	0.670117	0.244	0.046	0
TMTC2	AT1	0	0.669953	0.214	0.041	0
LEPREL1	AT1	0	0.668936	0.2	0.014	0
MECOM	AT1	0	0.668049	0.232	0.042	0
ANKRD50	AT1	0	0.667149	0.21	0.039	0
TOM1L2	AT1	0	0.665343	0.231	0.048	0
SNX22	AT1	0	0.663928	0.177	0.011	0
LIN7A	AT1	0	0.662693	0.192	0.024	0
SLC6A4	AT1	0	0.66199	0.157	0.006	0
TMC4	AT1	0	0.661809	0.24	0.049	0
FKBP9	AT1	0	0.660785	0.233	0.047	0
ADRB1	AT1	0	0.660371	0.182	0.021	0
SMAD9	AT1	0	0.658674	0.195	0.011	0
EPAS1	AT1	0	0.655756	0.443	0.192	0
WASF3	AT1	0	0.653336	0.187	0.006	0
ABCA3	AT1	0	0.652705	0.153	0.032	0
KIF1C	AT1	0	0.651707	0.228	0.08	0
ITGB1	AT1	0	0.647577	0.744	0.597	0
AJUBA	AT1	0	0.647371	0.194	0.006	0
WTIP	AT1	0	0.647041	0.199	0.012	0
TNFAIP1	AT1	0	0.646732	0.242	0.059	0
KIAA0319L	AT1	0	0.643726	0.316	0.141	0
SH2D3A	AT1	0	0.643471	0.222	0.051	0
MTURN	AT1	0	0.6433	0.25	0.086	0
TMEM139	AT1	0	0.641132	0.192	0.004	0
ARHGAP35	AT1	0	0.639269	0.273	0.097	0
KRT15	AT1	0	0.636777	0.108	0.009	0
ZFYVE9	AT1	0	0.635723	0.19	0.015	0
GNG12	AT1	0	0.635335	0.247	0.088	0
BMPR1A	AT1	0	0.631103	0.206	0.032	0
PLCXD2	AT1	0	0.630782	0.165	0.005	0
SLC7A6	AT1	0	0.630492	0.247	0.073	0
TNRC18	AT1	0	0.629913	0.288	0.122	0
PTPLA	AT1	0	0.628454	0.218	0.049	0
KANSL1L	AT1	0	0.627716	0.217	0.071	0
ARHGAP24	AT1	0	0.626539	0.237	0.083	0
GRB7	AT1	0	0.625793	0.179	0.011	0
SLC25A29	AT1	0	0.624464	0.232	0.078	0
ZDHHC9	AT1	0	0.624282	0.206	0.052	0
EVPL	AT1	0	0.623148	0.201	0.011	0
MTUS1	AT1	0	0.622112	0.261	0.075	0
ST14	AT1	0	0.620396	0.235	0.086	0
MAGED1	AT1	0	0.61921	0.241	0.068	0
PKP3	AT1	0	0.618358	0.198	0.016	0
INSR	AT1	0	0.615392	0.252	0.093	0
NDFIP2	AT1	0	0.615265	0.268	0.084	0
LATS2	AT1	0	0.614834	0.27	0.113	0
ARL13B	AT1	0	0.614812	0.249	0.096	0
CNTN6	AT1	0	0.613275	0.163	0.001	0
THSD7A	AT1	0	0.610335	0.161	0.013	0
NR2F6	AT1	0	0.607555	0.23	0.052	0
CMTM8	AT1	0	0.603763	0.264	0.075	0
TMBIM6	AT1	0	0.598214	0.836	0.773	0
FAM167A	AT1	0	0.593553	0.172	0.007	0
SLC16A5	AT1	0	0.593104	0.196	0.043	0
CAMSAP2	AT1	0	0.592673	0.219	0.081	0
AHCYL2	AT1	0	0.587	0.195	0.044	0
EDIL3	AT1	0	0.586138	0.176	0.011	0
MVB12B	AT1	0	0.584653	0.195	0.045	0
ST5	AT1	0	0.582967	0.171	0.042	0
CDC42BPA	AT1	0	0.582037	0.198	0.053	0
RAI14	AT1	0	0.581528	0.204	0.041	0
TMEM9	AT1	0	0.58058	0.238	0.088	0
RBFOX2	AT1	0	0.578322	0.212	0.034	0
CLDN3	AT1	0	0.576637	0.239	0.064	0
ANG	AT1	0	0.575827	0.195	0.05	0
LAMC1	AT1	0	0.57488	0.211	0.033	0
ICAM5	AT1	0	0.571981	0.156	0.018	0
HES4	AT1	0	0.5718	0.329	0.134	0
RAPH1	AT1	0	0.571153	0.21	0.061	0
CRY2	AT1	0	0.570963	0.215	0.076	0
SPECC1	AT1	0	0.570564	0.214	0.067	0
EXT1	AT1	0	0.56841	0.209	0.049	0
SCNN1G	AT1	0	0.568044	0.15	0.006	0
EPHA2	AT1	0	0.565489	0.172	0.043	0
HYAL1	AT1	0	0.564437	0.169	0.008	0
ACKR4	AT1	0	0.563478	0.154	0.01	0
DPY19L1	AT1	0	0.563327	0.209	0.059	0
PRODH	AT1	0	0.563218	0.182	0.021	0
DAPK3	AT1	0	0.563086	0.217	0.067	0
ARHGAP23	AT1	0	0.562518	0.182	0.018	0
KRTCAP3	AT1	0	0.562458	0.2	0.039	0
ADCY9	AT1	0	0.562096	0.198	0.043	0
WWC3	AT1	0	0.560754	0.248	0.093	0
CNKSR1	AT1	0	0.559146	0.161	0.015	0
C6orf132	AT1	0	0.558562	0.173	0.029	0
DENND2C	AT1	0	0.557676	0.131	0.022	0
DCBLD2	AT1	0	0.557581	0.198	0.034	0
KIFC3	AT1	0	0.557469	0.209	0.064	0
ST6GALNAC2	AT1	0	0.555629	0.234	0.083	0
SMURF1	AT1	0	0.552848	0.21	0.073	0
DTX4	AT1	0	0.549409	0.187	0.062	0
ARHGEF5	AT1	0	0.548991	0.192	0.063	0
DCDC2	AT1	0	0.544181	0.166	0.019	0
PLOD2	AT1	0	0.543744	0.172	0.023	0
SLC25A4	AT1	0	0.54326	0.315	0.131	0
PARD3	AT1	0	0.541594	0.173	0.025	0
PTK2	AT1	0	0.541285	0.211	0.065	0
PTPRM	AT1	0	0.541114	0.211	0.068	0
PTPRK	AT1	0	0.540994	0.194	0.039	0
YEATS2	AT1	0	0.537406	0.188	0.056	0
ACSF2	AT1	0	0.536942	0.172	0.051	0
ZC3H12C	AT1	0	0.535562	0.178	0.032	0
FAXDC2	AT1	0	0.534577	0.159	0.028	0
TRIM16	AT1	0	0.531453	0.175	0.036	0
UBTD1	AT1	0	0.530224	0.181	0.04	0
C1orf168	AT1	0	0.529578	0.145	0.021	0
LURAP1L	AT1	0	0.529052	0.155	0.018	0
GSN	AT1	0	0.527263	0.54	0.31	0
HSPB8	AT1	0	0.526069	0.152	0.012	0
ATP2C2	AT1	0	0.52353	0.157	0.024	0
SAMD12	AT1	0	0.522185	0.183	0.032	0
VSIG10	AT1	0	0.52164	0.161	0.02	0
SLC12A4	AT1	0	0.521393	0.175	0.031	0
PER3	AT1	0	0.518742	0.176	0.055	0
EPPK1	AT1	0	0.517196	0.166	0.02	0
WDR34	AT1	0	0.516793	0.198	0.06	0
LIMS2	AT1	0	0.516116	0.181	0.036	0
RGL3	AT1	0	0.515561	0.139	0.014	0
CCDC68	AT1	0	0.514394	0.164	0.018	0
CCBE1	AT1	0	0.513238	0.138	0.002	0
PHACTR3	AT1	0	0.513105	0.135	0.002	0
SOD3	AT1	0	0.512495	0.195	0.026	0
LRP5	AT1	0	0.511223	0.177	0.025	0
LRRN4	AT1	0	0.510047	0.128	0.001	0
ZNF608	AT1	0	0.509807	0.151	0.027	0
ZNF503	AT1	0	0.509366	0.183	0.056	0
ARSJ	AT1	0	0.508054	0.14	0.008	0
EPDR1	AT1	0	0.504572	0.174	0.031	0
ESRP2	AT1	0	0.504359	0.148	0.009	0
PLXNA2	AT1	0	0.50264	0.175	0.05	0
TPRN	AT1	0	0.502115	0.179	0.045	0
MGAT3	AT1	0	0.5003	0.146	0.034	0
CUEDC1	AT1	0	0.500067	0.178	0.059	0
SMAD3	AT1	0	0.499555	0.238	0.087	0
EHBP1	AT1	0	0.499417	0.198	0.061	0
MID1	AT1	0	0.499324	0.157	0.024	0
KCNS3	AT1	0	0.499185	0.157	0.011	0
NRG1	AT1	0	0.498109	0.14	0.01	0
PLS1	AT1	0	0.495577	0.176	0.028	0
FAM20A	AT1	0	0.495148	0.154	0.029	0
CNKSR3	AT1	0	0.493736	0.132	0.028	0
GPR98	AT1	0	0.490659	0.135	0.016	0
CTIF	AT1	0	0.487867	0.153	0.023	0
MPP3	AT1	0	0.487475	0.133	0.005	0
SCUBE1	AT1	0	0.486031	0.134	0.003	0
SYT17	AT1	0	0.483025	0.151	0.013	0
IRF6	AT1	0	0.482178	0.166	0.027	0
XPO4	AT1	0	0.48076	0.178	0.054	0
FAM135A	AT1	0	0.480385	0.154	0.043	0
SLC5A9	AT1	0	0.480376	0.112	0.001	0
SLC44A3	AT1	0	0.478882	0.147	0.011	0
MCU	AT1	0	0.475279	0.184	0.054	0
TMEM54	AT1	0	0.474465	0.168	0.039	0
MAGEF1	AT1	0	0.474282	0.195	0.058	0
ITGB4	AT1	0	0.473966	0.17	0.025	0
FGD6	AT1	0	0.473621	0.164	0.044	0
LRIG1	AT1	0	0.472568	0.209	0.071	0
SLC16A4	AT1	0	0.46965	0.162	0.022	0
TUFT1	AT1	0	0.466151	0.152	0.034	0
NR2F2	AT1	0	0.46551	0.197	0.051	0
FZD8	AT1	0	0.464107	0.142	0.013	0
ATP9A	AT1	0	0.463654	0.173	0.035	0
RIMKLA	AT1	0	0.462462	0.134	0.003	0
MPDZ	AT1	0	0.460025	0.155	0.032	0
C10orf67	AT1	0	0.459383	0.111	0.01	0
GPC1	AT1	0	0.459175	0.151	0.016	0
ADCY6	AT1	0	0.458259	0.144	0.012	0
GLIS2	AT1	0	0.456998	0.142	0.009	0
EPS8L1	AT1	0	0.456498	0.148	0.029	0
ABHD17C	AT1	0	0.456242	0.169	0.031	0
SYTL4	AT1	0	0.452792	0.125	0.015	0
LPIN3	AT1	0	0.448972	0.126	0.012	0
PHYHD1	AT1	0	0.448916	0.153	0.026	0
MYEF2	AT1	0	0.448692	0.159	0.045	0
SULT1A2	AT1	0	0.448506	0.131	0.006	0
NEO1	AT1	0	0.448052	0.166	0.03	0
PTPRU	AT1	0	0.447724	0.154	0.017	0
C1orf167	AT1	0	0.446792	0.125	0.004	0
CELSR2	AT1	0	0.446261	0.114	0.009	0
AP1M2	AT1	0	0.446174	0.159	0.03	0
FAM83H	AT1	0	0.44207	0.149	0.022	0
ARHGEF10	AT1	0	0.441842	0.149	0.024	0
PLA2G10	AT1	0	0.440123	0.119	0.018	0
PCLO	AT1	0	0.439231	0.128	0.016	0
GPR133	AT1	0	0.436675	0.13	0.013	0
JPH1	AT1	0	0.436598	0.132	0.008	0
PTK7	AT1	0	0.435834	0.156	0.024	0
FZD2	AT1	0	0.433375	0.123	0.006	0
LCAT	AT1	0	0.433298	0.127	0.012	0
HYAL2	AT1	0	0.432458	0.22	0.076	0
KHDRBS3	AT1	0	0.431999	0.123	0.016	0
SDC2	AT1	0	0.431622	0.204	0.07	0
CEP170B	AT1	0	0.431243	0.148	0.031	0
TRNP1	AT1	0	0.431091	0.132	0.017	0
SERTM1	AT1	0	0.430291	0.109	0.001	0
FAM109A	AT1	0	0.427592	0.134	0.026	0
SPRY2	AT1	0	0.42684	0.174	0.042	0
DIAPH3	AT1	0	0.423986	0.114	0.006	0
ZSCAN31	AT1	0	0.423688	0.11	0.011	0
KIAA1217	AT1	0	0.421825	0.152	0.033	0
SIPA1L3	AT1	0	0.421025	0.162	0.048	0
SNX21	AT1	0	0.419533	0.129	0.025	0
FAAH	AT1	0	0.416453	0.132	0.017	0
CCDC64B	AT1	0	0.416375	0.135	0.03	0
EFEMP2	AT1	0	0.41533	0.144	0.024	0
CCDC85A	AT1	0	0.415234	0.127	0.004	0
MLK4	AT1	0	0.415229	0.128	0.016	0
B3GNT1	AT1	0	0.415132	0.137	0.025	0
VWA1	AT1	0	0.412903	0.158	0.036	0
PPARGC1A	AT1	0	0.412897	0.116	0.008	0
PIP5K1B	AT1	0	0.409961	0.127	0.018	0
TRIM47	AT1	0	0.40984	0.137	0.034	0
HNF1B	AT1	0	0.408099	0.115	0.005	0
MARVELD2	AT1	0	0.406345	0.152	0.026	0
SPATA6L	AT1	0	0.405569	0.118	0.022	0
RNF43	AT1	0	0.405514	0.13	0.02	0
PBX1	AT1	0	0.405049	0.173	0.051	0
KANK1	AT1	0	0.403667	0.136	0.024	0
CFI	AT1	0	0.402528	0.144	0.033	0
PRKAB1	AT1	0	0.401508	0.167	0.051	0
BEND7	AT1	0	0.400604	0.134	0.021	0
KIAA0408	AT1	0	0.400563	0.1	0.005	0
PRDM16	AT1	0	0.40042	0.122	0.008	0
AMN	AT1	0	0.398807	0.125	0.014	0
DMD	AT1	0	0.397479	0.121	0.029	0
ECHDC3	AT1	0	0.395639	0.132	0.035	0
PRSS22	AT1	0	0.394728	0.124	0.028	0
SH3RF2	AT1	0	0.394301	0.111	0.002	0
NDN	AT1	0	0.391164	0.137	0.025	0
LONRF2	AT1	0	0.389412	0.102	0.011	0
TOM1L1	AT1	0	0.386556	0.134	0.022	0
MYO10	AT1	0	0.385727	0.136	0.031	0
STARD13	AT1	0	0.384691	0.129	0.021	0
WNT3A	AT1	0	0.38303	0.1	0.001	0
REEP1	AT1	0	0.382719	0.105	0.009	0
PLEKHH3	AT1	0	0.382453	0.121	0.018	0
NOL3	AT1	0	0.382067	0.127	0.022	0
C1orf106	AT1	0	0.381255	0.125	0.016	0
WNT7A	AT1	0	0.381029	0.111	0.002	0
SHH	AT1	0	0.380692	0.101	0.005	0
PARD3B	AT1	0	0.380463	0.114	0.014	0
PACSIN3	AT1	0	0.37816	0.123	0.009	0
SCN9A	AT1	0	0.374629	0.102	0.013	0
RHBDF1	AT1	0	0.372053	0.114	0.01	0
ZHX3	AT1	0	0.37186	0.127	0.026	0
PTPRS	AT1	0	0.371777	0.123	0.02	0
TMEM37	AT1	0	0.370337	0.12	0.015	0
THSD4	AT1	0	0.370327	0.122	0.014	0
MBOAT2	AT1	0	0.369911	0.136	0.031	0
DOK4	AT1	0	0.36905	0.122	0.013	0
MRC2	AT1	0	0.36894	0.109	0.023	0
TBC1D24	AT1	0	0.367872	0.12	0.027	0
MAP7	AT1	0	0.36538	0.135	0.034	0
B3GALNT1	AT1	0	0.362951	0.119	0.017	0
TSPAN7	AT1	0	0.36186	0.152	0.024	0
C15orf52	AT1	0	0.361407	0.102	0.013	0
PYGO1	AT1	0	0.361256	0.101	0.008	0
PVRL3	AT1	0	0.361037	0.152	0.038	0
STXBP6	AT1	0	0.358061	0.129	0.022	0
CDKL5	AT1	0	0.358049	0.114	0.018	0
BOK	AT1	0	0.358016	0.125	0.021	0
RILPL1	AT1	0	0.357218	0.117	0.02	0
SHROOM4	AT1	0	0.352294	0.123	0.018	0
ABCC6	AT1	0	0.351758	0.117	0.012	0
SLC37A3	AT1	0	0.350548	0.144	0.036	0
ZNF462	AT1	0	0.350014	0.121	0.024	0
MMP24	AT1	0	0.348278	0.103	0.003	0
TEAD3	AT1	0	0.347931	0.116	0.014	0
IRX5	AT1	0	0.347679	0.118	0.021	0
ARHGEF17	AT1	0	0.347243	0.111	0.015	0
PTPN3	AT1	0	0.347202	0.119	0.019	0
WNT5A	AT1	0	0.346859	0.107	0.013	0
TMEM246	AT1	0	0.343876	0.11	0.011	0
ARHGAP42	AT1	0	0.342932	0.118	0.024	0
CYP4X1	AT1	0	0.342801	0.118	0.027	0
SERTAD4	AT1	0	0.342767	0.101	0.016	0
CHMP4C	AT1	0	0.341061	0.128	0.029	0
VLDLR	AT1	0	0.340186	0.106	0.013	0
RNASE4	AT1	0	0.339291	0.114	0.024	0
SH3D19	AT1	0	0.337051	0.125	0.028	0
DIP2C	AT1	0	0.336442	0.108	0.021	0
RIPK4	AT1	0	0.330623	0.109	0.014	0
TPBG	AT1	0	0.328503	0.125	0.028	0
MEGF6	AT1	0	0.326799	0.115	0.016	0
PROSER2	AT1	0	0.324389	0.107	0.014	0
SLC25A23	AT1	0	0.323538	0.132	0.032	0
LZTS3	AT1	0	0.322971	0.107	0.014	0
STOX2	AT1	0	0.318871	0.103	0.015	0
SYT8	AT1	0	0.31839	0.108	0.019	0
TDRP	AT1	0	0.314042	0.108	0.021	0
TLE2	AT1	0	0.311963	0.113	0.022	0
FKBP1B	AT1	0	0.310037	0.109	0.025	0
ROBO1	AT1	0	0.306255	0.104	0.014	0
GGT7	AT1	0	0.299971	0.106	0.024	0
GSTA4	AT1	0	0.296157	0.11	0.025	0
FGFR2	AT1	0	0.294541	0.103	0.021	0
CTF1	AT1	0	0.29185	0.101	0.018	0
LAYN	AT1	0	0.291143	0.107	0.023	0
TMEM25	AT1	0	0.287852	0.101	0.017	0
TLR3	AT1	0	0.279925	0.102	0.019	0
ZBTB16	AT1	1.90807e-307	0.51989	0.239	0.089	3.53756e-303
PGRMC1	AT1	8.67221e-307	0.728304	0.399	0.213	1.60783e-302
RCAN1	AT1	8.90775e-307	0.969309	0.331	0.155	1.6515e-302
hsa-mir-1199	AT1	1.0913e-306	0.318598	0.112	0.026	2.02328e-302
SHB	AT1	1.67802e-306	0.37572	0.136	0.037	3.11105e-302
CHKA	AT1	2.56507e-306	0.573718	0.225	0.085	4.75565e-302
RIC3	AT1	7.38622e-306	0.514973	0.2	0.068	1.36941e-301
TAF1C	AT1	2.68532e-305	0.387432	0.142	0.04	4.97859e-301
BAIAP2L1	AT1	5.05688e-305	0.365826	0.128	0.033	9.37546e-301
LPIN2	AT1	8.66148e-304	0.794617	0.468	0.272	1.60584e-299
KIAA1522	AT1	1.70151e-303	0.388814	0.157	0.047	3.1546e-299
HOOK1	AT1	4.31558e-303	0.350381	0.139	0.038	8.00108e-299
RALGPS1	AT1	4.79947e-303	0.336386	0.113	0.027	8.89821e-299
SNX25	AT1	1.36934e-302	0.394564	0.162	0.049	2.53875e-298
MMP14	AT1	5.24809e-301	0.469445	0.179	0.06	9.72996e-297
CRK	AT1	8.01014e-301	0.750257	0.385	0.206	1.48508e-296
RAPGEF2	AT1	2.48174e-300	0.654922	0.29	0.129	4.60115e-296
TXNDC11	AT1	5.20645e-300	0.738024	0.332	0.164	9.65277e-296
SYNGR2	AT1	3.45708e-299	0.765883	0.501	0.313	6.40942e-295
STARD9	AT1	8.65291e-299	0.338572	0.109	0.026	1.60425e-294
SREBF2	AT1	1.71571e-298	0.618895	0.295	0.131	3.18093e-294
PLEKHJ1	AT1	2.14403e-297	0.741906	0.392	0.209	3.97503e-293
SGCB	AT1	3.3636e-296	0.36041	0.146	0.042	6.23611e-292
RAB5B	AT1	3.79661e-293	0.625614	0.289	0.13	7.03892e-289
FOSB	AT1	6.86812e-293	1.39964	0.759	0.696	1.27335e-288
POGZ	AT1	7.35591e-293	0.754554	0.356	0.18	1.36379e-288
SLC26A2	AT1	5.6769e-292	0.557667	0.238	0.094	1.0525e-287
KIAA1328	AT1	1.13047e-291	0.443005	0.169	0.054	2.0959e-287
PIP5K1A	AT1	4.01568e-291	0.577621	0.248	0.101	7.44508e-287
PPP1R13B	AT1	7.16359e-291	0.431679	0.175	0.057	1.32813e-286
LTBP3	AT1	1.01669e-289	0.649986	0.293	0.132	1.88495e-285
SLC25A36	AT1	2.11852e-288	0.782718	0.438	0.253	3.92774e-284
IGF1R	AT1	8.80963e-288	0.451527	0.207	0.075	1.63331e-283
INTU	AT1	1.74751e-287	0.389696	0.134	0.037	3.23989e-283
SEMA4B	AT1	4.45043e-287	0.363771	0.134	0.037	8.25111e-283
TP53BP2	AT1	1.29565e-286	0.690222	0.349	0.174	2.40213e-282
SLC35A3	AT1	5.25946e-285	0.623871	0.278	0.122	9.75103e-281
KLF10	AT1	1.03481e-283	0.88805	0.461	0.277	1.91854e-279
FCHO2	AT1	4.81364e-283	0.70425	0.299	0.143	8.92448e-279
USP40	AT1	7.87201e-283	0.496637	0.184	0.065	1.45947e-278
CACFD1	AT1	3.81378e-282	0.279336	0.101	0.024	7.07075e-278
DVL1	AT1	6.13316e-282	0.416306	0.159	0.05	1.13709e-277
CRYZ	AT1	1.81167e-281	0.409278	0.169	0.055	3.35884e-277
DDX17	AT1	9.5494e-281	0.709747	0.758	0.656	1.77046e-276
BCL7A	AT1	7.26486e-276	0.314582	0.122	0.032	1.3469e-271
ZNF493	AT1	2.44596e-275	0.56094	0.228	0.088	4.53481e-271
NAPEPLD	AT1	1.46689e-274	0.335713	0.115	0.03	2.71962e-270
ZDHHC21	AT1	5.04755e-273	0.666379	0.251	0.108	9.35815e-269
SMPD1	AT1	5.32142e-273	0.424602	0.188	0.066	9.86592e-269
FAM198B	AT1	1.16908e-272	0.407342	0.157	0.05	2.16747e-268
NR2C1	AT1	5.53362e-272	0.493386	0.205	0.077	1.02593e-267
EVI5	AT1	8.77378e-272	0.690686	0.288	0.138	1.62666e-267
SIK2	AT1	1.38356e-270	0.661482	0.261	0.116	2.56512e-266
EDEM1	AT1	1.13472e-269	0.698122	0.34	0.174	2.10377e-265
LMNA	AT1	3.19461e-268	0.602628	0.782	0.581	5.9228e-264
WDR6	AT1	2.33023e-267	0.525122	0.262	0.112	4.32024e-263
CEBPD	AT1	2.05004e-266	0.680039	0.626	0.42	3.80077e-262
TRIP10	AT1	1.20565e-265	0.442742	0.173	0.06	2.23528e-261
SNX14	AT1	3.57845e-265	0.682087	0.327	0.167	6.63445e-261
SREBF1	AT1	4.00014e-265	0.543025	0.224	0.09	7.41626e-261
MORC4	AT1	4.74146e-265	0.335926	0.129	0.037	8.79067e-261
SLC22A23	AT1	5.39229e-265	0.315869	0.11	0.028	9.9973e-261
FAT1	AT1	5.72828e-265	0.261505	0.102	0.025	1.06202e-260
UBAP2	AT1	1.27319e-264	0.608163	0.295	0.139	2.3605e-260
CD2AP	AT1	7.1588e-264	0.646924	0.331	0.167	1.32724e-259
NET1	AT1	1.58271e-263	0.530263	0.21	0.082	2.93435e-259
CTTNBP2NL	AT1	7.70738e-259	0.59531	0.206	0.082	1.42895e-254
YOD1	AT1	5.77416e-258	0.546235	0.135	0.04	1.07053e-253
TRPM4	AT1	4.35597e-257	0.312014	0.1	0.025	8.07597e-253
SERINC2	AT1	5.70299e-257	0.525098	0.209	0.085	1.05733e-252
TAOK2	AT1	9.5267e-257	0.408342	0.177	0.062	1.76625e-252
ZDHHC7	AT1	3.90142e-256	0.569111	0.252	0.112	7.23324e-252
NHLRC2	AT1	6.69679e-256	0.418615	0.175	0.061	1.24159e-251
SYNE1	AT1	1.12489e-254	0.778347	0.504	0.293	2.08555e-250
RPS6KA2	AT1	1.32901e-254	0.464678	0.169	0.059	2.46398e-250
HEBP1	AT1	1.06867e-253	0.710583	0.313	0.163	1.98131e-249
DUSP8	AT1	1.1579e-253	0.562466	0.261	0.114	2.14675e-249
CLDN12	AT1	4.55953e-253	0.303641	0.112	0.03	8.45338e-249
AKAP9	AT1	4.69496e-253	0.735072	0.626	0.463	8.70446e-249
RASEF	AT1	4.76749e-253	0.340824	0.107	0.028	8.83892e-249
ABCA5	AT1	1.06772e-251	0.460329	0.208	0.08	1.97955e-247
CD63	AT1	4.34126e-251	0.477854	0.865	0.712	8.04869e-247
SH3YL1	AT1	1.56499e-250	0.545663	0.286	0.133	2.90149e-246
LARP4B	AT1	3.74924e-250	0.659732	0.315	0.161	6.95108e-246
KAZN	AT1	4.29319e-250	0.476131	0.161	0.056	7.95958e-246
SLC35A1	AT1	4.77621e-250	0.482611	0.197	0.076	8.8551e-246
CRLS1	AT1	8.73403e-250	0.652664	0.289	0.141	1.61929e-245
DYNC1LI2	AT1	1.37634e-249	0.71243	0.401	0.234	2.55173e-245
SERINC1	AT1	3.89926e-249	0.747542	0.58	0.428	7.22922e-245
POLR2L	AT1	8.45777e-249	0.786529	0.702	0.622	1.56807e-244
RASAL2	AT1	4.51619e-248	0.673847	0.256	0.12	8.37301e-244
ULK2	AT1	6.35093e-247	0.366956	0.14	0.044	1.17746e-242
APC	AT1	1.68995e-246	0.695874	0.325	0.169	3.13317e-242
MAFK	AT1	2.76642e-246	0.578641	0.24	0.105	5.12894e-242
HEATR5A	AT1	1.21654e-245	0.433889	0.163	0.057	2.25547e-241
ZBTB20	AT1	2.91538e-245	0.539108	0.297	0.14	5.40512e-241
FNDC3B	AT1	3.04952e-243	0.728521	0.417	0.251	5.65382e-239
IQCA1	AT1	2.39057e-242	0.315942	0.112	0.03	4.43212e-238
KLHL24	AT1	8.70001e-242	0.681731	0.384	0.214	1.61298e-237
SGMS1	AT1	8.97638e-242	0.615633	0.302	0.153	1.66422e-237
PRKAR1A	AT1	1.3786e-241	0.69168	0.592	0.438	2.55593e-237
PRDX5	AT1	4.93831e-241	0.468846	0.669	0.534	9.15562e-237
RERE	AT1	6.00857e-241	0.627858	0.352	0.186	1.11399e-236
ST3GAL5	AT1	1.00987e-240	0.590757	0.276	0.129	1.8723e-236
MBNL2	AT1	3.19472e-240	0.652623	0.348	0.184	5.92301e-236
SON	AT1	1.86516e-239	0.67154	0.787	0.727	3.45801e-235
SOWAHC	AT1	2.09085e-238	0.474738	0.175	0.066	3.87644e-234
RGS16	AT1	2.83812e-238	0.701735	0.263	0.117	5.26187e-234
FAM127B	AT1	1.06624e-237	0.514446	0.232	0.102	1.9768e-233
TRIB1	AT1	1.57688e-236	0.775431	0.357	0.198	2.92354e-232
FAM184A	AT1	5.82231e-235	0.414866	0.145	0.047	1.07946e-230
SLC39A13	AT1	8.63102e-235	0.413795	0.174	0.063	1.60019e-230
RAB14	AT1	9.88727e-235	0.739321	0.544	0.39	1.8331e-230
KLF7	AT1	1.48402e-234	0.579414	0.244	0.11	2.75138e-230
PBX2	AT1	3.4512e-234	0.49547	0.233	0.1	6.39852e-230
ZNF219	AT1	9.24205e-234	0.279327	0.114	0.033	1.71348e-229
ZNF83	AT1	3.04401e-233	0.539668	0.247	0.11	5.6436e-229
SMAD4	AT1	1.05773e-231	0.537841	0.275	0.13	1.96103e-227
ITSN1	AT1	1.90352e-231	0.424501	0.144	0.049	3.52913e-227
ADK	AT1	2.38489e-231	0.586949	0.266	0.126	4.42158e-227
PGC	AT1	3.10205e-230	0.386357	0.105	0.028	5.75119e-226
ZNF827	AT1	3.7021e-230	0.27885	0.124	0.037	6.86369e-226
REXO2	AT1	5.00234e-230	0.70663	0.41	0.251	9.27433e-226
MARCHF6	AT1	8.0339e-229	0.667015	0.442	0.273	1.48949e-224
CPEB4	AT1	8.60172e-229	0.789535	0.427	0.27	1.59476e-224
JUN	AT1	2.23027e-228	1.30202	0.826	0.761	4.13492e-224
MIB1	AT1	3.04184e-228	0.472726	0.238	0.104	5.63957e-224
VAPA	AT1	5.33646e-228	0.64888	0.694	0.563	9.89381e-224
ITPRIPL2	AT1	8.44772e-228	0.6004	0.251	0.118	1.56621e-223
IFI27L1	AT1	1.43862e-227	0.466182	0.202	0.083	2.66721e-223
DOT1L	AT1	9.91561e-227	0.605034	0.221	0.097	1.83835e-222
CHD9	AT1	1.41035e-226	0.741304	0.475	0.313	2.61478e-222
MYL6	AT1	3.46809e-226	0.429194	0.946	0.926	6.42983e-222
EPB41L4A	AT1	5.82507e-226	0.39397	0.164	0.06	1.07997e-221
GPD1L	AT1	1.05096e-225	0.306311	0.136	0.044	1.94848e-221
ACTB	AT1	3.1754e-225	0.362943	0.987	0.985	5.8872e-221
CNNM4	AT1	3.42991e-225	0.390832	0.149	0.051	6.35906e-221
CDKN1C	AT1	4.3841e-225	0.479648	0.258	0.115	8.12812e-221
PFKFB2	AT1	4.48323e-225	0.363018	0.115	0.034	8.31192e-221
DTD2	AT1	2.66612e-224	0.296607	0.107	0.03	4.94298e-220
DESI2	AT1	5.16402e-224	0.693377	0.355	0.201	9.5741e-220
MAP7D1	AT1	3.51774e-222	0.712591	0.418	0.259	6.52188e-218
NTN4	AT1	9.10786e-222	0.263637	0.112	0.032	1.6886e-217
MICA	AT1	2.07757e-221	0.37579	0.138	0.046	3.85182e-217
GGH	AT1	5.00024e-221	0.369714	0.125	0.039	9.27044e-217
RDH13	AT1	2.35378e-219	0.312144	0.126	0.039	4.36391e-215
RASD1	AT1	1.37838e-217	0.554415	0.159	0.057	2.55552e-213
TSC22D1	AT1	9.83401e-217	0.664236	0.414	0.242	1.82323e-212
PRKCDBP	AT1	1.02337e-216	0.437471	0.177	0.069	1.89733e-212
PIGQ	AT1	9.12968e-216	0.402872	0.161	0.059	1.69264e-211
PRDX6	AT1	1.37226e-215	0.6908	0.623	0.494	2.54417e-211
MMS19	AT1	1.63046e-215	0.350011	0.132	0.043	3.02287e-211
CLPTM1L	AT1	1.88311e-215	0.723361	0.382	0.232	3.49128e-211
C3orf58	AT1	3.94271e-215	0.705493	0.272	0.135	7.30979e-211
SNAP23	AT1	6.28673e-215	0.694443	0.376	0.221	1.16556e-210
ADI1	AT1	9.01417e-215	0.699697	0.41	0.257	1.67123e-210
SLC44A2	AT1	3.4723e-214	0.571224	0.332	0.178	6.43764e-210
TCEA3	AT1	9.81992e-214	0.413952	0.147	0.052	1.82061e-209
RETSAT	AT1	1.95501e-213	0.406015	0.155	0.057	3.62459e-209
TBCEL	AT1	3.87945e-213	0.296791	0.105	0.03	7.19251e-209
EGLN2	AT1	1.09377e-212	0.633553	0.361	0.209	2.02785e-208
NFAT5	AT1	3.08484e-212	0.641639	0.426	0.263	5.71929e-208
GSK3B	AT1	6.05161e-212	0.631876	0.327	0.179	1.12197e-207
SLC25A16	AT1	2.07602e-211	0.446639	0.187	0.076	3.84894e-207
MGAT4B	AT1	2.94529e-211	0.590756	0.276	0.139	5.46057e-207
CPEB2	AT1	6.49299e-211	0.509039	0.203	0.086	1.2038e-206
ADD1	AT1	1.42509e-209	0.64599	0.459	0.3	2.64213e-205
EFNB2	AT1	6.39433e-209	0.306408	0.159	0.058	1.18551e-204
TIA1	AT1	1.86992e-208	0.615977	0.31	0.164	3.46684e-204
ST3GAL4	AT1	3.09886e-207	0.338267	0.142	0.049	5.74528e-203
PCBP4	AT1	9.02148e-207	0.261881	0.108	0.031	1.67258e-202
SLC44A1	AT1	2.0031e-206	0.493037	0.253	0.121	3.71374e-202
GLCCI1	AT1	2.17819e-206	0.503951	0.278	0.132	4.03836e-202
KIAA1109	AT1	5.14861e-206	0.658799	0.404	0.246	9.54552e-202
STK3	AT1	9.4403e-206	0.49996	0.186	0.078	1.75023e-201
IFT80	AT1	1.1414e-205	0.358936	0.15	0.054	2.11615e-201
MTCH1	AT1	2.31808e-205	0.680755	0.537	0.392	4.29772e-201
GSTM3	AT1	5.25586e-204	0.468904	0.16	0.059	9.74436e-200
TMTC3	AT1	1.57136e-203	0.323323	0.14	0.049	2.91329e-199
SWAP70	AT1	3.43521e-203	0.631708	0.314	0.171	6.36889e-199
SPSB2	AT1	2.86825e-201	0.349723	0.13	0.044	5.31774e-197
IPO9	AT1	1.14938e-200	0.490157	0.22	0.099	2.13095e-196
ZDHHC16	AT1	2.78216e-200	0.33361	0.149	0.055	5.15813e-196
ABCD3	AT1	1.72365e-199	0.473448	0.227	0.105	3.19565e-195
SIK1	AT1	4.22493e-199	0.736351	0.514	0.349	7.83302e-195
MTERFD3	AT1	4.8506e-199	0.393093	0.15	0.055	8.99301e-195
BCR	AT1	6.19026e-199	0.343327	0.185	0.074	1.14767e-194
OTUD1	AT1	1.04571e-198	0.791706	0.366	0.217	1.93875e-194
IL6ST	AT1	2.46386e-198	0.495885	0.467	0.301	4.568e-194
WLS	AT1	3.15327e-198	0.455653	0.196	0.085	5.84617e-194
MMP23B	AT1	5.54178e-198	0.31579	0.13	0.043	1.02745e-193
ABCC1	AT1	1.2095e-197	0.469909	0.209	0.092	2.24242e-193
STARD10	AT1	1.9192e-197	0.437569	0.216	0.096	3.5582e-193
ITGAV	AT1	1.86427e-196	0.610478	0.254	0.127	3.45635e-192
STX2	AT1	2.84296e-195	0.550896	0.234	0.11	5.27084e-191
MROH1	AT1	4.51893e-195	0.488918	0.19	0.082	8.37809e-191
PHKB	AT1	1.35381e-194	0.591909	0.311	0.173	2.50997e-190
YWHAE	AT1	1.92919e-194	0.596887	0.625	0.498	3.57671e-190
RICTOR	AT1	3.34018e-194	0.588855	0.361	0.207	6.19269e-190
JDP2	AT1	4.61935e-194	0.61918	0.248	0.124	8.56428e-190
SLC9A3R2	AT1	9.21339e-194	0.314488	0.192	0.08	1.70816e-189
GOLGB1	AT1	1.34867e-193	0.694751	0.556	0.413	2.50044e-189
EPB41L3	AT1	2.00319e-193	0.619517	0.233	0.115	3.71391e-189
PIAS1	AT1	3.11717e-193	0.596704	0.326	0.186	5.77924e-189
INTS3	AT1	8.21131e-193	0.491488	0.188	0.08	1.52238e-188
MARK3	AT1	8.98492e-193	0.649457	0.372	0.224	1.6658e-188
SLC48A1	AT1	1.54937e-192	0.335364	0.127	0.043	2.87253e-188
SLK	AT1	2.10209e-192	0.637194	0.371	0.224	3.89727e-188
NUDT9	AT1	3.48585e-192	0.536849	0.232	0.113	6.46277e-188
HTRA1	AT1	6.56824e-192	0.284058	0.125	0.042	1.21775e-187
ENO2	AT1	1.2284e-191	0.288637	0.14	0.049	2.27746e-187
AFF4	AT1	1.51635e-191	0.663683	0.452	0.305	2.81132e-187
KCTD3	AT1	1.89152e-191	0.308931	0.105	0.032	3.50688e-187
VEZF1	AT1	5.14706e-191	0.579956	0.338	0.194	9.54265e-187
BRI3	AT1	1.21532e-190	0.412978	0.716	0.511	2.2532e-186
COMT	AT1	1.79491e-190	0.625252	0.496	0.333	3.32776e-186
PKP4	AT1	2.14008e-189	0.352898	0.134	0.047	3.96771e-185
ANKLE2	AT1	2.02015e-188	0.743865	0.378	0.234	3.74536e-184
AGTPBP1	AT1	2.02374e-188	0.578047	0.28	0.145	3.75201e-184
AK3	AT1	2.74694e-188	0.539661	0.279	0.148	5.09284e-184
NT5DC1	AT1	3.78876e-186	0.527575	0.267	0.138	7.02436e-182
PTPLAD1	AT1	4.62774e-186	0.554071	0.32	0.183	8.57983e-182
NUPL1	AT1	8.60267e-185	0.617862	0.344	0.204	1.59493e-180
NFE2L1	AT1	1.40377e-184	0.557184	0.263	0.137	2.6026e-180
DUSP3	AT1	2.07866e-184	0.59212	0.266	0.143	3.85384e-180
ICAM4	AT1	2.69828e-184	0.555732	0.167	0.069	5.00261e-180
INSIG2	AT1	1.66278e-183	0.41859	0.22	0.101	3.08279e-179
MEX3D	AT1	2.51638e-182	0.257306	0.102	0.031	4.66537e-178
PPIC	AT1	1.155e-181	0.53928	0.269	0.142	2.14138e-177
ZNF254	AT1	1.24434e-181	0.415572	0.161	0.064	2.307e-177
TSTD1	AT1	3.2422e-181	0.601181	0.511	0.351	6.01104e-177
RBMS1	AT1	1.02953e-180	0.631018	0.512	0.373	1.90874e-176
MGEA5	AT1	1.26409e-180	0.618842	0.473	0.319	2.34362e-176
ZNF579	AT1	1.62514e-180	0.286376	0.108	0.035	3.01301e-176
NUMB	AT1	5.52025e-180	0.596531	0.38	0.238	1.02345e-175
ITM2B	AT1	5.81418e-180	0.397994	0.901	0.893	1.07795e-175
HCFC1R1	AT1	1.07578e-179	0.668119	0.315	0.185	1.99449e-175
TM9SF2	AT1	1.99873e-179	0.630281	0.43	0.288	3.70565e-175
WNK1	AT1	4.01911e-179	0.75889	0.545	0.426	7.45144e-175
TRIM73	AT1	4.08402e-179	0.323258	0.123	0.042	7.57178e-175
SNX24	AT1	7.82193e-179	0.531669	0.212	0.103	1.45019e-174
ZBTB4	AT1	1.28198e-178	0.550354	0.293	0.16	2.37679e-174
FOS	AT1	1.7971e-178	0.823258	0.829	0.785	3.33183e-174
RAD21	AT1	3.03194e-178	0.642723	0.515	0.379	5.62121e-174
TKT	AT1	6.20216e-178	0.581358	0.575	0.412	1.14988e-173
FAM13A	AT1	6.94596e-178	0.537547	0.197	0.088	1.28778e-173
CSRP1	AT1	9.82935e-177	0.653309	0.339	0.206	1.82236e-172
TRIP6	AT1	1.88031e-176	0.51148	0.214	0.105	3.48609e-172
PFKFB3	AT1	1.34138e-175	0.500735	0.404	0.244	2.48692e-171
ZNF395	AT1	2.49639e-175	0.290429	0.13	0.046	4.62832e-171
EIF4G1	AT1	2.81852e-175	0.621156	0.387	0.25	5.22554e-171
ATRN	AT1	1.48808e-174	0.321822	0.135	0.05	2.7589e-170
DUSP18	AT1	3.17578e-174	0.439879	0.175	0.075	5.8879e-170
TBC1D9	AT1	7.04415e-174	0.574303	0.237	0.124	1.30599e-169
IL1R1	AT1	7.27982e-174	0.420676	0.208	0.094	1.34968e-169
VAMP8	AT1	9.49868e-174	0.592935	0.706	0.574	1.76106e-169
DAAM1	AT1	3.36111e-172	0.508578	0.266	0.139	6.23151e-168
DLG1	AT1	5.65405e-172	0.51249	0.262	0.137	1.04826e-167
APOL1	AT1	1.4349e-170	0.47647	0.208	0.099	2.6603e-166
PGM1	AT1	3.2507e-170	0.577516	0.242	0.126	6.02679e-166
PTMS	AT1	4.2607e-170	0.548348	0.526	0.362	7.89934e-166
TMEM14C	AT1	6.22854e-170	0.657064	0.455	0.319	1.15477e-165
TRAK1	AT1	1.44744e-169	0.515836	0.215	0.105	2.68355e-165
TARBP1	AT1	1.41062e-167	0.438256	0.163	0.069	2.61529e-163
FAM127A	AT1	3.95322e-167	0.509636	0.24	0.125	7.32926e-163
CHCHD6	AT1	2.9408e-166	0.386946	0.147	0.059	5.45224e-162
B3GNT7	AT1	1.16889e-165	0.519013	0.231	0.117	2.16712e-161
VGLL4	AT1	2.78333e-165	0.498373	0.295	0.164	5.1603e-161
RUFY3	AT1	5.73019e-165	0.507454	0.241	0.126	1.06238e-160
TPRG1	AT1	8.49803e-165	0.282301	0.108	0.036	1.57554e-160
NCKAP5L	AT1	1.24834e-164	0.448419	0.194	0.09	2.31442e-160
SEC31A	AT1	1.68136e-164	0.60526	0.443	0.307	3.11725e-160
ARHGEF35	AT1	1.81065e-164	0.414831	0.147	0.06	3.35694e-160
BAHD1	AT1	2.89392e-164	0.333461	0.129	0.048	5.36532e-160
FAM134B	AT1	3.91222e-164	0.58769	0.233	0.12	7.25326e-160
C11orf54	AT1	4.34997e-164	0.534155	0.243	0.128	8.06484e-160
KDM5B	AT1	6.08811e-164	0.423772	0.233	0.116	1.12874e-159
CELF2	AT1	9.4937e-164	0.577345	0.622	0.511	1.76013e-159
ANXA11	AT1	1.71525e-163	0.603872	0.583	0.464	3.18007e-159
LENG8	AT1	1.5177e-162	0.575477	0.339	0.203	2.81381e-158
CHPF	AT1	1.65531e-162	0.287581	0.127	0.047	3.06894e-158
PLA2G12A	AT1	4.69074e-162	0.45101	0.208	0.101	8.69662e-158
ATN1	AT1	5.32974e-162	0.442907	0.223	0.112	9.88134e-158
ANKRD13A	AT1	2.74636e-161	0.558429	0.301	0.173	5.09175e-157
OSBPL9	AT1	4.12502e-161	0.520396	0.289	0.164	7.64779e-157
NINJ2	AT1	1.0096e-160	0.499131	0.184	0.085	1.8718e-156
ATL3	AT1	1.28793e-160	0.556759	0.308	0.182	2.38782e-156
VIMP	AT1	1.59505e-160	0.604815	0.539	0.413	2.95723e-156
CPNE3	AT1	3.10986e-160	0.588763	0.417	0.283	5.76568e-156
PLEKHO1	AT1	5.85357e-160	0.72941	0.366	0.227	1.08525e-155
SMURF2	AT1	1.16247e-159	0.467339	0.274	0.147	2.15523e-155
LRIG2	AT1	1.56513e-159	0.327534	0.12	0.043	2.90175e-155
PDLIM1	AT1	1.90256e-159	0.495869	0.419	0.265	3.52735e-155
TMEM59	AT1	1.99895e-159	0.512281	0.716	0.632	3.70605e-155
STX7	AT1	7.55926e-159	0.655664	0.362	0.236	1.40149e-154
ZNF33B	AT1	2.19782e-158	0.312678	0.135	0.052	4.07476e-154
SRF	AT1	2.73609e-158	0.488524	0.187	0.086	5.07272e-154
PACSIN2	AT1	5.76984e-158	0.514224	0.271	0.151	1.06973e-153
NACC2	AT1	1.41223e-157	0.314709	0.149	0.061	2.61828e-153
SRRM2	AT1	1.89917e-157	0.577721	0.753	0.681	3.52107e-153
PEBP1	AT1	2.84833e-157	0.536755	0.679	0.553	5.28081e-153
ANKRD27	AT1	7.20613e-157	0.318027	0.136	0.053	1.33602e-152
KTN1	AT1	1.27554e-156	0.599198	0.662	0.568	2.36486e-152
ZNF439	AT1	2.56355e-156	0.276026	0.102	0.034	4.75283e-152
COMTD1	AT1	4.18006e-156	0.468514	0.255	0.135	7.74983e-152
SCAPER	AT1	9.80929e-156	0.457189	0.23	0.115	1.81864e-151
DYNC1I2	AT1	2.24174e-155	0.628522	0.412	0.287	4.15619e-151
KIF1B	AT1	2.37532e-155	0.538045	0.287	0.165	4.40384e-151
CKAP4	AT1	3.69071e-155	0.377076	0.205	0.099	6.84258e-151
RIMKLB	AT1	4.4961e-154	0.350911	0.145	0.059	8.33577e-150
RBM47	AT1	6.89818e-154	0.550061	0.352	0.22	1.27892e-149
ARHGAP12	AT1	7.71425e-154	0.342459	0.176	0.078	1.43022e-149
STX12	AT1	2.5964e-153	0.772957	0.385	0.262	4.81372e-149
NISCH	AT1	6.70938e-153	0.388575	0.204	0.097	1.24392e-148
SLC35E1	AT1	8.7732e-153	0.454656	0.314	0.183	1.62655e-148
TMEM189	AT1	3.76902e-152	0.426833	0.189	0.09	6.98776e-148
ZNF106	AT1	9.0025e-152	0.635104	0.423	0.292	1.66906e-147
OTUD3	AT1	9.40266e-152	0.290564	0.104	0.036	1.74325e-147
PXN	AT1	1.32867e-151	0.409618	0.283	0.151	2.46336e-147
ZFYVE21	AT1	1.86614e-151	0.468077	0.229	0.12	3.45982e-147
PGRMC2	AT1	1.99122e-151	0.452693	0.271	0.15	3.69173e-147
POMT1	AT1	2.32783e-151	0.269605	0.108	0.038	4.31579e-147
AP1G1	AT1	3.82824e-151	0.525824	0.317	0.19	7.09756e-147
SEPTIN2	AT1	8.03097e-151	0.597895	0.525	0.41	1.48894e-146
N4BP2L2	AT1	1.19988e-150	0.560809	0.696	0.617	2.22458e-146
MT-ND2	AT1	9.3172e-150	0.426726	0.932	0.92	1.72741e-145
COMMD2	AT1	1.58914e-149	0.572149	0.327	0.202	2.94626e-145
RND3	AT1	1.75138e-149	0.394553	0.314	0.173	3.24706e-145
YPEL2	AT1	1.78278e-149	0.453661	0.233	0.121	3.30527e-145
CBR1	AT1	2.20482e-149	0.604507	0.304	0.187	4.08774e-145
KPNA3	AT1	3.73863e-148	0.586115	0.336	0.212	6.93142e-144
RCN1	AT1	2.65125e-147	0.441728	0.223	0.116	4.91542e-143
ZNF431	AT1	1.00228e-146	0.422501	0.158	0.068	1.85823e-142
PTPRE	AT1	2.85024e-146	0.448143	0.482	0.334	5.28434e-142
GAPVD1	AT1	2.85102e-146	0.536158	0.315	0.192	5.28579e-142
MBTPS1	AT1	8.34099e-146	0.538265	0.343	0.215	1.54642e-141
FAM73A	AT1	1.27127e-145	0.367951	0.191	0.09	2.35694e-141
GTF2IRD2B	AT1	1.44096e-145	0.324501	0.15	0.063	2.67153e-141
FAM107B	AT1	2.01654e-145	0.503302	0.672	0.574	3.73866e-141
PTCD3	AT1	1.60458e-144	0.45322	0.259	0.142	2.97489e-140
CYB5R3	AT1	2.30464e-144	0.59784	0.433	0.307	4.2728e-140
INPP5B	AT1	1.72142e-143	0.320377	0.124	0.048	3.19151e-139
CNIH4	AT1	4.28897e-143	0.571905	0.398	0.273	7.95175e-139
SPPL3	AT1	6.11421e-143	0.446131	0.255	0.141	1.13357e-138
PVR	AT1	9.70405e-143	0.372946	0.129	0.053	1.79913e-138
THRA	AT1	3.25086e-142	0.35081	0.184	0.086	6.0271e-138
TPM4	AT1	8.24583e-142	0.509804	0.636	0.517	1.52878e-137
MPPE1	AT1	1.06721e-141	0.429986	0.238	0.127	1.9786e-137
DHRS3	AT1	7.41859e-141	0.552302	0.322	0.201	1.37541e-136
RTN3	AT1	1.19214e-140	0.520621	0.468	0.339	2.21024e-136
RHOD	AT1	1.28655e-140	0.256892	0.102	0.037	2.38526e-136
JAG1	AT1	1.48412e-140	0.364688	0.151	0.066	2.75156e-136
LGMN	AT1	3.61554e-140	0.376202	0.232	0.123	6.70321e-136
SRSF11	AT1	1.27033e-139	0.547677	0.614	0.511	2.35519e-135
SOCS5	AT1	2.62148e-139	0.293207	0.136	0.056	4.86022e-135
MACF1	AT1	2.68623e-139	0.628812	0.557	0.438	4.98028e-135
KCTD9	AT1	3.63447e-139	0.408283	0.194	0.095	6.73832e-135
TPGS2	AT1	6.65893e-139	0.455962	0.25	0.139	1.23456e-134
LAMP1	AT1	1.17414e-138	0.499864	0.557	0.424	2.17686e-134
TMEM205	AT1	1.20054e-138	0.561406	0.318	0.203	2.2258e-134
NEIL1	AT1	1.78388e-138	0.325827	0.144	0.06	3.30731e-134
CSNK1E	AT1	4.09643e-138	0.530038	0.322	0.201	7.59479e-134
EFHC1	AT1	5.33653e-138	0.29934	0.171	0.077	9.89393e-134
PLEKHA5	AT1	2.13827e-136	0.35915	0.174	0.08	3.96435e-132
MYL12A	AT1	3.27135e-136	0.366813	0.894	0.891	6.06509e-132
TBL1XR1	AT1	3.02356e-135	0.53799	0.396	0.269	5.60568e-131
TNFRSF1A	AT1	9.15905e-135	0.541852	0.329	0.212	1.69809e-130
RNH1	AT1	1.00573e-134	0.572477	0.563	0.436	1.86462e-130
PDDC1	AT1	1.81652e-134	0.304124	0.121	0.048	3.36783e-130
TWSG1	AT1	8.01889e-134	0.348838	0.159	0.073	1.4867e-129
MT-ND1	AT1	1.97067e-133	0.443086	0.92	0.906	3.65362e-129
BAZ2A	AT1	2.30737e-133	0.526599	0.325	0.203	4.27786e-129
NBPF12	AT1	2.42967e-133	0.674091	0.142	0.062	4.50461e-129
GTF3C4	AT1	6.07358e-133	0.313464	0.148	0.065	1.12604e-128
USP53	AT1	6.27375e-133	0.393505	0.208	0.106	1.16315e-128
DSC2	AT1	1.22368e-132	0.50699	0.183	0.093	2.2687e-128
RARRES3	AT1	1.95346e-132	0.634807	0.602	0.488	3.62171e-128
LSS	AT1	4.12249e-132	0.303768	0.125	0.051	7.6431e-128
C20orf194	AT1	7.0077e-132	0.390371	0.161	0.075	1.29923e-127
SAT1	AT1	1.00778e-131	0.31072	0.912	0.834	1.86843e-127
TRIM23	AT1	5.01476e-131	0.282967	0.143	0.062	9.29736e-127
EXOC6B	AT1	7.35307e-131	0.265371	0.114	0.045	1.36326e-126
GATAD1	AT1	1.68311e-130	0.571712	0.316	0.202	3.12048e-126
DAGLB	AT1	4.12183e-130	0.282919	0.115	0.045	7.64187e-126
MARVELD1	AT1	6.17743e-130	0.353465	0.143	0.064	1.1453e-125
PKN2	AT1	8.29868e-130	0.571131	0.388	0.268	1.53857e-125
MFHAS1	AT1	1.00575e-129	0.493633	0.252	0.145	1.86466e-125
RP11-1407O15.2	AT1	1.09682e-129	0.280329	0.105	0.039	2.0335e-125
LGALS8	AT1	1.88299e-129	0.519288	0.306	0.192	3.49107e-125
GSAP	AT1	3.12525e-129	0.514513	0.311	0.195	5.79422e-125
MSMO1	AT1	1.22885e-128	0.601079	0.266	0.156	2.27829e-124
TCEAL4	AT1	7.25676e-128	0.588289	0.327	0.215	1.3454e-123
MT-ND4	AT1	1.13145e-127	0.412037	0.959	0.949	2.0977e-123
HOOK3	AT1	1.88707e-127	0.564448	0.37	0.254	3.49862e-123
RHOB	AT1	2.41922e-127	0.791036	0.501	0.377	4.48522e-123
ROCK2	AT1	7.3092e-127	0.531455	0.287	0.177	1.35513e-122
ORMDL3	AT1	8.02435e-127	0.323198	0.183	0.088	1.48771e-122
CLTC	AT1	1.4061e-126	0.563993	0.436	0.32	2.60691e-122
SPRED2	AT1	2.78044e-126	0.270932	0.121	0.05	5.15494e-122
AHCYL1	AT1	7.96873e-126	0.53562	0.369	0.256	1.4774e-121
DNAJB4	AT1	1.37669e-125	0.765211	0.292	0.18	2.55238e-121
UBN2	AT1	7.78982e-125	0.401888	0.193	0.098	1.44423e-120
TMEM165	AT1	5.63009e-124	0.596502	0.479	0.372	1.04382e-119
FAM174A	AT1	8.4846e-124	0.36704	0.232	0.128	1.57305e-119
CERS4	AT1	1.10273e-123	0.318586	0.163	0.076	2.04446e-119
AKTIP	AT1	1.2341e-123	0.280732	0.165	0.077	2.28803e-119
HSDL2	AT1	1.31307e-123	0.537128	0.251	0.15	2.43444e-119
PITRM1	AT1	2.2203e-123	0.323989	0.147	0.067	4.11644e-119
SMAD5	AT1	3.07247e-123	0.429821	0.251	0.144	5.69635e-119
PTPLB	AT1	1.8111e-122	0.369162	0.191	0.098	3.35778e-118
SLC11A2	AT1	1.85657e-122	0.525766	0.221	0.124	3.44209e-118
BCAP29	AT1	3.57114e-122	0.540663	0.34	0.229	6.62089e-118
NPHP3	AT1	4.71436e-122	0.391952	0.187	0.094	8.74043e-118
LRRC8A	AT1	5.55122e-122	0.310698	0.189	0.094	1.0292e-117
CLCC1	AT1	8.84853e-122	0.310943	0.146	0.066	1.64052e-117
FER	AT1	6.71027e-121	0.352833	0.151	0.071	1.24408e-116
GDF15	AT1	7.50692e-121	0.765878	0.17	0.083	1.39178e-116
OSBPL10	AT1	2.61129e-120	0.280555	0.112	0.045	4.84132e-116
ZYG11B	AT1	2.66332e-120	0.487045	0.22	0.124	4.93779e-116
CAPN1	AT1	2.95262e-120	0.496405	0.316	0.206	5.47416e-116
INPPL1	AT1	3.04943e-120	0.454253	0.197	0.105	5.65364e-116
TPRA1	AT1	3.52005e-120	0.345592	0.161	0.077	6.52617e-116
CCDC12	AT1	4.9713e-120	0.530782	0.417	0.297	9.21679e-116
SLC39A1	AT1	8.44735e-120	0.527248	0.301	0.195	1.56614e-115
NF1	AT1	1.61464e-119	0.4654	0.256	0.152	2.99355e-115
SCAMP2	AT1	3.99486e-119	0.568657	0.406	0.298	7.40647e-115
ITFG1	AT1	4.3446e-119	0.475066	0.289	0.183	8.05489e-115
SYNE2	AT1	7.82947e-119	0.325312	0.616	0.442	1.45158e-114
STT3B	AT1	1.02994e-118	0.551697	0.407	0.294	1.90951e-114
FHL1	AT1	1.49537e-118	0.734098	0.247	0.145	2.77241e-114
THOC2	AT1	4.13076e-118	0.556183	0.411	0.296	7.65842e-114
VMP1	AT1	5.80412e-118	0.809316	0.573	0.48	1.07608e-113
ATXN1	AT1	8.71112e-118	0.509312	0.351	0.233	1.61504e-113
DIRC2	AT1	4.64538e-117	0.353805	0.145	0.068	8.61253e-113
ACACA	AT1	7.65404e-117	0.254725	0.113	0.046	1.41906e-112
ACOX1	AT1	5.81589e-116	0.502771	0.248	0.15	1.07827e-111
RAD50	AT1	7.78664e-116	0.506083	0.304	0.196	1.44364e-111
SPIN1	AT1	8.37013e-116	0.409821	0.232	0.133	1.55182e-111
CEPT1	AT1	2.4483e-115	0.404949	0.185	0.097	4.53915e-111
FLNA	AT1	2.62624e-115	0.48188	0.672	0.56	4.86904e-111
LRBA	AT1	3.53151e-115	0.358464	0.262	0.15	6.54743e-111
FAM115A	AT1	5.57858e-115	0.345249	0.167	0.083	1.03427e-110
LMBRD1	AT1	8.09359e-115	0.483834	0.325	0.217	1.50055e-110
CLMN	AT1	2.45517e-114	0.401522	0.158	0.078	4.55188e-110
PLXNA3	AT1	4.60564e-114	0.297031	0.11	0.046	8.53886e-110
MACC1	AT1	7.62675e-114	0.57628	0.21	0.119	1.414e-109
CDK6	AT1	9.81067e-114	0.361168	0.225	0.122	1.8189e-109
USP22	AT1	1.85624e-113	0.467074	0.321	0.21	3.44147e-109
PTAR1	AT1	1.93368e-113	0.378137	0.242	0.137	3.58504e-109
SEPTIN8	AT1	2.00861e-113	0.25055	0.108	0.044	3.72397e-109
FOXO3	AT1	3.79088e-113	0.490121	0.35	0.236	7.02829e-109
ITFG3	AT1	7.08218e-113	0.362958	0.161	0.08	1.31304e-108
HSD17B4	AT1	1.72231e-112	0.531967	0.297	0.196	3.19316e-108
MKLN1	AT1	3.82815e-112	0.430553	0.283	0.175	7.0974e-108
GTF2IRD2	AT1	5.18106e-112	0.313778	0.125	0.055	9.60568e-108
CYB561	AT1	5.23233e-112	0.294558	0.164	0.08	9.70073e-108
AKAP11	AT1	1.71846e-111	0.478444	0.237	0.139	3.18603e-107
ARL8A	AT1	4.76381e-111	0.50363	0.357	0.25	8.8321e-107
CLEC16A	AT1	6.76596e-111	0.271374	0.116	0.049	1.25441e-106
TNRC6A	AT1	6.83709e-111	0.513379	0.306	0.198	1.2676e-106
ELOVL5	AT1	7.24881e-111	0.545961	0.392	0.278	1.34393e-106
LZTS2	AT1	9.54544e-111	0.266909	0.104	0.042	1.76973e-106
NIPAL3	AT1	1.20795e-110	0.321637	0.181	0.092	2.23954e-106
UTP14C	AT1	1.77515e-110	0.261384	0.119	0.051	3.29112e-106
ZNF451	AT1	1.83007e-110	0.474719	0.32	0.207	3.39295e-106
FAS	AT1	3.89663e-110	0.348716	0.245	0.139	7.22435e-106
NT5C2	AT1	3.27197e-109	0.490816	0.255	0.157	6.06622e-105
GOLGA2	AT1	3.85844e-109	0.451304	0.283	0.178	7.15354e-105
PIK3C2A	AT1	5.47524e-109	0.419635	0.272	0.166	1.01511e-104
MANBAL	AT1	8.05816e-109	0.308487	0.136	0.064	1.49398e-104
MFN2	AT1	2.23784e-108	0.410326	0.186	0.1	4.14896e-104
CCNT2	AT1	5.36597e-107	0.407191	0.247	0.146	9.94851e-103
TMEM109	AT1	6.05473e-107	0.464563	0.346	0.236	1.12255e-102
RAB11FIP2	AT1	8.00647e-107	0.372545	0.182	0.096	1.4844e-102
CTDSP2	AT1	8.95501e-107	0.401125	0.278	0.174	1.66026e-102
SMYD2	AT1	1.5128e-106	0.388897	0.191	0.103	2.80474e-102
RAB2A	AT1	1.83828e-106	0.505714	0.53	0.44	3.40817e-102
MLH3	AT1	1.89479e-106	0.332463	0.158	0.078	3.51295e-102
TMEM168	AT1	2.51464e-106	0.326047	0.158	0.078	4.66215e-102
SASH1	AT1	4.67074e-106	0.371961	0.167	0.087	8.65955e-102
HECTD4	AT1	4.75492e-106	0.375363	0.178	0.092	8.81563e-102
USP25	AT1	1.30082e-105	0.472402	0.273	0.174	2.41172e-101
YIPF3	AT1	1.40489e-105	0.505941	0.336	0.234	2.60466e-101
FRS2	AT1	1.66596e-105	0.28723	0.139	0.066	3.08869e-101
RB1CC1	AT1	2.25136e-105	0.549185	0.4	0.293	4.17402e-101
PPDPF	AT1	2.95594e-105	0.55694	0.656	0.597	5.48032e-101
SLC25A22	AT1	3.57546e-105	0.255713	0.104	0.043	6.62891e-101
AGO3	AT1	3.29008e-104	0.51199	0.282	0.18	6.09981e-100
POLK	AT1	4.63458e-104	0.469781	0.254	0.157	8.5925e-100
TUBA1C	AT1	7.96441e-104	0.538186	0.463	0.353	1.4766e-99
MYADM	AT1	8.99411e-104	0.636562	0.621	0.54	1.66751e-99
RILP	AT1	9.69673e-104	0.417735	0.173	0.094	1.79777e-99
CYFIP1	AT1	1.06339e-103	0.473105	0.253	0.16	1.97153e-99
C5orf15	AT1	1.49077e-103	0.443727	0.271	0.172	2.7639e-99
RRAD	AT1	2.1743e-103	0.940759	0.211	0.119	4.03116e-99
ZNF664	AT1	2.17717e-103	0.33919	0.182	0.097	4.03648e-99
WDR60	AT1	5.61167e-103	0.355293	0.208	0.115	1.0404e-98
DIXDC1	AT1	1.16976e-102	0.32438	0.121	0.055	2.16873e-98
LUC7L3	AT1	1.23682e-102	0.566848	0.543	0.449	2.29306e-98
ECHDC2	AT1	1.51085e-102	0.459145	0.243	0.148	2.80111e-98
NKTR	AT1	1.52324e-102	0.506679	0.525	0.418	2.82409e-98
DENND1B	AT1	1.80872e-102	0.423126	0.249	0.151	3.35337e-98
ARRB1	AT1	2.32565e-102	0.453869	0.205	0.12	4.31175e-98
ELOVL1	AT1	2.77885e-102	0.479651	0.284	0.186	5.152e-98
AP2A2	AT1	3.73398e-102	0.441402	0.219	0.128	6.92279e-98
P4HB	AT1	1.43167e-101	0.504549	0.528	0.433	2.65431e-97
KIAA0247	AT1	1.84029e-101	0.442696	0.298	0.196	3.4119e-97
RGCC	AT1	2.46355e-101	0.741373	0.75	0.671	4.56742e-97
GOLPH3	AT1	3.39387e-101	0.449962	0.325	0.22	6.29223e-97
MTA3	AT1	5.48706e-101	0.257047	0.113	0.049	1.0173e-96
NOTCH2	AT1	8.86277e-101	0.383881	0.232	0.138	1.64316e-96
ADAM10	AT1	5.26932e-100	0.466614	0.379	0.274	9.76932e-96
HBA2	AT1	1.21117e-99	0.851045	0.242	0.142	2.2455e-95
HYI	AT1	1.89801e-99	0.363597	0.182	0.1	3.51892e-95
TAPT1	AT1	4.442e-99	0.368001	0.197	0.109	8.23547e-95
PPP1R12C	AT1	5.33965e-99	0.413029	0.201	0.114	9.89971e-95
RBMS2	AT1	7.33505e-99	0.345083	0.134	0.065	1.35992e-94
PUM1	AT1	8.53417e-99	0.485639	0.381	0.278	1.58224e-94
SRC	AT1	1.9999e-98	0.372912	0.137	0.067	3.70781e-94
UBC	AT1	2.04989e-98	0.557901	0.934	0.949	3.8005e-94
CHP1	AT1	2.61233e-98	0.504766	0.323	0.227	4.84326e-94
FMN1	AT1	7.50879e-98	0.280541	0.132	0.063	1.39213e-93
SORT1	AT1	8.94534e-98	0.507628	0.258	0.167	1.65847e-93
LBH	AT1	1.13981e-97	0.557064	0.449	0.321	2.11321e-93
OTUD4	AT1	1.24804e-97	0.399461	0.25	0.154	2.31387e-93
PPP2R3A	AT1	2.19418e-97	0.297094	0.112	0.05	4.06801e-93
RUFY2	AT1	5.12389e-97	0.3252	0.152	0.077	9.49968e-93
CAMK2G	AT1	8.90446e-97	0.290819	0.166	0.085	1.65089e-92
DCTN4	AT1	9.09641e-97	0.426955	0.235	0.144	1.68647e-92
TTC37	AT1	1.47911e-96	0.496874	0.295	0.199	2.74226e-92
POMGNT1	AT1	1.5611e-96	0.312101	0.143	0.071	2.89427e-92
BCAR1	AT1	1.97301e-96	0.289589	0.121	0.057	3.65796e-92
LRRFIP1	AT1	2.58472e-96	0.36341	0.765	0.684	4.79206e-92
NUMA1	AT1	2.69051e-96	0.475952	0.363	0.26	4.9882e-92
TMEM150A	AT1	3.50779e-96	0.345722	0.148	0.076	6.50345e-92
ZRANB2	AT1	4.14295e-96	0.502482	0.438	0.335	7.68102e-92
HIST1H1C	AT1	5.04396e-96	0.445833	0.3	0.192	9.3515e-92
SYPL1	AT1	5.05528e-96	0.445861	0.391	0.289	9.37248e-92
AAMDC	AT1	5.96915e-96	0.430901	0.205	0.121	1.10668e-91
CXCL2	AT1	6.49506e-96	0.550297	0.459	0.325	1.20418e-91
ANK3	AT1	1.08151e-95	0.265513	0.163	0.082	2.00513e-91
ZBED3	AT1	1.37821e-95	0.265827	0.105	0.046	2.55519e-91
ATAD1	AT1	3.95645e-95	0.397644	0.262	0.165	7.33525e-91
DPP9	AT1	6.75464e-95	0.433171	0.231	0.141	1.25231e-90
KLC1	AT1	1.1969e-94	0.368084	0.23	0.138	2.21905e-90
NRP2	AT1	1.93018e-94	0.479164	0.17	0.093	3.57856e-90
LRRC42	AT1	1.96563e-94	0.268191	0.113	0.051	3.64428e-90
SNX1	AT1	3.49606e-94	0.476056	0.293	0.198	6.4817e-90
MAP4	AT1	3.70398e-94	0.517866	0.38	0.282	6.86717e-90
DIAPH2	AT1	3.7951e-94	0.483448	0.254	0.163	7.03611e-90
RPN1	AT1	3.79824e-94	0.476651	0.387	0.289	7.04194e-90
ILK	AT1	6.33607e-94	0.480702	0.317	0.22	1.17471e-89
ARRDC3	AT1	7.74896e-94	0.476458	0.357	0.246	1.43666e-89
EID1	AT1	9.24654e-94	0.466761	0.586	0.515	1.71431e-89
CLOCK	AT1	1.27866e-93	0.370054	0.185	0.103	2.37063e-89
PDCD6IP	AT1	2.14379e-93	0.502472	0.415	0.318	3.97458e-89
ADH5	AT1	2.70294e-93	0.49444	0.361	0.265	5.01125e-89
PPP3CA	AT1	3.96491e-93	0.439577	0.388	0.282	7.35095e-89
YPEL3	AT1	4.03762e-93	0.409559	0.505	0.39	7.48576e-89
C10orf118	AT1	8.06055e-93	0.424944	0.372	0.262	1.49443e-88
TRIOBP	AT1	8.71986e-93	0.351059	0.177	0.098	1.61666e-88
SORBS3	AT1	9.21125e-93	0.382033	0.194	0.112	1.70777e-88
RABAC1	AT1	1.19469e-92	0.466333	0.604	0.537	2.21495e-88
PDE4DIP	AT1	1.67041e-92	0.527097	0.315	0.22	3.09695e-88
CREBZF	AT1	1.79687e-92	0.395225	0.281	0.178	3.3314e-88
RCOR3	AT1	2.00235e-92	0.344685	0.206	0.118	3.71236e-88
DICER1	AT1	2.61e-92	0.500186	0.319	0.223	4.83894e-88
AGPAT2	AT1	4.21773e-92	0.508899	0.332	0.237	7.81967e-88
NECAB3	AT1	5.37326e-92	0.27244	0.108	0.049	9.96203e-88
ARNT	AT1	6.14507e-92	0.327266	0.147	0.075	1.1393e-87
ZNF160	AT1	6.55842e-92	0.296512	0.168	0.089	1.21593e-87
KLHL42	AT1	7.67608e-92	0.264917	0.131	0.064	1.42315e-87
PEF1	AT1	1.15424e-91	0.401107	0.26	0.167	2.13997e-87
MPST	AT1	1.17177e-91	0.423558	0.258	0.168	2.17246e-87
KDM4A	AT1	1.23245e-91	0.282047	0.137	0.068	2.28496e-87
IFNAR1	AT1	1.29715e-91	0.482922	0.349	0.253	2.40492e-87
EIF4G2	AT1	1.73911e-91	0.388482	0.722	0.677	3.22431e-87
SNRNP70	AT1	1.87213e-91	0.530642	0.461	0.367	3.47092e-87
AFF1	AT1	2.11905e-91	0.403051	0.256	0.162	3.92872e-87
EI24	AT1	2.31762e-91	0.398351	0.259	0.167	4.29687e-87
BAG5	AT1	4.0353e-91	0.438205	0.292	0.195	7.48146e-87
TMEM87B	AT1	5.92849e-91	0.349897	0.188	0.107	1.09914e-86
RABGAP1	AT1	1.45851e-90	0.372617	0.22	0.133	2.70407e-86
WDR11	AT1	1.85291e-90	0.397677	0.214	0.128	3.4353e-86
CAPNS1	AT1	2.47751e-90	0.531027	0.479	0.397	4.5933e-86
RHOU	AT1	3.40888e-90	0.395356	0.177	0.1	6.32006e-86
FBXO7	AT1	3.6769e-90	0.46803	0.365	0.267	6.81697e-86
ACBD3	AT1	7.63447e-90	0.485556	0.373	0.278	1.41543e-85
CASD1	AT1	2.14675e-89	0.311147	0.19	0.106	3.98007e-85
UBR3	AT1	2.66672e-89	0.389783	0.192	0.111	4.94409e-85
SNX7	AT1	3.60432e-89	0.260596	0.117	0.055	6.68241e-85
KLHL9	AT1	6.27667e-89	0.333571	0.168	0.092	1.1637e-84
CITED4	AT1	7.33763e-89	0.287182	0.139	0.069	1.3604e-84
CXCL16	AT1	8.88059e-89	0.26347	0.42	0.278	1.64646e-84
RFC1	AT1	1.75706e-88	0.480216	0.342	0.241	3.25759e-84
KANSL3	AT1	2.74143e-88	0.336199	0.159	0.084	5.0826e-84
ATG2B	AT1	4.02483e-88	0.281363	0.139	0.07	7.46203e-84
MKL2	AT1	4.91179e-88	0.253276	0.135	0.067	9.10646e-84
BNIP3	AT1	7.39338e-88	0.258377	0.15	0.077	1.37073e-83
ARSD	AT1	1.03721e-87	0.384558	0.179	0.102	1.92298e-83
SREK1	AT1	1.10693e-87	0.488273	0.349	0.249	2.05225e-83
SCOC	AT1	1.6298e-87	0.46561	0.28	0.191	3.02164e-83
MRAS	AT1	2.919e-87	0.34759	0.132	0.068	5.41182e-83
WBP2	AT1	1.06408e-86	0.507703	0.372	0.282	1.97281e-82
VAPB	AT1	2.94671e-86	0.336546	0.188	0.107	5.46321e-82
MRPL33	AT1	3.65182e-86	0.483424	0.482	0.402	6.77047e-82
TMEM184B	AT1	3.88778e-86	0.326644	0.162	0.088	7.20795e-82
PCBP1	AT1	6.35495e-86	0.397454	0.679	0.629	1.17821e-81
SMG9	AT1	1.3831e-85	0.251677	0.103	0.046	2.56428e-81
YIPF4	AT1	1.45285e-85	0.44629	0.332	0.237	2.69358e-81
TRIP11	AT1	1.45886e-85	0.462733	0.293	0.2	2.70472e-81
ARHGEF18	AT1	2.08332e-85	0.258416	0.14	0.071	3.86247e-81
KIAA0355	AT1	2.6821e-85	0.341075	0.208	0.122	4.97262e-81
CISD1	AT1	4.51918e-85	0.378065	0.219	0.134	8.37855e-81
DNAJC16	AT1	9.09976e-85	0.28131	0.14	0.072	1.6871e-80
ECHDC1	AT1	1.31813e-84	0.506103	0.371	0.281	2.44381e-80
TMED7	AT1	1.42501e-84	0.441457	0.285	0.197	2.64197e-80
SPAG1	AT1	2.69139e-84	0.280364	0.16	0.084	4.98984e-80
KMT2C	AT1	3.9455e-84	0.459804	0.433	0.339	7.31495e-80
YWHAH	AT1	6.15563e-84	0.443082	0.488	0.379	1.14125e-79
SLC20A2	AT1	6.60902e-84	0.325267	0.175	0.097	1.22531e-79
UBE2H	AT1	7.67943e-84	0.445022	0.383	0.287	1.42377e-79
KLHDC10	AT1	1.07547e-83	0.313033	0.152	0.082	1.99392e-79
DEGS1	AT1	1.97639e-83	0.458753	0.366	0.273	3.66423e-79
ME1	AT1	5.70852e-83	0.282599	0.104	0.049	1.05836e-78
KDSR	AT1	5.86531e-83	0.434152	0.336	0.244	1.08743e-78
AHI1	AT1	7.84473e-83	0.495549	0.331	0.234	1.45441e-78
TMEM68	AT1	1.08392e-82	0.278942	0.153	0.082	2.00958e-78
PFDN1	AT1	1.09743e-82	0.515828	0.338	0.25	2.03463e-78
RAB3GAP1	AT1	1.39726e-82	0.405969	0.231	0.147	2.59051e-78
SGK223	AT1	1.50722e-82	0.292341	0.117	0.057	2.79439e-78
TRAF4	AT1	3.72633e-82	0.302704	0.223	0.132	6.90862e-78
MVP	AT1	4.37783e-82	0.482417	0.314	0.226	8.1165e-78
NAB2	AT1	5.99076e-82	0.278955	0.114	0.054	1.11069e-77
LARP1B	AT1	6.69737e-82	0.343041	0.167	0.093	1.24169e-77
CCNL2	AT1	7.16619e-82	0.416161	0.303	0.206	1.32861e-77
MRS2	AT1	9.98797e-82	0.328145	0.155	0.085	1.85177e-77
SPG7	AT1	1.26193e-81	0.395729	0.231	0.144	2.33961e-77
HIRIP3	AT1	1.80997e-81	0.282155	0.145	0.077	3.35568e-77
PCMTD1	AT1	2.38516e-81	0.456707	0.401	0.309	4.42209e-77
CNN2	AT1	3.41649e-81	0.402466	0.425	0.322	6.33417e-77
TUBB	AT1	3.57803e-81	0.437738	0.5	0.406	6.63367e-77
ZMYND11	AT1	6.94286e-81	0.374863	0.274	0.182	1.28721e-76
MLXIP	AT1	1.10159e-80	0.397375	0.252	0.163	2.04235e-76
SNX13	AT1	1.33934e-80	0.39706	0.223	0.141	2.48313e-76
TAGLN2	AT1	4.78149e-80	0.287058	0.802	0.761	8.86488e-76
MT-ND5	AT1	6.55625e-80	0.37637	0.828	0.805	1.21553e-75
DHX15	AT1	1.00638e-79	0.435547	0.304	0.214	1.86584e-75
DGKD	AT1	1.6692e-79	0.425875	0.22	0.133	3.0947e-75
CTSO	AT1	1.77581e-79	0.320337	0.18	0.105	3.29235e-75
SLC19A3	AT1	1.86945e-79	0.324527	0.104	0.049	3.46596e-75
STAT3	AT1	3.06457e-79	0.455072	0.627	0.563	5.68171e-75
NPEPL1	AT1	3.35294e-79	0.367389	0.155	0.086	6.21635e-75
SECISBP2L	AT1	5.11874e-79	0.444205	0.3	0.211	9.49015e-75
C1RL	AT1	5.62182e-79	0.300058	0.133	0.069	1.04228e-74
C6orf211	AT1	1.02276e-78	0.349023	0.183	0.109	1.8962e-74
ANKRD9	AT1	1.9143e-78	0.265842	0.139	0.072	3.54911e-74
HBB	AT1	1.9486e-78	0.69918	0.297	0.201	3.6127e-74
CCPG1	AT1	3.02754e-78	0.44319	0.409	0.319	5.61306e-74
FAM114A1	AT1	3.30608e-78	0.262876	0.108	0.052	6.12947e-74
TMEM106C	AT1	3.59139e-78	0.264627	0.168	0.094	6.65845e-74
SETD5	AT1	8.08852e-78	0.415829	0.277	0.187	1.49961e-73
MFSD6	AT1	1.37055e-77	0.354648	0.212	0.131	2.54099e-73
GPR107	AT1	3.37582e-77	0.33066	0.172	0.101	6.25877e-73
PHF10	AT1	4.9927e-77	0.371483	0.245	0.158	9.25646e-73
HPS5	AT1	5.83852e-77	0.479752	0.233	0.154	1.08246e-72
FASN	AT1	9.94171e-77	0.257367	0.137	0.071	1.84319e-72
LY6E	AT1	1.01409e-76	0.454057	0.651	0.55	1.88011e-72
RCOR1	AT1	1.96806e-76	0.468196	0.279	0.195	3.64878e-72
SSBP2	AT1	2.11085e-76	0.262085	0.152	0.082	3.91351e-72
MED15	AT1	2.96511e-76	0.390833	0.27	0.182	5.49732e-72
CNST	AT1	6.19022e-76	0.37221	0.217	0.136	1.14767e-71
ABHD11	AT1	8.93413e-76	0.298426	0.125	0.065	1.65639e-71
PDS5A	AT1	1.88075e-75	0.410632	0.308	0.219	3.48692e-71
ORMDL1	AT1	2.05558e-75	0.518736	0.519	0.444	3.81104e-71
ZBED5	AT1	2.64093e-75	0.320255	0.173	0.101	4.89629e-71
INPP5K	AT1	3.08307e-75	0.276361	0.165	0.093	5.71601e-71
NFX1	AT1	3.53196e-75	0.345199	0.196	0.119	6.54825e-71
TRIM13	AT1	6.27347e-75	0.381469	0.232	0.149	1.1631e-70
WHSC1	AT1	6.368e-75	0.311002	0.149	0.082	1.18063e-70
RAC1	AT1	8.87755e-75	0.323828	0.713	0.617	1.6459e-70
KIAA1430	AT1	1.29122e-74	0.416903	0.337	0.243	2.39391e-70
DBT	AT1	2.37424e-74	0.259407	0.114	0.056	4.40183e-70
ACSS1	AT1	2.94007e-74	0.273434	0.164	0.092	5.45088e-70
SNX18	AT1	3.24771e-74	0.341975	0.185	0.111	6.02126e-70
ASH1L	AT1	3.57249e-74	0.437572	0.455	0.365	6.62339e-70
CLIP1	AT1	7.7506e-74	0.527005	0.343	0.26	1.43696e-69
PNKD	AT1	8.86119e-74	0.455012	0.322	0.238	1.64287e-69
WIPF2	AT1	1.17721e-73	0.365212	0.259	0.174	2.18255e-69
ZC3H7B	AT1	2.29039e-73	0.255032	0.127	0.066	4.24638e-69
ARL8B	AT1	2.31724e-73	0.432694	0.378	0.292	4.29616e-69
RSPRY1	AT1	2.65669e-73	0.344226	0.19	0.115	4.9255e-69
SOCS6	AT1	6.99357e-73	0.323206	0.138	0.076	1.29661e-68
TTC17	AT1	1.26218e-72	0.371887	0.259	0.174	2.34008e-68
KIAA0368	AT1	1.7628e-72	0.416403	0.221	0.145	3.26822e-68
GANC	AT1	1.97884e-72	0.306085	0.101	0.048	3.66876e-68
CCNY	AT1	3.15397e-72	0.416284	0.315	0.229	5.84746e-68
SERTAD3	AT1	3.43165e-72	0.418466	0.23	0.151	6.36228e-68
MTHFR	AT1	6.21847e-72	0.306761	0.152	0.085	1.1529e-67
DNAJB2	AT1	8.31111e-72	0.375654	0.229	0.148	1.54088e-67
NPTN	AT1	1.09455e-71	0.436811	0.324	0.242	2.0293e-67
MLTK	AT1	1.19769e-71	0.324948	0.161	0.093	2.22051e-67
PLEC	AT1	1.32524e-71	0.423568	0.356	0.271	2.457e-67
USP6NL	AT1	1.3528e-71	0.295347	0.131	0.07	2.5081e-67
MICU1	AT1	1.47221e-71	0.440056	0.248	0.17	2.72947e-67
FAM126B	AT1	1.5575e-71	0.2568	0.205	0.125	2.88761e-67
PTP4A1	AT1	1.64899e-71	0.496519	0.438	0.356	3.05723e-67
MAPK3	AT1	1.78095e-71	0.284377	0.174	0.103	3.30188e-67
ETF1	AT1	1.91161e-71	0.471659	0.463	0.387	3.54413e-67
ENOSF1	AT1	3.76147e-71	0.430997	0.232	0.155	6.97377e-67
ULK1	AT1	3.86044e-71	0.261971	0.134	0.071	7.15725e-67
CAST	AT1	3.97016e-71	0.36357	0.688	0.633	7.36067e-67
TRIM8	AT1	5.49311e-71	0.318868	0.191	0.118	1.01842e-66
C3	AT1	1.38277e-70	0.295999	0.126	0.065	2.56366e-66
EPM2AIP1	AT1	1.60512e-70	0.364057	0.244	0.159	2.9759e-66
PPP2R5A	AT1	3.25646e-70	0.426409	0.333	0.247	6.03748e-66
NUP153	AT1	7.05851e-70	0.3457	0.24	0.158	1.30865e-65
TRA2A	AT1	9.8808e-70	0.493962	0.441	0.356	1.8319e-65
MAP3K13	AT1	1.18084e-69	0.440178	0.303	0.222	2.18929e-65
TMEM41A	AT1	1.2347e-69	0.268695	0.147	0.082	2.28914e-65
KATNBL1	AT1	1.70854e-69	0.415229	0.302	0.219	3.16763e-65
CYTH2	AT1	2.6612e-69	0.381535	0.254	0.173	4.93387e-65
PMVK	AT1	3.66385e-69	0.398159	0.242	0.163	6.79277e-65
FAM168B	AT1	5.82003e-69	0.320864	0.198	0.124	1.07903e-64
ANKFY1	AT1	6.4021e-69	0.330552	0.167	0.1	1.18695e-64
INO80E	AT1	1.00069e-68	0.348837	0.188	0.115	1.85527e-64
LIMK2	AT1	1.45319e-68	0.301371	0.163	0.095	2.69422e-64
CSAD	AT1	1.69546e-68	0.333114	0.155	0.088	3.14337e-64
ACSS2	AT1	4.64775e-68	0.301362	0.122	0.065	8.61692e-64
CLCN3	AT1	1.37414e-67	0.344283	0.22	0.143	2.54766e-63
MBOAT1	AT1	1.90351e-67	0.269024	0.132	0.072	3.52911e-63
FAM160A2	AT1	2.83212e-67	0.278163	0.127	0.068	5.25074e-63
SIPA1L1	AT1	2.97091e-67	0.333773	0.221	0.142	5.50806e-63
CXorf23	AT1	2.97887e-67	0.253664	0.119	0.062	5.52282e-63
MCFD2	AT1	6.90154e-67	0.423319	0.267	0.192	1.27955e-62
TMEM160	AT1	1.1921e-66	0.473707	0.426	0.353	2.21016e-62
KLF9	AT1	1.33132e-66	0.341212	0.387	0.291	2.46826e-62
UBP1	AT1	1.42568e-66	0.345119	0.199	0.127	2.6432e-62
ATF6	AT1	1.59787e-66	0.419756	0.276	0.199	2.96246e-62
RAB6A	AT1	1.99582e-66	0.428456	0.346	0.265	3.70026e-62
RNF170	AT1	2.14754e-66	0.259923	0.128	0.069	3.98153e-62
HSD17B11	AT1	2.55846e-66	0.496135	0.413	0.341	4.74339e-62
SLC4A2	AT1	2.95607e-66	0.331906	0.169	0.103	5.48055e-62
C14orf1	AT1	3.28949e-66	0.311773	0.216	0.138	6.09872e-62
CDC42BPB	AT1	3.47687e-66	0.409639	0.196	0.129	6.44611e-62
POR	AT1	3.98636e-66	0.442586	0.339	0.257	7.39071e-62
ZMAT1	AT1	4.81276e-66	0.295338	0.13	0.071	8.92286e-62
SH3GLB2	AT1	6.60881e-66	0.346083	0.224	0.147	1.22527e-61
PDLIM5	AT1	8.34364e-66	0.437428	0.289	0.212	1.54691e-61
DOCK1	AT1	1.78225e-65	0.270497	0.112	0.059	3.30428e-61
PSMB5	AT1	1.85072e-65	0.432716	0.337	0.26	3.43123e-61
ERLEC1	AT1	2.01542e-65	0.425079	0.337	0.257	3.73659e-61
RNF38	AT1	2.02431e-65	0.295398	0.201	0.126	3.75306e-61
DCAF6	AT1	4.12155e-65	0.349586	0.187	0.118	7.64136e-61
PLAC8	AT1	6.88925e-65	0.270199	0.482	0.37	1.27727e-60
PPP6R3	AT1	2.16813e-64	0.364516	0.291	0.207	4.01971e-60
DHRS1	AT1	3.10197e-64	0.331927	0.16	0.096	5.75105e-60
EDC4	AT1	5.38566e-64	0.327527	0.138	0.078	9.98502e-60
GOLGA4	AT1	7.88755e-64	0.452262	0.461	0.389	1.46235e-59
REV1	AT1	8.65927e-64	0.361498	0.215	0.141	1.60543e-59
ZC3H7A	AT1	1.10512e-63	0.403021	0.274	0.195	2.04889e-59
ATP13A3	AT1	1.24574e-63	0.342531	0.304	0.221	2.3096e-59
DCAF8	AT1	1.52012e-63	0.299736	0.194	0.123	2.8183e-59
MED13L	AT1	3.1655e-63	0.379349	0.315	0.231	5.86885e-59
SENP6	AT1	3.74184e-63	0.405732	0.372	0.291	6.93737e-59
VPS13B	AT1	4.26563e-63	0.306389	0.175	0.106	7.90848e-59
FAM214A	AT1	5.84682e-63	0.289143	0.207	0.13	1.084e-58
PABPN1	AT1	7.05145e-63	0.430285	0.438	0.36	1.30734e-58
ZNF277	AT1	8.79117e-63	0.375487	0.206	0.134	1.62988e-58
RBM5	AT1	1.30418e-62	0.385938	0.376	0.291	2.41795e-58
SRGAP2	AT1	2.28059e-62	0.33676	0.174	0.109	4.22821e-58
CBX1	AT1	2.7948e-62	0.343313	0.218	0.145	5.18155e-58
ARRDC1	AT1	3.4753e-62	0.390706	0.255	0.178	6.4432e-58
UBA1	AT1	3.55309e-62	0.398077	0.275	0.201	6.58744e-58
ZBTB41	AT1	3.80845e-62	0.253915	0.137	0.077	7.06086e-58
MAST4	AT1	4.73121e-62	0.303831	0.178	0.109	8.77167e-58
NBPF10	AT1	6.34373e-62	0.328296	0.219	0.145	1.17613e-57
CTSF	AT1	1.02892e-61	0.253113	0.124	0.068	1.90762e-57
CLIP4	AT1	1.27824e-61	0.415386	0.224	0.153	2.36986e-57
AKR1C2	AT1	1.66536e-61	0.269048	0.115	0.061	3.08758e-57
PLD3	AT1	7.77042e-61	0.301719	0.349	0.256	1.44064e-56
TFG	AT1	1.72563e-60	0.402598	0.329	0.254	3.19932e-56
HMHA1	AT1	2.91655e-60	0.297187	0.307	0.215	5.40729e-56
DDX1	AT1	3.6369e-60	0.3957	0.254	0.182	6.74281e-56
WWP1	AT1	3.73316e-60	0.31899	0.222	0.147	6.92129e-56
AKAP1	AT1	3.89128e-60	0.274594	0.162	0.098	7.21443e-56
ACSL3	AT1	5.56158e-60	0.415336	0.32	0.245	1.03112e-55
BRD3	AT1	5.81868e-60	0.301496	0.188	0.119	1.07878e-55
PPP2R2A	AT1	8.82207e-60	0.400877	0.359	0.28	1.63561e-55
FAM219B	AT1	1.8265e-59	0.283705	0.145	0.084	3.38634e-55
DERA	AT1	3.12648e-59	0.371992	0.216	0.148	5.79649e-55
SLC25A24	AT1	1.5386e-58	0.442645	0.296	0.225	2.85256e-54
PHACTR1	AT1	2.19848e-58	0.29644	0.259	0.184	4.07597e-54
TMEM259	AT1	2.71027e-58	0.394496	0.413	0.335	5.02484e-54
BTBD7	AT1	3.57388e-58	0.323153	0.248	0.172	6.62597e-54
ABCB8	AT1	3.58649e-58	0.267931	0.12	0.066	6.64935e-54
ARHGAP31	AT1	4.37962e-58	0.346572	0.147	0.089	8.11982e-54
RIOK3	AT1	4.555e-58	0.44126	0.413	0.342	8.44496e-54
DYNLRB1	AT1	5.14426e-58	0.452507	0.542	0.484	9.53746e-54
ANKRD36	AT1	7.71955e-58	0.368722	0.282	0.2	1.43121e-53
TMEM106B	AT1	7.80218e-58	0.344935	0.249	0.176	1.44652e-53
MAP4K3	AT1	8.70536e-58	0.290214	0.125	0.071	1.61397e-53
TMEM50B	AT1	9.17428e-58	0.322984	0.287	0.205	1.70091e-53
FAM3B	AT1	1.3177e-57	0.253657	0.101	0.053	2.44302e-53
CANT1	AT1	2.39848e-57	0.266283	0.149	0.09	4.44678e-53
ZNF33A	AT1	3.51547e-57	0.295741	0.239	0.163	6.51768e-53
ZNF638	AT1	5.84064e-57	0.439841	0.335	0.26	1.08286e-52
ANKIB1	AT1	6.7609e-57	0.346035	0.22	0.15	1.25347e-52
ATP10D	AT1	8.24942e-57	0.257394	0.141	0.082	1.52944e-52
SEC63	AT1	8.42494e-57	0.396624	0.319	0.246	1.56198e-52
C2orf68	AT1	1.27226e-56	0.278718	0.138	0.081	2.35876e-52
RNF217	AT1	2.35344e-56	0.276491	0.101	0.054	4.36327e-52
MORF4L2	AT1	3.46089e-56	0.383475	0.482	0.41	6.4165e-52
HDAC2	AT1	4.7992e-56	0.361439	0.263	0.191	8.89771e-52
PEX13	AT1	4.81737e-56	0.302263	0.16	0.099	8.9314e-52
NOTCH2NL	AT1	5.24902e-56	0.354182	0.25	0.178	9.73168e-52
FAM20B	AT1	9.54916e-56	0.253066	0.138	0.082	1.77041e-51
CHML	AT1	1.36013e-55	0.389935	0.171	0.109	2.52169e-51
HPS4	AT1	2.23042e-55	0.289201	0.157	0.096	4.13521e-51
BDH2	AT1	2.43921e-55	0.288366	0.165	0.103	4.52229e-51
ZMYM2	AT1	3.29152e-55	0.34631	0.292	0.214	6.10249e-51
TMEM123	AT1	4.57015e-55	0.353044	0.519	0.457	8.47306e-51
DVL3	AT1	5.0916e-55	0.310206	0.174	0.112	9.43982e-51
CCDC47	AT1	7.91281e-55	0.407855	0.371	0.303	1.46704e-50
RBM6	AT1	8.94483e-55	0.400381	0.334	0.256	1.65837e-50
HNRNPH1	AT1	9.10167e-55	0.314959	0.675	0.633	1.68745e-50
MKNK2	AT1	9.36243e-55	0.345851	0.419	0.338	1.73579e-50
ICMT	AT1	9.47929e-55	0.286242	0.15	0.092	1.75746e-50
AFG3L2	AT1	1.02085e-54	0.362325	0.243	0.173	1.89266e-50
CELF1	AT1	1.10666e-54	0.427394	0.37	0.301	2.05174e-50
TAOK1	AT1	1.22225e-54	0.397429	0.33	0.258	2.26604e-50
CDK2AP1	AT1	1.34338e-54	0.375191	0.247	0.179	2.49063e-50
CAMK2D	AT1	1.52281e-54	0.342259	0.25	0.178	2.82328e-50
ZNF644	AT1	1.79389e-54	0.428992	0.397	0.322	3.32587e-50
MSL1	AT1	2.42732e-54	0.300197	0.256	0.182	4.50026e-50
TOP1	AT1	3.66512e-54	0.493298	0.522	0.474	6.79514e-50
SLMAP	AT1	5.95188e-54	0.315233	0.186	0.122	1.10348e-49
BSDC1	AT1	9.24328e-54	0.305562	0.224	0.154	1.7137e-49
PLA2G16	AT1	1.23002e-53	0.343437	0.407	0.316	2.28046e-49
LRRC41	AT1	1.63293e-53	0.294416	0.19	0.126	3.02745e-49
MDM4	AT1	2.16095e-53	0.333771	0.356	0.274	4.00639e-49
SACM1L	AT1	2.9922e-53	0.302721	0.234	0.162	5.54754e-49
FBXO21	AT1	3.2055e-53	0.280316	0.224	0.152	5.94299e-49
TP53I11	AT1	6.19836e-53	0.284916	0.141	0.086	1.14918e-48
PIGS	AT1	8.25029e-53	0.290159	0.168	0.107	1.5296e-48
SMAD2	AT1	1.84697e-52	0.391038	0.288	0.219	3.42428e-48
BAD	AT1	2.20152e-52	0.350008	0.246	0.178	4.08161e-48
BRWD1	AT1	2.91178e-52	0.313126	0.279	0.203	5.39843e-48
WDR41	AT1	3.86755e-52	0.30815	0.145	0.089	7.17045e-48
MUM1	AT1	5.7089e-52	0.309125	0.199	0.132	1.05843e-47
OPN3	AT1	6.03514e-52	0.39885	0.216	0.154	1.11892e-47
MUT	AT1	7.27945e-52	0.272299	0.128	0.076	1.34961e-47
RYK	AT1	9.44807e-52	0.287835	0.216	0.147	1.75167e-47
CLPX	AT1	1.24432e-51	0.262674	0.17	0.108	2.30698e-47
UNC93B1	AT1	1.34322e-51	0.416481	0.271	0.205	2.49032e-47
PTOV1	AT1	2.4535e-51	0.301135	0.215	0.148	4.5488e-47
RALGAPB	AT1	2.4592e-51	0.270863	0.171	0.11	4.55935e-47
RCN2	AT1	2.82972e-51	0.337368	0.349	0.273	5.24629e-47
KIFAP3	AT1	5.91123e-51	0.280611	0.188	0.124	1.09594e-46
BFAR	AT1	6.02128e-51	0.353566	0.293	0.223	1.11635e-46
SUPT20H	AT1	7.64086e-51	0.311616	0.223	0.155	1.41661e-46
DHX29	AT1	1.18801e-50	0.387561	0.267	0.201	2.20257e-46
RTN4	AT1	1.24383e-50	0.268989	0.64	0.542	2.30606e-46
SAMD4B	AT1	1.31404e-50	0.337684	0.263	0.194	2.43623e-46
LARP4	AT1	1.33505e-50	0.411208	0.254	0.189	2.47517e-46
STAM	AT1	1.58864e-50	0.276471	0.202	0.137	2.94533e-46
SUGP2	AT1	1.88755e-50	0.32634	0.234	0.164	3.49952e-46
ATL2	AT1	1.92811e-50	0.255108	0.146	0.089	3.57472e-46
KDELR1	AT1	3.92787e-50	0.379944	0.421	0.357	7.28228e-46
SCAMP1	AT1	3.93294e-50	0.313943	0.22	0.155	7.29167e-46
TARDBP	AT1	4.16389e-50	0.348747	0.29	0.219	7.71985e-46
DDX42	AT1	4.78551e-50	0.35648	0.262	0.194	8.87234e-46
SVIL	AT1	5.81269e-50	0.373077	0.266	0.195	1.07767e-45
KLF13	AT1	7.22924e-50	0.311957	0.467	0.388	1.3403e-45
PAFAH1B1	AT1	1.21811e-49	0.377951	0.465	0.406	2.25837e-45
GOLGA3	AT1	1.27042e-49	0.337634	0.223	0.158	2.35535e-45
LRP10	AT1	1.49534e-49	0.341145	0.366	0.298	2.77236e-45
SLC39A7	AT1	1.5453e-49	0.339417	0.216	0.152	2.86498e-45
MRPS25	AT1	1.65706e-49	0.378976	0.224	0.161	3.07218e-45
PUM2	AT1	1.83995e-49	0.30813	0.268	0.196	3.41126e-45
NNT	AT1	1.94468e-49	0.269067	0.162	0.104	3.60544e-45
BAZ2B	AT1	4.84767e-49	0.405788	0.297	0.231	8.98757e-45
TMEM115	AT1	5.88896e-49	0.254852	0.154	0.098	1.09181e-44
TM7SF3	AT1	1.34323e-48	0.296593	0.185	0.125	2.49034e-44
KIAA0232	AT1	2.15314e-48	0.357785	0.257	0.188	3.99191e-44
LONP2	AT1	2.32218e-48	0.339729	0.259	0.191	4.30531e-44
SNX4	AT1	2.33373e-48	0.306522	0.198	0.137	4.32673e-44
NIPSNAP3A	AT1	2.95277e-48	0.288922	0.146	0.093	5.47443e-44
ARPP19	AT1	3.01759e-48	0.351859	0.416	0.351	5.59462e-44
LMAN1	AT1	8.94058e-48	0.364021	0.432	0.369	1.65758e-43
MYH9	AT1	1.65663e-47	0.304091	0.587	0.543	3.07139e-43
LUC7L	AT1	3.62482e-47	0.333011	0.29	0.218	6.72042e-43
KIDINS220	AT1	3.84332e-47	0.352851	0.3	0.231	7.12552e-43
MEAF6	AT1	6.26468e-47	0.36758	0.405	0.337	1.16147e-42
PDXDC1	AT1	8.19463e-47	0.310136	0.217	0.153	1.51929e-42
FOXJ3	AT1	8.3614e-47	0.308714	0.222	0.156	1.5502e-42
SLC33A1	AT1	9.02042e-47	0.281967	0.157	0.101	1.67239e-42
ERLIN2	AT1	1.02656e-46	0.275403	0.138	0.086	1.90325e-42
EHD1	AT1	2.80095e-46	0.271361	0.362	0.285	5.19295e-42
FOXK2	AT1	3.02083e-46	0.271231	0.163	0.106	5.60063e-42
ARAP1	AT1	3.36314e-46	0.362155	0.213	0.155	6.23526e-42
TMED4	AT1	4.66951e-46	0.36326	0.409	0.346	8.65727e-42
PHC3	AT1	1.12327e-45	0.251573	0.237	0.167	2.08254e-41
STAT6	AT1	1.68608e-45	0.365761	0.269	0.206	3.12599e-41
HSPA1B	AT1	2.8121e-45	0.533413	0.529	0.469	5.21363e-41
PDK4	AT1	2.82055e-45	0.347941	0.21	0.147	5.2293e-41
PINK1	AT1	5.31957e-45	0.264846	0.154	0.1	9.86249e-41
ENPP4	AT1	8.32488e-45	0.374887	0.251	0.19	1.54343e-40
SCAMP4	AT1	1.0529e-44	0.299676	0.229	0.164	1.95208e-40
PNISR	AT1	1.05442e-44	0.351296	0.58	0.528	1.95489e-40
HBA1	AT1	1.09313e-44	0.528316	0.145	0.089	2.02666e-40
RAB3GAP2	AT1	1.49632e-44	0.295652	0.21	0.148	2.77417e-40
ZMYM4	AT1	1.52051e-44	0.301931	0.184	0.126	2.81903e-40
PARP12	AT1	1.7083e-44	0.348153	0.201	0.144	3.16719e-40
RHOT1	AT1	1.97841e-44	0.348564	0.184	0.128	3.66797e-40
CYHR1	AT1	2.32201e-44	0.296991	0.2	0.14	4.30501e-40
APOL2	AT1	2.87787e-44	0.266433	0.141	0.089	5.33557e-40
RRBP1	AT1	3.40894e-44	0.392585	0.407	0.349	6.32017e-40
ZNF91	AT1	5.12417e-44	0.324401	0.23	0.165	9.50022e-40
ZBTB44	AT1	6.91937e-44	0.291012	0.275	0.205	1.28285e-39
WWP2	AT1	7.04661e-44	0.266625	0.16	0.106	1.30644e-39
USP47	AT1	7.09157e-44	0.318852	0.319	0.249	1.31478e-39
FARP2	AT1	1.01988e-43	0.261861	0.115	0.069	1.89085e-39
KLHDC2	AT1	1.07117e-43	0.273347	0.209	0.147	1.98595e-39
CNPPD1	AT1	1.28064e-43	0.275896	0.225	0.162	2.37431e-39
SLC35F5	AT1	1.30973e-43	0.294202	0.159	0.105	2.42824e-39
RBX1	AT1	2.36074e-43	0.364515	0.573	0.527	4.37681e-39
TTC7A	AT1	2.79399e-43	0.343369	0.183	0.128	5.18006e-39
HECTD1	AT1	3.43857e-43	0.331366	0.325	0.258	6.37511e-39
TMBIM1	AT1	3.57877e-43	0.373907	0.321	0.26	6.63503e-39
CDK10	AT1	4.04907e-43	0.250847	0.152	0.097	7.50698e-39
COQ4	AT1	5.3386e-43	0.296362	0.23	0.166	9.89777e-39
TMEM141	AT1	6.00662e-43	0.347424	0.268	0.208	1.11363e-38
TMEM9B	AT1	1.04394e-42	0.365353	0.351	0.292	1.93546e-38
ADPRHL2	AT1	1.81177e-42	0.322076	0.19	0.133	3.35901e-38
GNPTAB	AT1	2.33166e-42	0.267304	0.347	0.274	4.32289e-38
ARL16	AT1	2.49413e-42	0.360545	0.216	0.156	4.62412e-38
RBM26	AT1	2.50643e-42	0.34869	0.292	0.227	4.64691e-38
MON2	AT1	2.57893e-42	0.287095	0.198	0.139	4.78134e-38
FAM65A	AT1	2.78774e-42	0.292727	0.147	0.097	5.16848e-38
IPO7	AT1	3.00486e-42	0.395136	0.313	0.256	5.57101e-38
DHX30	AT1	3.76302e-42	0.309057	0.218	0.158	6.97665e-38
AHSA2	AT1	4.30605e-42	0.332032	0.232	0.168	7.98341e-38
ACTN1	AT1	4.73188e-42	0.347981	0.286	0.223	8.77291e-38
ZDHHC20	AT1	4.79296e-42	0.279442	0.152	0.099	8.88616e-38
HGS	AT1	6.71378e-42	0.301749	0.205	0.146	1.24474e-37
IFNGR2	AT1	6.77073e-42	0.321273	0.305	0.241	1.25529e-37
CHPT1	AT1	7.24897e-42	0.324313	0.246	0.186	1.34396e-37
RNPC3	AT1	1.02519e-41	0.302349	0.183	0.126	1.9007e-37
GPBP1L1	AT1	1.03638e-41	0.320311	0.292	0.229	1.92145e-37
SFSWAP	AT1	1.22618e-41	0.340925	0.274	0.21	2.27334e-37
NDUFA4	AT1	1.34965e-41	0.351523	0.718	0.696	2.50224e-37
SRSF10	AT1	1.5817e-41	0.351909	0.481	0.424	2.93247e-37
RAB11B	AT1	1.89952e-41	0.336179	0.321	0.259	3.52171e-37
ZBTB38	AT1	1.90748e-41	0.285749	0.347	0.278	3.53647e-37
OGDH	AT1	2.0404e-41	0.31562	0.235	0.175	3.7829e-37
CCP110	AT1	2.16657e-41	0.283523	0.149	0.097	4.01683e-37
FAM120A	AT1	3.97789e-41	0.366095	0.372	0.315	7.37501e-37
MBNL1	AT1	4.08687e-41	0.316357	0.686	0.666	7.57706e-37
FAM208B	AT1	4.57938e-41	0.285025	0.212	0.151	8.49016e-37
ZNF148	AT1	4.58214e-41	0.302741	0.326	0.261	8.49529e-37
DGKH	AT1	5.48954e-41	0.303208	0.155	0.103	1.01776e-36
CHMP5	AT1	5.70425e-41	0.350172	0.438	0.377	1.05757e-36
RDH14	AT1	5.99281e-41	0.303788	0.2	0.143	1.11107e-36
ATF4	AT1	7.08536e-41	0.362464	0.516	0.468	1.31363e-36
CHMP3	AT1	1.03357e-40	0.369489	0.354	0.299	1.91624e-36
TCF12	AT1	1.20299e-40	0.268634	0.181	0.125	2.23034e-36
KNOP1	AT1	1.38472e-40	0.264081	0.137	0.088	2.56727e-36
ABCC3	AT1	1.393e-40	0.398391	0.133	0.087	2.58261e-36
CDC16	AT1	1.40177e-40	0.257677	0.173	0.119	2.59888e-36
ARL2BP	AT1	1.71527e-40	0.338184	0.289	0.227	3.1801e-36
IPO5	AT1	2.92609e-40	0.283625	0.195	0.139	5.42497e-36
IMPA2	AT1	3.55161e-40	0.251744	0.13	0.083	6.58469e-36
LATS1	AT1	4.89567e-40	0.25646	0.165	0.111	9.07658e-36
CLN3.1	AT1	6.08018e-40	0.287176	0.217	0.158	1.12726e-35
MFN1	AT1	6.20885e-40	0.263185	0.169	0.116	1.15112e-35
HTT	AT1	8.23417e-40	0.31453	0.209	0.152	1.52662e-35
MLLT10	AT1	9.55902e-40	0.307116	0.198	0.141	1.77224e-35
RIF1	AT1	1.02815e-39	0.33639	0.296	0.233	1.90619e-35
LRRC58	AT1	1.31067e-39	0.296156	0.209	0.152	2.42997e-35
PRRC2B	AT1	1.35956e-39	0.308531	0.324	0.257	2.52062e-35
VPS35	AT1	2.02364e-39	0.367925	0.377	0.321	3.75182e-35
ARL5A	AT1	2.38037e-39	0.332576	0.383	0.326	4.41321e-35
RASSF4	AT1	2.73811e-39	0.327116	0.206	0.149	5.07645e-35
HDLBP	AT1	2.78076e-39	0.362168	0.329	0.272	5.15554e-35
CAND1	AT1	4.21343e-39	0.31035	0.303	0.238	7.81169e-35
ATP10A	AT1	5.51281e-39	0.271875	0.139	0.092	1.02208e-34
ESYT2	AT1	7.28159e-39	0.286324	0.281	0.217	1.35001e-34
EMC10	AT1	7.31427e-39	0.346305	0.281	0.225	1.35607e-34
HES1	AT1	7.43974e-39	0.302473	0.188	0.129	1.37933e-34
APPL1	AT1	8.50203e-39	0.349257	0.33	0.273	1.57628e-34
PCGF3	AT1	8.96791e-39	0.258101	0.141	0.092	1.66265e-34
STX17	AT1	9.06701e-39	0.254144	0.177	0.121	1.68102e-34
PRKAA1	AT1	1.24588e-38	0.262743	0.272	0.208	2.30986e-34
SMIM7	AT1	1.74778e-38	0.34392	0.324	0.268	3.24038e-34
TMCO3	AT1	8.37547e-38	0.264141	0.146	0.097	1.55281e-33
FLII	AT1	9.30711e-38	0.344341	0.264	0.21	1.72554e-33
GLT8D1	AT1	1.32357e-37	0.25325	0.164	0.112	2.45389e-33
GGCX	AT1	2.58365e-37	0.27666	0.177	0.124	4.79008e-33
ZMIZ2	AT1	2.71062e-37	0.269688	0.156	0.106	5.0255e-33
IRF2BP2	AT1	3.1427e-37	0.321193	0.423	0.362	5.82657e-33
HERC4	AT1	4.30144e-37	0.308604	0.242	0.184	7.97487e-33
HSBP1	AT1	4.47814e-37	0.299062	0.442	0.384	8.30247e-33
NEK7	AT1	4.76775e-37	0.290614	0.231	0.172	8.83941e-33
HMGCR	AT1	5.75846e-37	0.316937	0.199	0.144	1.06762e-32
ACTR1A	AT1	9.09524e-37	0.307724	0.219	0.164	1.68626e-32
TMX3	AT1	1.0704e-36	0.271271	0.215	0.158	1.98451e-32
SMC4	AT1	1.51071e-36	0.274133	0.221	0.161	2.80085e-32
UBAP1	AT1	2.56292e-36	0.311125	0.213	0.159	4.75165e-32
DNM2	AT1	3.34622e-36	0.349808	0.304	0.248	6.20389e-32
CCL2	AT1	4.44989e-36	0.801528	0.142	0.093	8.2501e-32
IBTK	AT1	4.86075e-36	0.328946	0.231	0.178	9.01183e-32
METAP2	AT1	8.84807e-36	0.369759	0.39	0.34	1.64043e-31
EFCAB4A	AT1	9.49928e-36	0.255041	0.103	0.063	1.76117e-31
NDUFS1	AT1	9.90613e-36	0.316967	0.219	0.166	1.8366e-31
KRIT1	AT1	1.1141e-35	0.309581	0.233	0.176	2.06555e-31
IP6K2	AT1	1.63692e-35	0.272444	0.241	0.183	3.03485e-31
HSD17B12	AT1	2.02224e-35	0.350888	0.289	0.236	3.74923e-31
MEF2A	AT1	2.93538e-35	0.336152	0.296	0.242	5.44219e-31
USP34	AT1	3.0094e-35	0.316439	0.383	0.323	5.57943e-31
ATP2A2	AT1	3.07994e-35	0.335575	0.321	0.266	5.71021e-31
C6orf89	AT1	3.14281e-35	0.297778	0.235	0.18	5.82677e-31
CLN5	AT1	3.30619e-35	0.317813	0.186	0.138	6.12967e-31
TMCO1	AT1	3.4164e-35	0.324955	0.461	0.415	6.33401e-31
UBA6	AT1	4.40616e-35	0.31193	0.257	0.202	8.16902e-31
EIF4A2	AT1	4.95632e-35	0.257108	0.657	0.642	9.18902e-31
RSBN1L	AT1	6.27266e-35	0.276134	0.359	0.295	1.16295e-30
TSPYL1	AT1	6.59072e-35	0.27657	0.307	0.245	1.22192e-30
RUNX1	AT1	1.03789e-34	0.398749	0.343	0.289	1.92425e-30
SHPRH	AT1	1.47747e-34	0.286479	0.185	0.132	2.73922e-30
ZNF37A	AT1	1.53023e-34	0.265228	0.156	0.108	2.83705e-30
HP1BP3	AT1	1.56123e-34	0.298896	0.524	0.48	2.89451e-30
BAZ1B	AT1	1.59061e-34	0.309116	0.271	0.214	2.949e-30
ANKRD11	AT1	1.68167e-34	0.309706	0.485	0.435	3.11781e-30
CNDP2	AT1	2.38098e-34	0.362731	0.306	0.256	4.41434e-30
MRPS36	AT1	2.49144e-34	0.359044	0.347	0.298	4.61913e-30
UPF1	AT1	2.65809e-34	0.272427	0.199	0.146	4.92809e-30
ANKRD17	AT1	3.40673e-34	0.306583	0.255	0.199	6.31608e-30
FBXL3	AT1	4.00804e-34	0.271814	0.225	0.169	7.4309e-30
CHD6	AT1	4.12219e-34	0.26317	0.253	0.192	7.64253e-30
DDRGK1	AT1	6.30067e-34	0.330696	0.317	0.266	1.16814e-29
ACTR10	AT1	6.35583e-34	0.316193	0.28	0.227	1.17837e-29
GINM1	AT1	8.63719e-34	0.346366	0.282	0.231	1.60133e-29
ZNF330	AT1	9.65498e-34	0.327125	0.226	0.175	1.79003e-29
PTPN12	AT1	1.44441e-33	0.264047	0.364	0.302	2.67794e-29
VPS13C	AT1	1.89128e-33	0.368863	0.467	0.426	3.50643e-29
VCP	AT1	3.37587e-33	0.340488	0.412	0.364	6.25886e-29
GNG5	AT1	4.64606e-33	0.266863	0.672	0.615	8.61379e-29
HINT3	AT1	5.82577e-33	0.281586	0.167	0.12	1.0801e-28
ZC3H11A	AT1	9.28477e-33	0.311371	0.346	0.292	1.7214e-28
JKAMP	AT1	9.99384e-33	0.288422	0.215	0.166	1.85286e-28
PEX2	AT1	1.00989e-32	0.31027	0.232	0.18	1.87233e-28
RC3H1	AT1	1.21899e-32	0.309317	0.269	0.214	2.26e-28
UBXN4	AT1	1.3892e-32	0.291216	0.536	0.502	2.57558e-28
NPLOC4	AT1	1.92669e-32	0.270938	0.197	0.147	3.57208e-28
KANSL1	AT1	2.3154e-32	0.267343	0.273	0.214	4.29274e-28
BLCAP	AT1	2.92912e-32	0.266509	0.185	0.137	5.43058e-28
PMM1	AT1	4.33114e-32	0.256017	0.161	0.113	8.02993e-28
PRPF8	AT1	7.09196e-32	0.322513	0.316	0.263	1.31485e-27
SMIM14	AT1	9.60108e-32	0.292802	0.334	0.283	1.78004e-27
RREB1	AT1	1.10295e-31	0.327506	0.185	0.138	2.04487e-27
PHLDA3	AT1	1.88881e-31	0.275421	0.195	0.143	3.50186e-27
FBXW11	AT1	2.58741e-31	0.276764	0.239	0.187	4.79705e-27
GFPT1	AT1	3.31327e-31	0.257698	0.224	0.171	6.1428e-27
AGFG1	AT1	5.68259e-31	0.321932	0.313	0.262	1.05355e-26
CORO1C	AT1	6.41436e-31	0.337591	0.269	0.214	1.18922e-26
WASH4P	AT1	7.27155e-31	0.288227	0.205	0.156	1.34815e-26
KAT6B	AT1	7.3583e-31	0.254019	0.275	0.215	1.36423e-26
[truncated: 17,800 more rows]
