# Supplementary material for: A single-cell transcriptomic atlas of the lungs of patients with pulmonary tuberculosis
Source: Research Square preprint supplement (doi:10.21203/rs.3.rs-2752256/v1), 2024-03-18
Supplement: Supplementary file 2 [file 27219096bb1f81a414eee85d.xlsx]

## Sheet: Table S3
Supplementary Table 3. The differentially expressed genes identified in bulk RNA-seq and scRNA-seq.
The Sheet1 shows DEGs between Tuberculosis and Control lungs in scRNA-seq
The Sheet2 shows DEGs between Tuberculosis and Control lungs in Bulk RNA-seq
The Sheet3 shows DEGs between human ECs with FOXO3 knockdown and Control ECs
The Sheet4 shows DEGs between human ECs with Thrombinn treatment and Control ECs
The Sheet5 shows DEGs between human ECs with p65KO and/or Thrombinn treatment and Control ECs

## Sheet: Sheet1
DEGs between Tuberculosis and Control lungs in scRNA-seq
gene	celltype	p_val	avg_log2FC	pct.1	pct.2	p_val_adj	group	type
ABCA3	AT1	1.61885e-57	-1.15186	0.074	0.293	3.00134e-53	AL-TB vs. Ctrl	Down-Down
ABCA3	AT1	1.76796e-64	-1.11123	0.081	0.293	3.27779e-60	L-TB vs. Ctrl	Down-Down
ABCA7	AT1	2.43572e-11	-0.270466	0.244	0.355	4.51583e-07	AL-TB vs. Ctrl	Down-Down
ABCC3	AT1	1.37682e-26	-0.46126	0.078	0.198	2.55263e-22	L-TB vs. Ctrl	Down-Down
ABHD2	AT1	3.64613e-15	-0.335184	0.445	0.572	6.75993e-11	L-TB vs. Ctrl	Down-Down
ABI3BP	AT1	7.04564e-23	-0.4532	0.221	0.389	1.30626e-18	AL-TB vs. Ctrl	Down-Down
ABI3BP	AT1	4.64271e-19	-0.381138	0.247	0.389	8.60758e-15	L-TB vs. Ctrl	Down-Down
ACAA1	AT1	1.0054e-11	-0.296902	0.244	0.36	1.86402e-07	AL-TB vs. Ctrl	Down-Down
ACACA	AT1	6.81983e-19	-0.266203	0.076	0.174	1.2644e-14	L-TB vs. Ctrl	Down-Down
ACADL	AT1	9.18647e-11	-0.255749	0.172	0.271	1.70317e-06	AL-TB vs. Ctrl	Other
ACADVL	AT1	6.14383e-14	-0.27393	0.304	0.428	1.13907e-09	L-TB vs. Ctrl	Down-Down
ACAT2	AT1	3.74309e-18	-0.348489	0.067	0.156	6.93969e-14	L-TB vs. Ctrl	Down-Down
ACAT2	AT1	7.83352e-13	-0.328759	0.075	0.156	1.45233e-08	AL-TB vs. Ctrl	Down-Down
ACBD3	AT1	8.67446e-11	-0.264843	0.318	0.428	1.60824e-06	L-TB vs. Ctrl	Down-Down
ACBD6	AT1	1.55866e-15	-0.252578	0.108	0.206	2.88975e-11	L-TB vs. Ctrl	Down-Down
ACLY	AT1	4.18453e-25	-0.363511	0.11	0.241	7.75813e-21	L-TB vs. Ctrl	Down-Down
ACLY	AT1	1.06765e-17	-0.376649	0.124	0.241	1.97942e-13	AL-TB vs. Ctrl	Down-Down
ACP5	AT1	1.66634e-12	-0.277221	0.138	0.231	3.08939e-08	L-TB vs. Ctrl	Down-Down
ACSL1	AT1	6.30638e-18	-0.372799	0.133	0.26	1.1692e-13	AL-TB vs. Ctrl	Down-Down
ACSL4	AT1	7.52434e-16	-0.359117	0.208	0.338	1.39501e-11	AL-TB vs. Ctrl	Down-Down
ACSL4	AT1	1.17621e-18	-0.344365	0.207	0.338	2.18069e-14	L-TB vs. Ctrl	Down-Down
ACSS2	AT1	2.91019e-12	-0.263002	0.092	0.178	5.39549e-08	AL-TB vs. Ctrl	Down-Down
ACTB	AT1	9.87436e-41	0.373909	0.994	0.978	1.83071e-36	L-TB vs. Ctrl	Up-Up
ACTB	AT1	6.83265e-50	0.471872	0.988	0.978	1.26677e-45	AL-TB vs. Ctrl	Up-Up
ACTG1	AT1	8.15744e-82	0.71134	0.968	0.928	1.51239e-77	AL-TB vs. Ctrl	Up-Up
ACTG1	AT1	1.39479e-56	0.537555	0.958	0.928	2.58594e-52	L-TB vs. Ctrl	Up-Up
ACTN1	AT1	7.41717e-14	-0.256546	0.232	0.351	1.37514e-09	L-TB vs. Ctrl	Down-Down
ACTR2	AT1	1.57258e-32	-0.548664	0.381	0.549	2.91556e-28	L-TB vs. Ctrl	Down-Down
ACTR2	AT1	3.05057e-24	-0.535276	0.396	0.549	5.65576e-20	AL-TB vs. Ctrl	Down-Down
ADAM10	AT1	1.24668e-18	-0.34335	0.316	0.464	2.31135e-14	L-TB vs. Ctrl	Down-Down
ADAM10	AT1	1.10559e-09	-0.261327	0.359	0.464	2.04977e-05	AL-TB vs. Ctrl	Down-Down
ADAM9	AT1	5.62775e-29	-0.516052	0.247	0.436	1.04338e-24	AL-TB vs. Ctrl	Down-Down
ADAM9	AT1	5.2694e-39	-0.550424	0.235	0.436	9.76947e-35	L-TB vs. Ctrl	Down-Down
ADAR	AT1	1.98502e-12	-0.284867	0.34	0.457	3.68023e-08	L-TB vs. Ctrl	Other
ADD1	AT1	1.56153e-17	-0.30713	0.404	0.547	2.89508e-13	L-TB vs. Ctrl	Down-Down
ADIRF	AT1	4.12583e-07	0.334217	0.782	0.731	0.00764929	L-TB vs. Ctrl	Up-Up
ADK	AT1	2.28038e-10	-0.253915	0.24	0.344	4.22783e-06	AL-TB vs. Ctrl	Down-Down
ADK	AT1	3.81765e-18	-0.324159	0.213	0.344	7.07793e-14	L-TB vs. Ctrl	Down-Down
ADSS	AT1	1.28265e-08	-0.263688	0.242	0.325	0.000237803	L-TB vs. Ctrl	Down-Down
ADSS	AT1	2.52779e-09	-0.271038	0.23	0.325	4.68651e-05	AL-TB vs. Ctrl	Down-Down
AGFG1	AT1	1.78845e-17	-0.337052	0.263	0.399	3.31578e-13	L-TB vs. Ctrl	Down-Down
AGFG1	AT1	1.03707e-12	-0.288415	0.274	0.399	1.92273e-08	AL-TB vs. Ctrl	Down-Down
AGO4	AT1	2.67599e-09	-0.25723	0.109	0.185	4.96128e-05	AL-TB vs. Ctrl	Down-Down
AGPAT2	AT1	4.25132e-09	-0.259011	0.306	0.412	7.88195e-05	AL-TB vs. Ctrl	Down-Down
AGPAT2	AT1	8.90519e-17	-0.341168	0.278	0.412	1.65102e-12	L-TB vs. Ctrl	Down-Down
AGPAT3	AT1	3.41782e-14	-0.275441	0.131	0.238	6.33663e-10	AL-TB vs. Ctrl	Other
AGPAT3	AT1	5.9989e-17	-0.260745	0.129	0.238	1.1122e-12	L-TB vs. Ctrl	Other
AGR3	AT1	1.89643e-42	1.04438	0.538	0.354	3.51599e-38	AL-TB vs. Ctrl	Up-Up
AGR3	AT1	5.21116e-07	0.609858	0.4	0.354	0.0096615	L-TB vs. Ctrl	Up-Up
AGR3	AT1	8.22187e-18	-0.434521	0.4	0.538	1.52433e-13	L-TB vs. AL-TB	Up-Up
AGTPBP1	AT1	3.87644e-14	-0.332263	0.226	0.358	7.18693e-10	AL-TB vs. Ctrl	Down-Down
AGTPBP1	AT1	3.86687e-11	-0.2816	0.248	0.358	7.16917e-07	L-TB vs. Ctrl	Down-Down
AHCTF1	AT1	4.64132e-13	-0.273775	0.147	0.241	8.605e-09	L-TB vs. Ctrl	Down-Down
AHNAK	AT1	4.58358e-22	-0.321598	0.797	0.858	8.49795e-18	L-TB vs. Ctrl	Down-Down
AHR	AT1	8.48268e-26	0.582492	0.661	0.546	1.57269e-21	L-TB vs. Ctrl	Up-Up
AHR	AT1	1.40744e-10	0.405695	0.614	0.546	2.60939e-06	AL-TB vs. Ctrl	Up-Up
AIDA	AT1	8.80074e-13	-0.275068	0.153	0.257	1.63166e-08	AL-TB vs. Ctrl	Down-Down
AIM1	AT1	7.87336e-07	0.251217	0.179	0.124	0.0145972	L-TB vs. Ctrl	Other
AK1	AT1	2.04023e-18	-0.400184	0.285	0.416	3.78259e-14	L-TB vs. Ctrl	Down-Down
AK1	AT1	6.23215e-11	-0.354694	0.312	0.416	1.15544e-06	AL-TB vs. Ctrl	Down-Down
AKAP1	AT1	9.15214e-20	-0.338775	0.11	0.233	1.69681e-15	AL-TB vs. Ctrl	Down-Down
AKAP1	AT1	7.21206e-15	-0.258129	0.134	0.233	1.33712e-10	L-TB vs. Ctrl	Down-Down
AKAP11	AT1	4.68584e-14	-0.318521	0.187	0.304	8.68755e-10	AL-TB vs. Ctrl	Down-Down
AKR1C3	AT1	5.38784e-08	-0.330517	0.207	0.284	0.000998905	AL-TB vs. Ctrl	Down-Down
AKR1C3	AT1	1.05689e-09	-0.326277	0.201	0.284	1.95947e-05	L-TB vs. Ctrl	Down-Down
ALAS1	AT1	8.12694e-15	-0.261607	0.118	0.216	1.50673e-10	L-TB vs. Ctrl	Down-Down
ALCAM	AT1	2.78311e-40	-0.579659	0.758	0.838	5.15989e-36	L-TB vs. Ctrl	Down-Down
ALCAM	AT1	1.59032e-32	-0.539947	0.757	0.838	2.94846e-28	AL-TB vs. Ctrl	Down-Down
ALPL	AT1	4.41304e-30	-0.360679	0.018	0.108	8.18177e-26	L-TB vs. Ctrl	Down-Down
ALPL	AT1	2.03478e-15	-0.301884	0.035	0.108	3.77248e-11	AL-TB vs. Ctrl	Down-Down
ALPP	AT1	1.86468e-17	-0.26906	0.031	0.1	3.45713e-13	L-TB vs. Ctrl	Down-Down
ALPP	AT1	9.28844e-18	-0.292141	0.024	0.1	1.72208e-13	AL-TB vs. Ctrl	Down-Down
ALS2CL	AT1	7.89826e-10	-0.342677	0.251	0.354	1.46434e-05	AL-TB vs. Ctrl	Other
AMOTL2	AT1	5.92242e-27	-0.552477	0.306	0.488	1.09802e-22	AL-TB vs. Ctrl	Down-Down
AMOTL2	AT1	5.26878e-22	-0.485459	0.34	0.488	9.76833e-18	L-TB vs. Ctrl	Down-Down
ANKLE2	AT1	1.35708e-28	-0.59734	0.29	0.452	2.51603e-24	L-TB vs. Ctrl	Down-Down
ANKLE2	AT1	5.72984e-14	-0.416599	0.29	0.401	1.06231e-09	L-TB vs. AL-TB	Down-Down
ANKRD11	AT1	2.41569e-12	-0.405028	0.455	0.559	4.47869e-08	AL-TB vs. Ctrl	Down-Down
ANKRD11	AT1	9.23468e-17	-0.43911	0.439	0.559	1.71211e-12	L-TB vs. Ctrl	Down-Down
ANKRD13A	AT1	1.05778e-10	-0.251873	0.269	0.382	1.96112e-06	AL-TB vs. Ctrl	Down-Down
ANKRD13A	AT1	2.41785e-16	-0.326145	0.251	0.382	4.48269e-12	L-TB vs. Ctrl	Down-Down
ANKRD40	AT1	1.97518e-11	-0.267023	0.128	0.22	3.66198e-07	AL-TB vs. Ctrl	Other
ANO6	AT1	4.37186e-39	-0.580616	0.286	0.493	8.10543e-35	L-TB vs. Ctrl	Down-Down
ANO6	AT1	1.30389e-19	-0.425178	0.338	0.493	2.41742e-15	AL-TB vs. Ctrl	Down-Down
ANXA1	AT1	7.16234e-70	0.991671	0.885	0.788	1.3279e-65	AL-TB vs. Ctrl	Up-Up
ANXA1	AT1	9.89357e-80	1.20223	0.876	0.788	1.83427e-75	L-TB vs. Ctrl	Up-Up
ANXA11	AT1	3.27919e-08	-0.288119	0.542	0.603	0.000607961	L-TB vs. AL-TB	Down-Down
ANXA11	AT1	1.28238e-08	-0.252906	0.542	0.611	0.000237753	L-TB vs. Ctrl	Down-Down
ANXA5	AT1	1.20838e-19	-0.393987	0.562	0.67	2.24034e-15	L-TB vs. Ctrl	Down-Down
ANXA7	AT1	1.88291e-09	-0.253947	0.288	0.383	3.49091e-05	L-TB vs. Ctrl	Down-Down
AP2M1	AT1	1.01783e-10	-0.252677	0.279	0.38	1.88705e-06	L-TB vs. Ctrl	Down-Down
AP3D1	AT1	1.43486e-29	-0.470476	0.147	0.3	2.66023e-25	L-TB vs. Ctrl	Down-Down
AP3D1	AT1	1.70942e-17	-0.390787	0.172	0.3	3.16926e-13	AL-TB vs. Ctrl	Down-Down
APBB2	AT1	1.57507e-17	-0.396535	0.248	0.386	2.92019e-13	AL-TB vs. Ctrl	Down-Down
APBB2	AT1	5.954e-27	-0.501148	0.229	0.386	1.10387e-22	L-TB vs. Ctrl	Down-Down
APLP2	AT1	7.14277e-20	-0.311222	0.876	0.895	1.32427e-15	AL-TB vs. Ctrl	Down-Down
APLP2	AT1	3.25811e-44	-0.477438	0.864	0.895	6.04054e-40	L-TB vs. Ctrl	Down-Down
APOC1	AT1	3.38431e-20	-0.453708	0.276	0.422	6.27451e-16	L-TB vs. Ctrl	Down-Down
APOE	AT1	7.84952e-12	-0.361329	0.24	0.345	1.4553e-07	L-TB vs. Ctrl	Down-Down
APOL2	AT1	1.67721e-10	-0.274845	0.112	0.196	3.10954e-06	AL-TB vs. Ctrl	Down-Down
APOL2	AT1	3.38716e-12	-0.261374	0.112	0.196	6.27979e-08	L-TB vs. Ctrl	Down-Down
APOL6	AT1	4.20164e-35	-0.60056	0.271	0.461	7.78985e-31	L-TB vs. Ctrl	Down-Down
APOL6	AT1	1.06472e-22	-0.505297	0.298	0.461	1.97398e-18	AL-TB vs. Ctrl	Down-Down
AQP1	AT1	1.9547e-92	-1.57171	0.168	0.455	3.62401e-88	L-TB vs. Ctrl	Down-Down
AQP1	AT1	7.14625e-48	-1.14226	0.23	0.455	1.32491e-43	AL-TB vs. Ctrl	Down-Down
AQP1	AT1	1.49837e-06	-0.429453	0.168	0.23	0.0277798	L-TB vs. AL-TB	Down-Down
AQP3	AT1	7.58478e-10	0.363889	0.176	0.103	1.40622e-05	AL-TB vs. Ctrl	Other
AQP3	AT1	3.8528e-11	0.458429	0.175	0.103	7.1431e-07	L-TB vs. Ctrl	Other
AQP4	AT1	8.76445e-25	-0.419653	0.727	0.837	1.62493e-20	L-TB vs. Ctrl	Down-Down
AQP4	AT1	4.13895e-16	-0.389648	0.766	0.837	7.67362e-12	AL-TB vs. Ctrl	Down-Down
ARF6	AT1	2.23455e-14	0.354976	0.375	0.277	4.14285e-10	L-TB vs. Ctrl	Up-Up
ARF6	AT1	9.37859e-11	0.318155	0.367	0.277	1.73879e-06	AL-TB vs. Ctrl	Up-Up
ARFGEF1	AT1	7.41533e-17	-0.283379	0.187	0.311	1.3748e-12	L-TB vs. Ctrl	Down-Down
ARHGAP18	AT1	8.36501e-09	-0.264611	0.201	0.281	0.000155087	L-TB vs. Ctrl	Down-Down
ARHGAP21	AT1	1.16252e-19	-0.392795	0.298	0.443	2.15531e-15	L-TB vs. Ctrl	Down-Down
ARHGAP21	AT1	2.04702e-10	-0.28125	0.327	0.443	3.79518e-06	AL-TB vs. Ctrl	Down-Down
ARHGAP35	AT1	2.91597e-13	-0.321559	0.226	0.341	5.40621e-09	AL-TB vs. Ctrl	Down-Down
ARHGAP44	AT1	3.59803e-14	-0.289142	0.233	0.354	6.67075e-10	L-TB vs. Ctrl	Other
ARHGAP5	AT1	3.69505e-09	-0.254553	0.49	0.576	6.85062e-05	L-TB vs. Ctrl	Other
ARHGDIB	AT1	3.79698e-36	0.735232	0.354	0.182	7.0396e-32	L-TB vs. Ctrl	Up-Up
ARHGDIB	AT1	1.40782e-13	0.60402	0.278	0.182	2.6101e-09	AL-TB vs. Ctrl	Up-Up
ARHGEF26	AT1	9.94598e-15	-0.36998	0.609	0.718	1.84399e-10	AL-TB vs. Ctrl	Other
ARHGEF26	AT1	7.57554e-12	-0.302377	0.629	0.718	1.4045e-07	L-TB vs. Ctrl	Other
ARID5A	AT1	3.32402e-15	0.304191	0.139	0.062	6.16273e-11	L-TB vs. Ctrl	Up-Up
ARID5A	AT1	5.09487e-12	0.272077	0.132	0.062	9.44588e-08	AL-TB vs. Ctrl	Up-Up
ARL4A	AT1	9.98775e-26	0.475616	0.286	0.148	1.85173e-21	L-TB vs. Ctrl	Up-Up
ARL4A	AT1	1.05428e-15	0.375089	0.258	0.148	1.95463e-11	AL-TB vs. Ctrl	Up-Up
ARL6IP5	AT1	4.98462e-10	-0.328694	0.57	0.624	9.24149e-06	L-TB vs. AL-TB	Down-Down
ARL8B	AT1	2.53925e-19	-0.339353	0.321	0.465	4.70776e-15	L-TB vs. Ctrl	Down-Down
ARL8B	AT1	1.19355e-11	-0.283763	0.347	0.465	2.21284e-07	AL-TB vs. Ctrl	Down-Down
ARPC1B	AT1	1.83575e-10	-0.25107	0.474	0.569	3.40348e-06	L-TB vs. Ctrl	Down-Down
ARPC5L	AT1	5.37851e-07	-0.255272	0.351	0.437	0.00997176	AL-TB vs. Ctrl	Down-Down
ARPC5L	AT1	2.27958e-16	-0.418375	0.315	0.437	4.22634e-12	L-TB vs. Ctrl	Down-Down
ASAH1	AT1	2.61075e-21	-0.368739	0.711	0.789	4.84033e-17	AL-TB vs. Ctrl	Down-Down
ASAH1	AT1	8.68125e-38	-0.468348	0.669	0.789	1.6095e-33	L-TB vs. Ctrl	Down-Down
ASCC3	AT1	4.37819e-20	-0.335883	0.18	0.312	8.11717e-16	L-TB vs. Ctrl	Down-Down
ASCC3	AT1	7.92194e-17	-0.32403	0.181	0.312	1.46873e-12	AL-TB vs. Ctrl	Down-Down
ASPH	AT1	1.30106e-25	-0.50884	0.307	0.484	2.41216e-21	AL-TB vs. Ctrl	Down-Down
ASPH	AT1	2.74496e-28	-0.498833	0.319	0.484	5.08915e-24	L-TB vs. Ctrl	Down-Down
ATAD1	AT1	3.20359e-12	-0.329947	0.222	0.332	5.93946e-08	AL-TB vs. Ctrl	Down-Down
ATAD1	AT1	8.47367e-14	-0.372232	0.227	0.332	1.57102e-09	L-TB vs. Ctrl	Down-Down
ATF3	AT1	1.12818e-110	1.34185	0.726	0.382	2.09165e-106	AL-TB vs. Ctrl	Up-Up
ATF3	AT1	1.34357e-183	1.69258	0.783	0.382	2.49098e-179	L-TB vs. Ctrl	Up-Up
ATF3	AT1	4.27321e-13	0.350728	0.783	0.726	7.92254e-09	L-TB vs. AL-TB	Up-Up
ATHL1	AT1	1.10957e-18	0.700091	0.338	0.226	2.05714e-14	L-TB vs. Ctrl	Up-Up
ATL3	AT1	1.06441e-25	-0.434327	0.248	0.409	1.97341e-21	L-TB vs. Ctrl	Down-Down
ATL3	AT1	6.07341e-19	-0.393524	0.265	0.409	1.12601e-14	AL-TB vs. Ctrl	Down-Down
ATOH8	AT1	2.08312e-08	-0.298612	0.281	0.383	0.000386211	AL-TB vs. Ctrl	Other
ATP11A	AT1	1.94703e-30	-0.551707	0.539	0.694	3.60979e-26	AL-TB vs. Ctrl	Down-Down
ATP11A	AT1	2.22319e-39	-0.588239	0.518	0.694	4.1218e-35	L-TB vs. Ctrl	Down-Down
ATP13A3	AT1	2.23464e-12	-0.298526	0.261	0.377	4.14301e-08	AL-TB vs. Ctrl	Down-Down
ATP13A3	AT1	7.08668e-12	-0.269731	0.269	0.377	1.31387e-07	L-TB vs. Ctrl	Down-Down
ATP13A4	AT1	8.193e-18	-0.412516	0.382	0.513	1.51898e-13	L-TB vs. Ctrl	Down-Down
ATP13A4	AT1	1.06411e-25	-0.525145	0.335	0.513	1.97285e-21	AL-TB vs. Ctrl	Down-Down
ATP1A1	AT1	1.91606e-18	-0.411658	0.778	0.795	3.55237e-14	AL-TB vs. Ctrl	Other
ATP1A1	AT1	3.103e-21	-0.405943	0.773	0.795	5.75297e-17	L-TB vs. Ctrl	Other
ATP1B1	AT1	1.73957e-11	-0.342116	0.624	0.717	3.22517e-07	AL-TB vs. Ctrl	Down-Down
ATP1B1	AT1	2.68003e-30	-0.56047	0.579	0.717	4.96877e-26	L-TB vs. Ctrl	Down-Down
ATP1B3	AT1	1.69949e-13	-0.354327	0.408	0.534	3.15086e-09	AL-TB vs. Ctrl	Down-Down
ATP1B3	AT1	1.1369e-14	-0.361881	0.405	0.534	2.1078e-10	L-TB vs. Ctrl	Down-Down
ATP2B4	AT1	6.57891e-20	-0.454908	0.411	0.562	1.21973e-15	AL-TB vs. Ctrl	Down-Down
ATP2B4	AT1	1.05201e-40	-0.65886	0.364	0.562	1.95042e-36	L-TB vs. Ctrl	Down-Down
ATP2C2	AT1	2.35438e-26	-0.413931	0.106	0.258	4.36502e-22	AL-TB vs. Ctrl	Down-Down
ATP2C2	AT1	7.1629e-35	-0.51089	0.102	0.258	1.328e-30	L-TB vs. Ctrl	Down-Down
ATP5A1	AT1	3.37505e-13	-0.337112	0.36	0.482	6.25733e-09	AL-TB vs. Ctrl	Other
ATP5A1	AT1	1.82588e-13	-0.30715	0.366	0.482	3.38519e-09	L-TB vs. Ctrl	Other
ATP5E	AT1	1.39233e-22	-0.424334	0.796	0.848	2.58139e-18	AL-TB vs. Ctrl	Other
ATP5E	AT1	1.22133e-14	-0.337648	0.834	0.848	2.26434e-10	L-TB vs. Ctrl	Other
ATP5G2	AT1	1.38039e-14	0.342011	0.616	0.543	2.55924e-10	L-TB vs. Ctrl	Up-Up
ATP5I	AT1	1.32631e-12	-0.344905	0.485	0.595	2.45897e-08	AL-TB vs. Ctrl	Up-Up
ATP5I	AT1	4.58234e-08	0.262624	0.57	0.485	0.000849566	L-TB vs. AL-TB	Up-Up
ATP5O	AT1	1.07893e-11	0.3234	0.506	0.416	2.00034e-07	AL-TB vs. Ctrl	Other
ATP5O	AT1	2.73015e-08	0.260171	0.486	0.416	0.00050617	L-TB vs. Ctrl	Other
ATP6V1A	AT1	5.65492e-16	-0.295952	0.147	0.266	1.04842e-11	AL-TB vs. Ctrl	Down-Down
ATP6V1A	AT1	1.96619e-16	-0.265518	0.153	0.266	3.64532e-12	L-TB vs. Ctrl	Down-Down
ATP6V1E1	AT1	3.63152e-12	-0.268565	0.278	0.395	6.73285e-08	AL-TB vs. Ctrl	Down-Down
ATP6V1E1	AT1	2.58733e-12	-0.259157	0.286	0.395	4.79691e-08	L-TB vs. Ctrl	Down-Down
ATP8A1	AT1	6.39236e-13	-0.286533	0.142	0.247	1.18514e-08	AL-TB vs. Ctrl	Down-Down
ATXN2	AT1	1.58567e-12	-0.301936	0.392	0.51	2.93982e-08	L-TB vs. Ctrl	Down-Down
B2M	AT1	3.61744e-66	0.7101	0.995	0.994	6.70673e-62	AL-TB vs. Ctrl	Up-Up
B2M	AT1	1.44584e-87	0.617794	0.997	0.994	2.68059e-83	L-TB vs. Ctrl	Up-Up
B4GALT1	AT1	2.23632e-11	-0.388787	0.408	0.498	4.14613e-07	L-TB vs. Ctrl	Up-Up
BANF1	AT1	1.90674e-11	0.343114	0.439	0.346	3.5351e-07	AL-TB vs. Ctrl	Up-Up
BANF1	AT1	4.6071e-09	0.303167	0.421	0.346	8.54156e-05	L-TB vs. Ctrl	Up-Up
BATF	AT1	6.30541e-19	0.413825	0.102	0.03	1.16902e-14	L-TB vs. Ctrl	Up-Up
BAZ2A	AT1	2.49403e-13	-0.322307	0.274	0.396	4.62394e-09	AL-TB vs. Ctrl	Other
BCAM	AT1	3.36363e-08	0.308084	0.61	0.565	0.000623617	AL-TB vs. Ctrl	Other
BCAM	AT1	2.37459e-08	0.292355	0.61	0.565	0.00044025	L-TB vs. Ctrl	Other
BCAP29	AT1	1.23765e-15	-0.3167	0.289	0.42	2.2946e-11	L-TB vs. Ctrl	Down-Down
BCAP29	AT1	1.74612e-10	-0.303989	0.31	0.42	3.23731e-06	AL-TB vs. Ctrl	Down-Down
BCAS2	AT1	5.61433e-08	0.276566	0.228	0.166	0.0010409	L-TB vs. Ctrl	Up-Up
BCL2A1	AT1	7.85243e-10	0.277767	0.251	0.161	1.45584e-05	L-TB vs. AL-TB	Up-Up
BCL2L1	AT1	3.45981e-23	-0.480106	0.316	0.48	6.41449e-19	AL-TB vs. Ctrl	Down-Down
BCL2L1	AT1	6.27055e-35	-0.55495	0.289	0.48	1.16256e-30	L-TB vs. Ctrl	Down-Down
BCL3	AT1	5.6197e-23	0.51441	0.265	0.133	1.04189e-18	AL-TB vs. Ctrl	Up-Up
BCL3	AT1	3.81856e-07	-0.317389	0.2	0.265	0.00707961	L-TB vs. AL-TB	Up-Up
BCL9L	AT1	7.34668e-12	-0.335821	0.195	0.3	1.36208e-07	AL-TB vs. Ctrl	Down-Down
BCL9L	AT1	6.17472e-32	-0.569955	0.143	0.3	1.14479e-27	L-TB vs. Ctrl	Down-Down
BCO2	AT1	2.32442e-07	0.377567	0.16	0.102	0.00430947	AL-TB vs. Ctrl	Up-Up
BDP1	AT1	3.5497e-08	-0.253106	0.304	0.398	0.000658115	AL-TB vs. Ctrl	Other
BEND7	AT1	3.71801e-16	-0.283919	0.09	0.183	6.8932e-12	L-TB vs. Ctrl	Down-Down
BFAR	AT1	4.41909e-10	-0.284281	0.262	0.356	8.19299e-06	L-TB vs. Ctrl	Down-Down
BFAR	AT1	5.94291e-10	-0.283685	0.257	0.356	1.10182e-05	AL-TB vs. Ctrl	Down-Down
BHLHE40	AT1	3.27556e-15	0.547591	0.29	0.186	6.0729e-11	AL-TB vs. Ctrl	Other
BHLHE40	AT1	5.84117e-07	-0.346479	0.222	0.29	0.0108295	L-TB vs. AL-TB	Other
BLCAP	AT1	1.75575e-11	-0.257358	0.157	0.245	3.25516e-07	L-TB vs. Ctrl	Down-Down
BLCAP	AT1	3.24955e-11	-0.258873	0.15	0.245	6.02467e-07	AL-TB vs. Ctrl	Down-Down
BLVRB	AT1	4.4328e-09	-0.264537	0.499	0.6	8.21841e-05	AL-TB vs. Ctrl	Down-Down
BMP2	AT1	1.45688e-10	-0.374983	0.14	0.219	2.70105e-06	L-TB vs. Ctrl	Other
BNIP2	AT1	1.19961e-11	-0.33863	0.263	0.376	2.22408e-07	AL-TB vs. Ctrl	Down-Down
BNIP2	AT1	1.22526e-11	-0.28236	0.271	0.376	2.27164e-07	L-TB vs. Ctrl	Down-Down
BOD1L1	AT1	7.0883e-13	-0.257106	0.302	0.429	1.31417e-08	AL-TB vs. Ctrl	Down-Down
BOK	AT1	3.53116e-23	-0.272208	0.077	0.191	6.54677e-19	L-TB vs. Ctrl	Down-Down
BPIFB1	AT1	1.32408e-16	0.350532	0.166	0.078	2.45485e-12	L-TB vs. Ctrl	Up-Up
BRD2	AT1	2.72284e-16	0.405156	0.528	0.426	5.04814e-12	L-TB vs. Ctrl	Up-Up
BRD2	AT1	1.96351e-07	0.308097	0.488	0.426	0.00364036	AL-TB vs. Ctrl	Up-Up
BRI3	AT1	3.18857e-19	-0.338045	0.674	0.766	5.9116e-15	AL-TB vs. Ctrl	Other
BRI3	AT1	1.19837e-19	-0.3317	0.702	0.766	2.22178e-15	L-TB vs. Ctrl	Other
BST2	AT1	5.72986e-30	0.969105	0.349	0.187	1.06232e-25	AL-TB vs. Ctrl	Up-Up
BST2	AT1	9.43248e-19	0.664606	0.302	0.187	1.74878e-14	L-TB vs. Ctrl	Up-Up
BTF3	AT1	6.4499e-11	0.299385	0.672	0.626	1.19581e-06	AL-TB vs. Ctrl	Up-Up
BTF3	AT1	1.47171e-21	0.427242	0.693	0.626	2.72856e-17	L-TB vs. Ctrl	Up-Up
BTG1	AT1	1.25102e-107	1.32605	0.769	0.52	2.3194e-103	L-TB vs. Ctrl	Up-Up
BTG1	AT1	2.96137e-39	0.979078	0.677	0.52	5.49039e-35	AL-TB vs. Ctrl	Up-Up
BTG1	AT1	2.27125e-14	0.346975	0.769	0.677	4.21089e-10	L-TB vs. AL-TB	Up-Up
BTG2	AT1	3.11678e-17	0.606132	0.594	0.498	5.7785e-13	AL-TB vs. Ctrl	Up-Up
BTG2	AT1	2.43957e-49	0.842004	0.662	0.498	4.52297e-45	L-TB vs. Ctrl	Up-Up
C12orf57	AT1	6.30367e-09	0.334617	0.388	0.325	0.00011687	L-TB vs. Ctrl	Up-Up
C12orf75	AT1	5.02485e-14	0.337519	0.146	0.066	9.31607e-10	AL-TB vs. Ctrl	Up-Up
C14orf132	AT1	4.02764e-29	-0.553037	0.172	0.344	7.46725e-25	AL-TB vs. Ctrl	Down-Down
C14orf132	AT1	5.6848e-39	-0.591359	0.158	0.344	1.05396e-34	L-TB vs. Ctrl	Down-Down
C19orf43	AT1	1.31393e-09	0.277174	0.522	0.457	2.43602e-05	L-TB vs. Ctrl	Up-Up
C19orf70	AT1	7.38686e-13	-0.313113	0.328	0.437	1.36952e-08	L-TB vs. Ctrl	Down-Down
C19orf70	AT1	2.8887e-14	-0.398275	0.314	0.437	5.35566e-10	AL-TB vs. Ctrl	Down-Down
C1orf116	AT1	1.09451e-15	-0.347823	0.387	0.528	2.02922e-11	AL-TB vs. Ctrl	Down-Down
C1orf116	AT1	1.06476e-23	-0.455925	0.379	0.528	1.97406e-19	L-TB vs. Ctrl	Down-Down
C1QA	AT1	2.99914e-08	-0.319294	0.285	0.388	0.00055604	AL-TB vs. Ctrl	Down-Down
C1QA	AT1	1.83406e-17	-0.451169	0.247	0.388	3.40036e-13	L-TB vs. Ctrl	Down-Down
C1QB	AT1	7.55305e-31	-0.520168	0.207	0.39	1.40034e-26	L-TB vs. Ctrl	Down-Down
C1QB	AT1	4.62903e-19	-0.426503	0.235	0.39	8.58223e-15	AL-TB vs. Ctrl	Down-Down
C2orf54	AT1	1.24461e-08	-0.338416	0.203	0.283	0.00023075	L-TB vs. AL-TB	Other
C3	AT1	5.47308e-26	-0.824642	0.083	0.214	1.01471e-21	AL-TB vs. Ctrl	Down-Down
C3	AT1	9.74502e-35	-0.91638	0.078	0.214	1.80673e-30	L-TB vs. Ctrl	Down-Down
C3orf52	AT1	2.50136e-13	-0.278637	0.161	0.261	4.63752e-09	L-TB vs. Ctrl	Down-Down
C3orf58	AT1	5.44291e-16	0.575721	0.331	0.222	1.00912e-11	AL-TB vs. Ctrl	Up-Up
C4BPA	AT1	2.08611e-19	0.704844	0.312	0.176	3.86764e-15	L-TB vs. AL-TB	Up-Up
C5orf42	AT1	2.99854e-13	-0.341314	0.236	0.353	5.55929e-09	AL-TB vs. Ctrl	Other
C6orf120	AT1	8.13042e-20	-0.285244	0.092	0.199	1.50738e-15	L-TB vs. Ctrl	Down-Down
C6orf132	AT1	2.8162e-09	-0.371173	0.134	0.21	5.22124e-05	L-TB vs. AL-TB	Down-Down
C6orf89	AT1	2.80104e-15	-0.270278	0.192	0.305	5.19312e-11	L-TB vs. Ctrl	Down-Down
C8orf4	AT1	3.35891e-09	0.434575	0.102	0.048	6.22743e-05	AL-TB vs. Ctrl	Other
C8orf4	AT1	3.63923e-08	-0.466012	0.053	0.102	0.000674713	L-TB vs. AL-TB	Other
CACYBP	AT1	3.77063e-08	0.355908	0.342	0.271	0.000699076	AL-TB vs. Ctrl	Up-Up
CALR	AT1	5.36922e-13	-0.359608	0.608	0.713	9.95454e-09	AL-TB vs. Ctrl	Down-Down
CALR	AT1	7.15507e-29	-0.50341	0.576	0.713	1.32655e-24	L-TB vs. Ctrl	Down-Down
CALU	AT1	3.56043e-17	-0.258902	0.202	0.329	6.60104e-13	L-TB vs. Ctrl	Down-Down
CAMK2G	AT1	3.15838e-08	-0.255903	0.14	0.217	0.000585563	AL-TB vs. Ctrl	Other
CANX	AT1	1.17639e-29	-0.530776	0.411	0.571	2.18103e-25	L-TB vs. Ctrl	Down-Down
CANX	AT1	1.80436e-21	-0.443702	0.417	0.571	3.34529e-17	AL-TB vs. Ctrl	Down-Down
CAP1	AT1	1.19259e-09	-0.305791	0.46	0.556	2.21105e-05	AL-TB vs. Ctrl	Other
CAP1	AT1	3.58339e-15	-0.383648	0.448	0.556	6.6436e-11	L-TB vs. Ctrl	Other
CAPN2	AT1	2.68456e-28	-0.442064	0.691	0.804	4.97718e-24	AL-TB vs. Ctrl	Down-Down
CAPN2	AT1	1.43004e-33	-0.431118	0.687	0.804	2.6513e-29	L-TB vs. Ctrl	Down-Down
CAPN8	AT1	5.74498e-20	-0.251451	0.032	0.109	1.06512e-15	L-TB vs. Ctrl	Down-Down
CAPNS1	AT1	8.31007e-11	-0.286199	0.441	0.547	1.54069e-06	AL-TB vs. Ctrl	Down-Down
CAPNS1	AT1	1.86738e-12	-0.30881	0.446	0.547	3.46212e-08	L-TB vs. Ctrl	Down-Down
CAPRIN1	AT1	2.23615e-24	-0.414195	0.212	0.361	4.14582e-20	L-TB vs. Ctrl	Down-Down
CAPRIN1	AT1	4.49645e-21	-0.454114	0.215	0.361	8.33642e-17	AL-TB vs. Ctrl	Down-Down
CARD16	AT1	1.92111e-09	0.320776	0.235	0.165	3.56173e-05	L-TB vs. Ctrl	Up-Up
CASC4	AT1	1.80046e-12	-0.284543	0.206	0.308	3.33805e-08	L-TB vs. Ctrl	Other
CAV1	AT1	3.4543e-14	0.367836	0.942	0.947	6.40428e-10	AL-TB vs. Ctrl	Up-Up
CAV1	AT1	3.43064e-16	0.306787	0.95	0.947	6.36041e-12	L-TB vs. Ctrl	Up-Up
CBX1	AT1	1.88012e-08	-0.253509	0.195	0.283	0.000348574	AL-TB vs. Ctrl	Down-Down
CBX1	AT1	3.85151e-14	-0.297128	0.176	0.283	7.14069e-10	L-TB vs. Ctrl	Down-Down
CCDC107	AT1	1.24227e-29	-0.509518	0.286	0.458	2.30316e-25	L-TB vs. Ctrl	Down-Down
CCDC107	AT1	4.63032e-15	-0.372075	0.326	0.458	8.58462e-11	AL-TB vs. Ctrl	Down-Down
CCDC47	AT1	8.36843e-13	-0.323756	0.325	0.446	1.55151e-08	AL-TB vs. Ctrl	Down-Down
CCDC47	AT1	2.7007e-12	-0.298511	0.336	0.446	5.00709e-08	L-TB vs. Ctrl	Down-Down
CCDC6	AT1	1.69636e-21	-0.416767	0.386	0.53	3.14505e-17	L-TB vs. Ctrl	Down-Down
CCDC6	AT1	1.63266e-18	-0.403017	0.387	0.53	3.02694e-14	AL-TB vs. Ctrl	Down-Down
CCDC84	AT1	9.81234e-16	-0.309818	0.32	0.457	1.81921e-11	L-TB vs. Ctrl	Down-Down
CCDC84	AT1	1.16293e-17	-0.354913	0.306	0.457	2.15607e-13	AL-TB vs. Ctrl	Down-Down
CCL2	AT1	2.61388e-10	-1.3179	0.095	0.161	4.84613e-06	L-TB vs. Ctrl	Down-Down
CCL2	AT1	1.74454e-14	-1.42743	0.095	0.179	3.23438e-10	L-TB vs. AL-TB	Down-Down
CCL20	AT1	7.95072e-21	-1.29235	0.206	0.341	1.47406e-16	L-TB vs. Ctrl	Down-Down
CCL20	AT1	2.02758e-26	-1.40276	0.174	0.341	3.75914e-22	AL-TB vs. Ctrl	Down-Down
CCL4	AT1	1.03411e-39	0.991924	0.648	0.488	1.91724e-35	L-TB vs. Ctrl	Up-Up
CCL4	AT1	9.4042e-17	0.319162	0.648	0.533	1.74354e-12	L-TB vs. AL-TB	Up-Up
CCL5	AT1	3.5462e-48	1.07894	0.324	0.125	6.57465e-44	L-TB vs. Ctrl	Up-Up
CCL5	AT1	1.6465e-29	1.1076	0.279	0.125	3.05261e-25	AL-TB vs. Ctrl	Up-Up
CCND1	AT1	2.3074e-09	-0.49212	0.343	0.426	4.27791e-05	L-TB vs. AL-TB	Down-Down
CCND1	AT1	2.4262e-26	-0.557692	0.426	0.588	4.49818e-22	AL-TB vs. Ctrl	Down-Down
CCND1	AT1	2.20825e-69	-1.04981	0.343	0.588	4.09409e-65	L-TB vs. Ctrl	Down-Down
CCNL1	AT1	1.03202e-48	0.724708	0.68	0.515	1.91337e-44	L-TB vs. Ctrl	Up-Up
CCNL1	AT1	1.91287e-26	0.676479	0.642	0.515	3.54647e-22	AL-TB vs. Ctrl	Up-Up
CCNL2	AT1	1.30328e-09	-0.301072	0.267	0.373	2.41628e-05	AL-TB vs. Ctrl	Down-Down
CCNL2	AT1	9.17442e-12	-0.34501	0.266	0.373	1.70094e-07	L-TB vs. Ctrl	Down-Down
CCT6A	AT1	5.2111e-12	-0.277964	0.3	0.409	9.66138e-08	L-TB vs. Ctrl	Down-Down
CD163	AT1	1.46443e-41	-0.526102	0.013	0.124	2.71505e-37	L-TB vs. Ctrl	Down-Down
CD163	AT1	1.19539e-26	-0.512629	0.023	0.124	2.21626e-22	AL-TB vs. Ctrl	Down-Down
CD2	AT1	1.12597e-17	0.518255	0.142	0.055	2.08755e-13	AL-TB vs. Ctrl	Up-Up
CD2	AT1	1.59769e-29	0.587127	0.173	0.055	2.96213e-25	L-TB vs. Ctrl	Up-Up
CD247	AT1	1.36938e-10	0.264938	0.131	0.065	2.53884e-06	AL-TB vs. Ctrl	Other
CD2AP	AT1	2.55177e-14	-0.290135	0.281	0.402	4.73098e-10	L-TB vs. Ctrl	Down-Down
CD37	AT1	8.53705e-23	0.578807	0.258	0.137	1.58277e-18	L-TB vs. Ctrl	Up-Up
CD37	AT1	2.85429e-12	0.382435	0.226	0.137	5.29185e-08	AL-TB vs. Ctrl	Up-Up
CD3D	AT1	2.33312e-32	0.59618	0.188	0.059	4.32561e-28	L-TB vs. Ctrl	Up-Up
CD3D	AT1	6.26239e-19	0.468029	0.153	0.059	1.16105e-14	AL-TB vs. Ctrl	Up-Up
CD3E	AT1	4.55719e-44	0.765284	0.203	0.051	8.44903e-40	L-TB vs. Ctrl	Up-Up
CD3E	AT1	9.08777e-24	0.494321	0.156	0.051	1.68487e-19	AL-TB vs. Ctrl	Up-Up
CD3G	AT1	3.06101e-19	0.356836	0.135	0.049	5.6751e-15	L-TB vs. Ctrl	Up-Up
CD3G	AT1	2.47574e-11	0.308399	0.112	0.049	4.59002e-07	AL-TB vs. Ctrl	Up-Up
CD46	AT1	3.79808e-47	-0.621279	0.582	0.75	7.04165e-43	L-TB vs. Ctrl	Down-Down
CD46	AT1	3.84459e-25	-0.450388	0.61	0.75	7.12788e-21	AL-TB vs. Ctrl	Down-Down
CD47	AT1	1.58109e-28	-0.417673	0.772	0.84	2.93134e-24	AL-TB vs. Ctrl	Other
CD47	AT1	1.94717e-35	-0.440929	0.781	0.84	3.61005e-31	L-TB vs. Ctrl	Other
CD48	AT1	1.51078e-15	0.349078	0.172	0.08	2.80098e-11	AL-TB vs. Ctrl	Up-Up
CD48	AT1	9.9515e-33	0.519073	0.22	0.08	1.84501e-28	L-TB vs. Ctrl	Up-Up
CD52	AT1	9.58319e-15	0.545491	0.342	0.24	1.77672e-10	L-TB vs. Ctrl	Up-Up
CD53	AT1	1.38073e-10	0.279587	0.212	0.135	2.55988e-06	L-TB vs. Ctrl	Up-Up
CD55	AT1	4.17397e-64	-0.637127	0.911	0.955	7.73854e-60	L-TB vs. Ctrl	Down-Down
CD55	AT1	2.69634e-40	-0.482151	0.906	0.955	4.99902e-36	AL-TB vs. Ctrl	Down-Down
CD59	AT1	5.21377e-15	-0.309904	0.594	0.684	9.66633e-11	L-TB vs. Ctrl	Down-Down
CD63	AT1	5.13717e-12	-0.269901	0.858	0.881	9.52431e-08	L-TB vs. AL-TB	Other
CD68	AT1	2.86062e-07	-0.277783	0.103	0.16	0.00530359	L-TB vs. Ctrl	Down-Down
CD69	AT1	1.66671e-22	0.796136	0.217	0.098	3.09008e-18	AL-TB vs. Ctrl	Up-Up
CD69	AT1	6.17276e-12	0.329901	0.325	0.217	1.14443e-07	L-TB vs. AL-TB	Up-Up
CD69	AT1	1.04958e-66	1.12604	0.325	0.098	1.94593e-62	L-TB vs. Ctrl	Up-Up
CD7	AT1	1.86022e-13	0.41386	0.135	0.06	3.44886e-09	AL-TB vs. Ctrl	Up-Up
CD7	AT1	3.70376e-30	0.617317	0.182	0.06	6.86677e-26	L-TB vs. Ctrl	Up-Up
CD74	AT1	7.40786e-14	0.665782	0.658	0.605	1.37342e-09	AL-TB vs. Ctrl	Up-Up
CD74	AT1	4.56389e-19	0.587105	0.693	0.605	8.46145e-15	L-TB vs. Ctrl	Up-Up
CD81	AT1	3.72051e-09	0.277901	0.796	0.752	6.89783e-05	AL-TB vs. Ctrl	Up-Up
CD9	AT1	3.06298e-16	0.397959	0.906	0.88	5.67877e-12	AL-TB vs. Ctrl	Other
CD9	AT1	6.82651e-08	-0.265881	0.886	0.906	0.00126563	L-TB vs. AL-TB	Other
CD99	AT1	1.25426e-09	0.292769	0.524	0.463	2.3254e-05	AL-TB vs. Ctrl	Up-Up
CD99	AT1	2.40856e-13	0.345126	0.537	0.463	4.46548e-09	L-TB vs. Ctrl	Up-Up
CDC25B	AT1	2.05836e-21	-0.269508	0.047	0.136	3.81621e-17	L-TB vs. Ctrl	Down-Down
CDC25B	AT1	9.46275e-21	-0.280943	0.04	0.136	1.75439e-16	AL-TB vs. Ctrl	Down-Down
CDC42BPA	AT1	1.85218e-13	-0.295103	0.161	0.27	3.43395e-09	AL-TB vs. Ctrl	Other
CDC42BPA	AT1	5.90963e-16	-0.3017	0.158	0.27	1.09564e-11	L-TB vs. Ctrl	Other
CDC42BPB	AT1	6.66438e-15	-0.302105	0.156	0.261	1.23558e-10	L-TB vs. Ctrl	Down-Down
CDH1	AT1	3.44286e-30	-0.492601	0.455	0.613	6.38307e-26	L-TB vs. Ctrl	Down-Down
CDH1	AT1	1.62491e-17	-0.476756	0.455	0.569	3.01259e-13	L-TB vs. AL-TB	Down-Down
CDKL5	AT1	1.9087e-16	-0.261176	0.081	0.172	3.53873e-12	L-TB vs. Ctrl	Down-Down
CDKN1A	AT1	7.07049e-12	0.429085	0.409	0.314	1.31087e-07	AL-TB vs. Ctrl	Other
CDKN1C	AT1	4.86982e-15	0.561854	0.293	0.189	9.02864e-11	AL-TB vs. Ctrl	Up-Up
CDKN1C	AT1	1.20435e-17	0.54398	0.297	0.189	2.23287e-13	L-TB vs. Ctrl	Up-Up
CDV3	AT1	3.55816e-11	-0.293725	0.511	0.607	6.59683e-07	L-TB vs. Ctrl	Down-Down
CDV3	AT1	1.33756e-09	-0.273608	0.504	0.607	2.47983e-05	AL-TB vs. Ctrl	Down-Down
CEACAM6	AT1	8.87555e-29	-0.776032	0.702	0.776	1.64553e-24	L-TB vs. Ctrl	Down-Down
CEACAM6	AT1	4.91795e-29	-0.828048	0.691	0.776	9.11787e-25	AL-TB vs. Ctrl	Down-Down
CEBPB	AT1	3.41033e-08	0.339686	0.674	0.638	0.000632276	L-TB vs. Ctrl	Up-Up
CELF1	AT1	4.1862e-21	-0.387419	0.315	0.461	7.76122e-17	L-TB vs. Ctrl	Down-Down
CELF1	AT1	1.36195e-13	-0.295321	0.33	0.461	2.52505e-09	AL-TB vs. Ctrl	Down-Down
CENPT	AT1	7.63849e-08	-0.255228	0.101	0.164	0.00141618	L-TB vs. AL-TB	Down-Down
CEP70	AT1	4.08923e-15	-0.251843	0.074	0.158	7.58143e-11	L-TB vs. Ctrl	Down-Down
CEPT1	AT1	1.99718e-15	-0.287167	0.15	0.257	3.70278e-11	L-TB vs. Ctrl	Down-Down
CEPT1	AT1	8.81198e-15	-0.267747	0.144	0.257	1.63374e-10	AL-TB vs. Ctrl	Down-Down
CFH	AT1	2.15901e-12	0.299958	0.123	0.055	4.0028e-08	AL-TB vs. Ctrl	Other
CFL1	AT1	1.34658e-13	0.286175	0.797	0.767	2.49656e-09	AL-TB vs. Ctrl	Other
CFLAR	AT1	8.33137e-17	-0.355756	0.745	0.802	1.54464e-12	L-TB vs. Ctrl	Down-Down
CHD9	AT1	4.22429e-12	-0.318163	0.426	0.538	7.83184e-08	L-TB vs. Ctrl	Down-Down
CHP1	AT1	7.43786e-11	-0.263362	0.282	0.395	1.37898e-06	AL-TB vs. Ctrl	Down-Down
CISH	AT1	1.0586e-17	-0.306905	0.047	0.125	1.96264e-13	L-TB vs. Ctrl	Down-Down
CKAP4	AT1	2.01856e-18	-0.338211	0.155	0.271	3.7424e-14	L-TB vs. Ctrl	Down-Down
CLCF1	AT1	1.03355e-27	0.599565	0.162	0.049	1.91621e-23	AL-TB vs. Ctrl	Other
CLCF1	AT1	2.46114e-11	-0.433734	0.09	0.162	4.56295e-07	L-TB vs. AL-TB	Other
CLCN3	AT1	1.3791e-15	-0.281139	0.174	0.289	2.55686e-11	L-TB vs. Ctrl	Down-Down
CLDN12	AT1	7.55144e-13	-0.285925	0.085	0.169	1.40004e-08	AL-TB vs. Ctrl	Down-Down
CLDN12	AT1	6.30579e-17	-0.291659	0.079	0.169	1.16909e-12	L-TB vs. Ctrl	Down-Down
CLDN18	AT1	1.91941e-09	-0.274469	0.747	0.838	3.55858e-05	AL-TB vs. Ctrl	Other
CLDN18	AT1	1.97845e-20	-0.438697	0.742	0.838	3.66805e-16	L-TB vs. Ctrl	Other
CLDN3	AT1	3.90336e-15	0.469653	0.297	0.19	7.23683e-11	AL-TB vs. Ctrl	Up-Up
CLDN4	AT1	6.95948e-28	0.850965	0.662	0.571	1.29029e-23	L-TB vs. Ctrl	Up-Up
CLDN4	AT1	5.61421e-43	1.29052	0.685	0.571	1.04088e-38	AL-TB vs. Ctrl	Up-Up
CLDN7	AT1	2.97183e-16	-0.372712	0.553	0.664	5.50978e-12	L-TB vs. Ctrl	Down-Down
CLDN7	AT1	2.36595e-13	-0.375622	0.553	0.644	4.38648e-09	L-TB vs. AL-TB	Down-Down
CLEC2B	AT1	7.02501e-18	0.376362	0.187	0.09	1.30244e-13	L-TB vs. Ctrl	Up-Up
CLINT1	AT1	8.02364e-17	-0.341196	0.307	0.45	1.48758e-12	AL-TB vs. Ctrl	Down-Down
CLINT1	AT1	1.75317e-19	-0.408652	0.316	0.45	3.25038e-15	L-TB vs. Ctrl	Down-Down
CLIP1	AT1	5.33976e-13	-0.272822	0.324	0.446	9.89992e-09	AL-TB vs. Ctrl	Down-Down
CLIP1	AT1	4.30295e-34	-0.572122	0.262	0.446	7.97766e-30	L-TB vs. Ctrl	Down-Down
CLIP4	AT1	1.47404e-12	-0.274595	0.177	0.277	2.73286e-08	L-TB vs. Ctrl	Down-Down
CLK1	AT1	2.3941e-11	0.260251	0.456	0.366	4.43866e-07	L-TB vs. Ctrl	Up-Up
CLMN	AT1	1.95804e-12	-0.307093	0.123	0.208	3.6302e-08	L-TB vs. Ctrl	Other
CLOCK	AT1	1.26104e-15	-0.270215	0.143	0.25	2.33796e-11	L-TB vs. Ctrl	Down-Down
CLPTM1L	AT1	1.59155e-36	-0.562813	0.319	0.504	2.95073e-32	L-TB vs. Ctrl	Down-Down
CLPTM1L	AT1	1.73732e-33	-0.605687	0.315	0.504	3.22099e-29	AL-TB vs. Ctrl	Down-Down
CLPX	AT1	1.49023e-19	-0.311359	0.127	0.244	2.76288e-15	L-TB vs. Ctrl	Down-Down
CLPX	AT1	9.60228e-15	-0.321656	0.136	0.244	1.78026e-10	AL-TB vs. Ctrl	Down-Down
CLTC	AT1	2.29933e-37	-0.533963	0.356	0.546	4.26295e-33	L-TB vs. Ctrl	Down-Down
CLTC	AT1	6.41862e-19	-0.440907	0.407	0.546	1.19001e-14	AL-TB vs. Ctrl	Down-Down
CLUH	AT1	1.32922e-19	-0.281401	0.074	0.173	2.46438e-15	L-TB vs. Ctrl	Down-Down
CMTM4	AT1	2.99642e-19	-0.323847	0.195	0.325	5.55535e-15	L-TB vs. Ctrl	Other
CNBP	AT1	1.53749e-10	0.290708	0.542	0.465	2.85051e-06	L-TB vs. Ctrl	Up-Up
CNBP	AT1	8.47295e-10	0.339665	0.54	0.465	1.57088e-05	AL-TB vs. Ctrl	Up-Up
CNDP2	AT1	4.35834e-18	-0.315379	0.25	0.39	8.08037e-14	L-TB vs. Ctrl	Down-Down
CNKSR3	AT1	4.26746e-07	0.460243	0.176	0.119	0.00791187	AL-TB vs. Ctrl	Other
CNKSR3	AT1	5.45316e-08	-0.308915	0.11	0.176	0.00101102	L-TB vs. AL-TB	Other
CNN2	AT1	1.25837e-10	0.30574	0.456	0.38	2.33302e-06	L-TB vs. Ctrl	Up-Up
CNN2	AT1	1.34282e-07	0.296756	0.438	0.38	0.00248959	AL-TB vs. Ctrl	Up-Up
CNN3	AT1	1.74086e-15	-0.333408	0.431	0.55	3.22755e-11	L-TB vs. Ctrl	Down-Down
CNOT6L	AT1	1.22118e-16	0.517159	0.326	0.222	2.26407e-12	L-TB vs. Ctrl	Up-Up
COBLL1	AT1	1.28881e-35	-0.615887	0.31	0.498	2.38945e-31	L-TB vs. Ctrl	Down-Down
COBLL1	AT1	1.64696e-34	-0.668928	0.301	0.498	3.05346e-30	AL-TB vs. Ctrl	Down-Down
COL12A1	AT1	2.00553e-24	-0.405022	0.461	0.62	3.71826e-20	L-TB vs. Ctrl	Down-Down
COL4A1	AT1	1.04788e-07	-0.319698	0.323	0.404	0.00194277	L-TB vs. AL-TB	Down-Down
COL4A1	AT1	1.1881e-28	-0.561962	0.323	0.495	2.20274e-24	L-TB vs. Ctrl	Down-Down
COL4A2	AT1	1.71778e-20	-0.477465	0.401	0.549	3.18476e-16	L-TB vs. Ctrl	Down-Down
COL4A3BP	AT1	1.07893e-09	-0.256281	0.235	0.327	2.00034e-05	L-TB vs. Ctrl	Down-Down
COL8A1	AT1	1.42733e-65	-0.928543	0.379	0.627	2.64627e-61	L-TB vs. Ctrl	Down-Down
COL8A1	AT1	2.67325e-41	-0.761888	0.409	0.627	4.9562e-37	AL-TB vs. Ctrl	Down-Down
COMMD6	AT1	1.02611e-21	0.513455	0.53	0.425	1.90241e-17	L-TB vs. Ctrl	Up-Up
CORO1A	AT1	5.3283e-24	0.452629	0.213	0.094	9.87866e-20	L-TB vs. Ctrl	Up-Up
CORO1A	AT1	2.34242e-12	0.387017	0.175	0.094	4.34284e-08	AL-TB vs. Ctrl	Up-Up
COTL1	AT1	1.37347e-09	0.346347	0.255	0.169	2.54642e-05	AL-TB vs. Ctrl	Up-Up
COTL1	AT1	1.11662e-09	0.286299	0.25	0.169	2.0702e-05	L-TB vs. Ctrl	Up-Up
COX11	AT1	1.81768e-17	-0.301991	0.11	0.213	3.36999e-13	L-TB vs. Ctrl	Down-Down
COX11	AT1	8.96888e-16	-0.296252	0.106	0.213	1.66283e-11	AL-TB vs. Ctrl	Down-Down
COX20	AT1	4.29954e-11	-0.2709	0.199	0.303	7.97135e-07	AL-TB vs. Ctrl	Down-Down
COX6C	AT1	2.03427e-07	-0.262296	0.639	0.683	0.00377154	AL-TB vs. Ctrl	Other
CPEB4	AT1	7.1288e-32	-0.616875	0.359	0.549	1.32168e-27	AL-TB vs. Ctrl	Down-Down
CPEB4	AT1	1.39571e-34	-0.603526	0.366	0.549	2.58764e-30	L-TB vs. Ctrl	Down-Down
CPM	AT1	1.23801e-09	-0.305096	0.599	0.676	2.29528e-05	L-TB vs. AL-TB	Other
CPM	AT1	9.64868e-15	-0.496475	0.599	0.676	1.78887e-10	L-TB vs. Ctrl	Other
CPNE3	AT1	1.18545e-11	-0.27088	0.374	0.492	2.19782e-07	AL-TB vs. Ctrl	Down-Down
CPNE3	AT1	3.46582e-13	-0.276568	0.38	0.492	6.42562e-09	L-TB vs. Ctrl	Down-Down
CREBZF	AT1	8.66674e-11	-0.325215	0.24	0.346	1.60681e-06	AL-TB vs. Ctrl	Other
CREBZF	AT1	2.4224e-09	-0.255747	0.251	0.346	4.49113e-05	L-TB vs. Ctrl	Other
CREM	AT1	1.51993e-16	0.730286	0.259	0.154	2.81794e-12	AL-TB vs. Ctrl	Up-Up
CREM	AT1	6.94492e-11	0.348345	0.366	0.259	1.28759e-06	L-TB vs. AL-TB	Up-Up
CREM	AT1	1.63773e-55	1.07863	0.366	0.154	3.03635e-51	L-TB vs. Ctrl	Up-Up
CRIP2	AT1	1.00767e-11	0.431321	0.467	0.374	1.86823e-07	AL-TB vs. Ctrl	Up-Up
CRK	AT1	1.41944e-18	-0.357819	0.335	0.47	2.63164e-14	L-TB vs. Ctrl	Down-Down
CRK	AT1	2.83591e-14	-0.349115	0.348	0.47	5.25778e-10	AL-TB vs. Ctrl	Down-Down
CRLS1	AT1	1.20423e-19	-0.376492	0.243	0.395	2.23264e-15	AL-TB vs. Ctrl	Down-Down
CRLS1	AT1	5.23139e-29	-0.445993	0.224	0.395	9.69899e-25	L-TB vs. Ctrl	Down-Down
CRTAP	AT1	3.13487e-14	-0.296822	0.138	0.235	5.81205e-10	L-TB vs. Ctrl	Down-Down
CRTAP	AT1	1.26682e-10	-0.272291	0.146	0.235	2.34869e-06	AL-TB vs. Ctrl	Down-Down
CRYAB	AT1	7.81036e-16	1.15103	0.338	0.237	1.44804e-11	L-TB vs. Ctrl	Up-Up
CRYAB	AT1	2.16705e-06	0.873985	0.292	0.237	0.040177	AL-TB vs. Ctrl	Up-Up
CSPG5	AT1	3.6719e-38	-0.429918	0.026	0.144	6.80771e-34	L-TB vs. Ctrl	Down-Down
CSPG5	AT1	4.61525e-31	-0.4308	0.026	0.144	8.55667e-27	AL-TB vs. Ctrl	Down-Down
CSRNP1	AT1	5.18762e-82	1.06736	0.492	0.196	9.61786e-78	AL-TB vs. Ctrl	Up-Up
CSRNP1	AT1	1.07258e-78	0.951666	0.469	0.196	1.98856e-74	L-TB vs. Ctrl	Up-Up
CST6	AT1	1.32499e-06	0.328644	0.513	0.463	0.0245653	AL-TB vs. Ctrl	Other
CST6	AT1	2.2689e-08	-0.352106	0.438	0.513	0.000420653	L-TB vs. AL-TB	Other
CST7	AT1	6.65659e-19	0.546686	0.24	0.13	1.23413e-14	L-TB vs. Ctrl	Up-Up
CST7	AT1	7.37373e-08	0.436252	0.195	0.13	0.00136709	AL-TB vs. Ctrl	Up-Up
CTGF	AT1	9.52752e-51	1.47346	0.52	0.321	1.7664e-46	L-TB vs. Ctrl	Up-Up
CTGF	AT1	1.86977e-58	1.54775	0.551	0.321	3.46655e-54	AL-TB vs. Ctrl	Up-Up
CTNNA1	AT1	3.77089e-20	-0.439955	0.59	0.697	6.99122e-16	AL-TB vs. Ctrl	Down-Down
CTNNA1	AT1	3.55415e-28	-0.499692	0.585	0.697	6.5894e-24	L-TB vs. Ctrl	Down-Down
CTNNBIP1	AT1	1.27025e-16	-0.291495	0.287	0.425	2.35505e-12	L-TB vs. Ctrl	Down-Down
CTNNBIP1	AT1	2.06845e-21	-0.382436	0.266	0.425	3.83491e-17	AL-TB vs. Ctrl	Down-Down
CTSB	AT1	1.38677e-11	-0.378949	0.293	0.394	2.57108e-07	L-TB vs. Ctrl	Down-Down
CTSD	AT1	5.59966e-31	-0.567097	0.635	0.737	1.03818e-26	L-TB vs. Ctrl	Down-Down
CTSD	AT1	5.85996e-15	-0.386791	0.658	0.737	1.08644e-10	AL-TB vs. Ctrl	Down-Down
CTSE	AT1	8.27129e-10	-0.395975	0.172	0.255	1.5335e-05	L-TB vs. AL-TB	Down-Down
CTSE	AT1	1.37657e-32	-0.546747	0.172	0.344	2.55217e-28	L-TB vs. Ctrl	Down-Down
CTSH	AT1	5.0731e-10	-0.308962	0.39	0.486	9.40553e-06	L-TB vs. Ctrl	Down-Down
CTSL	AT1	2.62889e-06	-0.259967	0.231	0.309	0.0487396	AL-TB vs. Ctrl	Down-Down
CTSL	AT1	2.88131e-10	-0.332672	0.218	0.309	5.34196e-06	L-TB vs. Ctrl	Down-Down
CTSZ	AT1	3.33385e-11	-0.281438	0.405	0.501	6.18095e-07	L-TB vs. Ctrl	Down-Down
CTTN	AT1	2.01414e-32	-0.512923	0.336	0.52	3.73421e-28	L-TB vs. Ctrl	Down-Down
CTTN	AT1	1.27184e-13	-0.386689	0.399	0.52	2.358e-09	AL-TB vs. Ctrl	Down-Down
CUTA	AT1	3.18538e-09	0.289225	0.508	0.438	5.9057e-05	L-TB vs. Ctrl	Up-Up
CUX1	AT1	3.64307e-19	-0.375879	0.458	0.593	6.75425e-15	L-TB vs. Ctrl	Down-Down
CUX1	AT1	2.83924e-12	-0.326104	0.481	0.593	5.26394e-08	AL-TB vs. Ctrl	Down-Down
CXCL1	AT1	1.21349e-07	0.311853	0.147	0.088	0.00224982	L-TB vs. AL-TB	Other
CXCR4	AT1	4.60239e-13	0.875656	0.316	0.221	8.53283e-09	AL-TB vs. Ctrl	Up-Up
CXCR4	AT1	9.69716e-68	1.26209	0.472	0.221	1.79785e-63	L-TB vs. Ctrl	Up-Up
CXCR4	AT1	1.6995e-18	0.386432	0.472	0.316	3.15088e-14	L-TB vs. AL-TB	Up-Up
CYB5R3	AT1	1.14083e-09	-0.257687	0.397	0.5	2.11509e-05	AL-TB vs. Ctrl	Down-Down
CYBA	AT1	2.36741e-09	0.296443	0.477	0.403	4.38919e-05	L-TB vs. Ctrl	Up-Up
CYFIP1	AT1	1.01937e-12	-0.265064	0.217	0.334	1.88991e-08	AL-TB vs. Ctrl	Down-Down
CYFIP1	AT1	3.97676e-18	-0.331541	0.203	0.334	7.37292e-14	L-TB vs. Ctrl	Down-Down
CYR61	AT1	7.39808e-88	1.5714	0.773	0.58	1.3716e-83	AL-TB vs. Ctrl	Up-Up
CYR61	AT1	7.53461e-70	1.48005	0.727	0.58	1.39692e-65	L-TB vs. Ctrl	Up-Up
CYSTM1	AT1	3.608e-11	0.355851	0.703	0.649	6.68923e-07	AL-TB vs. Ctrl	Up-Up
CYSTM1	AT1	1.08801e-15	0.419241	0.71	0.649	2.01717e-11	L-TB vs. Ctrl	Up-Up
CYTIP	AT1	2.43755e-18	0.430072	0.19	0.092	4.51922e-14	L-TB vs. Ctrl	Up-Up
CYTIP	AT1	5.66406e-08	0.290369	0.153	0.092	0.00105012	AL-TB vs. Ctrl	Up-Up
DAB2IP	AT1	1.23118e-25	-0.39295	0.209	0.366	2.28261e-21	L-TB vs. Ctrl	Down-Down
DAB2IP	AT1	1.70354e-14	-0.302271	0.239	0.366	3.15837e-10	AL-TB vs. Ctrl	Down-Down
DAD1	AT1	2.40007e-09	0.297916	0.578	0.515	4.44974e-05	AL-TB vs. Ctrl	Other
DAGLB	AT1	7.72873e-17	-0.263683	0.082	0.175	1.43291e-12	L-TB vs. Ctrl	Down-Down
DAPK2	AT1	4.60333e-11	-0.336455	0.499	0.614	8.53457e-07	AL-TB vs. Ctrl	Other
DDHD2	AT1	1.77188e-14	-0.281596	0.085	0.179	3.28506e-10	AL-TB vs. Ctrl	Down-Down
DDI2	AT1	1.52518e-15	-0.312933	0.097	0.189	2.82768e-11	L-TB vs. Ctrl	Down-Down
DDI2	AT1	7.15595e-12	-0.269803	0.102	0.189	1.32671e-07	AL-TB vs. Ctrl	Down-Down
DDIT4	AT1	8.32273e-20	0.673546	0.256	0.136	1.54303e-15	AL-TB vs. Ctrl	Up-Up
DDIT4	AT1	2.97166e-46	0.821346	0.328	0.136	5.50945e-42	L-TB vs. Ctrl	Up-Up
DDX1	AT1	1.29606e-15	-0.297739	0.213	0.332	2.40289e-11	L-TB vs. Ctrl	Down-Down
DDX1	AT1	2.42013e-13	-0.316121	0.212	0.332	4.48691e-09	AL-TB vs. Ctrl	Down-Down
DDX17	AT1	1.18661e-10	-0.31627	0.721	0.785	2.19998e-06	AL-TB vs. Ctrl	Down-Down
DDX21	AT1	2.06239e-15	-0.414702	0.345	0.478	3.82368e-11	AL-TB vs. Ctrl	Down-Down
DDX21	AT1	1.08732e-10	-0.288826	0.37	0.478	2.0159e-06	L-TB vs. Ctrl	Down-Down
DDX3X	AT1	1.76361e-11	0.391665	0.599	0.538	3.26973e-07	L-TB vs. Ctrl	Up-Up
DDX46	AT1	5.34993e-12	-0.288794	0.352	0.461	9.91877e-08	L-TB vs. Ctrl	Down-Down
DDX46	AT1	1.15469e-12	-0.279052	0.34	0.461	2.14079e-08	AL-TB vs. Ctrl	Down-Down
DEDD2	AT1	1.06916e-14	0.314127	0.198	0.107	1.98222e-10	L-TB vs. Ctrl	Up-Up
DEK	AT1	2.61955e-13	-0.328517	0.394	0.522	4.85665e-09	AL-TB vs. Ctrl	Down-Down
DENND3	AT1	7.18184e-09	-0.304921	0.547	0.645	0.000133151	AL-TB vs. Ctrl	Down-Down
DENND3	AT1	3.19259e-11	-0.330758	0.557	0.645	5.91906e-07	L-TB vs. Ctrl	Down-Down
DGKH	AT1	4.05888e-17	-0.402447	0.118	0.231	7.52515e-13	AL-TB vs. Ctrl	Down-Down
DGKH	AT1	3.41643e-22	-0.474293	0.113	0.231	6.33405e-18	L-TB vs. Ctrl	Down-Down
DHCR24	AT1	9.47282e-58	-0.789356	0.56	0.733	1.75626e-53	L-TB vs. Ctrl	Down-Down
DHCR24	AT1	4.11672e-42	-0.721233	0.576	0.733	7.63239e-38	AL-TB vs. Ctrl	Down-Down
DIAPH1	AT1	3.63765e-18	-0.357726	0.298	0.436	6.7442e-14	L-TB vs. Ctrl	Down-Down
DIAPH2	AT1	1.52659e-18	-0.334952	0.206	0.353	2.8303e-14	AL-TB vs. Ctrl	Down-Down
DIAPH2	AT1	1.24737e-24	-0.390498	0.199	0.353	2.31262e-20	L-TB vs. Ctrl	Down-Down
DICER1	AT1	5.21917e-19	-0.366103	0.272	0.427	9.67633e-15	AL-TB vs. Ctrl	Down-Down
DICER1	AT1	6.80119e-29	-0.448266	0.254	0.427	1.26094e-24	L-TB vs. Ctrl	Down-Down
DLAT	AT1	8.82206e-23	-0.32139	0.07	0.176	1.63561e-18	L-TB vs. Ctrl	Down-Down
DLAT	AT1	3.02528e-18	-0.323497	0.073	0.176	5.60887e-14	AL-TB vs. Ctrl	Down-Down
DMKN	AT1	1.23585e-10	-0.259551	0.399	0.517	2.29127e-06	AL-TB vs. Ctrl	Down-Down
DMKN	AT1	1.89502e-19	-0.344898	0.376	0.517	3.51337e-15	L-TB vs. Ctrl	Down-Down
DMXL1	AT1	4.45978e-14	-0.28069	0.152	0.255	8.26843e-10	L-TB vs. Ctrl	Other
DMXL2	AT1	2.74062e-12	-0.288881	0.079	0.161	5.08112e-08	AL-TB vs. Ctrl	Down-Down
DMXL2	AT1	1.75338e-13	-0.251762	0.081	0.161	3.25076e-09	L-TB vs. Ctrl	Down-Down
DNAH14	AT1	2.13037e-10	-0.282444	0.072	0.141	3.94971e-06	AL-TB vs. Ctrl	Down-Down
DNAJA1	AT1	1.01024e-59	0.658483	0.759	0.595	1.87298e-55	L-TB vs. Ctrl	Up-Up
DNAJA1	AT1	6.23396e-38	0.56289	0.728	0.595	1.15578e-33	AL-TB vs. Ctrl	Up-Up
DNAJB1	AT1	1.30363e-88	1.17026	0.76	0.488	2.41693e-84	AL-TB vs. Ctrl	Up-Up
DNAJB1	AT1	1.07248e-132	1.33102	0.793	0.488	1.98839e-128	L-TB vs. Ctrl	Up-Up
DNAJB14	AT1	6.29225e-20	-0.345245	0.277	0.419	1.16658e-15	L-TB vs. Ctrl	Down-Down
DNAJB14	AT1	5.4144e-13	-0.317596	0.297	0.419	1.00383e-08	AL-TB vs. Ctrl	Down-Down
DNAJB4	AT1	2.98383e-42	0.818029	0.388	0.194	5.53202e-38	L-TB vs. Ctrl	Up-Up
DNAJB4	AT1	7.17904e-11	0.459977	0.388	0.288	1.33099e-06	L-TB vs. AL-TB	Up-Up
DNAJB4	AT1	5.03502e-11	0.358052	0.288	0.194	9.33492e-07	AL-TB vs. Ctrl	Up-Up
DNAJB6	AT1	4.25321e-12	0.403219	0.553	0.483	7.88544e-08	L-TB vs. Ctrl	Up-Up
DNAJC10	AT1	1.38187e-29	-0.381903	0.148	0.306	2.56198e-25	L-TB vs. Ctrl	Down-Down
DNAJC10	AT1	2.91892e-16	-0.284299	0.178	0.306	5.41168e-12	AL-TB vs. Ctrl	Down-Down
DNM2	AT1	4.78121e-29	-0.465821	0.235	0.422	8.86437e-25	AL-TB vs. Ctrl	Down-Down
DNM2	AT1	2.41369e-29	-0.422593	0.246	0.422	4.47498e-25	L-TB vs. Ctrl	Down-Down
DOCK11	AT1	2.89505e-16	-0.300857	0.144	0.253	5.36743e-12	L-TB vs. Ctrl	Down-Down
DOCK11	AT1	1.47423e-11	-0.293844	0.156	0.253	2.73323e-07	AL-TB vs. Ctrl	Down-Down
DOCK5	AT1	5.45333e-13	-0.36465	0.239	0.357	1.01105e-08	AL-TB vs. Ctrl	Other
DOCK5	AT1	7.51543e-16	-0.372528	0.233	0.357	1.39336e-11	L-TB vs. Ctrl	Other
DPP4	AT1	2.42353e-11	-0.288771	0.042	0.104	4.49322e-07	AL-TB vs. Ctrl	Down-Down
DPY19L1	AT1	1.88868e-08	-0.260236	0.194	0.282	0.000350162	AL-TB vs. Ctrl	Down-Down
DPY19L1	AT1	7.47148e-21	-0.3887	0.153	0.282	1.38521e-16	L-TB vs. Ctrl	Down-Down
DPYSL2	AT1	2.28015e-17	-0.356419	0.612	0.713	4.2274e-13	AL-TB vs. Ctrl	Other
DSC2	AT1	2.9347e-09	-0.302696	0.178	0.265	5.44093e-05	AL-TB vs. Ctrl	Down-Down
DSC2	AT1	4.64765e-33	-0.498001	0.11	0.265	8.61675e-29	L-TB vs. Ctrl	Down-Down
DSG2	AT1	5.17095e-18	-0.346994	0.259	0.393	9.58693e-14	L-TB vs. Ctrl	Down-Down
DSP	AT1	1.44641e-15	-0.312258	0.257	0.384	2.68164e-11	L-TB vs. Ctrl	Down-Down
DST	AT1	1.76986e-35	-0.598606	0.691	0.809	3.28131e-31	AL-TB vs. Ctrl	Down-Down
DST	AT1	1.9651e-58	-0.79101	0.681	0.809	3.64329e-54	L-TB vs. Ctrl	Down-Down
DSTN	AT1	1.51791e-44	-0.585411	0.882	0.929	2.81421e-40	AL-TB vs. Ctrl	Other
DSTN	AT1	7.64432e-30	-0.432125	0.908	0.929	1.41726e-25	L-TB vs. Ctrl	Other
DTX3L	AT1	6.18411e-15	-0.280706	0.166	0.276	1.14653e-10	L-TB vs. Ctrl	Down-Down
DUOX1	AT1	1.30066e-91	-1.27595	0.192	0.524	2.41143e-87	AL-TB vs. Ctrl	Down-Down
DUOX1	AT1	1.4859e-97	-1.26429	0.217	0.524	2.75485e-93	L-TB vs. Ctrl	Down-Down
DUOXA1	AT1	1.10961e-67	-1.19419	0.133	0.406	2.05721e-63	AL-TB vs. Ctrl	Down-Down
DUOXA1	AT1	1.86032e-63	-1.095	0.165	0.406	3.44904e-59	L-TB vs. Ctrl	Down-Down
DUS1L	AT1	3.87461e-08	-0.251872	0.184	0.259	0.000718354	L-TB vs. Ctrl	Down-Down
DUSP1	AT1	1.29962e-24	0.557366	0.901	0.891	2.4095e-20	AL-TB vs. Ctrl	Up-Up
DUSP1	AT1	1.93353e-72	0.697882	0.932	0.891	3.58477e-68	L-TB vs. Ctrl	Up-Up
DUSP14	AT1	4.74334e-11	0.285015	0.167	0.093	8.79415e-07	AL-TB vs. Ctrl	Other
DUSP2	AT1	1.36803e-06	0.282532	0.343	0.264	0.0253633	L-TB vs. AL-TB	Up-Up
DUSP2	AT1	1.29597e-35	0.922338	0.343	0.175	2.40273e-31	L-TB vs. Ctrl	Up-Up
DUSP2	AT1	7.56617e-12	0.639806	0.264	0.175	1.40277e-07	AL-TB vs. Ctrl	Up-Up
DUSP5	AT1	2.42657e-11	0.293015	0.122	0.057	4.49887e-07	AL-TB vs. Ctrl	Up-Up
DUSP5	AT1	4.29989e-18	0.361208	0.142	0.057	7.972e-14	L-TB vs. Ctrl	Up-Up
DUSP7	AT1	8.29856e-18	-0.264368	0.063	0.15	1.53855e-13	L-TB vs. Ctrl	Down-Down
DYNC1H1	AT1	1.26959e-31	-0.493734	0.483	0.648	2.35381e-27	L-TB vs. Ctrl	Down-Down
DYNC1H1	AT1	7.43908e-17	-0.351697	0.514	0.648	1.37921e-12	AL-TB vs. Ctrl	Down-Down
DYNC1LI2	AT1	1.67549e-18	-0.36917	0.356	0.488	3.10636e-14	L-TB vs. Ctrl	Down-Down
DYNC1LI2	AT1	2.02671e-14	-0.339298	0.353	0.488	3.75751e-10	AL-TB vs. Ctrl	Down-Down
DYNLL1	AT1	2.34769e-27	0.464278	0.735	0.634	4.35263e-23	AL-TB vs. Ctrl	Up-Up
DYNLL1	AT1	4.48166e-16	0.308774	0.717	0.634	8.30901e-12	L-TB vs. Ctrl	Up-Up
ECHDC1	AT1	5.55282e-14	-0.321488	0.325	0.457	1.02949e-09	AL-TB vs. Ctrl	Other
ECHDC1	AT1	3.84134e-15	-0.285169	0.325	0.457	7.12185e-11	L-TB vs. Ctrl	Other
EDC4	AT1	7.00673e-07	0.323622	0.178	0.119	0.0129905	AL-TB vs. Ctrl	Other
EDIL3	AT1	1.74862e-12	-0.285469	0.143	0.244	3.24193e-08	AL-TB vs. Ctrl	Other
EDIL3	AT1	1.27591e-15	-0.276465	0.138	0.244	2.36554e-11	L-TB vs. Ctrl	Other
EEA1	AT1	6.60844e-18	-0.3075	0.189	0.312	1.2252e-13	L-TB vs. Ctrl	Down-Down
EEA1	AT1	9.93531e-10	-0.250063	0.215	0.312	1.84201e-05	AL-TB vs. Ctrl	Down-Down
EEF1A1	AT1	8.45924e-44	0.598666	0.985	0.959	1.56834e-39	L-TB vs. Ctrl	Up-Up
EEF1A1	AT1	3.84981e-18	0.380673	0.969	0.959	7.13755e-14	AL-TB vs. Ctrl	Up-Up
EEF1B2	AT1	4.35237e-11	0.46148	0.595	0.559	8.0693e-07	L-TB vs. Ctrl	Up-Up
EEF1D	AT1	3.11959e-07	0.318388	0.605	0.6	0.00578372	L-TB vs. Ctrl	Other
EFCAB14	AT1	1.36597e-18	-0.327517	0.234	0.368	2.53251e-14	L-TB vs. Ctrl	Down-Down
EFCAB14	AT1	7.8299e-14	-0.266828	0.243	0.368	1.45166e-09	AL-TB vs. Ctrl	Down-Down
EGFR	AT1	1.80514e-15	-0.385053	0.391	0.515	3.34674e-11	L-TB vs. Ctrl	Down-Down
EGFR	AT1	9.09214e-10	-0.272135	0.406	0.515	1.68568e-05	AL-TB vs. Ctrl	Down-Down
EGR1	AT1	2.04451e-166	1.95224	0.717	0.337	3.79053e-162	L-TB vs. Ctrl	Up-Up
EGR1	AT1	1.40864e-104	1.72064	0.668	0.337	2.61162e-100	AL-TB vs. Ctrl	Up-Up
EHD2	AT1	5.83513e-15	-0.289446	0.366	0.493	1.08183e-10	L-TB vs. Ctrl	Down-Down
EHD2	AT1	4.23967e-15	-0.327196	0.357	0.493	7.86036e-11	AL-TB vs. Ctrl	Down-Down
EIF1	AT1	4.50782e-116	0.656066	0.966	0.92	8.3575e-112	L-TB vs. Ctrl	Up-Up
EIF1	AT1	7.91715e-69	0.508464	0.96	0.92	1.46784e-64	AL-TB vs. Ctrl	Up-Up
EIF2AK1	AT1	1.70491e-19	-0.377484	0.207	0.343	3.1609e-15	L-TB vs. Ctrl	Down-Down
EIF2AK1	AT1	1.07633e-12	-0.328215	0.227	0.343	1.99551e-08	AL-TB vs. Ctrl	Down-Down
EIF2S2	AT1	1.38446e-10	-0.295138	0.445	0.545	2.56679e-06	AL-TB vs. Ctrl	Other
EIF2S2	AT1	1.61135e-09	-0.26514	0.452	0.545	2.98744e-05	L-TB vs. Ctrl	Other
EIF3A	AT1	5.35498e-14	-0.33864	0.45	0.557	9.92813e-10	L-TB vs. Ctrl	Down-Down
EIF3A	AT1	7.05342e-11	-0.315311	0.45	0.557	1.3077e-06	AL-TB vs. Ctrl	Down-Down
EIF3K	AT1	9.37883e-08	0.271803	0.513	0.465	0.00173883	L-TB vs. Ctrl	Other
EIF4G1	AT1	3.05364e-16	-0.305648	0.331	0.467	5.66144e-12	L-TB vs. Ctrl	Down-Down
EIF5	AT1	1.72804e-14	0.298871	0.596	0.499	3.20378e-10	L-TB vs. Ctrl	Up-Up
EIF5	AT1	2.46521e-17	0.424727	0.615	0.499	4.5705e-13	AL-TB vs. Ctrl	Up-Up
EIF5B	AT1	1.45936e-10	-0.286897	0.386	0.487	2.70566e-06	AL-TB vs. Ctrl	Down-Down
ELF1	AT1	1.50622e-07	0.311796	0.435	0.383	0.00279253	L-TB vs. Ctrl	Other
ELF3	AT1	2.57054e-26	0.928824	0.671	0.559	4.76578e-22	AL-TB vs. Ctrl	Other
ELF3	AT1	7.73314e-15	-0.641784	0.585	0.671	1.43372e-10	L-TB vs. AL-TB	Other
ELL2	AT1	1.46253e-19	0.449751	0.298	0.181	2.71154e-15	L-TB vs. Ctrl	Up-Up
ELOVL1	AT1	7.09165e-16	-0.2887	0.233	0.353	1.31479e-11	L-TB vs. Ctrl	Other
EMD	AT1	9.47554e-09	0.377986	0.292	0.217	0.000175676	AL-TB vs. Ctrl	Up-Up
EMD	AT1	1.93022e-09	0.332078	0.293	0.217	3.57862e-05	L-TB vs. Ctrl	Up-Up
EMP2	AT1	1.85331e-12	0.303939	0.967	0.968	3.43603e-08	AL-TB vs. Ctrl	Up-Up
EMP3	AT1	2.98048e-08	0.349318	0.303	0.224	0.000552582	AL-TB vs. Ctrl	Up-Up
ENO1	AT1	7.10147e-29	-0.613591	0.592	0.711	1.31661e-24	AL-TB vs. Ctrl	Down-Down
ENO1	AT1	2.3521e-65	-0.838777	0.519	0.711	4.3608e-61	L-TB vs. Ctrl	Down-Down
ENOSF1	AT1	1.02109e-06	-0.258702	0.215	0.291	0.0189311	AL-TB vs. Ctrl	Down-Down
ENOSF1	AT1	1.13459e-12	-0.334672	0.19	0.291	2.10352e-08	L-TB vs. Ctrl	Down-Down
ENPP4	AT1	6.23216e-24	-0.393218	0.193	0.344	1.15544e-19	L-TB vs. Ctrl	Down-Down
ENPP4	AT1	1.47576e-15	-0.332048	0.212	0.344	2.73606e-11	AL-TB vs. Ctrl	Down-Down
EPAS1	AT1	5.17206e-29	-0.534405	0.383	0.556	9.589e-25	L-TB vs. Ctrl	Down-Down
EPAS1	AT1	3.3699e-25	-0.535807	0.384	0.556	6.24779e-21	AL-TB vs. Ctrl	Down-Down
EPB41L3	AT1	3.5021e-19	-0.345827	0.183	0.315	6.4929e-15	L-TB vs. Ctrl	Down-Down
EPB41L3	AT1	2.13402e-12	-0.263653	0.201	0.315	3.95647e-08	AL-TB vs. Ctrl	Down-Down
EPCAM	AT1	7.3977e-26	-0.452222	0.682	0.773	1.37153e-21	L-TB vs. Ctrl	Down-Down
EPCAM	AT1	2.4697e-10	-0.274099	0.682	0.728	4.57883e-06	L-TB vs. AL-TB	Down-Down
EPDR1	AT1	6.57445e-21	-0.303748	0.126	0.263	1.2189e-16	AL-TB vs. Ctrl	Down-Down
EPDR1	AT1	6.59133e-24	-0.310381	0.129	0.263	1.22203e-19	L-TB vs. Ctrl	Down-Down
EPHA2	AT1	1.97581e-12	0.494665	0.244	0.154	3.66315e-08	AL-TB vs. Ctrl	Other
EPHA2	AT1	3.18828e-17	-0.50025	0.134	0.244	5.91106e-13	L-TB vs. AL-TB	Other
EPRS	AT1	1.70325e-17	-0.347417	0.24	0.382	3.15782e-13	AL-TB vs. Ctrl	Down-Down
EPRS	AT1	1.32683e-25	-0.421012	0.221	0.382	2.45995e-21	L-TB vs. Ctrl	Down-Down
EPS15	AT1	4.15214e-11	-0.279072	0.234	0.342	7.69807e-07	AL-TB vs. Ctrl	Down-Down
EREG	AT1	6.90878e-11	-0.642722	0.068	0.14	1.28089e-06	AL-TB vs. Ctrl	Down-Down
EREG	AT1	1.11504e-11	-0.760976	0.071	0.14	2.06729e-07	L-TB vs. Ctrl	Down-Down
ERF	AT1	3.86198e-25	0.485949	0.223	0.101	7.1601e-21	L-TB vs. Ctrl	Up-Up
ERF	AT1	1.18696e-13	0.329582	0.19	0.101	2.20063e-09	AL-TB vs. Ctrl	Up-Up
ERGIC1	AT1	3.40685e-23	-0.480083	0.36	0.524	6.3163e-19	AL-TB vs. Ctrl	Down-Down
ERGIC1	AT1	2.05795e-23	-0.468413	0.37	0.524	3.81544e-19	L-TB vs. Ctrl	Down-Down
ERLEC1	AT1	7.54888e-11	-0.295155	0.297	0.405	1.39956e-06	AL-TB vs. Ctrl	Down-Down
ERO1L	AT1	3.69296e-20	-0.374823	0.17	0.295	6.84676e-16	L-TB vs. Ctrl	Down-Down
ERO1L	AT1	3.29179e-09	-0.258072	0.205	0.295	6.10298e-05	AL-TB vs. Ctrl	Down-Down
ERRFI1	AT1	5.53406e-51	1.09386	0.654	0.507	1.02601e-46	L-TB vs. Ctrl	Up-Up
ERRFI1	AT1	7.72172e-32	0.917139	0.626	0.507	1.43161e-27	AL-TB vs. Ctrl	Up-Up
ESRP1	AT1	3.26151e-13	-0.25881	0.194	0.31	6.04684e-09	AL-TB vs. Ctrl	Down-Down
ESYT3	AT1	1.29351e-18	-0.415096	0.156	0.288	2.39817e-14	AL-TB vs. Ctrl	Down-Down
ESYT3	AT1	2.04575e-21	-0.409903	0.155	0.288	3.79282e-17	L-TB vs. Ctrl	Down-Down
ETS1	AT1	4.38389e-20	0.437345	0.235	0.122	8.12773e-16	L-TB vs. Ctrl	Up-Up
ETS1	AT1	3.01665e-16	0.458	0.224	0.122	5.59287e-12	AL-TB vs. Ctrl	Up-Up
EXOC5	AT1	1.70298e-15	-0.294505	0.139	0.252	3.15733e-11	AL-TB vs. Ctrl	Down-Down
EXOC5	AT1	4.11931e-19	-0.304198	0.135	0.252	7.6372e-15	L-TB vs. Ctrl	Down-Down
EZR	AT1	1.973e-09	0.27882	0.848	0.86	3.65795e-05	AL-TB vs. Ctrl	Other
F3	AT1	8.57701e-49	-1.27892	0.436	0.627	1.59018e-44	L-TB vs. Ctrl	Down-Down
F3	AT1	5.6091e-36	-1.13036	0.447	0.627	1.03993e-31	AL-TB vs. Ctrl	Down-Down
FABP5	AT1	9.35246e-11	0.272927	0.272	0.185	1.73395e-06	L-TB vs. Ctrl	Up-Up
FADS3	AT1	8.78685e-16	-0.397437	0.384	0.515	1.62908e-11	L-TB vs. Ctrl	Other
FAM105A	AT1	1.29134e-35	-0.63196	0.429	0.613	2.39414e-31	AL-TB vs. Ctrl	Down-Down
FAM105A	AT1	3.79574e-19	-0.379612	0.485	0.613	7.03731e-15	L-TB vs. Ctrl	Down-Down
FAM129B	AT1	1.21867e-08	-0.326646	0.357	0.443	0.000225942	L-TB vs. AL-TB	Down-Down
FAM129B	AT1	6.64761e-19	-0.34123	0.357	0.5	1.23247e-14	L-TB vs. Ctrl	Down-Down
FAM133B	AT1	4.0904e-20	0.609877	0.491	0.391	7.58359e-16	L-TB vs. Ctrl	Up-Up
FAM133B	AT1	7.51198e-08	0.450021	0.444	0.391	0.00139272	AL-TB vs. Ctrl	Up-Up
FAM134B	AT1	2.40144e-19	-0.456719	0.186	0.308	4.45227e-15	L-TB vs. Ctrl	Down-Down
FAM134B	AT1	7.65266e-13	-0.414648	0.201	0.308	1.4188e-08	AL-TB vs. Ctrl	Down-Down
FAM135A	AT1	9.89399e-26	-0.38202	0.096	0.223	1.83435e-21	L-TB vs. Ctrl	Down-Down
FAM160B1	AT1	2.02076e-13	-0.255968	0.115	0.215	3.7465e-09	AL-TB vs. Ctrl	Down-Down
FAM167A	AT1	2.34583e-18	-0.336874	0.132	0.256	4.34917e-14	AL-TB vs. Ctrl	Down-Down
FAM167A	AT1	1.96468e-23	-0.347618	0.125	0.256	3.64251e-19	L-TB vs. Ctrl	Down-Down
FAM174B	AT1	8.61501e-15	-0.303331	0.256	0.392	1.59722e-10	AL-TB vs. Ctrl	Other
FAM189A2	AT1	4.10586e-11	0.348608	0.389	0.301	7.61226e-07	L-TB vs. Ctrl	Up-Up
FAM198B	AT1	3.14804e-31	-0.402311	0.103	0.253	5.83648e-27	L-TB vs. Ctrl	Down-Down
FAM198B	AT1	3.9093e-24	-0.35689	0.111	0.253	7.24784e-20	AL-TB vs. Ctrl	Down-Down
FAM199X	AT1	3.46868e-12	-0.25891	0.099	0.186	6.43092e-08	AL-TB vs. Ctrl	Other
FAM20A	AT1	5.72578e-21	-0.362695	0.114	0.23	1.06156e-16	L-TB vs. Ctrl	Down-Down
FAM20A	AT1	4.4024e-17	-0.301107	0.113	0.23	8.16206e-13	AL-TB vs. Ctrl	Down-Down
FAM219B	AT1	1.25517e-31	-0.395535	0.088	0.231	2.32709e-27	L-TB vs. Ctrl	Down-Down
FAM219B	AT1	9.48779e-18	-0.328002	0.113	0.231	1.75904e-13	AL-TB vs. Ctrl	Down-Down
FAM46B	AT1	2.05886e-09	0.456927	0.258	0.184	3.81714e-05	AL-TB vs. Ctrl	Up-Up
FAM46C	AT1	2.46808e-14	0.296257	0.139	0.065	4.57581e-10	L-TB vs. Ctrl	Up-Up
FAR1	AT1	4.08015e-19	-0.363247	0.182	0.325	7.5646e-15	AL-TB vs. Ctrl	Down-Down
FAR1	AT1	5.93435e-25	-0.445136	0.176	0.325	1.10023e-20	L-TB vs. Ctrl	Down-Down
FARP1	AT1	2.73439e-10	-0.306032	0.446	0.547	5.06956e-06	AL-TB vs. Ctrl	Down-Down
FARP1	AT1	1.89244e-11	-0.304649	0.449	0.547	3.50859e-07	L-TB vs. Ctrl	Down-Down
FASN	AT1	3.08399e-20	-0.2879	0.097	0.207	5.71771e-16	L-TB vs. Ctrl	Down-Down
FASN	AT1	1.60685e-15	-0.294153	0.103	0.207	2.9791e-11	AL-TB vs. Ctrl	Down-Down
FAU	AT1	1.0663e-10	0.313417	0.842	0.829	1.97693e-06	AL-TB vs. Ctrl	Up-Up
FAU	AT1	4.69439e-29	0.458007	0.875	0.829	8.70339e-25	L-TB vs. Ctrl	Up-Up
FBP1	AT1	2.18653e-20	-0.43181	0.139	0.26	4.05383e-16	L-TB vs. Ctrl	Down-Down
FBXO9	AT1	3.08165e-13	-0.319197	0.206	0.32	5.71338e-09	AL-TB vs. Ctrl	Down-Down
FBXW5	AT1	2.24461e-10	-0.265554	0.213	0.302	4.16151e-06	L-TB vs. Ctrl	Other
FCHO2	AT1	6.24885e-33	-0.528905	0.236	0.437	1.15854e-28	AL-TB vs. Ctrl	Down-Down
FCHO2	AT1	3.27046e-44	-0.563981	0.217	0.437	6.06343e-40	L-TB vs. Ctrl	Down-Down
FDFT1	AT1	8.34603e-18	-0.45377	0.219	0.35	1.54735e-13	AL-TB vs. Ctrl	Down-Down
FDFT1	AT1	8.03309e-29	-0.465701	0.191	0.35	1.48933e-24	L-TB vs. Ctrl	Down-Down
FDPS	AT1	5.61031e-26	-0.572502	0.231	0.378	1.04015e-21	L-TB vs. Ctrl	Down-Down
FDPS	AT1	5.78743e-19	-0.521847	0.246	0.378	1.07299e-14	AL-TB vs. Ctrl	Down-Down
FHL1	AT1	3.47031e-11	0.637781	0.292	0.21	6.43395e-07	AL-TB vs. Ctrl	Up-Up
FLII	AT1	4.01882e-17	-0.302914	0.213	0.342	7.45089e-13	L-TB vs. Ctrl	Down-Down
FLNA	AT1	1.05286e-09	-0.266954	0.632	0.698	1.95201e-05	L-TB vs. AL-TB	Other
FLOT2	AT1	3.45133e-13	-0.26397	0.101	0.195	6.39876e-09	AL-TB vs. Ctrl	Down-Down
FLRT3	AT1	2.43819e-27	-0.486969	0.476	0.638	4.5204e-23	L-TB vs. Ctrl	Down-Down
FLRT3	AT1	1.45471e-22	-0.436089	0.485	0.638	2.69703e-18	AL-TB vs. Ctrl	Down-Down
FMN1	AT1	1.21206e-17	-0.32202	0.094	0.206	2.24717e-13	AL-TB vs. Ctrl	Down-Down
FMN1	AT1	5.76957e-21	-0.285937	0.093	0.206	1.06968e-16	L-TB vs. Ctrl	Down-Down
FN1	AT1	3.60077e-09	-0.290489	0.426	0.539	6.67582e-05	AL-TB vs. Ctrl	Down-Down
FN1	AT1	4.36558e-20	-0.421626	0.388	0.539	8.09378e-16	L-TB vs. Ctrl	Down-Down
FNDC3B	AT1	6.49487e-15	-0.317908	0.364	0.492	1.20415e-10	L-TB vs. Ctrl	Down-Down
FNDC3B	AT1	2.56418e-09	-0.297489	0.394	0.492	4.75398e-05	AL-TB vs. Ctrl	Down-Down
FOLR1	AT1	5.49719e-13	0.399277	0.746	0.67	1.01918e-08	AL-TB vs. Ctrl	Up-Up
FOS	AT1	5.45011e-138	1.1804	0.909	0.655	1.01045e-133	AL-TB vs. Ctrl	Up-Up
FOS	AT1	6.1236e-234	1.58693	0.932	0.655	1.13532e-229	L-TB vs. Ctrl	Up-Up
FOS	AT1	3.09779e-24	0.406528	0.932	0.909	5.74329e-20	L-TB vs. AL-TB	Up-Up
FOSB	AT1	3.10651e-210	2.04218	0.888	0.505	5.75947e-206	AL-TB vs. Ctrl	Up-Up
FOSB	AT1	9.42272e-287	2.23575	0.898	0.505	1.74697e-282	L-TB vs. Ctrl	Up-Up
FOSL1	AT1	3.19563e-25	0.460154	0.124	0.03	5.92469e-21	AL-TB vs. Ctrl	Up-Up
FOXJ3	AT1	1.07936e-08	-0.281478	0.185	0.271	0.000200114	AL-TB vs. Ctrl	Down-Down
FPGS	AT1	4.40179e-14	-0.266886	0.071	0.148	8.16091e-10	L-TB vs. Ctrl	Down-Down
FTL	AT1	3.33797e-22	-0.670778	0.975	0.986	6.1886e-18	L-TB vs. Ctrl	Down-Down
FTL	AT1	9.68761e-09	-0.402914	0.971	0.986	0.000179608	AL-TB vs. Ctrl	Down-Down
FUS	AT1	1.01085e-20	0.462135	0.696	0.617	1.87411e-16	L-TB vs. Ctrl	Up-Up
FUS	AT1	9.10885e-07	0.342103	0.643	0.617	0.0168878	AL-TB vs. Ctrl	Up-Up
FXYD5	AT1	1.37945e-38	0.683389	0.277	0.114	2.55751e-34	L-TB vs. Ctrl	Up-Up
FXYD5	AT1	8.11958e-18	0.504271	0.219	0.114	1.50537e-13	AL-TB vs. Ctrl	Up-Up
FYN	AT1	2.01065e-18	0.347123	0.166	0.069	3.72775e-14	AL-TB vs. Ctrl	Up-Up
FYN	AT1	3.14172e-25	0.471698	0.181	0.069	5.82474e-21	L-TB vs. Ctrl	Up-Up
G0S2	AT1	3.79632e-16	-0.52208	0.123	0.239	7.03838e-12	AL-TB vs. Ctrl	Down-Down
G3BP1	AT1	1.88865e-14	-0.345067	0.335	0.457	3.50155e-10	L-TB vs. Ctrl	Down-Down
G3BP1	AT1	3.11512e-12	-0.334303	0.343	0.457	5.77544e-08	AL-TB vs. Ctrl	Down-Down
GABARAP	AT1	6.69473e-13	0.348854	0.334	0.241	1.2412e-08	L-TB vs. Ctrl	Up-Up
GABARAPL1	AT1	6.11257e-13	0.426183	0.462	0.378	1.13327e-08	L-TB vs. Ctrl	Up-Up
GADD45A	AT1	2.73968e-07	-0.413795	0.221	0.292	0.00507937	L-TB vs. AL-TB	Up-Up
GADD45A	AT1	4.76917e-28	0.822317	0.292	0.145	8.84204e-24	AL-TB vs. Ctrl	Up-Up
GADD45A	AT1	1.70361e-10	0.408523	0.221	0.145	3.1585e-06	L-TB vs. Ctrl	Up-Up
GADD45B	AT1	1.39964e-12	-0.583738	0.678	0.753	2.59493e-08	L-TB vs. AL-TB	Up-Up
GADD45B	AT1	1.29925e-47	1.13779	0.678	0.529	2.40881e-43	L-TB vs. Ctrl	Up-Up
GADD45B	AT1	2.7001e-87	1.72153	0.753	0.529	5.00599e-83	AL-TB vs. Ctrl	Up-Up
GALC	AT1	1.22267e-21	-0.358901	0.119	0.254	2.26682e-17	AL-TB vs. Ctrl	Down-Down
GALC	AT1	3.56629e-16	-0.292176	0.146	0.254	6.61191e-12	L-TB vs. Ctrl	Down-Down
GALK1	AT1	3.00517e-17	-0.250213	0.104	0.207	5.57159e-13	L-TB vs. Ctrl	Down-Down
GALNT5	AT1	1.86368e-09	-0.309853	0.384	0.492	3.45526e-05	AL-TB vs. Ctrl	Down-Down
GALNT5	AT1	1.80315e-12	-0.363231	0.383	0.492	3.34305e-08	L-TB vs. Ctrl	Down-Down
GART	AT1	2.48706e-13	-0.256384	0.093	0.175	4.61101e-09	L-TB vs. Ctrl	Down-Down
GBP1	AT1	1.10863e-12	0.753812	0.285	0.198	2.0554e-08	L-TB vs. Ctrl	Up-Up
GBP1	AT1	4.26695e-14	0.754554	0.299	0.198	7.91092e-10	AL-TB vs. Ctrl	Up-Up
GBP3	AT1	1.3613e-14	-0.361065	0.135	0.241	2.52386e-10	AL-TB vs. Ctrl	Down-Down
GBP3	AT1	4.04448e-26	-0.442072	0.11	0.241	7.49846e-22	L-TB vs. Ctrl	Down-Down
GCA	AT1	7.27136e-13	-0.330707	0.15	0.257	1.34811e-08	AL-TB vs. Ctrl	Down-Down
GCA	AT1	1.42237e-09	-0.257154	0.17	0.257	2.63707e-05	L-TB vs. Ctrl	Down-Down
GCLM	AT1	1.11108e-11	-0.305478	0.207	0.311	2.05993e-07	AL-TB vs. Ctrl	Down-Down
GCLM	AT1	4.43441e-18	-0.389063	0.193	0.311	8.2214e-14	L-TB vs. Ctrl	Down-Down
GFM1	AT1	4.61e-20	-0.306037	0.101	0.21	8.54694e-16	L-TB vs. Ctrl	Down-Down
GFPT1	AT1	1.09204e-33	-0.490282	0.158	0.326	2.02465e-29	L-TB vs. Ctrl	Down-Down
GFPT1	AT1	3.30781e-19	-0.344745	0.187	0.326	6.13269e-15	AL-TB vs. Ctrl	Down-Down
GGCX	AT1	1.27388e-17	-0.337264	0.138	0.248	2.36178e-13	L-TB vs. Ctrl	Down-Down
GGCX	AT1	3.86022e-13	-0.271767	0.143	0.248	7.15684e-09	AL-TB vs. Ctrl	Down-Down
GGH	AT1	3.93507e-16	0.290843	0.161	0.075	7.29561e-12	L-TB vs. Ctrl	Up-Up
GGT1	AT1	1.79934e-11	-0.271503	0.31	0.433	3.33598e-07	AL-TB vs. Ctrl	Down-Down
GGTLC1	AT1	3.78724e-10	-0.338015	0.35	0.456	7.02153e-06	AL-TB vs. Ctrl	Other
GHITM	AT1	1.86969e-11	-0.325308	0.327	0.423	3.4664e-07	L-TB vs. Ctrl	Down-Down
GIGYF2	AT1	3.12157e-12	-0.257726	0.148	0.25	5.78739e-08	AL-TB vs. Ctrl	Other
GIPC1	AT1	2.85166e-15	-0.30844	0.332	0.463	5.28697e-11	L-TB vs. Ctrl	Down-Down
GLG1	AT1	2.28784e-12	-0.26443	0.196	0.298	4.24166e-08	L-TB vs. Ctrl	Down-Down
GLRX	AT1	5.56017e-22	-0.584214	0.199	0.335	1.03086e-17	L-TB vs. Ctrl	Down-Down
GLRX	AT1	6.51906e-16	-0.528148	0.213	0.335	1.20863e-11	AL-TB vs. Ctrl	Down-Down
GLS	AT1	4.8445e-12	-0.251386	0.609	0.713	8.9817e-08	L-TB vs. Ctrl	Down-Down
GMFG	AT1	2.33578e-10	0.307	0.223	0.146	4.33053e-06	L-TB vs. Ctrl	Up-Up
GNA11	AT1	2.98832e-14	-0.284897	0.218	0.333	5.54034e-10	L-TB vs. Ctrl	Down-Down
GNA11	AT1	9.32332e-10	-0.258424	0.233	0.333	1.72854e-05	AL-TB vs. Ctrl	Down-Down
GNB2L1	AT1	7.60359e-07	0.293891	0.74	0.745	0.0140971	L-TB vs. Ctrl	Other
GNG12	AT1	6.70827e-12	-0.295411	0.21	0.309	1.24371e-07	L-TB vs. Ctrl	Down-Down
GNG12	AT1	1.76234e-08	-0.263123	0.22	0.309	0.000326738	AL-TB vs. Ctrl	Down-Down
GNLY	AT1	2.12455e-61	1.42589	0.375	0.142	3.93891e-57	L-TB vs. Ctrl	Up-Up
GNLY	AT1	2.14481e-15	0.62752	0.375	0.253	3.97647e-11	L-TB vs. AL-TB	Up-Up
GNLY	AT1	2.80203e-16	0.798366	0.253	0.142	5.19497e-12	AL-TB vs. Ctrl	Up-Up
GOLGA3	AT1	1.44262e-17	-0.356686	0.188	0.32	2.67462e-13	AL-TB vs. Ctrl	Down-Down
GOLGA3	AT1	1.39339e-29	-0.420459	0.16	0.32	2.58335e-25	L-TB vs. Ctrl	Down-Down
GOLGA4	AT1	1.84063e-30	-0.5263	0.391	0.567	3.41252e-26	L-TB vs. Ctrl	Down-Down
GOLGA4	AT1	2.91522e-17	-0.372085	0.422	0.567	5.40481e-13	AL-TB vs. Ctrl	Down-Down
GOLGA8A	AT1	1.13675e-06	0.25299	0.539	0.482	0.0210754	AL-TB vs. Ctrl	Up-Up
GOLGA8A	AT1	2.65899e-17	0.450734	0.587	0.482	4.92977e-13	L-TB vs. Ctrl	Up-Up
GORASP2	AT1	1.85097e-11	-0.272514	0.156	0.254	3.43171e-07	AL-TB vs. Ctrl	Down-Down
GORASP2	AT1	2.44977e-15	-0.273593	0.146	0.254	4.54188e-11	L-TB vs. Ctrl	Down-Down
GPBP1	AT1	9.8336e-21	0.54734	0.566	0.459	1.82315e-16	L-TB vs. Ctrl	Up-Up
GPBP1	AT1	1.01395e-11	0.474532	0.528	0.459	1.87987e-07	AL-TB vs. Ctrl	Up-Up
GPNMB	AT1	6.73255e-14	-0.280508	0.049	0.117	1.24821e-09	L-TB vs. Ctrl	Down-Down
GPR116	AT1	2.81632e-37	-0.636848	0.472	0.652	5.22147e-33	AL-TB vs. Ctrl	Down-Down
GPR116	AT1	4.62772e-50	-0.681604	0.452	0.652	8.57979e-46	L-TB vs. Ctrl	Down-Down
GPR183	AT1	1.56945e-23	0.539964	0.174	0.067	2.90975e-19	L-TB vs. Ctrl	Up-Up
GPR183	AT1	1.46042e-06	0.314792	0.115	0.067	0.0270763	AL-TB vs. Ctrl	Up-Up
GPR65	AT1	3.184e-15	0.324321	0.119	0.048	5.90314e-11	L-TB vs. Ctrl	Up-Up
GPR98	AT1	2.77424e-13	-0.257605	0.098	0.185	5.14344e-09	L-TB vs. Ctrl	Other
GPRIN2	AT1	2.28947e-22	-0.400501	0.28	0.438	4.24468e-18	L-TB vs. Ctrl	Down-Down
GPRIN2	AT1	7.71859e-20	-0.407481	0.281	0.438	1.43103e-15	AL-TB vs. Ctrl	Down-Down
GPX1	AT1	2.74421e-07	-0.263421	0.424	0.506	0.00508777	L-TB vs. Ctrl	Down-Down
GRASP	AT1	7.35969e-18	0.371293	0.112	0.037	1.36449e-13	L-TB vs. Ctrl	Up-Up
GRINA	AT1	1.75644e-14	-0.308833	0.16	0.262	3.25643e-10	L-TB vs. Ctrl	Down-Down
GRN	AT1	8.61471e-09	-0.330094	0.445	0.53	0.000159717	L-TB vs. Ctrl	Other
GRSF1	AT1	7.35157e-12	-0.320577	0.189	0.292	1.36298e-07	AL-TB vs. Ctrl	Down-Down
GRSF1	AT1	4.27683e-14	-0.314353	0.186	0.292	7.92925e-10	L-TB vs. Ctrl	Down-Down
GSAP	AT1	1.1453e-10	-0.260823	0.256	0.37	2.12338e-06	AL-TB vs. Ctrl	Other
GSN	AT1	2.36804e-19	-0.394052	0.491	0.643	4.39035e-15	AL-TB vs. Ctrl	Down-Down
GSN	AT1	3.34634e-32	-0.531766	0.481	0.643	6.20411e-28	L-TB vs. Ctrl	Down-Down
GSTM3	AT1	1.2873e-06	0.33619	0.181	0.123	0.0238665	AL-TB vs. Ctrl	Up-Up
GSTM3	AT1	9.36359e-07	0.314546	0.177	0.123	0.0173601	L-TB vs. Ctrl	Up-Up
GSTP1	AT1	3.33487e-16	-0.292734	0.89	0.909	6.18286e-12	L-TB vs. Ctrl	Other
GSTT1	AT1	1.11344e-19	-0.35119	0.067	0.173	2.06431e-15	AL-TB vs. Ctrl	Down-Down
GSTT1	AT1	3.28322e-44	-0.50633	0.035	0.173	6.08709e-40	L-TB vs. Ctrl	Down-Down
GTF2I	AT1	2.10067e-23	-0.467645	0.572	0.696	3.89464e-19	AL-TB vs. Ctrl	Down-Down
GTF2I	AT1	6.55719e-22	-0.423112	0.601	0.696	1.2157e-17	L-TB vs. Ctrl	Down-Down
GYPC	AT1	2.1944e-19	0.336041	0.192	0.089	4.06842e-15	L-TB vs. Ctrl	Up-Up
GZMA	AT1	1.066e-21	0.523354	0.172	0.068	1.97637e-17	L-TB vs. Ctrl	Up-Up
GZMA	AT1	2.89965e-15	0.538834	0.153	0.068	5.37596e-11	AL-TB vs. Ctrl	Up-Up
GZMB	AT1	3.76154e-13	0.443352	0.172	0.09	6.9739e-09	L-TB vs. Ctrl	Up-Up
GZMH	AT1	8.86771e-11	0.428831	0.108	0.048	1.64407e-06	AL-TB vs. Ctrl	Up-Up
GZMH	AT1	3.29846e-15	0.356954	0.121	0.048	6.11534e-11	L-TB vs. Ctrl	Up-Up
GZMK	AT1	2.55668e-09	0.303564	0.144	0.078	4.74008e-05	L-TB vs. AL-TB	Up-Up
GZMK	AT1	2.53759e-44	0.791006	0.144	0.017	4.70468e-40	L-TB vs. Ctrl	Up-Up
GZMM	AT1	2.13489e-12	0.2944	0.118	0.051	3.95809e-08	AL-TB vs. Ctrl	Up-Up
GZMM	AT1	5.02258e-19	0.321479	0.137	0.051	9.31186e-15	L-TB vs. Ctrl	Up-Up
H1F0	AT1	1.40539e-08	-0.270004	0.08	0.139	0.00026056	L-TB vs. Ctrl	Down-Down
H1F0	AT1	3.88785e-07	-0.286278	0.083	0.139	0.00720807	AL-TB vs. Ctrl	Down-Down
H1FX	AT1	1.61504e-07	0.299028	0.494	0.433	0.00299429	L-TB vs. Ctrl	Up-Up
H2AFJ	AT1	3.14302e-15	-0.349677	0.351	0.486	5.82715e-11	AL-TB vs. Ctrl	Down-Down
H2AFY	AT1	4.00578e-09	-0.257456	0.434	0.525	7.42671e-05	L-TB vs. Ctrl	Other
H3F3A	AT1	4.03202e-17	0.298146	0.854	0.809	7.47537e-13	AL-TB vs. Ctrl	Up-Up
H3F3A	AT1	7.55636e-21	0.276988	0.855	0.809	1.40095e-16	L-TB vs. Ctrl	Up-Up
H3F3B	AT1	8.23133e-51	0.469421	0.958	0.92	1.52609e-46	AL-TB vs. Ctrl	Up-Up
H3F3B	AT1	3.00646e-66	0.462512	0.971	0.92	5.57397e-62	L-TB vs. Ctrl	Up-Up
HADHA	AT1	5.38013e-11	-0.337181	0.318	0.421	9.97476e-07	AL-TB vs. Ctrl	Down-Down
HADHA	AT1	4.05872e-17	-0.385345	0.295	0.421	7.52486e-13	L-TB vs. Ctrl	Down-Down
HBA1	AT1	5.14371e-52	1.64809	0.271	0.066	9.53645e-48	L-TB vs. AL-TB	Up-Up
HBA1	AT1	4.45996e-57	2.43562	0.271	0.074	8.26876e-53	L-TB vs. Ctrl	Up-Up
HBA2	AT1	1.55205e-87	1.80762	0.448	0.135	2.87751e-83	L-TB vs. AL-TB	Up-Up
HBA2	AT1	2.25829e-124	3.18564	0.448	0.108	4.18688e-120	L-TB vs. Ctrl	Up-Up
HBB	AT1	1.23903e-107	1.80115	0.539	0.192	2.29715e-103	L-TB vs. AL-TB	Up-Up
HBB	AT1	7.16504e-169	1.98328	0.539	0.124	1.3284e-164	L-TB vs. Ctrl	Up-Up
HBEGF	AT1	3.33145e-28	0.778949	0.589	0.453	6.17651e-24	AL-TB vs. Ctrl	Up-Up
HBEGF	AT1	8.06383e-44	0.822815	0.626	0.453	1.49503e-39	L-TB vs. Ctrl	Up-Up
HCST	AT1	5.66404e-13	0.460559	0.228	0.136	1.05011e-08	AL-TB vs. Ctrl	Up-Up
HCST	AT1	8.61546e-17	0.430286	0.239	0.136	1.59731e-12	L-TB vs. Ctrl	Up-Up
HDLBP	AT1	9.91858e-09	-0.271047	0.288	0.369	0.000183891	L-TB vs. Ctrl	Down-Down
HECTD1	AT1	2.52075e-13	-0.254227	0.278	0.393	4.67347e-09	L-TB vs. Ctrl	Down-Down
HECTD4	AT1	2.79554e-12	-0.269373	0.145	0.237	5.18293e-08	L-TB vs. Ctrl	Down-Down
HEG1	AT1	2.92948e-11	-0.312877	0.339	0.459	5.43125e-07	AL-TB vs. Ctrl	Down-Down
HEG1	AT1	2.73187e-15	-0.376651	0.338	0.459	5.06489e-11	L-TB vs. Ctrl	Down-Down
HERC2	AT1	1.94635e-11	-0.25102	0.153	0.254	3.60853e-07	AL-TB vs. Ctrl	Down-Down
HERPUD1	AT1	3.75113e-09	0.341132	0.545	0.479	6.95459e-05	L-TB vs. Ctrl	Up-Up
HES1	AT1	1.39664e-08	0.375207	0.215	0.143	0.000258937	AL-TB vs. Ctrl	Up-Up
HES1	AT1	1.0465e-08	0.506337	0.209	0.143	0.000194022	L-TB vs. Ctrl	Up-Up
HEXIM1	AT1	4.55036e-17	0.51486	0.348	0.237	8.43637e-13	L-TB vs. Ctrl	Up-Up
HGS	AT1	8.98302e-13	-0.261547	0.163	0.258	1.66545e-08	L-TB vs. Ctrl	Down-Down
HGSNAT	AT1	3.51749e-08	-0.260796	0.172	0.244	0.000652144	L-TB vs. Ctrl	Down-Down
HIATL1	AT1	6.90058e-13	-0.251609	0.17	0.271	1.27937e-08	L-TB vs. Ctrl	Down-Down
HIF1A	AT1	4.98382e-14	-0.381921	0.227	0.344	9.24e-10	AL-TB vs. Ctrl	Down-Down
HIF1A	AT1	8.8713e-11	-0.314548	0.249	0.344	1.64474e-06	L-TB vs. Ctrl	Down-Down
HIGD2A	AT1	2.14037e-09	0.301193	0.372	0.29	3.96824e-05	AL-TB vs. Ctrl	Up-Up
HIGD2A	AT1	8.43752e-16	0.427463	0.394	0.29	1.56432e-11	L-TB vs. Ctrl	Up-Up
HIP1	AT1	3.25617e-18	-0.359965	0.209	0.335	6.03695e-14	L-TB vs. Ctrl	Down-Down
HIST1H1C	AT1	5.65246e-23	-0.50791	0.233	0.397	1.04797e-18	AL-TB vs. Ctrl	Down-Down
HIST1H1C	AT1	1.81653e-17	-0.347373	0.26	0.397	3.36784e-13	L-TB vs. Ctrl	Down-Down
HK1	AT1	6.64187e-22	-0.305708	0.109	0.228	1.2314e-17	L-TB vs. Ctrl	Down-Down
HLA-A	AT1	2.36258e-42	0.709641	0.78	0.662	4.38023e-38	AL-TB vs. Ctrl	Up-Up
HLA-A	AT1	2.14814e-46	0.701509	0.785	0.662	3.98265e-42	L-TB vs. Ctrl	Up-Up
HLA-B	AT1	1.57371e-07	-0.409656	0.568	0.622	0.00291766	L-TB vs. AL-TB	Other
HLA-DPA1	AT1	1.08383e-08	0.294483	0.386	0.306	0.000200942	L-TB vs. Ctrl	Up-Up
HLA-DPA1	AT1	1.57829e-10	0.525757	0.393	0.306	2.92614e-06	AL-TB vs. Ctrl	Up-Up
HLA-DPB1	AT1	1.13115e-10	0.332761	0.302	0.214	2.09716e-06	L-TB vs. Ctrl	Other
HLA-DPB1	AT1	4.82718e-09	0.505503	0.296	0.214	8.9496e-05	AL-TB vs. Ctrl	Other
HLA-DQA1	AT1	3.34022e-09	0.484673	0.119	0.063	6.19277e-05	AL-TB vs. Ctrl	Other
HLA-DRA	AT1	5.56589e-12	0.411394	0.609	0.512	1.03192e-07	L-TB vs. Ctrl	Up-Up
HLA-DRA	AT1	6.47441e-10	0.589426	0.584	0.512	1.20035e-05	AL-TB vs. Ctrl	Up-Up
HLA-E	AT1	1.57886e-06	0.327429	0.706	0.698	0.029272	AL-TB vs. Ctrl	Up-Up
HMGCR	AT1	5.00054e-22	-0.538145	0.157	0.295	9.271e-18	AL-TB vs. Ctrl	Down-Down
HMGCR	AT1	1.41562e-31	-0.5586	0.141	0.295	2.62456e-27	L-TB vs. Ctrl	Down-Down
HMGCS1	AT1	6.67188e-21	-0.738458	0.192	0.313	1.23697e-16	L-TB vs. Ctrl	Down-Down
HMGCS1	AT1	1.21681e-29	-0.83798	0.151	0.313	2.25597e-25	AL-TB vs. Ctrl	Down-Down
HMGN2	AT1	2.09225e-10	0.288224	0.592	0.521	3.87903e-06	L-TB vs. Ctrl	Up-Up
HMGXB3	AT1	2.31969e-09	-0.263019	0.073	0.138	4.3007e-05	AL-TB vs. Ctrl	Down-Down
HNRNPA0	AT1	1.48345e-18	0.410317	0.496	0.374	2.75032e-14	AL-TB vs. Ctrl	Up-Up
HNRNPA0	AT1	1.1415e-32	0.533778	0.531	0.374	2.11634e-28	L-TB vs. Ctrl	Up-Up
HNRNPA2B1	AT1	5.33479e-07	0.257482	0.847	0.834	0.0098907	AL-TB vs. Ctrl	Up-Up
HNRNPA2B1	AT1	9.26687e-13	0.273547	0.862	0.834	1.71808e-08	L-TB vs. Ctrl	Up-Up
HNRNPH1	AT1	1.0647e-07	0.261112	0.69	0.626	0.00197395	L-TB vs. AL-TB	Other
HNRNPL	AT1	5.97125e-12	0.385448	0.364	0.282	1.10707e-07	L-TB vs. Ctrl	Up-Up
HNRNPL	AT1	2.91148e-07	0.308301	0.349	0.282	0.00539788	AL-TB vs. Ctrl	Up-Up
HNRNPR	AT1	8.15589e-09	-0.284799	0.361	0.463	0.00015121	AL-TB vs. Ctrl	Down-Down
HNRNPR	AT1	2.84515e-10	-0.270572	0.363	0.463	5.27491e-06	L-TB vs. Ctrl	Down-Down
HOOK3	AT1	6.1878e-17	-0.360923	0.323	0.451	1.14722e-12	L-TB vs. Ctrl	Down-Down
HOOK3	AT1	4.03875e-13	-0.317045	0.33	0.451	7.48785e-09	AL-TB vs. Ctrl	Down-Down
HOPX	AT1	3.01394e-72	-0.704316	0.885	0.96	5.58784e-68	AL-TB vs. Ctrl	Down-Down
HOPX	AT1	1.24282e-55	-0.534042	0.864	0.96	2.30418e-51	L-TB vs. Ctrl	Down-Down
HPCAL1	AT1	5.90712e-18	-0.332596	0.469	0.623	1.09518e-13	AL-TB vs. Ctrl	Other
HSD17B11	AT1	5.55558e-08	0.277916	0.45	0.379	0.00103001	L-TB vs. Ctrl	Up-Up
HSD17B12	AT1	6.88819e-24	-0.408732	0.23	0.38	1.27707e-19	L-TB vs. Ctrl	Down-Down
HSD17B4	AT1	1.36402e-19	-0.373255	0.242	0.393	2.5289e-15	AL-TB vs. Ctrl	Down-Down
HSD17B4	AT1	3.33712e-20	-0.374697	0.25	0.393	6.18702e-16	L-TB vs. Ctrl	Down-Down
HSP90AA1	AT1	4.77012e-91	1.01509	0.949	0.886	8.84381e-87	AL-TB vs. Ctrl	Up-Up
HSP90AA1	AT1	4.8266e-115	0.855224	0.962	0.886	8.94852e-111	L-TB vs. Ctrl	Up-Up
HSP90AB1	AT1	1.7151e-18	0.337988	0.912	0.882	3.17979e-14	L-TB vs. Ctrl	Up-Up
HSP90AB1	AT1	4.18935e-17	0.367166	0.915	0.882	7.76706e-13	AL-TB vs. Ctrl	Up-Up
HSPA1A	AT1	2.6946e-142	1.748	0.801	0.453	4.99579e-138	L-TB vs. Ctrl	Up-Up
HSPA1A	AT1	6.92989e-127	1.85494	0.799	0.453	1.2848e-122	AL-TB vs. Ctrl	Up-Up
HSPA1B	AT1	2.39816e-93	1.80653	0.626	0.3	4.44619e-89	AL-TB vs. Ctrl	Up-Up
HSPA1B	AT1	3.41912e-126	1.68997	0.669	0.3	6.33904e-122	L-TB vs. Ctrl	Up-Up
HSPA5	AT1	1.85128e-11	-0.331875	0.556	0.639	3.43228e-07	L-TB vs. Ctrl	Other
HSPA6	AT1	2.4219e-33	1.46065	0.144	0.028	4.4902e-29	AL-TB vs. Ctrl	Up-Up
HSPA6	AT1	2.00895e-23	1.11588	0.114	0.028	3.72459e-19	L-TB vs. Ctrl	Up-Up
HSPA8	AT1	5.56807e-21	0.432306	0.718	0.634	1.03232e-16	AL-TB vs. Ctrl	Up-Up
HSPA8	AT1	1.40997e-24	0.441948	0.725	0.634	2.61409e-20	L-TB vs. Ctrl	Up-Up
HSPB1	AT1	5.18406e-109	1.18369	0.791	0.529	9.61125e-105	L-TB vs. Ctrl	Up-Up
HSPB1	AT1	1.63368e-80	1.12354	0.768	0.529	3.02885e-76	AL-TB vs. Ctrl	Up-Up
HSPE1	AT1	3.14703e-22	0.794311	0.621	0.53	5.83458e-18	AL-TB vs. Ctrl	Up-Up
HSPE1	AT1	1.19895e-22	0.618968	0.622	0.53	2.22285e-18	L-TB vs. Ctrl	Up-Up
HSPH1	AT1	7.82537e-27	0.957537	0.435	0.3	1.45082e-22	L-TB vs. Ctrl	Up-Up
HSPH1	AT1	6.30715e-22	1.01622	0.424	0.3	1.16935e-17	AL-TB vs. Ctrl	Up-Up
HTT	AT1	7.43923e-14	-0.262177	0.169	0.274	1.37923e-09	L-TB vs. Ctrl	Down-Down
HUWE1	AT1	3.8569e-08	-0.256037	0.243	0.323	0.00071507	L-TB vs. Ctrl	Down-Down
HYAL2	AT1	1.22678e-06	-0.272813	0.172	0.238	0.0227445	L-TB vs. AL-TB	Down-Down
IARS	AT1	1.70998e-25	-0.428759	0.111	0.255	3.1703e-21	AL-TB vs. Ctrl	Down-Down
IARS	AT1	1.71224e-28	-0.457568	0.115	0.255	3.17449e-24	L-TB vs. Ctrl	Down-Down
IARS2	AT1	2.03394e-18	-0.28854	0.168	0.291	3.77092e-14	L-TB vs. Ctrl	Down-Down
IARS2	AT1	2.40953e-18	-0.347723	0.161	0.291	4.46727e-14	AL-TB vs. Ctrl	Down-Down
IBTK	AT1	4.46571e-26	-0.362755	0.167	0.319	8.27942e-22	L-TB vs. Ctrl	Down-Down
ICAM1	AT1	4.46297e-22	0.572855	0.86	0.797	8.27434e-18	AL-TB vs. Ctrl	Other
ICAM1	AT1	5.82574e-42	-0.881671	0.769	0.86	1.08009e-37	L-TB vs. AL-TB	Other
ICAM4	AT1	8.20056e-13	0.490487	0.197	0.112	1.52038e-08	AL-TB vs. Ctrl	Up-Up
ICAM4	AT1	7.38076e-13	0.351024	0.194	0.112	1.36839e-08	L-TB vs. Ctrl	Up-Up
ID1	AT1	2.12779e-33	-0.479148	0.585	0.734	3.94492e-29	L-TB vs. Ctrl	Down-Down
ID2	AT1	1.22096e-17	0.498486	0.319	0.198	2.26366e-13	AL-TB vs. Ctrl	Up-Up
ID2	AT1	3.67381e-37	0.695002	0.374	0.198	6.81125e-33	L-TB vs. Ctrl	Up-Up
ID3	AT1	3.18428e-07	0.260451	0.542	0.488	0.00590365	L-TB vs. Ctrl	Up-Up
ID3	AT1	5.95017e-09	0.325192	0.542	0.447	0.000110316	L-TB vs. AL-TB	Up-Up
ID4	AT1	1.78913e-10	-0.35024	0.372	0.492	3.31705e-06	AL-TB vs. Ctrl	Down-Down
IDI1	AT1	5.7023e-19	-0.502935	0.252	0.392	1.05721e-14	AL-TB vs. Ctrl	Down-Down
IDI1	AT1	1.17252e-14	-0.425754	0.279	0.392	2.17385e-10	L-TB vs. Ctrl	Down-Down
IER2	AT1	2.84917e-121	1.25102	0.789	0.499	5.28236e-117	L-TB vs. Ctrl	Up-Up
IER2	AT1	6.44846e-08	0.250973	0.789	0.759	0.00119554	L-TB vs. AL-TB	Up-Up
IER2	AT1	2.65397e-74	1.00004	0.759	0.499	4.92045e-70	AL-TB vs. Ctrl	Up-Up
IER3	AT1	1.90504e-17	0.694525	0.5	0.402	3.53195e-13	L-TB vs. Ctrl	Up-Up
IER3	AT1	7.05869e-28	0.884497	0.543	0.402	1.30868e-23	AL-TB vs. Ctrl	Up-Up
IER5	AT1	1.44687e-23	0.461815	0.245	0.122	2.6825e-19	L-TB vs. Ctrl	Up-Up
IER5	AT1	2.82634e-17	0.434228	0.228	0.122	5.24003e-13	AL-TB vs. Ctrl	Up-Up
IER5L	AT1	9.3215e-09	0.304229	0.12	0.064	0.000172821	AL-TB vs. Ctrl	Up-Up
IER5L	AT1	7.5016e-17	0.347196	0.147	0.064	1.3908e-12	L-TB vs. Ctrl	Up-Up
IFI16	AT1	3.62251e-18	0.3297	0.207	0.104	6.71612e-14	L-TB vs. Ctrl	Up-Up
IFI27	AT1	1.22568e-08	-0.327398	0.628	0.699	0.000227241	L-TB vs. AL-TB	Other
IFI44L	AT1	2.35378e-11	0.611975	0.149	0.078	4.36391e-07	AL-TB vs. Ctrl	Other
IFI44L	AT1	9.27554e-09	0.661751	0.133	0.078	0.000171968	L-TB vs. Ctrl	Other
IFITM1	AT1	6.15606e-24	0.371919	0.168	0.061	1.14133e-19	L-TB vs. Ctrl	Up-Up
IFITM2	AT1	1.32063e-10	0.288874	0.564	0.461	2.44845e-06	L-TB vs. AL-TB	Up-Up
IFNAR2	AT1	1.45087e-10	-0.328127	0.18	0.267	2.68991e-06	L-TB vs. AL-TB	Other
IFNGR1	AT1	4.99604e-27	-0.529613	0.418	0.571	9.26266e-23	L-TB vs. Ctrl	Down-Down
IFNGR1	AT1	3.00216e-29	-0.593142	0.391	0.571	5.566e-25	AL-TB vs. Ctrl	Down-Down
IFRD1	AT1	4.73476e-28	0.681782	0.438	0.288	8.77825e-24	L-TB vs. Ctrl	Up-Up
IFRD1	AT1	5.16313e-09	0.463718	0.364	0.288	9.57244e-05	AL-TB vs. Ctrl	Up-Up
IGF2R	AT1	1.72015e-11	-0.251119	0.283	0.397	3.18916e-07	AL-TB vs. Ctrl	Down-Down
IGF2R	AT1	1.13762e-25	-0.362915	0.231	0.397	2.10914e-21	L-TB vs. Ctrl	Down-Down
IGFBP7	AT1	2.12734e-07	-0.450241	0.663	0.704	0.00394408	L-TB vs. AL-TB	Down-Down
IGFBP7	AT1	2.49088e-07	-0.270409	0.663	0.727	0.00461808	L-TB vs. Ctrl	Down-Down
IGJ	AT1	2.87548e-72	1.35977	0.195	0.011	5.33114e-68	L-TB vs. Ctrl	Up-Up
IGJ	AT1	9.62799e-21	0.612147	0.195	0.083	1.78503e-16	L-TB vs. AL-TB	Up-Up
IGLL5	AT1	1.02427e-50	0.908158	0.279	0.076	1.899e-46	L-TB vs. AL-TB	Up-Up
IGLL5	AT1	1.94068e-102	1.17591	0.279	0.021	3.59802e-98	L-TB vs. Ctrl	Up-Up
IL1B	AT1	7.18867e-07	-0.525829	0.27	0.355	0.0133278	AL-TB vs. Ctrl	Down-Down
IL1B	AT1	2.36533e-06	-0.677556	0.283	0.355	0.0438532	L-TB vs. Ctrl	Down-Down
IL1R1	AT1	2.71737e-18	-0.501783	0.163	0.275	5.038e-14	L-TB vs. Ctrl	Down-Down
IL1R1	AT1	3.30544e-09	-0.303114	0.185	0.275	6.12829e-05	AL-TB vs. Ctrl	Down-Down
IL2RG	AT1	8.01799e-21	0.459051	0.18	0.073	1.48654e-16	AL-TB vs. Ctrl	Up-Up
IL2RG	AT1	2.70078e-30	0.572446	0.201	0.073	5.00725e-26	L-TB vs. Ctrl	Up-Up
IL32	AT1	8.00357e-13	-0.330495	0.7	0.776	1.48386e-08	L-TB vs. AL-TB	Up-Up
IL32	AT1	2.85681e-26	0.708878	0.7	0.636	5.29653e-22	L-TB vs. Ctrl	Up-Up
IL32	AT1	1.18122e-65	1.03937	0.776	0.636	2.18997e-61	AL-TB vs. Ctrl	Up-Up
IL6R	AT1	3.98582e-07	-0.331372	0.321	0.392	0.00738971	L-TB vs. AL-TB	Down-Down
IL7R	AT1	2.02644e-36	0.946601	0.29	0.128	3.75702e-32	L-TB vs. Ctrl	Up-Up
IL7R	AT1	1.41593e-11	0.618406	0.21	0.128	2.62514e-07	AL-TB vs. Ctrl	Up-Up
IL7R	AT1	2.14098e-07	0.328195	0.29	0.21	0.00396938	L-TB vs. AL-TB	Up-Up
IL8	AT1	6.27218e-23	-0.69351	0.316	0.485	1.16286e-18	AL-TB vs. Ctrl	Other
IL8	AT1	3.10149e-25	0.551265	0.491	0.316	5.75017e-21	L-TB vs. AL-TB	Other
IMMT	AT1	1.23213e-18	-0.301931	0.141	0.258	2.28437e-14	L-TB vs. Ctrl	Down-Down
IMPAD1	AT1	1.81799e-19	-0.430908	0.21	0.352	3.37055e-15	AL-TB vs. Ctrl	Down-Down
IMPAD1	AT1	2.70029e-31	-0.482093	0.185	0.352	5.00633e-27	L-TB vs. Ctrl	Down-Down
INSIG1	AT1	1.89213e-08	-0.253896	0.14	0.216	0.000350801	AL-TB vs. Ctrl	Down-Down
INSIG2	AT1	6.58923e-19	-0.339793	0.171	0.295	1.22164e-14	L-TB vs. Ctrl	Down-Down
INTS6	AT1	1.79339e-08	0.316096	0.231	0.165	0.000332494	L-TB vs. Ctrl	Up-Up
IPO5	AT1	1.16159e-21	-0.352031	0.146	0.273	2.15359e-17	L-TB vs. Ctrl	Down-Down
IPO7	AT1	6.29909e-21	-0.461688	0.257	0.413	1.16785e-16	AL-TB vs. Ctrl	Down-Down
IPO7	AT1	1.38057e-23	-0.435473	0.261	0.413	2.55957e-19	L-TB vs. Ctrl	Down-Down
IRAK1	AT1	9.85455e-14	-0.257409	0.082	0.161	1.82703e-09	L-TB vs. Ctrl	Other
IRF1	AT1	9.25214e-07	-0.43614	0.516	0.567	0.0171535	L-TB vs. AL-TB	Up-Up
IRF1	AT1	4.89774e-42	1.07527	0.567	0.39	9.08041e-38	AL-TB vs. Ctrl	Up-Up
IRF1	AT1	1.96753e-23	0.639133	0.516	0.39	3.64781e-19	L-TB vs. Ctrl	Up-Up
IRX2	AT1	2.40666e-08	-0.267019	0.519	0.593	0.000446194	AL-TB vs. Ctrl	Other
ISG20	AT1	2.83623e-12	0.488959	0.42	0.335	5.25836e-08	AL-TB vs. Ctrl	Up-Up
ISG20	AT1	2.24027e-25	0.616087	0.466	0.335	4.15347e-21	L-TB vs. Ctrl	Up-Up
ITCH	AT1	4.69047e-15	-0.318612	0.153	0.258	8.69613e-11	L-TB vs. Ctrl	Down-Down
ITGA2	AT1	1.88746e-13	-0.634574	0.175	0.269	3.49935e-09	L-TB vs. AL-TB	Down-Down
ITGA2	AT1	1.22882e-51	-1.18203	0.175	0.377	2.27823e-47	L-TB vs. Ctrl	Down-Down
ITGA2	AT1	2.41087e-12	-0.547454	0.269	0.377	4.46976e-08	AL-TB vs. Ctrl	Down-Down
ITGA3	AT1	8.08734e-10	-0.303983	0.592	0.676	1.49939e-05	AL-TB vs. Ctrl	Down-Down
ITGA3	AT1	3.80919e-23	-0.495516	0.557	0.676	7.06225e-19	L-TB vs. Ctrl	Down-Down
ITGAV	AT1	4.85277e-08	-0.359434	0.183	0.253	0.000899704	L-TB vs. AL-TB	Down-Down
ITGAV	AT1	5.71359e-25	-0.471342	0.183	0.329	1.0593e-20	L-TB vs. Ctrl	Down-Down
ITGB1	AT1	3.0368e-13	-0.27103	0.719	0.787	5.63022e-09	L-TB vs. Ctrl	Other
ITGB6	AT1	1.27311e-08	-0.527525	0.41	0.474	0.000236035	L-TB vs. AL-TB	Down-Down
ITGB6	AT1	3.43709e-36	-0.639986	0.41	0.589	6.37237e-32	L-TB vs. Ctrl	Down-Down
ITM2A	AT1	3.86594e-17	0.328327	0.11	0.035	7.16745e-13	AL-TB vs. Ctrl	Up-Up
ITM2A	AT1	7.92516e-33	0.432456	0.15	0.035	1.46932e-28	L-TB vs. Ctrl	Up-Up
ITM2B	AT1	8.34868e-33	0.364755	0.925	0.869	1.54785e-28	L-TB vs. Ctrl	Up-Up
ITM2B	AT1	7.04834e-18	0.286599	0.908	0.869	1.30676e-13	AL-TB vs. Ctrl	Up-Up
ITPKC	AT1	2.74422e-18	0.825839	0.292	0.181	5.08779e-14	AL-TB vs. Ctrl	Other
ITPKC	AT1	1.05647e-07	-0.443763	0.22	0.292	0.0019587	L-TB vs. AL-TB	Other
ITPR3	AT1	3.01239e-10	-0.278334	0.272	0.381	5.58497e-06	AL-TB vs. Ctrl	Down-Down
ITPR3	AT1	1.32728e-14	-0.278547	0.258	0.381	2.46077e-10	L-TB vs. Ctrl	Down-Down
ITPRIPL2	AT1	1.37666e-10	-0.280879	0.226	0.328	2.55233e-06	AL-TB vs. Ctrl	Down-Down
ITPRIPL2	AT1	1.34716e-18	-0.358423	0.199	0.328	2.49763e-14	L-TB vs. Ctrl	Down-Down
ITSN2	AT1	2.02966e-20	-0.387451	0.253	0.396	3.76299e-16	L-TB vs. Ctrl	Down-Down
ITSN2	AT1	2.21517e-14	-0.312558	0.266	0.396	4.10692e-10	AL-TB vs. Ctrl	Down-Down
IVD	AT1	8.82071e-13	-0.293645	0.144	0.244	1.63536e-08	AL-TB vs. Ctrl	Down-Down
IVD	AT1	3.73778e-19	-0.27848	0.128	0.244	6.92985e-15	L-TB vs. Ctrl	Down-Down
JUN	AT1	1.25599e-22	0.408673	0.913	0.857	2.3286e-18	L-TB vs. AL-TB	Up-Up
JUN	AT1	2.60372e-76	1.17522	0.857	0.709	4.82729e-72	AL-TB vs. Ctrl	Up-Up
JUN	AT1	3.67176e-185	1.58389	0.913	0.709	6.80744e-181	L-TB vs. Ctrl	Up-Up
JUNB	AT1	1.54911e-193	1.62457	0.851	0.56	2.87206e-189	L-TB vs. Ctrl	Up-Up
JUNB	AT1	3.16901e-130	1.39673	0.831	0.56	5.87535e-126	AL-TB vs. Ctrl	Up-Up
JUND	AT1	2.34505e-232	1.45222	0.97	0.863	4.34772e-228	AL-TB vs. Ctrl	Up-Up
JUND	AT1	0	1.66484	0.976	0.863	0	L-TB vs. Ctrl	Up-Up
KANK2	AT1	3.17192e-13	-0.288205	0.225	0.346	5.88074e-09	AL-TB vs. Ctrl	Down-Down
KCNQ3	AT1	8.23117e-43	-0.443822	0.008	0.118	1.52606e-38	L-TB vs. Ctrl	Down-Down
KCNQ3	AT1	1.1442e-30	-0.442989	0.013	0.118	2.12134e-26	AL-TB vs. Ctrl	Down-Down
KDELR2	AT1	3.17705e-11	-0.251273	0.308	0.412	5.89025e-07	L-TB vs. Ctrl	Down-Down
KDM6B	AT1	5.23788e-44	0.952071	0.469	0.26	9.71103e-40	AL-TB vs. Ctrl	Up-Up
KDM6B	AT1	3.02082e-08	-0.464276	0.39	0.469	0.000560059	L-TB vs. AL-TB	Up-Up
KDM6B	AT1	1.04298e-20	0.487795	0.39	0.26	1.93368e-16	L-TB vs. Ctrl	Up-Up
KDSR	AT1	1.83486e-11	-0.284474	0.283	0.402	3.40183e-07	AL-TB vs. Ctrl	Down-Down
KIAA0020	AT1	4.22933e-19	-0.343613	0.143	0.262	7.84117e-15	L-TB vs. Ctrl	Down-Down
KIAA0020	AT1	1.03627e-21	-0.40721	0.126	0.262	1.92125e-17	AL-TB vs. Ctrl	Down-Down
KIAA0368	AT1	1.43893e-15	-0.312961	0.176	0.288	2.66777e-11	L-TB vs. Ctrl	Down-Down
KIAA1033	AT1	1.17129e-15	-0.323632	0.201	0.329	2.17158e-11	AL-TB vs. Ctrl	Down-Down
KIAA1033	AT1	2.47652e-15	-0.294525	0.211	0.329	4.59147e-11	L-TB vs. Ctrl	Down-Down
KIAA1109	AT1	1.78141e-17	-0.387354	0.358	0.495	3.30274e-13	L-TB vs. Ctrl	Down-Down
KIAA1109	AT1	4.2878e-18	-0.425584	0.353	0.495	7.94958e-14	AL-TB vs. Ctrl	Down-Down
KIAA1430	AT1	8.31872e-14	-0.338707	0.285	0.411	1.54229e-09	AL-TB vs. Ctrl	Down-Down
KIAA1430	AT1	7.47154e-11	-0.254591	0.308	0.411	1.38522e-06	L-TB vs. Ctrl	Down-Down
KIAA1598	AT1	6.33625e-24	-0.440602	0.309	0.487	1.17474e-19	AL-TB vs. Ctrl	Down-Down
KIAA1598	AT1	6.08397e-35	-0.533259	0.283	0.487	1.12797e-30	L-TB vs. Ctrl	Down-Down
KIF1B	AT1	2.15523e-18	-0.298547	0.234	0.372	3.9958e-14	L-TB vs. Ctrl	Down-Down
KIF1C	AT1	1.16927e-16	-0.31298	0.173	0.291	2.16782e-12	L-TB vs. Ctrl	Other
KIFC3	AT1	1.73718e-10	-0.278738	0.178	0.274	3.22073e-06	AL-TB vs. Ctrl	Other
KLC1	AT1	5.49416e-14	-0.293365	0.19	0.309	1.01862e-09	AL-TB vs. Ctrl	Down-Down
KLC1	AT1	1.10395e-16	-0.26105	0.187	0.309	2.04673e-12	L-TB vs. Ctrl	Down-Down
KLF10	AT1	3.46792e-09	-0.436562	0.487	0.556	6.42953e-05	L-TB vs. AL-TB	Up-Up
KLF10	AT1	1.15665e-48	0.997551	0.556	0.357	2.14442e-44	AL-TB vs. Ctrl	Up-Up
KLF10	AT1	5.57817e-24	0.560989	0.487	0.357	1.03419e-19	L-TB vs. Ctrl	Up-Up
KLF2	AT1	2.85327e-21	0.474039	0.669	0.519	5.28997e-17	L-TB vs. AL-TB	Up-Up
KLF2	AT1	2.15803e-51	1.10249	0.519	0.298	4.00099e-47	AL-TB vs. Ctrl	Up-Up
KLF2	AT1	1.43023e-144	1.57653	0.669	0.298	2.65165e-140	L-TB vs. Ctrl	Up-Up
KLF4	AT1	1.58333e-08	0.2958	0.202	0.136	0.000293549	L-TB vs. Ctrl	Up-Up
KLF6	AT1	7.09462e-111	1.04246	0.926	0.859	1.31534e-106	L-TB vs. Ctrl	Up-Up
KLF6	AT1	6.51888e-71	0.942194	0.916	0.859	1.2086e-66	AL-TB vs. Ctrl	Up-Up
KLF9	AT1	1.0512e-09	0.42732	0.397	0.322	1.94892e-05	AL-TB vs. Ctrl	Up-Up
KLF9	AT1	3.81899e-21	0.576445	0.439	0.322	7.0804e-17	L-TB vs. Ctrl	Up-Up
KLK5	AT1	5.47579e-09	0.306081	0.142	0.078	0.000101521	L-TB vs. AL-TB	Up-Up
KLK5	AT1	3.04099e-58	0.709446	0.142	0.002	5.638e-54	L-TB vs. Ctrl	Up-Up
KLRB1	AT1	3.39844e-21	0.606251	0.149	0.055	6.30071e-17	L-TB vs. Ctrl	Up-Up
KLRB1	AT1	4.61859e-12	0.350019	0.123	0.055	8.56286e-08	AL-TB vs. Ctrl	Up-Up
KLRD1	AT1	2.97807e-12	0.332124	0.124	0.058	5.52134e-08	L-TB vs. Ctrl	Up-Up
KNOP1	AT1	7.47801e-20	-0.296897	0.092	0.211	1.38642e-15	AL-TB vs. Ctrl	Down-Down
KNOP1	AT1	3.85966e-19	-0.270213	0.102	0.211	7.15581e-15	L-TB vs. Ctrl	Down-Down
KPNA3	AT1	3.3058e-13	-0.318096	0.287	0.416	6.12895e-09	AL-TB vs. Ctrl	Down-Down
KPNA3	AT1	2.71138e-11	-0.259265	0.299	0.416	5.02689e-07	L-TB vs. Ctrl	Down-Down
KRT10	AT1	3.91511e-10	0.329084	0.434	0.358	7.25861e-06	L-TB vs. Ctrl	Other
KRT18	AT1	7.16156e-20	-0.594206	0.834	0.875	1.32775e-15	L-TB vs. Ctrl	Down-Down
KRT18	AT1	8.62882e-31	-0.649494	0.834	0.874	1.59978e-26	L-TB vs. AL-TB	Down-Down
KRT19	AT1	3.25615e-13	-0.346434	0.86	0.901	6.0369e-09	AL-TB vs. Ctrl	Other
KRT19	AT1	5.26846e-38	-0.554702	0.828	0.901	9.76773e-34	L-TB vs. Ctrl	Other
KRT7	AT1	1.94854e-50	-0.930895	0.854	0.936	3.6126e-46	AL-TB vs. Ctrl	Down-Down
KRT7	AT1	7.58382e-118	-1.3716	0.804	0.936	1.40604e-113	L-TB vs. Ctrl	Down-Down
KRT7	AT1	1.21935e-15	-0.440701	0.804	0.854	2.26068e-11	L-TB vs. AL-TB	Down-Down
KRT8	AT1	1.57766e-09	0.329459	0.772	0.744	2.92498e-05	AL-TB vs. Ctrl	Other
KRT8	AT1	4.06003e-22	-0.551743	0.696	0.772	7.5273e-18	L-TB vs. AL-TB	Other
LACTB2	AT1	9.14414e-15	-0.304348	0.103	0.203	1.69532e-10	AL-TB vs. Ctrl	Down-Down
LAMA3	AT1	6.83335e-09	-0.309981	0.548	0.645	0.00012669	AL-TB vs. Ctrl	Down-Down
LAMB3	AT1	6.39948e-07	-0.367904	0.519	0.562	0.0118646	L-TB vs. AL-TB	Down-Down
LAMB3	AT1	9.03788e-09	-0.251923	0.519	0.595	0.000167562	L-TB vs. Ctrl	Down-Down
LAMC1	AT1	1.78817e-18	-0.324886	0.157	0.277	3.31527e-14	L-TB vs. Ctrl	Down-Down
LAMC2	AT1	8.83813e-22	1.01709	0.497	0.387	1.63859e-17	AL-TB vs. Ctrl	Other
LAMC2	AT1	4.77335e-20	-0.813165	0.364	0.497	8.84978e-16	L-TB vs. AL-TB	Other
LAMP1	AT1	8.37918e-16	-0.325157	0.508	0.622	1.5535e-11	L-TB vs. Ctrl	Down-Down
LAMP2	AT1	3.91085e-14	-0.295199	0.332	0.451	7.25071e-10	L-TB vs. Ctrl	Down-Down
LAP3	AT1	7.35748e-13	-0.334572	0.156	0.257	1.36408e-08	AL-TB vs. Ctrl	Other
LARP1	AT1	5.69848e-24	-0.45528	0.221	0.367	1.0565e-19	L-TB vs. Ctrl	Down-Down
LARP1	AT1	1.20173e-17	-0.40457	0.228	0.367	2.22801e-13	AL-TB vs. Ctrl	Down-Down
LARP4	AT1	1.41104e-23	-0.393018	0.202	0.352	2.61607e-19	L-TB vs. Ctrl	Down-Down
LARP4	AT1	8.34679e-22	-0.449917	0.201	0.352	1.54749e-17	AL-TB vs. Ctrl	Down-Down
LBH	AT1	5.38279e-66	1.05927	0.565	0.3	9.97969e-62	AL-TB vs. Ctrl	Up-Up
LBH	AT1	3.97153e-41	0.78564	0.499	0.3	7.36322e-37	L-TB vs. Ctrl	Up-Up
LBH	AT1	3.98681e-07	-0.27363	0.499	0.565	0.00739154	L-TB vs. AL-TB	Up-Up
LCK	AT1	2.14213e-17	0.276295	0.1	0.031	3.97151e-13	L-TB vs. Ctrl	Up-Up
LCN2	AT1	6.07499e-12	-0.513321	0.084	0.156	1.1263e-07	L-TB vs. Ctrl	Down-Down
LCN2	AT1	1.8905e-22	-0.623832	0.049	0.156	3.505e-18	AL-TB vs. Ctrl	Down-Down
LDLR	AT1	1.1864e-21	0.688242	0.631	0.518	2.19958e-17	AL-TB vs. Ctrl	Up-Up
LDLR	AT1	6.25405e-07	0.389011	0.576	0.518	0.011595	L-TB vs. Ctrl	Up-Up
LDLR	AT1	3.90282e-07	-0.299231	0.576	0.631	0.00723582	L-TB vs. AL-TB	Up-Up
LEPROT	AT1	5.90513e-19	-0.348193	0.525	0.647	1.09481e-14	L-TB vs. Ctrl	Down-Down
LEPROTL1	AT1	3.71744e-11	0.487806	0.351	0.278	6.89213e-07	L-TB vs. Ctrl	Up-Up
LGALS1	AT1	1.5221e-11	-0.603671	0.388	0.476	2.82198e-07	L-TB vs. Ctrl	Other
LIMCH1	AT1	6.34412e-22	-0.409712	0.751	0.825	1.1762e-17	AL-TB vs. Ctrl	Other
LIMCH1	AT1	8.65334e-30	-0.444013	0.734	0.825	1.60433e-25	L-TB vs. Ctrl	Other
LIMD2	AT1	1.83408e-29	0.466893	0.207	0.077	3.40038e-25	L-TB vs. Ctrl	Up-Up
LIMD2	AT1	1.19766e-14	0.35427	0.163	0.077	2.22046e-10	AL-TB vs. Ctrl	Up-Up
LIPH	AT1	3.99557e-23	-0.397837	0.297	0.464	7.40779e-19	L-TB vs. Ctrl	Down-Down
LIPH	AT1	1.16003e-14	-0.307901	0.322	0.464	2.15069e-10	AL-TB vs. Ctrl	Down-Down
LITAF	AT1	1.5167e-11	0.375965	0.416	0.329	2.81196e-07	L-TB vs. Ctrl	Other
LLGL2	AT1	8.67096e-10	-0.250492	0.483	0.599	1.6076e-05	AL-TB vs. Ctrl	Other
LLGL2	AT1	5.38004e-17	-0.306478	0.461	0.599	9.97459e-13	L-TB vs. Ctrl	Other
LMNA	AT1	3.83998e-59	0.899942	0.798	0.716	7.11932e-55	L-TB vs. Ctrl	Up-Up
LMNA	AT1	2.90282e-13	-0.383909	0.798	0.843	5.38182e-09	L-TB vs. AL-TB	Up-Up
LMNA	AT1	7.57589e-101	1.28385	0.843	0.716	1.40457e-96	AL-TB vs. Ctrl	Up-Up
LMO3	AT1	1.92585e-76	-1.22996	0.338	0.622	3.57053e-72	AL-TB vs. Ctrl	Down-Down
LMO3	AT1	1.62677e-74	-1.14816	0.371	0.622	3.01603e-70	L-TB vs. Ctrl	Down-Down
LMTK2	AT1	6.65675e-14	-0.278014	0.207	0.32	1.23416e-09	L-TB vs. Ctrl	Down-Down
LNPEP	AT1	1.00707e-18	-0.369992	0.262	0.4	1.86711e-14	L-TB vs. Ctrl	Down-Down
LNPEP	AT1	8.95592e-15	-0.309689	0.267	0.4	1.66043e-10	AL-TB vs. Ctrl	Down-Down
LNX2	AT1	1.70415e-28	-0.480458	0.191	0.37	3.1595e-24	AL-TB vs. Ctrl	Down-Down
LNX2	AT1	4.95358e-22	-0.377227	0.223	0.37	9.18393e-18	L-TB vs. Ctrl	Down-Down
LPCAT1	AT1	3.26766e-53	-1.04455	0.428	0.641	6.05825e-49	AL-TB vs. Ctrl	Down-Down
LPCAT1	AT1	1.76442e-53	-0.962435	0.443	0.641	3.27123e-49	L-TB vs. Ctrl	Down-Down
LPP	AT1	1.04029e-31	-0.539489	0.407	0.575	1.9287e-27	L-TB vs. Ctrl	Down-Down
LPP	AT1	2.69682e-18	-0.372404	0.435	0.575	4.99991e-14	AL-TB vs. Ctrl	Down-Down
LRIG2	AT1	8.94341e-14	-0.27152	0.081	0.171	1.65811e-09	AL-TB vs. Ctrl	Other
LRP10	AT1	1.23188e-14	-0.285044	0.311	0.434	2.2839e-10	L-TB vs. Ctrl	Down-Down
LRP6	AT1	1.72841e-17	-0.386546	0.188	0.324	3.20448e-13	AL-TB vs. Ctrl	Down-Down
LRP6	AT1	8.41397e-28	-0.440174	0.164	0.324	1.55995e-23	L-TB vs. Ctrl	Down-Down
LRPPRC	AT1	6.19822e-14	-0.293689	0.185	0.302	1.14915e-09	AL-TB vs. Ctrl	Down-Down
LRPPRC	AT1	1.21549e-21	-0.358022	0.168	0.302	2.25351e-17	L-TB vs. Ctrl	Down-Down
LRRC16A	AT1	9.60101e-16	-0.338649	0.217	0.352	1.78003e-11	AL-TB vs. Ctrl	Other
LRRC58	AT1	9.81187e-13	-0.257751	0.177	0.277	1.81912e-08	L-TB vs. Ctrl	Down-Down
LRRN4	AT1	3.20367e-13	-0.303327	0.097	0.189	5.93961e-09	AL-TB vs. Ctrl	Down-Down
LRRN4	AT1	1.56133e-15	-0.313521	0.096	0.189	2.89471e-11	L-TB vs. Ctrl	Down-Down
LSP1	AT1	5.03587e-10	0.255129	0.177	0.108	9.3365e-06	L-TB vs. Ctrl	Up-Up
LSS	AT1	6.64666e-18	-0.309212	0.089	0.186	1.23229e-13	L-TB vs. Ctrl	Down-Down
LSS	AT1	1.16603e-12	-0.30327	0.098	0.186	2.16183e-08	AL-TB vs. Ctrl	Down-Down
LTA4H	AT1	7.21796e-08	-0.259292	0.255	0.332	0.00133821	L-TB vs. Ctrl	Other
LTB	AT1	2.25157e-32	0.684316	0.148	0.035	4.1744e-28	L-TB vs. Ctrl	Up-Up
LTB	AT1	1.82851e-23	0.628226	0.128	0.035	3.39006e-19	AL-TB vs. Ctrl	Up-Up
LTBP4	AT1	6.02173e-08	0.317508	0.331	0.26	0.00111643	AL-TB vs. Ctrl	Other
LTBP4	AT1	5.95851e-10	0.336458	0.34	0.26	1.10471e-05	L-TB vs. Ctrl	Other
LTBR	AT1	1.30061e-11	-0.297292	0.306	0.424	2.41133e-07	AL-TB vs. Ctrl	Down-Down
LTBR	AT1	1.83346e-29	-0.498992	0.251	0.424	3.39923e-25	L-TB vs. Ctrl	Down-Down
LTN1	AT1	1.37077e-12	-0.254448	0.177	0.279	2.5414e-08	L-TB vs. Ctrl	Down-Down
LUC7L3	AT1	9.2335e-18	-0.467951	0.483	0.612	1.71189e-13	AL-TB vs. Ctrl	Other
LUC7L3	AT1	3.3323e-09	-0.260888	0.524	0.612	6.17808e-05	L-TB vs. Ctrl	Other
LY6E	AT1	3.57616e-32	0.674821	0.694	0.579	6.6302e-28	AL-TB vs. Ctrl	Up-Up
LY6E	AT1	1.58263e-28	0.566013	0.687	0.579	2.93419e-24	L-TB vs. Ctrl	Up-Up
LYN	AT1	4.7555e-18	-0.433233	0.172	0.3	8.8167e-14	AL-TB vs. Ctrl	Down-Down
LYN	AT1	5.6161e-20	-0.430428	0.175	0.3	1.04123e-15	L-TB vs. Ctrl	Down-Down
LYZ	AT1	5.31849e-15	0.390414	0.422	0.295	9.86048e-11	AL-TB vs. Ctrl	Up-Up
MACC1	AT1	1.41648e-13	-0.498336	0.156	0.252	2.62616e-09	L-TB vs. AL-TB	Other
MACC1	AT1	2.72822e-09	-0.281626	0.156	0.234	5.05812e-05	L-TB vs. Ctrl	Other
MACF1	AT1	1.27191e-75	-0.983615	0.469	0.696	2.35812e-71	L-TB vs. Ctrl	Down-Down
MACF1	AT1	1.32032e-46	-0.797294	0.501	0.696	2.44788e-42	AL-TB vs. Ctrl	Down-Down
MAFB	AT1	7.41026e-07	0.420093	0.221	0.158	0.0137386	AL-TB vs. Ctrl	Up-Up
MAFF	AT1	2.44023e-51	0.972619	0.388	0.171	4.52419e-47	AL-TB vs. Ctrl	Up-Up
MAFF	AT1	9.34579e-42	0.761223	0.354	0.171	1.73271e-37	L-TB vs. Ctrl	Up-Up
MAFK	AT1	4.53965e-10	0.376613	0.294	0.208	8.4165e-06	AL-TB vs. Ctrl	Other
MAL2	AT1	2.95766e-29	-0.480425	0.465	0.628	5.4835e-25	L-TB vs. Ctrl	Down-Down
MALL	AT1	4.8047e-29	-0.630814	0.194	0.346	8.90791e-25	L-TB vs. Ctrl	Down-Down
MALL	AT1	1.23632e-12	-0.404484	0.239	0.346	2.29214e-08	AL-TB vs. Ctrl	Down-Down
MAN2A2	AT1	1.24237e-11	-0.28615	0.092	0.175	2.30335e-07	AL-TB vs. Ctrl	Down-Down
MAP2	AT1	7.08826e-16	-0.379941	0.328	0.455	1.31416e-11	L-TB vs. Ctrl	Down-Down
MAP2	AT1	8.7449e-19	-0.466928	0.311	0.455	1.6213e-14	AL-TB vs. Ctrl	Down-Down
MAP2K3	AT1	1.43192e-14	-0.500577	0.247	0.356	2.65477e-10	L-TB vs. AL-TB	Other
MAP4	AT1	1.18592e-14	-0.342971	0.348	0.482	2.19869e-10	AL-TB vs. Ctrl	Down-Down
MAP4	AT1	2.39028e-28	-0.487015	0.309	0.482	4.43158e-24	L-TB vs. Ctrl	Down-Down
MAP4K3	AT1	2.23958e-12	-0.260089	0.096	0.176	4.15219e-08	L-TB vs. Ctrl	Down-Down
MAPK1	AT1	3.41054e-19	-0.340199	0.266	0.423	6.32314e-15	AL-TB vs. Ctrl	Down-Down
MAPK1	AT1	2.27353e-16	-0.311831	0.292	0.423	4.21512e-12	L-TB vs. Ctrl	Down-Down
MARCHF2	AT1	5.43574e-15	-0.284743	0.183	0.298	1.00779e-10	L-TB vs. Ctrl	Down-Down
MARCKSL1	AT1	1.13218e-34	0.454442	0.18	0.05	2.09905e-30	L-TB vs. Ctrl	Up-Up
MARCKSL1	AT1	5.10317e-36	0.606538	0.188	0.05	9.46128e-32	AL-TB vs. Ctrl	Up-Up
MARK3	AT1	8.92617e-11	-0.275461	0.323	0.431	1.65491e-06	L-TB vs. Ctrl	Down-Down
MARS	AT1	1.00884e-21	-0.305408	0.074	0.179	1.87038e-17	L-TB vs. Ctrl	Down-Down
MARVELD1	AT1	1.25848e-16	-0.268819	0.107	0.217	2.33322e-12	AL-TB vs. Ctrl	Down-Down
MARVELD1	AT1	1.40919e-21	-0.268039	0.101	0.217	2.61264e-17	L-TB vs. Ctrl	Down-Down
MBTPS1	AT1	1.42068e-12	-0.283148	0.298	0.417	2.63395e-08	AL-TB vs. Ctrl	Other
MBTPS1	AT1	1.18598e-11	-0.27532	0.309	0.417	2.19881e-07	L-TB vs. Ctrl	Other
MCL1	AT1	3.19606e-58	0.762985	0.756	0.642	5.92549e-54	L-TB vs. Ctrl	Up-Up
MCL1	AT1	4.88636e-54	0.778637	0.765	0.642	9.05931e-50	AL-TB vs. Ctrl	Up-Up
MCM3AP	AT1	1.63541e-16	-0.274294	0.098	0.195	3.03204e-12	L-TB vs. Ctrl	Down-Down
MDK	AT1	7.25991e-17	0.606196	0.126	0.047	1.34599e-12	AL-TB vs. Ctrl	Up-Up
MDM2	AT1	1.46075e-22	-0.4096	0.165	0.302	2.70822e-18	L-TB vs. Ctrl	Down-Down
MDN1	AT1	1.50132e-10	-0.260075	0.095	0.174	2.78345e-06	AL-TB vs. Ctrl	Down-Down
MECOM	AT1	1.81145e-09	-0.254804	0.206	0.291	3.35842e-05	L-TB vs. Ctrl	Down-Down
MECOM	AT1	1.53676e-09	-0.261489	0.196	0.291	2.84915e-05	AL-TB vs. Ctrl	Down-Down
MEGF9	AT1	9.51133e-89	-1.29061	0.26	0.554	1.7634e-84	L-TB vs. Ctrl	Down-Down
MEGF9	AT1	5.66549e-78	-1.34362	0.26	0.554	1.05038e-73	AL-TB vs. Ctrl	Down-Down
MFHAS1	AT1	4.12216e-07	0.335366	0.314	0.252	0.00764248	AL-TB vs. Ctrl	Down-Down
MFHAS1	AT1	2.55387e-13	-0.361716	0.204	0.314	4.73487e-09	L-TB vs. AL-TB	Down-Down
MFN1	AT1	7.13408e-13	-0.263104	0.142	0.242	1.32266e-08	AL-TB vs. Ctrl	Down-Down
MFN1	AT1	1.08664e-21	-0.337124	0.121	0.242	2.01463e-17	L-TB vs. Ctrl	Down-Down
MFSD1	AT1	1.03944e-15	-0.284893	0.146	0.262	1.92713e-11	AL-TB vs. Ctrl	Down-Down
MFSD2A	AT1	2.17859e-29	-0.370225	0.024	0.119	4.0391e-25	L-TB vs. Ctrl	Down-Down
MFSD2A	AT1	4.22391e-17	-0.310745	0.038	0.119	7.83113e-13	AL-TB vs. Ctrl	Down-Down
MFSD6	AT1	1.83228e-12	-0.256308	0.182	0.293	3.39706e-08	AL-TB vs. Ctrl	Down-Down
MFSD6	AT1	4.00321e-21	-0.302049	0.159	0.293	7.42196e-17	L-TB vs. Ctrl	Down-Down
MGEA5	AT1	1.34642e-11	-0.341067	0.412	0.526	2.49627e-07	AL-TB vs. Ctrl	Other
MGLL	AT1	3.95027e-39	-0.580832	0.583	0.742	7.3238e-35	L-TB vs. Ctrl	Down-Down
MGLL	AT1	1.27873e-24	-0.448919	0.593	0.742	2.37076e-20	AL-TB vs. Ctrl	Down-Down
MGST1	AT1	3.69605e-09	-0.623391	0.369	0.442	6.85248e-05	AL-TB vs. Ctrl	Other
MGST1	AT1	1.27995e-06	0.295117	0.454	0.369	0.0237302	L-TB vs. AL-TB	Other
MGST3	AT1	4.69961e-12	-0.326167	0.498	0.59	8.71309e-08	L-TB vs. Ctrl	Other
MICAL2	AT1	2.24468e-45	-0.605115	0.205	0.416	4.16163e-41	L-TB vs. Ctrl	Down-Down
MICAL2	AT1	6.94335e-22	-0.442593	0.257	0.416	1.2873e-17	AL-TB vs. Ctrl	Down-Down
MICU1	AT1	1.83659e-14	-0.333262	0.195	0.317	3.40504e-10	AL-TB vs. Ctrl	Other
MICU1	AT1	2.35353e-10	-0.316304	0.225	0.317	4.36345e-06	L-TB vs. Ctrl	Other
MIDN	AT1	7.87301e-26	0.731011	0.54	0.418	1.45966e-21	AL-TB vs. Ctrl	Other
MIDN	AT1	3.94721e-07	-0.330785	0.476	0.54	0.00731812	L-TB vs. AL-TB	Other
MIDN	AT1	1.73976e-09	0.400226	0.476	0.418	3.22551e-05	L-TB vs. Ctrl	Other
MKLN1	AT1	2.37487e-11	-0.288753	0.245	0.359	4.40301e-07	AL-TB vs. Ctrl	Down-Down
MKLN1	AT1	2.96302e-15	-0.332491	0.24	0.359	5.49345e-11	L-TB vs. Ctrl	Down-Down
MLEC	AT1	7.4185e-12	-0.27593	0.281	0.386	1.37539e-07	L-TB vs. Ctrl	Down-Down
MLF1	AT1	1.34601e-17	0.432222	0.206	0.103	2.4955e-13	AL-TB vs. Ctrl	Up-Up
MLF1	AT1	3.70931e-10	0.319396	0.171	0.103	6.87706e-06	L-TB vs. Ctrl	Up-Up
MLLT4	AT1	2.82152e-13	-0.277761	0.617	0.721	5.2311e-09	L-TB vs. Ctrl	Down-Down
MLLT4	AT1	5.97166e-11	-0.273567	0.631	0.721	1.10715e-06	AL-TB vs. Ctrl	Down-Down
MLPH	AT1	7.00658e-13	-0.264336	0.116	0.212	1.29902e-08	AL-TB vs. Ctrl	Down-Down
MLX	AT1	2.09232e-20	-0.347793	0.177	0.323	3.87916e-16	AL-TB vs. Ctrl	Down-Down
MLX	AT1	4.2575e-25	-0.366306	0.172	0.323	7.89341e-21	L-TB vs. Ctrl	Down-Down
MMP7	AT1	1.71587e-10	1.69861	0.112	0.054	3.18123e-06	AL-TB vs. Ctrl	Other
MMP7	AT1	8.61537e-14	-1.62991	0.046	0.112	1.59729e-09	L-TB vs. AL-TB	Other
MOB1B	AT1	9.45469e-14	-0.252899	0.106	0.195	1.7529e-09	L-TB vs. Ctrl	Down-Down
MPC1	AT1	8.28165e-10	-0.257142	0.285	0.386	1.53542e-05	L-TB vs. Ctrl	Down-Down
MPPE1	AT1	2.50514e-16	-0.295815	0.192	0.314	4.64454e-12	L-TB vs. Ctrl	Down-Down
MPPE1	AT1	5.69447e-12	-0.291713	0.204	0.314	1.05575e-07	AL-TB vs. Ctrl	Down-Down
MPRIP	AT1	1.8701e-24	-0.474033	0.307	0.471	3.46716e-20	L-TB vs. Ctrl	Down-Down
MPST	AT1	1.19404e-09	-0.257404	0.226	0.325	2.21374e-05	AL-TB vs. Ctrl	Down-Down
MPZL1	AT1	3.53614e-25	-0.430154	0.233	0.393	6.556e-21	L-TB vs. Ctrl	Down-Down
MPZL1	AT1	8.26078e-10	-0.262429	0.285	0.393	1.53155e-05	AL-TB vs. Ctrl	Down-Down
MPZL2	AT1	8.21405e-28	-0.707919	0.301	0.459	1.52288e-23	L-TB vs. Ctrl	Down-Down
MPZL2	AT1	5.69726e-17	-0.590075	0.329	0.459	1.05627e-12	AL-TB vs. Ctrl	Down-Down
MRAS	AT1	1.26737e-19	-0.358219	0.095	0.214	2.34971e-15	AL-TB vs. Ctrl	Down-Down
MRAS	AT1	3.20726e-27	-0.376261	0.085	0.214	5.94627e-23	L-TB vs. Ctrl	Down-Down
MROH1	AT1	8.02191e-23	-0.354387	0.148	0.284	1.48726e-18	L-TB vs. Ctrl	Down-Down
MROH1	AT1	2.5818e-24	-0.35862	0.131	0.284	4.78666e-20	AL-TB vs. Ctrl	Down-Down
MRPL14	AT1	5.63248e-26	-0.42195	0.631	0.736	1.04426e-21	L-TB vs. Ctrl	Down-Down
MRPL14	AT1	1.72416e-18	-0.353776	0.626	0.736	3.19659e-14	AL-TB vs. Ctrl	Down-Down
MRPL33	AT1	3.56489e-16	-0.394566	0.422	0.55	6.60931e-12	AL-TB vs. Ctrl	Down-Down
MRPL33	AT1	4.60473e-09	-0.265718	0.464	0.55	8.53717e-05	L-TB vs. Ctrl	Down-Down
MRPS25	AT1	2.05816e-16	-0.33048	0.19	0.304	3.81583e-12	L-TB vs. Ctrl	Down-Down
MRPS25	AT1	1.76992e-18	-0.353027	0.169	0.304	3.28142e-14	AL-TB vs. Ctrl	Down-Down
MSLN	AT1	1.46725e-41	-0.568431	0.452	0.69	2.72027e-37	AL-TB vs. Ctrl	Down-Down
MSLN	AT1	4.15204e-91	-0.921736	0.372	0.69	7.69787e-87	L-TB vs. Ctrl	Down-Down
MSLN	AT1	8.9524e-08	-0.353305	0.372	0.452	0.00165977	L-TB vs. AL-TB	Down-Down
MSMO1	AT1	8.33467e-30	-0.74136	0.219	0.392	1.54525e-25	AL-TB vs. Ctrl	Down-Down
MSMO1	AT1	1.07176e-50	-0.907589	0.184	0.392	1.98704e-46	L-TB vs. Ctrl	Down-Down
MSN	AT1	8.75483e-10	-0.271182	0.576	0.651	1.62314e-05	L-TB vs. Ctrl	Down-Down
MSR1	AT1	3.85774e-12	-0.309122	0.046	0.106	7.15225e-08	L-TB vs. Ctrl	Other
MSRB3	AT1	1.11402e-12	-0.261011	0.07	0.142	2.0654e-08	L-TB vs. Ctrl	Down-Down
MSRB3	AT1	8.63518e-11	-0.285239	0.07	0.142	1.60096e-06	AL-TB vs. Ctrl	Down-Down
MT-ATP8	AT1	2.89296e-38	-0.68184	0.309	0.505	5.36355e-34	L-TB vs. Ctrl	Down-Down
MT-ATP8	AT1	8.10979e-36	-0.695304	0.298	0.505	1.50355e-31	AL-TB vs. Ctrl	Down-Down
MT-CO2	AT1	2.84228e-15	-0.286033	0.956	0.974	5.26959e-11	L-TB vs. Ctrl	Down-Down
MT-CO2	AT1	4.19304e-16	-0.312261	0.952	0.974	7.7739e-12	AL-TB vs. Ctrl	Down-Down
MT-CYB	AT1	5.96437e-14	0.337946	0.951	0.954	1.1058e-09	AL-TB vs. Ctrl	Other
MT-CYB	AT1	2.29394e-17	0.346445	0.955	0.954	4.25297e-13	L-TB vs. Ctrl	Other
MT-ND1	AT1	7.18207e-27	-0.439632	0.908	0.934	1.33156e-22	L-TB vs. Ctrl	Down-Down
MT-ND1	AT1	9.80178e-19	-0.410466	0.919	0.934	1.81725e-14	AL-TB vs. Ctrl	Down-Down
MT-ND2	AT1	5.06909e-38	-0.513833	0.924	0.948	9.39809e-34	AL-TB vs. Ctrl	Down-Down
MT-ND2	AT1	1.95167e-37	-0.460796	0.923	0.948	3.6184e-33	L-TB vs. Ctrl	Down-Down
MT-ND3	AT1	1.38568e-25	-0.384764	0.936	0.96	2.56906e-21	AL-TB vs. Ctrl	Other
MT-ND3	AT1	2.199e-11	0.288074	0.942	0.936	4.07696e-07	L-TB vs. AL-TB	Other
MT-ND4	AT1	3.60076e-21	-0.366783	0.956	0.97	6.6758e-17	AL-TB vs. Ctrl	Down-Down
MT-ND4	AT1	4.44666e-40	-0.470901	0.952	0.97	8.24411e-36	L-TB vs. Ctrl	Down-Down
MT-ND4L	AT1	3.16756e-46	-0.716492	0.476	0.696	5.87266e-42	AL-TB vs. Ctrl	Down-Down
MT-ND4L	AT1	3.82575e-64	-0.82619	0.477	0.696	7.09293e-60	L-TB vs. Ctrl	Down-Down
MT-ND5	AT1	1.24139e-47	-0.615001	0.797	0.883	2.30154e-43	AL-TB vs. Ctrl	Down-Down
MT-ND5	AT1	5.53363e-59	-0.636427	0.801	0.883	1.02594e-54	L-TB vs. Ctrl	Down-Down
MT-ND6	AT1	8.90856e-44	-0.719884	0.126	0.33	1.65165e-39	AL-TB vs. Ctrl	Down-Down
MT-ND6	AT1	1.09843e-40	-0.639248	0.15	0.33	2.03649e-36	L-TB vs. Ctrl	Down-Down
MT1E	AT1	9.97569e-134	2.03792	0.737	0.385	1.84949e-129	AL-TB vs. Ctrl	Up-Up
MT1E	AT1	6.86926e-130	1.35838	0.721	0.385	1.27356e-125	L-TB vs. Ctrl	Up-Up
MT1F	AT1	2.45766e-55	0.842137	0.222	0.046	4.5565e-51	L-TB vs. Ctrl	Up-Up
MT1F	AT1	4.05211e-54	1.10548	0.226	0.046	7.51262e-50	AL-TB vs. Ctrl	Up-Up
MT1G	AT1	6.57228e-108	2.04792	0.344	0.044	1.2185e-103	AL-TB vs. Ctrl	Up-Up
MT1G	AT1	1.88891e-93	1.03941	0.307	0.044	3.50204e-89	L-TB vs. Ctrl	Up-Up
MT1M	AT1	1.43977e-14	0.76091	0.121	0.048	2.66933e-10	AL-TB vs. Ctrl	Other
MT1M	AT1	2.70814e-16	0.286092	0.124	0.048	5.0209e-12	L-TB vs. Ctrl	Other
MT1X	AT1	6.64045e-172	2.63152	0.642	0.194	1.23114e-167	AL-TB vs. Ctrl	Up-Up
MT1X	AT1	1.9728e-181	2.07767	0.634	0.194	3.65758e-177	L-TB vs. Ctrl	Up-Up
MT2A	AT1	1.07298e-150	2.0823	0.857	0.593	1.9893e-146	AL-TB vs. Ctrl	Up-Up
MT2A	AT1	1.23002e-166	1.64671	0.85	0.593	2.28046e-162	L-TB vs. Ctrl	Up-Up
MTMR12	AT1	2.64109e-16	-0.269135	0.098	0.194	4.89657e-12	L-TB vs. Ctrl	Down-Down
MTMR6	AT1	1.34281e-17	-0.279109	0.121	0.228	2.48956e-13	L-TB vs. Ctrl	Down-Down
MTMR6	AT1	5.07461e-17	-0.286961	0.113	0.228	9.40832e-13	AL-TB vs. Ctrl	Down-Down
MTR	AT1	2.53834e-12	-0.266649	0.138	0.236	4.70609e-08	AL-TB vs. Ctrl	Down-Down
MTUS1	AT1	2.74388e-23	-0.432741	0.211	0.355	5.08715e-19	L-TB vs. Ctrl	Down-Down
MTUS1	AT1	3.49279e-19	-0.39255	0.211	0.355	6.47563e-15	AL-TB vs. Ctrl	Down-Down
MUC1	AT1	6.71197e-19	-1.12022	0.387	0.478	1.2444e-14	AL-TB vs. Ctrl	Down-Down
MUC1	AT1	8.75133e-27	-1.22072	0.37	0.478	1.6225e-22	L-TB vs. Ctrl	Down-Down
MVD	AT1	6.92082e-17	-0.28057	0.081	0.171	1.28312e-12	L-TB vs. Ctrl	Down-Down
MVP	AT1	1.10437e-14	-0.384132	0.284	0.412	2.04751e-10	AL-TB vs. Ctrl	Down-Down
MVP	AT1	1.87918e-28	-0.509112	0.245	0.412	3.48399e-24	L-TB vs. Ctrl	Down-Down
MX2	AT1	7.28287e-07	0.384934	0.113	0.065	0.0135024	AL-TB vs. Ctrl	Other
MYADM	AT1	1.5946e-82	1.12382	0.686	0.478	2.95639e-78	L-TB vs. Ctrl	Up-Up
MYADM	AT1	2.00641e-100	1.50611	0.71	0.478	3.71989e-96	AL-TB vs. Ctrl	Up-Up
MYADM	AT1	3.88919e-07	-0.38229	0.686	0.71	0.00721056	L-TB vs. AL-TB	Up-Up
MYEF2	AT1	8.75668e-28	-0.450935	0.109	0.248	1.62349e-23	L-TB vs. Ctrl	Down-Down
MYEF2	AT1	2.71715e-21	-0.433357	0.117	0.248	5.03761e-17	AL-TB vs. Ctrl	Down-Down
MYH14	AT1	5.93969e-13	-0.256748	0.341	0.461	1.10122e-08	L-TB vs. Ctrl	Down-Down
MYH9	AT1	7.69918e-15	-0.354026	0.538	0.64	1.42743e-10	L-TB vs. Ctrl	Other
MYLIP	AT1	1.3556e-08	0.296215	0.219	0.152	0.000251328	L-TB vs. Ctrl	Other
MYO1B	AT1	2.37243e-24	-0.414547	0.619	0.754	4.39849e-20	AL-TB vs. Ctrl	Down-Down
MYO1B	AT1	2.60663e-41	-0.553293	0.58	0.754	4.83269e-37	L-TB vs. Ctrl	Down-Down
MYO1D	AT1	1.94838e-19	-0.315508	0.196	0.331	3.6123e-15	L-TB vs. Ctrl	Down-Down
MYO1D	AT1	4.39981e-14	-0.260672	0.206	0.331	8.15725e-10	AL-TB vs. Ctrl	Down-Down
MYO5C	AT1	1.51347e-24	-0.428472	0.288	0.464	2.80597e-20	AL-TB vs. Ctrl	Down-Down
MYO5C	AT1	1.9298e-31	-0.453459	0.278	0.464	3.57786e-27	L-TB vs. Ctrl	Down-Down
MYO6	AT1	2.58905e-43	-0.705971	0.406	0.62	4.8001e-39	AL-TB vs. Ctrl	Down-Down
MYO6	AT1	4.86483e-60	-0.780939	0.382	0.62	9.0194e-56	L-TB vs. Ctrl	Down-Down
MYO9A	AT1	3.41062e-14	-0.328687	0.392	0.52	6.32328e-10	L-TB vs. Ctrl	Down-Down
MYOF	AT1	1.13417e-14	-0.311281	0.301	0.437	2.10276e-10	AL-TB vs. Ctrl	Down-Down
MYOF	AT1	1.26018e-40	-0.60033	0.237	0.437	2.33637e-36	L-TB vs. Ctrl	Down-Down
MYRF	AT1	1.04281e-09	-0.272571	0.369	0.474	1.93338e-05	AL-TB vs. Ctrl	Other
N4BP2L2	AT1	5.70861e-09	-0.25639	0.665	0.731	0.000105838	AL-TB vs. Ctrl	Down-Down
NAB2	AT1	3.00923e-12	0.371547	0.178	0.097	5.57911e-08	AL-TB vs. Ctrl	Other
NAB2	AT1	4.22214e-17	-0.317994	0.081	0.178	7.82785e-13	L-TB vs. AL-TB	Other
NACA	AT1	8.26287e-13	0.355601	0.745	0.721	1.53194e-08	AL-TB vs. Ctrl	Up-Up
NACA	AT1	3.97923e-28	0.520877	0.776	0.721	7.37749e-24	L-TB vs. Ctrl	Up-Up
NAGLU	AT1	3.17401e-21	-0.283179	0.074	0.179	5.88461e-17	L-TB vs. Ctrl	Other
NAMPT	AT1	2.0211e-19	-0.826026	0.427	0.535	3.74711e-15	L-TB vs. Ctrl	Down-Down
NAMPT	AT1	1.16461e-28	-1.01181	0.376	0.535	2.15919e-24	AL-TB vs. Ctrl	Down-Down
NAP1L1	AT1	1.83727e-09	-0.29652	0.514	0.606	3.40631e-05	AL-TB vs. Ctrl	Other
NAPSA	AT1	5.23263e-75	-1.55597	0.445	0.66	9.70129e-71	L-TB vs. Ctrl	Down-Down
NAPSA	AT1	3.34691e-68	-1.61461	0.434	0.66	6.20517e-64	AL-TB vs. Ctrl	Down-Down
NARS	AT1	6.91745e-18	-0.302284	0.209	0.352	1.2825e-13	AL-TB vs. Ctrl	Other
NARS	AT1	1.57209e-15	-0.296436	0.231	0.352	2.91465e-11	L-TB vs. Ctrl	Other
NBEAL1	AT1	4.15661e-16	-0.391784	0.378	0.504	7.70635e-12	L-TB vs. Ctrl	Down-Down
NBEAL2	AT1	1.55915e-22	-0.579003	0.334	0.495	2.89066e-18	AL-TB vs. Ctrl	Down-Down
NBEAL2	AT1	5.53899e-23	-0.561407	0.342	0.495	1.02693e-18	L-TB vs. Ctrl	Down-Down
NBN	AT1	2.69964e-13	-0.288182	0.192	0.306	5.00513e-09	AL-TB vs. Ctrl	Down-Down
NBPF12	AT1	5.72809e-24	-1.06373	0.106	0.221	1.06199e-19	L-TB vs. Ctrl	Down-Down
NBPF12	AT1	1.23171e-25	-1.07922	0.09	0.221	2.28359e-21	AL-TB vs. Ctrl	Down-Down
NCEH1	AT1	3.16693e-11	-0.358738	0.123	0.206	5.87149e-07	L-TB vs. AL-TB	Down-Down
NCKAP1	AT1	4.54787e-23	-0.356658	0.299	0.452	8.43175e-19	L-TB vs. Ctrl	Down-Down
NCKAP1	AT1	6.1642e-13	-0.292322	0.325	0.452	1.14284e-08	AL-TB vs. Ctrl	Down-Down
NCL	AT1	5.59466e-10	-0.314852	0.528	0.626	1.03725e-05	AL-TB vs. Ctrl	Other
NCL	AT1	3.72227e-07	0.252145	0.591	0.528	0.0069011	L-TB vs. AL-TB	Other
NCOA4	AT1	7.81807e-17	-0.329147	0.242	0.369	1.44947e-12	L-TB vs. Ctrl	Down-Down
NCOA4	AT1	4.22996e-17	-0.376421	0.233	0.369	7.84234e-13	AL-TB vs. Ctrl	Down-Down
NCOR2	AT1	1.03768e-10	-0.266611	0.408	0.526	1.92385e-06	AL-TB vs. Ctrl	Down-Down
NCOR2	AT1	6.21333e-12	-0.295694	0.415	0.526	1.15195e-07	L-TB vs. Ctrl	Down-Down
NDFIP2	AT1	8.90064e-10	-0.261965	0.228	0.32	1.65018e-05	L-TB vs. Ctrl	Down-Down
NDUFA4	AT1	1.35531e-10	-0.285925	0.686	0.75	2.51274e-06	AL-TB vs. Ctrl	Other
NDUFS1	AT1	5.89312e-16	-0.35399	0.178	0.299	1.09258e-11	AL-TB vs. Ctrl	Down-Down
NDUFS1	AT1	2.09354e-18	-0.307109	0.175	0.299	3.88141e-14	L-TB vs. Ctrl	Down-Down
NDUFS8	AT1	3.47921e-16	-0.306641	0.304	0.43	6.45046e-12	L-TB vs. Ctrl	Down-Down
NEU1	AT1	2.36508e-06	0.350959	0.268	0.213	0.0438485	L-TB vs. Ctrl	Up-Up
NEXN	AT1	6.27856e-14	-0.457014	0.218	0.334	1.16404e-09	AL-TB vs. Ctrl	Down-Down
NEXN	AT1	1.01926e-29	-0.521015	0.169	0.334	1.88971e-25	L-TB vs. Ctrl	Down-Down
NF1	AT1	1.57371e-15	-0.305521	0.208	0.325	2.91766e-11	L-TB vs. Ctrl	Down-Down
NFE2L1	AT1	5.00003e-20	-0.337378	0.21	0.348	9.27006e-16	L-TB vs. Ctrl	Down-Down
NFE2L1	AT1	5.09895e-13	-0.26145	0.226	0.348	9.45346e-09	AL-TB vs. Ctrl	Down-Down
NFKBIA	AT1	9.85861e-29	0.508161	0.851	0.808	1.82779e-24	L-TB vs. Ctrl	Up-Up
NFKBIA	AT1	1.27638e-23	0.677944	0.841	0.808	2.36642e-19	AL-TB vs. Ctrl	Up-Up
NFX1	AT1	3.59664e-14	-0.314492	0.156	0.257	6.66816e-10	L-TB vs. Ctrl	Down-Down
NHLRC2	AT1	4.50201e-19	-0.292252	0.123	0.251	8.34673e-15	AL-TB vs. Ctrl	Down-Down
NHLRC2	AT1	7.8328e-16	-0.292164	0.143	0.251	1.4522e-11	L-TB vs. Ctrl	Down-Down
NHLRC3	AT1	9.65079e-15	-0.300843	0.142	0.256	1.78926e-10	AL-TB vs. Ctrl	Down-Down
NHLRC3	AT1	1.42816e-17	-0.298607	0.141	0.256	2.64782e-13	L-TB vs. Ctrl	Down-Down
NKG7	AT1	2.61123e-42	0.930853	0.322	0.136	4.84121e-38	L-TB vs. Ctrl	Up-Up
NKG7	AT1	2.18498e-21	0.957205	0.264	0.136	4.05095e-17	AL-TB vs. Ctrl	Up-Up
NKTR	AT1	2.43982e-09	-0.317068	0.504	0.584	4.52342e-05	L-TB vs. Ctrl	Down-Down
NKTR	AT1	2.46294e-11	-0.347286	0.479	0.584	4.56629e-07	AL-TB vs. Ctrl	Down-Down
NMT1	AT1	1.73143e-09	-0.252363	0.255	0.349	3.21008e-05	L-TB vs. Ctrl	Down-Down
NMT1	AT1	2.28011e-12	-0.278041	0.234	0.349	4.22732e-08	AL-TB vs. Ctrl	Down-Down
NOL7	AT1	1.88518e-08	-0.284105	0.264	0.353	0.000349513	AL-TB vs. Ctrl	Down-Down
NOTCH2	AT1	1.84287e-18	-0.320032	0.183	0.308	3.41668e-14	L-TB vs. Ctrl	Down-Down
NPC2	AT1	1.22228e-07	0.468697	0.36	0.292	0.00226611	AL-TB vs. Ctrl	Down-Down
NPEPPS	AT1	2.08973e-13	-0.282643	0.351	0.476	3.87436e-09	L-TB vs. Ctrl	Down-Down
NPLOC4	AT1	3.54519e-12	-0.252721	0.16	0.255	6.57278e-08	L-TB vs. Ctrl	Other
NPM1	AT1	1.10842e-07	0.261481	0.658	0.632	0.00205502	L-TB vs. Ctrl	Up-Up
NPNT	AT1	1.57717e-19	-0.499698	0.485	0.614	2.92407e-15	AL-TB vs. Ctrl	Down-Down
NPNT	AT1	1.9497e-28	-0.546313	0.456	0.614	3.61474e-24	L-TB vs. Ctrl	Down-Down
NR1D1	AT1	1.09899e-25	-0.254603	0.029	0.119	2.03752e-21	L-TB vs. Ctrl	Down-Down
NR1D1	AT1	1.01715e-25	-0.267241	0.021	0.119	1.8858e-21	AL-TB vs. Ctrl	Down-Down
NR1D2	AT1	5.36621e-29	-0.510677	0.16	0.329	9.94896e-25	AL-TB vs. Ctrl	Down-Down
NR1D2	AT1	3.87908e-21	-0.426195	0.196	0.329	7.19182e-17	L-TB vs. Ctrl	Down-Down
NR4A1	AT1	2.66156e-109	1.39026	0.621	0.299	4.93454e-105	L-TB vs. Ctrl	Up-Up
NR4A1	AT1	2.151e-09	0.299932	0.621	0.54	3.98795e-05	L-TB vs. AL-TB	Up-Up
NR4A1	AT1	3.35606e-55	1.09033	0.54	0.299	6.22213e-51	AL-TB vs. Ctrl	Up-Up
NR4A2	AT1	2.6144e-07	0.347098	0.248	0.181	0.0048471	AL-TB vs. Ctrl	Up-Up
NR4A2	AT1	9.52384e-24	0.507553	0.316	0.181	1.76572e-19	L-TB vs. Ctrl	Up-Up
NR4A3	AT1	3.39323e-15	0.303876	0.173	0.086	6.29105e-11	L-TB vs. Ctrl	Up-Up
NRBP2	AT1	8.21694e-22	-0.430322	0.204	0.346	1.52342e-17	L-TB vs. Ctrl	Down-Down
NRBP2	AT1	3.49757e-12	-0.325857	0.228	0.346	6.48449e-08	AL-TB vs. Ctrl	Down-Down
NRP2	AT1	4.4772e-15	-0.385698	0.13	0.228	8.30073e-11	L-TB vs. Ctrl	Down-Down
NRP2	AT1	1.83273e-08	-0.297249	0.151	0.228	0.000339789	AL-TB vs. Ctrl	Down-Down
NTM	AT1	9.49879e-25	0.733548	0.457	0.286	1.76108e-20	L-TB vs. AL-TB	Up-Up
NTM	AT1	2.50628e-60	1.69354	0.457	0.24	4.64663e-56	L-TB vs. Ctrl	Up-Up
NUPL1	AT1	1.23501e-13	-0.302484	0.289	0.421	2.28972e-09	AL-TB vs. Ctrl	Down-Down
NUPL1	AT1	2.75539e-11	-0.283629	0.315	0.421	5.10849e-07	L-TB vs. Ctrl	Down-Down
NUPR1	AT1	4.2756e-08	-0.269833	0.545	0.633	0.000792697	AL-TB vs. Ctrl	Other
NUS1	AT1	1.81596e-17	-0.261333	0.084	0.179	3.36678e-13	L-TB vs. Ctrl	Down-Down
NXF1	AT1	1.95379e-08	0.292071	0.194	0.132	0.000362232	L-TB vs. Ctrl	Up-Up
OCLN	AT1	1.67372e-13	-0.259506	0.39	0.52	3.10308e-09	L-TB vs. Ctrl	Down-Down
ODC1	AT1	1.44411e-10	0.297943	0.333	0.249	2.67739e-06	L-TB vs. Ctrl	Up-Up
ODC1	AT1	1.62036e-09	0.3189	0.332	0.249	3.00414e-05	AL-TB vs. Ctrl	Up-Up
OLR1	AT1	4.06938e-07	-0.391877	0.092	0.147	0.00754463	L-TB vs. Ctrl	Down-Down
OSMR	AT1	7.34886e-25	-0.56577	0.221	0.384	1.36248e-20	AL-TB vs. Ctrl	Down-Down
OSMR	AT1	9.20361e-61	-0.81033	0.152	0.384	1.70635e-56	L-TB vs. Ctrl	Down-Down
OTUD1	AT1	2.89212e-12	0.568999	0.394	0.311	5.36199e-08	L-TB vs. Ctrl	Up-Up
OTUD1	AT1	6.04914e-12	0.555175	0.398	0.311	1.12151e-07	AL-TB vs. Ctrl	Up-Up
P4HB	AT1	6.12319e-19	-0.367763	0.483	0.624	1.13524e-14	AL-TB vs. Ctrl	Other
P4HB	AT1	1.90551e-27	-0.451868	0.473	0.624	3.53282e-23	L-TB vs. Ctrl	Other
PABPC1	AT1	1.42393e-10	0.330738	0.627	0.574	2.63997e-06	L-TB vs. Ctrl	Up-Up
PACSIN2	AT1	2.28456e-16	-0.29287	0.22	0.344	4.23558e-12	L-TB vs. Ctrl	Down-Down
PAFAH1B1	AT1	2.55688e-14	-0.364812	0.431	0.557	4.74045e-10	AL-TB vs. Ctrl	Down-Down
PAFAH1B1	AT1	1.28296e-23	-0.43844	0.405	0.557	2.37862e-19	L-TB vs. Ctrl	Down-Down
PAM	AT1	3.53329e-39	-0.657641	0.26	0.468	6.55072e-35	AL-TB vs. Ctrl	Down-Down
PAM	AT1	1.24498e-51	-0.681094	0.241	0.468	2.30819e-47	L-TB vs. Ctrl	Down-Down
PANK3	AT1	8.89486e-21	-0.355639	0.147	0.27	1.64911e-16	L-TB vs. Ctrl	Down-Down
PANK3	AT1	1.40865e-17	-0.351272	0.149	0.27	2.61163e-13	AL-TB vs. Ctrl	Down-Down
PAPSS2	AT1	1.57463e-17	-0.413621	0.484	0.618	2.91936e-13	AL-TB vs. Ctrl	Down-Down
PAPSS2	AT1	4.64336e-22	-0.457398	0.482	0.618	8.60879e-18	L-TB vs. Ctrl	Down-Down
PARD3	AT1	3.59324e-16	-0.338402	0.136	0.24	6.66187e-12	L-TB vs. Ctrl	Down-Down
PARD3	AT1	1.81153e-12	-0.278077	0.14	0.24	3.35858e-08	AL-TB vs. Ctrl	Down-Down
PARP12	AT1	4.58605e-18	-0.307911	0.158	0.279	8.50254e-14	L-TB vs. Ctrl	Down-Down
PARP12	AT1	1.00363e-14	-0.307336	0.162	0.279	1.86073e-10	AL-TB vs. Ctrl	Down-Down
PARP14	AT1	5.809e-27	-0.552422	0.587	0.73	1.07699e-22	L-TB vs. Ctrl	Down-Down
PARP14	AT1	4.04092e-09	-0.314575	0.647	0.73	7.49187e-05	AL-TB vs. Ctrl	Down-Down
PARP4	AT1	2.73304e-17	-0.314443	0.146	0.259	5.06706e-13	L-TB vs. Ctrl	Down-Down
PARP4	AT1	1.63593e-11	-0.28838	0.159	0.259	3.03301e-07	AL-TB vs. Ctrl	Down-Down
PAWR	AT1	1.01883e-13	-0.316718	0.412	0.525	1.88892e-09	L-TB vs. Ctrl	Down-Down
PAXBP1	AT1	9.6008e-15	-0.383472	0.156	0.27	1.77999e-10	AL-TB vs. Ctrl	Down-Down
PCBP1	AT1	7.1939e-09	0.253964	0.703	0.638	0.000133375	L-TB vs. Ctrl	Up-Up
PCBP1	AT1	7.91549e-10	0.29512	0.7	0.638	1.46753e-05	AL-TB vs. Ctrl	Up-Up
PCF11	AT1	2.22816e-08	0.343614	0.267	0.198	0.000413102	L-TB vs. Ctrl	Up-Up
PCF11	AT1	1.81283e-06	0.365929	0.259	0.198	0.03361	AL-TB vs. Ctrl	Up-Up
PCLO	AT1	9.59601e-13	-0.252138	0.088	0.175	1.7791e-08	AL-TB vs. Ctrl	Other
PCSK7	AT1	1.11583e-12	-0.282394	0.221	0.328	2.06875e-08	L-TB vs. Ctrl	Down-Down
PDCD4	AT1	6.55472e-36	0.52887	0.228	0.081	1.21525e-31	L-TB vs. Ctrl	Up-Up
PDCD4	AT1	7.44159e-15	0.403709	0.168	0.081	1.37967e-10	AL-TB vs. Ctrl	Up-Up
PDCD6IP	AT1	1.11817e-18	-0.428095	0.354	0.505	2.07308e-14	AL-TB vs. Ctrl	Down-Down
PDCD6IP	AT1	8.74991e-16	-0.325461	0.377	0.505	1.62223e-11	L-TB vs. Ctrl	Down-Down
PDDC1	AT1	2.2628e-24	-0.305139	0.068	0.181	4.19524e-20	L-TB vs. Ctrl	Down-Down
PDE4D	AT1	2.90343e-13	-0.336894	0.206	0.319	5.38296e-09	AL-TB vs. Ctrl	Other
PDLIM2	AT1	2.98411e-11	-0.357197	0.404	0.497	5.53253e-07	L-TB vs. AL-TB	Down-Down
PDLIM2	AT1	3.53528e-21	-0.527391	0.404	0.546	6.55441e-17	L-TB vs. Ctrl	Down-Down
PDPN	AT1	2.71535e-09	-0.266799	0.364	0.478	5.03426e-05	AL-TB vs. Ctrl	Other
PDXDC1	AT1	4.4888e-13	-0.285621	0.181	0.281	8.32224e-09	L-TB vs. Ctrl	Down-Down
PEAK1	AT1	4.28016e-21	-0.475144	0.302	0.449	7.93541e-17	L-TB vs. Ctrl	Down-Down
PEAK1	AT1	8.55803e-15	-0.3688	0.312	0.449	1.58666e-10	AL-TB vs. Ctrl	Down-Down
PEBP4	AT1	1.04271e-25	-0.541411	0.352	0.514	1.93319e-21	L-TB vs. Ctrl	Down-Down
PEBP4	AT1	4.54812e-25	-0.523179	0.338	0.514	8.43221e-21	AL-TB vs. Ctrl	Down-Down
PER1	AT1	2.46527e-08	0.289136	0.429	0.339	0.000457061	L-TB vs. AL-TB	Up-Up
PER1	AT1	4.15066e-11	0.377389	0.429	0.35	7.69533e-07	L-TB vs. Ctrl	Up-Up
PER2	AT1	7.81479e-13	0.289484	0.147	0.074	1.44886e-08	L-TB vs. Ctrl	Up-Up
PER2	AT1	5.33909e-11	0.289516	0.144	0.074	9.89867e-07	AL-TB vs. Ctrl	Up-Up
PER3	AT1	1.53949e-21	-0.399153	0.122	0.257	2.85421e-17	AL-TB vs. Ctrl	Down-Down
PER3	AT1	6.42419e-17	-0.276873	0.142	0.257	1.19104e-12	L-TB vs. Ctrl	Down-Down
PFDN5	AT1	6.64931e-09	0.252335	0.664	0.639	0.000123278	L-TB vs. Ctrl	Other
PFKFB2	AT1	9.16613e-15	-0.335142	0.089	0.186	1.6994e-10	AL-TB vs. Ctrl	Down-Down
PFKFB2	AT1	1.09847e-26	-0.40864	0.069	0.186	2.03657e-22	L-TB vs. Ctrl	Down-Down
PFN1	AT1	3.00615e-09	0.266058	0.787	0.754	5.57339e-05	AL-TB vs. Ctrl	Up-Up
PGC	AT1	1.94609e-33	-0.955621	0.053	0.195	3.60806e-29	AL-TB vs. Ctrl	Down-Down
PGC	AT1	2.65107e-35	-0.892486	0.061	0.195	4.91508e-31	L-TB vs. Ctrl	Down-Down
PGP	AT1	6.94174e-11	-0.314788	0.185	0.284	1.287e-06	AL-TB vs. Ctrl	Down-Down
PGP	AT1	1.47485e-12	-0.254398	0.182	0.284	2.73437e-08	L-TB vs. Ctrl	Down-Down
PHC2	AT1	1.4599e-15	-0.314063	0.17	0.279	2.70665e-11	L-TB vs. Ctrl	Down-Down
PHF1	AT1	2.03228e-09	0.26987	0.211	0.135	3.76785e-05	AL-TB vs. Ctrl	Other
PHF3	AT1	2.15403e-08	-0.278524	0.35	0.441	0.000399356	AL-TB vs. Ctrl	Other
PHKB	AT1	3.46439e-13	-0.314899	0.281	0.403	6.42298e-09	AL-TB vs. Ctrl	Down-Down
PHKB	AT1	8.29461e-24	-0.4034	0.249	0.403	1.53782e-19	L-TB vs. Ctrl	Down-Down
PHLDA2	AT1	1.09288e-06	0.449087	0.192	0.138	0.020262	L-TB vs. Ctrl	Up-Up
PHLDA2	AT1	7.86961e-08	-0.295483	0.192	0.267	0.00145903	L-TB vs. AL-TB	Up-Up
PHLDA2	AT1	2.62598e-23	0.74457	0.267	0.138	4.86856e-19	AL-TB vs. Ctrl	Up-Up
PHLDB2	AT1	6.29253e-09	-0.471891	0.479	0.558	0.000116664	AL-TB vs. Ctrl	Down-Down
PHLDB2	AT1	5.25928e-21	-0.632249	0.424	0.558	9.7507e-17	L-TB vs. Ctrl	Down-Down
PI4K2B	AT1	3.19002e-10	-0.251706	0.103	0.181	5.91429e-06	AL-TB vs. Ctrl	Other
PIEZO1	AT1	6.62402e-09	-0.279721	0.252	0.341	0.000122809	L-TB vs. Ctrl	Down-Down
PIEZO1	AT1	1.55058e-10	-0.316382	0.252	0.347	2.87478e-06	L-TB vs. AL-TB	Down-Down
PIK3C2A	AT1	3.53074e-10	-0.29927	0.235	0.333	6.546e-06	AL-TB vs. Ctrl	Down-Down
PIK3CB	AT1	7.93946e-14	-0.261814	0.073	0.15	1.47198e-09	L-TB vs. Ctrl	Down-Down
PIM1	AT1	1.158e-15	0.51778	0.313	0.206	2.14694e-11	AL-TB vs. Ctrl	Up-Up
PITRM1	AT1	3.75819e-16	-0.273759	0.105	0.203	6.96769e-12	L-TB vs. Ctrl	Down-Down
PKDCC	AT1	2.93379e-12	-0.298119	0.298	0.417	5.43925e-08	L-TB vs. Ctrl	Down-Down
PKDCC	AT1	3.49643e-18	-0.419845	0.265	0.417	6.48239e-14	AL-TB vs. Ctrl	Down-Down
PKM	AT1	7.35552e-10	-0.255158	0.476	0.578	1.36371e-05	L-TB vs. Ctrl	Down-Down
PKP3	AT1	6.6655e-23	-0.29893	0.137	0.275	1.23578e-18	L-TB vs. Ctrl	Down-Down
PLA2G16	AT1	2.05546e-10	-0.299904	0.376	0.486	3.81083e-06	AL-TB vs. Ctrl	Down-Down
PLA2G16	AT1	2.93829e-16	-0.363277	0.356	0.486	5.44759e-12	L-TB vs. Ctrl	Down-Down
PLAUR	AT1	7.26539e-10	-0.287327	0.193	0.279	1.347e-05	L-TB vs. Ctrl	Down-Down
PLAUR	AT1	1.62748e-06	-0.445133	0.193	0.258	0.0301735	L-TB vs. AL-TB	Down-Down
PLD3	AT1	7.3753e-11	-0.269878	0.305	0.409	1.36738e-06	L-TB vs. Ctrl	Down-Down
PLEKHH2	AT1	1.3826e-09	-0.278155	0.212	0.3	2.56334e-05	L-TB vs. Ctrl	Down-Down
PLEKHO1	AT1	1.174e-16	0.689406	0.426	0.317	2.1766e-12	AL-TB vs. Ctrl	Other
PLK3	AT1	1.73023e-18	0.422028	0.226	0.12	3.20784e-14	L-TB vs. Ctrl	Up-Up
PLK3	AT1	1.23575e-27	0.577297	0.265	0.12	2.29107e-23	AL-TB vs. Ctrl	Up-Up
PLS3	AT1	1.91005e-46	-0.71117	0.562	0.718	3.54124e-42	AL-TB vs. Ctrl	Down-Down
PLS3	AT1	1.47385e-49	-0.681104	0.559	0.718	2.73251e-45	L-TB vs. Ctrl	Down-Down
PLXNA1	AT1	2.38272e-15	-0.332384	0.287	0.415	4.41757e-11	L-TB vs. Ctrl	Down-Down
PLXNA1	AT1	1.34485e-12	-0.35753	0.298	0.415	2.49336e-08	AL-TB vs. Ctrl	Down-Down
PLXNA2	AT1	9.3198e-13	-0.263359	0.139	0.231	1.72789e-08	L-TB vs. Ctrl	Down-Down
PM20D2	AT1	5.97297e-13	-0.265582	0.063	0.141	1.10739e-08	AL-TB vs. Ctrl	Down-Down
PMAIP1	AT1	1.1299e-27	0.653021	0.233	0.105	2.09484e-23	L-TB vs. Ctrl	Up-Up
PMAIP1	AT1	3.27668e-18	0.500385	0.211	0.105	6.07497e-14	AL-TB vs. Ctrl	Up-Up
PMM2	AT1	1.0869e-13	-0.292902	0.109	0.197	2.01512e-09	L-TB vs. Ctrl	Down-Down
PMP22	AT1	3.80076e-08	-0.256296	0.112	0.182	0.000704661	AL-TB vs. Ctrl	Down-Down
PNN	AT1	1.53139e-08	-0.288555	0.409	0.497	0.00028392	L-TB vs. Ctrl	Down-Down
PNPLA2	AT1	1.33483e-06	0.30691	0.531	0.489	0.0247478	AL-TB vs. Ctrl	Up-Up
PNPT1	AT1	1.9247e-19	-0.344735	0.125	0.254	3.56839e-15	AL-TB vs. Ctrl	Down-Down
PNPT1	AT1	2.73542e-26	-0.366225	0.117	0.254	5.07146e-22	L-TB vs. Ctrl	Down-Down
PNRC1	AT1	1.24319e-24	0.399967	0.743	0.662	2.30487e-20	L-TB vs. Ctrl	Up-Up
POGK	AT1	1.49959e-18	-0.390888	0.253	0.4	2.78024e-14	AL-TB vs. Ctrl	Down-Down
POGK	AT1	9.40936e-17	-0.308195	0.269	0.4	1.7445e-12	L-TB vs. Ctrl	Down-Down
POLK	AT1	1.68659e-13	-0.256815	0.211	0.325	3.12695e-09	L-TB vs. Ctrl	Down-Down
POLR2B	AT1	1.08885e-13	-0.30183	0.193	0.31	2.01873e-09	AL-TB vs. Ctrl	Down-Down
POLR2B	AT1	4.33016e-15	-0.306766	0.197	0.31	8.02811e-11	L-TB vs. Ctrl	Down-Down
PON2	AT1	9.74134e-19	-0.356964	0.491	0.628	1.80605e-14	L-TB vs. Ctrl	Down-Down
PPA1	AT1	7.40303e-14	-0.333054	0.591	0.669	1.37252e-09	AL-TB vs. Ctrl	Other
PPA1	AT1	7.29464e-09	-0.265543	0.63	0.669	0.000135243	L-TB vs. Ctrl	Other
PPAP2A	AT1	2.01026e-17	-0.303916	0.092	0.189	3.72702e-13	L-TB vs. Ctrl	Down-Down
PPDPF	AT1	2.86969e-33	0.568219	0.71	0.581	5.32041e-29	L-TB vs. Ctrl	Up-Up
PPDPF	AT1	5.3103e-21	0.497118	0.677	0.581	9.8453e-17	AL-TB vs. Ctrl	Up-Up
PPFIA1	AT1	1.22236e-28	-0.37304	0.124	0.274	2.26626e-24	L-TB vs. Ctrl	Down-Down
PPFIA1	AT1	5.07294e-17	-0.341488	0.151	0.274	9.40524e-13	AL-TB vs. Ctrl	Down-Down
PPP1R10	AT1	6.5492e-19	0.476913	0.447	0.311	1.21422e-14	AL-TB vs. Ctrl	Up-Up
PPP1R10	AT1	5.20985e-16	0.391942	0.426	0.311	9.65907e-12	L-TB vs. Ctrl	Up-Up
PPP1R15A	AT1	1.39559e-83	0.869478	0.776	0.553	2.58742e-79	L-TB vs. Ctrl	Up-Up
PPP1R15A	AT1	1.09126e-53	0.693067	0.751	0.553	2.02319e-49	AL-TB vs. Ctrl	Up-Up
PPP1R2	AT1	6.76035e-13	0.402382	0.347	0.254	1.25337e-08	L-TB vs. Ctrl	Up-Up
PPP2CB	AT1	6.35656e-20	-0.397541	0.351	0.493	1.17851e-15	L-TB vs. Ctrl	Down-Down
PPP2CB	AT1	9.50882e-15	-0.352949	0.362	0.493	1.76294e-10	AL-TB vs. Ctrl	Down-Down
PPP2R5A	AT1	1.51141e-07	-0.278948	0.292	0.375	0.00280215	AL-TB vs. Ctrl	Other
PPP3CA	AT1	4.29548e-08	-0.265023	0.341	0.435	0.000796383	AL-TB vs. Ctrl	Down-Down
PPP6R2	AT1	2.20364e-17	-0.315615	0.155	0.267	4.08555e-13	L-TB vs. Ctrl	Down-Down
PPP6R2	AT1	9.15833e-19	-0.330106	0.139	0.267	1.69795e-14	AL-TB vs. Ctrl	Down-Down
PRELID1	AT1	2.50527e-09	-0.26109	0.298	0.39	4.64476e-05	L-TB vs. Ctrl	Down-Down
PRF1	AT1	3.94043e-08	0.253107	0.128	0.073	0.000730556	L-TB vs. Ctrl	Up-Up
PRKAR1A	AT1	3.91233e-18	-0.37211	0.563	0.656	7.25347e-14	L-TB vs. Ctrl	Down-Down
PRKAR1A	AT1	3.4735e-17	-0.356577	0.551	0.656	6.43987e-13	AL-TB vs. Ctrl	Down-Down
PRKCZ	AT1	3.47529e-23	-0.42161	0.377	0.543	6.44318e-19	L-TB vs. Ctrl	Down-Down
PRKCZ	AT1	1.10137e-19	-0.409898	0.377	0.543	2.04195e-15	AL-TB vs. Ctrl	Down-Down
PRODH	AT1	9.40076e-14	-0.316828	0.145	0.252	1.7429e-09	AL-TB vs. Ctrl	Down-Down
PRODH	AT1	1.59683e-15	-0.301433	0.146	0.252	2.96051e-11	L-TB vs. Ctrl	Down-Down
PROS1	AT1	1.80902e-35	-0.558319	0.277	0.473	3.35393e-31	L-TB vs. Ctrl	Down-Down
PROS1	AT1	1.78812e-35	-0.663201	0.27	0.473	3.31517e-31	AL-TB vs. Ctrl	Down-Down
PRPF39	AT1	4.42387e-12	-0.27674	0.075	0.154	8.20186e-08	AL-TB vs. Ctrl	Down-Down
PRPF8	AT1	5.52003e-12	-0.29786	0.287	0.392	1.02341e-07	L-TB vs. Ctrl	Down-Down
PRPF8	AT1	1.4791e-14	-0.29587	0.262	0.392	2.74225e-10	AL-TB vs. Ctrl	Down-Down
PRR14L	AT1	9.81838e-17	-0.292746	0.11	0.211	1.82033e-12	L-TB vs. Ctrl	Down-Down
PRRC2B	AT1	9.01113e-14	-0.348966	0.273	0.383	1.67066e-09	L-TB vs. Ctrl	Down-Down
PRRC2C	AT1	3.6423e-12	-0.334122	0.561	0.661	6.75282e-08	L-TB vs. Ctrl	Down-Down
PRRC2C	AT1	3.09669e-09	-0.28003	0.556	0.661	5.74126e-05	AL-TB vs. Ctrl	Down-Down
PRSS22	AT1	1.69451e-10	0.296513	0.166	0.093	3.14162e-06	AL-TB vs. Ctrl	Other
PSAP	AT1	6.28988e-20	-0.410295	0.571	0.667	1.16614e-15	L-TB vs. Ctrl	Down-Down
PSMA6	AT1	1.65321e-09	-0.291852	0.109	0.184	3.06504e-05	AL-TB vs. Ctrl	Down-Down
PSMA6	AT1	9.69391e-17	-0.325628	0.09	0.184	1.79725e-12	L-TB vs. Ctrl	Down-Down
PSMD1	AT1	5.44689e-13	-0.358707	0.23	0.345	1.00985e-08	AL-TB vs. Ctrl	Down-Down
PSMD1	AT1	9.14381e-21	-0.388566	0.206	0.345	1.69526e-16	L-TB vs. Ctrl	Down-Down
PSMD11	AT1	2.44711e-08	-0.258295	0.27	0.354	0.000453694	L-TB vs. Ctrl	Down-Down
PSMD12	AT1	1.47111e-12	-0.273172	0.259	0.367	2.72743e-08	L-TB vs. Ctrl	Down-Down
PSMD12	AT1	2.35679e-15	-0.296874	0.235	0.367	4.36949e-11	AL-TB vs. Ctrl	Down-Down
PSMD14	AT1	3.4885e-13	-0.297481	0.171	0.268	6.46769e-09	L-TB vs. Ctrl	Down-Down
PSMD2	AT1	8.93203e-19	-0.328418	0.227	0.361	1.656e-14	L-TB vs. Ctrl	Down-Down
PSME1	AT1	2.34462e-06	0.250182	0.566	0.521	0.0434693	L-TB vs. Ctrl	Up-Up
PTAR1	AT1	6.34615e-14	-0.25841	0.206	0.329	1.17658e-09	AL-TB vs. Ctrl	Down-Down
PTAR1	AT1	2.07816e-22	-0.36439	0.186	0.329	3.85291e-18	L-TB vs. Ctrl	Down-Down
PTBP3	AT1	1.89242e-13	-0.335133	0.291	0.407	3.50855e-09	L-TB vs. Ctrl	Down-Down
PTBP3	AT1	2.29062e-09	-0.258749	0.303	0.407	4.24682e-05	AL-TB vs. Ctrl	Down-Down
PTGS2	AT1	4.95763e-38	1.272	0.551	0.4	9.19144e-34	AL-TB vs. Ctrl	Up-Up
PTGS2	AT1	2.25582e-20	0.844971	0.502	0.4	4.1823e-16	L-TB vs. Ctrl	Up-Up
PTMA	AT1	3.36678e-89	0.711121	0.944	0.88	6.24201e-85	L-TB vs. Ctrl	Up-Up
PTMA	AT1	2.40499e-45	0.583408	0.931	0.88	4.45884e-41	AL-TB vs. Ctrl	Up-Up
PTPN1	AT1	2.54379e-11	-0.257895	0.492	0.595	4.71619e-07	L-TB vs. Ctrl	Other
PTPN11	AT1	5.10547e-17	-0.399864	0.199	0.325	9.46555e-13	AL-TB vs. Ctrl	Down-Down
PTPN11	AT1	5.26015e-23	-0.43363	0.187	0.325	9.75233e-19	L-TB vs. Ctrl	Down-Down
PTPN12	AT1	1.4088e-14	-0.354199	0.313	0.443	2.61191e-10	AL-TB vs. Ctrl	Down-Down
PTPN12	AT1	7.06207e-15	-0.377687	0.328	0.443	1.30931e-10	L-TB vs. Ctrl	Down-Down
PTPRC	AT1	2.35404e-09	0.509278	0.278	0.198	4.36439e-05	AL-TB vs. Ctrl	Up-Up
PTPRC	AT1	6.38449e-22	0.72669	0.326	0.198	1.18369e-17	L-TB vs. Ctrl	Up-Up
PTPRCAP	AT1	3.65402e-28	0.545565	0.221	0.091	6.77456e-24	L-TB vs. Ctrl	Up-Up
PTPRCAP	AT1	9.77275e-18	0.482404	0.193	0.091	1.81187e-13	AL-TB vs. Ctrl	Up-Up
PTPRE	AT1	6.71645e-15	-0.364078	0.462	0.592	1.24523e-10	AL-TB vs. Ctrl	Down-Down
PTPRE	AT1	1.26939e-36	-0.554615	0.395	0.592	2.35345e-32	L-TB vs. Ctrl	Down-Down
PTPRF	AT1	3.54879e-19	-0.3498	0.527	0.649	6.57946e-15	L-TB vs. Ctrl	Other
PTPRM	AT1	1.07956e-15	-0.329377	0.17	0.282	2.0015e-11	L-TB vs. Ctrl	Down-Down
PTPRM	AT1	3.17708e-12	-0.305118	0.176	0.282	5.89031e-08	AL-TB vs. Ctrl	Down-Down
PTRF	AT1	1.80781e-14	0.613116	0.607	0.529	3.35169e-10	AL-TB vs. Ctrl	Other
PTRF	AT1	4.19496e-11	-0.469301	0.529	0.607	7.77745e-07	L-TB vs. AL-TB	Other
PTTG1IP	AT1	3.92028e-34	-0.513874	0.506	0.674	7.2682e-30	L-TB vs. Ctrl	Down-Down
PTTG1IP	AT1	9.69328e-11	-0.268907	0.565	0.674	1.79713e-06	AL-TB vs. Ctrl	Down-Down
PVR	AT1	5.16223e-21	-0.291973	0.087	0.196	9.57077e-17	L-TB vs. Ctrl	Down-Down
PVR	AT1	3.50094e-13	-0.265783	0.102	0.196	6.49075e-09	AL-TB vs. Ctrl	Down-Down
QKI	AT1	2.16061e-18	-0.364228	0.648	0.748	4.00578e-14	L-TB vs. Ctrl	Down-Down
QKI	AT1	5.13334e-17	-0.359863	0.632	0.748	9.51721e-13	AL-TB vs. Ctrl	Down-Down
QSOX1	AT1	2.05171e-07	-0.306517	0.113	0.172	0.00380388	L-TB vs. AL-TB	Down-Down
RAB10	AT1	1.91146e-24	-0.424539	0.297	0.455	3.54384e-20	L-TB vs. Ctrl	Down-Down
RAB10	AT1	2.51381e-09	-0.267856	0.355	0.455	4.66061e-05	AL-TB vs. Ctrl	Down-Down
RAB11FIP2	AT1	2.0854e-16	-0.299145	0.147	0.258	3.86633e-12	L-TB vs. Ctrl	Down-Down
RAB11FIP2	AT1	2.90931e-17	-0.298614	0.134	0.258	5.39387e-13	AL-TB vs. Ctrl	Down-Down
RAB12	AT1	1.9495e-17	-0.266541	0.075	0.178	3.61437e-13	AL-TB vs. Ctrl	Other
RAB31	AT1	1.04324e-09	-0.363457	0.387	0.472	1.93416e-05	L-TB vs. AL-TB	Down-Down
RAB32	AT1	3.33047e-08	0.31788	0.422	0.349	0.00061747	AL-TB vs. Ctrl	Other
RAB3GAP2	AT1	6.30519e-17	-0.284818	0.158	0.274	1.16898e-12	L-TB vs. Ctrl	Down-Down
RAB6A	AT1	4.59709e-16	-0.329407	0.29	0.434	8.52301e-12	AL-TB vs. Ctrl	Down-Down
RABAC1	AT1	1.26542e-12	-0.299322	0.555	0.645	2.34608e-08	L-TB vs. Ctrl	Down-Down
RAC1	AT1	6.72353e-15	-0.302226	0.685	0.757	1.24654e-10	L-TB vs. Ctrl	Down-Down
RAC2	AT1	7.19051e-21	0.404744	0.196	0.089	1.33312e-16	L-TB vs. Ctrl	Up-Up
RAC2	AT1	1.50535e-12	0.328451	0.172	0.089	2.79091e-08	AL-TB vs. Ctrl	Up-Up
RAD23B	AT1	2.48837e-11	-0.262441	0.236	0.339	4.61343e-07	L-TB vs. Ctrl	Down-Down
RAD50	AT1	1.70597e-18	-0.32799	0.255	0.394	3.16286e-14	L-TB vs. Ctrl	Down-Down
RAD50	AT1	4.79311e-16	-0.334834	0.258	0.394	8.88643e-12	AL-TB vs. Ctrl	Down-Down
RALGDS	AT1	1.96492e-16	0.50067	0.301	0.191	3.64296e-12	AL-TB vs. Ctrl	Up-Up
RALGDS	AT1	2.78707e-11	-0.367002	0.209	0.301	5.16723e-07	L-TB vs. AL-TB	Up-Up
RARRES3	AT1	5.29577e-18	-0.576112	0.549	0.649	9.81836e-14	AL-TB vs. Ctrl	Other
RARRES3	AT1	9.92689e-10	-0.405869	0.6	0.649	1.84045e-05	L-TB vs. Ctrl	Other
RARS	AT1	7.57925e-14	-0.283071	0.131	0.225	1.40519e-09	L-TB vs. Ctrl	Down-Down
RASAL2	AT1	1.03224e-17	-0.35178	0.199	0.325	1.91378e-13	L-TB vs. Ctrl	Down-Down
RASD1	AT1	2.164e-09	0.491561	0.192	0.126	4.01205e-05	L-TB vs. Ctrl	Up-Up
RASEF	AT1	5.05324e-12	-0.251378	0.067	0.135	9.3687e-08	L-TB vs. Ctrl	Down-Down
RASSF4	AT1	1.31442e-07	-0.299946	0.192	0.269	0.00243694	AL-TB vs. Ctrl	Down-Down
RASSF4	AT1	2.34875e-15	-0.306314	0.159	0.269	4.35458e-11	L-TB vs. Ctrl	Down-Down
RBM25	AT1	5.98078e-07	-0.28298	0.514	0.591	0.0110884	AL-TB vs. Ctrl	Other
RBM25	AT1	8.33456e-07	-0.290936	0.522	0.591	0.0154523	L-TB vs. Ctrl	Other
RBM26	AT1	1.01539e-13	-0.318021	0.241	0.362	1.88254e-09	AL-TB vs. Ctrl	Down-Down
RBM3	AT1	2.70865e-33	-0.679456	0.525	0.659	5.02185e-29	L-TB vs. Ctrl	Down-Down
RBM3	AT1	9.01759e-29	-0.676084	0.528	0.659	1.67186e-24	AL-TB vs. Ctrl	Down-Down
RBM33	AT1	1.40142e-21	-0.4677	0.216	0.356	2.59824e-17	L-TB vs. Ctrl	Down-Down
RBM33	AT1	1.72208e-18	-0.394016	0.215	0.356	3.19273e-14	AL-TB vs. Ctrl	Down-Down
RBM38	AT1	1.23185e-14	0.28785	0.169	0.081	2.28385e-10	AL-TB vs. Ctrl	Up-Up
RBM8A	AT1	5.66844e-13	0.32755	0.483	0.396	1.05093e-08	L-TB vs. Ctrl	Up-Up
RBMS1	AT1	3.209e-07	-0.29463	0.465	0.53	0.00594949	L-TB vs. AL-TB	Other
RBMS3	AT1	5.23113e-16	-0.377515	0.409	0.538	9.69852e-12	AL-TB vs. Ctrl	Down-Down
RBMS3	AT1	1.2243e-12	-0.315961	0.439	0.538	2.26985e-08	L-TB vs. Ctrl	Down-Down
RC3H2	AT1	9.873e-14	-0.309843	0.15	0.256	1.83045e-09	AL-TB vs. Ctrl	Other
RC3H2	AT1	1.32404e-13	-0.272483	0.157	0.256	2.45477e-09	L-TB vs. Ctrl	Other
RCAN1	AT1	8.89574e-27	1.00428	0.379	0.251	1.64927e-22	L-TB vs. Ctrl	Up-Up
RCAN1	AT1	3.78738e-18	0.790116	0.365	0.251	7.0218e-14	AL-TB vs. Ctrl	Up-Up
RCOR3	AT1	7.71338e-13	-0.25326	0.167	0.274	1.43006e-08	AL-TB vs. Ctrl	Down-Down
RCOR3	AT1	1.95219e-13	-0.279131	0.172	0.274	3.61937e-09	L-TB vs. Ctrl	Down-Down
REL	AT1	3.65139e-09	0.455263	0.426	0.354	6.76968e-05	AL-TB vs. Ctrl	Up-Up
REL	AT1	9.57305e-12	0.469453	0.435	0.354	1.77484e-07	L-TB vs. Ctrl	Up-Up
REPS2	AT1	6.54446e-15	-0.33958	0.183	0.294	1.21334e-10	L-TB vs. Ctrl	Down-Down
REPS2	AT1	1.82835e-17	-0.401151	0.165	0.294	3.38975e-13	AL-TB vs. Ctrl	Down-Down
REST	AT1	4.50894e-09	-0.253176	0.197	0.287	8.35958e-05	AL-TB vs. Ctrl	Other
RETSAT	AT1	1.51828e-26	-0.347054	0.1	0.232	2.81488e-22	L-TB vs. Ctrl	Down-Down
RFX2	AT1	6.34064e-38	0.605361	0.216	0.065	1.17555e-33	AL-TB vs. Ctrl	Up-Up
RFX2	AT1	1.91922e-16	-0.387459	0.115	0.216	3.55824e-12	L-TB vs. AL-TB	Up-Up
RGCC	AT1	9.35414e-66	0.986865	0.813	0.637	1.73426e-61	L-TB vs. Ctrl	Up-Up
RGCC	AT1	3.72927e-49	0.797562	0.807	0.637	6.91407e-45	AL-TB vs. Ctrl	Up-Up
RGS1	AT1	2.05111e-18	0.489205	0.179	0.082	3.80276e-14	L-TB vs. Ctrl	Up-Up
RGS10	AT1	2.13215e-14	0.291739	0.128	0.056	3.953e-10	L-TB vs. Ctrl	Up-Up
RGS16	AT1	6.59044e-20	0.586926	0.338	0.204	1.22187e-15	AL-TB vs. Ctrl	Up-Up
RGS16	AT1	1.31316e-07	-0.443613	0.261	0.338	0.00243459	L-TB vs. AL-TB	Up-Up
RGS2	AT1	3.90148e-08	0.272628	0.197	0.131	0.000723335	L-TB vs. Ctrl	Other
RHOB	AT1	2.08959e-39	0.792387	0.576	0.402	3.87409e-35	L-TB vs. Ctrl	Up-Up
RHOB	AT1	2.95878e-19	0.65395	0.523	0.402	5.48557e-15	AL-TB vs. Ctrl	Up-Up
RHOBTB2	AT1	1.22236e-58	-0.774306	0.198	0.44	2.26625e-54	L-TB vs. Ctrl	Down-Down
RHOBTB2	AT1	2.39581e-47	-0.789128	0.208	0.44	4.44182e-43	AL-TB vs. Ctrl	Down-Down
RHOBTB3	AT1	9.76676e-22	-0.468677	0.388	0.554	1.81076e-17	AL-TB vs. Ctrl	Other
RHOBTB3	AT1	1.88199e-10	-0.322522	0.46	0.554	3.48921e-06	L-TB vs. Ctrl	Other
RHOH	AT1	7.77658e-28	0.407126	0.13	0.031	1.44178e-23	L-TB vs. Ctrl	Up-Up
RHOH	AT1	2.11938e-19	0.330535	0.11	0.031	3.92933e-15	AL-TB vs. Ctrl	Up-Up
RHOQ	AT1	1.12079e-13	-0.261648	0.186	0.304	2.07794e-09	AL-TB vs. Ctrl	Down-Down
RHOQ	AT1	4.37765e-19	-0.272484	0.175	0.304	8.11616e-15	L-TB vs. Ctrl	Down-Down
RHOU	AT1	3.45539e-16	-0.360141	0.14	0.256	6.40629e-12	AL-TB vs. Ctrl	Down-Down
RHOU	AT1	6.6891e-21	-0.379902	0.132	0.256	1.24016e-16	L-TB vs. Ctrl	Down-Down
RIF1	AT1	2.68966e-10	-0.30763	0.26	0.363	4.98663e-06	AL-TB vs. Ctrl	Down-Down
RIF1	AT1	9.40297e-12	-0.322635	0.261	0.363	1.74331e-07	L-TB vs. Ctrl	Down-Down
RIMKLA	AT1	1.85444e-21	-0.255214	0.088	0.202	3.43813e-17	L-TB vs. Ctrl	Down-Down
RMDN1	AT1	4.73126e-15	-0.315502	0.142	0.253	8.77175e-11	AL-TB vs. Ctrl	Down-Down
RMDN1	AT1	5.52254e-23	-0.357519	0.125	0.253	1.02388e-18	L-TB vs. Ctrl	Down-Down
RNASE1	AT1	1.41429e-08	0.3917	0.895	0.899	0.00026221	AL-TB vs. Ctrl	Up-Up
RNASE4	AT1	8.12065e-13	0.287573	0.145	0.074	1.50557e-08	L-TB vs. Ctrl	Up-Up
RND1	AT1	7.52684e-12	-0.735829	0.088	0.166	1.39548e-07	AL-TB vs. Ctrl	Down-Down
RND1	AT1	2.28707e-37	-0.932285	0.04	0.166	4.24023e-33	L-TB vs. Ctrl	Down-Down
RND3	AT1	7.38847e-11	0.603214	0.351	0.27	1.36982e-06	AL-TB vs. Ctrl	Other
RND3	AT1	2.72423e-07	0.524787	0.327	0.27	0.00505073	L-TB vs. Ctrl	Other
RNF144B	AT1	2.88923e-12	-0.329944	0.274	0.392	5.35663e-08	AL-TB vs. Ctrl	Other
RNF145	AT1	6.79015e-18	-0.350612	0.467	0.596	1.25889e-13	L-TB vs. Ctrl	Down-Down
RNF145	AT1	2.88949e-14	-0.347479	0.483	0.596	5.35712e-10	AL-TB vs. Ctrl	Down-Down
RNF169	AT1	1.16345e-09	-0.259657	0.15	0.239	2.15704e-05	AL-TB vs. Ctrl	Down-Down
RNF169	AT1	2.04798e-12	-0.287921	0.147	0.239	3.79696e-08	L-TB vs. Ctrl	Down-Down
RNF213	AT1	1.51704e-26	-0.644362	0.579	0.71	2.81259e-22	L-TB vs. Ctrl	Down-Down
RNF213	AT1	7.6017e-24	-0.606517	0.572	0.71	1.40936e-19	AL-TB vs. Ctrl	Down-Down
ROR1	AT1	1.106e-25	-0.437733	0.241	0.404	2.05052e-21	L-TB vs. Ctrl	Down-Down
RP1	AT1	2.83302e-07	0.414242	0.221	0.151	0.00525242	L-TB vs. AL-TB	Up-Up
RPL10	AT1	5.78977e-76	0.70085	0.982	0.943	1.07342e-71	L-TB vs. Ctrl	Up-Up
RPL10	AT1	5.03568e-18	0.397166	0.956	0.943	9.33614e-14	AL-TB vs. Ctrl	Up-Up
RPL10	AT1	6.34134e-17	0.303684	0.982	0.956	1.17568e-12	L-TB vs. AL-TB	Up-Up
RPL10A	AT1	1.58714e-18	0.698703	0.718	0.675	2.94256e-14	L-TB vs. Ctrl	Up-Up
RPL10A	AT1	2.99592e-11	0.444965	0.702	0.675	5.55443e-07	AL-TB vs. Ctrl	Up-Up
RPL11	AT1	2.28112e-09	0.29103	0.913	0.863	4.2292e-05	L-TB vs. AL-TB	Up-Up
RPL11	AT1	1.81845e-50	0.711562	0.913	0.849	3.3714e-46	L-TB vs. Ctrl	Up-Up
RPL11	AT1	5.72877e-16	0.420533	0.863	0.849	1.06211e-11	AL-TB vs. Ctrl	Up-Up
RPL12	AT1	3.0989e-09	0.334958	0.803	0.79	5.74536e-05	AL-TB vs. Ctrl	Up-Up
RPL12	AT1	1.38282e-38	0.651883	0.864	0.79	2.56375e-34	L-TB vs. Ctrl	Up-Up
RPL12	AT1	5.08745e-10	0.316925	0.864	0.803	9.43214e-06	L-TB vs. AL-TB	Up-Up
RPL13	AT1	8.6852e-10	0.315813	0.928	0.899	1.61024e-05	L-TB vs. AL-TB	Up-Up
RPL13	AT1	3.84276e-16	0.570118	0.928	0.899	7.12447e-12	L-TB vs. Ctrl	Up-Up
RPL13A	AT1	8.73713e-11	0.45747	0.783	0.735	1.61986e-06	L-TB vs. AL-TB	Down-Down
RPL13A	AT1	4.27568e-18	-0.479432	0.735	0.788	7.92712e-14	AL-TB vs. Ctrl	Down-Down
RPL14	AT1	1.00169e-09	0.294986	0.836	0.801	1.85714e-05	L-TB vs. AL-TB	Up-Up
RPL14	AT1	3.29253e-23	0.480799	0.836	0.794	6.10435e-19	L-TB vs. Ctrl	Up-Up
RPL15	AT1	4.3544e-08	0.320717	0.83	0.826	0.000807306	L-TB vs. Ctrl	Other
RPL17	AT1	7.85928e-15	0.453891	0.473	0.365	1.45711e-10	L-TB vs. AL-TB	Up-Up
RPL17	AT1	1.70468e-23	0.520529	0.473	0.354	3.16048e-19	L-TB vs. Ctrl	Up-Up
RPL18	AT1	1.42412e-08	0.263607	0.873	0.834	0.000264031	L-TB vs. AL-TB	Up-Up
RPL18	AT1	1.41123e-19	0.439381	0.873	0.839	2.61642e-15	L-TB vs. Ctrl	Up-Up
RPL18A	AT1	7.89117e-18	0.455059	0.855	0.817	1.46302e-13	L-TB vs. Ctrl	Other
RPL19	AT1	1.76604e-26	0.534799	0.88	0.852	3.27424e-22	L-TB vs. Ctrl	Other
RPL21	AT1	2.51375e-14	0.390737	0.859	0.835	4.6605e-10	L-TB vs. Ctrl	Up-Up
RPL21	AT1	3.44594e-11	0.348982	0.859	0.853	6.38878e-07	L-TB vs. AL-TB	Up-Up
RPL22	AT1	5.75061e-32	0.534659	0.801	0.737	1.06616e-27	L-TB vs. Ctrl	Up-Up
RPL22	AT1	4.11305e-10	0.304582	0.801	0.751	7.62559e-06	L-TB vs. AL-TB	Up-Up
RPL22L1	AT1	1.50632e-10	0.327202	0.29	0.208	2.79271e-06	L-TB vs. Ctrl	Up-Up
RPL23	AT1	9.35442e-17	-0.43938	0.631	0.726	1.73431e-12	AL-TB vs. Ctrl	Other
RPL23	AT1	2.77212e-09	0.425529	0.691	0.631	5.1395e-05	L-TB vs. AL-TB	Other
RPL23A	AT1	4.24295e-07	0.3052	0.736	0.694	0.00786643	L-TB vs. AL-TB	Other
RPL23A	AT1	4.46942e-09	0.416501	0.736	0.731	8.28631e-05	L-TB vs. Ctrl	Other
RPL24	AT1	5.12934e-10	0.251823	0.865	0.822	9.50979e-06	L-TB vs. AL-TB	Up-Up
RPL24	AT1	1.56123e-23	0.405151	0.865	0.817	2.89453e-19	L-TB vs. Ctrl	Up-Up
RPL26	AT1	2.45433e-06	0.32285	0.805	0.811	0.0455032	AL-TB vs. Ctrl	Other
RPL26	AT1	5.53156e-18	0.525996	0.82	0.811	1.02555e-13	L-TB vs. Ctrl	Other
RPL27A	AT1	2.9059e-16	-0.29598	0.692	0.802	5.38753e-12	AL-TB vs. Ctrl	Down-Down
RPL27A	AT1	1.95642e-07	0.305133	0.749	0.692	0.0036272	L-TB vs. AL-TB	Down-Down
RPL28	AT1	5.40307e-14	0.295152	0.931	0.888	1.00173e-09	L-TB vs. AL-TB	Up-Up
RPL28	AT1	1.29811e-07	0.424458	0.888	0.879	0.0024067	AL-TB vs. Ctrl	Up-Up
RPL28	AT1	1.54543e-46	0.71961	0.931	0.879	2.86523e-42	L-TB vs. Ctrl	Up-Up
RPL29	AT1	1.11909e-31	0.526905	0.846	0.788	2.07479e-27	L-TB vs. Ctrl	Up-Up
RPL29	AT1	5.06134e-13	0.306608	0.846	0.775	9.38372e-09	L-TB vs. AL-TB	Up-Up
RPL3	AT1	1.19869e-11	0.560075	0.784	0.789	2.22236e-07	L-TB vs. Ctrl	Other
RPL30	AT1	4.01622e-68	0.840867	0.912	0.842	7.44607e-64	L-TB vs. Ctrl	Up-Up
RPL30	AT1	1.80311e-13	0.313114	0.912	0.865	3.34296e-09	L-TB vs. AL-TB	Up-Up
RPL30	AT1	3.67507e-19	0.527753	0.865	0.842	6.81357e-15	AL-TB vs. Ctrl	Up-Up
RPL31	AT1	1.20142e-13	-0.379555	0.469	0.589	2.22743e-09	AL-TB vs. Ctrl	Other
RPL31	AT1	1.24606e-10	0.392338	0.555	0.469	2.3102e-06	L-TB vs. AL-TB	Other
RPL32	AT1	8.70917e-09	0.418995	0.832	0.833	0.000161468	AL-TB vs. Ctrl	Up-Up
RPL32	AT1	1.05653e-51	0.786337	0.911	0.833	1.95881e-47	L-TB vs. Ctrl	Up-Up
RPL32	AT1	2.3971e-15	0.367342	0.911	0.832	4.44422e-11	L-TB vs. AL-TB	Up-Up
RPL34	AT1	2.41401e-49	0.869583	0.898	0.838	4.47558e-45	L-TB vs. Ctrl	Up-Up
RPL34	AT1	3.36193e-14	0.426493	0.898	0.867	6.23302e-10	L-TB vs. AL-TB	Up-Up
RPL34	AT1	2.39299e-10	0.443089	0.867	0.838	4.4366e-06	AL-TB vs. Ctrl	Up-Up
RPL35A	AT1	4.05613e-13	0.40327	0.81	0.775	7.52006e-09	AL-TB vs. Ctrl	Up-Up
RPL35A	AT1	7.61601e-45	0.683993	0.847	0.775	1.41201e-40	L-TB vs. Ctrl	Up-Up
RPL35A	AT1	2.54019e-09	0.280723	0.847	0.81	4.70952e-05	L-TB vs. AL-TB	Up-Up
RPL36	AT1	8.46826e-08	0.310601	0.792	0.757	0.00157002	L-TB vs. AL-TB	Other
RPL36	AT1	3.46598e-10	0.402	0.792	0.786	6.42593e-06	L-TB vs. Ctrl	Other
RPL36A	AT1	8.09854e-26	0.604754	0.594	0.502	1.50147e-21	L-TB vs. Ctrl	Other
RPL36A	AT1	3.54192e-12	0.381629	0.594	0.497	6.56672e-08	L-TB vs. AL-TB	Other
RPL37	AT1	8.02168e-13	0.354881	0.869	0.829	1.48722e-08	L-TB vs. AL-TB	Up-Up
RPL37	AT1	2.65395e-22	0.496676	0.869	0.839	4.92042e-18	L-TB vs. Ctrl	Up-Up
RPL37A	AT1	8.71445e-09	-0.26164	0.748	0.81	0.000161566	AL-TB vs. Ctrl	Other
RPL37A	AT1	1.51505e-12	0.457294	0.801	0.748	2.8089e-08	L-TB vs. AL-TB	Other
RPL38	AT1	1.28714e-15	0.450755	0.688	0.615	2.38636e-11	L-TB vs. AL-TB	Other
RPL39	AT1	7.44958e-18	0.398477	0.919	0.869	1.38115e-13	L-TB vs. AL-TB	Up-Up
RPL39	AT1	1.51963e-91	1.03873	0.919	0.84	2.8174e-87	L-TB vs. Ctrl	Up-Up
RPL39	AT1	4.50114e-25	0.640257	0.869	0.84	8.34511e-21	AL-TB vs. Ctrl	Up-Up
RPL41	AT1	2.35986e-57	0.6964	0.975	0.949	4.37519e-53	L-TB vs. Ctrl	Up-Up
RPL41	AT1	2.25457e-17	0.355909	0.975	0.958	4.17998e-13	L-TB vs. AL-TB	Up-Up
RPL41	AT1	6.31366e-10	0.340491	0.958	0.949	1.17055e-05	AL-TB vs. Ctrl	Up-Up
RPL5	AT1	1.89154e-27	0.539304	0.811	0.761	3.50691e-23	L-TB vs. Ctrl	Up-Up
RPL5	AT1	6.38933e-09	0.300448	0.811	0.762	0.000118458	L-TB vs. AL-TB	Up-Up
RPL6	AT1	2.73811e-32	0.597777	0.808	0.748	5.07646e-28	L-TB vs. Ctrl	Up-Up
RPL6	AT1	2.79886e-10	0.278901	0.808	0.738	5.18909e-06	L-TB vs. AL-TB	Up-Up
RPL7	AT1	2.45491e-10	0.410853	0.666	0.604	4.5514e-06	L-TB vs. AL-TB	Up-Up
RPL7A	AT1	1.47481e-13	0.358214	0.824	0.797	2.73429e-09	AL-TB vs. Ctrl	Other
RPL7A	AT1	2.44976e-34	0.563816	0.853	0.797	4.54186e-30	L-TB vs. Ctrl	Other
RPL8	AT1	1.07295e-15	0.340423	0.886	0.869	1.98925e-11	L-TB vs. Ctrl	Up-Up
RPL9	AT1	2.72748e-10	0.316274	0.875	0.815	5.05676e-06	L-TB vs. AL-TB	Other
RPL9	AT1	1.25944e-19	0.428295	0.875	0.836	2.335e-15	L-TB vs. Ctrl	Other
RPLP1	AT1	2.71698e-33	0.730851	0.967	0.919	5.03729e-29	L-TB vs. Ctrl	Up-Up
RPLP1	AT1	3.48891e-15	0.460101	0.967	0.951	6.46844e-11	L-TB vs. AL-TB	Up-Up
RPLP2	AT1	3.32444e-19	0.404615	0.863	0.803	6.1635e-15	L-TB vs. AL-TB	Up-Up
RPLP2	AT1	1.45615e-12	0.314528	0.863	0.814	2.6997e-08	L-TB vs. Ctrl	Up-Up
RPN1	AT1	4.9816e-12	-0.272538	0.343	0.456	9.23589e-08	L-TB vs. Ctrl	Down-Down
RPN2	AT1	2.49838e-20	-0.378797	0.335	0.483	4.632e-16	L-TB vs. Ctrl	Down-Down
RPN2	AT1	1.07124e-12	-0.332621	0.365	0.483	1.98608e-08	AL-TB vs. Ctrl	Down-Down
RPS10	AT1	1.00207e-60	0.920724	0.773	0.654	1.85785e-56	L-TB vs. Ctrl	Up-Up
RPS10	AT1	1.35254e-24	0.592156	0.731	0.654	2.50761e-20	AL-TB vs. Ctrl	Up-Up
RPS10	AT1	7.91686e-09	0.328567	0.773	0.731	0.000146779	L-TB vs. AL-TB	Up-Up
RPS11	AT1	7.30718e-07	-0.267959	0.685	0.758	0.0135475	AL-TB vs. Ctrl	Other
RPS11	AT1	2.2276e-08	0.364856	0.746	0.685	0.000412997	L-TB vs. AL-TB	Other
RPS12	AT1	1.07009e-38	0.654035	0.93	0.886	1.98394e-34	L-TB vs. Ctrl	Up-Up
RPS12	AT1	1.09664e-12	0.307916	0.93	0.892	2.03317e-08	L-TB vs. AL-TB	Up-Up
RPS12	AT1	1.79258e-06	0.346119	0.892	0.886	0.0332344	AL-TB vs. Ctrl	Up-Up
RPS13	AT1	5.91854e-18	0.42729	0.834	0.798	1.0973e-13	AL-TB vs. Ctrl	Up-Up
RPS13	AT1	4.44528e-64	0.665521	0.891	0.798	8.24155e-60	L-TB vs. Ctrl	Up-Up
RPS14	AT1	7.31877e-11	0.299825	0.919	0.881	1.3569e-06	L-TB vs. AL-TB	Up-Up
RPS14	AT1	5.60617e-28	0.559289	0.919	0.869	1.03938e-23	L-TB vs. Ctrl	Up-Up
RPS15	AT1	3.73099e-27	0.521094	0.871	0.823	6.91726e-23	L-TB vs. Ctrl	Up-Up
RPS15	AT1	5.29327e-10	0.26723	0.871	0.812	9.81373e-06	L-TB vs. AL-TB	Up-Up
RPS15A	AT1	9.44753e-10	0.269526	0.896	0.844	1.75157e-05	L-TB vs. AL-TB	Up-Up
RPS15A	AT1	1.37212e-62	0.836724	0.896	0.803	2.5439e-58	L-TB vs. Ctrl	Up-Up
RPS15A	AT1	6.38168e-21	0.567198	0.844	0.803	1.18316e-16	AL-TB vs. Ctrl	Up-Up
RPS16	AT1	1.01638e-07	0.285109	0.819	0.774	0.00188436	L-TB vs. AL-TB	Up-Up
RPS16	AT1	2.29672e-09	0.29508	0.819	0.785	4.25813e-05	L-TB vs. Ctrl	Up-Up
RPS2	AT1	5.4467e-08	0.277684	0.839	0.771	0.00100982	L-TB vs. AL-TB	Up-Up
RPS2	AT1	2.30339e-26	0.544394	0.839	0.776	4.27048e-22	L-TB vs. Ctrl	Up-Up
RPS20	AT1	7.74917e-13	0.417451	0.711	0.649	1.4367e-08	L-TB vs. AL-TB	Down-Down
RPS20	AT1	5.07395e-25	-0.575442	0.649	0.742	9.4071e-21	AL-TB vs. Ctrl	Down-Down
RPS21	AT1	2.47643e-23	0.543038	0.787	0.754	4.59131e-19	L-TB vs. Ctrl	Up-Up
RPS21	AT1	4.75799e-14	0.374314	0.787	0.724	8.82132e-10	L-TB vs. AL-TB	Up-Up
RPS23	AT1	2.9233e-31	0.609113	0.88	0.842	5.41981e-27	L-TB vs. Ctrl	Up-Up
RPS23	AT1	7.35394e-08	0.367798	0.838	0.842	0.00136342	AL-TB vs. Ctrl	Up-Up
RPS24	AT1	2.18995e-35	0.632472	0.879	0.83	4.06016e-31	L-TB vs. Ctrl	Up-Up
RPS24	AT1	4.99172e-12	0.341804	0.879	0.819	9.25465e-08	L-TB vs. AL-TB	Up-Up
RPS25	AT1	8.5276e-07	0.315211	0.776	0.771	0.0158102	AL-TB vs. Ctrl	Other
RPS25	AT1	8.79914e-27	0.607428	0.816	0.771	1.63136e-22	L-TB vs. Ctrl	Other
RPS25	AT1	1.40854e-07	0.292217	0.816	0.776	0.00261144	L-TB vs. AL-TB	Other
RPS26	AT1	3.53769e-07	0.322911	0.746	0.723	0.00655888	AL-TB vs. Ctrl	Up-Up
RPS27	AT1	2.20389e-15	0.398526	0.929	0.872	4.08601e-11	L-TB vs. AL-TB	Up-Up
RPS27	AT1	1.79025e-24	0.593067	0.929	0.901	3.31913e-20	L-TB vs. Ctrl	Up-Up
RPS27A	AT1	3.69375e-11	0.283898	0.922	0.885	6.8482e-07	L-TB vs. AL-TB	Up-Up
RPS27A	AT1	1.82545e-17	0.514148	0.885	0.856	3.38439e-13	AL-TB vs. Ctrl	Up-Up
RPS27A	AT1	2.99013e-60	0.798046	0.922	0.856	5.54371e-56	L-TB vs. Ctrl	Up-Up
RPS28	AT1	1.70294e-35	0.615249	0.924	0.888	3.15725e-31	L-TB vs. Ctrl	Up-Up
RPS28	AT1	1.97315e-10	0.297216	0.924	0.892	3.65822e-06	L-TB vs. AL-TB	Up-Up
RPS28	AT1	3.28357e-07	0.318033	0.892	0.888	0.00608773	AL-TB vs. Ctrl	Up-Up
RPS29	AT1	4.29051e-14	0.503538	0.8	0.774	7.95461e-10	L-TB vs. Ctrl	Up-Up
RPS29	AT1	1.86554e-17	0.468533	0.8	0.713	3.45871e-13	L-TB vs. AL-TB	Up-Up
RPS3	AT1	2.38241e-36	0.609814	0.879	0.829	4.41699e-32	L-TB vs. Ctrl	Up-Up
RPS3	AT1	9.99395e-09	0.361508	0.831	0.829	0.000185288	AL-TB vs. Ctrl	Up-Up
RPS3A	AT1	2.54148e-45	0.817153	0.854	0.784	4.7119e-41	L-TB vs. Ctrl	Up-Up
RPS3A	AT1	1.02729e-21	0.585228	0.827	0.784	1.90459e-17	AL-TB vs. Ctrl	Up-Up
RPS4X	AT1	1.33201e-54	0.904419	0.845	0.771	2.46954e-50	L-TB vs. Ctrl	Up-Up
RPS4X	AT1	3.67364e-12	0.381951	0.845	0.783	6.81092e-08	L-TB vs. AL-TB	Up-Up
RPS4X	AT1	1.1883e-14	0.522468	0.783	0.771	2.2031e-10	AL-TB vs. Ctrl	Up-Up
RPS4Y1	AT1	8.43673e-09	0.328419	0.407	0.337	0.000156417	L-TB vs. Ctrl	Up-Up
RPS5	AT1	5.01129e-15	0.517793	0.724	0.688	9.29094e-11	L-TB vs. Ctrl	Up-Up
RPS6	AT1	9.20714e-07	0.361189	0.8	0.742	0.01707	L-TB vs. AL-TB	Other
RPS6	AT1	1.03601e-15	0.586763	0.8	0.768	1.92077e-11	L-TB vs. Ctrl	Other
RPS6KA2	AT1	3.92543e-42	-0.600894	0.108	0.304	7.27776e-38	AL-TB vs. Ctrl	Down-Down
RPS6KA2	AT1	9.35211e-59	-0.618291	0.091	0.304	1.73388e-54	L-TB vs. Ctrl	Down-Down
RPS7	AT1	2.41025e-13	0.369178	0.825	0.806	4.4686e-09	AL-TB vs. Ctrl	Up-Up
RPS7	AT1	1.93565e-31	0.528198	0.857	0.806	3.58869e-27	L-TB vs. Ctrl	Up-Up
RPS8	AT1	2.63458e-27	0.680242	0.898	0.854	4.88451e-23	L-TB vs. Ctrl	Up-Up
RPS8	AT1	5.44349e-10	0.352203	0.898	0.857	1.00922e-05	L-TB vs. AL-TB	Up-Up
RPSA	AT1	7.33519e-12	0.363594	0.708	0.691	1.35994e-07	L-TB vs. Ctrl	Other
RRAD	AT1	4.84969e-17	1.06968	0.208	0.112	8.99132e-13	L-TB vs. Ctrl	Up-Up
RRAD	AT1	7.22334e-19	-0.724393	0.208	0.338	1.33921e-14	L-TB vs. AL-TB	Up-Up
RRAD	AT1	2.40981e-61	1.79407	0.338	0.112	4.46779e-57	AL-TB vs. Ctrl	Up-Up
RRBP1	AT1	5.04317e-29	-0.48877	0.336	0.507	9.35003e-25	L-TB vs. Ctrl	Down-Down
RRBP1	AT1	4.57978e-16	-0.414349	0.378	0.507	8.4909e-12	AL-TB vs. Ctrl	Down-Down
RREB1	AT1	4.5321e-23	-0.390837	0.13	0.275	8.40251e-19	AL-TB vs. Ctrl	Down-Down
RREB1	AT1	1.1917e-22	-0.380412	0.144	0.275	2.20942e-18	L-TB vs. Ctrl	Down-Down
RRM2B	AT1	3.61133e-16	-0.375872	0.138	0.254	6.69541e-12	AL-TB vs. Ctrl	Other
RRM2B	AT1	4.48956e-20	-0.330827	0.134	0.254	8.32364e-16	L-TB vs. Ctrl	Other
RSL24D1	AT1	1.75909e-08	0.281368	0.394	0.31	0.000326136	L-TB vs. AL-TB	Other
RTKN2	AT1	2.23665e-33	0.354543	0.839	0.689	4.14675e-29	L-TB vs. Ctrl	Up-Up
RUFY3	AT1	5.67186e-13	-0.267214	0.2	0.308	1.05156e-08	L-TB vs. Ctrl	Down-Down
RUNX1	AT1	9.61314e-07	0.438424	0.386	0.33	0.0178228	AL-TB vs. Ctrl	Up-Up
RUNX1	AT1	1.95028e-06	-0.360362	0.321	0.386	0.0361582	L-TB vs. AL-TB	Up-Up
RUNX3	AT1	6.48379e-23	0.374804	0.169	0.064	1.20209e-18	L-TB vs. Ctrl	Up-Up
RUNX3	AT1	3.33285e-16	0.366588	0.151	0.064	6.17911e-12	AL-TB vs. Ctrl	Up-Up
S100A10	AT1	2.85888e-54	0.590823	0.985	0.952	5.30036e-50	AL-TB vs. Ctrl	Up-Up
S100A10	AT1	1.92949e-20	-0.35673	0.976	0.985	3.57728e-16	L-TB vs. AL-TB	Up-Up
S100A14	AT1	3.16812e-07	0.311948	0.284	0.212	0.00587369	AL-TB vs. Ctrl	Up-Up
S100A14	AT1	2.51312e-06	0.276397	0.275	0.212	0.0465933	L-TB vs. Ctrl	Up-Up
S100A16	AT1	4.28594e-08	-0.330364	0.25	0.326	0.000794613	L-TB vs. AL-TB	Other
S100A4	AT1	2.66887e-07	-0.438482	0.771	0.785	0.00494809	L-TB vs. Ctrl	Other
S100A8	AT1	1.30672e-10	0.72729	0.215	0.129	2.42266e-06	L-TB vs. AL-TB	Down-Down
S100A8	AT1	4.79405e-26	-0.805303	0.215	0.386	8.88817e-22	L-TB vs. Ctrl	Down-Down
S100A8	AT1	1.67272e-56	-1.53259	0.129	0.386	3.10122e-52	AL-TB vs. Ctrl	Down-Down
S100A9	AT1	6.25567e-49	-1.43697	0.303	0.521	1.1598e-44	L-TB vs. Ctrl	Down-Down
S100A9	AT1	2.67533e-06	0.265841	0.303	0.229	0.0496007	L-TB vs. AL-TB	Down-Down
S100A9	AT1	2.73423e-68	-1.70281	0.229	0.521	5.06926e-64	AL-TB vs. Ctrl	Down-Down
SACM1L	AT1	2.41672e-12	-0.295465	0.185	0.292	4.48061e-08	AL-TB vs. Ctrl	Down-Down
SAMSN1	AT1	3.08614e-15	0.457065	0.247	0.147	5.7217e-11	L-TB vs. Ctrl	Up-Up
SARS	AT1	9.53347e-09	-0.251268	0.238	0.331	0.000176751	AL-TB vs. Ctrl	Down-Down
SARS	AT1	1.60098e-14	-0.315401	0.219	0.331	2.96822e-10	L-TB vs. Ctrl	Down-Down
SC5D	AT1	3.84337e-11	-0.28327	0.195	0.296	7.12561e-07	AL-TB vs. Ctrl	Down-Down
SCAMP2	AT1	4.18563e-22	-0.43765	0.353	0.52	7.76017e-18	AL-TB vs. Ctrl	Down-Down
SCAMP2	AT1	1.34346e-26	-0.402698	0.341	0.52	2.49078e-22	L-TB vs. Ctrl	Down-Down
SCD	AT1	1.32051e-11	-0.306469	0.058	0.128	2.44823e-07	AL-TB vs. Ctrl	Down-Down
SCD	AT1	2.61344e-21	-0.371663	0.042	0.128	4.84532e-17	L-TB vs. Ctrl	Down-Down
SCEL	AT1	4.58058e-25	-0.381406	0.646	0.789	8.49239e-21	AL-TB vs. Ctrl	Down-Down
SCEL	AT1	2.92647e-42	-0.537364	0.625	0.789	5.42567e-38	L-TB vs. Ctrl	Down-Down
SCGB3A1	AT1	7.1548e-17	0.399011	0.67	0.603	1.3265e-12	L-TB vs. AL-TB	Other
SCN9A	AT1	1.55109e-12	-0.296399	0.073	0.146	2.87573e-08	L-TB vs. Ctrl	Down-Down
SCNN1A	AT1	5.95054e-24	-0.460874	0.44	0.604	1.10323e-19	AL-TB vs. Ctrl	Down-Down
SCNN1A	AT1	2.06235e-26	-0.451566	0.451	0.604	3.8236e-22	L-TB vs. Ctrl	Down-Down
SCPEP1	AT1	2.76485e-12	-0.260072	0.176	0.284	5.12603e-08	AL-TB vs. Ctrl	Down-Down
SDC1	AT1	4.43394e-11	-0.287373	0.501	0.603	8.22052e-07	L-TB vs. Ctrl	Other
SDC4	AT1	7.49433e-12	-0.53747	0.623	0.704	1.38945e-07	L-TB vs. Ctrl	Down-Down
SDC4	AT1	6.35134e-29	-0.685518	0.623	0.743	1.17754e-24	L-TB vs. AL-TB	Down-Down
SDCBP	AT1	1.76033e-43	0.650335	0.729	0.601	3.26365e-39	L-TB vs. Ctrl	Up-Up
SDCBP	AT1	2.81565e-42	0.678597	0.73	0.601	5.22022e-38	AL-TB vs. Ctrl	Up-Up
SDPR	AT1	1.55477e-17	-0.391257	0.466	0.609	2.88255e-13	AL-TB vs. Ctrl	Down-Down
SDPR	AT1	5.119e-13	-0.2857	0.498	0.609	9.49063e-09	L-TB vs. Ctrl	Down-Down
SDR16C5	AT1	5.3506e-54	-0.915138	0.123	0.351	9.92002e-50	AL-TB vs. Ctrl	Down-Down
SDR16C5	AT1	1.43031e-75	-0.959156	0.107	0.351	2.65179e-71	L-TB vs. Ctrl	Down-Down
SEC11A	AT1	2.10354e-10	-0.268317	0.415	0.511	3.89995e-06	L-TB vs. Ctrl	Down-Down
SEC31A	AT1	6.9579e-14	-0.288253	0.392	0.511	1.28999e-09	L-TB vs. Ctrl	Down-Down
SEC61A1	AT1	1.55262e-12	-0.34719	0.219	0.33	2.87856e-08	AL-TB vs. Ctrl	Down-Down
SEC61A1	AT1	1.78853e-24	-0.420563	0.183	0.33	3.31594e-20	L-TB vs. Ctrl	Down-Down
SEC63	AT1	3.54712e-13	-0.278543	0.279	0.392	6.57636e-09	L-TB vs. Ctrl	Down-Down
SEC63	AT1	1.38667e-10	-0.286732	0.282	0.392	2.57089e-06	AL-TB vs. Ctrl	Down-Down
SELK	AT1	2.05446e-09	0.339547	0.497	0.435	3.80896e-05	AL-TB vs. Ctrl	Up-Up
SELK	AT1	1.3125e-18	0.457674	0.524	0.435	2.43337e-14	L-TB vs. Ctrl	Up-Up
SEMA4A	AT1	3.34029e-25	0.582061	0.187	0.069	6.1929e-21	AL-TB vs. Ctrl	Up-Up
SEMA4A	AT1	2.21596e-25	0.48789	0.182	0.069	4.10839e-21	L-TB vs. Ctrl	Up-Up
SEMA4B	AT1	1.17126e-10	-0.254205	0.092	0.162	2.17152e-06	L-TB vs. Ctrl	Down-Down
SEPTIN10	AT1	2.55264e-12	-0.300485	0.299	0.422	4.7326e-08	AL-TB vs. Ctrl	Other
SEPTIN10	AT1	1.13743e-12	-0.285197	0.307	0.422	2.1088e-08	L-TB vs. Ctrl	Other
SEPTIN6	AT1	1.83843e-13	0.287086	0.132	0.061	3.40845e-09	L-TB vs. Ctrl	Up-Up
SEPW1	AT1	3.65927e-22	0.431404	0.754	0.66	6.78429e-18	AL-TB vs. Ctrl	Up-Up
SEPW1	AT1	6.75541e-10	0.296671	0.726	0.66	1.25245e-05	L-TB vs. Ctrl	Up-Up
SERBP1	AT1	7.42264e-11	-0.261482	0.42	0.539	1.37616e-06	AL-TB vs. Ctrl	Other
SERF2	AT1	1.24715e-20	0.36424	0.865	0.818	2.31222e-16	AL-TB vs. Ctrl	Up-Up
SERF2	AT1	9.21976e-21	0.303025	0.882	0.818	1.70934e-16	L-TB vs. Ctrl	Up-Up
SERINC1	AT1	2.74375e-14	-0.320904	0.552	0.658	5.08692e-10	AL-TB vs. Ctrl	Down-Down
SERINC1	AT1	1.33089e-27	-0.46022	0.528	0.658	2.46746e-23	L-TB vs. Ctrl	Down-Down
SERINC2	AT1	1.59168e-12	-0.265661	0.165	0.262	2.95097e-08	L-TB vs. Ctrl	Down-Down
SERINC3	AT1	1.19074e-08	-0.251566	0.333	0.435	0.000220764	AL-TB vs. Ctrl	Down-Down
SERPINA1	AT1	6.22738e-10	-0.528732	0.169	0.249	1.15456e-05	L-TB vs. Ctrl	Down-Down
SERPINA1	AT1	8.61501e-10	-0.632995	0.169	0.249	1.59722e-05	L-TB vs. AL-TB	Down-Down
SERPINB1	AT1	4.04828e-37	-0.820609	0.419	0.581	7.50551e-33	L-TB vs. Ctrl	Down-Down
SERPINB1	AT1	1.92952e-15	-0.627018	0.419	0.514	3.57733e-11	L-TB vs. AL-TB	Down-Down
SERPINH1	AT1	1.64877e-14	0.653087	0.415	0.316	3.05682e-10	AL-TB vs. Ctrl	Up-Up
SERPINH1	AT1	7.41316e-07	0.446171	0.367	0.316	0.013744	L-TB vs. Ctrl	Up-Up
SERTAD1	AT1	2.62942e-54	0.804634	0.487	0.241	4.87495e-50	AL-TB vs. Ctrl	Up-Up
SERTAD1	AT1	4.28792e-69	0.853816	0.503	0.241	7.9498e-65	L-TB vs. Ctrl	Up-Up
SERTAD3	AT1	2.26889e-25	0.471268	0.28	0.136	4.20652e-21	AL-TB vs. Ctrl	Up-Up
SERTAD3	AT1	1.88516e-28	0.452735	0.28	0.136	3.49509e-24	L-TB vs. Ctrl	Up-Up
SESN3	AT1	1.89805e-14	-0.295428	0.119	0.223	3.51898e-10	AL-TB vs. Ctrl	Down-Down
SESTD1	AT1	1.09956e-16	-0.347491	0.482	0.612	2.03858e-12	L-TB vs. Ctrl	Down-Down
SESTD1	AT1	3.42012e-13	-0.306749	0.484	0.612	6.34091e-09	AL-TB vs. Ctrl	Down-Down
SETD3	AT1	4.19708e-10	-0.25944	0.138	0.223	7.78139e-06	AL-TB vs. Ctrl	Down-Down
SETX	AT1	1.24967e-10	-0.305455	0.299	0.407	2.31689e-06	AL-TB vs. Ctrl	Down-Down
SF1	AT1	5.57696e-26	0.481117	0.659	0.55	1.03397e-21	L-TB vs. Ctrl	Up-Up
SF1	AT1	9.30986e-16	0.441313	0.638	0.55	1.72605e-11	AL-TB vs. Ctrl	Up-Up
SFN	AT1	3.09139e-13	-0.837785	0.19	0.286	5.73143e-09	L-TB vs. AL-TB	Down-Down
SFN	AT1	2.34111e-25	-0.557823	0.19	0.34	4.34042e-21	L-TB vs. Ctrl	Down-Down
SFTA2	AT1	1.73877e-29	-0.602179	0.701	0.787	3.22367e-25	AL-TB vs. Ctrl	Other
SFTA2	AT1	7.48893e-31	-0.534025	0.678	0.787	1.38845e-26	L-TB vs. Ctrl	Other
SFTPB	AT1	1.56126e-108	-2.41794	0.43	0.735	2.89457e-104	AL-TB vs. Ctrl	Down-Down
SFTPB	AT1	2.82465e-137	-2.64054	0.443	0.735	5.2369e-133	L-TB vs. Ctrl	Down-Down
SFTPC	AT1	1.0333e-58	0.848668	0.78	0.554	1.91573e-54	L-TB vs. AL-TB	Up-Up
SFTPC	AT1	4.16597e-90	-0.666735	0.78	0.522	7.72371e-86	L-TB vs. Ctrl	Up-Up
SFTPD	AT1	3.72226e-11	-0.4004	0.356	0.463	6.90107e-07	AL-TB vs. Ctrl	Down-Down
SFTPD	AT1	1.1734e-26	-0.666229	0.307	0.463	2.17549e-22	L-TB vs. Ctrl	Down-Down
SGK1	AT1	4.57454e-11	0.259101	0.153	0.084	8.4812e-07	L-TB vs. Ctrl	Other
SGMS1	AT1	2.81075e-25	-0.416388	0.239	0.403	5.21114e-21	L-TB vs. Ctrl	Down-Down
SGMS1	AT1	1.44989e-17	-0.370558	0.26	0.403	2.68809e-13	AL-TB vs. Ctrl	Down-Down
SGMS2	AT1	6.03742e-08	-0.430894	0.33	0.398	0.00111934	L-TB vs. AL-TB	Other
SH2D2A	AT1	4.02595e-17	0.25255	0.102	0.032	7.46411e-13	L-TB vs. Ctrl	Up-Up
SH2D3A	AT1	1.7244e-23	-0.397121	0.164	0.305	3.19703e-19	L-TB vs. Ctrl	Down-Down
SH2D4A	AT1	4.32612e-20	-0.35415	0.236	0.381	8.02063e-16	L-TB vs. Ctrl	Down-Down
SH2D4A	AT1	3.8318e-19	-0.355553	0.231	0.381	7.10415e-15	AL-TB vs. Ctrl	Down-Down
SH3BGRL3	AT1	1.74204e-18	0.360965	0.563	0.448	3.22974e-14	L-TB vs. Ctrl	Up-Up
SH3BGRL3	AT1	6.35223e-14	0.461578	0.532	0.448	1.1777e-09	AL-TB vs. Ctrl	Up-Up
SH3D19	AT1	1.0504e-27	-0.353439	0.075	0.2	1.94744e-23	L-TB vs. Ctrl	Down-Down
SH3D19	AT1	8.24241e-16	-0.282245	0.097	0.2	1.52814e-11	AL-TB vs. Ctrl	Down-Down
SH3GLB1	AT1	1.81392e-15	-0.374306	0.344	0.475	3.363e-11	AL-TB vs. Ctrl	Down-Down
SH3GLB1	AT1	8.78675e-15	-0.319811	0.356	0.475	1.62906e-10	L-TB vs. Ctrl	Down-Down
SH3RF1	AT1	2.24212e-07	0.296203	0.372	0.308	0.00415689	AL-TB vs. Ctrl	Up-Up
SH3RF2	AT1	5.18721e-12	-0.251437	0.087	0.161	9.61709e-08	L-TB vs. Ctrl	Down-Down
SHPRH	AT1	2.41492e-15	-0.340524	0.136	0.247	4.47726e-11	AL-TB vs. Ctrl	Down-Down
SIPA1L1	AT1	7.36888e-09	-0.292306	0.192	0.279	0.000136619	AL-TB vs. Ctrl	Down-Down
SIPA1L1	AT1	8.73163e-11	-0.280559	0.19	0.279	1.61884e-06	L-TB vs. Ctrl	Down-Down
SKIL	AT1	4.23235e-10	0.324507	0.473	0.405	7.84678e-06	L-TB vs. Ctrl	Up-Up
SKIL	AT1	1.03512e-18	0.621489	0.499	0.405	1.91912e-14	AL-TB vs. Ctrl	Up-Up
SKP1	AT1	3.54152e-10	0.282542	0.692	0.637	6.56597e-06	AL-TB vs. Ctrl	Up-Up
SKP1	AT1	1.37492e-23	0.401377	0.717	0.637	2.54911e-19	L-TB vs. Ctrl	Up-Up
SLA	AT1	3.57317e-09	0.277589	0.174	0.109	6.62466e-05	L-TB vs. Ctrl	Up-Up
SLC11A1	AT1	3.99717e-15	-0.309806	0.051	0.125	7.41076e-11	L-TB vs. Ctrl	Down-Down
SLC11A1	AT1	1.96055e-08	-0.252719	0.065	0.125	0.000363486	AL-TB vs. Ctrl	Down-Down
SLC11A2	AT1	2.82397e-14	-0.437069	0.188	0.302	5.23563e-10	AL-TB vs. Ctrl	Down-Down
SLC11A2	AT1	8.79661e-21	-0.477088	0.173	0.302	1.63089e-16	L-TB vs. Ctrl	Down-Down
SLC12A7	AT1	1.15706e-11	-0.261412	0.098	0.175	2.14519e-07	L-TB vs. Ctrl	Down-Down
SLC15A2	AT1	7.65744e-13	-0.260247	0.277	0.39	1.41969e-08	L-TB vs. Ctrl	Down-Down
SLC16A5	AT1	2.64377e-22	-0.361974	0.138	0.268	4.90154e-18	L-TB vs. Ctrl	Down-Down
SLC1A1	AT1	5.51219e-21	-0.529574	0.417	0.554	1.02196e-16	AL-TB vs. Ctrl	Other
SLC1A1	AT1	1.33967e-15	-0.452073	0.451	0.554	2.48375e-11	L-TB vs. Ctrl	Other
SLC20A1	AT1	1.50465e-08	0.33972	0.23	0.165	0.000278961	L-TB vs. Ctrl	Other
SLC25A16	AT1	1.50322e-18	-0.323164	0.147	0.278	2.78697e-14	AL-TB vs. Ctrl	Down-Down
SLC25A16	AT1	2.63201e-26	-0.350146	0.132	0.278	4.87975e-22	L-TB vs. Ctrl	Down-Down
SLC25A24	AT1	1.10566e-23	-0.409719	0.228	0.397	2.04989e-19	AL-TB vs. Ctrl	Down-Down
SLC25A24	AT1	3.71306e-19	-0.342404	0.254	0.397	6.88401e-15	L-TB vs. Ctrl	Down-Down
SLC25A25	AT1	3.17047e-07	0.277334	0.135	0.082	0.00587805	AL-TB vs. Ctrl	Up-Up
SLC30A1	AT1	2.59717e-29	0.505569	0.183	0.058	4.81516e-25	AL-TB vs. Ctrl	Up-Up
SLC30A1	AT1	3.33344e-24	0.370704	0.163	0.058	6.1802e-20	L-TB vs. Ctrl	Up-Up
SLC30A7	AT1	6.8252e-13	-0.265988	0.149	0.25	1.26539e-08	AL-TB vs. Ctrl	Down-Down
SLC33A1	AT1	3.99251e-17	-0.263633	0.114	0.219	7.40211e-13	L-TB vs. Ctrl	Down-Down
SLC34A2	AT1	2.25567e-60	-1.44273	0.613	0.75	4.18201e-56	AL-TB vs. Ctrl	Down-Down
SLC34A2	AT1	8.45701e-83	-1.50283	0.572	0.75	1.56793e-78	L-TB vs. Ctrl	Down-Down
SLC35A3	AT1	3.31781e-22	-0.396296	0.23	0.391	6.15122e-18	AL-TB vs. Ctrl	Down-Down
SLC35A3	AT1	1.02166e-32	-0.477325	0.209	0.391	1.89415e-28	L-TB vs. Ctrl	Down-Down
SLC35F5	AT1	1.81254e-12	-0.257599	0.127	0.216	3.36046e-08	L-TB vs. Ctrl	Down-Down
SLC36A4	AT1	2.61153e-15	-0.263308	0.09	0.181	4.84178e-11	L-TB vs. Ctrl	Down-Down
SLC36A4	AT1	2.23956e-12	-0.276647	0.094	0.181	4.15214e-08	AL-TB vs. Ctrl	Down-Down
SLC38A1	AT1	1.32216e-16	-0.344935	0.276	0.405	2.45128e-12	L-TB vs. Ctrl	Down-Down
SLC38A1	AT1	6.71568e-17	-0.387761	0.267	0.405	1.24509e-12	AL-TB vs. Ctrl	Down-Down
SLC38A2	AT1	2.05223e-11	0.446524	0.572	0.503	3.80483e-07	L-TB vs. Ctrl	Up-Up
SLC38A2	AT1	2.79885e-12	0.365024	0.572	0.469	5.18907e-08	L-TB vs. AL-TB	Up-Up
[truncated: 33,263 more rows]

## Sheet: Sheet2
DEGs between Tuberculosis and Control lungs in Bulk RNA-seq
gene_id	Symbol	log2FoldChange	pvalue	padj	group	type
ENSG00000002726	AOC1	1.51281	0.000505878	0.0278707	L-TB vs. AL-TB	Module 1
ENSG00000002726	AOC1	1.86155	8.4815e-05	0.00246378	L-TB vs. Ctrl	Module 1
ENSG00000002745	WNT16	1.99855	0.00226106	0.0305009	AL-TB vs. Ctrl	Module 2
ENSG00000002745	WNT16	1.69746	0.00392866	0.0398724	L-TB vs. Ctrl	Module 2
ENSG00000002746	HECW1	1.75867	0.00517686	0.0481794	L-TB vs. Ctrl	Module 1
ENSG00000003249	DBNDD1	-1.5438	0.00081724	0.0134627	L-TB vs. Ctrl	Module 3
ENSG00000005102	MEOX1	2.16584	2.06834e-05	0.00327773	L-TB vs. AL-TB	Module 4
ENSG00000005471	ABCB4	1.9048	5.28223e-06	0.000301933	L-TB vs. Ctrl	Module 1
ENSG00000005483	KMT2E	2.20503	5.92488e-09	1.77424e-06	AL-TB vs. Ctrl	Module 2
ENSG00000005483	KMT2E	1.85292	1.43579e-06	0.000104989	L-TB vs. Ctrl	Module 2
ENSG00000005961	ITGA2B	-1.52386	0.00318648	0.0375028	AL-TB vs. Ctrl	Module 3
ENSG00000005961	ITGA2B	-2.06719	1.89104e-05	0.000804572	L-TB vs. Ctrl	Module 3
ENSG00000006016	CRLF1	-2.16703	1.52522e-05	0.000927591	AL-TB vs. Ctrl	Module 4
ENSG00000006071	ABCC8	-2.55457	0.000208551	0.00490495	L-TB vs. Ctrl	Module 3
ENSG00000006128	TAC1	4.46816	0.000103769	0.00367932	AL-TB vs. Ctrl	Module 2
ENSG00000007312	CD79B	2.32316	9.1006e-07	7.21072e-05	L-TB vs. Ctrl	Module 4
ENSG00000007312	CD79B	2.16264	7.14366e-05	0.00749102	L-TB vs. AL-TB	Module 4
ENSG00000007908	SELE	4.07871	1.84755e-06	0.000195169	AL-TB vs. Ctrl	Module 1
ENSG00000007908	SELE	4.28214	1.58698e-07	1.73834e-05	L-TB vs. Ctrl	Module 1
ENSG00000008226	DLEC1	-1.88764	4.79701e-05	0.00162288	L-TB vs. Ctrl	Module 3
ENSG00000008735	MAPK8IP2	-1.54047	0.00201181	0.0256568	L-TB vs. Ctrl	Module 3
ENSG00000008853	RHOBTB2	-1.89693	2.22373e-07	2.30715e-05	L-TB vs. Ctrl	Module 3
ENSG00000009790	TRAF3IP3	1.55496	6.77135e-10	1.73992e-07	L-TB vs. Ctrl	Module 1
ENSG00000009950	MLXIPL	-1.6889	1.87514e-06	0.000197172	AL-TB vs. Ctrl	Module 3
ENSG00000009950	MLXIPL	-1.85806	7.35954e-05	0.00222845	L-TB vs. Ctrl	Module 3
ENSG00000010379	SLC6A13	-1.63696	0.00204503	0.0259585	L-TB vs. Ctrl	Module 3
ENSG00000010818	HIVEP2	1.5389	3.62872e-08	7.93422e-06	AL-TB vs. Ctrl	Module 2
ENSG00000010932	FMO1	2.02365	1.3116e-07	7.25444e-05	L-TB vs. AL-TB	Module 1
ENSG00000011590	ZBTB32	1.54167	0.000130402	0.00434763	AL-TB vs. Ctrl	Module 1
ENSG00000011590	ZBTB32	3.08814	1.72647e-12	1.15775e-09	L-TB vs. Ctrl	Module 1
ENSG00000011590	ZBTB32	1.55912	0.000256498	0.017268	L-TB vs. AL-TB	Module 1
ENSG00000012124	CD22	1.95827	1.14494e-10	3.74751e-08	L-TB vs. Ctrl	Module 1
ENSG00000012171	SEMA3B	-1.64807	0.000184839	0.00445007	L-TB vs. Ctrl	Module 3
ENSG00000012223	LTF	3.51618	9.50539e-11	3.22644e-08	L-TB vs. Ctrl	Module 1
ENSG00000012223	LTF	2.5072	1.30109e-06	0.000447574	L-TB vs. AL-TB	Module 1
ENSG00000015413	DPEP1	2.08998	0.000446834	0.0255148	L-TB vs. AL-TB	Module 1
ENSG00000015413	DPEP1	2.1853	0.000612447	0.0107944	L-TB vs. Ctrl	Module 1
ENSG00000020633	RUNX3	1.52294	2.82715e-09	5.93356e-07	L-TB vs. Ctrl	Module 1
ENSG00000026751	SLAMF7	2.36371	1.14773e-12	8.30414e-10	L-TB vs. Ctrl	Module 1
ENSG00000029559	IBSP	5.87766	3.30585e-09	3.21556e-06	L-TB vs. AL-TB	Module 4
ENSG00000029559	IBSP	3.7922	0.000492761	0.00922259	L-TB vs. Ctrl	Module 4
ENSG00000035720	STAP1	2.60829	1.00037e-11	4.82531e-09	L-TB vs. Ctrl	Module 1
ENSG00000042980	ADAM28	2.52686	3.99875e-13	3.55085e-10	L-TB vs. Ctrl	Module 1
ENSG00000043462	LCP2	1.53478	8.47363e-11	3.02564e-08	L-TB vs. Ctrl	Module 1
ENSG00000043591	ADRB1	-1.71168	0.000162301	0.0129694	L-TB vs. AL-TB	Module 2
ENSG00000047457	CP	2.17279	9.45796e-05	0.00266007	L-TB vs. Ctrl	Module 1
ENSG00000048462	TNFRSF17	2.25747	8.67619e-06	0.000440116	L-TB vs. Ctrl	Module 1
ENSG00000048462	TNFRSF17	1.84088	2.47369e-06	0.000766791	L-TB vs. AL-TB	Module 1
ENSG00000049249	TNFRSF9	3.26492	2.92536e-07	2.89316e-05	L-TB vs. Ctrl	Module 1
ENSG00000049283	EPN3	-1.6981	0.00124389	0.0182885	L-TB vs. Ctrl	Module 4
ENSG00000049768	FOXP3	1.99135	1.91657e-06	0.000197172	AL-TB vs. Ctrl	Module 1
ENSG00000049768	FOXP3	2.82735	2.20105e-15	4.03438e-12	L-TB vs. Ctrl	Module 1
ENSG00000054356	PTPRN	2.80637	9.86133e-05	0.00915594	L-TB vs. AL-TB	Module 1
ENSG00000054356	PTPRN	3.07872	0.00076904	0.0128457	L-TB vs. Ctrl	Module 1
ENSG00000054598	FOXC1	2.26706	7.97204e-07	0.000102631	AL-TB vs. Ctrl	Module 1
ENSG00000054598	FOXC1	2.84604	1.05214e-10	3.48525e-08	L-TB vs. Ctrl	Module 1
ENSG00000054803	CBLN4	2.41846	0.000102215	0.00945338	L-TB vs. AL-TB	Module 1
ENSG00000057657	PRDM1	2.05889	8.71136e-11	3.07064e-08	L-TB vs. Ctrl	Module 1
ENSG00000057657	PRDM1	1.76266	7.76096e-09	2.25068e-06	AL-TB vs. Ctrl	Module 1
ENSG00000059728	MXD1	1.53295	5.54011e-06	0.000448912	AL-TB vs. Ctrl	Module 2
ENSG00000059804	SLC2A3	1.98703	6.32026e-13	1.33941e-09	AL-TB vs. Ctrl	Module 2
ENSG00000059804	SLC2A3	2.08396	1.25432e-10	4.04039e-08	L-TB vs. Ctrl	Module 2
ENSG00000060718	COL11A1	4.09479	6.90057e-05	0.0021151	L-TB vs. Ctrl	Module 4
ENSG00000060718	COL11A1	4.75883	2.79585e-08	2.19071e-05	L-TB vs. AL-TB	Module 4
ENSG00000061656	SPAG4	2.19893	3.73157e-06	0.000226982	L-TB vs. Ctrl	Module 1
ENSG00000061656	SPAG4	1.81729	7.79703e-05	0.00794003	L-TB vs. AL-TB	Module 1
ENSG00000063438	AHRR	-1.54966	9.40588e-05	0.00265508	L-TB vs. Ctrl	Module 3
ENSG00000064205	WISP2	-1.75585	5.01235e-06	0.000415934	AL-TB vs. Ctrl	Module 4
ENSG00000064218	DMRT3	3.33556	2.07706e-06	0.000673444	L-TB vs. AL-TB	Module 4
ENSG00000066294	CD84	1.89886	9.78453e-07	7.59932e-05	L-TB vs. Ctrl	Module 1
ENSG00000067082	KLF6	1.92246	2.51894e-15	1.73492e-11	AL-TB vs. Ctrl	Module 2
ENSG00000067082	KLF6	1.56544	4.88585e-08	6.68316e-06	L-TB vs. Ctrl	Module 2
ENSG00000067191	CACNB1	-1.65245	7.73985e-06	0.000568991	AL-TB vs. Ctrl	Module 3
ENSG00000067191	CACNB1	-1.7073	6.96885e-06	0.000373493	L-TB vs. Ctrl	Module 3
ENSG00000067606	PRKCZ	-1.86477	6.55554e-09	1.22611e-06	L-TB vs. Ctrl	Module 3
ENSG00000069011	PITX1	2.77915	0.000926299	0.0408905	L-TB vs. AL-TB	Module 4
ENSG00000070915	SLC12A3	1.74064	0.00139672	0.0198765	L-TB vs. Ctrl	Module 1
ENSG00000071909	MYO3B	2.14392	0.00351874	0.0368549	L-TB vs. Ctrl	Module 1
ENSG00000072694	FCGR2B	1.81967	3.16019e-06	0.000198825	L-TB vs. Ctrl	Module 1
ENSG00000072694	FCGR2B	1.55836	1.01992e-05	0.00200538	L-TB vs. AL-TB	Module 1
ENSG00000073350	LLGL2	-1.85843	5.80639e-06	0.000327932	L-TB vs. Ctrl	Module 3
ENSG00000073754	CD5L	-2.12781	6.18107e-05	0.00195786	L-TB vs. Ctrl	Module 3
ENSG00000073756	PTGS2	2.66058	2.32894e-12	3.82707e-09	AL-TB vs. Ctrl	Module 2
ENSG00000073756	PTGS2	1.64	3.72915e-05	0.00133528	L-TB vs. Ctrl	Module 2
ENSG00000074317	SNCB	3.66659	5.83469e-05	0.00187405	L-TB vs. Ctrl	Module 1
ENSG00000075426	FOSL2	1.58558	1.48763e-05	0.00066941	L-TB vs. Ctrl	Module 2
ENSG00000075426	FOSL2	1.55794	1.04775e-05	0.000715637	AL-TB vs. Ctrl	Module 2
ENSG00000075461	CACNG4	-1.73867	0.00429989	0.0424601	L-TB vs. Ctrl	Module 3
ENSG00000076826	CAMSAP3	-1.70165	0.000455073	0.00871661	L-TB vs. Ctrl	Module 3
ENSG00000078098	FAP	1.52434	0.000226575	0.0161694	L-TB vs. AL-TB	Module 1
ENSG00000078399	HOXA9	1.63133	0.000317206	0.0202437	L-TB vs. AL-TB	Module 4
ENSG00000078589	P2RY10	2.79572	6.47531e-08	8.54163e-06	L-TB vs. Ctrl	Module 1
ENSG00000078589	P2RY10	2.12611	8.81707e-06	0.000624448	AL-TB vs. Ctrl	Module 1
ENSG00000078725	BRINP1	-2.48772	0.000240467	0.00543701	L-TB vs. Ctrl	Module 3
ENSG00000079263	SP140	2.06139	6.03272e-11	2.2721e-08	L-TB vs. Ctrl	Module 1
ENSG00000081059	TCF7	1.74172	2.02377e-12	1.3248e-09	L-TB vs. Ctrl	Module 1
ENSG00000081985	IL12RB2	2.32068	5.57788e-06	0.000318171	L-TB vs. Ctrl	Module 1
ENSG00000081985	IL12RB2	1.8255	0.000132427	0.00439034	AL-TB vs. Ctrl	Module 1
ENSG00000082074	FYB	1.92701	2.71652e-06	0.000260483	AL-TB vs. Ctrl	Module 1
ENSG00000082074	FYB	2.17116	1.75402e-07	1.90612e-05	L-TB vs. Ctrl	Module 1
ENSG00000083454	P2RX5	2.88971	2.19763e-08	3.33821e-06	L-TB vs. Ctrl	Module 1
ENSG00000083454	P2RX5	2.19233	6.76833e-06	0.00157786	L-TB vs. AL-TB	Module 1
ENSG00000083782	EPYC	3.96647	3.06952e-06	0.000194455	L-TB vs. Ctrl	Module 1
ENSG00000084453	SLCO1A2	1.70651	0.00150497	0.0235312	AL-TB vs. Ctrl	Module 2
ENSG00000084734	GCKR	1.90339	0.00036819	0.0224803	L-TB vs. AL-TB	Module 4
ENSG00000085552	IGSF9	-1.75146	2.01549e-05	0.00114725	AL-TB vs. Ctrl	Module 4
ENSG00000086548	CEACAM6	-1.76131	0.000546584	0.00993243	L-TB vs. Ctrl	Module 3
ENSG00000086967	MYBPC2	2.19591	0.00167655	0.022574	L-TB vs. Ctrl	Module 1
ENSG00000087074	PPP1R15A	1.66732	1.4015e-08	3.54232e-06	AL-TB vs. Ctrl	Module 2
ENSG00000087494	PTHLH	2.40106	1.30408e-06	0.000152033	AL-TB vs. Ctrl	Module 1
ENSG00000087494	PTHLH	3.00509	2.51817e-11	1.06515e-08	L-TB vs. Ctrl	Module 1
ENSG00000087903	RFX2	1.82652	2.17275e-06	0.00021767	AL-TB vs. Ctrl	Module 2
ENSG00000088340	FER1L4	2.78049	1.72473e-08	2.72527e-06	L-TB vs. Ctrl	Module 1
ENSG00000088340	FER1L4	2.46862	2.34067e-08	1.94193e-05	L-TB vs. AL-TB	Module 1
ENSG00000088882	CPXM1	1.72017	0.00145544	0.0205209	L-TB vs. Ctrl	Module 4
ENSG00000088899	LZTS3	-1.50092	3.43062e-06	0.000212362	L-TB vs. Ctrl	Module 3
ENSG00000089012	SIRPG	2.06929	2.9896e-09	6.22697e-07	L-TB vs. Ctrl	Module 1
ENSG00000089169	RPH3A	2.4331	1.41867e-06	0.000159488	AL-TB vs. Ctrl	Module 2
ENSG00000089199	CHGB	2.32784	7.09277e-05	0.00216196	L-TB vs. Ctrl	Module 1
ENSG00000090061	CCNK	1.59484	9.03522e-05	0.00335472	AL-TB vs. Ctrl	Module 2
ENSG00000090104	RGS1	3.42595	2.17352e-12	1.38275e-09	L-TB vs. Ctrl	Module 1
ENSG00000090104	RGS1	2.56341	1.22402e-08	3.18129e-06	AL-TB vs. Ctrl	Module 1
ENSG00000090382	LYZ	1.89587	0.00200898	0.0256549	L-TB vs. Ctrl	Module 1
ENSG00000091181	IL5RA	1.64865	0.000928224	0.017037	AL-TB vs. Ctrl	Module 2
ENSG00000091656	ZFHX4	1.90783	0.000336763	0.00700375	L-TB vs. Ctrl	Module 1
ENSG00000091704	CPA1	-1.76373	0.00214657	0.0294031	AL-TB vs. Ctrl	Module 3
ENSG00000091986	CCDC80	1.81803	0.000135911	0.00350792	L-TB vs. Ctrl	Module 1
ENSG00000092295	TGM1	-1.51407	9.46224e-05	0.00266007	L-TB vs. Ctrl	Module 3
ENSG00000092345	DAZL	4.68922	4.95536e-05	0.00165988	L-TB vs. Ctrl	Module 1
ENSG00000092345	DAZL	3.47894	0.000175832	0.0136809	L-TB vs. AL-TB	Module 1
ENSG00000092758	COL9A3	1.80821	0.000614359	0.031915	L-TB vs. AL-TB	Module 4
ENSG00000092853	CLSPN	1.56738	0.0010663	0.0163325	L-TB vs. Ctrl	Module 1
ENSG00000093134	VNN3	1.91748	0.000636799	0.0130534	AL-TB vs. Ctrl	Module 2
ENSG00000095587	TLL2	3.00416	1.02995e-05	0.000498545	L-TB vs. Ctrl	Module 1
ENSG00000095587	TLL2	2.03273	7.23671e-05	0.00756049	L-TB vs. AL-TB	Module 1
ENSG00000095596	CYP26A1	4.17485	3.32227e-06	0.000207128	L-TB vs. Ctrl	Module 1
ENSG00000095596	CYP26A1	2.18367	0.00362071	0.0404668	AL-TB vs. Ctrl	Module 1
ENSG00000095794	CREM	1.53882	4.34775e-06	0.000370837	AL-TB vs. Ctrl	Module 1
ENSG00000095794	CREM	1.52402	8.77935e-07	7.05788e-05	L-TB vs. Ctrl	Module 1
ENSG00000095951	HIVEP1	1.68605	5.27019e-05	0.00228292	AL-TB vs. Ctrl	Module 2
ENSG00000099194	SCD	-1.61734	1.80088e-06	0.000127284	L-TB vs. Ctrl	Module 3
ENSG00000099849	RASSF7	-1.77403	0.00230628	0.028061	L-TB vs. Ctrl	Module 3
ENSG00000099849	RASSF7	-1.6307	0.00383013	0.0417405	AL-TB vs. Ctrl	Module 3
ENSG00000099860	GADD45B	1.597	9.77535e-06	0.000673277	AL-TB vs. Ctrl	Module 2
ENSG00000099953	MMP11	1.53826	0.00324764	0.0378961	AL-TB vs. Ctrl	Module 1
ENSG00000099953	MMP11	2.28319	0.00100887	0.0429883	L-TB vs. AL-TB	Module 1
ENSG00000099953	MMP11	2.24707	0.00485422	0.0460372	L-TB vs. Ctrl	Module 1
ENSG00000099958	DERL3	2.97405	7.02695e-09	1.27946e-06	L-TB vs. Ctrl	Module 1
ENSG00000099958	DERL3	2.75374	7.4348e-08	4.66046e-05	L-TB vs. AL-TB	Module 1
ENSG00000099985	OSM	2.71172	3.74791e-05	0.00133999	L-TB vs. Ctrl	Module 1
ENSG00000100033	PRODH	-2.71481	6.2259e-08	8.26932e-06	L-TB vs. Ctrl	Module 3
ENSG00000100033	PRODH	-1.72162	4.52069e-05	0.00200556	AL-TB vs. Ctrl	Module 3
ENSG00000100078	PLA2G3	-2.24595	0.000117405	0.00311349	L-TB vs. Ctrl	Module 3
ENSG00000100078	PLA2G3	-1.94151	2.29676e-06	0.00022761	AL-TB vs. Ctrl	Module 3
ENSG00000100079	LGALS2	1.64729	6.27021e-05	0.00197926	L-TB vs. Ctrl	Module 1
ENSG00000100095	SEZ6L	1.55068	0.000221426	0.00511157	L-TB vs. Ctrl	Module 1
ENSG00000100122	CRYBB1	1.51574	0.00114569	0.0465671	L-TB vs. AL-TB	Module 4
ENSG00000100385	IL2RB	1.60866	4.33408e-06	0.000254507	L-TB vs. Ctrl	Module 1
ENSG00000100473	COCH	2.6387	7.91037e-08	9.79675e-06	L-TB vs. Ctrl	Module 1
ENSG00000100473	COCH	1.89096	2.01167e-05	0.0032248	L-TB vs. AL-TB	Module 1
ENSG00000100721	TCL1A	2.29064	0.00315131	0.0343546	L-TB vs. Ctrl	Module 1
ENSG00000100985	MMP9	2.83759	3.84397e-07	5.82799e-05	AL-TB vs. Ctrl	Module 1
ENSG00000100985	MMP9	4.67884	7.46646e-14	8.92534e-11	L-TB vs. Ctrl	Module 1
ENSG00000101096	NFATC2	2.33616	7.26789e-12	3.84276e-09	L-TB vs. Ctrl	Module 2
ENSG00000101096	NFATC2	2.6364	4.07759e-13	1.02125e-09	AL-TB vs. Ctrl	Module 2
ENSG00000101134	DOK5	1.94532	5.61364e-06	0.00143954	L-TB vs. AL-TB	Module 4
ENSG00000101134	DOK5	1.51485	0.00209157	0.0263545	L-TB vs. Ctrl	Module 4
ENSG00000101198	NKAIN4	2.32136	0.000908875	0.0145531	L-TB vs. Ctrl	Module 1
ENSG00000101255	TRIB3	-1.75208	0.000291518	0.00756957	AL-TB vs. Ctrl	Module 4
ENSG00000101255	TRIB3	-1.83216	4.15908e-05	0.00146511	L-TB vs. Ctrl	Module 4
ENSG00000101463	SYNDIG1	2.3676	2.74838e-06	0.000179062	L-TB vs. Ctrl	Module 4
ENSG00000101463	SYNDIG1	2.29834	1.71527e-05	0.00292634	L-TB vs. AL-TB	Module 4
ENSG00000101825	MXRA5	2.70414	4.8393e-09	9.30432e-07	L-TB vs. Ctrl	Module 1
ENSG00000101825	MXRA5	1.69869	2.13312e-07	0.000103743	L-TB vs. AL-TB	Module 1
ENSG00000102096	PIM2	2.36933	8.34777e-14	9.56307e-11	L-TB vs. Ctrl	Module 1
ENSG00000102104	RS1	-1.59417	0.000117727	0.0102106	L-TB vs. AL-TB	Module 3
ENSG00000102104	RS1	-1.92735	9.53739e-05	0.00267572	L-TB vs. Ctrl	Module 3
ENSG00000102245	CD40LG	2.06411	4.53346e-07	4.12725e-05	L-TB vs. Ctrl	Module 1
ENSG00000102245	CD40LG	1.83825	3.86799e-05	0.00179688	AL-TB vs. Ctrl	Module 1
ENSG00000102445	KIAA0226L	1.69731	5.81149e-08	7.75637e-06	L-TB vs. Ctrl	Module 1
ENSG00000102524	TNFSF13B	1.63271	5.73614e-06	0.000325846	L-TB vs. Ctrl	Module 1
ENSG00000102802	MEDAG	1.86465	0.000597812	0.0106035	L-TB vs. Ctrl	Module 1
ENSG00000102854	MSLN	-1.74725	0.00201557	0.0256679	L-TB vs. Ctrl	Module 3
ENSG00000102934	PLLP	-1.65963	0.000276188	0.00603139	L-TB vs. Ctrl	Module 3
ENSG00000102962	CCL22	1.86026	1.12483e-07	1.32163e-05	L-TB vs. Ctrl	Module 1
ENSG00000103067	ESRP2	-1.58424	0.000139116	0.00356131	L-TB vs. Ctrl	Module 3
ENSG00000103254	FAM173A	-1.62189	0.00385139	0.0418594	AL-TB vs. Ctrl	Module 4
ENSG00000103257	SLC7A5	1.51438	0.0041561	0.0414615	L-TB vs. Ctrl	Module 1
ENSG00000103522	IL21R	1.50087	0.00279331	0.0318405	L-TB vs. Ctrl	Module 1
ENSG00000103742	IGDCC4	1.67748	0.000149875	0.0122898	L-TB vs. AL-TB	Module 1
ENSG00000103742	IGDCC4	2.42515	2.75776e-05	0.00106942	L-TB vs. Ctrl	Module 1
ENSG00000104044	OCA2	-1.66977	0.000579137	0.0103731	L-TB vs. Ctrl	Module 3
ENSG00000104213	PDGFRL	1.95582	1.7571e-05	0.0029328	L-TB vs. AL-TB	Module 4
ENSG00000104213	PDGFRL	1.62054	0.000876401	0.014149	L-TB vs. Ctrl	Module 4
ENSG00000104237	RP1	-2.27415	4.61867e-05	0.00157551	L-TB vs. Ctrl	Module 3
ENSG00000104321	TRPA1	2.94874	4.31851e-05	0.00149916	L-TB vs. Ctrl	Module 1
ENSG00000104415	WISP1	1.85978	1.72364e-05	0.00292634	L-TB vs. AL-TB	Module 4
ENSG00000104435	STMN2	3.68192	2.27463e-07	2.33353e-05	L-TB vs. Ctrl	Module 1
ENSG00000104804	TULP2	1.97303	0.00306232	0.0338406	L-TB vs. Ctrl	Module 2
ENSG00000104804	TULP2	1.95226	0.000676118	0.0135568	AL-TB vs. Ctrl	Module 2
ENSG00000104814	MAP4K1	1.57047	1.76166e-09	3.90605e-07	L-TB vs. Ctrl	Module 1
ENSG00000104892	KLC3	-2.59095	4.06698e-05	0.00538598	L-TB vs. AL-TB	Module 3
ENSG00000104899	AMH	-1.83842	0.00352265	0.0397334	AL-TB vs. Ctrl	Module 3
ENSG00000104899	AMH	-2.18127	0.000555506	0.0100415	L-TB vs. Ctrl	Module 3
ENSG00000104921	FCER2	2.73161	3.41312e-08	4.8622e-06	L-TB vs. Ctrl	Module 1
ENSG00000104921	FCER2	1.96148	3.35955e-05	0.00463619	L-TB vs. AL-TB	Module 1
ENSG00000104951	IL4I1	2.40793	7.57886e-05	0.0022762	L-TB vs. Ctrl	Module 1
ENSG00000104970	KIR3DX1	1.84258	0.00041942	0.00979239	AL-TB vs. Ctrl	Module 2
ENSG00000104970	KIR3DX1	1.55876	0.00290012	0.032692	L-TB vs. Ctrl	Module 2
ENSG00000105261	OVOL3	4.77803	2.71699e-05	0.00105959	L-TB vs. Ctrl	Module 1
ENSG00000105369	CD79A	1.549	0.000785163	0.0151798	AL-TB vs. Ctrl	Module 1
ENSG00000105369	CD79A	4.4582	1.77585e-15	3.48751e-12	L-TB vs. Ctrl	Module 1
ENSG00000105369	CD79A	2.92686	5.9167e-07	0.000238426	L-TB vs. AL-TB	Module 1
ENSG00000105523	FAM83E	-1.78171	0.000235301	0.00534602	L-TB vs. Ctrl	Module 3
ENSG00000105664	COMP	3.53617	4.02597e-08	2.83912e-05	L-TB vs. AL-TB	Module 4
ENSG00000105664	COMP	3.03335	1.1754e-05	0.000548665	L-TB vs. Ctrl	Module 4
ENSG00000105880	DLX5	2.26722	0.000365892	0.00743086	L-TB vs. Ctrl	Module 1
ENSG00000106258	CYP3A5	-1.61064	0.00153036	0.0211862	L-TB vs. Ctrl	Module 3
ENSG00000106328	FSCN3	1.98105	0.000244097	0.00672184	AL-TB vs. Ctrl	Module 2
ENSG00000106366	SERPINE1	1.82548	0.00128568	0.0187425	L-TB vs. Ctrl	Module 2
ENSG00000106366	SERPINE1	1.70237	0.000970814	0.0175613	AL-TB vs. Ctrl	Module 2
ENSG00000106483	SFRP4	2.08301	0.000234956	0.00534316	L-TB vs. Ctrl	Module 1
ENSG00000106483	SFRP4	1.95432	2.43321e-05	0.00367037	L-TB vs. AL-TB	Module 1
ENSG00000106633	GCK	-1.60009	0.00168468	0.0251561	AL-TB vs. Ctrl	Module 4
ENSG00000106688	SLC1A1	-1.60568	8.28416e-05	0.00241785	L-TB vs. Ctrl	Module 3
ENSG00000106689	LHX2	3.64113	0.00390228	0.0396927	L-TB vs. Ctrl	Module 1
ENSG00000106952	TNFSF8	1.6919	9.39881e-05	0.00265508	L-TB vs. Ctrl	Module 1
ENSG00000107295	SH3GL2	-1.61058	0.000349183	0.0216003	L-TB vs. AL-TB	Module 3
ENSG00000107295	SH3GL2	-2.21851	9.20934e-07	7.23433e-05	L-TB vs. Ctrl	Module 3
ENSG00000107485	GATA3	2.19072	1.84897e-06	0.000195169	AL-TB vs. Ctrl	Module 1
ENSG00000108001	EBF3	1.77911	0.000293475	0.0193029	L-TB vs. AL-TB	Module 1
ENSG00000108001	EBF3	1.70272	0.00205198	0.0260227	L-TB vs. Ctrl	Module 1
ENSG00000108342	CSF3	3.49825	1.76735e-05	0.000764698	L-TB vs. Ctrl	Module 2
ENSG00000108342	CSF3	4.42235	1.33094e-09	4.889e-07	AL-TB vs. Ctrl	Module 2
ENSG00000108576	SLC6A4	-2.13161	0.000751485	0.0357807	L-TB vs. AL-TB	Module 2
ENSG00000108688	CCL7	4.53031	5.0339e-05	0.00166779	L-TB vs. Ctrl	Module 1
ENSG00000108700	CCL8	2.6212	1.58405e-07	1.73834e-05	L-TB vs. Ctrl	Module 1
ENSG00000108700	CCL8	2.02355	6.54513e-06	0.000506674	AL-TB vs. Ctrl	Module 1
ENSG00000108821	COL1A1	2.8047	1.82028e-09	4.00374e-07	L-TB vs. Ctrl	Module 1
ENSG00000108821	COL1A1	2.31468	6.20487e-08	3.97789e-05	L-TB vs. AL-TB	Module 1
ENSG00000108878	CACNG1	-3.37516	0.00205027	0.026013	L-TB vs. Ctrl	Module 3
ENSG00000109265	KIAA1211	1.92516	0.000940546	0.0149219	L-TB vs. Ctrl	Module 1
ENSG00000109321	AREG	2.42845	1.16179e-05	0.000773122	AL-TB vs. Ctrl	Module 2
ENSG00000109471	IL2	4.07847	7.18196e-05	0.00284801	AL-TB vs. Ctrl	Module 2
ENSG00000109471	IL2	2.84381	0.00110946	0.0168527	L-TB vs. Ctrl	Module 2
ENSG00000109625	CPZ	2.04784	0.000314183	0.0201879	L-TB vs. AL-TB	Module 4
ENSG00000109684	CLNK	2.01221	0.000123299	0.00418852	AL-TB vs. Ctrl	Module 1
ENSG00000109684	CLNK	2.00638	5.62142e-06	0.00031999	L-TB vs. Ctrl	Module 1
ENSG00000110344	UBE4A	1.57558	0.00111491	0.0191317	AL-TB vs. Ctrl	Module 2
ENSG00000110347	MMP12	2.97079	4.63161e-06	0.00128253	L-TB vs. AL-TB	Module 1
ENSG00000110347	MMP12	3.74209	7.20179e-06	0.00038299	L-TB vs. Ctrl	Module 1
ENSG00000110427	KIAA1549L	2.14347	0.000417477	0.00976067	AL-TB vs. Ctrl	Module 1
ENSG00000110427	KIAA1549L	1.90931	0.000725479	0.0123115	L-TB vs. Ctrl	Module 1
ENSG00000110448	CD5	1.57487	1.90271e-06	0.000197172	AL-TB vs. Ctrl	Module 1
ENSG00000110448	CD5	1.90783	1.1368e-08	1.92758e-06	L-TB vs. Ctrl	Module 1
ENSG00000110777	POU2AF1	1.81927	1.31893e-05	0.000839178	AL-TB vs. Ctrl	Module 1
ENSG00000110777	POU2AF1	1.82937	1.03084e-05	0.00200538	L-TB vs. AL-TB	Module 1
ENSG00000110777	POU2AF1	3.63099	1.34808e-20	7.41281e-17	L-TB vs. Ctrl	Module 1
ENSG00000110848	CD69	1.74801	8.9147e-07	0.000112146	AL-TB vs. Ctrl	Module 1
ENSG00000110848	CD69	2.22416	3.09932e-07	3.02172e-05	L-TB vs. Ctrl	Module 1
ENSG00000111218	PRMT8	-2.57395	0.00089706	0.014421	L-TB vs. Ctrl	Module 3
ENSG00000111262	KCNA1	3.17291	0.00317212	0.0345203	L-TB vs. Ctrl	Module 1
ENSG00000111319	SCNN1A	-1.84035	1.89753e-05	0.000805103	L-TB vs. Ctrl	Module 3
ENSG00000111344	RASAL1	2.07985	0.000762131	0.0127613	L-TB vs. Ctrl	Module 1
ENSG00000111536	IL26	2.96469	0.00104474	0.016065	L-TB vs. Ctrl	Module 1
ENSG00000111537	IFNG	2.77745	0.000124139	0.00325985	L-TB vs. Ctrl	Module 2
ENSG00000111537	IFNG	2.03693	0.000147546	0.00468413	AL-TB vs. Ctrl	Module 2
ENSG00000111671	SPSB2	-1.68401	6.87562e-05	0.00275325	AL-TB vs. Ctrl	Module 3
ENSG00000111671	SPSB2	-1.59202	0.0039212	0.0398336	L-TB vs. Ctrl	Module 3
ENSG00000111837	MAK	1.59128	3.00225e-05	0.00150178	AL-TB vs. Ctrl	Module 2
ENSG00000111886	GABRR2	2.18563	0.000211756	0.00494648	L-TB vs. Ctrl	Module 1
ENSG00000112149	CD83	1.54412	6.57757e-06	0.000506674	AL-TB vs. Ctrl	Module 2
ENSG00000112195	TREML2	1.52627	0.000526479	0.011385	AL-TB vs. Ctrl	Module 2
ENSG00000112486	CCR6	2.81667	0.000166651	0.00409831	L-TB vs. Ctrl	Module 1
ENSG00000112486	CCR6	2.16985	0.00170989	0.0253948	AL-TB vs. Ctrl	Module 1
ENSG00000112530	PACRG	-1.69491	0.00103789	0.0159954	L-TB vs. Ctrl	Module 3
ENSG00000112562	SMOC2	1.86071	8.84688e-05	0.00254282	L-TB vs. Ctrl	Module 1
ENSG00000112562	SMOC2	1.69631	6.49113e-06	0.00153867	L-TB vs. AL-TB	Module 1
ENSG00000112782	CLIC5	-1.73348	9.90843e-06	0.00199297	L-TB vs. AL-TB	Module 2
ENSG00000112837	TBX18	1.94871	0.00062296	0.0319973	L-TB vs. AL-TB	Module 4
ENSG00000113070	HBEGF	1.79315	5.19844e-07	7.41644e-05	AL-TB vs. Ctrl	Module 2
ENSG00000113088	GZMK	1.66604	0.000134535	0.00348624	L-TB vs. Ctrl	Module 1
ENSG00000113249	HAVCR1	3.34035	8.72898e-06	0.000441479	L-TB vs. Ctrl	Module 1
ENSG00000113263	ITK	1.66168	2.34703e-05	0.00127536	AL-TB vs. Ctrl	Module 1
ENSG00000113263	ITK	1.87278	7.26114e-06	0.000384659	L-TB vs. Ctrl	Module 1
ENSG00000113525	IL5	5.74428	3.50103e-07	3.35392e-05	L-TB vs. Ctrl	Module 1
ENSG00000113763	UNC5A	1.75097	0.000985701	0.0154421	L-TB vs. Ctrl	Module 1
ENSG00000114638	UPK1B	-3.93578	3.61551e-05	0.00171737	AL-TB vs. Ctrl	Module 4
ENSG00000114646	CSPG5	-2.44776	2.89075e-05	0.00109929	L-TB vs. Ctrl	Module 3
ENSG00000114646	CSPG5	-2.05466	2.05189e-05	0.00116077	AL-TB vs. Ctrl	Module 3
ENSG00000114786	ABHD14A-ACY1	-2.54252	0.00388591	0.0420311	AL-TB vs. Ctrl	Module 4
ENSG00000114948	ADAM23	2.21848	8.79695e-09	1.55041e-06	L-TB vs. Ctrl	Module 1
ENSG00000115009	CCL20	1.57925	0.00100561	0.015647	L-TB vs. Ctrl	Module 2
ENSG00000115165	CYTIP	1.6324	3.58957e-06	0.000220786	L-TB vs. Ctrl	Module 1
ENSG00000115363	EVA1A	-1.53287	5.76254e-05	0.001861	L-TB vs. Ctrl	Module 3
ENSG00000115602	IL1RL1	-2.0995	1.83747e-06	0.000609782	L-TB vs. AL-TB	Module 2
ENSG00000115602	IL1RL1	-1.65144	0.00213937	0.0268262	L-TB vs. Ctrl	Module 2
ENSG00000115828	QPCT	1.69933	3.40079e-05	0.00124172	L-TB vs. Ctrl	Module 1
ENSG00000116191	RALGPS2	1.65676	2.03525e-06	0.00014096	L-TB vs. Ctrl	Module 1
ENSG00000116285	ERRFI1	1.77616	8.6457e-09	2.45556e-06	AL-TB vs. Ctrl	Module 2
ENSG00000116661	FBXO2	-1.78971	0.000239384	0.00663484	AL-TB vs. Ctrl	Module 3
ENSG00000116741	RGS2	2.04391	7.03747e-08	1.39484e-05	AL-TB vs. Ctrl	Module 2
ENSG00000116741	RGS2	1.88862	1.95621e-07	2.06862e-05	L-TB vs. Ctrl	Module 2
ENSG00000116748	AMPD1	2.53927	1.30064e-08	2.1542e-06	L-TB vs. Ctrl	Module 1
ENSG00000117115	PADI2	1.74209	2.3165e-05	0.0012657	AL-TB vs. Ctrl	Module 1
ENSG00000117115	PADI2	1.77987	1.25189e-07	1.44796e-05	L-TB vs. Ctrl	Module 1
ENSG00000117215	PLA2G2D	1.73171	0.00217025	0.0295991	AL-TB vs. Ctrl	Module 1
ENSG00000117215	PLA2G2D	3.79899	6.52525e-09	1.22611e-06	L-TB vs. Ctrl	Module 1
ENSG00000117228	GBP1	1.74091	2.10451e-08	4.9135e-06	AL-TB vs. Ctrl	Module 2
ENSG00000117322	CR2	7.03175	3.17917e-21	2.1852e-17	L-TB vs. Ctrl	Module 1
ENSG00000117322	CR2	2.53055	0.000156449	0.0126451	L-TB vs. AL-TB	Module 1
ENSG00000117322	CR2	4.50283	3.68697e-09	1.20924e-06	AL-TB vs. Ctrl	Module 1
ENSG00000117479	SLC19A2	1.79451	2.71535e-06	0.000260483	AL-TB vs. Ctrl	Module 2
ENSG00000117601	SERPINC1	-1.9976	0.00280774	0.0319387	L-TB vs. Ctrl	Module 3
ENSG00000117971	CHRNB4	3.12303	0.000516149	0.0282709	L-TB vs. AL-TB	Module 1
ENSG00000117971	CHRNB4	2.94137	0.00334184	0.0357147	L-TB vs. Ctrl	Module 1
ENSG00000118137	APOA1	-1.64761	0.00387636	0.0419622	AL-TB vs. Ctrl	Module 3
ENSG00000118194	TNNT2	-1.70814	0.000548	0.00994503	L-TB vs. Ctrl	Module 3
ENSG00000118263	KLF7	1.50203	1.01668e-05	0.000698492	AL-TB vs. Ctrl	Module 2
ENSG00000118322	ATP10B	2.4317	0.000117337	0.0102106	L-TB vs. AL-TB	Module 1
ENSG00000118503	TNFAIP3	1.85382	0.000264884	0.00585176	L-TB vs. Ctrl	Module 2
ENSG00000118503	TNFAIP3	1.90234	5.88688e-05	0.00247987	AL-TB vs. Ctrl	Module 2
ENSG00000118515	SGK1	1.60947	4.82103e-06	0.000278465	L-TB vs. Ctrl	Module 2
ENSG00000118785	SPP1	3.99159	1.86462e-09	1.94804e-06	L-TB vs. AL-TB	Module 4
ENSG00000118785	SPP1	4.0041	1.54991e-07	1.71138e-05	L-TB vs. Ctrl	Module 4
ENSG00000118849	RARRES1	-1.66234	4.26712e-05	0.00193037	AL-TB vs. Ctrl	Module 4
ENSG00000118985	ELL2	1.75564	1.04429e-08	2.84853e-06	AL-TB vs. Ctrl	Module 2
ENSG00000118985	ELL2	1.61518	2.00322e-09	4.35161e-07	L-TB vs. Ctrl	Module 2
ENSG00000119508	NR4A3	3.66723	1.72657e-12	3.17114e-09	AL-TB vs. Ctrl	Module 2
ENSG00000119508	NR4A3	3.26901	2.48552e-11	1.06515e-08	L-TB vs. Ctrl	Module 2
ENSG00000119630	PGF	-1.58361	0.0025488	0.0329205	AL-TB vs. Ctrl	Module 4
ENSG00000119737	GPR75	2.3484	5.85468e-08	1.19479e-05	AL-TB vs. Ctrl	Module 2
ENSG00000119737	GPR75	1.83498	0.000285693	0.00620447	L-TB vs. Ctrl	Module 2
ENSG00000119866	BCL11A	1.70039	1.80552e-07	1.95436e-05	L-TB vs. Ctrl	Module 1
ENSG00000120149	MSX2	1.57727	0.000367259	0.00744098	L-TB vs. Ctrl	Module 1
ENSG00000120337	TNFSF18	2.4932	2.31618e-05	0.000939247	L-TB vs. Ctrl	Module 1
ENSG00000120498	TEX11	3.87312	0.000111724	0.00300268	L-TB vs. Ctrl	Module 1
ENSG00000120498	TEX11	3.3671	8.94408e-05	0.00864023	L-TB vs. AL-TB	Module 1
ENSG00000120659	TNFSF11	2.68422	0.00123831	0.0205316	AL-TB vs. Ctrl	Module 1
ENSG00000120659	TNFSF11	3.71291	2.99201e-06	0.000190422	L-TB vs. Ctrl	Module 1
ENSG00000120694	HSPH1	1.62543	1.9066e-05	0.000807571	L-TB vs. Ctrl	Module 1
ENSG00000120738	EGR1	2.38085	9.4982e-10	3.73822e-07	AL-TB vs. Ctrl	Module 2
ENSG00000120738	EGR1	2.60444	4.57321e-09	8.98113e-07	L-TB vs. Ctrl	Module 2
ENSG00000121053	EPX	-1.90381	0.00167659	0.022574	L-TB vs. Ctrl	Module 3
ENSG00000121270	ABCC11	2.36027	0.00239081	0.0316515	AL-TB vs. Ctrl	Module 2
ENSG00000121895	TMEM156	1.89676	9.5549e-05	0.00348198	AL-TB vs. Ctrl	Module 1
ENSG00000121895	TMEM156	2.92586	4.58198e-11	1.74968e-08	L-TB vs. Ctrl	Module 1
ENSG00000121898	CPXM2	1.61726	0.000318078	0.00668595	L-TB vs. Ctrl	Module 1
ENSG00000121898	CPXM2	1.50443	0.000128573	0.010924	L-TB vs. AL-TB	Module 1
ENSG00000121904	CSMD2	2.37838	2.55704e-06	0.00016819	L-TB vs. Ctrl	Module 1
ENSG00000121966	CXCR4	1.91689	7.31173e-08	9.33016e-06	L-TB vs. Ctrl	Module 1
ENSG00000122188	LAX1	2.60447	2.85492e-10	8.09208e-08	L-TB vs. Ctrl	Module 1
ENSG00000122224	LY9	2.23205	1.60227e-09	3.58152e-07	L-TB vs. Ctrl	Module 1
ENSG00000122691	TWIST1	3.2366	1.31285e-06	9.72927e-05	L-TB vs. Ctrl	Module 1
ENSG00000122691	TWIST1	2.10618	0.000937612	0.0411324	L-TB vs. AL-TB	Module 1
ENSG00000122824	NUDT10	1.63182	0.00074999	0.0357807	L-TB vs. AL-TB	Module 4
ENSG00000122877	EGR2	1.71853	0.000178411	0.00432941	L-TB vs. Ctrl	Module 1
ENSG00000123342	MMP19	2.95921	1.44062e-13	4.40989e-10	AL-TB vs. Ctrl	Module 2
ENSG00000123342	MMP19	2.65464	5.26532e-10	1.41926e-07	L-TB vs. Ctrl	Module 2
ENSG00000123358	NR4A1	2.16367	5.75793e-06	0.000326409	L-TB vs. Ctrl	Module 2
ENSG00000123358	NR4A1	2.04207	6.6024e-06	0.000506674	AL-TB vs. Ctrl	Module 2
ENSG00000123500	COL10A1	2.5177	0.000347435	0.00860004	AL-TB vs. Ctrl	Module 1
ENSG00000123572	NRK	2.07943	0.00145929	0.0205542	L-TB vs. Ctrl	Module 1
ENSG00000123843	C4BPB	-1.82614	2.91596e-05	0.00147419	AL-TB vs. Ctrl	Module 3
ENSG00000123843	C4BPB	-2.53596	3.89927e-06	0.000235102	L-TB vs. Ctrl	Module 3
ENSG00000124159	MATN4	-2.37979	0.000351291	0.00722955	L-TB vs. Ctrl	Module 3
ENSG00000124203	ZNF831	1.5941	3.79688e-05	0.00135573	L-TB vs. Ctrl	Module 1
ENSG00000124253	PCK1	-3.5661	0.000992234	0.0177969	AL-TB vs. Ctrl	Module 4
ENSG00000124256	ZBP1	2.15911	4.37837e-10	1.19187e-07	L-TB vs. Ctrl	Module 1
ENSG00000124399	RP11-663P9.2	-1.81285	0.00294673	0.0359189	AL-TB vs. Ctrl	Module 4
ENSG00000124466	LYPD3	1.81425	4.04582e-07	3.75797e-05	L-TB vs. Ctrl	Module 1
ENSG00000124469	CEACAM8	2.14843	0.00213934	0.0293667	AL-TB vs. Ctrl	Module 2
ENSG00000124479	NDP	3.1238	0.0012786	0.0186691	L-TB vs. Ctrl	Module 1
ENSG00000124557	BTN1A1	2.32764	0.00260732	0.0303524	L-TB vs. Ctrl	Module 1
ENSG00000124575	HIST1H1D	2.59737	0.000781681	0.0367494	L-TB vs. AL-TB	Module 1
ENSG00000124575	HIST1H1D	4.75553	2.4464e-07	2.49116e-05	L-TB vs. Ctrl	Module 1
ENSG00000124762	CDKN1A	1.61724	0.00114989	0.0195191	AL-TB vs. Ctrl	Module 2
ENSG00000124772	CPNE5	1.97115	1.05977e-07	6.2279e-05	L-TB vs. AL-TB	Module 1
ENSG00000124772	CPNE5	2.34168	9.1517e-10	2.26682e-07	L-TB vs. Ctrl	Module 1
ENSG00000124813	RUNX2	1.66368	2.81529e-06	0.000181699	L-TB vs. Ctrl	Module 1
ENSG00000124839	RAB17	-1.75536	0.000939166	0.0149219	L-TB vs. Ctrl	Module 3
ENSG00000124882	EREG	2.09874	3.58778e-05	0.00170714	AL-TB vs. Ctrl	Module 2
ENSG00000124882	EREG	1.98235	0.000382561	0.00766785	L-TB vs. Ctrl	Module 2
ENSG00000124920	MYRF	-2.20885	5.27128e-09	1.00645e-06	L-TB vs. Ctrl	Module 3
ENSG00000125084	WNT1	2.32951	0.00283485	0.0350854	AL-TB vs. Ctrl	Module 1
ENSG00000125084	WNT1	3.48183	0.00115928	0.0173602	L-TB vs. Ctrl	Module 1
ENSG00000125245	GPR18	1.62792	0.000792456	0.0131569	L-TB vs. Ctrl	Module 1
ENSG00000125354	SEPTIN6	1.71509	1.13519e-16	3.90137e-13	L-TB vs. Ctrl	Module 1
ENSG00000125462	C1orf61	2.66049	0.000183955	0.00443266	L-TB vs. Ctrl	Module 1
ENSG00000125631	HTR5BP	2.18039	0.00178165	0.0235789	L-TB vs. Ctrl	Module 1
ENSG00000125735	TNFSF14	2.25588	9.23521e-06	0.000645761	AL-TB vs. Ctrl	Module 2
ENSG00000125740	FOSB	3.39203	1.49944e-07	1.66232e-05	L-TB vs. Ctrl	Module 2
ENSG00000125740	FOSB	3.78013	1.8426e-09	6.34546e-07	AL-TB vs. Ctrl	Module 2
ENSG00000125850	OVOL2	-1.50681	0.00267299	0.0309176	L-TB vs. Ctrl	Module 3
ENSG00000125851	PCSK2	-1.78	0.000372319	0.00902938	AL-TB vs. Ctrl	Module 3
ENSG00000125851	PCSK2	-2.72258	6.5329e-06	0.000357364	L-TB vs. Ctrl	Module 3
ENSG00000125872	LRRN4	-1.52828	0.00192542	0.0248884	L-TB vs. Ctrl	Module 2
ENSG00000125965	GDF5	-1.53611	0.00363926	0.0378291	L-TB vs. Ctrl	Module 3
ENSG00000125966	MMP24	-1.53171	2.06397e-06	0.00014258	L-TB vs. Ctrl	Module 3
ENSG00000126251	GPR42	4.43535	6.77699e-05	0.00208886	L-TB vs. Ctrl	Module 1
ENSG00000126251	GPR42	4.5942	0.00431983	0.0449948	AL-TB vs. Ctrl	Module 1
ENSG00000126353	CCR7	2.04262	4.69451e-09	9.15397e-07	L-TB vs. Ctrl	Module 1
ENSG00000126583	PRKCG	2.69226	0.000258422	0.00695266	AL-TB vs. Ctrl	Module 1
ENSG00000126583	PRKCG	3.47646	8.95822e-07	7.13905e-05	L-TB vs. Ctrl	Module 1
ENSG00000127311	HELB	1.63159	0.000872209	0.0140979	L-TB vs. Ctrl	Module 1
ENSG00000127533	F2RL3	-1.78329	0.00105425	0.016184	L-TB vs. Ctrl	Module 3
ENSG00000127561	SYNGR3	1.71135	0.00038877	0.0234827	L-TB vs. AL-TB	Module 4
ENSG00000128016	ZFP36	2.01351	1.39904e-06	0.000158954	AL-TB vs. Ctrl	Module 2
ENSG00000128016	ZFP36	1.96445	2.63308e-05	0.00103568	L-TB vs. Ctrl	Module 2
ENSG00000128218	VPREB3	6.02559	2.99479e-12	1.78997e-09	L-TB vs. Ctrl	Module 1
ENSG00000128218	VPREB3	3.91161	1.19009e-07	6.85106e-05	L-TB vs. AL-TB	Module 1
ENSG00000128268	MGAT3	-1.52859	4.19556e-07	3.88393e-05	L-TB vs. Ctrl	Module 3
ENSG00000128383	APOBEC3A	1.99888	3.16541e-05	0.00117767	L-TB vs. Ctrl	Module 2
ENSG00000128383	APOBEC3A	2.82213	7.51305e-09	2.20196e-06	AL-TB vs. Ctrl	Module 2
ENSG00000128422	KRT17	2.31072	0.000667881	0.0115344	L-TB vs. Ctrl	Module 1
ENSG00000128438	TBC1D27	4.28927	2.40628e-09	5.12855e-07	L-TB vs. Ctrl	Module 1
ENSG00000128438	TBC1D27	2.81257	1.47713e-05	0.00262056	L-TB vs. AL-TB	Module 1
ENSG00000128536	CDHR3	-1.59865	0.00250256	0.0295559	L-TB vs. Ctrl	Module 2
ENSG00000128626	MRPS12	-1.50423	0.000414955	0.0097445	AL-TB vs. Ctrl	Module 4
ENSG00000128965	CHAC1	-2.14312	0.000544197	0.011668	AL-TB vs. Ctrl	Module 4
ENSG00000129226	CD68	1.62774	0.000951324	0.0173455	AL-TB vs. Ctrl	Module 2
ENSG00000129451	KLK10	-2.24648	2.10353e-05	0.000871002	L-TB vs. Ctrl	Module 3
ENSG00000129810	SGOL1	1.74872	1.19713e-05	0.00220779	L-TB vs. AL-TB	Module 4
ENSG00000129988	LBP	-4.71303	4.21923e-07	6.24862e-05	AL-TB vs. Ctrl	Module 3
ENSG00000129988	LBP	-4.70439	1.3513e-05	0.000617096	L-TB vs. Ctrl	Module 3
ENSG00000130054	FAM155B	1.81286	0.000618877	0.0319973	L-TB vs. AL-TB	Module 4
ENSG00000130164	LDLR	1.59769	3.81121e-05	0.00177964	AL-TB vs. Ctrl	Module 2
ENSG00000130182	ZSCAN10	-3.21875	0.00325095	0.0351067	L-TB vs. Ctrl	Module 3
ENSG00000130449	ZSWIM6	1.68792	3.77305e-07	5.77487e-05	AL-TB vs. Ctrl	Module 2
ENSG00000130487	KLHDC7B	2.18836	0.000146267	0.003703	L-TB vs. Ctrl	Module 1
ENSG00000130518	KIAA1683	1.61628	4.95943e-07	7.15352e-05	AL-TB vs. Ctrl	Module 2
ENSG00000130545	CRB3	-1.88785	7.22858e-05	0.00219379	L-TB vs. Ctrl	Module 3
ENSG00000130762	ARHGEF16	-1.57497	5.32546e-05	0.00229603	AL-TB vs. Ctrl	Module 3
ENSG00000130762	ARHGEF16	-1.85173	0.000108652	0.00294894	L-TB vs. Ctrl	Module 3
ENSG00000131016	AKAP12	1.67697	1.50086e-06	0.000166728	AL-TB vs. Ctrl	Module 2
ENSG00000131196	NFATC1	1.57759	4.45246e-06	0.000377432	AL-TB vs. Ctrl	Module 2
ENSG00000131386	GALNT15	-1.50835	0.0020555	0.0285717	AL-TB vs. Ctrl	Module 4
ENSG00000132000	PODNL1	1.76497	6.15967e-05	0.00689339	L-TB vs. AL-TB	Module 4
ENSG00000132000	PODNL1	1.71153	3.33985e-05	0.00122598	L-TB vs. Ctrl	Module 4
ENSG00000132002	DNAJB1	1.91201	4.39738e-05	0.00152078	L-TB vs. Ctrl	Module 2
ENSG00000132185	FCRLA	2.9789	2.40913e-07	0.000113261	L-TB vs. AL-TB	Module 1
ENSG00000132185	FCRLA	4.43193	6.69655e-15	1.02286e-11	L-TB vs. Ctrl	Module 1
ENSG00000132259	CNGA4	-2.22884	8.17461e-05	0.00240377	L-TB vs. Ctrl	Module 3
ENSG00000132326	PER2	1.94944	4.96959e-20	9.02039e-16	AL-TB vs. Ctrl	Module 2
ENSG00000132465	IGJ	1.88577	0.000158411	0.0039415	L-TB vs. Ctrl	Module 1
ENSG00000132498	ANKRD20A3	-2.81167	4.74576e-06	0.00128616	L-TB vs. AL-TB	Module 2
ENSG00000132510	KDM6B	2.83491	2.67465e-13	7.36867e-10	AL-TB vs. Ctrl	Module 2
ENSG00000132510	KDM6B	1.82978	2.5216e-09	5.33298e-07	L-TB vs. Ctrl	Module 2
ENSG00000132681	ATP1A4	1.66781	0.00120468	0.020188	AL-TB vs. Ctrl	Module 2
ENSG00000132681	ATP1A4	2.37034	0.000154638	0.00386584	L-TB vs. Ctrl	Module 2
ENSG00000132698	RAB25	-1.58054	0.00237716	0.0285455	L-TB vs. Ctrl	Module 3
ENSG00000132702	HAPLN2	-2.07375	0.00302691	0.0363719	AL-TB vs. Ctrl	Module 3
ENSG00000132702	HAPLN2	-2.36248	0.00206021	0.0261029	L-TB vs. Ctrl	Module 3
ENSG00000132704	FCRL2	2.78039	2.99822e-08	4.43188e-06	L-TB vs. Ctrl	Module 1
ENSG00000132704	FCRL2	2.28488	2.35739e-06	0.000746255	L-TB vs. AL-TB	Module 1
ENSG00000132958	TPTE2	1.9707	0.000336669	0.0210105	L-TB vs. AL-TB	Module 1
ENSG00000132958	TPTE2	3.17133	1.46125e-07	1.62654e-05	L-TB vs. Ctrl	Module 1
ENSG00000132972	RNF17	3.84213	0.00294853	0.0330077	L-TB vs. Ctrl	Module 1
ENSG00000133110	POSTN	1.85458	0.00029814	0.00637683	L-TB vs. Ctrl	Module 1
ENSG00000133488	SEC14L4	-2.22897	7.65657e-06	0.000399993	L-TB vs. Ctrl	Module 3
ENSG00000133808	MICALCL	-1.65806	0.000105302	0.00953708	L-TB vs. AL-TB	Module 2
ENSG00000134028	ADAMDEC1	1.60767	0.00356886	0.0400661	AL-TB vs. Ctrl	Module 1
ENSG00000134028	ADAMDEC1	5.12356	6.69188e-11	2.48631e-08	L-TB vs. Ctrl	Module 1
ENSG00000134028	ADAMDEC1	3.43977	1.4264e-07	7.7377e-05	L-TB vs. AL-TB	Module 1
ENSG00000134061	CD180	1.60265	1.26664e-07	1.45711e-05	L-TB vs. Ctrl	Module 1
ENSG00000134107	BHLHE40	1.62329	9.56833e-05	0.00268167	L-TB vs. Ctrl	Module 2
ENSG00000134107	BHLHE40	1.61603	3.31098e-05	0.00161161	AL-TB vs. Ctrl	Module 2
ENSG00000134242	PTPN22	1.67913	3.03004e-05	0.00151004	AL-TB vs. Ctrl	Module 1
ENSG00000134242	PTPN22	1.6827	1.89335e-05	0.000804572	L-TB vs. Ctrl	Module 1
ENSG00000134460	IL2RA	2.7227	8.1957e-10	2.04848e-07	L-TB vs. Ctrl	Module 1
ENSG00000134460	IL2RA	1.56517	0.000170163	0.00516857	AL-TB vs. Ctrl	Module 1
ENSG00000134531	EMP1	2.68576	2.97194e-11	3.55986e-08	AL-TB vs. Ctrl	Module 2
ENSG00000134531	EMP1	2.32347	7.33002e-08	9.33016e-06	L-TB vs. Ctrl	Module 2
ENSG00000134955	SLC37A2	1.71129	0.00290299	0.0327051	L-TB vs. Ctrl	Module 4
ENSG00000135094	SDS	2.2006	0.000172304	0.00421721	L-TB vs. Ctrl	Module 1
ENSG00000135333	EPHA7	-2.08609	0.0010017	0.0428394	L-TB vs. AL-TB	Module 2
ENSG00000135477	KRT121P	1.79778	0.00361106	0.0404081	AL-TB vs. Ctrl	Module 2
ENSG00000135480	KRT7	-2.40581	7.23357e-05	0.00219379	L-TB vs. Ctrl	Module 3
ENSG00000135480	KRT7	-1.54286	0.000265751	0.00708069	AL-TB vs. Ctrl	Module 3
ENSG00000135914	HTR2B	-1.57753	0.000448088	0.0102192	AL-TB vs. Ctrl	Module 4
ENSG00000135914	HTR2B	2.63179	3.4834e-06	0.00101299	L-TB vs. AL-TB	Module 4
ENSG00000135919	SERPINE2	1.68999	3.55184e-05	0.00128831	L-TB vs. Ctrl	Module 1
ENSG00000135919	SERPINE2	1.60415	1.63246e-05	0.00282506	L-TB vs. AL-TB	Module 1
ENSG00000135925	WNT10A	1.61903	0.000381641	0.00765901	L-TB vs. Ctrl	Module 1
ENSG00000136002	ARHGEF4	-1.71692	1.73784e-05	0.000756014	L-TB vs. Ctrl	Module 3
ENSG00000136155	SCEL	-1.79043	0.000135341	0.0113961	L-TB vs. AL-TB	Module 2
ENSG00000136155	SCEL	-1.50857	0.00422091	0.0419103	L-TB vs. Ctrl	Module 2
ENSG00000136235	GPNMB	1.69346	0.000376444	0.00758238	L-TB vs. Ctrl	Module 1
ENSG00000136244	IL6	3.41555	7.4817e-07	9.90966e-05	AL-TB vs. Ctrl	Module 2
ENSG00000136244	IL6	2.83733	0.000182401	0.00440292	L-TB vs. Ctrl	Module 2
ENSG00000136352	NKX2-1	-1.69161	0.000105037	0.00287066	L-TB vs. Ctrl	Module 3
ENSG00000136573	BLK	3.6569	7.37847e-11	2.70485e-08	L-TB vs. Ctrl	Module 1
ENSG00000136573	BLK	3.09119	6.03702e-08	3.96028e-05	L-TB vs. AL-TB	Module 1
ENSG00000136634	IL10	1.55849	0.00221059	0.0273775	L-TB vs. Ctrl	Module 1
ENSG00000136697	IL1F10	-3.61616	0.000956217	0.0415608	L-TB vs. AL-TB	Module 3
ENSG00000136826	KLF4	1.83058	3.20057e-07	5.09686e-05	AL-TB vs. Ctrl	Module 2
ENSG00000136883	KIF12	-1.60692	4.65008e-05	0.00205304	AL-TB vs. Ctrl	Module 3
ENSG00000136883	KIF12	-1.9729	2.14916e-05	0.000887223	L-TB vs. Ctrl	Module 3
ENSG00000136997	MYC	2.24359	2.2178e-06	0.000151306	L-TB vs. Ctrl	Module 1
ENSG00000136997	MYC	2.00842	6.50167e-06	0.000506004	AL-TB vs. Ctrl	Module 1
ENSG00000137265	IRF4	1.65054	1.01123e-09	3.86936e-07	AL-TB vs. Ctrl	Module 1
ENSG00000137265	IRF4	2.51542	1.12407e-15	2.37732e-12	L-TB vs. Ctrl	Module 1
ENSG00000137337	MDC1	1.83927	0.00422025	0.0419103	L-TB vs. Ctrl	Module 1
ENSG00000137571	SLCO5A1	1.68214	0.000136009	0.00350792	L-TB vs. Ctrl	Module 1
ENSG00000137573	SULF1	2.0761	8.52073e-10	9.6141e-07	L-TB vs. AL-TB	Module 1
ENSG00000137573	SULF1	2.00804	3.72564e-06	0.000226982	L-TB vs. Ctrl	Module 1
ENSG00000137634	NXPE4	3.15743	0.000110457	0.00297736	L-TB vs. Ctrl	Module 1
ENSG00000137745	MMP13	3.23973	0.00329503	0.0354296	L-TB vs. Ctrl	Module 1
ENSG00000137809	ITGA11	2.75313	1.84009e-07	1.98398e-05	L-TB vs. Ctrl	Module 1
ENSG00000137809	ITGA11	2.63503	1.42194e-08	1.25344e-05	L-TB vs. AL-TB	Module 1
ENSG00000137825	ITPKA	-2.07249	0.000832202	0.0158009	AL-TB vs. Ctrl	Module 4
ENSG00000137834	SMAD6	-1.65029	6.88903e-05	0.00211392	L-TB vs. Ctrl	Module 3
ENSG00000137843	PAK6	-1.53265	0.00113098	0.0171067	L-TB vs. Ctrl	Module 3
ENSG00000137857	DUOX1	-1.54733	5.81065e-05	0.00245151	AL-TB vs. Ctrl	Module 3
ENSG00000137857	DUOX1	-2.12705	1.34957e-05	0.000617096	L-TB vs. Ctrl	Module 3
ENSG00000137868	STRA6	3.19574	5.14616e-05	0.0062841	L-TB vs. AL-TB	Module 4
ENSG00000137868	STRA6	4.39094	2.69528e-10	7.71918e-08	L-TB vs. Ctrl	Module 4
ENSG00000137869	CYP19A1	-2.4185	0.000284805	0.00745096	AL-TB vs. Ctrl	Module 4
ENSG00000137869	CYP19A1	1.8412	0.000744898	0.0356742	L-TB vs. AL-TB	Module 4
ENSG00000137875	BCL2L10	4.57331	0.000106123	0.00289658	L-TB vs. Ctrl	Module 1
ENSG00000137976	DNASE2B	1.90031	0.00321777	0.0348717	L-TB vs. Ctrl	Module 1
ENSG00000138135	CH25H	1.97932	6.99474e-05	0.00278879	AL-TB vs. Ctrl	Module 2
ENSG00000138135	CH25H	2.09744	8.50188e-05	0.00246573	L-TB vs. Ctrl	Module 2
ENSG00000138166	DUSP5	2.1173	9.19268e-07	7.23433e-05	L-TB vs. Ctrl	Module 1
ENSG00000138166	DUSP5	1.69351	9.09703e-05	0.00336407	AL-TB vs. Ctrl	Module 1
ENSG00000138316	ADAMTS14	2.19851	7.97791e-05	0.00806598	L-TB vs. AL-TB	Module 4
ENSG00000138435	CHRNA1	2.2685	0.00176164	0.0234209	L-TB vs. Ctrl	Module 1
ENSG00000138483	CCDC54	-3.3097	0.00318494	0.0346387	L-TB vs. Ctrl	Module 3
ENSG00000138615	CILP	2.89913	4.9417e-06	0.000283647	L-TB vs. Ctrl	Module 4
ENSG00000138615	CILP	3.49514	1.16522e-09	1.26418e-06	L-TB vs. AL-TB	Module 4
ENSG00000138650	PCDH10	-1.76962	8.02303e-05	0.00808263	L-TB vs. AL-TB	Module 2
ENSG00000138755	CXCL9	3.73538	1.25879e-10	6.20976e-08	AL-TB vs. Ctrl	Module 1
ENSG00000138755	CXCL9	3.19063	1.09243e-06	8.36639e-05	L-TB vs. Ctrl	Module 1
ENSG00000138772	ANXA3	-1.56513	3.27767e-06	0.000973228	L-TB vs. AL-TB	Module 3
ENSG00000138772	ANXA3	-1.64549	9.89388e-06	0.000484889	L-TB vs. Ctrl	Module 3
ENSG00000138795	LEF1	2.17526	2.14754e-10	6.21519e-08	L-TB vs. Ctrl	Module 1
ENSG00000138798	EGF	-1.92336	0.000513186	0.00950738	L-TB vs. Ctrl	Module 3
ENSG00000138944	KIAA1644	1.855	0.00126306	0.0185025	L-TB vs. Ctrl	Module 4
ENSG00000139044	B4GALNT3	-1.71498	0.000811815	0.013407	L-TB vs. Ctrl	Module 3
ENSG00000139193	CD27	3.22084	6.44289e-13	5.21003e-10	L-TB vs. Ctrl	Module 1
ENSG00000139193	CD27	1.86332	5.23638e-06	0.00138045	L-TB vs. AL-TB	Module 1
ENSG00000139194	RBP5	1.86215	9.8615e-12	4.82531e-09	L-TB vs. Ctrl	Module 1
ENSG00000139289	PHLDA1	1.53024	8.22735e-06	0.000599639	AL-TB vs. Ctrl	Module 2
ENSG00000139318	DUSP6	1.55617	5.64925e-10	2.32294e-07	AL-TB vs. Ctrl	Module 2
ENSG00000139767	SRRM4	-2.39036	0.000114408	0.0101167	L-TB vs. AL-TB	Module 2
ENSG00000139908	TSSK4	1.69469	0.000453252	0.00870232	L-TB vs. Ctrl	Module 2
ENSG00000139908	TSSK4	1.63611	0.000285268	0.00745096	AL-TB vs. Ctrl	Module 2
ENSG00000140057	AK7	-1.57175	2.01207e-05	0.0032248	L-TB vs. AL-TB	Module 3
ENSG00000140254	DUOXA1	-2.04373	0.000128153	0.00335245	L-TB vs. Ctrl	Module 3
ENSG00000140287	HDC	1.66407	0.00028692	0.00622129	L-TB vs. Ctrl	Module 2
ENSG00000140287	HDC	1.88129	1.24716e-06	0.00014621	AL-TB vs. Ctrl	Module 2
ENSG00000140511	HAPLN3	1.71529	4.55131e-05	0.00155833	L-TB vs. Ctrl	Module 1
ENSG00000140557	ST8SIA2	3.82361	3.33155e-05	0.00122457	L-TB vs. Ctrl	Module 1
ENSG00000140557	ST8SIA2	2.53894	0.000565987	0.0300101	L-TB vs. AL-TB	Module 1
ENSG00000140873	ADAMTS18	3.5421	0.000275483	0.00602076	L-TB vs. Ctrl	Module 1
ENSG00000140873	ADAMTS18	3.05139	2.20332e-05	0.00341491	L-TB vs. AL-TB	Module 1
ENSG00000141150	RASL10B	-1.83303	0.000274706	0.00600858	L-TB vs. Ctrl	Module 3
ENSG00000141433	ADCYAP1	2.73594	0.000294351	0.00632751	L-TB vs. Ctrl	Module 1
ENSG00000141485	SLC13A5	1.93636	0.00108603	0.0448296	L-TB vs. AL-TB	Module 4
ENSG00000141639	MAPK4	-1.62593	3.31886e-06	0.000975193	L-TB vs. AL-TB	Module 2
ENSG00000141639	MAPK4	-1.6942	0.000229376	0.00525539	L-TB vs. Ctrl	Module 2
ENSG00000141682	PMAIP1	1.75417	1.37093e-07	2.56932e-05	AL-TB vs. Ctrl	Module 2
ENSG00000141682	PMAIP1	1.5182	2.33619e-05	0.000944576	L-TB vs. Ctrl	Module 2
ENSG00000141738	GRB7	-1.72595	0.000363784	0.00740879	L-TB vs. Ctrl	Module 3
ENSG00000141744	PNMT	-2.24201	0.000661209	0.013398	AL-TB vs. Ctrl	Module 3
ENSG00000141744	PNMT	-2.90852	5.12931e-05	0.00169095	L-TB vs. Ctrl	Module 3
ENSG00000141837	CACNA1A	1.50254	0.000153541	0.00384468	L-TB vs. Ctrl	Module 1
ENSG00000142235	LMTK3	-1.57091	0.00276502	0.0316097	L-TB vs. Ctrl	Module 3
ENSG00000142396	ERVK3-1	1.62154	3.66758e-08	7.95605e-06	AL-TB vs. Ctrl	Module 2
ENSG00000142408	CACNG8	1.56962	0.0012877	0.0187614	L-TB vs. Ctrl	Module 1
ENSG00000142449	FBN3	-1.8533	0.00151763	0.0211397	L-TB vs. Ctrl	Module 3
ENSG00000142583	SLC2A5	3.36187	9.15415e-12	4.66082e-09	L-TB vs. Ctrl	Module 1
ENSG00000142583	SLC2A5	2.25258	1.53214e-05	0.00268439	L-TB vs. AL-TB	Module 1
ENSG00000142609	C1orf222	-2.06331	0.00232435	0.0281522	L-TB vs. Ctrl	Module 3
ENSG00000142675	CNKSR1	-1.52591	0.000209095	0.00491355	L-TB vs. Ctrl	Module 3
ENSG00000142748	FCN3	-2.39395	0.000469668	0.0089117	L-TB vs. Ctrl	Module 3
ENSG00000142920	ADC	1.52277	3.80024e-06	0.000230141	L-TB vs. Ctrl	Module 1
ENSG00000142973	CYP4B1	-1.63696	0.00108194	0.0165168	L-TB vs. Ctrl	Module 3
ENSG00000143001	TMEM61	-2.50132	0.000294152	0.00632751	L-TB vs. Ctrl	Module 3
ENSG00000143297	FCRL5	2.72588	1.72054e-07	8.82417e-05	L-TB vs. AL-TB	Module 1
ENSG00000143297	FCRL5	3.62728	1.28308e-11	5.97916e-09	L-TB vs. Ctrl	Module 1
ENSG00000143320	CRABP2	1.67723	0.00130766	0.0189691	L-TB vs. Ctrl	Module 4
ENSG00000143320	CRABP2	1.65159	0.00110125	0.0453489	L-TB vs. AL-TB	Module 4
ENSG00000143384	MCL1	1.58761	3.1324e-14	1.23282e-10	AL-TB vs. Ctrl	Module 2
ENSG00000143387	CTSK	1.67605	8.12353e-06	0.00179022	L-TB vs. AL-TB	Module 1
ENSG00000143387	CTSK	1.65756	0.00013362	0.00346579	L-TB vs. Ctrl	Module 1
ENSG00000143479	DYRK3	1.83002	3.74166e-10	1.63623e-07	AL-TB vs. Ctrl	Module 2
ENSG00000143851	PTPN7	1.55632	8.05728e-07	6.63254e-05	L-TB vs. Ctrl	Module 1
ENSG00000144278	GALNT13	1.58198	0.000231377	0.00647807	AL-TB vs. Ctrl	Module 2
ENSG00000144485	HES6	-1.61255	0.00288743	0.0354653	AL-TB vs. Ctrl	Module 4
ENSG00000144596	GRIP2	2.28932	1.68624e-06	0.000573077	L-TB vs. AL-TB	Module 4
ENSG00000144802	NFKBIZ	1.65759	1.65228e-06	0.000179213	AL-TB vs. Ctrl	Module 2
ENSG00000144908	ALDH1L1	-1.80521	0.000661946	0.0114607	L-TB vs. Ctrl	Module 4
ENSG00000144908	ALDH1L1	-2.61086	1.36867e-05	0.000857116	AL-TB vs. Ctrl	Module 4
ENSG00000145194	ECE2	-1.80372	0.00012422	0.00420943	AL-TB vs. Ctrl	Module 4
ENSG00000145358	DDIT4L	-1.51396	0.00369596	0.0408602	AL-TB vs. Ctrl	Module 4
ENSG00000145358	DDIT4L	1.63484	5.29447e-05	0.00632606	L-TB vs. AL-TB	Module 4
ENSG00000145414	NAF1	1.68592	2.148e-05	0.000887223	L-TB vs. Ctrl	Module 2
ENSG00000145414	NAF1	2.32185	3.37534e-07	5.28357e-05	AL-TB vs. Ctrl	Module 2
ENSG00000145423	SFRP2	1.5584	0.00107294	0.0445309	L-TB vs. AL-TB	Module 1
ENSG00000145536	ADAMTS16	2.3994	0.000435774	0.0251189	L-TB vs. AL-TB	Module 1
ENSG00000145824	CXCL14	1.76721	0.000122441	0.00321835	L-TB vs. Ctrl	Module 1
ENSG00000145824	CXCL14	1.7603	0.00236326	0.0313772	AL-TB vs. Ctrl	Module 1
ENSG00000146070	PLA2G7	2.06931	3.59119e-07	3.42834e-05	L-TB vs. Ctrl	Module 1
ENSG00000146221	TCTE1	-2.28689	2.27905e-05	0.000928298	L-TB vs. Ctrl	Module 3
ENSG00000146592	CREB5	2.21978	8.62473e-11	6.20976e-08	AL-TB vs. Ctrl	Module 2
ENSG00000146666	LINC00525	2.54942	0.00036532	0.0223534	L-TB vs. AL-TB	Module 1
ENSG00000146666	LINC00525	2.42793	0.00262095	0.0304953	L-TB vs. Ctrl	Module 1
ENSG00000146938	NLGN4X	2.16907	1.88837e-05	0.000804572	L-TB vs. Ctrl	Module 1
ENSG00000147059	SPIN2A	2.0426	0.000542326	0.00988774	L-TB vs. Ctrl	Module 1
ENSG00000147168	IL2RG	1.55266	8.27174e-09	1.47677e-06	L-TB vs. Ctrl	Module 1
ENSG00000147465	STAR	2.15038	0.00115315	0.0173215	L-TB vs. Ctrl	Module 2
ENSG00000147488	ST18	2.85402	1.12599e-05	0.000531925	L-TB vs. Ctrl	Module 1
ENSG00000147570	DNAJC5B	1.93307	3.77956e-06	0.000229393	L-TB vs. Ctrl	Module 1
ENSG00000147573	TRIM55	1.78693	0.00233328	0.0282231	L-TB vs. Ctrl	Module 1
ENSG00000147614	ATP6V0D2	1.60341	0.00219426	0.0272735	L-TB vs. Ctrl	Module 1
ENSG00000148339	SLC25A25	1.53647	0.000573269	0.0102882	L-TB vs. Ctrl	Module 2
ENSG00000148339	SLC25A25	1.94022	4.59204e-06	0.000385703	AL-TB vs. Ctrl	Module 2
ENSG00000148604	RGR	-2.58042	0.00528932	0.0488822	L-TB vs. Ctrl	Module 3
ENSG00000148680	HTR7	1.80045	0.000165476	0.0131485	L-TB vs. AL-TB	Module 4
ENSG00000148773	MKI67	1.50843	8.60666e-06	0.000437396	L-TB vs. Ctrl	Module 1
ENSG00000148848	ADAM12	3.25728	1.20464e-11	5.71043e-09	L-TB vs. Ctrl	Module 1
ENSG00000148848	ADAM12	2.06931	5.89462e-06	0.00144843	L-TB vs. AL-TB	Module 1
ENSG00000148948	LRRC4C	1.53666	0.000358209	0.00880343	AL-TB vs. Ctrl	Module 1
ENSG00000149043	SYT8	-2.15753	0.000732762	0.01443	AL-TB vs. Ctrl	Module 3
ENSG00000149054	ZNF215	1.89126	2.42863e-08	3.66884e-06	L-TB vs. Ctrl	Module 1
ENSG00000149243	KLHL35	-1.50978	5.38318e-05	0.00176828	L-TB vs. Ctrl	Module 3
ENSG00000149346	SLX4IP	1.57467	0.000456216	0.00871661	L-TB vs. Ctrl	Module 1
ENSG00000149380	P4HA3	1.50571	3.5629e-05	0.00128975	L-TB vs. Ctrl	Module 1
ENSG00000149435	GGTLC1	-1.82379	0.00528059	0.0488277	L-TB vs. Ctrl	Module 3
ENSG00000149634	SPATA25	-1.52281	0.000871258	0.0163509	AL-TB vs. Ctrl	Module 4
ENSG00000149948	HMGA2	2.12437	0.0023044	0.028059	L-TB vs. Ctrl	Module 1
ENSG00000149968	MMP3	3.96415	2.17251e-06	0.000148955	L-TB vs. Ctrl	Module 1
ENSG00000150201	FXYD4	-2.16346	0.001969	0.0253208	L-TB vs. Ctrl	Module 3
ENSG00000150347	ARID5B	1.50068	1.95693e-06	0.000136905	L-TB vs. Ctrl	Module 1
ENSG00000151014	CCRN4L	1.61619	3.98435e-06	0.000346681	AL-TB vs. Ctrl	Module 2
ENSG00000151136	BTBD11	1.72117	2.4962e-06	0.000165375	L-TB vs. Ctrl	Module 1
ENSG00000151224	MAT1A	-2.55146	0.000926512	0.0147758	L-TB vs. Ctrl	Module 3
ENSG00000151789	ZNF385D	1.68513	5.02955e-05	0.00166779	L-TB vs. Ctrl	Module 1
ENSG00000151790	TDO2	2.1348	0.000455908	0.00871661	L-TB vs. Ctrl	Module 1
ENSG00000151838	CCDC175	3.88824	0.0022353	0.0302637	AL-TB vs. Ctrl	Module 2
ENSG00000151917	BEND6	1.52445	6.59381e-05	0.00204386	L-TB vs. Ctrl	Module 1
ENSG00000151929	BAG3	1.53318	1.36655e-05	0.000857116	AL-TB vs. Ctrl	Module 2
ENSG00000151929	BAG3	1.71025	5.00397e-05	0.00166763	L-TB vs. Ctrl	Module 2
ENSG00000152049	KCNE4	1.74133	1.98566e-05	0.000830957	L-TB vs. Ctrl	Module 1
ENSG00000152207	CYSLTR2	1.98924	0.000642167	0.0111816	L-TB vs. Ctrl	Module 2
ENSG00000152207	CYSLTR2	2.2101	0.000147731	0.00468413	AL-TB vs. Ctrl	Module 2
ENSG00000152256	PDK1	1.88093	3.60997e-10	1.00255e-07	L-TB vs. Ctrl	Module 1
ENSG00000152766	ANKRD22	1.98922	0.000571562	0.0102673	L-TB vs. Ctrl	Module 1
ENSG00000152932	RAB3C	1.74827	0.000105518	0.00953708	L-TB vs. AL-TB	Module 1
ENSG00000152932	RAB3C	1.90446	0.00116902	0.0174585	L-TB vs. Ctrl	Module 1
ENSG00000152936	IFLTD1	-3.59102	0.00079888	0.0372476	L-TB vs. AL-TB	Module 2
ENSG00000153012	LGI2	1.93865	4.58536e-07	0.000195976	L-TB vs. AL-TB	Module 1
ENSG00000153012	LGI2	2.21591	2.01235e-07	2.11174e-05	L-TB vs. Ctrl	Module 1
ENSG00000153086	ACMSD	1.86528	0.00239201	0.0316521	AL-TB vs. Ctrl	Module 2
ENSG00000153234	NR4A2	3.0149	1.07951e-12	8.02163e-10	L-TB vs. Ctrl	Module 2
ENSG00000153234	NR4A2	2.98532	4.9566e-14	1.70693e-10	AL-TB vs. Ctrl	Module 2
ENSG00000153283	CD96	1.83814	6.65724e-09	1.23672e-06	L-TB vs. Ctrl	Module 1
ENSG00000153815	CMIP	1.51331	5.10686e-13	4.38775e-10	L-TB vs. Ctrl	Module 1
ENSG00000153922	CHD1	1.70391	3.13832e-10	1.41739e-07	AL-TB vs. Ctrl	Module 2
ENSG00000154027	AK5	1.84795	0.00072977	0.0123701	L-TB vs. Ctrl	Module 1
ENSG00000154027	AK5	1.58484	0.00269415	0.0340632	AL-TB vs. Ctrl	Module 1
ENSG00000154096	THY1	1.74755	1.96811e-05	0.000824868	L-TB vs. Ctrl	Module 1
ENSG00000154198	CYP4Z2P	-1.77388	0.00135689	0.0194507	L-TB vs. Ctrl	Module 3
ENSG00000154252	GAL3ST2	3.69858	0.00198205	0.0254172	L-TB vs. Ctrl	Module 1
ENSG00000154319	FAM167A	-1.5265	7.13621e-06	0.000380977	L-TB vs. Ctrl	Module 3
ENSG00000154451	GBP5	2.07643	1.11855e-05	0.000530233	L-TB vs. Ctrl	Module 1
ENSG00000154611	PSMA8	3.61964	0.000133263	0.0112885	L-TB vs. AL-TB	Module 4
ENSG00000154734	ADAMTS1	1.64545	9.71127e-06	0.000478435	L-TB vs. Ctrl	Module 1
ENSG00000154764	WNT7A	-1.86807	1.37287e-05	0.000624926	L-TB vs. Ctrl	Module 3
ENSG00000155090	KLF10	1.75509	1.04141e-11	1.36623e-08	AL-TB vs. Ctrl	Module 2
ENSG00000155307	SAMSN1	1.77769	8.487e-06	0.000612086	AL-TB vs. Ctrl	Module 1
ENSG00000155307	SAMSN1	1.71535	3.95767e-06	0.000237581	L-TB vs. Ctrl	Module 1
ENSG00000155761	SPAG17	-2.55055	0.000189301	0.0143423	L-TB vs. AL-TB	Module 3
ENSG00000155761	SPAG17	-1.69088	0.00381261	0.0390757	L-TB vs. Ctrl	Module 3
ENSG00000155792	DEPTOR	1.57335	0.000110363	0.00297736	L-TB vs. Ctrl	Module 4
ENSG00000155792	DEPTOR	1.70235	1.03055e-05	0.00200538	L-TB vs. AL-TB	Module 4
ENSG00000156234	CXCL13	5.35526	6.50079e-15	1.02286e-11	L-TB vs. Ctrl	Module 1
ENSG00000156234	CXCL13	3.46107	1.42702e-05	0.000885457	AL-TB vs. Ctrl	Module 1
ENSG00000156395	SORCS3	4.12407	0.00240073	0.0287481	L-TB vs. Ctrl	Module 1
ENSG00000156510	HKDC1	-1.80443	0.00019803	0.00471805	L-TB vs. Ctrl	Module 3
ENSG00000156510	HKDC1	-1.6297	5.30109e-05	0.0022927	AL-TB vs. Ctrl	Module 3
ENSG00000156574	NODAL	2.46064	0.0002913	0.00756957	AL-TB vs. Ctrl	Module 2
ENSG00000156687	UNC5D	4.22002	0.00497565	0.0490795	AL-TB vs. Ctrl	Module 2
ENSG00000156738	MS4A1	4.98946	1.17648e-24	3.23463e-20	L-TB vs. Ctrl	Module 1
ENSG00000156738	MS4A1	3.04555	1.56459e-07	2.87363e-05	AL-TB vs. Ctrl	Module 1
ENSG00000156738	MS4A1	1.95269	0.000784321	0.0367511	L-TB vs. AL-TB	Module 1
ENSG00000157087	ATP2B2	2.61712	0.000100123	0.00277678	L-TB vs. Ctrl	Module 1
ENSG00000157150	TIMP4	-3.69381	9.48531e-09	2.6396e-06	AL-TB vs. Ctrl	Module 4
ENSG00000157150	TIMP4	-2.71451	6.30701e-05	0.00198859	L-TB vs. Ctrl	Module 4
ENSG00000157423	HYDIN	-1.79428	0.000784305	0.0130452	L-TB vs. Ctrl	Module 3
ENSG00000157927	RADIL	-1.56922	4.26311e-05	0.00148605	L-TB vs. Ctrl	Module 3
ENSG00000158050	DUSP2	1.8838	0.000745777	0.0125563	L-TB vs. Ctrl	Module 1
ENSG00000158164	TMSB15A	-1.74398	0.00193104	0.0249493	L-TB vs. Ctrl	Module 3
ENSG00000158246	FAM46B	-1.6994	0.000781261	0.0130103	L-TB vs. Ctrl	Module 3
ENSG00000158486	DNAH3	-2.2455	0.000175044	0.0136809	L-TB vs. AL-TB	Module 3
ENSG00000158486	DNAH3	-2.16364	9.78573e-05	0.00273146	L-TB vs. Ctrl	Module 3
ENSG00000158517	NCF1	1.63981	5.03733e-05	0.00166779	L-TB vs. Ctrl	Module 1
ENSG00000158525	CPA5	3.10597	0.00199397	0.0255106	L-TB vs. Ctrl	Module 1
ENSG00000158615	PPP1R15B	1.61734	5.45928e-09	1.67115e-06	AL-TB vs. Ctrl	Module 2
ENSG00000158764	ITLN2	-2.15588	0.000643867	0.0112041	L-TB vs. Ctrl	Module 3
ENSG00000158825	CDA	1.55631	0.00131407	0.0190253	L-TB vs. Ctrl	Module 1
ENSG00000159167	STC1	2.63136	5.96099e-08	1.20754e-05	AL-TB vs. Ctrl	Module 2
ENSG00000159167	STC1	1.93052	7.76461e-05	0.00230291	L-TB vs. Ctrl	Module 2
ENSG00000159261	CLDN14	2.35409	9.17554e-06	0.00193152	L-TB vs. AL-TB	Module 4
ENSG00000159339	PADI4	2.38466	0.000537411	0.0115669	AL-TB vs. Ctrl	Module 2
ENSG00000159387	IRX6	-1.97025	0.000101016	0.00277733	L-TB vs. Ctrl	Module 3
ENSG00000159387	IRX6	-1.88618	8.35119e-06	0.000607059	AL-TB vs. Ctrl	Module 3
ENSG00000159450	TCHH	1.56895	0.000315078	0.00664113	L-TB vs. Ctrl	Module 1
ENSG00000159648	TEPP	-2.06255	0.00017766	0.00431501	L-TB vs. Ctrl	Module 3
ENSG00000159958	TNFRSF13C	1.90896	0.00455443	0.0467034	AL-TB vs. Ctrl	Module 1
ENSG00000159958	TNFRSF13C	2.33552	4.59949e-05	0.0058707	L-TB vs. AL-TB	Module 1
ENSG00000159958	TNFRSF13C	4.24712	1.78674e-10	5.38985e-08	L-TB vs. Ctrl	Module 1
ENSG00000160161	CILP2	2.70996	0.00040059	0.0236399	L-TB vs. AL-TB	Module 1
ENSG00000160161	CILP2	3.68284	1.13362e-05	0.000533694	L-TB vs. Ctrl	Module 1
ENSG00000160200	CBS	-2.01358	3.06899e-07	3.00425e-05	L-TB vs. Ctrl	Module 3
ENSG00000160200	CBS	-1.69498	2.00271e-05	0.0011444	AL-TB vs. Ctrl	Module 3
ENSG00000160401	C9orf117	-2.37297	0.00011585	0.00308343	L-TB vs. Ctrl	Module 3
ENSG00000160606	TLCD1	-1.63815	0.000182585	0.00544927	AL-TB vs. Ctrl	Module 3
ENSG00000160606	TLCD1	-1.51386	0.00234609	0.0283272	L-TB vs. Ctrl	Module 3
ENSG00000160785	SLC25A44	1.6626	1.52506e-08	3.75652e-06	AL-TB vs. Ctrl	Module 2
ENSG00000160789	LMNA	1.63719	1.29024e-05	0.000828582	AL-TB vs. Ctrl	Module 2
ENSG00000160856	FCRL3	2.69557	2.41971e-11	1.05599e-08	L-TB vs. Ctrl	Module 1
ENSG00000161179	YDJC	-1.57531	0.00129511	0.0212131	AL-TB vs. Ctrl	Module 4
ENSG00000161270	NPHS1	2.94951	0.00260462	0.0303524	L-TB vs. Ctrl	Module 1
ENSG00000161405	IKZF3	1.83571	0.0050248	0.0494335	AL-TB vs. Ctrl	Module 1
ENSG00000161405	IKZF3	2.38246	0.00037226	0.00752567	L-TB vs. Ctrl	Module 1
ENSG00000161594	KLHL10	-2.28194	3.87429e-05	0.001378	L-TB vs. Ctrl	Module 3
ENSG00000161594	KLHL10	-1.73399	0.00164889	0.0249159	AL-TB vs. Ctrl	Module 3
ENSG00000161609	CCDC155	-2.68205	0.000655459	0.013317	AL-TB vs. Ctrl	Module 4
ENSG00000161681	SHANK1	1.98004	0.000110701	0.002981	L-TB vs. Ctrl	Module 1
ENSG00000161798	AQP5	-1.78604	0.000258327	0.00695266	AL-TB vs. Ctrl	Module 3
ENSG00000161896	IP6K3	-2.02107	1.81531e-05	0.000779844	L-TB vs. Ctrl	Module 3
ENSG00000162004	CCDC78	-1.84464	0.00261195	0.0334227	AL-TB vs. Ctrl	Module 3
ENSG00000162006	MSLNL	-3.19831	1.31126e-05	0.000602873	L-TB vs. Ctrl	Module 3
ENSG00000162006	MSLNL	-2.21233	0.00111386	0.0191315	AL-TB vs. Ctrl	Module 3
ENSG00000162040	HS3ST6	-2.72928	0.00264696	0.0336675	AL-TB vs. Ctrl	Module 3
ENSG00000162062	C16orf59	-2.07237	0.000127925	0.00430321	AL-TB vs. Ctrl	Module 4
ENSG00000162069	CCDC64B	-1.75063	0.00086932	0.0140677	L-TB vs. Ctrl	Module 3
ENSG00000162365	CYP4A22	-2.27113	0.00118599	0.0176448	L-TB vs. Ctrl	Module 3
ENSG00000162594	IL23R	2.83201	0.0010285	0.015913	L-TB vs. Ctrl	Module 1
ENSG00000162692	VCAM1	2.1036	2.46185e-05	0.00131188	AL-TB vs. Ctrl	Module 1
ENSG00000162692	VCAM1	2.53729	5.50547e-09	1.04391e-06	L-TB vs. Ctrl	Module 1
ENSG00000162711	NLRP3	2.34662	8.6342e-09	1.53154e-06	L-TB vs. Ctrl	Module 1
ENSG00000162711	NLRP3	1.99007	1.22334e-08	3.18129e-06	AL-TB vs. Ctrl	Module 1
ENSG00000162739	SLAMF6	1.72222	1.87156e-07	2.01002e-05	L-TB vs. Ctrl	Module 1
ENSG00000162746	FCRLB	1.96807	4.20281e-05	0.00553208	L-TB vs. AL-TB	Module 4
ENSG00000162753	SLC9C2	-2.00015	0.00357522	0.0373185	L-TB vs. Ctrl	Module 3
ENSG00000162772	ATF3	2.41438	7.36553e-08	9.33217e-06	L-TB vs. Ctrl	Module 2
ENSG00000162772	ATF3	2.75666	3.30294e-11	3.7915e-08	AL-TB vs. Ctrl	Module 2
ENSG00000162843	WDR64	4.19445	8.47517e-05	0.00322056	AL-TB vs. Ctrl	Module 2
ENSG00000162843	WDR64	3.2348	0.00101743	0.0157803	L-TB vs. Ctrl	Module 2
ENSG00000162849	KIF26B	2.15622	2.9496e-07	0.000134198	L-TB vs. AL-TB	Module 4
ENSG00000162878	PKDCC	-1.97872	2.71165e-08	4.05185e-06	L-TB vs. Ctrl	Module 3
ENSG00000162892	IL24	1.54222	0.000538948	0.00985229	L-TB vs. Ctrl	Module 1
ENSG00000162894	FAIM3	1.7374	1.77923e-07	3.18297e-05	AL-TB vs. Ctrl	Module 1
ENSG00000162894	FAIM3	2.858	2.48936e-14	3.11102e-11	L-TB vs. Ctrl	Module 1
ENSG00000162897	FCAMR	3.20281	0.00120998	0.017898	L-TB vs. Ctrl	Module 1
ENSG00000162897	FCAMR	2.56713	0.000867935	0.0388614	L-TB vs. AL-TB	Module 1
ENSG00000162924	REL	2.29908	4.72836e-10	2.03541e-07	AL-TB vs. Ctrl	Module 2
ENSG00000162924	REL	1.76365	7.68152e-08	9.55637e-06	L-TB vs. Ctrl	Module 2
ENSG00000163132	MSX1	1.50924	0.00329444	0.0382316	AL-TB vs. Ctrl	Module 2
ENSG00000163283	ALPP	-2.43953	6.35772e-06	0.000499018	AL-TB vs. Ctrl	Module 3
ENSG00000163283	ALPP	-4.05672	3.80479e-11	1.47337e-08	L-TB vs. Ctrl	Module 3
ENSG00000163286	ALPPL2	-2.51772	7.39025e-06	0.000389995	L-TB vs. Ctrl	Module 3
ENSG00000163508	EOMES	1.89563	9.06421e-05	0.00258518	L-TB vs. Ctrl	Module 1
ENSG00000163518	FCRL4	6.28586	3.55518e-08	5.03845e-06	L-TB vs. Ctrl	Module 1
ENSG00000163519	TRAT1	2.23676	0.000100615	0.00359058	AL-TB vs. Ctrl	Module 1
ENSG00000163519	TRAT1	2.61272	7.23039e-06	0.000383769	L-TB vs. Ctrl	Module 1
ENSG00000163534	FCRL1	1.69133	0.0015499	0.0213612	L-TB vs. Ctrl	Module 1
ENSG00000163564	PYHIN1	1.83646	2.55133e-06	0.00016819	L-TB vs. Ctrl	Module 1
ENSG00000163564	PYHIN1	1.54823	8.54493e-06	0.000614655	AL-TB vs. Ctrl	Module 1
ENSG00000163568	AIM2	1.60002	0.00020666	0.0149858	L-TB vs. AL-TB	Module 1
ENSG00000163568	AIM2	2.89993	3.01119e-11	1.2175e-08	L-TB vs. Ctrl	Module 1
ENSG00000163599	CTLA4	2.11712	4.55571e-07	6.64073e-05	AL-TB vs. Ctrl	Module 1
ENSG00000163599	CTLA4	2.69792	2.01185e-10	5.88446e-08	L-TB vs. Ctrl	Module 1
ENSG00000163600	ICOS	2.17077	2.2822e-06	0.000153791	L-TB vs. Ctrl	Module 1
ENSG00000163600	ICOS	1.91427	3.05418e-05	0.00151498	AL-TB vs. Ctrl	Module 1
ENSG00000163632	C3orf49	1.89991	0.0046242	0.047062	AL-TB vs. Ctrl	Module 2
ENSG00000163659	TIPARP	1.79424	1.21616e-07	2.29488e-05	AL-TB vs. Ctrl	Module 2
ENSG00000163736	PPBP	-1.87873	0.000812397	0.013407	L-TB vs. Ctrl	Module 3
ENSG00000163794	UCN	-1.57381	0.00278713	0.0348076	AL-TB vs. Ctrl	Module 4
ENSG00000163810	TGM4	2.00532	0.00111855	0.0191361	AL-TB vs. Ctrl	Module 2
ENSG00000163884	KLF15	-1.94273	2.41356e-06	0.000161064	L-TB vs. Ctrl	Module 3
ENSG00000163898	LIPH	-1.56995	0.000607083	0.0107338	L-TB vs. Ctrl	Module 3
ENSG00000164023	SGMS2	1.76205	1.82328e-05	0.00106422	AL-TB vs. Ctrl	Module 2
ENSG00000164078	MST1R	-1.67119	0.000218563	0.00506249	L-TB vs. Ctrl	Module 3
ENSG00000164440	TXLNB	1.79651	1.94175e-05	0.000816309	L-TB vs. Ctrl	Module 1
ENSG00000164485	IL22RA2	6.94244	5.92652e-10	1.55185e-07	L-TB vs. Ctrl	Module 1
ENSG00000164619	BMPER	-1.64209	2.7747e-06	0.0001797	L-TB vs. Ctrl	Module 3
ENSG00000164691	TAGAP	1.98614	7.97509e-07	6.60443e-05	L-TB vs. Ctrl	Module 1
ENSG00000164692	COL1A2	1.58087	6.71233e-06	0.000363285	L-TB vs. Ctrl	Module 1
ENSG00000164694	FNDC1	2.23903	2.57256e-06	0.00078877	L-TB vs. AL-TB	Module 1
ENSG00000164694	FNDC1	2.74272	3.68079e-07	3.47765e-05	L-TB vs. Ctrl	Module 1
ENSG00000164746	C7orf57	-1.81668	0.00405918	0.0408056	L-TB vs. Ctrl	Module 3
ENSG00000164749	HNF4G	-2.60807	0.00125373	0.0498103	L-TB vs. AL-TB	Module 2
ENSG00000164932	CTHRC1	2.71591	5.38123e-10	6.32474e-07	L-TB vs. AL-TB	Module 4
ENSG00000164932	CTHRC1	2.34896	6.76372e-07	5.77521e-05	L-TB vs. Ctrl	Module 4
ENSG00000164949	GEM	1.70311	4.51758e-06	0.000264045	L-TB vs. Ctrl	Module 1
ENSG00000165030	NFIL3	1.7438	2.02659e-06	0.000206787	AL-TB vs. Ctrl	Module 2
ENSG00000165030	NFIL3	1.5984	2.90041e-05	0.00109991	L-TB vs. Ctrl	Module 2
ENSG00000165046	LETM2	1.65028	3.25081e-10	1.44451e-07	AL-TB vs. Ctrl	Module 2
ENSG00000165066	NKX6-3	3.9745	0.000293567	0.0193029	L-TB vs. AL-TB	Module 4
ENSG00000165164	CXorf22	-3.48599	0.000752196	0.0357807	L-TB vs. AL-TB	Module 2
ENSG00000165192	ASB11	1.86311	0.00412781	0.043655	AL-TB vs. Ctrl	Module 2
ENSG00000165194	PCDH19	1.50427	0.00338864	0.036057	L-TB vs. Ctrl	Module 1
ENSG00000165195	PIGA	1.5607	2.14446e-08	4.9647e-06	AL-TB vs. Ctrl	Module 2
ENSG00000165409	TSHR	2.67988	1.43132e-05	0.000647163	L-TB vs. Ctrl	Module 1
ENSG00000165474	GJB2	2.57686	1.18974e-05	0.00220779	L-TB vs. AL-TB	Module 1
ENSG00000165474	GJB2	2.79929	1.58683e-05	0.000703471	L-TB vs. Ctrl	Module 1
ENSG00000165509	MAGEC3	2.61791	0.00226228	0.0278047	L-TB vs. Ctrl	Module 1
ENSG00000165702	GFI1B	-1.80563	0.000365158	0.00892721	AL-TB vs. Ctrl	Module 3
ENSG00000165702	GFI1B	-1.82685	0.000263343	0.00582958	L-TB vs. Ctrl	Module 3
ENSG00000165887	ANKRD2	-1.68263	0.00263171	0.0335658	AL-TB vs. Ctrl	Module 3
ENSG00000165887	ANKRD2	-2.16494	0.00020755	0.0048856	L-TB vs. Ctrl	Module 3
ENSG00000166035	LIPC	1.6343	0.00021076	0.00493161	L-TB vs. Ctrl	Module 1
ENSG00000166046	TCP11L2	1.56173	4.38815e-05	0.00196895	AL-TB vs. Ctrl	Module 2
ENSG00000166105	GLB1L3	2.32617	0.000154672	0.0126098	L-TB vs. AL-TB	Module 4
ENSG00000166126	AMN	-2.21905	1.63574e-05	0.000719569	L-TB vs. Ctrl	Module 3
ENSG00000166126	AMN	-2.09581	9.29053e-06	0.000647985	AL-TB vs. Ctrl	Module 3
ENSG00000166148	AVPR1A	2.72942	0.00135012	0.0218285	AL-TB vs. Ctrl	Module 1
ENSG00000166148	AVPR1A	4.09747	2.27385e-06	0.000153791	L-TB vs. Ctrl	Module 1
ENSG00000166246	C16orf71	-1.87687	0.000756565	0.0127068	L-TB vs. Ctrl	Module 3
ENSG00000166292	TMEM100	-2.03194	0.00042345	0.00825698	L-TB vs. Ctrl	Module 3
ENSG00000166323	C11orf65	1.67749	0.000774277	0.0129235	L-TB vs. Ctrl	Module 1
ENSG00000166333	ILK	2.29595	2.28908e-08	5.16918e-06	AL-TB vs. Ctrl	Module 2
ENSG00000166333	ILK	1.98688	0.000120358	0.00318185	L-TB vs. Ctrl	Module 2
ENSG00000166340	TPP1	1.51572	1.6238e-06	0.00011596	L-TB vs. Ctrl	Module 1
ENSG00000166342	NETO1	3.15154	0.000795083	0.0131925	L-TB vs. Ctrl	Module 1
ENSG00000166342	NETO1	2.72422	0.000830296	0.0379595	L-TB vs. AL-TB	Module 1
ENSG00000166391	MOGAT2	4.93322	8.80789e-06	0.000442713	L-TB vs. Ctrl	Module 1
ENSG00000166401	SERPINB8	1.96271	4.63199e-06	0.000387877	AL-TB vs. Ctrl	Module 2
ENSG00000166455	C16orf46	1.53473	5.81923e-05	0.00187347	L-TB vs. Ctrl	Module 2
ENSG00000166455	C16orf46	1.9949	1.11283e-05	0.000747768	AL-TB vs. Ctrl	Module 2
ENSG00000166483	WEE1	1.71928	1.41746e-09	5.13829e-07	AL-TB vs. Ctrl	Module 2
ENSG00000166546	BEAN1	1.57763	0.000152768	0.0038358	L-TB vs. Ctrl	Module 1
ENSG00000166603	MC4R	3.7111	0.00133073	0.0191355	L-TB vs. Ctrl	Module 1
ENSG00000166603	MC4R	3.32018	0.000834815	0.0380428	L-TB vs. AL-TB	Module 1
ENSG00000166664	CHRFAM7A	1.6818	0.00165859	0.0249397	AL-TB vs. Ctrl	Module 2
ENSG00000166670	MMP10	2.26351	0.000829537	0.0136163	L-TB vs. Ctrl	Module 1
ENSG00000166670	MMP10	3.08352	1.27907e-05	0.000827192	AL-TB vs. Ctrl	Module 1
ENSG00000166922	SCG5	2.17672	1.11786e-05	0.00210218	L-TB vs. AL-TB	Module 4
ENSG00000166923	GREM1	3.06344	1.14799e-06	0.000399783	L-TB vs. AL-TB	Module 1
ENSG00000166923	GREM1	2.87083	0.000399483	0.00793024	L-TB vs. Ctrl	Module 1
ENSG00000166924	NYAP1	-1.55649	2.35642e-05	0.00127794	AL-TB vs. Ctrl	Module 4
ENSG00000166926	MS4A6E	-3.95942	0.000379638	0.00763553	L-TB vs. Ctrl	Module 4
ENSG00000166926	MS4A6E	-3.84692	0.000303605	0.00778076	AL-TB vs. Ctrl	Module 4
ENSG00000166961	MS4A15	-2.18712	0.000386211	0.00771133	L-TB vs. Ctrl	Module 3
ENSG00000167077	MEI1	1.68219	6.07607e-06	0.000336847	L-TB vs. Ctrl	Module 1
ENSG00000167136	ENDOG	-1.60849	0.0036548	0.0406684	AL-TB vs. Ctrl	Module 4
ENSG00000167178	ISLR2	2.24704	6.08908e-06	0.000336847	L-TB vs. Ctrl	Module 1
ENSG00000167178	ISLR2	1.74316	9.38647e-05	0.00894398	L-TB vs. AL-TB	Module 1
ENSG00000167183	PRR15L	-1.81109	2.6725e-06	0.000259252	AL-TB vs. Ctrl	Module 3
ENSG00000167183	PRR15L	-2.35482	8.7697e-07	7.05788e-05	L-TB vs. Ctrl	Module 3
ENSG00000167244	IGF2	2.32397	1.40588e-05	0.000876292	AL-TB vs. Ctrl	Module 1
ENSG00000167244	IGF2	2.81473	1.91822e-07	2.04417e-05	L-TB vs. Ctrl	Module 1
ENSG00000167332	OR51E2	3.46079	0.000468933	0.0263381	L-TB vs. AL-TB	Module 2
ENSG00000167476	JSRP1	2.83521	0.000215686	0.0155206	L-TB vs. AL-TB	Module 1
ENSG00000167476	JSRP1	3.82091	8.49805e-08	1.04774e-05	L-TB vs. Ctrl	Module 1
ENSG00000167483	FAM129C	3.23269	8.83106e-12	4.58116e-09	L-TB vs. Ctrl	Module 1
ENSG00000167483	FAM129C	2.09705	6.98408e-07	0.000277475	L-TB vs. AL-TB	Module 1
ENSG00000167524	SGK494	2.46239	8.08938e-05	0.0031126	AL-TB vs. Ctrl	Module 1
ENSG00000167524	SGK494	2.69913	8.29381e-06	0.000427022	L-TB vs. Ctrl	Module 1
ENSG00000167549	CORO6	-1.55803	8.172e-05	0.00313563	AL-TB vs. Ctrl	Module 3
ENSG00000167549	CORO6	-1.82199	2.9376e-06	0.000187829	L-TB vs. Ctrl	Module 3
ENSG00000167644	C19orf33	-1.71363	0.00386764	0.0418889	AL-TB vs. Ctrl	Module 3
ENSG00000167644	C19orf33	-2.21856	0.000955902	0.0151304	L-TB vs. Ctrl	Module 3
ENSG00000167653	PSCA	-2.36493	0.00223248	0.0302533	AL-TB vs. Ctrl	Module 3
ENSG00000167653	PSCA	-2.52938	0.00220416	0.0273471	L-TB vs. Ctrl	Module 3
ENSG00000167711	SERPINF2	-1.65422	0.00214828	0.0294031	AL-TB vs. Ctrl	Module 4
ENSG00000167723	TRPV3	1.83744	2.71413e-05	0.00105959	L-TB vs. Ctrl	Module 1
ENSG00000167757	KLK11	-1.57678	0.00283971	0.0322224	L-TB vs. Ctrl	Module 3
ENSG00000167767	KRT80	-1.7896	0.00200892	0.0256549	L-TB vs. Ctrl	Module 3
ENSG00000167799	NUDT8	-1.59146	0.00403062	0.0429994	AL-TB vs. Ctrl	Module 4
ENSG00000167880	EVPL	-1.85552	4.29167e-06	0.000252666	L-TB vs. Ctrl	Module 3
ENSG00000167941	SOST	4.29039	0.000102232	0.00280515	L-TB vs. Ctrl	Module 1
ENSG00000168081	PNOC	3.29627	3.06791e-09	6.34203e-07	L-TB vs. Ctrl	Module 1
ENSG00000168081	PNOC	2.3892	5.57438e-07	0.000227887	L-TB vs. AL-TB	Module 1
ENSG00000168243	GNG4	3.38279	1.88461e-07	2.01617e-05	L-TB vs. Ctrl	Module 1
ENSG00000168274	HIST1H2AE	2.03358	0.000411989	0.00813738	L-TB vs. Ctrl	Module 1
ENSG00000168298	HIST1H1E	3.98776	6.01394e-07	5.1996e-05	L-TB vs. Ctrl	Module 1
ENSG00000168334	XIRP1	3.62017	0.000255287	0.00569891	L-TB vs. Ctrl	Module 1
ENSG00000168386	FILIP1L	2.03596	6.09903e-07	8.44363e-05	AL-TB vs. Ctrl	Module 2
ENSG00000168386	FILIP1L	1.64262	0.000100116	0.00277678	L-TB vs. Ctrl	Module 2
ENSG00000168398	BDKRB2	1.62406	0.000329741	0.00825851	AL-TB vs. Ctrl	Module 1
ENSG00000168398	BDKRB2	2.20566	2.90383e-06	0.000186537	L-TB vs. Ctrl	Module 1
ENSG00000168421	RHOH	2.01961	1.17675e-08	1.97279e-06	L-TB vs. Ctrl	Module 1
ENSG00000168542	COL3A1	2.17181	1.59574e-05	0.000704467	L-TB vs. Ctrl	Module 4
ENSG00000168542	COL3A1	2.51858	5.42369e-09	5.09972e-06	L-TB vs. AL-TB	Module 4
ENSG00000168621	GDNF	1.91825	0.000644093	0.0323559	L-TB vs. AL-TB	Module 4
ENSG00000168658	VWA3B	-2.13163	0.00352028	0.036857	L-TB vs. Ctrl	Module 3
ENSG00000168779	SHOX2	3.37905	7.45835e-07	0.000288199	L-TB vs. AL-TB	Module 4
ENSG00000168779	SHOX2	3.34057	1.76892e-05	0.000764698	L-TB vs. Ctrl	Module 4
ENSG00000168874	ATOH8	-1.63688	0.00294363	0.0329663	L-TB vs. Ctrl	Module 3
ENSG00000168907	PLA2G4F	-1.77224	0.0014652	0.0206192	L-TB vs. Ctrl	Module 3
ENSG00000169174	PCSK9	-1.64555	0.00041195	0.00970848	AL-TB vs. Ctrl	Module 3
ENSG00000169174	PCSK9	-2.72764	1.25273e-06	9.3346e-05	L-TB vs. Ctrl	Module 3
ENSG00000169194	IL13	3.05348	0.00084661	0.0138059	L-TB vs. Ctrl	Module 1
ENSG00000169213	RAB3B	1.98808	0.00187014	0.0244033	L-TB vs. Ctrl	Module 1
ENSG00000169242	EFNA1	-1.65072	1.44736e-06	0.000105554	L-TB vs. Ctrl	Module 3
ENSG00000169245	CXCL10	1.66083	0.00206574	0.0286561	AL-TB vs. Ctrl	Module 1
ENSG00000169245	CXCL10	1.96836	0.000593534	0.0105606	L-TB vs. Ctrl	Module 1
ENSG00000169246	NPIPB3	1.56732	2.72689e-06	0.000178083	L-TB vs. Ctrl	Module 1
ENSG00000169246	NPIPB3	1.6363	1.96498e-05	0.00113043	AL-TB vs. Ctrl	Module 1
ENSG00000169397	RNASE3	-3.88515	0.000545253	0.00992137	L-TB vs. Ctrl	Module 3
ENSG00000169402	RSPH10B2	-3.7677	0.000156083	0.0126451	L-TB vs. AL-TB	Module 2
ENSG00000169402	RSPH10B2	-2.11937	0.00463432	0.044604	L-TB vs. Ctrl	Module 2
ENSG00000169436	COL22A1	1.51849	0.000294261	0.00632751	L-TB vs. Ctrl	Module 1
ENSG00000169495	HTRA4	1.72921	0.000144914	0.0036823	L-TB vs. Ctrl	Module 1
ENSG00000169507	SLC38A11	2.23114	0.000248038	0.017065	L-TB vs. AL-TB	Module 4
ENSG00000169508	GPR183	2.19711	4.4942e-11	4.9526e-08	AL-TB vs. Ctrl	Module 1
ENSG00000169508	GPR183	2.88668	2.21582e-13	2.17578e-10	L-TB vs. Ctrl	Module 1
ENSG00000169583	CLIC3	-1.7045	0.00471848	0.0451391	L-TB vs. Ctrl	Module 3
ENSG00000169594	BNC1	-2.63103	0.000813412	0.0155406	AL-TB vs. Ctrl	Module 4
ENSG00000169704	GP9	-2.21886	0.00172358	0.0230741	L-TB vs. Ctrl	Module 3
ENSG00000169710	FASN	-1.79075	7.2876e-06	0.000385318	L-TB vs. Ctrl	Module 3
ENSG00000169908	TM4SF1	1.50036	7.69281e-07	9.99703e-05	AL-TB vs. Ctrl	Module 2
ENSG00000169962	TAS1R3	1.75507	0.00401245	0.0405159	L-TB vs. Ctrl	Module 4
ENSG00000170324	FRMPD2	-2.7911	0.000199518	0.0148106	L-TB vs. AL-TB	Module 3
ENSG00000170324	FRMPD2	-2.49016	0.00032257	0.00675456	L-TB vs. Ctrl	Module 3
ENSG00000170345	FOS	1.88879	2.45658e-05	0.000977441	L-TB vs. Ctrl	Module 1
ENSG00000170345	FOS	1.75559	0.000114147	0.00397567	AL-TB vs. Ctrl	Module 1
ENSG00000170396	ZNF804A	1.57817	0.00472594	0.047605	AL-TB vs. Ctrl	Module 2
ENSG00000170476	MZB1	3.62257	1.39838e-11	6.32132e-09	L-TB vs. Ctrl	Module 1
ENSG00000170476	MZB1	2.42615	6.56303e-06	0.00154275	L-TB vs. AL-TB	Module 1
ENSG00000170477	KRT4	-2.10068	0.000681351	0.0117228	L-TB vs. Ctrl	Module 3
ENSG00000170542	SERPINB9	1.61928	6.46293e-10	2.61844e-07	AL-TB vs. Ctrl	Module 2
ENSG00000170549	IRX1	-1.5668	0.00129876	0.0188732	L-TB vs. Ctrl	Module 3
ENSG00000170819	BFSP2	2.68954	0.000483773	0.00910395	L-TB vs. Ctrl	Module 1
ENSG00000170819	BFSP2	2.346	0.000563096	0.029982	L-TB vs. AL-TB	Module 1
ENSG00000170961	HAS2	2.90806	4.33257e-09	8.56976e-07	L-TB vs. Ctrl	Module 2
ENSG00000170961	HAS2	3.21806	4.8195e-10	2.04273e-07	AL-TB vs. Ctrl	Module 2
ENSG00000171056	SOX7	2.07055	4.69538e-13	1.07798e-09	AL-TB vs. Ctrl	Module 2
ENSG00000171056	SOX7	1.75713	2.36029e-06	0.000157964	L-TB vs. Ctrl	Module 2
ENSG00000171119	NRTN	-2.02672	0.000362068	0.00739576	L-TB vs. Ctrl	Module 3
ENSG00000171119	NRTN	-1.83419	0.000440283	0.0100838	AL-TB vs. Ctrl	Module 3
ENSG00000171124	FUT3	-2.08526	0.00175721	0.0234015	L-TB vs. Ctrl	Module 3
ENSG00000171124	FUT3	-2.52974	4.4145e-08	9.21359e-06	AL-TB vs. Ctrl	Module 3
ENSG00000171345	KRT19	-1.61488	0.00341252	0.0361431	L-TB vs. Ctrl	Module 3
ENSG00000171401	KRT13	-2.21246	0.000596272	0.0105948	L-TB vs. Ctrl	Module 3
ENSG00000171401	KRT13	-1.78285	0.000318777	0.00803505	AL-TB vs. Ctrl	Module 3
ENSG00000171476	HOPX	-1.84325	1.82942e-06	0.000128969	L-TB vs. Ctrl	Module 3
ENSG00000171496	OR1L8	2.76407	0.00256565	0.0299685	L-TB vs. Ctrl	Module 1
ENSG00000171812	COL8A2	1.61756	0.000169713	0.013439	L-TB vs. AL-TB	Module 4
ENSG00000171872	KLF17	-1.87276	2.94062e-05	0.00111057	L-TB vs. Ctrl	Module 3
ENSG00000171931	FBXW10	-2.16699	0.00215876	0.0269909	L-TB vs. Ctrl	Module 3
ENSG00000171951	SCG2	1.63542	0.000127647	0.0108782	L-TB vs. AL-TB	Module 1
ENSG00000171951	SCG2	1.8845	0.000455707	0.00871661	L-TB vs. Ctrl	Module 1
ENSG00000172020	GAP43	2.38734	0.000907737	0.0145439	L-TB vs. Ctrl	Module 1
ENSG00000172061	LRRC15	4.37938	1.03844e-08	1.77335e-06	L-TB vs. Ctrl	Module 1
ENSG00000172061	LRRC15	2.94912	8.90611e-07	0.000319352	L-TB vs. AL-TB	Module 1
ENSG00000172139	SLC9C1	-1.58076	0.001718	0.0230223	L-TB vs. Ctrl	Module 3
ENSG00000172156	CCL11	2.30917	2.4255e-05	0.000970694	L-TB vs. Ctrl	Module 1
ENSG00000172156	CCL11	1.99864	9.95965e-05	0.00358678	AL-TB vs. Ctrl	Module 1
ENSG00000172367	PDZD3	-1.52079	0.000953255	0.0173624	AL-TB vs. Ctrl	Module 3
ENSG00000172482	AGXT	2.57121	0.000237157	0.00659301	AL-TB vs. Ctrl	Module 2
ENSG00000172724	CCL19	1.58025	0.000271737	0.0181639	L-TB vs. AL-TB	Module 1
ENSG00000172724	CCL19	2.64208	2.37774e-07	2.43024e-05	L-TB vs. Ctrl	Module 1
ENSG00000173124	C10orf129	3.3804	0.000159352	0.00493753	AL-TB vs. Ctrl	Module 2
ENSG00000173153	ESRRA	-1.62971	9.02849e-05	0.00335472	AL-TB vs. Ctrl	Module 4
ENSG00000173200	PARP15	1.97279	1.26382e-10	4.04039e-08	L-TB vs. Ctrl	Module 1
ENSG00000173227	SYT12	2.4206	3.70013e-05	0.00497016	L-TB vs. AL-TB	Module 1
ENSG00000173227	SYT12	2.90816	2.0093e-06	0.000139858	L-TB vs. Ctrl	Module 1
ENSG00000173262	SLC2A14	2.04445	0.000497075	0.0109708	AL-TB vs. Ctrl	Module 2
ENSG00000173262	SLC2A14	2.39808	0.000722185	0.0122718	L-TB vs. Ctrl	Module 2
ENSG00000173334	TRIB1	2.04281	1.02225e-09	2.50943e-07	L-TB vs. Ctrl	Module 2
ENSG00000173334	TRIB1	2.60192	2.40502e-18	2.20861e-14	AL-TB vs. Ctrl	Module 2
ENSG00000173432	SAA1	-4.3271	3.76136e-09	1.21912e-06	AL-TB vs. Ctrl	Module 4
ENSG00000173530	TNFRSF10D	1.7051	2.31709e-08	5.1899e-06	AL-TB vs. Ctrl	Module 2
ENSG00000173621	LRFN4	-1.51143	0.000862432	0.0162517	AL-TB vs. Ctrl	Module 4
ENSG00000173727	AP000769.1	2.39376	4.92378e-06	0.00028321	L-TB vs. Ctrl	Module 2
ENSG00000173727	AP000769.1	2.73183	8.33252e-07	0.000105303	AL-TB vs. Ctrl	Module 2
ENSG00000174038	C9orf131	2.25964	1.32709e-05	0.000840491	AL-TB vs. Ctrl	Module 2
ENSG00000174123	TLR10	1.69858	3.36933e-05	0.00463619	L-TB vs. AL-TB	Module 1
ENSG00000174123	TLR10	2.9326	6.86464e-09	1.25824e-06	L-TB vs. Ctrl	Module 1
ENSG00000174137	FAM53A	-1.57836	6.43138e-05	0.00262885	AL-TB vs. Ctrl	Module 4
ENSG00000174255	ZNF80	2.7148	0.0025311	0.0327841	AL-TB vs. Ctrl	Module 1
ENSG00000174255	ZNF80	3.34513	1.7428e-05	0.000756975	L-TB vs. Ctrl	Module 1
ENSG00000174348	PODN	1.59934	0.000317102	0.00667491	L-TB vs. Ctrl	Module 1
ENSG00000174368	PMS2P2	-1.79884	0.00332806	0.0356176	L-TB vs. Ctrl	Module 3
ENSG00000174368	PMS2P2	-1.85864	0.000528943	0.0114204	AL-TB vs. Ctrl	Module 3
ENSG00000174669	SLC29A2	-1.55078	0.000344736	0.00711575	L-TB vs. Ctrl	Module 3
ENSG00000174697	LEP	6.54291	9.94444e-11	3.3343e-08	L-TB vs. Ctrl	Module 1
ENSG00000174844	DNAH12	-2.02807	0.00114098	0.0172049	L-TB vs. Ctrl	Module 3
ENSG00000174946	GPR171	1.94148	0.000284025	0.00745096	AL-TB vs. Ctrl	Module 1
ENSG00000174946	GPR171	1.94324	7.66812e-05	0.00228761	L-TB vs. Ctrl	Module 1
ENSG00000175318	GRAMD2	-1.94842	0.000114412	0.00305401	L-TB vs. Ctrl	Module 3
ENSG00000175352	NRIP3	1.82855	7.34094e-07	6.15341e-05	L-TB vs. Ctrl	Module 1
ENSG00000175592	FOSL1	2.25952	0.000302591	0.00644417	L-TB vs. Ctrl	Module 2
ENSG00000175592	FOSL1	3.21626	2.72302e-06	0.000260483	AL-TB vs. Ctrl	Module 2
ENSG00000175600	SUGCT	1.75046	4.44866e-05	0.00153272	L-TB vs. Ctrl	Module 4
ENSG00000175600	SUGCT	2.17864	2.95985e-08	2.25652e-05	L-TB vs. AL-TB	Module 4
ENSG00000175707	C1orf172	-1.54852	0.000148217	0.00374548	L-TB vs. Ctrl	Module 3
ENSG00000175920	DOK7	-1.90011	0.00198643	0.0254377	L-TB vs. Ctrl	Module 3
ENSG00000176125	UFSP1	-2.16945	2.78253e-05	0.00143287	AL-TB vs. Ctrl	Module 4
ENSG00000176125	UFSP1	-1.55782	0.00300157	0.0334045	L-TB vs. Ctrl	Module 4
ENSG00000176177	ENTHD1	2.49511	0.000734359	0.0144511	AL-TB vs. Ctrl	Module 1
ENSG00000176177	ENTHD1	4.88172	1.96831e-08	3.02327e-06	L-TB vs. Ctrl	Module 1
ENSG00000176177	ENTHD1	2.3459	0.000104412	0.00953159	L-TB vs. AL-TB	Module 1
ENSG00000176532	PRR15	-1.53267	0.00427542	0.042314	L-TB vs. Ctrl	Module 3
ENSG00000176597	B3GNT5	1.70873	6.78714e-06	0.000519405	AL-TB vs. Ctrl	Module 2
ENSG00000176753	C15orf56	-1.66074	0.00413189	0.0436813	AL-TB vs. Ctrl	Module 3
ENSG00000176771	NCKAP5	-1.59656	7.17706e-06	0.00164594	L-TB vs. AL-TB	Module 2
ENSG00000176788	BASP1	1.55215	2.81758e-13	2.67126e-10	L-TB vs. Ctrl	Module 1
ENSG00000176842	IRX5	-1.88357	4.66154e-05	0.00158816	L-TB vs. Ctrl	Module 3
ENSG00000177106	EPS8L2	-1.931	2.14943e-06	0.000147741	L-TB vs. Ctrl	Module 3
ENSG00000177133	LINC00982	-1.54354	0.000970146	0.015282	L-TB vs. Ctrl	Module 3
ENSG00000177181	RIMKLA	-1.94308	7.54715e-07	6.30703e-05	L-TB vs. Ctrl	Module 3
ENSG00000177191	B3GNT8	-1.55196	0.000923661	0.0147389	L-TB vs. Ctrl	Module 3
ENSG00000177359	RP11-551L14.1	2.79704	1.02883e-05	0.000498545	L-TB vs. Ctrl	Module 1
ENSG00000177455	CD19	4.21753	6.87076e-13	5.39728e-10	L-TB vs. Ctrl	Module 1
ENSG00000177455	CD19	3.07475	2.06232e-07	0.00010206	L-TB vs. AL-TB	Module 1
ENSG00000177494	ZBED2	-2.01308	0.00021755	0.00504328	L-TB vs. Ctrl	Module 3
ENSG00000177519	RPRM	-2.14869	0.00317279	0.0345203	L-TB vs. Ctrl	Module 4
ENSG00000177519	RPRM	-2.61703	0.000213761	0.00610903	AL-TB vs. Ctrl	Module 4
ENSG00000177606	JUN	1.59315	4.41404e-06	0.000375329	AL-TB vs. Ctrl	Module 2
ENSG00000177764	ZCCHC3	-1.88774	9.22313e-06	0.000645761	AL-TB vs. Ctrl	Module 4
ENSG00000177764	ZCCHC3	-1.61323	0.000110442	0.00297736	L-TB vs. Ctrl	Module 4
ENSG00000177807	KCNJ10	2.54242	3.12882e-05	0.0011688	L-TB vs. Ctrl	Module 1
ENSG00000177807	KCNJ10	2.10036	0.000702218	0.0139582	AL-TB vs. Ctrl	Module 1
ENSG00000178031	ADAMTSL1	1.5806	0.000518429	0.00957909	L-TB vs. Ctrl	Module 1
ENSG00000178199	ZC3H12D	2.07143	3.19164e-08	4.64813e-06	L-TB vs. Ctrl	Module 1
ENSG00000178531	CTXN1	-1.95774	0.00175812	0.0258465	AL-TB vs. Ctrl	Module 4
ENSG00000178562	CD28	2.02307	2.88682e-06	0.000185879	L-TB vs. Ctrl	Module 1
ENSG00000178726	THBD	1.5267	3.96581e-07	5.97039e-05	AL-TB vs. Ctrl	Module 2
ENSG00000178772	CPN2	3.63776	0.00129249	0.018802	L-TB vs. Ctrl	Module 1
ENSG00000178789	CD300LB	1.50034	2.80167e-05	0.0010766	L-TB vs. Ctrl	Module 1
ENSG00000178795	GDPD4	2.68126	0.00247202	0.0322949	AL-TB vs. Ctrl	Module 2
ENSG00000178814	OPLAH	-1.53613	0.000390866	0.00930714	AL-TB vs. Ctrl	Module 3
ENSG00000178814	OPLAH	-1.56426	0.00151545	0.0211397	L-TB vs. Ctrl	Module 3
ENSG00000178826	TMEM139	-1.89864	0.000542071	0.00988774	L-TB vs. Ctrl	Module 3
ENSG00000178878	APOLD1	1.89706	1.03439e-05	0.000499815	L-TB vs. Ctrl	Module 2
ENSG00000178878	APOLD1	2.01333	8.86873e-06	0.000624894	AL-TB vs. Ctrl	Module 2
ENSG00000178882	FAM101A	2.59561	7.78165e-06	0.0017421	L-TB vs. AL-TB	Module 4
ENSG00000178965	C1orf173	-2.57009	5.1231e-05	0.00628315	L-TB vs. AL-TB	Module 3
ENSG00000179023	KLHDC7A	-1.91383	3.61603e-05	0.0013013	L-TB vs. Ctrl	Module 3
ENSG00000179088	C12orf42	2.81342	0.000233184	0.00532778	L-TB vs. Ctrl	Module 1
ENSG00000179178	TMEM125	-1.61896	0.0029727	0.0331702	L-TB vs. Ctrl	Module 3
ENSG00000179292	TMEM151A	-2.63287	0.002419	0.031886	AL-TB vs. Ctrl	Module 3
ENSG00000179292	TMEM151A	-3.12865	0.000136693	0.00351663	L-TB vs. Ctrl	Module 3
ENSG00000179388	EGR3	3.16233	1.66676e-11	2.08724e-08	AL-TB vs. Ctrl	Module 1
ENSG00000179388	EGR3	3.5847	9.90498e-12	4.82531e-09	L-TB vs. Ctrl	Module 1
ENSG00000179399	GPC5	-1.66979	0.000741188	0.0355569	L-TB vs. AL-TB	Module 3
ENSG00000179542	SLITRK4	1.61545	0.000454286	0.0258357	L-TB vs. AL-TB	Module 4
ENSG00000179766	ATP8B5P	1.75305	2.03315e-07	3.52285e-05	AL-TB vs. Ctrl	Module 2
ENSG00000179772	FOXS1	-1.58729	0.00246274	0.0322474	AL-TB vs. Ctrl	Module 4
ENSG00000179813	FAM216B	-2.28764	0.00062278	0.0319973	L-TB vs. AL-TB	Module 3
ENSG00000179813	FAM216B	-1.87511	0.00169849	0.0228131	L-TB vs. Ctrl	Module 3
ENSG00000179820	MYADM	2.33303	6.54837e-20	9.02039e-16	AL-TB vs. Ctrl	Module 2
ENSG00000179820	MYADM	1.55583	1.86521e-08	2.9304e-06	L-TB vs. Ctrl	Module 2
ENSG00000179846	NKPD1	-2.23414	0.00171846	0.0254536	AL-TB vs. Ctrl	Module 4
ENSG00000179869	ABCA13	-1.62626	0.0027159	0.0312273	L-TB vs. Ctrl	Module 3
ENSG00000179873	NLRP11	4.01586	8.74702e-05	0.00851633	L-TB vs. AL-TB	Module 4
ENSG00000179914	ITLN1	-3.10565	0.000409924	0.0096856	AL-TB vs. Ctrl	Module 3
ENSG00000179935	LINC00652	-1.99898	0.00232731	0.03114	AL-TB vs. Ctrl	Module 4
ENSG00000179954	SSC5D	1.92143	2.28023e-06	0.000153791	L-TB vs. Ctrl	Module 1
ENSG00000180066	C10orf91	1.94698	0.00146634	0.0231771	AL-TB vs. Ctrl	Module 1
ENSG00000180066	C10orf91	2.12725	1.13245e-05	0.000533694	L-TB vs. Ctrl	Module 1
ENSG00000180096	SEPTIN1	2.00361	7.2227e-12	3.84276e-09	L-TB vs. Ctrl	Module 1
ENSG00000180610	ZBTB12P1	3.07113	0.00263128	0.0335658	AL-TB vs. Ctrl	Module 1
ENSG00000180610	ZBTB12P1	4.11843	8.89747e-05	0.00254522	L-TB vs. Ctrl	Module 1
ENSG00000180616	SSTR2	2.04968	2.90473e-05	0.00110004	L-TB vs. Ctrl	Module 1
ENSG00000180712	RP11-290F5.2	1.96109	0.000100601	0.00277678	L-TB vs. Ctrl	Module 1
ENSG00000180785	OR51E1	3.39975	0.000416284	0.0243914	L-TB vs. AL-TB	Module 4
ENSG00000180785	OR51E1	3.10193	0.00327362	0.0352822	L-TB vs. Ctrl	Module 4
ENSG00000180818	HOXC10	4.81244	2.42528e-05	0.00367037	L-TB vs. AL-TB	Module 4
ENSG00000180818	HOXC10	3.90365	0.000492041	0.00921546	L-TB vs. Ctrl	Module 4
ENSG00000180871	CXCR2	2.30366	0.00073564	0.014466	AL-TB vs. Ctrl	Module 2
ENSG00000181143	MUC16	-1.92031	0.00382593	0.0417112	AL-TB vs. Ctrl	Module 4
ENSG00000181215	C4orf50	3.0002	0.00213107	0.0292968	AL-TB vs. Ctrl	Module 1
ENSG00000181215	C4orf50	3.27053	0.000361477	0.00739469	L-TB vs. Ctrl	Module 1
ENSG00000181222	POLR2A	1.79982	1.19975e-06	0.00014247	AL-TB vs. Ctrl	Module 2
ENSG00000181282	OR5AK3P	3.12365	0.00420237	0.0441049	AL-TB vs. Ctrl	Module 2
ENSG00000181291	TMEM132E	2.04129	0.000639899	0.0322388	L-TB vs. AL-TB	Module 4
ENSG00000181409	AATK	-2.28164	2.06759e-08	3.15813e-06	L-TB vs. Ctrl	Module 3
ENSG00000181577	C6orf223	-2.16142	0.000484959	0.00912001	L-TB vs. Ctrl	Module 3
ENSG00000181617	FDCSP	6.55795	1.99812e-09	6.79608e-07	AL-TB vs. Ctrl	Module 1
ENSG00000181617	FDCSP	7.61466	6.39328e-13	5.21003e-10	L-TB vs. Ctrl	Module 1
ENSG00000181656	GPR88	2.39767	9.34431e-05	0.00893506	L-TB vs. AL-TB	Module 4
ENSG00000181656	GPR88	-1.75614	0.00459762	0.0468741	AL-TB vs. Ctrl	Module 4
ENSG00000181826	RELL1	1.61997	0.000402215	0.00797872	L-TB vs. Ctrl	Module 2
ENSG00000181826	RELL1	1.86327	1.04943e-05	0.000715637	AL-TB vs. Ctrl	Module 2
ENSG00000181847	TIGIT	2.3736	2.12586e-14	2.92242e-11	L-TB vs. Ctrl	Module 1
ENSG00000181908	AP003774.4	-1.71944	0.000523949	0.0113649	AL-TB vs. Ctrl	Module 4
ENSG00000182224	CYB5D1	2.00066	5.37438e-12	7.79285e-09	AL-TB vs. Ctrl	Module 2
ENSG00000182368	FAM27A	-1.70562	0.00413945	0.0437109	AL-TB vs. Ctrl	Module 4
ENSG00000182487	NCF1B	1.52269	0.000691488	0.0118453	L-TB vs. Ctrl	Module 1
ENSG00000182795	C1orf116	-1.61267	0.00065948	0.0114317	L-TB vs. Ctrl	Module 3
ENSG00000182950	ODF3L1	1.91997	1.58837e-06	0.000173649	AL-TB vs. Ctrl	Module 2
ENSG00000182950	ODF3L1	1.67311	0.00121017	0.017898	L-TB vs. Ctrl	Module 2
ENSG00000183036	PCP4	2.35894	0.00193355	0.02497	L-TB vs. Ctrl	Module 4
ENSG00000183317	EPHA10	-1.57811	0.00392054	0.0398336	L-TB vs. Ctrl	Module 4
ENSG00000183317	EPHA10	-2.08041	0.00069889	0.013911	AL-TB vs. Ctrl	Module 4
ENSG00000183473	SSTR3	2.47763	0.00247295	0.0293572	L-TB vs. Ctrl	Module 1
ENSG00000183486	MX2	1.83894	5.43339e-07	7.67641e-05	AL-TB vs. Ctrl	Module 2
ENSG00000183508	FAM46C	1.95086	1.63378e-08	2.61158e-06	L-TB vs. Ctrl	Module 1
ENSG00000183560	FOLR4	3.27281	0.000623884	0.0319973	L-TB vs. AL-TB	Module 4
ENSG00000183607	GKN2	-1.68592	0.000604152	0.0106889	L-TB vs. Ctrl	Module 3
ENSG00000183671	GPR1	2.73902	0.000116639	0.0102106	L-TB vs. AL-TB	Module 4
ENSG00000183813	CCR4	2.31639	1.35342e-05	0.000617096	L-TB vs. Ctrl	Module 1
ENSG00000183840	GPR39	-1.71383	9.94353e-05	0.00276463	L-TB vs. Ctrl	Module 3
ENSG00000183918	SH2D1A	1.67064	3.66534e-05	0.0013156	L-TB vs. Ctrl	Module 1
ENSG00000183929	DUSP5P1	-2.19562	0.00427129	0.044658	AL-TB vs. Ctrl	Module 4
ENSG00000183960	KCNH8	2.16082	0.000543089	0.0098951	L-TB vs. Ctrl	Module 1
ENSG00000183977	PP2D1	1.5731	0.00119976	0.0201176	AL-TB vs. Ctrl	Module 2
ENSG00000184258	CDR1	2.82491	6.7943e-07	5.78336e-05	L-TB vs. Ctrl	Module 1
ENSG00000184293	CLECL1	1.83224	6.9671e-06	0.000373493	L-TB vs. Ctrl	Module 1
ENSG00000184345	IQCF2	19.2059	1.28478e-10	6.20976e-08	AL-TB vs. Ctrl	Module 2
ENSG00000184345	IQCF2	-20.2612	5.04964e-12	6.47455e-09	L-TB vs. AL-TB	Module 2
ENSG00000184363	PKP3	-1.86491	0.0010422	0.0160348	L-TB vs. Ctrl	Module 3
ENSG00000184557	SOCS3	1.98706	4.90077e-05	0.00165125	L-TB vs. Ctrl	Module 2
ENSG00000184557	SOCS3	2.00157	1.82035e-05	0.00106422	AL-TB vs. Ctrl	Module 2
ENSG00000184588	PDE4B	1.62159	2.16909e-05	0.000894105	L-TB vs. Ctrl	Module 1
ENSG00000184601	C14orf180	-2.0098	0.00360917	0.0404034	AL-TB vs. Ctrl	Module 4
ENSG00000184779	RPS17	-2.00736	1.1017e-05	0.000743918	AL-TB vs. Ctrl	Module 4
ENSG00000184937	WT1	2.92277	3.14288e-05	0.00448259	L-TB vs. AL-TB	Module 4
ENSG00000184956	MUC6	1.51057	0.00376998	0.0413632	AL-TB vs. Ctrl	Module 2
ENSG00000184956	MUC6	1.73972	0.00253511	0.0297357	L-TB vs. Ctrl	Module 2
ENSG00000184999	SLC22A10	1.7306	0.00477276	0.047884	AL-TB vs. Ctrl	Module 2
ENSG00000185022	MAFF	1.81929	1.3084e-05	0.000834406	AL-TB vs. Ctrl	Module 2
ENSG00000185040	AC004980.11	1.76356	0.000530817	0.0114518	AL-TB vs. Ctrl	Module 2
ENSG00000185155	MIXL1	2.77099	1.04039e-07	1.23829e-05	L-TB vs. Ctrl	Module 1
ENSG00000185245	GP1BA	1.64255	8.22795e-05	0.00241218	L-TB vs. Ctrl	Module 1
ENSG00000185522	C11orf35	-1.81942	4.6817e-06	0.000272709	L-TB vs. Ctrl	Module 3
ENSG00000185742	C11orf87	-2.9715	0.00162614	0.0220654	L-TB vs. Ctrl	Module 3
ENSG00000185862	EVI2B	1.69968	4.49288e-05	0.00154409	L-TB vs. Ctrl	Module 1
ENSG00000185862	EVI2B	1.66485	0.000207433	0.00600924	AL-TB vs. Ctrl	Module 1
ENSG00000185897	FFAR3	3.24908	0.00408939	0.0434487	AL-TB vs. Ctrl	Module 1
ENSG00000185897	FFAR3	3.05133	0.0024044	0.0287795	L-TB vs. Ctrl	Module 1
ENSG00000186160	CYP4Z1	-1.91608	5.67639e-05	0.00184041	L-TB vs. Ctrl	Module 3
ENSG00000186265	BTLA	1.80405	8.73158e-05	0.00251642	L-TB vs. Ctrl	Module 1
ENSG00000186326	RGS9BP	-2.43885	0.00119612	0.0177475	L-TB vs. Ctrl	Module 3
ENSG00000186340	THBS2	1.69488	0.000272709	0.00598699	L-TB vs. Ctrl	Module 4
ENSG00000186340	THBS2	2.35079	2.39881e-09	2.41663e-06	L-TB vs. AL-TB	Module 4
ENSG00000186431	FCAR	3.0914	1.7807e-05	0.000766176	L-TB vs. Ctrl	Module 2
ENSG00000186431	FCAR	3.55717	1.00326e-06	0.000122844	AL-TB vs. Ctrl	Module 2
ENSG00000186493	C5orf38	-1.64497	0.0029955	0.0333705	L-TB vs. Ctrl	Module 3
ENSG00000186529	CYP4F3	1.62916	0.0052479	0.0486569	L-TB vs. Ctrl	Module 2
ENSG00000186529	CYP4F3	2.87515	3.8229e-05	0.00178208	AL-TB vs. Ctrl	Module 2
ENSG00000186766	FOXI2	2.15311	0.00280565	0.0319282	L-TB vs. Ctrl	Module 1
ENSG00000186807	ANXA8L2	-1.61733	0.00233067	0.028204	L-TB vs. Ctrl	Module 3
ENSG00000186818	LILRB4	1.96485	6.99039e-05	0.00746912	L-TB vs. AL-TB	Module 1
ENSG00000186818	LILRB4	2.77554	7.47493e-08	9.38427e-06	L-TB vs. Ctrl	Module 1
ENSG00000186831	KRT17P2	3.80489	6.91953e-05	0.00211855	L-TB vs. Ctrl	Module 1
ENSG00000186832	KRT16	2.79956	0.00348911	0.0366405	L-TB vs. Ctrl	Module 1
ENSG00000186891	TNFRSF18	1.87105	0.00286851	0.0324615	L-TB vs. Ctrl	Module 4
ENSG00000187024	PTRH1	1.65098	0.00104021	0.0183468	AL-TB vs. Ctrl	Module 2
ENSG00000187037	GPR141	2.48445	4.77846e-05	0.00162196	L-TB vs. Ctrl	Module 1
ENSG00000187037	GPR141	1.79058	0.00255768	0.0329812	AL-TB vs. Ctrl	Module 1
ENSG00000187094	CCK	-2.25102	0.00314562	0.0343197	L-TB vs. Ctrl	Module 3
ENSG00000187243	MAGED4B	2.10374	0.000473415	0.0264962	L-TB vs. AL-TB	Module 4
ENSG00000187486	KCNJ11	-1.51058	0.00168612	0.022669	L-TB vs. Ctrl	Module 3
ENSG00000187492	CDHR4	-2.39654	0.00104054	0.0160204	L-TB vs. Ctrl	Module 3
ENSG00000187566	NHLRC1	-1.61636	4.17421e-12	6.38886e-09	AL-TB vs. Ctrl	Module 4
ENSG00000187808	SOWAHD	-1.6171	0.00268915	0.0340268	AL-TB vs. Ctrl	Module 4
ENSG00000187821	HELT	-3.51588	0.00203541	0.0258722	L-TB vs. Ctrl	Module 3
ENSG00000187821	HELT	-2.75954	0.00242434	0.0318961	AL-TB vs. Ctrl	Module 3
ENSG00000187862	TTC24	2.14024	0.00307196	0.036685	AL-TB vs. Ctrl	Module 1
ENSG00000187862	TTC24	2.86716	3.18962e-06	0.000200218	L-TB vs. Ctrl	Module 1
ENSG00000187912	CLEC17A	4.29362	2.74273e-11	1.1382e-08	L-TB vs. Ctrl	Module 1
ENSG00000187912	CLEC17A	2.46191	0.000371036	0.00901395	AL-TB vs. Ctrl	Module 1
ENSG00000187944	C2orf66	2.02969	0.00240686	0.0317724	AL-TB vs. Ctrl	Module 2
ENSG00000187955	COL14A1	1.61075	1.05165e-05	0.00201803	L-TB vs. AL-TB	Module 1
ENSG00000187990	HIST1H2BG	2.69064	0.000173923	0.00424606	L-TB vs. Ctrl	Module 1
ENSG00000188133	TMEM215	3.9063	0.00116096	0.0173758	L-TB vs. Ctrl	Module 1
ENSG00000188211	NCR3LG1	1.77041	0.00206312	0.0286343	AL-TB vs. Ctrl	Module 2
ENSG00000188279	FAM25C	-2.72306	1.0574e-05	0.000507368	L-TB vs. Ctrl	Module 3
ENSG00000188279	FAM25C	-1.53617	0.000931384	0.0170836	AL-TB vs. Ctrl	Module 3
ENSG00000188282	RUFY4	3.17719	1.04909e-09	2.55253e-07	L-TB vs. Ctrl	Module 1
ENSG00000188282	RUFY4	2.32733	2.54824e-07	4.20383e-05	AL-TB vs. Ctrl	Module 1
ENSG00000188384	CSPG4P8	-2.13366	0.000304252	0.00646953	L-TB vs. Ctrl	Module 3
ENSG00000188384	CSPG4P8	-1.58168	0.00494346	0.0489549	AL-TB vs. Ctrl	Module 3
ENSG00000188388	GOLGA6L3	1.78319	0.00464966	0.0446829	L-TB vs. Ctrl	Module 2
ENSG00000188388	GOLGA6L3	1.80114	0.003407	0.0389149	AL-TB vs. Ctrl	Module 2
ENSG00000188389	PDCD1	1.53899	0.00471047	0.0451096	L-TB vs. Ctrl	Module 1
ENSG00000188394	GPR21	-2.2058	0.00313712	0.0371253	AL-TB vs. Ctrl	Module 4
ENSG00000188404	SELL	2.35381	7.03749e-08	9.08398e-06	L-TB vs. Ctrl	Module 1
ENSG00000188404	SELL	2.15795	6.58386e-06	0.000506674	AL-TB vs. Ctrl	Module 1
ENSG00000188488	SERPINA5	-2.33592	0.00136392	0.0220071	AL-TB vs. Ctrl	Module 4
ENSG00000188505	NCCRP1	2.58283	0.000100539	0.00359058	AL-TB vs. Ctrl	Module 1
ENSG00000188505	NCCRP1	2.95137	5.81952e-06	0.000327932	L-TB vs. Ctrl	Module 1
ENSG00000188659	FAM154B	-1.78388	0.000265821	0.00585615	L-TB vs. Ctrl	Module 3
ENSG00000188659	FAM154B	-1.77755	0.000969558	0.0417546	L-TB vs. AL-TB	Module 3
ENSG00000188747	NOXA1	-1.57541	0.00274865	0.0345147	AL-TB vs. Ctrl	Module 4
ENSG00000188760	TMEM198	-1.64912	0.00110553	0.0190456	AL-TB vs. Ctrl	Module 4
ENSG00000188763	FZD9	-1.87656	0.00466249	0.0472248	AL-TB vs. Ctrl	Module 3
ENSG00000188763	FZD9	-2.21571	0.00130812	0.0189691	L-TB vs. Ctrl	Module 3
ENSG00000188778	ADRB3	-2.18582	0.00234339	0.0312641	AL-TB vs. Ctrl	Module 4
ENSG00000188820	FAM26F	1.52855	0.000971589	0.015282	L-TB vs. Ctrl	Module 1
ENSG00000188822	CNR2	2.85356	3.40944e-08	4.8622e-06	L-TB vs. Ctrl	Module 1
ENSG00000188859	FAM78B	1.52871	3.84313e-08	5.41862e-06	L-TB vs. Ctrl	Module 1
ENSG00000188883	KLRG2	-2.39355	1.15657e-05	0.000541736	L-TB vs. Ctrl	Module 3
ENSG00000188883	KLRG2	-1.96466	0.00114411	0.0465671	L-TB vs. AL-TB	Module 3
ENSG00000188886	ASTL	3.2276	4.01556e-05	0.0014209	L-TB vs. Ctrl	Module 1
ENSG00000188886	ASTL	3.15438	4.89678e-05	0.00214819	AL-TB vs. Ctrl	Module 1
ENSG00000189001	SBSN	3.09412	0.000998085	0.0155846	L-TB vs. Ctrl	Module 1
ENSG00000189136	UBE2Q2P1	2.07844	2.16938e-05	0.00121062	AL-TB vs. Ctrl	Module 2
ENSG00000189167	ZAR1L	3.54212	0.000454281	0.00870991	L-TB vs. Ctrl	Module 1
ENSG00000189223	PAX8-AS1	-1.50367	0.000129918	0.00338567	L-TB vs. Ctrl	Module 3
ENSG00000189233	NUGGC	1.96788	1.24248e-07	1.44749e-05	L-TB vs. Ctrl	Module 1
ENSG00000189398	OR7E12P	1.96881	0.00285704	0.0352345	AL-TB vs. Ctrl	Module 2
ENSG00000189410	SH2D5	-2.40523	0.00134035	0.0192538	L-TB vs. Ctrl	Module 3
ENSG00000189410	SH2D5	-2.10925	0.00471584	0.0475207	AL-TB vs. Ctrl	Module 3
ENSG00000196092	PAX5	4.75571	1.28434e-22	1.76558e-18	L-TB vs. Ctrl	Module 1
ENSG00000196092	PAX5	1.9461	0.000452169	0.0257672	L-TB vs. AL-TB	Module 1
ENSG00000196092	PAX5	2.81634	2.03881e-06	0.000207267	AL-TB vs. Ctrl	Module 1
ENSG00000196136	SERPINA3	2.44741	0.00022139	0.00511157	L-TB vs. Ctrl	Module 2
ENSG00000196136	SERPINA3	3.24387	5.06806e-06	0.000419294	AL-TB vs. Ctrl	Module 2
ENSG00000196366	C9orf163	-2.52284	0.000189856	0.00454696	L-TB vs. Ctrl	Module 3
ENSG00000196366	C9orf163	-2.62118	4.64814e-06	0.000388049	AL-TB vs. Ctrl	Module 3
ENSG00000196428	TSC22D2	1.69066	1.13593e-08	3.06812e-06	AL-TB vs. Ctrl	Module 2
ENSG00000196460	RFX8	1.53551	5.44864e-05	0.00642678	L-TB vs. AL-TB	Module 4
ENSG00000196550	FAM72A	1.99091	9.54003e-08	1.82519e-05	AL-TB vs. Ctrl	Module 2
ENSG00000196550	FAM72A	1.68272	3.63313e-07	3.44448e-05	L-TB vs. Ctrl	Module 2
ENSG00000196562	SULF2	1.58517	6.92326e-08	8.97869e-06	L-TB vs. Ctrl	Module 1
ENSG00000196611	MMP1	2.75873	5.78882e-05	0.00665016	L-TB vs. AL-TB	Module 4
ENSG00000196611	MMP1	2.62208	6.10955e-05	0.00194417	L-TB vs. Ctrl	Module 4
ENSG00000196668	LINC00173	1.51934	0.00216827	0.029598	AL-TB vs. Ctrl	Module 1
ENSG00000196927	AC009093.1	1.94238	6.66817e-05	0.00269367	AL-TB vs. Ctrl	Module 2
ENSG00000197046	SIGLEC15	2.27454	7.00648e-05	0.0021404	L-TB vs. Ctrl	Module 1
ENSG00000197106	SLC6A17	2.78387	0.00108929	0.0166106	L-TB vs. Ctrl	Module 1
ENSG00000197146	AL133458.1	1.57021	4.91449e-05	0.00165384	L-TB vs. Ctrl	Module 1
ENSG00000197168	NEK5	1.72292	0.00485149	0.0483395	AL-TB vs. Ctrl	Module 2
ENSG00000197320	AC060834.2	2.12159	0.00200121	0.0281868	AL-TB vs. Ctrl	Module 2
ENSG00000197320	AC060834.2	1.66125	0.00187345	0.024428	L-TB vs. Ctrl	Module 2
ENSG00000197329	PELI1	1.75823	7.22697e-07	9.68431e-05	AL-TB vs. Ctrl	Module 2
ENSG00000197360	ZNF98	-2.19044	0.00466221	0.0472248	AL-TB vs. Ctrl	Module 4
ENSG00000197409	HIST1H3D	2.77917	4.86289e-05	0.00606958	L-TB vs. AL-TB	Module 4
ENSG00000197421	GGT3P	-2.05556	0.00010629	0.00289658	L-TB vs. Ctrl	Module 3
ENSG00000197459	HIST1H2BH	2.61368	0.000712939	0.0347333	L-TB vs. AL-TB	Module 4
ENSG00000197479	PCDHB11	2.01333	0.00346781	0.0393746	AL-TB vs. Ctrl	Module 2
ENSG00000197506	SLC28A3	1.84049	0.000945813	0.0412357	L-TB vs. AL-TB	Module 4
ENSG00000197520	FAM177B	2.56551	1.9646e-08	3.02327e-06	L-TB vs. Ctrl	Module 1
ENSG00000197549	PRAMENP	6.00233	2.49133e-08	3.74298e-06	L-TB vs. Ctrl	Module 1
ENSG00000197549	PRAMENP	2.89285	0.000528918	0.0287471	L-TB vs. AL-TB	Module 1
ENSG00000197653	DNAH10	-1.8924	0.000320465	0.00671559	L-TB vs. Ctrl	Module 3
ENSG00000197670	RP4-724E16.2	2.64564	0.000121423	0.00417919	AL-TB vs. Ctrl	Module 1
ENSG00000197670	RP4-724E16.2	2.33237	7.73945e-05	0.00230042	L-TB vs. Ctrl	Module 1
ENSG00000197705	KLHL14	1.59734	0.000989244	0.0154888	L-TB vs. Ctrl	Module 1
ENSG00000197714	ZNF460	1.63911	0.000140752	0.00454066	AL-TB vs. Ctrl	Module 2
ENSG00000197714	ZNF460	1.62714	0.000191999	0.00459028	L-TB vs. Ctrl	Module 2
ENSG00000197723	HSPB9	-2.16845	0.00296753	0.0331394	L-TB vs. Ctrl	Module 3
ENSG00000197757	HOXC6	1.86313	0.000767911	0.0363444	L-TB vs. AL-TB	Module 4
ENSG00000197768	C9orf173	-1.68881	3.89549e-05	0.00180068	AL-TB vs. Ctrl	Module 4
ENSG00000197992	CLEC9A	1.69964	2.2063e-05	0.000907074	L-TB vs. Ctrl	Module 1
ENSG00000198010	DLGAP2	1.91168	0.000563816	0.029982	L-TB vs. AL-TB	Module 4
ENSG00000198203	SULT1C2	1.57611	1.58891e-05	0.000703471	L-TB vs. Ctrl	Module 1
ENSG00000198216	CACNA1E	2.59925	2.27794e-05	0.000928298	L-TB vs. Ctrl	Module 1
ENSG00000198286	CARD11	1.61372	1.30339e-07	1.48704e-05	L-TB vs. Ctrl	Module 1
ENSG00000198454	C9orf141	-3.85463	0.00291784	0.0327977	L-TB vs. Ctrl	Module 3
ENSG00000198488	B3GNT6	3.43857	0.00102014	0.0158016	L-TB vs. Ctrl	Module 2
ENSG00000198488	B3GNT6	5.24524	6.58651e-06	0.000506674	AL-TB vs. Ctrl	Module 2
ENSG00000198518	HIST1H4E	1.71797	6.3158e-05	0.00198908	L-TB vs. Ctrl	Module 1
ENSG00000198535	C2CD4A	2.33044	0.0010294	0.0182262	AL-TB vs. Ctrl	Module 2
ENSG00000198535	C2CD4A	1.95686	0.00302651	0.0335798	L-TB vs. Ctrl	Module 2
ENSG00000198604	BAZ1A	1.70973	1.7921e-06	0.000190626	AL-TB vs. Ctrl	Module 2
ENSG00000198727	MT-CYB	1.6445	0.000233524	0.00532822	L-TB vs. Ctrl	Module 1
ENSG00000198734	F5	1.88028	0.000374129	0.00905118	AL-TB vs. Ctrl	Module 1
ENSG00000198763	MT-ND2	1.62223	0.000658997	0.0114312	L-TB vs. Ctrl	Module 1
ENSG00000198768	APCDD1L	3.72913	3.44073e-05	0.00470158	L-TB vs. AL-TB	Module 4
ENSG00000198786	MT-ND5	2.13864	2.81011e-05	0.00143901	AL-TB vs. Ctrl	Module 1
ENSG00000198794	SCAMP5	1.50357	0.000636168	0.0322388	L-TB vs. AL-TB	Module 4
ENSG00000198796	ALPK2	2.38109	0.000412799	0.00972018	AL-TB vs. Ctrl	Module 1
ENSG00000198796	ALPK2	2.00431	0.00044406	0.0254078	L-TB vs. AL-TB	Module 1
ENSG00000198796	ALPK2	4.40975	2.21288e-12	1.38275e-09	L-TB vs. Ctrl	Module 1
ENSG00000198797	BRINP2	-2.9716	0.00395845	0.040086	L-TB vs. Ctrl	Module 3
ENSG00000198797	BRINP2	-2.48711	0.00186412	0.026804	AL-TB vs. Ctrl	Module 3
ENSG00000198851	CD3E	1.51742	3.61955e-07	5.60216e-05	AL-TB vs. Ctrl	Module 1
ENSG00000198851	CD3E	1.9635	8.96027e-11	3.1184e-08	L-TB vs. Ctrl	Module 1
ENSG00000198886	MT-ND4	1.78549	0.000126717	0.00332122	L-TB vs. Ctrl	Module 1
ENSG00000198899	MT-ATP6	1.65553	0.000330153	0.0068819	L-TB vs. Ctrl	Module 1
ENSG00000198976	MIR429	-2.90435	7.39391e-05	0.00223394	L-TB vs. Ctrl	Module 3
ENSG00000198976	MIR429	-1.83242	0.000989471	0.0177589	AL-TB vs. Ctrl	Module 3
ENSG00000199161	MIR126	-2.18998	0.00231875	0.0281374	L-TB vs. Ctrl	Module 3
ENSG00000199161	MIR126	-2.17719	0.000922261	0.0169755	AL-TB vs. Ctrl	Module 3
ENSG00000199266	SNORA60	-1.99918	0.000490339	0.00920231	L-TB vs. Ctrl	Module 3
ENSG00000199266	SNORA60	-1.63295	0.00464773	0.0471785	AL-TB vs. Ctrl	Module 3
ENSG00000199313	RNU4-82P	3.31949	0.000801409	0.0153752	AL-TB vs. Ctrl	Module 2
ENSG00000199313	RNU4-82P	3.09849	0.00299404	0.0333677	L-TB vs. Ctrl	Module 2
ENSG00000199568	RNU5A-1	2.84755	0.00417121	0.041567	L-TB vs. Ctrl	Module 1
ENSG00000199753	SNORD104	-1.59972	0.00177326	0.0259014	AL-TB vs. Ctrl	Module 4
ENSG00000199899	Y_RNA	-2.68248	0.00101762	0.0157803	L-TB vs. Ctrl	Module 3
ENSG00000200154	SNORD103A	3.34066	0.00101732	0.0157803	L-TB vs. Ctrl	Module 2
ENSG00000200154	SNORD103A	3.34248	0.00348969	0.0395479	AL-TB vs. Ctrl	Module 2
ENSG00000200169	RNU5D-1	3.59485	0.000217458	0.00617079	AL-TB vs. Ctrl	Module 1
ENSG00000200169	RNU5D-1	3.67029	6.08692e-06	0.000336847	L-TB vs. Ctrl	Module 1
ENSG00000200494	Y_RNA	-20.2612	5.04964e-12	6.47455e-09	L-TB vs. AL-TB	Module 2
ENSG00000200494	Y_RNA	19.2059	1.28478e-10	6.20976e-08	AL-TB vs. Ctrl	Module 2
ENSG00000200834	Y_RNA	4.27238	0.00477706	0.0455459	L-TB vs. Ctrl	Module 1
ENSG00000200879	SNORD14E	2.20317	4.12915e-05	0.00145734	L-TB vs. Ctrl	Module 1
ENSG00000201457	SNORA55	2.25122	0.00101864	0.0181118	AL-TB vs. Ctrl	Module 2
ENSG00000201496	RN7SKP275	3.89307	0.00381114	0.0390757	L-TB vs. Ctrl	Module 1
ENSG00000201581	RN7SKP78	2.64787	0.00235884	0.031351	AL-TB vs. Ctrl	Module 1
ENSG00000201581	RN7SKP78	3.31383	0.00121846	0.0179916	L-TB vs. Ctrl	Module 1
ENSG00000201699	RNU1-59P	2.85346	0.00212468	0.0266984	L-TB vs. Ctrl	Module 1
ENSG00000201839	SNORD114-3	3.93001	0.000806769	0.0133542	L-TB vs. Ctrl	Module 1
ENSG00000201839	SNORD114-3	4.49429	0.000743985	0.0145988	AL-TB vs. Ctrl	Module 1
ENSG00000201900	Y_RNA	3.41152	0.000740884	0.0124923	L-TB vs. Ctrl	Module 1
ENSG00000201900	Y_RNA	2.89113	0.000539932	0.0116031	AL-TB vs. Ctrl	Module 1
ENSG00000202019	Y_RNA	3.33659	0.00166114	0.0249397	AL-TB vs. Ctrl	Module 2
ENSG00000202078	Y_RNA	3.05805	0.000217489	0.00617079	AL-TB vs. Ctrl	Module 1
ENSG00000202078	Y_RNA	3.02089	3.39495e-05	0.00124123	L-TB vs. Ctrl	Module 1
ENSG00000202198	RN7SK	3.42748	8.36121e-06	0.000428887	L-TB vs. Ctrl	Module 4
ENSG00000202318	Y_RNA	4.18648	1.3978e-08	2.28757e-06	L-TB vs. Ctrl	Module 2
ENSG00000202318	Y_RNA	5.20076	1.29535e-14	5.94783e-11	AL-TB vs. Ctrl	Module 2
ENSG00000202398	RNU6-61P	-20.2612	5.04964e-12	6.47455e-09	L-TB vs. AL-TB	Module 2
ENSG00000202398	RNU6-61P	19.2059	1.28478e-10	6.20976e-08	AL-TB vs. Ctrl	Module 2
ENSG00000202415	RN7SKP269	2.6196	0.00377598	0.0388681	L-TB vs. Ctrl	Module 1
ENSG00000202461	Y_RNA	1.91335	0.00347854	0.0365592	L-TB vs. Ctrl	Module 1
ENSG00000203276	AL353898.2	1.86287	0.00268961	0.0340268	AL-TB vs. Ctrl	Module 1
ENSG00000203346	AL162458.1	3.38347	0.000971197	0.015282	L-TB vs. Ctrl	Module 1
ENSG00000203364	RP11-370F5.4	-3.93505	0.000171114	0.00518042	AL-TB vs. Ctrl	Module 4
ENSG00000203430	AC140061.10	19.2059	1.28478e-10	6.20976e-08	AL-TB vs. Ctrl	Module 2
ENSG00000203430	AC140061.10	-20.2612	5.04964e-12	6.47455e-09	L-TB vs. AL-TB	Module 2
ENSG00000203499	FAM83H-AS1	-1.89097	9.712e-08	1.17631e-05	L-TB vs. Ctrl	Module 3
ENSG00000203518	AL023807.1	3.5478	0.0027168	0.0312273	L-TB vs. Ctrl	Module 2
ENSG00000203688	RP11-351J23.1	2.60483	0.0045719	0.0467968	AL-TB vs. Ctrl	Module 2
ENSG00000203804	ADAMTSL4-AS1	1.64385	0.000776056	0.0129314	L-TB vs. Ctrl	Module 2
ENSG00000203804	ADAMTSL4-AS1	1.74311	0.000135955	0.00447801	AL-TB vs. Ctrl	Module 2
ENSG00000203805	PPAPDC1A	2.66715	0.000535828	0.0290666	L-TB vs. AL-TB	Module 4
ENSG00000203930	LINC00632	1.81107	0.00181609	0.0263178	AL-TB vs. Ctrl	Module 2
ENSG00000203930	LINC00632	-1.56101	0.000197036	0.0147037	L-TB vs. AL-TB	Module 2
ENSG00000203995	ZYG11A	3.25958	4.25258e-06	0.000251442	L-TB vs. Ctrl	Module 1
ENSG00000204020	LIPN	2.54974	0.00104485	0.0184168	AL-TB vs. Ctrl	Module 2
ENSG00000204044	RP11-465L10.10	2.81253	0.00200791	0.0282523	AL-TB vs. Ctrl	Module 2
ENSG00000204086	RPA4	1.78628	0.00423558	0.042012	L-TB vs. Ctrl	Module 1
ENSG00000204131	NHSL2	1.62434	0.00497459	0.0467678	L-TB vs. Ctrl	Module 2
ENSG00000204152	TIMM23B	1.86298	0.0030881	0.0340161	L-TB vs. Ctrl	Module 1
ENSG00000204175	GPRIN2	-2.10728	3.29633e-05	0.00121476	L-TB vs. Ctrl	Module 3
ENSG00000204267	TAP2	4.04651	0.00244671	0.0320985	AL-TB vs. Ctrl	Module 2
ENSG00000204277	RP11-219G17.4	2.09189	0.000844816	0.0383743	L-TB vs. AL-TB	Module 4
ENSG00000204287	HLA-DRA	3.43858	0.00175919	0.0234015	L-TB vs. Ctrl	Module 2
ENSG00000204291	COL15A1	1.62721	0.000180363	0.00436908	L-TB vs. Ctrl	Module 1
ENSG00000204335	SP5	-3.13078	1.22705e-06	9.21862e-05	L-TB vs. Ctrl	Module 3
ENSG00000204335	SP5	-2.01436	3.20221e-06	0.000293283	AL-TB vs. Ctrl	Module 3
ENSG00000204361	NXPE2	2.15416	0.00470684	0.0474646	AL-TB vs. Ctrl	Module 2
ENSG00000204380	AC005042.4	2.05659	9.69562e-06	0.000478435	L-TB vs. Ctrl	Module 1
ENSG00000204463	BAG6	3.3213	5.39163e-05	0.0023101	AL-TB vs. Ctrl	Module 2
ENSG00000204466	DGKK	-2.49857	0.000670341	0.0332905	L-TB vs. AL-TB	Module 2
ENSG00000204533	AC024580.1	1.6018	0.00419433	0.0440963	AL-TB vs. Ctrl	Module 2
ENSG00000204775	KM-PA-2	-2.4519	0.00372927	0.0410637	AL-TB vs. Ctrl	Module 3
ENSG00000204805	FAM27E4	-3.09883	0.000209834	0.00604433	AL-TB vs. Ctrl	Module 4
ENSG00000204860	FAM201A	-2.05529	1.31902e-05	0.000605427	L-TB vs. Ctrl	Module 3
ENSG00000204978	C19orf69	2.95426	2.18775e-06	0.000218379	AL-TB vs. Ctrl	Module 2
ENSG00000205020	CCL4L1	2.77049	0.00368176	0.0382094	L-TB vs. Ctrl	Module 1
ENSG00000205056	RP11-693J15.5	2.45506	4.84459e-05	0.00606958	L-TB vs. AL-TB	Module 1
ENSG00000205056	RP11-693J15.5	4.08223	1.14278e-08	1.92758e-06	L-TB vs. Ctrl	Module 1
ENSG00000205097	FRG2	-20.2612	5.04964e-12	6.47455e-09	L-TB vs. AL-TB	Module 2
ENSG00000205246	RPSAP58	1.67177	0.000236412	0.0165222	L-TB vs. AL-TB	Module 4
ENSG00000205281	GOLGA6L10	2.36636	0.002034	0.0284375	AL-TB vs. Ctrl	Module 2
ENSG00000205358	MT1H	3.72595	0.000215437	0.00501728	L-TB vs. Ctrl	Module 1
ENSG00000205414	RP11-401P9.6	1.65667	0.00384204	0.0418207	AL-TB vs. Ctrl	Module 2
ENSG00000205420	KRT6A	-3.79359	7.99137e-05	0.00307919	AL-TB vs. Ctrl	Module 4
ENSG00000205502	C2CD4B	2.55202	6.73575e-05	0.00271301	AL-TB vs. Ctrl	Module 2
ENSG00000205502	C2CD4B	2.01353	0.000338067	0.00701511	L-TB vs. Ctrl	Module 2
ENSG00000205592	MUC19	-2.04373	0.0053466	0.049213	L-TB vs. Ctrl	Module 2
ENSG00000205595	AREGB	3.1892	2.416e-05	0.00130001	AL-TB vs. Ctrl	Module 2
ENSG00000205595	AREGB	3.43548	1.32407e-06	9.76402e-05	L-TB vs. Ctrl	Module 2
ENSG00000205683	DPF3	1.6023	1.39523e-05	0.000634056	L-TB vs. Ctrl	Module 1
ENSG00000205898	RP11-3B12.4	3.53309	0.000864644	0.0388364	L-TB vs. AL-TB	Module 4
ENSG00000205940	HSP90AB2P	2.72742	0.00486242	0.0460673	L-TB vs. Ctrl	Module 1
ENSG00000206077	ZDHHC11B	-1.56607	0.000182108	0.0140645	L-TB vs. AL-TB	Module 2
ENSG00000206113	RP11-503N18.1	-2.29971	0.000236746	0.00536169	L-TB vs. Ctrl	Module 3
ENSG00000206113	RP11-503N18.1	-2.32166	0.000712203	0.0347333	L-TB vs. AL-TB	Module 3
ENSG00000206129	CTD-2008L17.2	3.11019	0.00507159	0.049734	AL-TB vs. Ctrl	Module 2
ENSG00000206129	CTD-2008L17.2	3.37747	0.00140054	0.0199205	L-TB vs. Ctrl	Module 2
ENSG00000206195	AP000525.9	2.83507	9.77051e-07	7.59932e-05	L-TB vs. Ctrl	Module 1
ENSG00000206195	AP000525.9	1.96671	3.45018e-05	0.00470158	L-TB vs. AL-TB	Module 1
ENSG00000206549	PRSS50	-1.52564	0.00121637	0.0203097	AL-TB vs. Ctrl	Module 3
ENSG00000206557	TRIM71	-1.63405	0.00340422	0.0361233	L-TB vs. Ctrl	Module 3
ENSG00000206582	Y_RNA	4.18951	4.12097e-05	0.00188183	AL-TB vs. Ctrl	Module 2
ENSG00000206599	RNU6-841P	-20.2612	5.04964e-12	6.47455e-09	L-TB vs. AL-TB	Module 2
ENSG00000206599	RNU6-841P	19.2059	1.28478e-10	6.20976e-08	AL-TB vs. Ctrl	Module 2
ENSG00000206612	SNORA2A	2.22409	0.0037754	0.0413962	AL-TB vs. Ctrl	Module 2
ENSG00000206633	SNORA80B	3.48858	0.000545073	0.011668	AL-TB vs. Ctrl	Module 2
ENSG00000206881	RNU6-190P	3.5638	0.00331367	0.0383579	AL-TB vs. Ctrl	Module 2
ENSG00000207039	Y_RNA	4.85623	5.19544e-05	0.00225764	AL-TB vs. Ctrl	Module 2
ENSG00000207185	RNU6-1157P	3.75265	0.000112614	0.00301481	L-TB vs. Ctrl	Module 1
ENSG00000207185	RNU6-1157P	3.4067	0.00332085	0.0384048	AL-TB vs. Ctrl	Module 1
ENSG00000207205	RNVU1-15	2.63623	0.00432618	0.045044	AL-TB vs. Ctrl	Module 1
ENSG00000207205	RNVU1-15	3.3617	0.000447378	0.00861359	L-TB vs. Ctrl	Module 1
ENSG00000207258	Y_RNA	2.73924	0.00219243	0.0298721	AL-TB vs. Ctrl	Module 1
ENSG00000207258	Y_RNA	3.88353	9.94478e-05	0.00276463	L-TB vs. Ctrl	Module 1
ENSG00000207361	RNU6-178P	18.5928	2.36366e-10	1.10371e-07	AL-TB vs. Ctrl	Module 2
ENSG00000207399	RNU6-1011P	2.82742	0.000758234	0.0127193	L-TB vs. Ctrl	Module 1
ENSG00000207491	RNU6-423P	3.60612	0.000793601	0.0152467	AL-TB vs. Ctrl	Module 2
ENSG00000207491	RNU6-423P	3.52615	0.00178145	0.0235789	L-TB vs. Ctrl	Module 2
ENSG00000207501	RNVU1-14	2.23816	0.00251173	0.0326099	AL-TB vs. Ctrl	Module 1
ENSG00000207501	RNVU1-14	2.57231	6.1745e-05	0.00195786	L-TB vs. Ctrl	Module 1
ENSG00000207525	Y_RNA	3.60585	0.00318862	0.0346513	L-TB vs. Ctrl	Module 1
ENSG00000207721	MIR186	-2.85919	0.00222872	0.02754	L-TB vs. Ctrl	Module 3
ENSG00000207725	MIR222	-2.82695	0.00119605	0.0481973	L-TB vs. AL-TB	Module 2
ENSG00000207870	MIR221	1.82675	0.0035726	0.0400754	AL-TB vs. Ctrl	Module 2
ENSG00000207973	MIR589	-2.71231	0.0022457	0.0303577	AL-TB vs. Ctrl	Module 4
ENSG00000209082	MT-TL1	-4.06079	0.00166466	0.0249653	AL-TB vs. Ctrl	Module 4
ENSG00000210127	MT-TA	-4.38095	0.00368588	0.0408348	AL-TB vs. Ctrl	Module 4
ENSG00000210135	MT-TN	-3.64757	0.00208714	0.0263108	L-TB vs. Ctrl	Module 4
ENSG00000210135	MT-TN	-5.67882	1.33652e-05	0.00084452	AL-TB vs. Ctrl	Module 4
ENSG00000210140	MT-TC	-3.21846	0.00359962	0.0375163	L-TB vs. Ctrl	Module 4
ENSG00000210140	MT-TC	-3.87778	0.000215322	0.00613457	AL-TB vs. Ctrl	Module 4
ENSG00000210151	MT-TS1	-6.49718	3.92225e-05	0.00180699	AL-TB vs. Ctrl	Module 4
ENSG00000210151	MT-TS1	-3.89331	0.00206574	0.0261609	L-TB vs. Ctrl	Module 4
ENSG00000210194	MT-TE	-3.94598	0.00089797	0.014421	L-TB vs. Ctrl	Module 3
ENSG00000210194	MT-TE	-3.29765	0.00492469	0.0488216	AL-TB vs. Ctrl	Module 3
ENSG00000211593	IGKJ5	3.35562	3.05768e-07	3.00425e-05	L-TB vs. Ctrl	Module 1
ENSG00000211593	IGKJ5	2.14621	3.68204e-05	0.00496952	L-TB vs. AL-TB	Module 1
ENSG00000211594	IGKJ4	4.04435	1.19365e-08	1.98899e-06	L-TB vs. Ctrl	Module 1
ENSG00000211594	IGKJ4	2.4666	2.62558e-06	0.000796368	L-TB vs. AL-TB	Module 1
ENSG00000211595	IGKJ3	3.01595	1.15661e-05	0.000541736	L-TB vs. Ctrl	Module 1
ENSG00000211598	IGKV4-1	2.67455	1.54571e-05	0.00269145	L-TB vs. AL-TB	Module 1
ENSG00000211598	IGKV4-1	3.94778	1.53464e-10	4.79469e-08	L-TB vs. Ctrl	Module 1
ENSG00000211599	IGKV5-2	3.95836	1.19467e-06	9.03672e-05	L-TB vs. Ctrl	Module 1
ENSG00000211611	IGKV6-21	2.70721	5.61212e-05	0.00182172	L-TB vs. Ctrl	Module 1
ENSG00000211611	IGKV6-21	2.31513	8.61722e-05	0.00844084	L-TB vs. AL-TB	Module 1
ENSG00000211619	IGKV2-40	4.76332	1.19639e-06	9.03672e-05	L-TB vs. Ctrl	Module 1
ENSG00000211625	IGKV3D-20	2.65813	0.000261269	0.0175473	L-TB vs. AL-TB	Module 1
ENSG00000211625	IGKV3D-20	3.9152	4.44126e-08	6.22999e-06	L-TB vs. Ctrl	Module 1
ENSG00000211630	IGKV1D-13	2.33523	0.00296154	0.0330994	L-TB vs. Ctrl	Module 1
ENSG00000211632	IGKV3D-11	3.05704	1.93336e-05	0.000814025	L-TB vs. Ctrl	Module 4
ENSG00000211632	IGKV3D-11	3.78475	2.30031e-08	1.94193e-05	L-TB vs. AL-TB	Module 4
ENSG00000211637	IGLV4-69	4.00644	1.67941e-08	2.669e-06	L-TB vs. Ctrl	Module 1
ENSG00000211637	IGLV4-69	2.60784	0.000123217	0.0105966	L-TB vs. AL-TB	Module 1
ENSG00000211638	IGLV8-61	2.9596	0.000217141	0.00503805	L-TB vs. Ctrl	Module 1
ENSG00000211639	IGLV4-60	2.45817	0.000832954	0.0136479	L-TB vs. Ctrl	Module 1
ENSG00000211640	IGLV6-57	2.04194	0.000639641	0.0322388	L-TB vs. AL-TB	Module 1
ENSG00000211640	IGLV6-57	3.83573	4.28542e-09	8.53792e-07	L-TB vs. Ctrl	Module 1
ENSG00000211640	IGLV6-57	1.79448	0.00107227	0.0186851	AL-TB vs. Ctrl	Module 1
ENSG00000211645	IGLV1-50	2.97774	0.00506368	0.0474347	L-TB vs. Ctrl	Module 1
ENSG00000211647	IGLV5-48	4.57912	1.49874e-05	0.000671625	L-TB vs. Ctrl	Module 1
ENSG00000211648	IGLV1-47	2.40376	0.000203973	0.0148798	L-TB vs. AL-TB	Module 1
ENSG00000211648	IGLV1-47	4.13234	1.93954e-10	5.73394e-08	L-TB vs. Ctrl	Module 1
ENSG00000211649	IGLV7-46	2.41064	5.31508e-05	0.00632606	L-TB vs. AL-TB	Module 1
ENSG00000211649	IGLV7-46	2.75506	6.41301e-05	0.00200591	L-TB vs. Ctrl	Module 1
ENSG00000211650	IGLV5-45	3.46361	0.000233311	0.00532778	L-TB vs. Ctrl	Module 1
ENSG00000211650	IGLV5-45	2.1526	0.000854522	0.038571	L-TB vs. AL-TB	Module 1
ENSG00000211651	IGLV1-44	3.74045	7.81606e-11	2.82756e-08	L-TB vs. Ctrl	Module 1
ENSG00000211651	IGLV1-44	2.38579	1.37137e-05	0.00247647	L-TB vs. AL-TB	Module 1
ENSG00000211652	IGLV7-43	3.67848	2.48896e-06	0.000165293	L-TB vs. Ctrl	Module 1
ENSG00000211652	IGLV7-43	2.52797	8.12539e-05	0.00815662	L-TB vs. AL-TB	Module 1
ENSG00000211653	IGLV1-40	2.86294	1.86038e-05	0.00306887	L-TB vs. AL-TB	Module 1
ENSG00000211653	IGLV1-40	4.21398	1.25546e-09	2.90064e-07	L-TB vs. Ctrl	Module 1
ENSG00000211655	IGLV1-36	4.39403	9.21116e-08	1.12556e-05	L-TB vs. Ctrl	Module 1
ENSG00000211655	IGLV1-36	2.59644	0.00225598	0.0304669	AL-TB vs. Ctrl	Module 1
ENSG00000211658	IGLV3-27	2.95975	6.45958e-05	0.00201818	L-TB vs. Ctrl	Module 1
ENSG00000211659	IGLV3-25	3.10578	7.13108e-07	6.01417e-05	L-TB vs. Ctrl	Module 1
ENSG00000211660	IGLV2-23	3.61427	2.00904e-07	2.11174e-05	L-TB vs. Ctrl	Module 1
ENSG00000211660	IGLV2-23	2.25182	0.000227639	0.0161744	L-TB vs. AL-TB	Module 1
ENSG00000211662	IGLV3-21	3.88617	8.83783e-07	7.08417e-05	L-TB vs. Ctrl	Module 1
ENSG00000211662	IGLV3-21	2.42425	0.000908021	0.0403998	L-TB vs. AL-TB	Module 1
ENSG00000211663	IGLV3-19	3.68207	1.03983e-07	1.23829e-05	L-TB vs. Ctrl	Module 1
ENSG00000211663	IGLV3-19	2.57971	6.01289e-06	0.00145063	L-TB vs. AL-TB	Module 1
ENSG00000211664	IGLV2-18	2.58576	0.000893862	0.0143849	L-TB vs. Ctrl	Module 1
ENSG00000211665	IGLV3-16	3.1035	0.000185419	0.0142128	L-TB vs. AL-TB	Module 4
ENSG00000211666	IGLV2-14	3.11165	4.89102e-07	4.39456e-05	L-TB vs. Ctrl	Module 1
ENSG00000211668	IGLV2-11	3.23348	5.97518e-07	5.18239e-05	L-TB vs. Ctrl	Module 1
ENSG00000211669	IGLV3-10	3.67283	1.02187e-08	1.75596e-06	L-TB vs. Ctrl	Module 1
ENSG00000211670	IGLV3-9	4.48877	4.65054e-07	4.21435e-05	L-TB vs. Ctrl	Module 1
ENSG00000211671	IGLV2-8	3.13987	1.14143e-06	8.71734e-05	L-TB vs. Ctrl	Module 1
ENSG00000211671	IGLV2-8	1.64065	0.00403148	0.0429994	AL-TB vs. Ctrl	Module 1
ENSG00000211673	IGLV3-1	2.98775	1.83884e-05	0.000787492	L-TB vs. Ctrl	Module 1
ENSG00000211673	IGLV3-1	2.43721	0.000105216	0.00953708	L-TB vs. AL-TB	Module 1
ENSG00000211677	IGLC2	2.56445	7.73215e-08	4.74149e-05	L-TB vs. AL-TB	Module 1
ENSG00000211677	IGLC2	3.93169	3.61569e-12	2.07104e-09	L-TB vs. Ctrl	Module 1
ENSG00000211679	IGLC3	1.56708	0.000780528	0.0151352	AL-TB vs. Ctrl	Module 1
ENSG00000211679	IGLC3	2.39537	1.59803e-07	8.34761e-05	L-TB vs. AL-TB	Module 1
ENSG00000211679	IGLC3	3.93462	9.88836e-16	2.26559e-12	L-TB vs. Ctrl	Module 1
ENSG00000211685	IGLC7	2.68232	4.31725e-05	0.00149916	L-TB vs. Ctrl	Module 1
ENSG00000211685	IGLC7	2.57308	9.92561e-06	0.00199297	L-TB vs. AL-TB	Module 1
ENSG00000211701	TRGV1	4.04959	0.00526066	0.0487484	L-TB vs. Ctrl	Module 1
ENSG00000211746	TRBV19	1.64364	0.0038132	0.0390757	L-TB vs. Ctrl	Module 1
ENSG00000211747	TRBV20-1	1.55428	0.00250791	0.0295933	L-TB vs. Ctrl	Module 1
ENSG00000211749	TRBV23-1	1.99425	0.00376453	0.0413363	AL-TB vs. Ctrl	Module 1
ENSG00000211749	TRBV23-1	2.3972	6.77513e-05	0.00208886	L-TB vs. Ctrl	Module 1
ENSG00000211753	TRBV28	2.08782	3.43645e-05	0.00125307	L-TB vs. Ctrl	Module 1
ENSG00000211772	TRBC2	1.83267	9.9887e-09	1.72723e-06	L-TB vs. Ctrl	Module 1
ENSG00000211788	TRAV13-1	1.73836	0.00229692	0.0280051	L-TB vs. Ctrl	Module 1
ENSG00000211792	TRAV14DV4	2.23213	0.0028177	0.0349756	AL-TB vs. Ctrl	Module 1
ENSG00000211796	TRAV16	2.27625	0.00480111	0.0456911	L-TB vs. Ctrl	Module 1
ENSG00000211799	TRAV19	1.93761	8.27954e-05	0.00241785	L-TB vs. Ctrl	Module 1
ENSG00000211807	TRAV26-1	2.06481	0.00447554	0.0436891	L-TB vs. Ctrl	Module 1
ENSG00000211817	TRAV38-2DV8	2.59105	0.00326969	0.0352701	L-TB vs. Ctrl	Module 1
ENSG00000211818	TRAV39	1.82912	9.80053e-05	0.00915409	L-TB vs. AL-TB	Module 4
ENSG00000211887	TRAJ2	3.56535	0.00350113	0.0367265	L-TB vs. Ctrl	Module 1
ENSG00000211890	IGHA2	2.2672	1.32547e-05	0.000840491	AL-TB vs. Ctrl	Module 1
ENSG00000211890	IGHA2	3.65959	6.66373e-16	1.83213e-12	L-TB vs. Ctrl	Module 1
ENSG00000211891	IGHE	3.64467	6.70467e-05	0.00725876	L-TB vs. AL-TB	Module 4
ENSG00000211891	IGHE	3.33721	0.00311892	0.0341772	L-TB vs. Ctrl	Module 4
ENSG00000211892	IGHG4	5.85486	9.19221e-13	7.0203e-10	L-TB vs. Ctrl	Module 1
ENSG00000211892	IGHG4	4.29912	9.55656e-08	5.73556e-05	L-TB vs. AL-TB	Module 1
ENSG00000211893	IGHG2	2.44951	4.66803e-05	0.00593134	L-TB vs. AL-TB	Module 1
ENSG00000211893	IGHG2	2.48726	2.03803e-05	0.0011554	AL-TB vs. Ctrl	Module 1
ENSG00000211893	IGHG2	4.92348	9.14851e-18	3.59327e-14	L-TB vs. Ctrl	Module 1
ENSG00000211895	IGHA1	3.58932	4.31367e-15	7.41249e-12	L-TB vs. Ctrl	Module 1
ENSG00000211895	IGHA1	2.01264	2.97977e-05	0.00149804	AL-TB vs. Ctrl	Module 1
ENSG00000211895	IGHA1	1.59204	0.000252147	0.0171387	L-TB vs. AL-TB	Module 1
ENSG00000211896	IGHG1	2.09741	5.107e-06	0.000421251	AL-TB vs. Ctrl	Module 1
ENSG00000211896	IGHG1	2.84771	2.68395e-08	2.16311e-05	L-TB vs. AL-TB	Module 1
ENSG00000211896	IGHG1	4.9258	2.00838e-21	1.84062e-17	L-TB vs. Ctrl	Module 1
ENSG00000211897	IGHG3	2.1348	2.28217e-05	0.00351778	L-TB vs. AL-TB	Module 1
ENSG00000211897	IGHG3	1.95439	2.17987e-05	0.00121324	AL-TB vs. Ctrl	Module 1
ENSG00000211897	IGHG3	4.06225	6.36647e-18	2.91733e-14	L-TB vs. Ctrl	Module 1
ENSG00000211899	IGHM	1.69443	3.30156e-05	0.00461375	L-TB vs. AL-TB	Module 1
ENSG00000211899	IGHM	3.2073	8.82529e-14	9.7057e-11	L-TB vs. Ctrl	Module 1
ENSG00000211899	IGHM	1.51512	0.000199536	0.00584189	AL-TB vs. Ctrl	Module 1
ENSG00000211900	IGHJ6	4.249	7.32072e-09	1.32418e-06	L-TB vs. Ctrl	Module 1
ENSG00000211900	IGHJ6	2.95081	4.14329e-07	0.000185514	L-TB vs. AL-TB	Module 1
ENSG00000211931	IGHD2-2	3.65223	0.000382317	0.0231425	L-TB vs. AL-TB	Module 1
ENSG00000211931	IGHD2-2	4.26679	0.000187499	0.00449834	L-TB vs. Ctrl	Module 1
ENSG00000211933	IGHV6-1	2.80677	8.34765e-07	0.000313961	L-TB vs. AL-TB	Module 1
ENSG00000211933	IGHV6-1	4.1983	1.16774e-09	2.79089e-07	L-TB vs. Ctrl	Module 1
ENSG00000211934	IGHV1-2	3.11225	0.000627954	0.0110038	L-TB vs. Ctrl	Module 1
ENSG00000211935	IGHV1-3	2.21484	0.00123104	0.0492556	L-TB vs. AL-TB	Module 1
ENSG00000211935	IGHV1-3	3.52575	3.35398e-05	0.00122952	L-TB vs. Ctrl	Module 1
ENSG00000211936	IGHV4-4	3.58052	0.000414025	0.00973241	AL-TB vs. Ctrl	Module 1
ENSG00000211936	IGHV4-4	4.35814	8.62644e-07	6.97575e-05	L-TB vs. Ctrl	Module 1
ENSG00000211937	IGHV2-5	2.94786	0.000967995	0.0152691	L-TB vs. Ctrl	Module 1
ENSG00000211938	IGHV3-7	3.82502	5.54926e-08	7.47899e-06	L-TB vs. Ctrl	Module 1
ENSG00000211938	IGHV3-7	2.28987	0.000251764	0.0171387	L-TB vs. AL-TB	Module 1
ENSG00000211939	IGHV1-8	3.91225	0.000143033	0.00364463	L-TB vs. Ctrl	Module 1
ENSG00000211940	IGHV3-9	3.53645	6.36611e-05	0.00199701	L-TB vs. Ctrl	Module 1
ENSG00000211941	IGHV3-11	4.31831	4.65979e-07	4.21435e-05	L-TB vs. Ctrl	Module 1
ENSG00000211941	IGHV3-11	2.83978	3.01193e-05	0.00433472	L-TB vs. AL-TB	Module 1
ENSG00000211942	IGHV3-13	3.30506	0.000262099	0.00581142	L-TB vs. Ctrl	Module 1
ENSG00000211943	IGHV3-15	3.0448	1.25747e-06	9.34405e-05	L-TB vs. Ctrl	Module 1
ENSG00000211945	IGHV1-18	4.91768	5.47262e-10	1.46082e-07	L-TB vs. Ctrl	Module 1
ENSG00000211945	IGHV1-18	2.502	0.000247484	0.00676406	AL-TB vs. Ctrl	Module 1
ENSG00000211945	IGHV1-18	2.42345	5.48975e-05	0.00642678	L-TB vs. AL-TB	Module 1
ENSG00000211946	IGHV3-20	3.09872	0.00026633	0.00708242	AL-TB vs. Ctrl	Module 1
ENSG00000211946	IGHV3-20	3.10242	6.74686e-05	0.00208425	L-TB vs. Ctrl	Module 1
ENSG00000211947	IGHV3-21	2.12102	0.00110944	0.0456197	L-TB vs. AL-TB	Module 1
ENSG00000211947	IGHV3-21	4.08668	2.01009e-09	4.35161e-07	L-TB vs. Ctrl	Module 1
ENSG00000211947	IGHV3-21	1.97506	0.00270793	0.0341748	AL-TB vs. Ctrl	Module 1
ENSG00000211949	IGHV3-23	3.71051	3.5712e-09	7.27308e-07	L-TB vs. Ctrl	Module 1
ENSG00000211949	IGHV3-23	1.98132	0.000579653	0.0305053	L-TB vs. AL-TB	Module 1
ENSG00000211949	IGHV3-23	1.73325	0.00441632	0.0456546	AL-TB vs. Ctrl	Module 1
ENSG00000211950	IGHV1-24	3.59947	6.44772e-09	5.86701e-06	L-TB vs. AL-TB	Module 1
ENSG00000211950	IGHV1-24	4.83404	1.64884e-12	1.13333e-09	L-TB vs. Ctrl	Module 1
ENSG00000211951	IGHV2-26	2.12304	0.00220044	0.0299516	AL-TB vs. Ctrl	Module 1
ENSG00000211951	IGHV2-26	5.14972	6.72988e-08	8.81102e-06	L-TB vs. Ctrl	Module 1
ENSG00000211951	IGHV2-26	2.944	4.23614e-05	0.00553208	L-TB vs. AL-TB	Module 1
ENSG00000211952	IGHV4-28	2.95566	0.00113116	0.0171067	L-TB vs. Ctrl	Module 4
ENSG00000211952	IGHV4-28	3.04006	0.000538058	0.0291315	L-TB vs. AL-TB	Module 4
ENSG00000211953	IGHV3-30	2.21667	7.29826e-05	0.00756873	L-TB vs. AL-TB	Module 1
ENSG00000211953	IGHV3-30	3.03439	1.05776e-06	8.12349e-05	L-TB vs. Ctrl	Module 1
ENSG00000211955	IGHV3-33	2.274	0.00180764	0.0238023	L-TB vs. Ctrl	Module 1
ENSG00000211956	IGHV4-34	1.93793	0.00427907	0.0447224	AL-TB vs. Ctrl	Module 1
ENSG00000211956	IGHV4-34	2.03825	0.000656513	0.0327769	L-TB vs. AL-TB	Module 1
ENSG00000211956	IGHV4-34	3.95624	3.25227e-09	6.67298e-07	L-TB vs. Ctrl	Module 1
ENSG00000211959	IGHV4-39	2.49614	0.00010926	0.00975322	L-TB vs. AL-TB	Module 1
ENSG00000211959	IGHV4-39	4.05962	1.01725e-07	1.22133e-05	L-TB vs. Ctrl	Module 1
ENSG00000211962	IGHV1-46	2.61679	0.000294746	0.0193353	L-TB vs. AL-TB	Module 1
ENSG00000211962	IGHV1-46	4.19582	1.90167e-06	0.00013372	L-TB vs. Ctrl	Module 1
ENSG00000211964	IGHV3-48	2.87679	4.44076e-05	0.00153272	L-TB vs. Ctrl	Module 1
ENSG00000211965	IGHV3-49	3.31493	2.92239e-06	0.000187292	L-TB vs. Ctrl	Module 1
ENSG00000211966	IGHV5-51	4.02636	1.6134e-07	1.76027e-05	L-TB vs. Ctrl	Module 1
ENSG00000211966	IGHV5-51	2.29792	0.000189651	0.0143423	L-TB vs. AL-TB	Module 1
ENSG00000211968	IGHV1-58	2.63893	0.00451464	0.0439383	L-TB vs. Ctrl	Module 1
ENSG00000211970	IGHV4-61	3.02265	0.000545687	0.0099227	L-TB vs. Ctrl	Module 1
ENSG00000211972	IGHV3-66	3.49279	1.88104e-05	0.000804314	L-TB vs. Ctrl	Module 1
ENSG00000211973	IGHV1-69	4.36868	3.78479e-07	3.53942e-05	L-TB vs. Ctrl	Module 1
ENSG00000211973	IGHV1-69	2.80833	0.000232916	0.0163842	L-TB vs. AL-TB	Module 1
ENSG00000211974	IGHV2-70	4.27503	3.63315e-07	3.44448e-05	L-TB vs. Ctrl	Module 1
ENSG00000211974	IGHV2-70	2.64947	0.000104061	0.00953039	L-TB vs. AL-TB	Module 1
ENSG00000211976	IGHV3-73	2.62187	0.00434899	0.0427804	L-TB vs. Ctrl	Module 1
ENSG00000211978	IGHV5-78	4.12888	0.00181177	0.0238339	L-TB vs. Ctrl	Module 1
ENSG00000212175	SNORA12	2.35958	0.00462983	0.0470814	AL-TB vs. Ctrl	Module 2
ENSG00000212224	SNORA26	19.2059	1.28478e-10	6.20976e-08	AL-TB vs. Ctrl	Module 2
ENSG00000212224	SNORA26	-20.2612	5.04964e-12	6.47455e-09	L-TB vs. AL-TB	Module 2
ENSG00000212304	SNORD12	-2.07407	0.00253649	0.0328164	AL-TB vs. Ctrl	Module 4
ENSG00000212371	SNORA46	2.43516	0.00160723	0.0218651	L-TB vs. Ctrl	Module 1
ENSG00000212456	RNVU1-13	2.29014	0.00331128	0.0383577	AL-TB vs. Ctrl	Module 2
ENSG00000212493	SNORD19	2.95146	0.00142382	0.0226479	AL-TB vs. Ctrl	Module 2
ENSG00000212541	RNU6-510P	1.88352	0.00444138	0.0458449	AL-TB vs. Ctrl	Module 2
ENSG00000213014	VN2R17P	-2.81688	0.00264592	0.0336675	AL-TB vs. Ctrl	Module 4
ENSG00000213018	AL590762.11	1.73442	5.8335e-05	0.00187405	L-TB vs. Ctrl	Module 1
ENSG00000213089	PDCL3P5	3.04289	1.24624e-09	4.70326e-07	AL-TB vs. Ctrl	Module 2
ENSG00000213089	PDCL3P5	2.8766	2.12468e-09	4.56374e-07	L-TB vs. Ctrl	Module 2
ENSG00000213144	RP11-64B16.2	1.64441	1.82046e-07	3.23572e-05	AL-TB vs. Ctrl	Module 2
ENSG00000213190	MLLT11	1.84434	2.02368e-08	4.80624e-06	AL-TB vs. Ctrl	Module 2
ENSG00000213190	MLLT11	1.82157	4.72526e-08	6.49581e-06	L-TB vs. Ctrl	Module 2
ENSG00000213237	AC008155.1	3.08939	0.00450367	0.0463317	AL-TB vs. Ctrl	Module 2
ENSG00000213500	LAP3P2	2.10538	0.00153755	0.0238242	AL-TB vs. Ctrl	Module 2
ENSG00000213777	CTD-2224J9.8	-1.98268	0.000209903	0.00491993	L-TB vs. Ctrl	Module 3
ENSG00000213943	KRT18P17	-2.61562	0.00310394	0.0340814	L-TB vs. Ctrl	Module 3
ENSG00000214093	RP11-247I13.3	3.06835	2.05472e-05	0.000857247	L-TB vs. Ctrl	Module 1
ENSG00000214239	AL591025.1	2.76806	0.00105485	0.0161842	L-TB vs. Ctrl	Module 2
ENSG00000214239	AL591025.1	3.07631	1.6257e-05	0.000973653	AL-TB vs. Ctrl	Module 2
ENSG00000214491	SEC14L6	-1.6396	3.6469e-06	0.000223812	L-TB vs. Ctrl	Module 3
ENSG00000214548	MEG3	1.77625	7.66209e-08	9.55637e-06	L-TB vs. Ctrl	Module 1
ENSG00000214597	TMEM249	-2.6302	0.000481303	0.0106935	AL-TB vs. Ctrl	Module 4
ENSG00000214691	AC104654.1	-5.01772	0.00182219	0.0239082	L-TB vs. Ctrl	Module 3
ENSG00000214708	AC090616.2	-1.62718	0.00026569	0.00708069	AL-TB vs. Ctrl	Module 3
ENSG00000214708	AC090616.2	-1.76847	0.00232315	0.0281501	L-TB vs. Ctrl	Module 3
ENSG00000214733	RP11-429J17.8	-1.79454	0.0050472	0.0495778	AL-TB vs. Ctrl	Module 3
ENSG00000214776	RP11-726G1.1	2.03975	0.000366489	0.00743086	L-TB vs. Ctrl	Module 1
ENSG00000214900	C14orf182	1.50233	7.84549e-05	0.00303427	AL-TB vs. Ctrl	Module 1
ENSG00000214900	C14orf182	1.9463	1.04786e-07	1.24181e-05	L-TB vs. Ctrl	Module 1
ENSG00000214992	AKAP17BP	2.89088	0.00332679	0.0384128	AL-TB vs. Ctrl	Module 2
ENSG00000215033	AL603965.1	-2.4081	0.000108571	0.00294894	L-TB vs. Ctrl	Module 3
ENSG00000215218	UBE2QL1	2.95995	1.46529e-11	6.49785e-09	L-TB vs. Ctrl	Module 1
ENSG00000215218	UBE2QL1	1.62251	6.0324e-05	0.00680648	L-TB vs. AL-TB	Module 1
ENSG00000215270	LA16c-60H5.7	3.77307	7.39355e-05	0.00761157	L-TB vs. AL-TB	Module 4
ENSG00000215306	AL135998.1	3.37017	0.00139479	0.0198594	L-TB vs. Ctrl	Module 1
ENSG00000215784	FAM72D	1.53799	7.58555e-05	0.00296008	AL-TB vs. Ctrl	Module 2
ENSG00000216364	MRPL42P2	3.93316	0.00442242	0.0433321	L-TB vs. Ctrl	Module 1
ENSG00000216522	AC011718.1	-1.69964	0.00510912	0.0477154	L-TB vs. Ctrl	Module 3
ENSG00000216866	RPS2P55	-2.10904	4.66716e-05	0.00205728	AL-TB vs. Ctrl	Module 4
ENSG00000218073	RP1-13D10.2	1.94566	0.000780515	0.0151352	AL-TB vs. Ctrl	Module 2
ENSG00000218274	RP3-407E4.3	4.741	0.000969664	0.0175521	AL-TB vs. Ctrl	Module 2
ENSG00000219410	RP4-761J14.8	2.14181	0.00341068	0.0361431	L-TB vs. Ctrl	Module 1
ENSG00000219433	RP11-350J20.4	2.38087	0.0039949	0.0427581	AL-TB vs. Ctrl	Module 2
ENSG00000219553	RP1-281H8.3	3.21079	2.29935e-05	0.0012657	AL-TB vs. Ctrl	Module 2
ENSG00000219553	RP1-281H8.3	2.91458	0.000206944	0.00487968	L-TB vs. Ctrl	Module 2
ENSG00000219891	ZSCAN12P1	1.79577	1.53255e-06	0.000168214	AL-TB vs. Ctrl	Module 2
ENSG00000220305	HNRNPH1P1	2.47247	5.97785e-05	0.00251052	AL-TB vs. Ctrl	Module 2
ENSG00000220305	HNRNPH1P1	2.81691	0.000522644	0.00961794	L-TB vs. Ctrl	Module 2
ENSG00000220378	KRT8P42	3.16438	0.00284719	0.0351566	AL-TB vs. Ctrl	Module 2
ENSG00000221520	MIR1285-1	3.62156	6.66818e-06	0.000361788	L-TB vs. Ctrl	Module 1
ENSG00000221536	AC091643.1	19.2059	1.28478e-10	6.20976e-08	AL-TB vs. Ctrl	Module 2
ENSG00000221536	AC091643.1	-20.2612	5.04964e-12	6.47455e-09	L-TB vs. AL-TB	Module 2
ENSG00000221737	MIR548I1	5.27656	2.86861e-06	0.000272518	AL-TB vs. Ctrl	Module 2
ENSG00000221818	EBF2	1.95158	0.000270612	0.00594741	L-TB vs. Ctrl	Module 1
ENSG00000221887	HMSD	-1.55563	0.000512749	0.00950738	L-TB vs. Ctrl	Module 3
ENSG00000221916	C19orf73	-1.59379	0.00474094	0.0477037	AL-TB vs. Ctrl	Module 4
ENSG00000222009	BTBD19	1.74365	2.36153e-12	3.82707e-09	AL-TB vs. Ctrl	Module 2
ENSG00000222009	BTBD19	1.62835	1.19289e-09	2.79089e-07	L-TB vs. Ctrl	Module 2
ENSG00000222033	LINC01124	-1.97774	0.000667153	0.0115344	L-TB vs. Ctrl	Module 3
ENSG00000222046	DCDC2B	-2.28239	7.81326e-06	0.000406083	L-TB vs. Ctrl	Module 3
ENSG00000222724	RNU2-63P	4.08387	0.000258546	0.00575118	L-TB vs. Ctrl	Module 1
ENSG00000222937	SNORD63	1.84586	0.000599205	0.0124967	AL-TB vs. Ctrl	Module 2
ENSG00000223117	RN7SKP296	5.26884	9.90967e-07	0.000122427	AL-TB vs. Ctrl	Module 2
ENSG00000223117	RN7SKP296	5.03206	0.000295221	0.00633632	L-TB vs. Ctrl	Module 2
ENSG00000223223	RN7SKP192	19.237	1.19697e-10	6.20976e-08	AL-TB vs. Ctrl	Module 2
ENSG00000223223	RN7SKP192	-20.3255	4.31538e-12	6.47455e-09	L-TB vs. AL-TB	Module 2
ENSG00000223254	Y_RNA	3.61653	1.68236e-10	7.99123e-08	AL-TB vs. Ctrl	Module 2
ENSG00000223254	Y_RNA	2.19848	0.000246942	0.00555144	L-TB vs. Ctrl	Module 2
ENSG00000223298	RNY3P8	-1.69053	0.00183663	0.0265334	AL-TB vs. Ctrl	Module 4
ENSG00000223350	IGLV9-49	4.76045	3.07047e-07	3.00425e-05	L-TB vs. Ctrl	Module 1
ENSG00000223350	IGLV9-49	4.01931	1.55465e-07	8.27426e-05	L-TB vs. AL-TB	Module 1
ENSG00000223403	MEG9	1.71498	0.000791573	0.0131502	L-TB vs. Ctrl	Module 1
ENSG00000223414	LINC00473	2.57668	0.000996452	0.0155846	L-TB vs. Ctrl	Module 1
ENSG00000223485	RP11-417E7.1	2.30371	0.00319208	0.0346752	L-TB vs. Ctrl	Module 1
ENSG00000223572	CKMT1A	-2.0784	0.000878028	0.0164332	AL-TB vs. Ctrl	Module 4
ENSG00000223612	RP11-289I10.2	1.62687	0.00186984	0.0244033	L-TB vs. Ctrl	Module 1
ENSG00000223648	IGHV3-64	3.83387	4.85385e-06	0.000279773	L-TB vs. Ctrl	Module 1
ENSG00000223650	UHRF2P1	3.33338	0.00160286	0.0244241	AL-TB vs. Ctrl	Module 2
ENSG00000223656	HMGB3P10	1.55793	3.20815e-06	0.000293283	AL-TB vs. Ctrl	Module 2
ENSG00000223877	RP11-2F9.3	-2.32283	0.00231951	0.0281374	L-TB vs. Ctrl	Module 4
ENSG00000224041	IGKV3D-15	2.70674	0.000201413	0.0148341	L-TB vs. AL-TB	Module 1
ENSG00000224041	IGKV3D-15	3.80539	1.41142e-07	1.57746e-05	L-TB vs. Ctrl	Module 1
ENSG00000224080	UBE2FP1	1.72718	2.32004e-06	0.000229093	AL-TB vs. Ctrl	Module 2
ENSG00000224137	AC079767.4	1.75077	0.000392334	0.0235083	L-TB vs. AL-TB	Module 1
ENSG00000224137	AC079767.4	2.63601	2.21219e-06	0.000151298	L-TB vs. Ctrl	Module 1
ENSG00000224215	RP11-371A19.2	-2.38738	5.90502e-06	0.00144843	L-TB vs. AL-TB	Module 3
ENSG00000224215	RP11-371A19.2	-2.73199	2.233e-05	0.000914817	L-TB vs. Ctrl	Module 3
ENSG00000224220	AC104699.1	3.88746	8.16885e-07	6.70431e-05	L-TB vs. Ctrl	Module 1
ENSG00000224220	AC104699.1	2.26735	5.25225e-05	0.00632606	L-TB vs. AL-TB	Module 1
ENSG00000224228	RP1-15D23.2	2.432	0.00480318	0.0480667	AL-TB vs. Ctrl	Module 2
ENSG00000224228	RP1-15D23.2	-2.91961	0.000572433	0.0302382	L-TB vs. AL-TB	Module 2
ENSG00000224239	AC090044.2	3.39967	9.72739e-06	0.000478435	L-TB vs. Ctrl	Module 2
ENSG00000224239	AC090044.2	4.05843	7.75228e-07	0.00010027	AL-TB vs. Ctrl	Module 2
ENSG00000224276	RP11-336K24.5	1.8801	0.00441046	0.0456203	AL-TB vs. Ctrl	Module 2
ENSG00000224286	LINC01142	4.83066	0.000498166	0.0109708	AL-TB vs. Ctrl	Module 2
ENSG00000224316	RP11-479O9.2	3.56951	0.00145442	0.0205209	L-TB vs. Ctrl	Module 1
ENSG00000224316	RP11-479O9.2	3.04021	0.00260361	0.0333625	AL-TB vs. Ctrl	Module 1
ENSG00000224373	IGHV4-59	1.98664	0.00161696	0.0245981	AL-TB vs. Ctrl	Module 1
ENSG00000224373	IGHV4-59	2.03705	0.000542454	0.0293133	L-TB vs. AL-TB	Module 1
ENSG00000224373	IGHV4-59	4.01002	3.64046e-11	1.42987e-08	L-TB vs. Ctrl	Module 1
ENSG00000224411	RP11-1033A18.1	1.5182	0.000989035	0.0177589	AL-TB vs. Ctrl	Module 2
ENSG00000224460	RP11-439L18.2	2.21934	0.000535061	0.0115344	AL-TB vs. Ctrl	Module 2
ENSG00000224474	AL355490.1	2.6177	0.00469105	0.0474096	AL-TB vs. Ctrl	Module 2
ENSG00000224478	RP11-13P5.1	2.57662	0.000897748	0.014421	L-TB vs. Ctrl	Module 1
ENSG00000224546	EIF4BP3	1.60418	9.33176e-11	3.20709e-08	L-TB vs. Ctrl	Module 1
ENSG00000224565	RP1-148H17.1	3.3598	0.00100068	0.0156009	L-TB vs. Ctrl	Module 1
ENSG00000224574	COL18A1-AS2	4.32904	0.000331412	0.00689769	L-TB vs. Ctrl	Module 1
ENSG00000224577	LINC01117	3.27067	0.000811798	0.013407	L-TB vs. Ctrl	Module 4
ENSG00000224607	IGKV1D-27	3.50759	6.28522e-05	0.00698006	L-TB vs. AL-TB	Module 1
ENSG00000224607	IGKV1D-27	3.14574	0.00110693	0.0168236	L-TB vs. Ctrl	Module 1
ENSG00000224621	RP11-276H7.3	-2.42356	0.000574148	0.0302721	L-TB vs. AL-TB	Module 2
ENSG00000224650	IGHV3-74	3.24798	3.40241e-06	0.000211165	L-TB vs. Ctrl	Module 1
ENSG00000224721	AC007182.6	-3.10891	0.00035211	0.0217337	L-TB vs. AL-TB	Module 2
ENSG00000224722	PRNCR1	1.81153	0.000586559	0.0123357	AL-TB vs. Ctrl	Module 2
ENSG00000224743	TEX26-AS1	2.0325	0.000912372	0.0405294	L-TB vs. AL-TB	Module 1
ENSG00000224743	TEX26-AS1	3.22225	2.63935e-05	0.00103666	L-TB vs. Ctrl	Module 1
ENSG00000224758	LINC01167	-3.42308	0.00091616	0.0146362	L-TB vs. Ctrl	Module 3
ENSG00000224758	LINC01167	-2.8244	0.00445901	0.045958	AL-TB vs. Ctrl	Module 3
ENSG00000224821	COL4A2-AS2	3.83922	1.30911e-05	0.000602873	L-TB vs. Ctrl	Module 2
ENSG00000224821	COL4A2-AS2	2.79651	0.000140472	0.00454066	AL-TB vs. Ctrl	Module 2
ENSG00000224959	AC017002.2	1.95915	0.00124526	0.0182988	L-TB vs. Ctrl	Module 1
ENSG00000225022	UBE2D3P1	2.37901	1.91804e-06	0.000197172	AL-TB vs. Ctrl	Module 2
ENSG00000225022	UBE2D3P1	2.18402	2.8538e-05	0.00108824	L-TB vs. Ctrl	Module 2
ENSG00000225079	FTH1P22	2.18349	5.76697e-05	0.001861	L-TB vs. Ctrl	Module 1
ENSG00000225107	AC092484.1	4.73733	0.00254566	0.0298085	L-TB vs. Ctrl	Module 1
ENSG00000225107	AC092484.1	5.98707	5.84857e-05	0.00667921	L-TB vs. AL-TB	Module 1
ENSG00000225126	RP4-549F15.1	3.49205	0.00312338	0.0341992	L-TB vs. Ctrl	Module 4
ENSG00000225205	AC093818.1	1.90742	5.97999e-06	0.000334174	L-TB vs. Ctrl	Module 1
ENSG00000225217	HSPA7	1.61995	0.000205016	0.0149048	L-TB vs. AL-TB	Module 4
ENSG00000225370	AC011515.2	3.43399	2.95355e-05	0.00111392	L-TB vs. Ctrl	Module 1
ENSG00000225391	RP11-55K22.5	3.86723	0.00502768	0.0494335	AL-TB vs. Ctrl	Module 2
ENSG00000225402	AC010878.3	-2.85635	0.00459387	0.0443327	L-TB vs. Ctrl	Module 3
ENSG00000225442	MPRIP-AS1	2.06785	0.00464348	0.0446547	L-TB vs. Ctrl	Module 2
ENSG00000225460	RP13-93L13.1	3.47896	1.42635e-05	0.000646062	L-TB vs. Ctrl	Module 1
ENSG00000225462	FDPSP1	-1.71269	0.00453921	0.0440838	L-TB vs. Ctrl	Module 3
ENSG00000225471	RP11-262D11.2	2.07713	2.61229e-05	0.00102903	L-TB vs. Ctrl	Module 2
ENSG00000225471	RP11-262D11.2	2.26367	6.27714e-07	8.64676e-05	AL-TB vs. Ctrl	Module 2
ENSG00000225489	RP11-390F4.3	3.86066	1.25341e-07	1.44796e-05	L-TB vs. Ctrl	Module 1
ENSG00000225489	RP11-390F4.3	2.39981	0.000400252	0.0236399	L-TB vs. AL-TB	Module 1
ENSG00000225521	AC005237.4	2.4838	0.00298661	0.0361594	AL-TB vs. Ctrl	Module 1
ENSG00000225521	AC005237.4	2.91433	0.00418182	0.0416576	L-TB vs. Ctrl	Module 1
ENSG00000225523	IGKV6D-21	2.74784	0.00307108	0.0338558	L-TB vs. Ctrl	Module 1
ENSG00000225630	MTND2P28	2.1748	0.000298713	0.00769116	AL-TB vs. Ctrl	Module 1
ENSG00000225630	MTND2P28	2.30659	0.000152512	0.00383287	L-TB vs. Ctrl	Module 1
ENSG00000225683	AL078585.1	-3.2487	0.00019514	0.0146008	L-TB vs. AL-TB	Module 2
ENSG00000225683	AL078585.1	-2.71285	0.00381753	0.0391055	L-TB vs. Ctrl	Module 2
ENSG00000225684	FAM225B	2.01617	0.000375577	0.0228818	L-TB vs. AL-TB	Module 4
ENSG00000225698	IGHV3-72	2.16451	0.000564394	0.029982	L-TB vs. AL-TB	Module 1
ENSG00000225742	RP11-513G11.4	-2.50353	0.00187836	0.0269806	AL-TB vs. Ctrl	Module 4
ENSG00000225783	MIAT	1.67236	2.07964e-06	0.000143303	L-TB vs. Ctrl	Module 1
ENSG00000225796	MTND4P23	3.77854	2.73707e-05	0.00141475	AL-TB vs. Ctrl	Module 2
ENSG00000225796	MTND4P23	3.37787	0.000339084	0.00702545	L-TB vs. Ctrl	Module 2
ENSG00000225929	AC000036.4	1.85129	0.00310768	0.0340963	L-TB vs. Ctrl	Module 1
ENSG00000225950	NTF4	-1.79413	0.000441059	0.00852777	L-TB vs. Ctrl	Module 3
ENSG00000226055	PAICSP1	1.9396	1.98319e-05	0.0011359	AL-TB vs. Ctrl	Module 2
ENSG00000226091	LINC00937	1.59549	0.00262316	0.0305041	L-TB vs. Ctrl	Module 1
ENSG00000226235	LEMD1-AS1	2.81583	0.00431424	0.0449706	AL-TB vs. Ctrl	Module 2
ENSG00000226330	RP11-739N20.2	2.09265	0.0020939	0.0288867	AL-TB vs. Ctrl	Module 2
ENSG00000226445	XXyac-YX65C7_A.2	2.34798	8.54541e-06	0.0018686	L-TB vs. AL-TB	Module 4
ENSG00000226453	RP11-379B8.1	1.97428	0.00415476	0.043814	AL-TB vs. Ctrl	Module 1
ENSG00000226453	RP11-379B8.1	1.71918	0.00328435	0.0353563	L-TB vs. Ctrl	Module 1
ENSG00000226571	RP11-445F6.2	2.91945	0.000719774	0.0122384	L-TB vs. Ctrl	Module 1
ENSG00000226576	RP11-523O18.1	4.16743	0.00233767	0.0282639	L-TB vs. Ctrl	Module 1
ENSG00000226632	UBE2V1P1	2.35109	0.00245303	0.0291723	L-TB vs. Ctrl	Module 1
ENSG00000226674	TEX41	1.71305	7.57259e-06	0.00039733	L-TB vs. Ctrl	Module 1
ENSG00000226751	AF127936.5	2.71017	0.000459026	0.00875206	L-TB vs. Ctrl	Module 1
ENSG00000226751	AF127936.5	2.82037	1.00327e-05	0.00199297	L-TB vs. AL-TB	Module 1
ENSG00000226757	AC079341.1	4.0391	0.00449761	0.0438206	L-TB vs. Ctrl	Module 1
ENSG00000226759	DAB1-AS1	-20.3235	4.33725e-12	6.47455e-09	L-TB vs. AL-TB	Module 2
ENSG00000226766	FABP7P1	4.65583	0.00236322	0.0284658	L-TB vs. Ctrl	Module 1
ENSG00000226777	KIAA0125	2.62637	5.82166e-08	3.90994e-05	L-TB vs. AL-TB	Module 1
ENSG00000226777	KIAA0125	3.79632	9.56255e-14	1.0112e-10	L-TB vs. Ctrl	Module 1
ENSG00000226874	AC005154.8	2.16808	7.32739e-05	0.00289211	AL-TB vs. Ctrl	Module 2
ENSG00000226900	RP11-432J24.5	-3.11235	4.81319e-05	0.00162572	L-TB vs. Ctrl	Module 3
ENSG00000226935	LINC00161	4.19621	0.00191902	0.0248407	L-TB vs. Ctrl	Module 1
ENSG00000226945	RP11-564A8.4	4.11762	0.000148188	0.00374548	L-TB vs. Ctrl	Module 1
ENSG00000226964	RHEBP2	2.61766	0.00184772	0.0241565	L-TB vs. Ctrl	Module 1
ENSG00000226971	AF196972.4	3.59631	2.97802e-05	0.00149804	AL-TB vs. Ctrl	Module 2
ENSG00000227039	ITGB2-AS1	1.785	4.60627e-08	6.36406e-06	L-TB vs. Ctrl	Module 1
ENSG00000227055	AC009961.5	3.98286	0.00106498	0.0163213	L-TB vs. Ctrl	Module 1
ENSG00000227078	AC004448.2	-2.54832	0.00175459	0.0233838	L-TB vs. Ctrl	Module 3
ENSG00000227176	AC092641.2	2.87174	0.00434845	0.0451904	AL-TB vs. Ctrl	Module 2
ENSG00000227176	AC092641.2	3.06561	0.00227974	0.0279302	L-TB vs. Ctrl	Module 2
ENSG00000227253	RP11-166N17.1	2.50781	0.00178594	0.0260469	AL-TB vs. Ctrl	Module 2
ENSG00000227295	ELL2P1	1.99074	1.61134e-06	0.00011537	L-TB vs. Ctrl	Module 1
ENSG00000227295	ELL2P1	2.03791	8.96909e-05	0.00333917	AL-TB vs. Ctrl	Module 1
ENSG00000227321	MTND4P15	3.04537	0.000503986	0.011046	AL-TB vs. Ctrl	Module 2
ENSG00000227331	AC005042.2	4.41689	1.91303e-06	0.000197172	AL-TB vs. Ctrl	Module 2
ENSG00000227331	AC005042.2	4.183	8.22952e-05	0.00241218	L-TB vs. Ctrl	Module 2
ENSG00000227443	RP11-344A7.1	19.2059	1.28478e-10	6.20976e-08	AL-TB vs. Ctrl	Module 2
ENSG00000227450	CTB-58E17.5	-1.95713	0.00262439	0.0335658	AL-TB vs. Ctrl	Module 4
ENSG00000227523	RPS20P15	4.03237	0.00416814	0.0415665	L-TB vs. Ctrl	Module 2
ENSG00000227523	RPS20P15	3.5511	0.000769457	0.0149813	AL-TB vs. Ctrl	Module 2
ENSG00000227637	RP11-242O24.5	2.45349	0.00179636	0.0237249	L-TB vs. Ctrl	Module 2
ENSG00000227637	RP11-242O24.5	2.45977	0.00110786	0.0190522	AL-TB vs. Ctrl	Module 2
ENSG00000227666	CYCSP24	3.61135	0.00102975	0.0159145	L-TB vs. Ctrl	Module 1
ENSG00000227688	HNRNPA3P2	3.42698	0.00194225	0.0250353	L-TB vs. Ctrl	Module 1
ENSG00000227759	VTI1BP4	18.9614	1.01275e-10	6.20976e-08	AL-TB vs. Ctrl	Module 1
ENSG00000227896	RP11-77P6.2	-1.99793	3.98903e-06	0.000346681	AL-TB vs. Ctrl	Module 4
ENSG00000227920	RP1-153P14.5	3.3233	1.8437e-05	0.00107387	AL-TB vs. Ctrl	Module 2
ENSG00000227920	RP1-153P14.5	2.94313	0.00137816	0.0196837	L-TB vs. Ctrl	Module 2
ENSG00000228027	RP1-251M9.3	-2.48675	2.12011e-05	0.00332245	L-TB vs. AL-TB	Module 3
ENSG00000228027	RP1-251M9.3	-2.46669	2.81051e-05	0.00107771	L-TB vs. Ctrl	Module 3
ENSG00000228079	AC012368.1	3.35927	0.000143007	0.0045919	AL-TB vs. Ctrl	Module 2
ENSG00000228079	AC012368.1	2.95916	6.74413e-05	0.00208425	L-TB vs. Ctrl	Module 2
ENSG00000228100	AC016912.3	3.54659	0.000498115	0.0109708	AL-TB vs. Ctrl	Module 2
ENSG00000228107	AP000692.9	2.00928	0.00142229	0.0226367	AL-TB vs. Ctrl	Module 2
ENSG00000228113	AC003991.3	2.76333	0.00152398	0.0236539	AL-TB vs. Ctrl	Module 2
ENSG00000228168	HNRNPA1P21	1.72224	0.0027129	0.0341904	AL-TB vs. Ctrl	Module 1
ENSG00000228168	HNRNPA1P21	2.14745	0.000151382	0.00381143	L-TB vs. Ctrl	Module 1
ENSG00000228204	RP4-724E13.2	2.17063	0.00150411	0.0235312	AL-TB vs. Ctrl	Module 2
ENSG00000228253	MT-ATP8	2.11924	0.000287187	0.0074814	AL-TB vs. Ctrl	Module 2
ENSG00000228261	RP11-127L20.3	1.60002	0.00497021	0.0490795	AL-TB vs. Ctrl	Module 2
ENSG00000228262	AC073218.2	4.36763	0.00370716	0.0383608	L-TB vs. Ctrl	Module 1
ENSG00000228302	RP11-186N15.3	1.5723	1.49988e-05	0.000671625	L-TB vs. Ctrl	Module 1
ENSG00000228302	RP11-186N15.3	1.603	0.000111887	0.00390684	AL-TB vs. Ctrl	Module 1
ENSG00000228307	OR2S1P	-1.6817	0.00474637	0.0453271	L-TB vs. Ctrl	Module 2
ENSG00000228307	OR2S1P	-1.74277	0.000176055	0.0136809	L-TB vs. AL-TB	Module 2
ENSG00000228318	AP001610.5	2.88873	0.00335494	0.035798	L-TB vs. Ctrl	Module 2
ENSG00000228318	AP001610.5	2.88763	0.00186	0.0267728	AL-TB vs. Ctrl	Module 2
ENSG00000228327	RP11-206L10.2	1.7432	0.00401308	0.0429027	AL-TB vs. Ctrl	Module 2
ENSG00000228352	RP11-537H15.3	2.04561	0.00284542	0.0351566	AL-TB vs. Ctrl	Module 2
ENSG00000228353	RP11-184A2.2	4.33496	0.00047306	0.0105614	AL-TB vs. Ctrl	Module 2
ENSG00000228363	AC015971.2	1.89503	0.00147194	0.0232523	AL-TB vs. Ctrl	Module 2
ENSG00000228363	AC015971.2	2.04369	0.00271014	0.0311768	L-TB vs. Ctrl	Module 2
ENSG00000228403	RP11-563N6.6	2.71634	5.15287e-05	0.00169668	L-TB vs. Ctrl	Module 1
ENSG00000228470	RP11-176D17.3	2.50434	0.00394084	0.0424108	AL-TB vs. Ctrl	Module 2
ENSG00000228513	AC023271.1	4.15297	8.25781e-05	0.00315538	AL-TB vs. Ctrl	Module 2
ENSG00000228549	U1	-1.57277	0.00174794	0.0257457	AL-TB vs. Ctrl	Module 3
ENSG00000228554	AC004837.5	2.08972	0.00391317	0.0422258	AL-TB vs. Ctrl	Module 1
ENSG00000228554	AC004837.5	2.20281	0.00201561	0.0256679	L-TB vs. Ctrl	Module 1
ENSG00000228559	RP3-340B19.3	-1.68599	0.00404137	0.0407009	L-TB vs. Ctrl	Module 3
ENSG00000228643	AC079779.4	2.00666	0.00122209	0.0203681	AL-TB vs. Ctrl	Module 2
ENSG00000228653	HNRNPCP7	1.62868	0.00197663	0.0253714	L-TB vs. Ctrl	Module 1
ENSG00000228670	NANOGP2	3.65335	0.00189785	0.0271755	AL-TB vs. Ctrl	Module 2
ENSG00000228723	SRGAP3-AS2	-2.89471	0.000584305	0.0104333	L-TB vs. Ctrl	Module 3
ENSG00000228804	RP11-211G3.3	2.79295	0.00188231	0.0245038	L-TB vs. Ctrl	Module 2
ENSG00000228804	RP11-211G3.3	2.771	0.000516821	0.0112646	AL-TB vs. Ctrl	Module 2
ENSG00000228923	AP000355.2	-3.21656	9.09913e-06	0.00193152	L-TB vs. AL-TB	Module 2
ENSG00000228955	RP11-452J6.2	3.79353	0.00472507	0.0451582	L-TB vs. Ctrl	Module 1
ENSG00000228956	AC144521.1	1.90117	0.000173897	0.0136809	L-TB vs. AL-TB	Module 1
ENSG00000228956	AC144521.1	3.61717	3.83709e-09	7.7005e-07	L-TB vs. Ctrl	Module 1
ENSG00000229017	RP11-439L18.3	2.42288	1.4241e-06	0.000159488	AL-TB vs. Ctrl	Module 2
ENSG00000229056	AC020571.3	1.90034	0.00270917	0.0311768	L-TB vs. Ctrl	Module 2
ENSG00000229056	AC020571.3	1.95409	0.00141982	0.0226105	AL-TB vs. Ctrl	Module 2
ENSG00000229097	CALM2P2	1.53475	0.00292918	0.0328714	L-TB vs. Ctrl	Module 2
ENSG00000229097	CALM2P2	1.93079	6.3753e-05	0.00262149	AL-TB vs. Ctrl	Module 2
ENSG00000229107	ABHD17AP4	3.32002	0.000738389	0.0355116	L-TB vs. AL-TB	Module 1
ENSG00000229107	ABHD17AP4	3.49775	0.00459386	0.0443327	L-TB vs. Ctrl	Module 1
ENSG00000229155	RP11-528A4.2	-2.5699	0.000265754	0.00585615	L-TB vs. Ctrl	Module 3
ENSG00000229164	TRAC	1.50579	2.03539e-06	0.00014096	L-TB vs. Ctrl	Module 1
ENSG00000229228	LINC00582	4.01898	1.2371e-06	9.26779e-05	L-TB vs. Ctrl	Module 1
ENSG00000229228	LINC00582	2.64179	5.1142e-05	0.00628315	L-TB vs. AL-TB	Module 1
ENSG00000229237	HMGN1P37	3.48728	0.000230197	0.00646183	AL-TB vs. Ctrl	Module 2
ENSG00000229240	LINC00710	2.73681	0.00433129	0.0426673	L-TB vs. Ctrl	Module 2
ENSG00000229303	PPIAP25	-20.2612	5.04964e-12	6.47455e-09	L-TB vs. AL-TB	Module 2
ENSG00000229447	RP11-490K7.4	1.87016	0.00490703	0.0463781	L-TB vs. Ctrl	Module 2
ENSG00000229447	RP11-490K7.4	1.91089	0.000631341	0.0129705	AL-TB vs. Ctrl	Module 2
ENSG00000229487	ALG13-AS1	2.2502	0.00450872	0.0438962	L-TB vs. Ctrl	Module 1
ENSG00000229498	AC105053.3	2.58699	7.69852e-05	0.00299568	AL-TB vs. Ctrl	Module 2
ENSG00000229559	RP1-153P14.3	3.26682	0.00179847	0.0237317	L-TB vs. Ctrl	Module 1
ENSG00000229588	RP11-479J7.2	3.50807	0.00286074	0.032421	L-TB vs. Ctrl	Module 4
ENSG00000229604	MTATP8P2	3.79264	0.00385172	0.0418594	AL-TB vs. Ctrl	Module 2
ENSG00000229625	RP11-44N12.2	4.53058	0.00015631	0.0038998	L-TB vs. Ctrl	Module 1
ENSG00000229644	NAMPTL	1.88053	0.00110022	0.0189918	AL-TB vs. Ctrl	Module 2
ENSG00000229659	RP11-345K20.2	2.71965	4.34144e-06	0.000254507	L-TB vs. Ctrl	Module 1
ENSG00000229659	RP11-345K20.2	2.00446	0.0009687	0.0175461	AL-TB vs. Ctrl	Module 1
ENSG00000229672	RP11-184A2.3	3.45709	0.00205437	0.0285717	AL-TB vs. Ctrl	Module 2
ENSG00000229676	ZNF492	2.12204	0.000201308	0.0148341	L-TB vs. AL-TB	Module 4
ENSG00000229676	ZNF492	-1.7307	0.00468287	0.0473617	AL-TB vs. Ctrl	Module 4
ENSG00000229677	RP11-383F6.1	2.53635	0.000876323	0.0164161	AL-TB vs. Ctrl	Module 2
ENSG00000229689	AC009237.8	-1.9677	1.95883e-05	0.00113043	AL-TB vs. Ctrl	Module 3
ENSG00000229689	AC009237.8	-2.1798	4.99159e-05	0.00166552	L-TB vs. Ctrl	Module 3
ENSG00000229715	EEF1DP3	1.91532	0.000374058	0.00905118	AL-TB vs. Ctrl	Module 2
ENSG00000229754	CXCR2P1	2.98176	1.22718e-06	9.21862e-05	L-TB vs. Ctrl	Module 2
ENSG00000229754	CXCR2P1	1.88229	0.000109856	0.00385055	AL-TB vs. Ctrl	Module 2
ENSG00000229757	RP4-738P11.4	3.1903	0.00346767	0.0364729	L-TB vs. Ctrl	Module 1
ENSG00000229808	RP11-456P18.2	1.51462	0.00151632	0.0236087	AL-TB vs. Ctrl	Module 2
ENSG00000229897	SEPT7P7	3.44191	0.00277073	0.0346655	AL-TB vs. Ctrl	Module 2
ENSG00000229900	HSPD1P21	-4.21579	0.000678122	0.0336177	L-TB vs. AL-TB	Module 2
ENSG00000229953	RP11-284F21.7	3.51405	0.000136928	0.00351842	L-TB vs. Ctrl	Module 1
ENSG00000229989	MIR181A1HG	3.01358	4.03499e-07	6.04152e-05	AL-TB vs. Ctrl	Module 1
ENSG00000229989	MIR181A1HG	3.49134	1.18589e-06	9.00688e-05	L-TB vs. Ctrl	Module 1
ENSG00000230002	ALMS1-IT1	1.99499	5.79092e-06	0.000461097	AL-TB vs. Ctrl	Module 2
ENSG00000230006	ANKRD36BP2	3.39189	2.53449e-16	7.74257e-13	L-TB vs. Ctrl	Module 1
ENSG00000230006	ANKRD36BP2	1.57902	0.00115197	0.0466878	L-TB vs. AL-TB	Module 1
ENSG00000230006	ANKRD36BP2	1.8324	0.000598909	0.0124967	AL-TB vs. Ctrl	Module 1
ENSG00000230071	RPL4P6	1.74751	0.00052298	0.00961794	L-TB vs. Ctrl	Module 1
ENSG00000230107	CTA-126B4.7	2.40986	8.75545e-05	0.00851633	L-TB vs. AL-TB	Module 4
ENSG00000230154	AC018463.4	2.01985	0.000470284	0.010525	AL-TB vs. Ctrl	Module 1
ENSG00000230154	AC018463.4	2.85754	5.84276e-06	0.000328355	L-TB vs. Ctrl	Module 1
ENSG00000230224	PHBP9	2.85502	8.17055e-07	0.000104697	AL-TB vs. Ctrl	Module 2
ENSG00000230224	PHBP9	3.00831	1.9805e-06	0.000138203	L-TB vs. Ctrl	Module 2
ENSG00000230225	MTND5P14	4.37919	5.0754e-05	0.00221596	AL-TB vs. Ctrl	Module 2
ENSG00000230225	MTND5P14	4.98269	7.38077e-05	0.00223242	L-TB vs. Ctrl	Module 2
ENSG00000230257	NFE4	2.76161	0.000709123	0.0140853	AL-TB vs. Ctrl	Module 2
ENSG00000230325	RP11-385F5.4	2.21891	0.00458674	0.0443261	L-TB vs. Ctrl	Module 1
ENSG00000230372	RP3-425P12.2	6.60269	4.7181e-09	1.47709e-06	AL-TB vs. Ctrl	Module 2
ENSG00000230373	GOLGA6L5P	1.78234	2.45297e-05	0.000977418	L-TB vs. Ctrl	Module 2
ENSG00000230373	GOLGA6L5P	1.69699	6.43097e-06	0.000503333	AL-TB vs. Ctrl	Module 2
ENSG00000230455	BMS1P14	-3.0139	0.00381504	0.041675	AL-TB vs. Ctrl	Module 4
ENSG00000230482	ATP5G2P3	2.65124	0.0045717	0.0442432	L-TB vs. Ctrl	Module 1
ENSG00000230495	RP11-462D18.2	3.28184	0.00260531	0.0303524	L-TB vs. Ctrl	Module 2
ENSG00000230495	RP11-462D18.2	4.58965	1.85929e-08	4.49329e-06	AL-TB vs. Ctrl	Module 2
ENSG00000230552	AC092162.1	2.80859	0.00205347	0.0285717	AL-TB vs. Ctrl	Module 2
ENSG00000230581	RP11-390F4.8	2.68986	0.0047254	0.0451582	L-TB vs. Ctrl	Module 1
ENSG00000230709	AC104024.1	3.52697	0.00299801	0.0362213	AL-TB vs. Ctrl	Module 1
ENSG00000230709	AC104024.1	4.64304	5.6912e-08	7.63287e-06	L-TB vs. Ctrl	Module 1
ENSG00000230721	RP4-612B15.2	3.57106	0.00360404	0.0403787	AL-TB vs. Ctrl	Module 2
ENSG00000230730	AC074011.2	1.88483	0.00264407	0.0336618	AL-TB vs. Ctrl	Module 2
ENSG00000230823	CBX1P1	3.49567	0.000910474	0.0168686	AL-TB vs. Ctrl	Module 2
ENSG00000230832	RP11-325P15.2	2.24819	0.00239953	0.0317061	AL-TB vs. Ctrl	Module 2
ENSG00000230836	AC104135.4	2.90834	0.00113853	0.0171842	L-TB vs. Ctrl	Module 1
ENSG00000230838	AC093850.2	2.90502	0.00089415	0.0143849	L-TB vs. Ctrl	Module 4
ENSG00000230838	AC093850.2	3.37782	7.91722e-06	0.0017585	L-TB vs. AL-TB	Module 4
ENSG00000230943	RP11-367G18.1	2.49806	0.000504227	0.00937971	L-TB vs. Ctrl	Module 1
ENSG00000230946	HNRNPA1P68	4.62799	1.20695e-05	0.000561487	L-TB vs. Ctrl	Module 2
ENSG00000230946	HNRNPA1P68	6.3584	1.70151e-09	5.98533e-07	AL-TB vs. Ctrl	Module 2
ENSG00000230969	AC104024.2	3.89633	0.00136471	0.0195424	L-TB vs. Ctrl	Module 1
ENSG00000231152	MTND2P15	19.2059	1.28478e-10	6.20976e-08	AL-TB vs. Ctrl	Module 2
ENSG00000231181	RP13-15M17.1	2.25608	0.000374961	0.00905362	AL-TB vs. Ctrl	Module 2
ENSG00000231194	FARP1-AS1	2.36077	0.00316642	0.0373757	AL-TB vs. Ctrl	Module 2
ENSG00000231329	RP1-225E12.2	2.30626	0.00165434	0.0249159	AL-TB vs. Ctrl	Module 1
ENSG00000231329	RP1-225E12.2	3.43427	2.45972e-07	2.49548e-05	L-TB vs. Ctrl	Module 1
ENSG00000231344	RP3-426I6.2	-1.99219	0.00294138	0.0329545	L-TB vs. Ctrl	Module 3
ENSG00000231419	LINC00689	-1.83496	0.00036289	0.022253	L-TB vs. AL-TB	Module 2
ENSG00000231419	LINC00689	-1.6118	0.00299929	0.0333991	L-TB vs. Ctrl	Module 2
ENSG00000231437	RP11-88H9.2	1.837	9.5989e-05	0.00905572	L-TB vs. AL-TB	Module 4
ENSG00000231475	IGHV4-31	3.93907	9.47409e-05	0.00266068	L-TB vs. Ctrl	Module 1
ENSG00000231486	AC096579.7	3.65464	2.77367e-11	1.1382e-08	L-TB vs. Ctrl	Module 1
ENSG00000231486	AC096579.7	2.31662	5.50924e-06	0.00142573	L-TB vs. AL-TB	Module 1
ENSG00000231503	PTMAP4	1.72684	3.07275e-05	0.00115413	L-TB vs. Ctrl	Module 1
ENSG00000231503	PTMAP4	1.63235	0.000126978	0.00428182	AL-TB vs. Ctrl	Module 1
ENSG00000231587	SNORD62B	2.56225	2.73815e-05	0.0010663	L-TB vs. Ctrl	Module 2
ENSG00000231587	SNORD62B	2.55722	1.02011e-05	0.000699104	AL-TB vs. Ctrl	Module 2
ENSG00000231615	RP11-296O14.2	3.23042	0.000341268	0.00848551	AL-TB vs. Ctrl	Module 2
ENSG00000231652	RP11-553A21.3	2.68047	0.00168396	0.0251561	AL-TB vs. Ctrl	Module 2
ENSG00000231702	RP11-54O7.10	4.03574	0.000261743	0.0070078	AL-TB vs. Ctrl	Module 2
ENSG00000231702	RP11-54O7.10	3.14463	0.00522667	0.0484988	L-TB vs. Ctrl	Module 2
ENSG00000231703	RP4-669H2.1	4.04418	0.000113874	0.00304557	L-TB vs. Ctrl	Module 1
ENSG00000231747	AC079922.2	2.69843	0.000416344	0.00815914	L-TB vs. Ctrl	Module 2
ENSG00000231747	AC079922.2	3.36794	1.93479e-05	0.00112454	AL-TB vs. Ctrl	Module 2
ENSG00000231764	DLX6-AS1	4.74838	4.51139e-05	0.00154852	L-TB vs. Ctrl	Module 1
ENSG00000231794	AC009542.2	4.12673	1.46378e-05	0.000900158	AL-TB vs. Ctrl	Module 1
ENSG00000231794	AC009542.2	4.56821	4.02895e-06	0.000240286	L-TB vs. Ctrl	Module 1
ENSG00000231858	AC067945.4	3.49575	2.22856e-06	0.000151664	L-TB vs. Ctrl	Module 2
ENSG00000231858	AC067945.4	3.76467	3.95227e-08	8.48792e-06	AL-TB vs. Ctrl	Module 2
ENSG00000231865	SIK3-IT1	2.80931	0.000767082	0.0128286	L-TB vs. Ctrl	Module 2
ENSG00000231865	SIK3-IT1	3.71416	0.00060644	0.0125999	AL-TB vs. Ctrl	Module 2
ENSG00000231920	NEBL-AS1	-2.38561	2.71231e-05	0.00105959	L-TB vs. Ctrl	Module 3
ENSG00000231920	NEBL-AS1	-1.58625	0.000371204	0.00901395	AL-TB vs. Ctrl	Module 3
ENSG00000232019	AC074183.4	-2.78566	8.40033e-06	0.000607426	AL-TB vs. Ctrl	Module 4
ENSG00000232019	AC074183.4	-2.60889	2.76119e-06	0.000179471	L-TB vs. Ctrl	Module 4
ENSG00000232027	RP11-275F13.3	2.35704	0.00483666	0.0459341	L-TB vs. Ctrl	Module 1
ENSG00000232043	RP4-530I15.9	2.14208	0.000733997	0.0124188	L-TB vs. Ctrl	Module 1
ENSG00000232075	MRPL35P2	2.93354	1.28247e-05	0.00082745	AL-TB vs. Ctrl	Module 2
ENSG00000232075	MRPL35P2	2.6851	7.80859e-05	0.00231346	L-TB vs. Ctrl	Module 2
ENSG00000232114	AC018693.5	19.2059	1.28478e-10	6.20976e-08	AL-TB vs. Ctrl	Module 2
ENSG00000232216	IGHV3-43	2.93853	5.4577e-05	0.00642678	L-TB vs. AL-TB	Module 1
ENSG00000232216	IGHV3-43	2.09719	0.00114772	0.0194942	AL-TB vs. Ctrl	Module 1
ENSG00000232216	IGHV3-43	3.79839	6.54838e-05	0.00203897	L-TB vs. Ctrl	Module 1
ENSG00000232328	AC011286.1	-3.16621	0.00434321	0.0427506	L-TB vs. Ctrl	Module 3
ENSG00000232352	SEMA3B-AS1	-1.63146	0.000191702	0.00458717	L-TB vs. Ctrl	Module 3
ENSG00000232400	RAD17P1	2.71943	0.00179317	0.0261227	AL-TB vs. Ctrl	Module 2
ENSG00000232499	RP11-512F24.1	1.71676	2.06398e-05	0.000859802	L-TB vs. Ctrl	Module 2
ENSG00000232499	RP11-512F24.1	1.80298	1.21277e-05	0.000799323	AL-TB vs. Ctrl	Module 2
ENSG00000232591	RP5-1031D4.2	3.87877	0.00223294	0.027555	L-TB vs. Ctrl	Module 1
ENSG00000232613	AC007386.4	2.97849	5.73597e-06	0.00144656	L-TB vs. AL-TB	Module 1
ENSG00000232613	AC007386.4	5.06087	1.30282e-12	9.18453e-10	L-TB vs. Ctrl	Module 1
ENSG00000232618	RP11-439L18.1	2.54493	0.000140196	0.00454066	AL-TB vs. Ctrl	Module 2
ENSG00000232665	PHBP10	-2.56876	0.000152394	0.00383287	L-TB vs. Ctrl	Module 3
ENSG00000232680	AC002511.3	3.61184	0.000922406	0.0169755	AL-TB vs. Ctrl	Module 2
ENSG00000232788	AC078883.3	1.52926	0.00257159	0.0300227	L-TB vs. Ctrl	Module 1
ENSG00000232811	RP11-96K19.2	2.03214	0.000520613	0.00959365	L-TB vs. Ctrl	Module 1
ENSG00000232814	COL4A2-AS1	1.76518	0.00234573	0.0312802	AL-TB vs. Ctrl	Module 1
ENSG00000232814	COL4A2-AS1	1.86248	0.0016453	0.022263	L-TB vs. Ctrl	Module 1
ENSG00000232821	AC003986.6	4.67003	0.0034637	0.0364591	L-TB vs. Ctrl	Module 1
ENSG00000232869	TRBV29-1	2.26635	2.50572e-05	0.000991255	L-TB vs. Ctrl	Module 1
ENSG00000232874	RP11-135A1.2	-2.141	0.000385774	0.00922575	AL-TB vs. Ctrl	Module 4
ENSG00000232882	PHKA1P1	2.01312	0.00169005	0.0251848	AL-TB vs. Ctrl	Module 2
ENSG00000232884	AF127936.3	3.34512	2.3507e-07	0.000112387	L-TB vs. AL-TB	Module 1
ENSG00000232884	AF127936.3	4.81159	1.19265e-09	2.79089e-07	L-TB vs. Ctrl	Module 1
ENSG00000232901	CYCSP10	1.9243	0.00368727	0.0408348	AL-TB vs. Ctrl	Module 2
ENSG00000232903	LINC01166	-2.7331	0.00174059	0.023231	L-TB vs. Ctrl	Module 3
ENSG00000232913	RP11-429H9.4	3.79259	0.000309182	0.007887	AL-TB vs. Ctrl	Module 2
ENSG00000232920	RP11-465M18.1	19.2059	1.28478e-10	6.20976e-08	AL-TB vs. Ctrl	Module 2
ENSG00000233013	FAM157B	2.24609	0.00194293	0.0276059	AL-TB vs. Ctrl	Module 2
ENSG00000233087	AC073869.1	2.11485	0.00018644	0.00552303	AL-TB vs. Ctrl	Module 2
ENSG00000233087	AC073869.1	1.67069	0.00456642	0.044223	L-TB vs. Ctrl	Module 2
ENSG00000233090	AC015922.7	-2.93472	0.00132739	0.0191094	L-TB vs. Ctrl	Module 3
ENSG00000233110	RP11-301L8.2	1.80265	1.0829e-05	0.000734826	AL-TB vs. Ctrl	Module 2
ENSG00000233264	AC006042.8	2.30068	0.000131009	0.00435613	AL-TB vs. Ctrl	Module 1
ENSG00000233264	AC006042.8	2.92923	3.43716e-06	0.000212362	L-TB vs. Ctrl	Module 1
ENSG00000233328	PFN1P1	2.30617	0.000160522	0.00397594	L-TB vs. Ctrl	Module 1
ENSG00000233328	PFN1P1	1.83636	0.00201247	0.0282731	AL-TB vs. Ctrl	Module 1
ENSG00000233384	RP11-100E13.1	2.46132	0.000491548	0.0273483	L-TB vs. AL-TB	Module 1
ENSG00000233384	RP11-100E13.1	3.14951	0.000227694	0.00523172	L-TB vs. Ctrl	Module 1
ENSG00000233393	AP000688.29	-2.08824	0.00320195	0.034755	L-TB vs. Ctrl	Module 3
ENSG00000233493	TMEM238	-2.23071	0.000733018	0.0124098	L-TB vs. Ctrl	Module 3
ENSG00000233493	TMEM238	-1.84123	0.00118163	0.0198985	AL-TB vs. Ctrl	Module 3
ENSG00000233521	RP5-1172A22.1	3.05199	7.82807e-07	6.50226e-05	L-TB vs. Ctrl	Module 1
ENSG00000233680	HNRNPA1P27	-1.81581	0.00030779	0.0199132	L-TB vs. AL-TB	Module 2
ENSG00000233680	HNRNPA1P27	-1.56156	0.00491643	0.046435	L-TB vs. Ctrl	Module 2
ENSG00000233682	RP11-13P5.2	3.51363	5.77352e-06	0.00144656	L-TB vs. AL-TB	Module 4
ENSG00000233690	EBAG9P1	2.43656	0.00193861	0.0275792	AL-TB vs. Ctrl	Module 2
ENSG00000233760	AC004947.2	-1.84414	0.00181885	0.0238813	L-TB vs. Ctrl	Module 3
ENSG00000233806	AC131097.3	1.90934	0.00297951	0.036145	AL-TB vs. Ctrl	Module 1
ENSG00000233806	AC131097.3	1.76717	0.00496171	0.0466968	L-TB vs. Ctrl	Module 1
ENSG00000233817	RP11-168K11.3	3.0988	0.00224147	0.0303303	AL-TB vs. Ctrl	Module 2
ENSG00000233930	KRTAP5-AS1	-1.50569	0.00449937	0.0438206	L-TB vs. Ctrl	Module 3
ENSG00000233966	UBE2SP1	-1.70613	0.000482542	0.0107123	AL-TB vs. Ctrl	Module 4
ENSG00000233999	IGKV3OR2-268	3.80307	0.00132623	0.0191094	L-TB vs. Ctrl	Module 1
ENSG00000234059	CASKP1	4.51047	0.000398991	0.00946788	AL-TB vs. Ctrl	Module 2
ENSG00000234075	RPL35AP	19.2516	5.31607e-11	5.42436e-08	AL-TB vs. Ctrl	Module 2
ENSG00000234075	RPL35AP	-19.7856	1.42395e-11	1.74638e-08	L-TB vs. AL-TB	Module 2
ENSG00000234184	RP5-887A10.1	2.71306	0.000155852	0.0126451	L-TB vs. AL-TB	Module 1
ENSG00000234184	RP5-887A10.1	4.21196	4.58212e-08	6.36267e-06	L-TB vs. Ctrl	Module 1
ENSG00000234252	AC007308.6	1.97943	0.00411715	0.0435757	AL-TB vs. Ctrl	Module 2
ENSG00000234290	AC116366.6	1.93367	5.74777e-12	7.91756e-09	AL-TB vs. Ctrl	Module 2
ENSG00000234292	RP11-213H15.1	2.62836	3.50472e-05	0.00168508	AL-TB vs. Ctrl	Module 2
ENSG00000234299	CDK2AP2P1	3.1542	0.00501205	0.0470633	L-TB vs. Ctrl	Module 1
ENSG00000234337	RP11-297L17.6	1.72004	0.00206912	0.0286886	AL-TB vs. Ctrl	Module 2
ENSG00000234345	LL0XNC01-116E7.1	2.84318	0.00256586	0.0299685	L-TB vs. Ctrl	Module 1
ENSG00000234389	AC007278.3	4.53938	1.7163e-09	5.98533e-07	AL-TB vs. Ctrl	Module 2
ENSG00000234389	AC007278.3	4.34337	4.52809e-08	6.31956e-06	L-TB vs. Ctrl	Module 2
ENSG00000234436	AC008984.7	3.35603	0.000212935	0.00609175	AL-TB vs. Ctrl	Module 2
ENSG00000234449	RP11-706O15.3	2.2448	0.00177682	0.0235431	L-TB vs. Ctrl	Module 1
ENSG00000234484	RP1-55C23.7	3.0941	0.00136549	0.0220125	AL-TB vs. Ctrl	Module 2
ENSG00000234511	C5orf58	2.31744	1.50915e-08	2.44074e-06	L-TB vs. Ctrl	Module 1
ENSG00000234511	C5orf58	1.56135	0.000596016	0.0124869	AL-TB vs. Ctrl	Module 1
[truncated: 893 more rows]

## Sheet: Sheet3
DEGs between human ECs with FOXO3 knockdown and Control ECs
gene_id	Symbol	log2FoldChange	pvalue	padj
ENSG00000000938	FGR	3.08262	1.14673e-11	6.5417e-11
ENSG00000002549	LAP3	2.41282	0	0
ENSG00000003096	KLHL13	-2.50313	5.22097e-43	7.2248e-42
ENSG00000003989	SLC7A2	2.2059	0	0
ENSG00000004468	CD38	7.21077	1.60578e-100	4.35496e-99
ENSG00000005187	ACSM3	-2.71936	1.02077e-11	5.84627e-11
ENSG00000006210	CX3CL1	4.19111	0	0
ENSG00000006534	ALDH3B1	1.51627	2.45727e-08	1.14915e-07
ENSG00000007908	SELE	2.52687	1.2441e-105	3.52441e-104
ENSG00000007968	E2F2	-2.2442	6.84363e-10	3.51533e-09
ENSG00000010030	ETV7	6.93475	6.51398e-133	2.23492e-131
ENSG00000010319	SEMA3G	-5.21874	0	0
ENSG00000010818	HIVEP2	1.63356	2.318e-61	4.19629e-60
ENSG00000011028	MRC2	-1.6346	2.39346e-247	1.37959e-245
ENSG00000011201	KAL1	-1.53044	0.00177997	0.00506971
ENSG00000013016	EHD3	-3.68966	2.72207e-221	1.41436e-219
ENSG00000013374	NUB1	1.56221	1.47722e-210	7.2404e-209
ENSG00000013619	MAMLD1	-2.70607	1.16233e-39	1.51714e-38
ENSG00000014914	MTMR11	1.8117	1.69243e-63	3.16178e-62
ENSG00000017483	SLC38A5	2.01082	3.65205e-93	9.39751e-92
ENSG00000019102	VSIG2	-1.68196	9.08812e-16	6.27402e-15
ENSG00000019549	SNAI2	-2.01784	0.00448899	0.0119069
ENSG00000019582	CD74	4.29017	6.67469e-83	1.54138e-81
ENSG00000019991	HGF	3.27633	7.739e-33	8.75804e-32
ENSG00000020181	GPR124	-2.54096	3.73208e-272	2.40086e-270
ENSG00000022267	FHL1	-1.64731	1.20452e-127	3.96282e-126
ENSG00000023445	BIRC3	4.90351	1.03486e-179	4.45588e-178
ENSG00000025708	TYMP	5.08594	0	0
ENSG00000026025	VIM	-1.85763	0	0
ENSG00000026950	BTN3A1	2.79925	0	0
ENSG00000028277	POU2F2	3.86142	0	0
ENSG00000029993	HMGB3	-1.82738	2.26039e-94	5.89364e-93
ENSG00000034063	UHRF1	-1.52341	2.90817e-42	3.96844e-41
ENSG00000037280	FLT4	-1.88843	4.78589e-145	1.74447e-143
ENSG00000038210	PI4K2B	1.98494	2.14104e-226	1.13987e-224
ENSG00000040608	RTN4R	-6.72181	1.07581e-06	4.39244e-06
ENSG00000041982	TNC	4.87555	0.00821897	0.0207927
ENSG00000042062	FAM65C	3.1012	4.07243e-29	4.22387e-28
ENSG00000042980	ADAM28	2.98511	0.00325865	0.00887212
ENSG00000043143	JADE2	1.93466	5.24249e-272	3.36251e-270
ENSG00000043462	LCP2	2.2454	0.00217467	0.00609984
ENSG00000046889	PREX2	-1.57357	1.10989e-168	4.51793e-167
ENSG00000047617	ANO2	-1.53046	6.47783e-19	5.04753e-18
ENSG00000049130	KITLG	-1.58927	5.6016e-114	1.68868e-112
ENSG00000049249	TNFRSF9	5.66629	0.000609194	0.00186116
ENSG00000049540	ELN	-1.95483	0.00486535	0.0128218
ENSG00000050730	TNIP3	6.99426	3.37041e-170	1.39029e-168
ENSG00000054690	PLEKHH1	1.52139	2.99369e-05	0.000106551
ENSG00000055163	CYFIP2	-1.50306	8.40954e-19	6.53152e-18
ENSG00000055332	EIF2AK2	2.26749	0	0
ENSG00000055813	CCDC85A	-1.50029	8.5884e-31	9.22655e-30
ENSG00000056291	NPFFR2	-1.66247	0.0143772	0.0345677
ENSG00000056558	TRAF1	2.53144	2.16616e-116	6.61321e-115
ENSG00000057657	PRDM1	-2.42906	3.89776e-18	2.95407e-17
ENSG00000057704	TMCC3	-1.66242	9.56242e-116	2.91115e-114
ENSG00000058085	LAMC2	3.05587	6.78015e-59	1.18955e-57
ENSG00000058866	DGKG	3.79351	2.40326e-20	1.96246e-19
ENSG00000059378	PARP12	1.86679	0	0
ENSG00000060491	OGFR	2.06567	0	0
ENSG00000060558	GNA15	2.16836	3.00754e-10	1.58055e-09
ENSG00000060982	BCAT1	-1.81447	0	0
ENSG00000061455	PRDM6	-2.08913	0.00215126	0.00603889
ENSG00000062282	DGAT2	1.80633	1.86792e-05	6.78229e-05
ENSG00000062582	MRPS24	4.98272	1.24033e-10	6.69407e-10
ENSG00000063046	EIF4B	-1.5333	0	0
ENSG00000064012	CASP8	1.83417	1.95502e-113	5.86914e-112
ENSG00000064042	LIMCH1	-2.60418	0	0
ENSG00000064692	SNCAIP	-2.92757	1.27078e-64	2.40946e-63
ENSG00000065328	MCM10	-1.66175	3.07916e-12	1.81698e-11
ENSG00000065609	SNAP91	-6.23642	1.58678e-05	5.80537e-05
ENSG00000065618	COL17A1	1.83555	1.58204e-12	9.47514e-12
ENSG00000065717	TLE2	-1.53502	3.39641e-113	1.0154e-111
ENSG00000066185	ZMYND12	2.87341	0.00333971	0.00907565
ENSG00000066735	KIF26A	-3.57305	5.3892e-38	6.79228e-37
ENSG00000067066	SP100	1.67619	0	0
ENSG00000067715	SYT1	-2.47603	5.28045e-22	4.55636e-21
ENSG00000067798	NAV3	2.63864	0	0
ENSG00000067842	ATP2B3	-4.9879	0.00615477	0.0159133
ENSG00000068078	FGFR3	-2.04186	0.00899058	0.0225862
ENSG00000068079	IFI35	4.80689	0	0
ENSG00000069188	SDK2	6.48844	6.83813e-06	2.59173e-05
ENSG00000069482	GAL	3.12734	3.32921e-06	1.2987e-05
ENSG00000069812	HES2	-2.39198	4.01955e-83	9.32216e-82
ENSG00000070182	SPTB	-3.11503	0.00464737	0.0122968
ENSG00000070729	CNGB1	4.48842	0.00557991	0.014533
ENSG00000071246	VASH1	-3.87975	0	0
ENSG00000071282	LMCD1	-2.10479	1.80117e-09	9.00375e-09
ENSG00000072041	SLC6A15	-1.93436	0.00138449	0.00400827
ENSG00000072121	ZFYVE26	1.92787	0	0
ENSG00000072163	LIMS2	-1.62288	9.41237e-138	3.3081e-136
ENSG00000072195	SPEG	-2.3292	1.75363e-05	6.38987e-05
ENSG00000072858	SIDT1	3.31565	7.54248e-05	0.000257797
ENSG00000073734	ABCB11	2.01671	1.44146e-05	5.30154e-05
ENSG00000073737	DHRS9	4.039	1.29511e-32	1.4565e-31
ENSG00000073754	CD5L	5.08577	0.00354609	0.00958589
ENSG00000073756	PTGS2	2.94594	0	0
ENSG00000073910	FRY	-1.65198	9.56612e-158	3.71224e-156
ENSG00000074370	ATP2A3	-2.43923	8.42675e-06	3.16497e-05
ENSG00000074527	NTN4	-2.95338	1.26528e-257	7.53419e-256
ENSG00000074964	ARHGEF10L	2.28188	1.14274e-12	6.89376e-12
ENSG00000075213	SEMA3A	2.19882	3.45743e-32	3.85616e-31
ENSG00000075223	SEMA3C	3.44589	2.57063e-177	1.10028e-175
ENSG00000075275	CELSR1	-3.34636	1.19703e-09	6.05095e-09
ENSG00000075618	FSCN1	-2.24963	0	0
ENSG00000075884	ARHGAP15	4.74007	0.0192648	0.0450221
ENSG00000076554	TPD52	-1.90925	6.11854e-20	4.93111e-19
ENSG00000077150	NFKB2	1.92322	7.71312e-270	4.87482e-268
ENSG00000077327	SPAG6	5.04793	0.00414959	0.0110787
ENSG00000077522	ACTN2	2.18761	1.11785e-32	1.25911e-31
ENSG00000078081	LAMP3	6.59337	5.09999e-177	2.17428e-175
ENSG00000078399	HOXA9	-1.56731	3.90143e-09	1.91484e-08
ENSG00000079102	RUNX1T1	-2.59028	1.4207e-78	3.14636e-77
ENSG00000079215	SLC1A3	5.74987	5.27935e-07	2.21665e-06
ENSG00000079257	LXN	-2.4775	7.1067e-294	4.90771e-292
ENSG00000079263	SP140	3.04407	8.23371e-07	3.3964e-06
ENSG00000079385	CEACAM1	3.48124	0	0
ENSG00000080031	PTPRH	2.80752	2.75439e-21	2.3211e-20
ENSG00000080546	SESN1	-1.6287	1.09209e-49	1.6837e-48
ENSG00000081041	CXCL2	4.88711	0	0
ENSG00000081051	AFP	5.80381	0.000461627	0.00143281
ENSG00000081479	LRP2	8.32751	2.46522e-11	1.38225e-10
ENSG00000082074	FYB	7.61262	3.4609e-09	1.7021e-08
ENSG00000082126	MPP4	1.51026	2.18222e-22	1.90504e-21
ENSG00000082196	C1QTNF3	-2.00335	0.00192483	0.00544713
ENSG00000082497	SERTAD4	-5.05532	7.42361e-67	1.45874e-65
ENSG00000083857	FAT1	-4.00442	0.00312615	0.0085415
ENSG00000084110	HAL	-1.50711	0.0161102	0.0382915
ENSG00000084628	NKAIN1	6.08778	2.07355e-33	2.38023e-32
ENSG00000084636	COL16A1	3.02463	2.20396e-38	2.79889e-37
ENSG00000085117	CD82	1.52157	1.70606e-140	6.07521e-139
ENSG00000085563	ABCB1	-1.70655	4.84646e-58	8.36043e-57
ENSG00000085831	TTC39A	2.62273	1.87856e-44	2.66612e-43
ENSG00000086991	NOX4	-1.82323	6.81774e-54	1.12579e-52
ENSG00000087076	HSD17B14	-2.01881	1.71218e-137	5.98846e-136
ENSG00000087085	ACHE	2.51344	0.000720197	0.00217417
ENSG00000087301	TXNDC16	-1.50945	1.42048e-26	1.40071e-25
ENSG00000088340	FER1L4	-2.0169	8.65093e-21	7.17536e-20
ENSG00000088756	ARHGAP28	-3.40412	4.58125e-37	5.66497e-36
ENSG00000088827	SIGLEC1	4.97819	0.00457764	0.0121257
ENSG00000088881	EBF4	-3.47077	6.83064e-19	5.32051e-18
ENSG00000088992	TESC	-4.71115	0.0191187	0.0447337
ENSG00000089127	OAS1	5.94508	0	0
ENSG00000089472	HEPH	3.41229	3.98464e-20	3.22819e-19
ENSG00000089692	LAG3	-2.29872	3.72908e-12	2.18855e-11
ENSG00000090339	ICAM1	3.29827	0	0
ENSG00000090376	IRAK3	2.11242	2.23823e-216	1.14102e-214
ENSG00000090554	FLT3LG	1.64113	0.0200139	0.0466365
ENSG00000091129	NRCAM	2.28574	0	0
ENSG00000091137	SLC26A4	-3.20986	2.96658e-15	2.01075e-14
ENSG00000091409	ITGA6	-2.74609	0	0
ENSG00000091536	MYO15A	2.17336	0.00053791	0.00165555
ENSG00000091972	CD200	-2.18183	1.89131e-38	2.40333e-37
ENSG00000092010	PSME1	1.55979	4.96321e-195	2.30709e-193
ENSG00000092051	JPH4	-2.23036	0.00694262	0.0178076
ENSG00000092096	SLC22A17	-4.09216	2.28716e-06	9.06434e-06
ENSG00000092529	CAPN3	2.44288	1.54618e-09	7.76504e-09
ENSG00000093134	VNN3	7.88024	4.98431e-10	2.59167e-09
ENSG00000095209	TMEM38B	1.66528	2.42422e-28	2.47986e-27
ENSG00000096696	DSP	8.62368	9.05148e-13	5.47879e-12
ENSG00000096968	JAK2	2.07237	6.26914e-170	2.5713e-168
ENSG00000096996	IL12RB1	8.77781	3.03821e-13	1.88655e-12
ENSG00000099219	ERMP1	-1.66783	2.62364e-63	4.88879e-62
ENSG00000099937	SERPIND1	2.65238	5.64269e-24	5.21003e-23
ENSG00000099942	CRKL	-2.02944	8.36262e-199	3.93808e-197
ENSG00000100024	UPB1	-3.08367	0.00685468	0.0176029
ENSG00000100027	YPEL1	-2.95125	1.40277e-20	1.15508e-19
ENSG00000100034	PPM1F	-1.75588	0	0
ENSG00000100053	CRYBB3	-2.09283	4.43301e-05	0.00015545
ENSG00000100055	CYTH4	2.95499	1.8677e-05	6.78229e-05
ENSG00000100078	PLA2G3	-5.97646	7.83274e-06	2.95161e-05
ENSG00000100100	PIK3IP1	-2.71433	8.31698e-134	2.86717e-132
ENSG00000100162	CENPM	-2.10913	5.30011e-18	3.99867e-17
ENSG00000100191	SLC5A4	-1.73211	2.63896e-08	1.23039e-07
ENSG00000100226	GTPBP1	2.31155	0	0
ENSG00000100292	HMOX1	3.035	0	0
ENSG00000100342	APOL1	2.88486	0	0
ENSG00000100346	CACNA1I	7.32043	5.78496e-17	4.1834e-16
ENSG00000100422	CERK	-1.5778	5.99317e-266	3.71181e-264
ENSG00000100526	CDKN3	-1.77958	7.45467e-24	6.84797e-23
ENSG00000100583	SAMD15	1.83498	0.00370934	0.0099922
ENSG00000100600	LGMN	2.36932	0	0
ENSG00000100767	PAPLN	1.68727	1.98048e-56	3.36278e-55
ENSG00000100906	NFKBIA	2.19244	0	0
ENSG00000100911	PSME2	2.22924	0	0
ENSG00000101057	MYBL2	-2.09323	1.39796e-95	3.66266e-94
ENSG00000101187	SLCO4A1	3.73683	3.87018e-147	1.43243e-145
ENSG00000101306	MYLK2	-5.1326	0.000463144	0.0014369
ENSG00000101307	SIRPB1	2.15935	2.06724e-11	1.16333e-10
ENSG00000101331	CCM2L	-3.30531	5.33826e-79	1.1871e-77
ENSG00000101333	PLCB4	-2.18899	0.00664452	0.0170937
ENSG00000101342	TLDC2	4.71183	8.82618e-41	1.16684e-39
ENSG00000101347	SAMHD1	4.02034	0	0
ENSG00000101412	E2F1	-1.71828	1.35934e-20	1.11974e-19
ENSG00000101605	MYOM1	2.60328	7.16158e-05	0.000245554
ENSG00000101665	SMAD7	-2.17873	1.94296e-20	1.5908e-19
ENSG00000101680	LAMA1	5.22587	1.0372e-05	3.86031e-05
ENSG00000101695	RNF125	-7.11197	8.64313e-08	3.87435e-07
ENSG00000102096	PIM2	2.1957	1.12834e-65	2.17566e-64
ENSG00000102271	KLHL4	-2.45281	4.81665e-102	1.3229e-100
ENSG00000102287	GABRE	2.69163	5.46554e-49	8.34895e-48
ENSG00000102385	DRP2	1.97525	5.88648e-10	3.04393e-09
ENSG00000102524	TNFSF13B	7.18004	3.43811e-167	1.39166e-165
ENSG00000102683	SGCG	-4.60816	0.0181065	0.0425359
ENSG00000102760	RGCC	-3.34684	1.40568e-31	1.54389e-30
ENSG00000102794	IRG1	11.2155	3.4647e-21	2.90833e-20
ENSG00000102802	MEDAG	-2.43697	1.51032e-100	4.10635e-99
ENSG00000102921	N4BP1	2.29702	0	0
ENSG00000102934	PLLP	-1.60023	2.31258e-19	1.83101e-18
ENSG00000102935	ZNF423	-4.34223	1.18833e-08	5.6689e-08
ENSG00000103044	HAS3	2.20777	6.40261e-30	6.74098e-29
ENSG00000103528	SYT17	-3.78095	0.000404257	0.00126583
ENSG00000104213	PDGFRL	2.26476	4.17828e-211	2.06667e-209
ENSG00000104312	RIPK2	2.52052	0	0
ENSG00000104432	IL7	1.72464	3.04236e-24	2.824e-23
ENSG00000104490	NCALD	-5.45384	0.000739215	0.0022294
ENSG00000104635	SLC39A14	2.38301	0	0
ENSG00000104856	RELB	2.18128	9.55507e-139	3.38024e-137
ENSG00000104951	IL4I1	3.31051	0	0
ENSG00000105246	EBI3	5.84809	2.56365e-36	3.10265e-35
ENSG00000105290	APLP1	-1.83868	2.56624e-08	1.19739e-07
ENSG00000105357	MYH14	6.45444	6.41649e-07	2.67178e-06
ENSG00000105402	NAPA	1.70051	0	0
ENSG00000105559	PLEKHA4	3.69376	0	0
ENSG00000105767	CADM4	-1.50974	6.38652e-08	2.89159e-07
ENSG00000105784	RUNDC3B	-2.44087	1.08814e-09	5.51986e-09
ENSG00000105792	C7orf63	2.11092	1.42848e-22	1.25822e-21
ENSG00000105835	NAMPT	2.47045	0	0
ENSG00000105877	DNAH11	2.94385	1.59215e-100	4.32341e-99
ENSG00000105894	PTN	2.77029	0.000638606	0.0019436
ENSG00000105939	ZC3HAV1	1.60073	0	0
ENSG00000105963	ADAP1	3.43451	2.82094e-06	1.10964e-05
ENSG00000105968	H2AFV	-1.90834	2.84622e-207	1.3825e-205
ENSG00000106034	CPED1	2.84212	5.69154e-07	2.38337e-06
ENSG00000106236	NPTX2	1.58641	2.04159e-08	9.59534e-08
ENSG00000106327	TFR2	1.63899	0.0160191	0.0380877
ENSG00000106526	ACTR3C	3.07782	0.000800103	0.00240031
ENSG00000106537	TSPAN13	-1.73532	4.91054e-63	9.12651e-62
ENSG00000106686	SPATA6L	2.21811	1.88085e-20	1.5417e-19
ENSG00000106785	TRIM14	3.89749	0	0
ENSG00000106799	TGFBR1	-1.5426	2.67069e-17	1.96417e-16
ENSG00000106952	TNFSF8	5.76256	2.36165e-05	8.48943e-05
ENSG00000107165	TYRP1	1.59539	0.000280801	0.000895604
ENSG00000107201	DDX58	4.71378	0	0
ENSG00000107562	CXCL12	-2.0619	4.00382e-14	2.58491e-13
ENSG00000107611	CUBN	-1.7429	4.02863e-37	4.98733e-36
ENSG00000107679	PLEKHA1	-1.50744	8.43491e-88	2.05547e-86
ENSG00000107719	PALD1	-2.7495	0	0
ENSG00000107731	UNC5B	-2.2526	5.42779e-93	1.39172e-91
ENSG00000107779	BMPR1A	-1.63609	0.00108446	0.00319094
ENSG00000107954	NEURL1	2.11224	0.00750356	0.0191351
ENSG00000107968	MAP3K8	1.62013	1.01065e-56	1.72009e-55
ENSG00000108001	EBF3	-3.17798	0.0040894	0.0109221
ENSG00000108342	CSF3	9.25894	6.47569e-70	1.31306e-68
ENSG00000108679	LGALS3BP	7.21967	1.52661e-212	7.63833e-211
ENSG00000108688	CCL7	10.1936	9.49826e-18	7.09906e-17
ENSG00000108691	CCL2	3.0628	0	0
ENSG00000108700	CCL8	10.8253	9.39441e-20	7.51796e-19
ENSG00000108771	DHX58	3.81214	0	0
ENSG00000108813	DLX4	4.63385	0.0049259	0.0129624
ENSG00000108821	COL1A1	4.18027	0.000145617	0.000482304
ENSG00000108947	EFNB3	-2.87239	2.77691e-05	9.90967e-05
ENSG00000109063	MYH3	1.88421	2.22992e-05	8.04536e-05
ENSG00000109265	KIAA1211	-1.63101	4.17486e-41	5.55662e-40
ENSG00000109272	PF4V1	5.71003	0.000250433	0.000805381
ENSG00000109320	NFKB1	2.05766	0	0
ENSG00000109321	AREG	6.74529	1.03017e-06	4.21247e-06
ENSG00000109458	GAB1	-1.89578	7.03817e-90	1.74661e-88
ENSG00000109794	FAM149A	-1.55362	0.0155044	0.0369777
ENSG00000110031	LPXN	2.34561	9.24663e-86	2.21335e-84
ENSG00000110042	DTX4	1.60143	0.00499458	0.0131272
ENSG00000110057	UNC93B1	3.58374	0	0
ENSG00000110077	MS4A6A	-2.90113	0.00366963	0.00989139
ENSG00000110218	PANX1	1.92179	5.14135e-164	2.03535e-162
ENSG00000110237	ARHGEF17	-1.68651	0	0
ENSG00000110446	SLC15A3	5.28019	2.77103e-259	1.6684e-257
ENSG00000110799	VWF	-2.0493	0	0
ENSG00000110848	CD69	3.47682	0.00159811	0.00458557
ENSG00000110881	ASIC1	-1.7895	0.000648011	0.00197084
ENSG00000110900	TSPAN11	-3.57715	4.5725e-42	6.2082e-41
ENSG00000110911	SLC11A2	1.73903	0	0
ENSG00000110944	IL23A	3.04316	1.37473e-13	8.68597e-13
ENSG00000111077	TENC1	-2.3201	0	0
ENSG00000111110	PPM1H	-2.57184	3.39516e-48	5.11047e-47
ENSG00000111254	AKAP3	2.59298	2.51765e-08	1.17612e-07
ENSG00000111266	DUSP16	1.98952	3.12501e-128	1.03441e-126
ENSG00000111319	SCNN1A	2.37741	0.00805448	0.0204148
ENSG00000111331	OAS3	5.45178	0	0
ENSG00000111335	OAS2	5.02766	0	0
ENSG00000111341	MGP	-2.06892	9.00277e-214	4.53601e-212
ENSG00000111424	VDR	2.04521	3.26848e-14	2.12157e-13
ENSG00000111679	PTPN6	1.88157	0.0062499	0.0161395
ENSG00000111799	COL12A1	-4.49578	3.15088e-23	2.82482e-22
ENSG00000111801	BTN3A3	2.77967	0	0
ENSG00000111912	NCOA7	1.76098	0	0
ENSG00000111913	FAM65B	2.85703	0.0114028	0.0280465
ENSG00000112053	SLC26A8	1.94344	5.05798e-05	0.000175995
ENSG00000112096	SOD2	5.93965	0	0
ENSG00000112139	MDGA1	3.11045	2.60033e-13	1.62024e-12
ENSG00000112182	BACH2	-1.95416	4.6735e-06	1.79651e-05
ENSG00000112183	RBM24	-2.83829	3.70298e-19	2.90105e-18
ENSG00000112294	ALDH5A1	-2.17942	0.000260763	0.000835763
ENSG00000112343	TRIM38	1.89084	0	0
ENSG00000112706	IMPG1	-2.74937	7.35747e-09	3.55219e-08
ENSG00000112773	FAM46A	3.84149	0	0
ENSG00000113211	PCDHB6	-4.98722	0.00480409	0.0126758
ENSG00000113212	PCDHB7	-2.17759	3.83808e-06	1.48781e-05
ENSG00000113448	PDE4D	-1.98152	9.47714e-115	2.86101e-113
ENSG00000113532	ST8SIA4	-2.19347	4.09943e-55	6.87425e-54
ENSG00000113721	PDGFRB	2.10861	0.000534381	0.00164516
ENSG00000113739	STC2	2.65471	0	0
ENSG00000113916	BCL6	2.03486	6.13436e-199	2.89507e-197
ENSG00000114127	XRN1	1.912	0	0
ENSG00000114268	PFKFB4	1.80338	7.86965e-20	6.31413e-19
ENSG00000114315	HES1	-3.81787	1.0737e-206	5.2036e-205
ENSG00000114654	EFCC1	-3.19289	2.37631e-14	1.54944e-13
ENSG00000114656	KIAA1257	-2.79308	0.0207243	0.0481103
ENSG00000114737	CISH	-2.73859	1.78401e-08	8.4232e-08
ENSG00000114923	SLC4A3	-3.87937	0.00423773	0.0112917
ENSG00000115008	IL1A	3.58572	5.82338e-61	1.04981e-59
ENSG00000115009	CCL20	7.45565	7.16979e-233	3.93338e-231
ENSG00000115155	OTOF	3.11161	0.00108742	0.00319876
ENSG00000115194	SLC30A3	3.84518	0.00777658	0.0197777
ENSG00000115232	ITGA4	-4.15488	1.38774e-19	1.10524e-18
ENSG00000115267	IFIH1	5.03677	8.5376e-269	5.38018e-267
ENSG00000115271	GCA	1.5399	1.03675e-32	1.16897e-31
ENSG00000115363	EVA1A	-1.61071	1.36277e-59	2.41247e-58
ENSG00000115415	STAT1	3.1854	0	0
ENSG00000115507	OTX1	-3.38061	4.10701e-05	0.000144276
ENSG00000115594	IL1R1	2.58306	0	0
ENSG00000115902	SLC1A4	-1.86178	1.36216e-39	1.77583e-38
ENSG00000115919	KYNU	6.21682	1.45598e-17	1.08222e-16
ENSG00000115963	RND3	1.51886	3.89924e-149	1.47604e-147
ENSG00000116132	PRRX1	4.40027	2.24438e-07	9.70828e-07
ENSG00000116191	RALGPS2	-1.53141	1.27141e-22	1.12307e-21
ENSG00000116194	ANGPTL1	5.06439	4.56764e-11	2.52505e-10
ENSG00000116396	KCNC4	-1.66883	1.12739e-44	1.60743e-43
ENSG00000116514	RNF19B	1.80398	3.1204e-227	1.66949e-225
ENSG00000116663	FBXO6	3.56378	9.76808e-211	4.8095e-209
ENSG00000116667	C1orf21	-2.14082	3.05209e-128	1.01182e-126
ENSG00000116701	NCF2	4.95433	1.82905e-15	1.24874e-14
ENSG00000116741	RGS2	1.8953	9.24643e-32	1.0197e-30
ENSG00000116774	OLFML3	2.37918	5.74552e-27	5.69677e-26
ENSG00000116819	TFAP2E	2.21207	0.00368124	0.00991896
ENSG00000116990	MYCL	-2.28599	5.99221e-06	2.28192e-05
ENSG00000117152	RGS4	-1.61205	4.84067e-27	4.81063e-26
ENSG00000117226	GBP3	2.99706	5.15566e-119	1.60345e-117
ENSG00000117228	GBP1	5.02786	0	0
ENSG00000117245	KIF17	2.28757	1.93559e-18	1.48415e-17
ENSG00000117266	CDK18	2.53296	1.54835e-08	7.33618e-08
ENSG00000117289	TXNIP	1.52709	1.21823e-184	5.40697e-183
ENSG00000117475	BLZF1	2.44036	6.33341e-270	4.01456e-268
ENSG00000117525	F3	1.81898	4.90227e-19	3.83228e-18
ENSG00000117594	HSD11B1	8.22385	4.76719e-11	2.63335e-10
ENSG00000117595	IRF6	-2.53052	1.13018e-81	2.57689e-80
ENSG00000117602	RCAN3	-1.98515	7.56884e-17	5.4479e-16
ENSG00000117632	STMN1	-1.61516	2.79454e-236	1.54882e-234
ENSG00000117834	SLC5A9	-2.67252	0.0103001	0.0255934
ENSG00000118160	SLC8A2	7.74623	1.415e-09	7.1261e-09
ENSG00000118322	ATP10B	4.58856	0.00344909	0.00934589
ENSG00000118407	FILIP1	-2.82708	1.42483e-85	3.39932e-84
ENSG00000118503	TNFAIP3	4.38546	0	0
ENSG00000118689	FOXO3	-1.54727	5.00801e-57	8.53691e-56
ENSG00000118777	ABCG2	-2.99317	2.42526e-81	5.49496e-80
ENSG00000118922	KLF12	-2.86765	9.42807e-75	2.00184e-73
ENSG00000119508	NR4A3	1.61514	0.00123698	0.00360634
ENSG00000119514	GALNT12	2.26819	4.08051e-13	2.51641e-12
ENSG00000119608	PROX2	-1.52454	0.000742229	0.00223724
ENSG00000119630	PGF	-1.62501	0	0
ENSG00000119681	LTBP2	-2.36355	0	0
ENSG00000119715	ESRRB	-4.54859	0.00338669	0.00919062
ENSG00000119900	OGFRL1	2.10184	0	0
ENSG00000119917	IFIT3	7.2264	0	0
ENSG00000119922	IFIT2	7.95883	0	0
ENSG00000120217	CD274	1.56428	1.95202e-134	6.78344e-133
ENSG00000120328	PCDHB12	-2.75154	1.02019e-05	3.80066e-05
ENSG00000120337	TNFSF18	3.30477	0	0
ENSG00000120457	KCNJ5	-2.39153	1.15537e-05	4.28431e-05
ENSG00000120539	MASTL	1.60867	8.30467e-74	1.74979e-72
ENSG00000120594	PLXDC2	-5.13626	0.00250341	0.00695069
ENSG00000120833	SOCS2	-3.85378	1.7553e-38	2.23313e-37
ENSG00000120899	PTK2B	2.70423	1.54589e-93	3.99693e-92
ENSG00000121101	TEX14	3.0566	1.42661e-07	6.27519e-07
ENSG00000121769	FABP3	-1.59067	0.00158217	0.00454345
ENSG00000121858	TNFSF10	3.14465	0	0
ENSG00000121895	TMEM156	1.64039	2.71908e-13	1.69277e-12
ENSG00000121933	ADORA3	1.56633	0.0174476	0.0411309
ENSG00000121966	CXCR4	-3.28457	0	0
ENSG00000122188	LAX1	5.28251	5.80911e-08	2.63734e-07
ENSG00000122547	EEPD1	-1.72032	0.000480835	0.001489
ENSG00000122641	INHBA	-1.80303	1.22086e-131	4.11684e-130
ENSG00000122643	NT5C3A	2.64883	7.32036e-265	4.50797e-263
ENSG00000122644	ARL4A	-2.47556	2.61172e-89	6.42964e-88
ENSG00000122862	SRGN	2.1375	0	0
ENSG00000122986	HVCN1	-1.57896	1.58185e-07	6.93121e-07
ENSG00000123095	BHLHE41	2.63119	6.80384e-13	4.14268e-12
ENSG00000123096	SSPN	2.53983	5.26e-09	2.5659e-08
ENSG00000123240	OPTN	1.52853	0	0
ENSG00000123342	MMP19	3.2599	4.8018e-37	5.93091e-36
ENSG00000123358	NR4A1	-1.82435	2.1779e-30	2.3167e-29
ENSG00000123384	LRP1	-1.93432	6.49662e-54	1.07358e-52
ENSG00000123572	NRK	3.67648	1.38536e-12	8.31793e-12
ENSG00000123609	NMI	2.26108	2.03869e-259	1.2309e-257
ENSG00000123610	TNFAIP6	11.7928	2.37147e-23	2.13314e-22
ENSG00000123685	BATF3	3.61121	1.20889e-18	9.33221e-18
ENSG00000123689	G0S2	5.64786	1.12081e-115	3.40258e-114
ENSG00000124019	FAM124B	-2.35022	0	0
ENSG00000124097	HMGB1P1	-2.56543	0.0128047	0.0311963
ENSG00000124102	PI3	9.09522	1.00386e-13	6.3913e-13
ENSG00000124143	ARHGAP40	2.35289	2.54321e-06	1.00313e-05
ENSG00000124145	SDC4	3.01012	0	0
ENSG00000124201	ZNFX1	2.39269	0	0
ENSG00000124212	PTGIS	1.53405	1.27032e-31	1.39593e-30
ENSG00000124225	PMEPA1	-3.02139	1.38757e-156	5.36537e-155
ENSG00000124226	RNF114	2.22356	0	0
ENSG00000124256	ZBP1	10.1092	3.30587e-17	2.42061e-16
ENSG00000124391	IL17C	4.79874	0.0116308	0.028565
ENSG00000124657	OR2B6	4.80503	0.010086	0.0251132
ENSG00000124749	COL21A1	-3.34051	3.4124e-06	1.32899e-05
ENSG00000124766	SOX4	-1.73831	4.63705e-301	3.25422e-299
ENSG00000124772	CPNE5	-3.12158	1.66054e-228	9.01822e-227
ENSG00000124875	CXCL6	7.43003	0	0
ENSG00000124882	EREG	7.16929	1.16343e-08	5.55624e-08
ENSG00000125148	MT2A	2.78962	0	0
ENSG00000125266	EFNB2	-3.23983	0	0
ENSG00000125347	IRF1	2.90252	0	0
ENSG00000125378	BMP4	-2.43392	0	0
ENSG00000125538	IL1B	12.4761	4.07646e-26	3.97261e-25
ENSG00000125730	C3	11.359	0	0
ENSG00000125735	TNFSF14	6.35714	8.47495e-06	3.18197e-05
ENSG00000125740	FOSB	1.96164	3.00921e-12	1.77765e-11
ENSG00000125810	CD93	-1.75262	0	0
ENSG00000125864	BFSP1	-1.76499	1.31085e-14	8.63576e-14
ENSG00000125910	S1PR4	-1.92568	0.000616812	0.00188204
ENSG00000125965	GDF5	3.31259	3.40073e-05	0.000120404
ENSG00000126549	STATH	5.78561	0.000156151	0.000515377
ENSG00000126562	WNK4	2.54906	1.28027e-66	2.49983e-65
ENSG00000126709	IFI6	6.36635	0	0
ENSG00000126778	SIX1	1.6418	7.96085e-10	4.0641e-09
ENSG00000126803	HSPA2	-1.81216	1.07867e-07	4.79346e-07
ENSG00000126838	PZP	-2.4716	2.22137e-10	1.17857e-09
ENSG00000126878	AIF1L	-2.43872	0	0
ENSG00000126882	FAM78A	-2.52753	2.41056e-100	6.52935e-99
ENSG00000126895	AVPR2	-1.93931	0.00724636	0.0185295
ENSG00000126950	TMEM35	-2.65115	9.48778e-81	2.13846e-79
ENSG00000127241	MASP1	-3.28338	0.000187885	0.000614205
ENSG00000127325	BEST3	4.70083	0.00285221	0.00784958
ENSG00000127585	FBXL16	-1.8478	0.00168149	0.00481205
ENSG00000127863	TNFRSF19	3.67234	3.97685e-25	3.7652e-24
ENSG00000127951	FGL2	2.0742	1.82203e-07	7.95137e-07
ENSG00000128165	ADM2	2.45379	0.00044156	0.00137388
ENSG00000128284	APOL3	2.15047	0	0
ENSG00000128285	MCHR1	3.90209	0.00571581	0.0148494
ENSG00000128335	APOL2	1.97444	0	0
ENSG00000128342	LIF	3.72832	2.09102e-45	3.01718e-44
ENSG00000128394	APOBEC3F	2.49466	1.38585e-55	2.33295e-54
ENSG00000128408	RIBC2	-2.01745	0.00401933	0.0107526
ENSG00000128564	VGF	4.12907	0.000190791	0.000623047
ENSG00000128567	PODXL	-2.19774	0	0
ENSG00000128578	STRIP2	2.58264	5.90641e-166	2.37299e-164
ENSG00000128594	LRRC4	-3.07591	5.58883e-24	5.1625e-23
ENSG00000128606	LRRC17	-2.46232	3.22569e-17	2.3627e-16
ENSG00000128617	OPN1SW	-2.58927	2.14085e-07	9.28051e-07
ENSG00000128645	HOXD1	-2.43402	5.10002e-06	1.95386e-05
ENSG00000128917	DLL4	-5.47981	0	0
ENSG00000129048	ACKR4	2.16789	1.85197e-41	2.48636e-40
ENSG00000129195	FAM64A	-1.81933	1.34287e-19	1.06989e-18
ENSG00000129221	AIPL1	6.24909	2.58565e-05	9.25312e-05
ENSG00000129226	CD68	3.65577	7.38328e-05	0.000252713
ENSG00000129270	MMP28	-5.51252	8.5746e-29	8.85101e-28
ENSG00000129422	MTUS1	-1.66565	0	0
ENSG00000129451	KLK10	7.25848	5.63078e-08	2.55907e-07
ENSG00000129667	RHBDF2	1.7703	0	0
ENSG00000129673	AANAT	3.88257	0.00590411	0.0153092
ENSG00000129951	LPPR3	-1.69137	0.00265256	0.00732344
ENSG00000130066	SAT1	1.86514	0	0
ENSG00000130201	EXOC3L2	-2.42035	0.000179311	0.000587155
ENSG00000130202	PVRL2	1.72171	0	0
ENSG00000130303	BST2	3.81202	0	0
ENSG00000130589	HELZ2	4.13281	0	0
ENSG00000130751	NPAS1	2.60458	0.014405	0.0346267
ENSG00000130775	THEMIS2	3.67992	0	0
ENSG00000130812	ANGPTL6	2.46689	0.00046984	0.00145642
ENSG00000130813	C19orf66	2.30079	1.96056e-244	1.1211e-242
ENSG00000130940	CASZ1	2.24233	4.94478e-45	7.09232e-44
ENSG00000131153	GINS2	-1.59854	2.736e-11	1.5305e-10
ENSG00000131203	IDO1	8.46773	4.54414e-15	3.05606e-14
ENSG00000131386	GALNT15	-2.60673	2.15922e-139	7.66363e-138
ENSG00000131435	PDLIM4	1.74885	1.35683e-238	7.57824e-237
ENSG00000131477	RAMP2	-2.43619	1.02583e-89	2.53409e-88
ENSG00000131634	TMEM204	-2.45943	6.37511e-202	3.0419e-200
ENSG00000131797	CLUHP3	2.56248	3.38541e-14	2.19483e-13
ENSG00000131831	RAI2	-1.66397	0.0010134	0.00299777
ENSG00000131979	GCH1	4.64903	0	0
ENSG00000132109	TRIM21	2.84213	0	0
ENSG00000132122	SPATA6	-1.7724	1.08998e-13	6.91923e-13
ENSG00000132274	TRIM22	1.83421	0	0
ENSG00000132530	XAF1	3.90473	0	0
ENSG00000132561	MATN2	-1.57026	0.0104834	0.0260069
ENSG00000132563	REEP2	-2.06656	4.48456e-12	2.61983e-11
ENSG00000132692	BCAN	1.5476	0.0034665	0.00938601
ENSG00000132698	RAB25	-4.80592	0.00838376	0.0211799
ENSG00000132840	BHMT2	1.9805	0.00971975	0.0242727
ENSG00000133019	CHRM3	-4.89039	0.000109389	0.000367892
ENSG00000133026	MYH10	-2.94229	0	0
ENSG00000133048	CHI3L1	7.54325	5.49148e-09	2.67459e-08
ENSG00000133083	DCLK1	-2.70912	4.41199e-06	1.69991e-05
ENSG00000133106	EPSTI1	7.07333	0	0
ENSG00000133110	POSTN	-2.66896	0	0
ENSG00000133149	TEX13A	5.0773	0.00372165	0.0100229
ENSG00000133321	RARRES3	5.31994	2.19508e-128	7.29948e-127
ENSG00000133687	TMTC1	2.38078	2.11721e-147	7.86315e-146
ENSG00000133800	LYVE1	-2.33239	5.39807e-128	1.78136e-126
ENSG00000134070	IRAK2	1.92297	7.5122e-249	4.34161e-247
ENSG00000134160	TRPM1	4.50075	0.00536062	0.0140109
ENSG00000134198	TSPAN2	-1.85782	0.0210366	0.048762
ENSG00000134215	VAV3	-2.20028	0.000130739	0.000435832
ENSG00000134243	SORT1	-3.15772	0	0
ENSG00000134253	TRIM45	-1.57665	9.51046e-07	3.90221e-06
ENSG00000134321	RSAD2	10.9732	0	0
ENSG00000134323	MYCN	-4.45986	2.55879e-46	3.74718e-45
ENSG00000134326	CMPK2	6.37148	7.23057e-103	2.00114e-101
ENSG00000134363	FST	2.17579	2.94537e-80	6.61104e-79
ENSG00000134463	ECHDC3	-1.89319	0.0144612	0.0347427
ENSG00000134470	IL15RA	2.11112	3.15679e-241	1.77693e-239
ENSG00000134508	CABLES1	-1.71941	5.15037e-99	1.38121e-97
ENSG00000134539	KLRD1	5.08307	9.3394e-09	4.48403e-08
ENSG00000134569	LRP4	-1.6475	0.0039679	0.0106265
ENSG00000134627	PIWIL4	1.6383	0.000153169	0.000506232
ENSG00000134668	SPOCD1	3.15005	0	0
ENSG00000134716	CYP2J2	5.41598	1.85454e-51	2.92811e-50
ENSG00000135047	CTSL	1.87013	0	0
ENSG00000135052	GOLM1	2.68455	0	0
ENSG00000135074	ADAM19	-1.99108	3.47736e-157	1.34701e-155
ENSG00000135114	OASL	11.8992	1.16608e-251	6.77551e-250
ENSG00000135124	P2RX4	2.2501	0	0
ENSG00000135148	TRAFD1	1.99953	1.94453e-231	1.05872e-229
ENSG00000135205	CCDC146	1.96529	3.36555e-16	2.3719e-15
ENSG00000135218	CD36	-6.49456	5.49072e-07	2.30316e-06
ENSG00000135248	FAM71F1	4.28589	0.0109269	0.026971
ENSG00000135312	HTR1B	-1.73926	5.24651e-87	1.26849e-85
ENSG00000135318	NT5E	1.54535	0	0
ENSG00000135324	MRAP2	-4.09094	1.25798e-64	2.38729e-63
ENSG00000135373	EHF	6.30886	1.5462e-05	5.66364e-05
ENSG00000135378	PRRG4	8.71885	1.48655e-12	8.92054e-12
ENSG00000135414	GDF11	-2.14107	8.72978e-96	2.28998e-94
ENSG00000135480	KRT7	-2.03927	6.81213e-175	2.84805e-173
ENSG00000135547	HEY2	-1.8101	1.574e-21	1.33367e-20
ENSG00000135604	STX11	1.98067	1.57246e-54	2.62057e-53
ENSG00000135697	BCMO1	4.06	4.5091e-05	0.000157837
ENSG00000135838	NPL	1.73898	0.00230781	0.00644073
ENSG00000135899	SP110	3.24158	0	0
ENSG00000135914	HTR2B	-2.21545	3.59326e-24	3.33197e-23
ENSG00000135932	CAB39	1.57011	4.67125e-295	3.23619e-293
ENSG00000136147	PHF11	1.73264	3.18527e-129	1.06413e-127
ENSG00000136235	GPNMB	1.8053	7.34711e-47	1.08401e-45
ENSG00000136244	IL6	5.78854	0	0
ENSG00000136492	BRIP1	2.09215	1.35162e-77	2.96601e-76
ENSG00000136514	RTP4	6.76373	2.72986e-171	1.13038e-169
ENSG00000136630	HLX	-1.71281	9.23647e-107	2.64783e-105
ENSG00000136826	KLF4	2.49191	2.48425e-44	3.50962e-43
ENSG00000136940	PDCL	-1.66733	2.41541e-87	5.85961e-86
ENSG00000136960	ENPP2	-5.6883	2.98942e-12	1.76644e-11
ENSG00000136982	DSCC1	-1.69011	1.33841e-06	5.41553e-06
ENSG00000136999	NOV	-1.73503	2.91397e-06	1.1427e-05
ENSG00000137193	PIM1	-1.6038	2.84713e-10	1.49953e-09
ENSG00000137198	GMPR	2.26328	0	0
ENSG00000137225	CAPN11	-1.67558	1.23944e-14	8.18032e-14
ENSG00000137462	TLR2	6.21495	0	0
ENSG00000137463	MGARP	-1.93181	0.000463065	0.00143686
ENSG00000137491	SLCO2B1	-2.49767	4.62833e-06	1.78009e-05
ENSG00000137496	IL18BP	2.79729	0	0
ENSG00000137628	DDX60	3.23756	0	0
ENSG00000137642	SORL1	-1.73614	0.000580024	0.00177606
ENSG00000137731	FXYD2	3.84779	0.00554463	0.0144516
ENSG00000137752	CASP1	3.45451	0	0
ENSG00000137767	SQRDL	2.39929	8.22006e-27	8.12793e-26
ENSG00000137825	ITPKA	2.5791	7.39641e-05	0.000253084
ENSG00000137831	UACA	-2.16615	0	0
ENSG00000137834	SMAD6	-1.54791	1.08504e-51	1.71944e-50
ENSG00000137842	TMEM62	2.83557	0	0
ENSG00000137872	SEMA6D	-2.10788	3.87696e-128	1.28135e-126
ENSG00000137880	GCHFR	-1.60722	3.82826e-12	2.24432e-11
ENSG00000137959	IFI44L	6.03209	0	0
ENSG00000137960	GIPC2	-1.96872	2.8286e-67	5.56833e-66
ENSG00000137965	IFI44	4.19247	0	0
ENSG00000137968	SLC44A5	-2.43035	5.29446e-23	4.71722e-22
ENSG00000138030	KHK	-1.95392	0.000140362	0.000465733
ENSG00000138035	PNPT1	2.94238	0	0
ENSG00000138061	CYP1B1	3.8246	1.88763e-17	1.39682e-16
ENSG00000138134	STAMBPL1	1.57951	3.52072e-05	0.000124448
ENSG00000138135	CH25H	2.54007	1.30072e-29	1.36019e-28
ENSG00000138172	CALHM2	-1.64157	2.08203e-65	4.00027e-64
ENSG00000138207	RBP4	4.91366	0.00978955	0.0244343
ENSG00000138311	ZNF365	-4.49126	7.16096e-08	3.2314e-07
ENSG00000138336	TET1	-3.00714	9.25986e-06	3.46523e-05
ENSG00000138347	MYPN	4.48629	8.0104e-21	6.64918e-20
ENSG00000138356	AOX1	5.6634	4.96654e-41	6.6022e-40
ENSG00000138378	STAT4	3.6987	6.77242e-07	2.81295e-06
ENSG00000138439	FAM117B	-2.40704	8.36605e-25	7.86569e-24
ENSG00000138496	PARP9	3.38708	0	0
ENSG00000138606	SHF	-1.68554	0.00222595	0.00623238
ENSG00000138642	HERC6	4.72692	0	0
ENSG00000138646	HERC5	6.71634	1.23723e-77	2.71776e-76
ENSG00000138650	PCDH10	-3.35221	0	0
ENSG00000138670	RASGEF1B	6.07733	5.07639e-06	1.9455e-05
ENSG00000138675	FGF5	1.75048	4.01892e-123	1.27561e-121
ENSG00000138685	FGF2	1.91007	7.03052e-148	2.62461e-146
ENSG00000138696	BMPR1B	2.20295	0.0053267	0.0139306
ENSG00000138755	CXCL9	4.68092	0.0117871	0.0289159
ENSG00000138792	ENPEP	3.20155	0.0109642	0.0270601
ENSG00000138798	EGF	4.19476	0.000322612	0.00102098
ENSG00000138835	RGS3	-1.92824	0	0
ENSG00000139055	ERP27	-2.47641	0.000622368	0.00189792
ENSG00000139155	SLCO1C1	-4.78467	0.000133985	0.000446032
ENSG00000139173	TMEM117	-1.86695	2.1683e-09	1.08065e-08
ENSG00000139180	NDUFA9	1.57357	6.47684e-16	4.50441e-15
ENSG00000139187	KLRG1	-3.3268	8.41223e-37	1.03078e-35
ENSG00000139263	LRIG3	1.8202	7.90585e-204	3.78902e-202
ENSG00000139278	GLIPR1	1.91913	1.99001e-289	1.34419e-287
ENSG00000139438	FAM222A	-1.9491	0.00025808	0.000828147
ENSG00000139549	DHH	-2.07723	5.53566e-06	2.11476e-05
ENSG00000139793	MBNL2	-1.52133	2.02183e-164	8.04821e-163
ENSG00000139971	C14orf37	-2.33625	8.19568e-11	4.47687e-10
ENSG00000140105	WARS	2.02812	0	0
ENSG00000140368	PSTPIP1	1.75836	0.0030099	0.00824472
ENSG00000140379	BCL2A1	6.84498	5.04847e-07	2.12136e-06
ENSG00000140464	PML	2.16485	0	0
ENSG00000140465	CYP1A1	-1.72624	4.14645e-13	2.55562e-12
ENSG00000140853	NLRC5	3.07225	0	0
ENSG00000140968	IRF8	5.52238	0.000591887	0.00181008
ENSG00000141150	RASL10B	-2.82602	7.10929e-06	2.69025e-05
ENSG00000141401	IMPA2	-2.10938	2.68962e-08	1.25267e-07
ENSG00000141497	ZMYND15	4.06201	1.02049e-32	1.15185e-31
ENSG00000141542	RAB40B	-1.70034	4.71597e-13	2.89425e-12
ENSG00000141574	SECTM1	7.08684	0	0
ENSG00000141668	CBLN2	2.27202	2.25422e-31	2.46085e-30
ENSG00000141682	PMAIP1	2.79481	0	0
ENSG00000141753	IGFBP4	-1.575	0	0
ENSG00000141837	CACNA1A	1.54856	1.69939e-11	9.60572e-11
ENSG00000141858	SAMD1	-1.54755	2.83885e-34	3.33126e-33
ENSG00000142089	IFITM3	2.52817	0	0
ENSG00000142303	ADAMTS10	-2.30036	1.00924e-49	1.5582e-48
ENSG00000142405	NLRP12	-5.04315	3.06386e-07	1.31139e-06
ENSG00000142606	MMEL1	3.23433	3.19856e-13	1.98327e-12
ENSG00000142611	PRDM16	6.75299	1.50002e-06	6.03217e-06
ENSG00000142677	IL22RA1	8.58343	1.29857e-12	7.81008e-12
ENSG00000142798	HSPG2	-1.75772	0	0
ENSG00000143126	CELSR2	-1.73317	4.66395e-11	2.57763e-10
ENSG00000143127	ITGA10	-1.59361	0	0
ENSG00000143140	GJA5	-10.7127	2.34855e-19	1.85676e-18
ENSG00000143226	FCGR2A	6.19056	2.50889e-05	8.99032e-05
ENSG00000143248	RGS5	-4.87651	0	0
ENSG00000143341	HMCN1	-3.05504	1.51555e-193	6.95513e-192
ENSG00000143452	HORMAD1	3.54536	3.07939e-07	1.31726e-06
ENSG00000143466	IKBKE	2.16723	5.60201e-195	2.59844e-193
ENSG00000143507	DUSP10	2.06223	5.37479e-23	4.78484e-22
ENSG00000143590	EFNA3	-1.92098	0.00418572	0.0111655
ENSG00000143603	KCNN3	-1.96996	1.01358e-18	7.86098e-18
ENSG00000143797	MBOAT2	-1.80841	3.69809e-12	2.17094e-11
ENSG00000143816	WNT9A	-5.29818	1.40117e-93	3.62711e-92
ENSG00000143847	PPFIA4	-4.17047	0.0110203	0.0271828
ENSG00000143869	GDF7	-4.20428	6.82557e-16	4.74235e-15
ENSG00000144063	MALL	-2.22613	3.1818e-88	7.78873e-87
ENSG00000144191	CNGA3	4.09659	2.15515e-06	8.56474e-06
ENSG00000144218	AFF3	3.27654	0.000637972	0.00194195
ENSG00000144229	THSD7B	5.50184	0.000610254	0.00186414
ENSG00000144354	CDCA7	-1.72967	9.61983e-21	7.96982e-20
ENSG00000144476	ACKR3	1.78816	1.36218e-210	6.6917e-209
ENSG00000144596	GRIP2	10.3778	3.75479e-18	2.84771e-17
ENSG00000144647	POMGNT2	1.53408	1.89589e-42	2.59858e-41
ENSG00000144802	NFKBIZ	4.48523	0	0
ENSG00000144810	COL8A1	1.69677	0	0
ENSG00000144837	PLA1A	5.0646	2.40475e-27	2.40642e-26
ENSG00000145362	ANK2	2.90884	7.32772e-07	3.03427e-06
ENSG00000145390	USP53	-1.50424	2.22126e-62	4.07924e-61
ENSG00000145428	RNF175	5.92323	2.24681e-05	8.10357e-05
ENSG00000145777	TSLP	3.83991	3.78671e-17	2.76613e-16
ENSG00000145779	TNFAIP8	1.65044	1.23252e-33	1.42085e-32
ENSG00000145901	TNIP1	2.4055	0	0
ENSG00000145911	N4BP3	-2.42389	0	0
ENSG00000145949	MYLK4	-1.77033	2.89632e-05	0.000103205
ENSG00000146006	LRRTM2	2.88317	3.02948e-18	2.30247e-17
ENSG00000146054	TRIM7	-1.96606	2.82431e-10	1.48824e-09
ENSG00000146374	RSPO3	3.63829	3.99846e-24	3.70136e-23
ENSG00000146425	DYNLT1	1.91235	0	0
ENSG00000146457	WTAP	2.50291	0	0
ENSG00000147036	LANCL3	-1.64908	0.0106216	0.0263257
ENSG00000147041	SYTL5	2.92519	0.00788047	0.0200184
ENSG00000147113	CXorf36	-4.87551	2.84622e-102	7.84706e-101
ENSG00000147180	ZNF711	-1.66944	3.14025e-09	1.54934e-08
ENSG00000147416	ATP6V1B2	1.70668	0	0
ENSG00000147454	SLC25A37	1.56545	4.05477e-184	1.79231e-182
ENSG00000147642	SYBU	-1.79628	8.33835e-12	4.79854e-11
ENSG00000147647	DPYS	5.3538	0.00111033	0.00326041
ENSG00000147676	MAL2	-2.68897	0.000674579	0.00204302
ENSG00000147697	GSDMC	1.81485	5.58195e-19	4.35731e-18
ENSG00000147852	VLDLR	1.53012	9.5677e-70	1.93276e-68
ENSG00000148123	LPPR1	-5.20896	0.00204698	0.00576413
ENSG00000148143	ZNF462	1.52767	2.36469e-75	5.05067e-74
ENSG00000148154	UGCG	1.92981	1.22212e-193	5.62045e-192
ENSG00000148346	LCN2	5.91141	8.57247e-05	0.000290977
ENSG00000148488	ST8SIA6	-1.79365	0.00160135	0.00459305
ENSG00000148848	ADAM12	-2.18132	0.0175284	0.0413035
ENSG00000149131	SERPING1	7.68582	1.60028e-36	1.94436e-35
ENSG00000149212	SESN3	-3.26215	1.4932e-32	1.67578e-31
ENSG00000149577	SIDT2	1.77356	0	0
ENSG00000149633	KIAA1755	1.98773	0.00483114	0.0127399
ENSG00000149948	HMGA2	1.92031	1.95032e-276	1.27746e-274
ENSG00000149968	MMP3	4.98485	0.00532774	0.0139317
ENSG00000150054	MPP7	-4.90187	0.00202736	0.00571334
ENSG00000150347	ARID5B	1.56115	4.81131e-120	1.5072e-118
ENSG00000150551	LYPD1	-2.28942	1.99595e-44	2.82902e-43
ENSG00000150630	VEGFC	1.73655	2.08304e-150	7.9269e-149
ENSG00000151014	CCRN4L	1.93205	4.09145e-65	7.81933e-64
ENSG00000151320	AKAP6	1.85535	0.000193365	0.000630595
ENSG00000151466	SCLT1	1.74292	5.24567e-47	7.76611e-46
ENSG00000151468	CCDC3	-3.7283	0.00695571	0.0178348
ENSG00000151617	EDNRA	6.39465	8.93523e-07	3.67806e-06
ENSG00000151651	ADAM8	2.53224	2.04355e-14	1.33367e-13
ENSG00000151690	MFSD6	-1.80208	6.90752e-33	7.82526e-32
ENSG00000151692	RNF144A	-2.24334	3.26408e-70	6.64969e-69
ENSG00000151789	ZNF385D	1.68353	4.7476e-09	2.32118e-08
ENSG00000151883	PARP8	3.72178	1.35509e-22	1.19552e-21
ENSG00000152076	CCDC74B	-2.30307	3.23764e-05	0.000114799
ENSG00000152137	HSPB8	1.51991	1.99316e-51	3.14468e-50
ENSG00000152213	ARL11	-2.96285	0.000161851	0.000533524
ENSG00000152217	SETBP1	-3.52255	4.28528e-72	8.86376e-71
ENSG00000152229	PSTPIP2	1.93635	3.44562e-19	2.70626e-18
ENSG00000152270	PDE3B	-2.09635	3.10738e-13	1.92839e-12
ENSG00000152402	GUCY1A2	-2.19438	1.22786e-05	4.54223e-05
ENSG00000152413	HOMER1	1.82718	5.44839e-06	2.08289e-05
ENSG00000152527	PLEKHH2	2.16009	0.000264951	0.00084818
ENSG00000152580	IGSF10	-5.85615	9.88171e-05	0.000333323
ENSG00000152661	GJA1	-1.55157	0	0
ENSG00000152778	IFIT5	3.70668	0	0
ENSG00000152932	RAB3C	-4.60165	0.00306224	0.00837852
ENSG00000152952	PLOD2	1.59041	0	0
ENSG00000153029	MR1	2.0492	1.09503e-93	2.83801e-92
ENSG00000153291	SLC25A27	-1.86651	2.29428e-10	1.21576e-09
ENSG00000153404	PLEKHG4B	4.99721	0.00112854	0.00330936
ENSG00000153561	RMND5A	-1.51192	1.87459e-52	3.00811e-51
ENSG00000153707	PTPRD	-2.52481	5.53179e-11	3.04481e-10
ENSG00000153721	CNKSR3	1.72408	2.70079e-145	9.89452e-144
ENSG00000153885	KCTD15	-2.48539	5.0449e-236	2.78889e-234
ENSG00000153933	DGKE	-1.6846	3.5235e-87	8.52862e-86
ENSG00000153993	SEMA3D	-1.56724	3.70121e-09	1.81822e-08
ENSG00000154027	AK5	-2.43426	0.0135365	0.0327981
ENSG00000154188	ANGPT1	3.21165	5.00455e-05	0.000174248
ENSG00000154217	PITPNC1	-2.25607	1.35434e-33	1.56045e-32
ENSG00000154319	FAM167A	3.03586	0.010855	0.0268245
ENSG00000154451	GBP5	8.94105	8.88978e-67	1.74209e-65
ENSG00000154639	CXADR	-1.96904	5.5639e-32	6.1737e-31
ENSG00000154642	C21orf91	1.6958	3.759e-32	4.19035e-31
ENSG00000154760	SLFN13	1.84673	1.11063e-19	8.86822e-19
ENSG00000154864	PIEZO2	-1.6175	1.54231e-54	2.5723e-53
ENSG00000154928	EPHB1	-2.23044	9.99301e-23	8.84879e-22
ENSG00000155287	SLC25A28	2.87643	0	0
ENSG00000155363	MOV10	2.19415	0	0
ENSG00000155511	GRIA1	6.82889	7.39986e-07	3.06179e-06
ENSG00000155629	PIK3AP1	5.1096	4.13639e-09	2.02556e-08
ENSG00000156103	MMP16	-2.20236	1.15313e-108	3.35013e-107
ENSG00000156206	C15orf26	1.91413	0.00317863	0.00866953
ENSG00000156219	ART3	3.3501	1.27082e-09	6.41045e-09
ENSG00000156466	GDF6	-2.83979	1.42411e-22	1.25488e-21
ENSG00000156500	FAM122C	1.94847	4.94216e-38	6.23248e-37
ENSG00000156535	CD109	-1.81535	0	0
ENSG00000156587	UBE2L6	3.09083	0	0
ENSG00000156804	FBXO32	-2.439	1.50546e-181	6.52115e-180
ENSG00000156966	B3GNT7	2.76054	3.18119e-10	1.66856e-09
ENSG00000157111	TMEM171	1.51242	1.56471e-71	3.22722e-70
ENSG00000157214	STEAP2	3.53013	1.36892e-124	4.40317e-123
ENSG00000157368	IL34	3.30166	2.66446e-09	1.32062e-08
ENSG00000157404	KIT	-3.97245	0	0
ENSG00000157423	HYDIN	4.89115	0.00136637	0.00396112
ENSG00000157551	KCNJ15	-1.65776	0.00384408	0.010332
ENSG00000157570	TSPAN18	-1.65076	1.50434e-258	8.98241e-257
ENSG00000157601	MX1	6.10402	0	0
ENSG00000158164	TMSB15A	-6.27192	1.20151e-05	4.44855e-05
ENSG00000158373	HIST1H2BD	2.87439	2.88371e-15	1.9558e-14
ENSG00000158406	HIST1H4H	2.6236	7.1956e-13	4.37136e-12
ENSG00000158457	TSPAN33	3.27402	0.00285772	0.00786174
ENSG00000158458	NRG2	3.57607	1.41526e-25	1.35718e-24
ENSG00000158555	GDPD5	-2.21472	5.41037e-219	2.79105e-217
ENSG00000158856	DMTN	-1.63195	1.96821e-79	4.39039e-78
ENSG00000159231	CBR3	2.17437	9.47765e-70	1.91636e-68
ENSG00000159388	BTG2	-2.16204	0	0
ENSG00000159399	HK2	1.64147	1.65627e-85	3.94276e-84
ENSG00000159403	C1R	7.21784	0	0
ENSG00000159450	TCHH	-4.23975	0.0100408	0.0250036
ENSG00000159640	ACE	-3.37778	0	0
ENSG00000159871	LYPD5	3.12751	1.69094e-06	6.77472e-06
ENSG00000159904	ZNF890P	-1.83653	0.0207804	0.0482199
ENSG00000160013	PTGIR	1.93496	3.09316e-91	7.81973e-90
ENSG00000160145	KALRN	-2.57069	1.97083e-47	2.9379e-46
ENSG00000160223	ICOSLG	4.96709	0	0
ENSG00000160224	AIRE	5.90763	8.91338e-05	0.000302027
ENSG00000160593	AMICA1	-6.70984	2.42955e-06	9.60226e-06
ENSG00000160710	ADAR	1.61385	0	0
ENSG00000160716	CHRNB2	2.16713	1.01389e-05	3.77783e-05
ENSG00000160862	AZGP1	2.30966	0.0164035	0.0389114
ENSG00000160886	LY6K	2.50331	2.7575e-06	1.08528e-05
ENSG00000160932	LY6E	4.53394	0	0
ENSG00000161091	MFSD12	1.84515	0	0
ENSG00000161133	USP41	3.82373	7.58202e-08	3.41784e-07
ENSG00000161509	GRIN2C	-2.23319	8.19405e-05	0.00027892
ENSG00000161570	CCL5	12.9718	1.42742e-54	2.38252e-53
ENSG00000161573	CCL16	-3.60101	3.01157e-06	1.17904e-05
ENSG00000161643	SIGLEC16	3.51417	0.0014694	0.00424103
ENSG00000161682	FAM171A2	-1.95915	9.0569e-40	1.18358e-38
ENSG00000161714	PLCD3	-1.72145	1.56732e-94	4.09151e-93
ENSG00000161798	AQP5	-4.75409	0.00257467	0.00713115
ENSG00000161921	CXCL16	2.41217	0	0
ENSG00000162032	SPSB3	-2.36157	0.000894139	0.00266687
ENSG00000162073	PAQR4	-2.10438	5.5506e-27	5.50855e-26
ENSG00000162078	ZG16B	2.62969	0.00725569	0.0185512
ENSG00000162105	SHANK2	5.49529	0.000971922	0.00288533
ENSG00000162366	PDZK1IP1	4.10595	6.54667e-30	6.8893e-29
ENSG00000162391	FAM151A	-4.17762	0.0176564	0.0415732
ENSG00000162407	PPAP2B	2.4482	0	0
ENSG00000162551	ALPL	-2.65386	2.3949e-05	8.60038e-05
ENSG00000162591	MEGF6	-2.40812	0	0
ENSG00000162595	DIRAS3	3.29445	8.30572e-74	1.74979e-72
ENSG00000162636	FAM102B	-1.60721	3.10785e-12	1.83291e-11
ENSG00000162645	GBP2	2.10189	0	0
ENSG00000162654	GBP4	5.30612	0	0
ENSG00000162687	KCNT2	2.08467	7.22541e-13	4.38577e-12
ENSG00000162692	VCAM1	2.6928	5.02564e-124	1.60932e-122
ENSG00000162722	TRIM58	-2.88784	0.0123368	0.0301753
ENSG00000162753	SLC9C2	5.18969	0.000393427	0.00123352
ENSG00000162772	ATF3	3.16077	2.63564e-122	8.34106e-121
ENSG00000162777	DENND2D	3.72729	7.45856e-10	3.81669e-09
ENSG00000162804	SNED1	-1.62391	3.19491e-193	1.46309e-191
ENSG00000162888	C1orf147	2.40563	2.55127e-08	1.19079e-07
ENSG00000162975	KCNF1	-5.2736	0.00138864	0.00401922
ENSG00000163040	CCDC74A	-1.61746	5.03332e-16	3.52088e-15
ENSG00000163053	SLC16A14	-2.62583	7.85146e-10	4.01109e-09
ENSG00000163072	NOSTRIN	-1.64517	6.93183e-10	3.55556e-09
ENSG00000163082	SGPP2	1.63257	0.000116873	0.000391417
ENSG00000163083	INHBB	-8.63619	9.44449e-85	2.2262e-83
ENSG00000163121	NEURL3	10.2712	1.35807e-23	1.23339e-22
ENSG00000163131	CTSS	4.52187	0	0
ENSG00000163154	TNFAIP8L2	2.25244	0.00764474	0.0194584
ENSG00000163251	FZD5	1.67212	1.44587e-39	1.88268e-38
ENSG00000163347	CLDN1	6.68814	1.98895e-75	4.26077e-74
ENSG00000163492	CCDC141	2.98878	0.00331262	0.00901112
ENSG00000163520	FBLN2	-2.68285	2.8582e-06	1.12287e-05
ENSG00000163545	NUAK2	3.28571	1.67769e-62	3.08887e-61
ENSG00000163568	AIM2	4.28366	4.18822e-08	1.92082e-07
ENSG00000163618	CADPS	4.08273	0.0186423	0.0436901
ENSG00000163629	PTPN13	-1.69942	1.29599e-08	6.17429e-08
ENSG00000163638	ADAMTS9	2.32846	0	0
ENSG00000163644	PPM1K	2.56541	3.885e-213	1.94836e-211
ENSG00000163659	TIPARP	1.5091	1.3233e-161	5.21003e-160
ENSG00000163661	PTX3	3.13907	0	0
ENSG00000163673	DCLK3	5.3388	0.000216106	0.000700636
ENSG00000163694	RBM47	4.57546	8.98067e-06	3.36581e-05
ENSG00000163734	CXCL3	6.52005	4.01496e-266	2.49377e-264
ENSG00000163735	CXCL5	8.79728	4.25797e-240	2.38435e-238
ENSG00000163739	CXCL1	5.81225	0	0
ENSG00000163814	CDCP1	3.52413	1.1668e-264	7.16487e-263
ENSG00000163840	DTX3L	2.94463	0	0
ENSG00000163874	ZC3H12A	3.40886	0	0
ENSG00000163898	LIPH	5.2144	0.000297963	0.000947269
ENSG00000163935	SFMBT1	1.8778	5.61709e-21	4.69866e-20
ENSG00000164035	EMCN	-2.19409	2.5008e-296	1.73809e-294
ENSG00000164070	HSPA4L	-1.72984	1.82477e-58	3.17572e-57
ENSG00000164093	PITX2	4.47518	8.46038e-08	3.79637e-07
ENSG00000164107	HAND2	-1.88612	1.65438e-13	1.03982e-12
ENSG00000164125	FAM198B	-2.87835	0	0
ENSG00000164161	HHIP	-2.29028	0	0
ENSG00000164176	EDIL3	-2.62127	1.02506e-102	2.83334e-101
ENSG00000164270	HTR4	4.75039	0.00211941	0.00595489
ENSG00000164283	ESM1	-2.08985	0	0
ENSG00000164294	GPX8	-1.63804	9.84413e-159	3.83389e-157
ENSG00000164303	ENPP6	4.98532	0.00605344	0.0156738
ENSG00000164308	ERAP2	1.75198	9.32427e-91	2.33539e-89
ENSG00000164342	TLR3	4.2711	0	0
ENSG00000164400	CSF2	11.2336	3.25974e-21	2.73841e-20
ENSG00000164442	CITED2	1.56472	0	0
ENSG00000164451	FAM26D	-5.6597	4.50494e-05	0.000157717
ENSG00000164520	RAET1E	1.98632	0.0018977	0.00537599
ENSG00000164604	GPR85	-2.36453	3.85095e-08	1.77103e-07
ENSG00000164627	KIF6	4.57565	7.33098e-29	7.57453e-28
ENSG00000164638	SLC29A4	-2.29906	3.04284e-24	2.824e-23
ENSG00000164647	STEAP1	1.7766	1.86628e-110	5.51087e-109
ENSG00000164674	SYTL3	3.48864	1.99768e-35	2.38168e-34
ENSG00000164684	ZNF704	-2.83799	1.00405e-187	4.50261e-186
ENSG00000164687	FABP5	-2.80687	3.16186e-260	1.91438e-258
ENSG00000164692	COL1A2	-1.74368	9.61279e-127	3.15297e-125
ENSG00000164761	TNFRSF11B	3.64503	4.56074e-42	6.19613e-41
ENSG00000164823	OSGIN2	1.55504	8.83963e-131	2.97152e-129
ENSG00000164845	FAM86FP	1.56517	0.00525665	0.0137591
ENSG00000164849	GPR146	-2.90462	7.43373e-34	8.63407e-33
ENSG00000164867	NOS3	-2.24548	0	0
ENSG00000164929	BAALC	-1.87519	3.68965e-05	0.000130143
ENSG00000164938	TP53INP1	-1.95502	3.98255e-196	1.85523e-194
ENSG00000165028	NIPSNAP3B	-2.38772	0.00361928	0.00976664
ENSG00000165071	TMEM71	-2.21108	7.34451e-07	3.04063e-06
ENSG00000165185	KIAA1958	-1.76851	6.4832e-06	2.46066e-05
ENSG00000165194	PCDH19	-2.22209	1.25404e-06	5.08366e-06
ENSG00000165244	ZNF367	-1.65554	8.51513e-15	5.66322e-14
ENSG00000165246	NLGN4Y	-2.12003	0.00463825	0.0122757
ENSG00000165388	ZNF488	-5.06477	0.00389518	0.0104537
ENSG00000165434	PGM2L1	-1.96896	7.63163e-186	3.41527e-184
ENSG00000165507	C10orf10	-2.75611	0	0
ENSG00000165617	DACT1	-3.83565	0.00672288	0.0172768
ENSG00000165659	DACH1	-2.43715	4.18541e-39	5.40428e-38
ENSG00000165716	FAM69B	-1.53197	3.91786e-120	1.23088e-118
ENSG00000165731	RET	8.52852	1.73034e-12	1.03519e-11
ENSG00000165807	PPP1R36	-3.59382	0.0134024	0.032495
ENSG00000165810	BTNL9	-5.51363	0.000839171	0.00251159
ENSG00000165821	SALL2	-3.45289	2.74527e-07	1.17829e-06
ENSG00000165923	AGBL2	4.51043	7.66241e-08	3.44904e-07
ENSG00000165949	IFI27	2.8521	0	0
ENSG00000166002	SMCO4	-1.68529	1.69175e-10	9.03341e-10
ENSG00000166145	SPINT1	-2.04677	0.000751607	0.00226362
ENSG00000166257	SCN3B	-2.10982	1.28484e-07	5.6735e-07
ENSG00000166265	CYYR1	-2.73375	3.46284e-64	6.53705e-63
ENSG00000166341	DCHS1	-1.58036	0	0
ENSG00000166387	PPFIBP2	-1.74181	3.63836e-08	1.67575e-07
ENSG00000166670	MMP10	2.41266	1.24045e-299	8.67714e-298
ENSG00000166707	ZCCHC18	-1.64659	2.59138e-05	9.27209e-05
ENSG00000166710	B2M	2.13621	0	0
ENSG00000166750	SLFN5	1.92091	0	0
ENSG00000166831	RBPMS2	-2.25333	0.000293418	0.000933917
ENSG00000166863	TAC3	5.03796	0.00509611	0.0133745
ENSG00000166889	PATL1	1.80365	0	0
ENSG00000166920	C15orf48	7.48174	4.62896e-18	3.50088e-17
ENSG00000166923	GREM1	3.81845	0.00238915	0.00665226
ENSG00000167034	NKX3-1	3.80885	5.66003e-62	1.03242e-60
ENSG00000167037	SGSM1	-3.33554	1.2745e-06	5.1637e-06
ENSG00000167207	NOD2	6.17641	2.0864e-07	9.05393e-07
ENSG00000167261	DPEP2	-4.67153	5.03069e-06	1.92833e-05
ENSG00000167550	RHEBL1	2.2412	8.1405e-21	6.75458e-20
ENSG00000167552	TUBA1A	-1.5519	0	0
ENSG00000167619	TMEM145	4.59573	0.00315147	0.00860632
ENSG00000167641	PPP1R14A	-4.86873	2.06865e-23	1.86386e-22
ENSG00000167642	SPINT2	-1.70379	8.21873e-19	6.38562e-18
ENSG00000167644	C19orf33	-4.84589	0.00122743	0.00358138
ENSG00000167772	ANGPTL4	3.07413	0	0
ENSG00000167779	IGFBP6	3.07052	2.0756e-110	6.12063e-109
ENSG00000167861	HID1	-2.52228	2.48153e-246	1.42276e-244
ENSG00000167889	MGAT5B	-1.84329	9.50265e-06	3.55056e-05
ENSG00000167912	RP11-25K19.1	-1.62775	4.76116e-09	2.32728e-08
ENSG00000167984	NLRC3	-1.93525	2.39535e-10	1.26745e-09
ENSG00000167995	BEST1	2.12278	0.000118279	0.000395821
ENSG00000168016	TRANK1	2.49513	0	0
ENSG00000168062	BATF2	6.24608	0	0
ENSG00000168077	SCARA3	-3.18757	0	0
ENSG00000168263	KCNV2	4.81265	0.00794762	0.0201771
ENSG00000168268	NT5DC2	-2.26124	1.453e-305	1.03311e-303
ENSG00000168274	HIST1H2AE	3.2733	0.00262319	0.00725161
ENSG00000168306	ACOX2	-1.93795	0.000279215	0.000890808
ENSG00000168310	IRF2	1.60999	2.74617e-122	8.67812e-121
ENSG00000168389	MFSD2A	1.9458	2.28792e-10	1.21269e-09
ENSG00000168394	TAP1	4.47063	0.00638739	0.0164655
ENSG00000168404	MLKL	2.04509	6.20596e-290	4.20508e-288
ENSG00000168671	UGT3A2	5.91368	0.000182067	0.000595727
ENSG00000168672	FAM84B	-2.10096	2.86414e-215	1.44984e-213
ENSG00000168679	SLC16A4	2.11023	1.05816e-85	2.53011e-84
ENSG00000168685	IL7R	6.86938	1.01697e-131	3.44543e-130
ENSG00000168702	LRP1B	2.01324	0.00502551	0.0132053
ENSG00000168811	IL12A	1.97642	3.93981e-09	1.93323e-08
ENSG00000168824	NSG1	-1.91119	2.1101e-66	4.11271e-65
ENSG00000168961	LGALS9	3.30962	0	0
ENSG00000169083	AR	-1.71755	5.77403e-65	1.09961e-63
ENSG00000169100	SLC25A6	-6.11789	0.00014261	0.000472997
ENSG00000169122	FAM110B	-5.37914	0.0031802	0.00867272
ENSG00000169129	AFAP1L2	-4.88082	5.1853e-12	3.01859e-11
ENSG00000169184	MN1	-2.63957	2.00305e-53	3.27008e-52
ENSG00000169242	EFNA1	-2.05608	1.07714e-226	5.74874e-225
ENSG00000169245	CXCL10	15.3126	2.17847e-75	4.66215e-74
ENSG00000169248	CXCL11	8.78401	0	0
ENSG00000169252	ADRB2	2.18674	7.24671e-34	8.42138e-33
ENSG00000169429	IL8	7.36517	0	0
ENSG00000169432	SCN9A	-3.91677	7.56338e-11	4.14194e-10
ENSG00000169439	SDC2	-4.17476	7.2891e-15	4.85678e-14
ENSG00000169660	HEXDC	2.02567	7.92716e-105	2.22816e-103
ENSG00000169715	MT1E	2.09134	3.5527e-175	1.494e-173
ENSG00000169744	LDB2	-1.96876	4.741e-252	2.76218e-250
ENSG00000169860	P2RY1	-3.39658	0.000732913	0.00221132
ENSG00000169871	TRIM56	1.6763	1.89301e-221	9.85961e-220
ENSG00000169926	KLF13	-1.80876	2.21545e-268	1.39206e-266
ENSG00000169994	MYO7B	-3.04812	2.42603e-16	1.71873e-15
ENSG00000170044	ZPLD1	4.88099	0.00683476	0.0175539
ENSG00000170209	ANKK1	5.05074	4.07425e-07	1.72575e-06
ENSG00000170214	ADRA1B	-2.4089	0.00254663	0.00706434
ENSG00000170271	FAXDC2	-1.69999	4.03135e-43	5.58574e-42
ENSG00000170298	LGALS9B	2.00803	1.32094e-05	4.87236e-05
ENSG00000170323	FABP4	-7.61742	0	0
ENSG00000170345	FOS	1.90888	4.95004e-07	2.08176e-06
ENSG00000170382	LRRN2	5.09536	1.70573e-13	1.07147e-12
ENSG00000170464	DNAJC18	-1.50199	1.6175e-52	2.59749e-51
ENSG00000170537	TMC7	-1.93585	3.63663e-47	5.39135e-46
ENSG00000170581	STAT2	3.28305	0	0
ENSG00000170647	TMEM133	-2.13815	0.00223009	0.00624155
ENSG00000170745	KCNS3	-1.76821	0.00204311	0.00575399
ENSG00000170873	MTSS1	-1.69636	3.27615e-180	1.41345e-178
ENSG00000170891	CYTL1	-1.83656	3.00169e-212	1.48811e-210
ENSG00000170915	PAQR8	-1.55973	5.84515e-28	5.92047e-27
ENSG00000170955	PRKCDBP	-1.76938	3.05289e-182	1.33041e-180
ENSG00000170961	HAS2	3.4544	1.12064e-08	5.35307e-08
ENSG00000171219	CDC42BPG	-1.5388	0.00989872	0.0246811
ENSG00000171227	TMEM37	-2.02115	2.85074e-26	2.78818e-25
ENSG00000171236	LRG1	5.1749	5.79293e-23	5.15073e-22
ENSG00000171246	NPTX1	5.13077	4.73236e-09	2.31425e-08
ENSG00000171388	APLN	-1.66341	0	0
ENSG00000171476	HOPX	-2.69902	1.96189e-42	2.68734e-41
ENSG00000171505	OR1N1	4.68063	0.0212898	0.0492643
ENSG00000171509	RXFP1	7.16487	1.15399e-07	5.11346e-07
ENSG00000171604	CXXC5	-2.00375	2.95084e-17	2.16505e-16
ENSG00000171631	P2RY6	2.02776	0.00364038	0.00981622
ENSG00000171695	C20orf201	-2.5772	0.0213301	0.0493471
ENSG00000171714	ANO5	1.91334	2.49918e-10	1.32175e-09
ENSG00000171724	VAT1L	-2.44571	1.81196e-14	1.18504e-13
ENSG00000171812	COL8A2	1.79497	2.03362e-09	1.0147e-08
ENSG00000171848	RRM2	-1.60534	1.68029e-95	4.39704e-94
ENSG00000171855	IFNB1	9.08521	1.1519e-13	7.30581e-13
ENSG00000171860	C3AR1	4.58314	4.90027e-64	9.21839e-63
ENSG00000171864	PRND	-5.72359	0.000251139	0.000806992
ENSG00000171914	TLN2	-1.82653	4.3789e-07	1.85044e-06
ENSG00000171989	LDHAL6B	-1.80926	0.00738641	0.0188564
ENSG00000172164	SNTB1	-3.07011	7.45194e-10	3.8142e-09
ENSG00000172183	ISG20	5.73403	0	0
ENSG00000172216	CEBPB	2.65391	2.23129e-18	1.70542e-17
ENSG00000172243	CLEC7A	4.41053	1.39265e-08	6.62313e-08
ENSG00000172348	RCAN2	-5.10101	2.68544e-05	9.59276e-05
ENSG00000172350	ABCG4	-1.66005	0.0193145	0.045116
ENSG00000172399	MYOZ2	-4.98248	5.50295e-05	0.00019065
ENSG00000172403	SYNPO2	3.9013	5.56459e-16	3.88497e-15
ENSG00000172572	PDE3A	-2.09675	2.04465e-212	1.02067e-210
ENSG00000172733	PURG	-1.58071	3.38229e-06	1.31845e-05
ENSG00000172794	RAB37	-2.59593	0.000230342	0.000744111
ENSG00000172828	CES3	4.20642	1.45854e-05	5.35982e-05
ENSG00000172936	MYD88	2.27727	0	0
ENSG00000173083	HPSE	2.08834	0	0
ENSG00000173110	HSPA6	3.1097	0.0182857	0.042924
ENSG00000173114	LRRN3	3.16205	0.0137697	0.0332846
ENSG00000173193	PARP14	3.3776	0	0
ENSG00000173210	ABLIM3	1.51892	0	0
ENSG00000173258	ZNF483	-2.34035	0.000262718	0.000841405
ENSG00000173269	MMRN2	-1.774	0	0
ENSG00000173320	STOX2	-3.35376	0.00200883	0.00566556
ENSG00000173334	TRIB1	2.83613	2.79104e-284	1.86775e-282
ENSG00000173432	SAA1	7.44532	1.89752e-08	8.93962e-08
ENSG00000173530	TNFRSF10D	-2.08446	0	0
ENSG00000173535	TNFRSF10C	-1.80701	3.68588e-255	2.16495e-253
ENSG00000173559	NABP1	1.6951	0	0
ENSG00000173567	GPR113	1.8669	5.44832e-08	2.47719e-07
ENSG00000173598	NUDT4	-2.33799	0	0
ENSG00000173626	TRAPPC3L	5.75835	6.41874e-07	2.67221e-06
ENSG00000173762	CD7	7.53356	1.54382e-09	7.75498e-09
ENSG00000173786	CNP	2.28225	0	0
ENSG00000173821	RNF213	2.78063	0	0
ENSG00000173918	C1QTNF1	2.86084	0	0
ENSG00000173947	PIFO	-3.25528	0.000394952	0.00123795
ENSG00000174059	CD34	-3.28845	0	0
ENSG00000174136	RGMB	1.74598	2.8759e-255	1.69843e-253
ENSG00000174175	SELP	-2.21502	4.08822e-49	6.2716e-48
ENSG00000174348	PODN	2.6436	1.20537e-51	1.90872e-50
ENSG00000174370	C11orf45	-2.128	1.03017e-15	7.09594e-15
ENSG00000174371	EXO1	-1.51666	2.04517e-08	9.61006e-08
ENSG00000174521	TTC9B	-1.68642	0.0111204	0.0274016
ENSG00000174669	SLC29A2	-2.10307	8.74831e-06	3.28119e-05
ENSG00000174808	BTC	5.64306	7.22209e-12	4.16963e-11
ENSG00000174837	EMR1	5.34752	0.00125073	0.00364446
ENSG00000174839	DENND6A	-1.89068	1.58345e-54	2.63684e-53
ENSG00000175040	CHST2	1.92698	1.25532e-92	3.2111e-91
ENSG00000175130	MARCKSL1	-1.70748	3.71634e-287	2.49468e-285
ENSG00000175183	CSRP2	-1.68701	0.00043938	0.00136749
ENSG00000175264	CHST1	-3.71755	0	0
ENSG00000175518	UBQLNL	2.91971	0.000115695	0.000387833
ENSG00000175544	CABP4	1.84769	2.06445e-08	9.69225e-08
ENSG00000175567	UCP2	-1.55711	0.00104863	0.00309477
ENSG00000175592	FOSL1	1.94618	0	0
ENSG00000175874	CREG2	-2.08293	5.40373e-06	2.06692e-05
ENSG00000175898	CTD-2369P2.2	1.98508	2.95146e-06	1.15635e-05
ENSG00000175899	A2M	-2.32991	7.75065e-155	2.99161e-153
ENSG00000176046	NUPR1	-1.71437	2.58053e-46	3.77645e-45
ENSG00000176244	ACBD7	-3.23241	0.000651762	0.00198085
ENSG00000176435	CLEC14A	-2.24108	0	0
ENSG00000176438	SYNE3	-1.96057	4.33829e-57	7.40111e-56
ENSG00000176533	GNG7	-4.38245	2.17774e-10	1.1557e-09
ENSG00000176658	MYO1D	-2.11048	0	0
ENSG00000176912	C18orf56	-1.84742	0.016958	0.0400773
ENSG00000176927	EFCAB5	1.87927	0.000663935	0.00201417
ENSG00000176928	GCNT4	3.37157	1.22822e-13	7.78079e-13
ENSG00000176973	FAM89B	-1.60188	0.000114775	0.000384809
ENSG00000177030	DEAF1	-1.5082	4.24467e-111	1.25855e-109
ENSG00000177098	SCN4B	-4.9788	0.00491428	0.0129379
ENSG00000177409	SAMD9L	3.18955	0	0
ENSG00000177674	AGTRAP	1.78526	2.81562e-182	1.22949e-180
ENSG00000177685	EFCAB4A	-2.00011	7.81466e-52	1.2411e-50
ENSG00000177699	RP11-16K12.1	4.04357	0.0200212	0.0466486
ENSG00000177989	ODF3B	4.85697	2.34499e-31	2.55865e-30
ENSG00000178015	GPR150	2.08225	1.49548e-15	1.02423e-14
ENSG00000178175	ZNF366	-2.69048	7.2717e-05	0.000249054
ENSG00000178217	SH2D4B	4.51583	0.0190488	0.0445848
ENSG00000178531	CTXN1	-1.93971	1.28129e-39	1.6714e-38
ENSG00000178538	CA8	2.32391	0.000662973	0.0020121
ENSG00000178573	MAF	-3.25865	5.65198e-07	2.36805e-06
ENSG00000178685	PARP10	2.56631	0	0
ENSG00000178695	KCTD12	-1.58358	0	0
ENSG00000178726	THBD	-3.05982	0	0
ENSG00000178752	FAM132B	2.78056	4.67133e-06	1.79599e-05
ENSG00000178826	TMEM139	2.3842	0.0165023	0.0391329
ENSG00000178860	MSC	5.79602	4.5244e-05	0.000158347
ENSG00000178882	FAM101A	2.27275	6.56274e-37	8.06904e-36
ENSG00000178947	LINC00086	-3.67665	1.74741e-11	9.86939e-11
ENSG00000178972	AC097658.1	-1.89875	0.00739638	0.0188796
ENSG00000178977	LINC00324	-2.47451	0.0153469	0.0366424
ENSG00000179104	TMTC2	-1.92187	3.1628e-31	3.43364e-30
ENSG00000179165	PXT1	5.8479	1.54039e-05	5.64329e-05
ENSG00000179253	RP11-429E11.3	4.14922	0.00333438	0.00906231
ENSG00000179314	WSCD1	-2.5526	0	0
ENSG00000179403	VWA1	-1.72088	1.71565e-06	6.8712e-06
ENSG00000179546	HTR1D	-3.12233	1.88003e-09	9.39144e-09
ENSG00000179593	ALOX15B	4.9684	0.00559658	0.0145694
ENSG00000179627	ZBTB42	1.7577	2.58384e-42	3.53255e-41
ENSG00000179715	PCED1B	-1.74613	2.8607e-10	1.50594e-09
ENSG00000179826	MRGPRX3	5.23039	0.00286974	0.00789179
ENSG00000179846	NKPD1	-2.83939	0.0120232	0.0294684
ENSG00000179855	GIPC3	-3.34172	5.76721e-21	4.82237e-20
ENSG00000180178	FAR2P1	-4.98333	0.004485	0.0118978
ENSG00000180229	HERC2P3	-1.56094	0.000121719	0.000406892
ENSG00000180447	GAS1	-4.89343	0.0010405	0.00307288
ENSG00000180537	RNF182	-4.02012	0.0169968	0.0401558
ENSG00000180573	HIST1H2AC	2.24063	7.98269e-11	4.36383e-10
ENSG00000180592	SKIDA1	1.85877	3.58607e-06	1.39362e-05
ENSG00000180596	HIST1H2BC	2.62605	1.73391e-13	1.08854e-12
ENSG00000180801	ARSJ	1.55401	7.27038e-189	3.28078e-187
ENSG00000180846	CSNK1G2-AS1	-1.64128	0.0133604	0.0324042
ENSG00000180921	FAM83H	1.70611	1.99133e-05	7.20741e-05
ENSG00000180998	GPR137C	-3.51754	3.00159e-31	3.26027e-30
ENSG00000181013	C17orf47	3.72958	0.0107307	0.0265443
ENSG00000181104	F2R	-1.70142	0	0
ENSG00000181350	FAM211A	-1.91655	2.96036e-09	1.46225e-08
ENSG00000181355	OFCC1	5.55349	0.000629143	0.00191696
ENSG00000181381	DDX60L	3.81754	0	0
ENSG00000181541	MAB21L2	5.728	3.48278e-05	0.000123168
ENSG00000181634	TNFSF15	3.63652	1.71133e-47	2.55282e-46
ENSG00000181652	ATG9B	-3.27074	6.19665e-16	4.31232e-15
ENSG00000181744	C3orf58	-1.79684	1.20616e-131	4.0736e-130
ENSG00000182107	TMEM30B	2.00915	0.000291335	0.000927698
ENSG00000182156	ENPP7	4.93479	0.00756557	0.0192774
ENSG00000182179	UBA7	1.79688	0	0
ENSG00000182326	C1S	8.52693	0	0
ENSG00000182492	BGN	-2.10044	0	0
ENSG00000182508	LHFPL1	4.1175	0.000154198	0.000509397
ENSG00000182545	RNASE10	-6.21015	2.79466e-06	1.0997e-05
ENSG00000182585	EPGN	3.57536	1.9613e-06	7.81446e-06
ENSG00000182621	PLCB1	-1.86626	1.69935e-65	3.26793e-64
ENSG00000182648	LINC01006	-2.67408	0.015069	0.0360305
ENSG00000182791	CCDC87	2.21403	0.00061267	0.00187099
ENSG00000182809	CRIP2	-2.91674	0	0
ENSG00000182851	GPIHBP1	-4.6765	2.01289e-23	1.81437e-22
ENSG00000182853	VMO1	3.93756	1.60914e-06	6.45899e-06
ENSG00000182870	GALNT9	5.4997	3.27466e-18	2.48706e-17
ENSG00000182901	RGS7	4.50794	1.47511e-05	5.41884e-05
ENSG00000183090	FREM3	-2.56549	0.0162405	0.0385714
ENSG00000183196	CHST6	-5.9057	0.000138526	0.000460228
ENSG00000183347	GBP6	4.98926	0.00421403	0.0112369
ENSG00000183486	MX2	8.54609	0	0
ENSG00000183496	MEX3B	-4.26733	1.51854e-267	9.48647e-266
ENSG00000183535	COL18A1-AS1	-1.78695	2.67499e-05	9.56016e-05
ENSG00000183558	HIST2H2AA3	4.30832	9.03118e-18	6.75931e-17
ENSG00000183688	FAM101B	-1.93005	1.5685e-119	4.89928e-118
ENSG00000183691	NOG	-2.5483	5.25541e-13	3.21618e-12
ENSG00000183783	KCTD8	-3.23198	0.00315821	0.00862036
ENSG00000183785	TUBA8	1.75057	0.000522648	0.00161179
ENSG00000183813	CCR4	6.47139	1.04018e-08	4.97865e-08
ENSG00000183831	ANKRD45	3.93551	1.01106e-10	5.49512e-10
ENSG00000183850	ZNF730	-2.18612	0.0130389	0.0317131
ENSG00000183929	DUSP5P1	2.36697	0.000287362	0.00091599
ENSG00000183941	HIST2H4A	4.68618	0.0142246	0.0342313
ENSG00000184305	CCSER1	-4.01602	0.0168097	0.0397833
ENSG00000184324	CSAG2	6.16561	0.000164213	0.00054083
ENSG00000184344	GDF3	-2.83366	0.012569	0.0306809
ENSG00000184371	CSF1	1.61597	0	0
ENSG00000184451	CCR10	2.18348	3.89324e-11	2.1572e-10
ENSG00000184530	C6orf58	6.01549	7.61074e-06	2.87247e-05
ENSG00000184571	PIWIL3	-3.20195	0.0135364	0.0327981
ENSG00000184611	KCNH7	-2.21943	0.0206379	0.0479304
ENSG00000184678	HIST2H2BE	3.04888	7.37641e-36	8.86769e-35
ENSG00000184702	SEPTIN5	-1.85533	1.05143e-49	1.62217e-48
ENSG00000184838	PRR16	5.40544	9.08454e-43	1.25231e-41
ENSG00000184908	CLCNKB	4.71979	0.0128736	0.0313429
ENSG00000184916	JAG2	-2.27543	0	0
ENSG00000184979	USP18	4.06664	0	0
ENSG00000184988	TMEM106A	2.36113	3.56008e-109	1.03988e-107
ENSG00000185013	NT5C1B	4.62565	0.0141957	0.0341768
ENSG00000185201	IFITM2	1.56179	8.26078e-271	5.25167e-269
ENSG00000185215	TNFAIP2	2.92567	0	0
ENSG00000185305	ARL15	-2.09568	1.05928e-52	1.70996e-51
ENSG00000185313	SCN10A	-2.33092	0.000531029	0.0016353
ENSG00000185338	SOCS1	6.01139	1.36487e-55	2.29944e-54
ENSG00000185361	TNFAIP8L1	-1.55817	3.32239e-129	1.10823e-127
ENSG00000185404	SP140L	1.53426	1.91708e-54	3.18752e-53
ENSG00000185436	IFNLR1	5.57545	0.000411244	0.00128677
ENSG00000185477	GPRIN3	-2.42699	4.74951e-18	3.58702e-17
ENSG00000185507	IRF7	3.91547	4.17527e-169	1.70602e-167
ENSG00000185527	PDE6G	-1.71835	0.0140448	0.0338664
ENSG00000185567	AHNAK2	-1.675	0	0
ENSG00000185614	FAM212A	-2.04769	4.11201e-58	7.11617e-57
ENSG00000185615	PDIA2	-2.0328	0.0193506	0.0451882
ENSG00000185630	PBX1	-1.70603	1.35601e-32	1.52419e-31
ENSG00000185634	SHC4	2.80082	0.00978619	0.0244287
ENSG00000185697	MYBL1	-1.97007	3.07374e-09	1.51722e-08
ENSG00000185722	ANKFY1	1.51262	0	0
ENSG00000185745	IFIT1	7.99992	0	0
ENSG00000185880	TRIM69	2.91234	0	0
ENSG00000185885	IFITM1	7.90871	0	0
ENSG00000185920	PTCH1	-2.12661	9.0369e-45	1.29018e-43
ENSG00000186088	GSAP	1.66157	5.39413e-37	6.65111e-36
ENSG00000186193	SAPCD2	-1.95635	7.14297e-24	6.57002e-23
ENSG00000186205	MARCHF1	-1.96762	2.22476e-09	1.10751e-08
ENSG00000186377	CYP4X1	-2.50184	1.67927e-26	1.65289e-25
ENSG00000186451	SPATA12	-2.85126	0.000761642	0.00229202
ENSG00000186470	BTN3A2	2.75979	5.01313e-54	8.29701e-53
ENSG00000186479	RGS7BP	-1.64688	3.61773e-29	3.75587e-28
ENSG00000186642	PDE2A	-2.04924	7.88604e-98	2.08637e-96
ENSG00000186767	SPIN4	-1.54806	2.8879e-12	1.70739e-11
ENSG00000187017	ESPN	-4.1501	1.19624e-14	7.90245e-14
ENSG00000187123	LYPD6	2.55494	1.24269e-11	7.07607e-11
ENSG00000187193	MT1X	1.61277	0.00158337	0.00454629
ENSG00000187243	MAGED4B	-2.22598	0.00346638	0.00938601
ENSG00000187260	WDR86	2.08084	0.000237264	0.000766013
ENSG00000187479	C11orf96	2.50998	1.46998e-42	2.01738e-41
ENSG00000187513	GJA4	-7.42559	9.3767e-87	2.26455e-85
ENSG00000187556	NANOS3	-3.05598	1.9552e-05	7.08257e-05
ENSG00000187583	PLEKHN1	3.01535	2.7318e-55	4.58801e-54
ENSG00000187608	ISG15	5.56928	0	0
ENSG00000187642	C1orf170	2.44392	9.61756e-08	4.296e-07
ENSG00000187678	SPRY4	-1.64903	1.57501e-176	6.67527e-175
ENSG00000187840	EIF4EBP1	-1.61565	3.45502e-94	8.976e-93
ENSG00000187942	LDLRAD2	-2.3021	8.47193e-36	1.01621e-34
ENSG00000187944	C2orf66	1.64508	9.85374e-06	3.67602e-05
ENSG00000187957	DNER	3.38436	3.25272e-66	6.31127e-65
ENSG00000187990	HIST1H2BG	4.42638	0.00568257	0.014773
ENSG00000188070	C11orf95	-1.72154	7.94105e-91	1.99125e-89
ENSG00000188112	C6orf132	3.04562	0.000137072	0.000455747
ENSG00000188282	RUFY4	7.18467	6.42767e-08	2.90901e-07
ENSG00000188313	PLSCR1	3.05038	0	0
ENSG00000188451	SRP72P2	-4.61878	0.0146844	0.0352161
ENSG00000188452	CERKL	-6.20335	1.61101e-05	5.89106e-05
ENSG00000188483	IER5L	-1.57597	1.27518e-15	8.75292e-15
ENSG00000188676	IDO2	3.62804	0.0126629	0.030889
ENSG00000188820	FAM26F	2.61967	2.58509e-05	9.25266e-05
ENSG00000188825	LINC00910	1.51641	0.000485379	0.001502
ENSG00000188833	ENTPD8	-2.70496	0.000669028	0.00202734
ENSG00000188938	FAM120AOS	-1.61416	2.53028e-51	3.98921e-50
ENSG00000188996	HUS1B	5.52946	0.000562826	0.00172756
ENSG00000189057	FAM111B	-1.51545	3.33727e-16	2.35274e-15
ENSG00000189060	H1F0	1.70643	0	0
ENSG00000189067	LITAF	1.55996	5.64757e-11	3.10538e-10
ENSG00000189157	FAM47E	4.83075	0.00174563	0.00497715
ENSG00000189410	SH2D5	2.79847	1.95351e-28	2.00309e-27
ENSG00000196074	SYCP2	-2.31646	0.00735	0.0187701
ENSG00000196083	IL1RAP	1.73923	3.29198e-52	5.26304e-51
ENSG00000196116	TDRD7	2.3198	5.41713e-293	3.71718e-291
ENSG00000196141	SPATS2L	1.50827	9.77831e-154	3.75414e-152
ENSG00000196154	S100A4	-3.00896	0.0034353	0.00931318
ENSG00000196159	FAT4	-1.5755	1.01479e-183	4.46734e-182
ENSG00000196169	KIF19	2.00843	6.85142e-58	1.18003e-56
ENSG00000196247	ZNF107	1.88222	4.12276e-50	6.38806e-49
ENSG00000196358	NTNG2	4.90683	1.77741e-09	8.89321e-09
ENSG00000196421	LINC00176	-3.45828	5.51899e-39	7.10077e-38
ENSG00000196503	ARL9	3.42774	1.09207e-10	5.92202e-10
ENSG00000196517	SLC6A9	2.37664	1.68321e-05	6.14259e-05
ENSG00000196569	LAMA2	-1.51062	1.1638e-16	8.31311e-16
ENSG00000196684	HSH2D	11.0365	1.68349e-20	1.38202e-19
ENSG00000196776	CD47	2.39634	0	0
ENSG00000196787	HIST1H2AG	2.65395	0.0073375	0.0187404
ENSG00000196878	LAMB3	2.78658	5.49052e-159	2.14219e-157
ENSG00000196950	SLC39A10	-2.19425	3.36854e-112	1.00291e-110
ENSG00000196960	RP11-192P3.5	-1.58982	7.06091e-08	3.18759e-07
ENSG00000197142	ACSL5	2.44842	3.96282e-166	1.59509e-164
ENSG00000197168	NEK5	3.68638	0.00133662	0.00388058
ENSG00000197208	SLC22A4	2.42723	4.43585e-194	2.04874e-192
ENSG00000197238	HIST1H4J	4.81265	0.00794762	0.0201771
ENSG00000197245	FAM110D	-2.9219	1.73e-15	1.18298e-14
ENSG00000197301	RP11-366L20.2	2.847	1.81297e-24	1.69203e-23
ENSG00000197380	DACT3	-2.73322	1.38765e-07	6.1125e-07
ENSG00000197381	ADARB1	-1.6679	1.90517e-176	8.05874e-175
ENSG00000197442	MAP3K5	1.77664	7.24352e-119	2.24632e-117
ENSG00000197445	C16orf47	4.40275	1.07648e-07	4.78473e-07
ENSG00000197463	CSAG3	5.30752	0.00139587	0.00403904
ENSG00000197479	PCDHB11	-2.27193	0.000606009	0.00185196
ENSG00000197536	C5orf56	2.37435	8.51164e-71	1.74388e-69
ENSG00000197558	SSPO	-2.27383	8.02398e-12	4.62502e-11
ENSG00000197632	SERPINB2	5.60193	0	0
ENSG00000197635	DPP4	2.48741	8.10661e-67	1.59006e-65
ENSG00000197646	PDCD1LG2	2.60738	0	0
ENSG00000197721	CR1L	7.11214	8.76155e-08	3.92418e-07
ENSG00000197872	FAM49A	-1.67328	7.81804e-110	2.29602e-108
ENSG00000197903	HIST1H2BK	2.54625	1.73493e-151	6.64904e-150
ENSG00000197914	HIST1H4K	4.78425	0.00297094	0.00814728
ENSG00000197927	C2orf27A	-1.92529	4.48405e-28	4.56107e-27
ENSG00000197959	DNM3	-1.86323	0.000164405	0.000541298
ENSG00000197971	MBP	-1.59289	2.271e-10	1.20401e-09
ENSG00000198075	SULT1C4	-3.21129	3.03296e-61	5.48598e-60
ENSG00000198133	TMEM229B	4.40794	8.52735e-60	1.51578e-58
ENSG00000198312	BMS1P9	-1.68791	0.0066297	0.0170596
ENSG00000198336	MYL4	-2.39624	1.62223e-05	5.93106e-05
ENSG00000198355	PIM3	-2.49289	0	0
ENSG00000198435	NRARP	-3.57282	0	0
ENSG00000198535	C2CD4A	1.56041	1.71424e-06	6.86682e-06
ENSG00000198576	ARC	-1.84553	0.00370924	0.0099922
ENSG00000198673	FAM19A2	1.72303	0.00511621	0.0134224
ENSG00000198691	ABCA4	-2.16489	6.35862e-24	5.86355e-23
ENSG00000198719	DLL1	1.67173	1.03691e-28	1.06881e-27
ENSG00000198771	RCSD1	-4.093	7.06326e-07	2.92981e-06
ENSG00000198774	RASSF9	-3.03568	2.00567e-13	1.25551e-12
ENSG00000198889	DCAF12L1	-2.34818	0.00120963	0.00353231
ENSG00000198930	CSAG1	6.35576	7.96619e-06	2.99877e-05
ENSG00000199846	RNU1-72P	4.47908	0.00457877	0.0121272
ENSG00000202533	Y_RNA	2.07398	9.1902e-05	0.000311211
ENSG00000203280	CTA-221G9.11	-2.26661	5.11578e-15	3.43196e-14
ENSG00000203446	AC004988.1	10.1434	1.45418e-17	1.08125e-16
ENSG00000203685	C1orf95	3.6189	0.00112201	0.00329155
ENSG00000203706	SERTAD4-AS1	-4.18593	1.96392e-21	1.6608e-20
ENSG00000203727	SAMD5	-2.22592	6.93145e-16	4.81283e-15
ENSG00000203797	DDO	2.85813	2.32964e-19	1.84383e-18
ENSG00000203812	HIST2H2AA4	6.00275	8.39587e-08	3.76899e-07
ENSG00000203813	HIST1H3H	2.09507	0.000578381	0.00177178
ENSG00000203814	HIST2H2BF	3.2603	0.0211068	0.048888
ENSG00000203865	ATP1A1OS	1.83364	0.0145326	0.034887
ENSG00000203883	SOX18	-4.8789	0	0
ENSG00000203943	SAMD13	-3.07003	1.99695e-07	8.67447e-07
ENSG00000204103	MAFB	-2.40124	7.08339e-09	3.42216e-08
ENSG00000204136	GGTA1P	-2.77597	0.00852467	0.0215157
ENSG00000204161	C10orf128	-1.94375	3.98718e-35	4.73533e-34
ENSG00000204176	SYT15	2.58407	4.20256e-21	3.52223e-20
ENSG00000204267	TAP2	2.26368	4.53195e-13	2.78449e-12
ENSG00000204278	TMEM235	-3.58698	0.0019749	0.00557787
ENSG00000204301	NOTCH4	-1.70579	3.19384e-11	1.77971e-10
ENSG00000204380	AC005042.4	-3.49976	5.2565e-05	0.00018255
ENSG00000204381	LAYN	-2.06079	1.96907e-07	8.5568e-07
ENSG00000204403	CASP12	-4.2244	2.38162e-40	3.13512e-39
ENSG00000204525	HLA-C	3.34145	7.75595e-48	1.16178e-46
ENSG00000204556	CTD-2514C3.1	-2.13887	0.0013739	0.00398187
ENSG00000204634	TBC1D8	-1.55182	1.08945e-243	6.19698e-242
ENSG00000204682	CASC10	-1.56035	6.44625e-06	2.44706e-05
ENSG00000204771	CTD-3232M19.2	2.58696	1.62193e-08	7.67804e-08
ENSG00000204876	AC021218.2	6.04731	8.23278e-06	3.09535e-05
ENSG00000204978	C19orf69	2.82303	0.01397	0.03372
ENSG00000204991	SPIRE2	1.91847	7.14015e-10	3.66068e-09
ENSG00000205045	SLFN12L	8.08313	1.09063e-14	7.21579e-14
ENSG00000205057	CLLU1OS	5.34443	0.000193214	0.000630293
ENSG00000205133	TRIQK	-3.04887	1.24699e-34	1.47128e-33
ENSG00000205220	PSMB10	2.03854	2.82681e-88	6.92761e-87
ENSG00000205269	TMEM170B	-1.89014	5.65995e-34	6.59159e-33
ENSG00000205300	RP11-352D3.2	6.70737	1.03105e-06	4.21527e-06
ENSG00000205309	NT5M	-1.74308	0.00104813	0.00309413
ENSG00000205323	SARNP	-1.9075	4.66618e-05	0.000163177
ENSG00000205364	MT1M	3.25008	1.34741e-17	1.0029e-16
ENSG00000205403	CFI	1.5836	4.53615e-133	1.55881e-131
ENSG00000205413	SAMD9	3.95012	0	0
ENSG00000205871	RPS3AP47	-1.86118	0.00436003	0.0115905
ENSG00000205978	NYNRIN	-1.9574	1.2779e-207	6.22114e-206
ENSG00000206113	RP11-503N18.1	4.01639	0.0180593	0.0424388
ENSG00000206190	ATP10A	10.3978	3.08794e-18	2.34607e-17
ENSG00000206337	HCP5	7.14621	5.71317e-07	2.39137e-06
ENSG00000206341	HLA-H	3.411	3.16567e-06	1.23758e-05
ENSG00000206417	H1FX-AS1	-2.64996	3.20472e-05	0.000113669
ENSG00000206503	HLA-A	3.47399	3.72713e-16	2.62075e-15
ENSG00000206612	SNORA2A	4.59946	0.0157211	0.0374282
ENSG00000207359	RNU6-925P	4.2351	0.0111296	0.0274118
ENSG00000211448	DIO2	2.71014	0.000162603	0.000535854
ENSG00000211772	TRBC2	-2.11548	4.43303e-25	4.19526e-24
ENSG00000212710	CTAGE1	4.68335	0.0119477	0.0292932
ENSG00000213062	AL021068.1	2.00533	0.00116221	0.00340028
ENSG00000213085	CCDC19	1.6945	1.5986e-05	5.84664e-05
ENSG00000213160	KLHL23	-3.42665	7.83919e-36	9.4188e-35
ENSG00000213222	AC093724.2	-3.1364	1.15504e-67	2.28627e-66
ENSG00000213244	HIST2H3DP1	2.79761	0.000121521	0.000406291
ENSG00000213494	CCL14	-5.23312	3.40121e-10	1.7818e-09
ENSG00000213500	LAP3P2	2.69081	3.66453e-09	1.80102e-08
ENSG00000213561	RP11-386I14.2	-3.01517	8.86219e-07	3.64938e-06
ENSG00000213626	LBH	-2.18903	0.00161647	0.00463457
ENSG00000213689	TREX1	2.18844	2.80993e-170	1.16131e-168
ENSG00000213707	HMGB1P10	-1.7665	0.00555884	0.0144817
ENSG00000213722	DDAH2	-1.54495	4.09942e-05	0.000144056
ENSG00000213730	POLD2P1	3.80535	0.00704905	0.0180549
ENSG00000213856	VDAC1P2	3.82991	0.0108978	0.0269066
ENSG00000213976	CTD-2561J22.2	-1.56327	0.0103016	0.0255942
ENSG00000214029	ZNF891	-1.59936	0.000410181	0.00128363
ENSG00000214050	FBXO16	4.83297	0.00889265	0.0223688
ENSG00000214121	TDPX2	4.85753	0.00687504	0.0176468
ENSG00000214189	ZNF788	5.33651	0.0011511	0.00337003
ENSG00000214212	C19orf38	3.85489	0.000251151	0.000806992
ENSG00000214282	KRT8P14	4.56863	0.0204777	0.0476131
ENSG00000214357	NEURL1B	-1.84595	0.00138272	0.00400369
ENSG00000214425	LRRC37A4P	-2.03236	0.00753507	0.0192064
ENSG00000214456	PLIN5	4.3083	6.02332e-06	2.29336e-05
ENSG00000214562	NUTM2D	1.50758	2.30587e-07	9.96232e-07
ENSG00000214719	AC005562.1	-2.35409	0.0173105	0.0408391
ENSG00000214783	POLR2J4	1.63881	0.00688553	0.0176654
ENSG00000214814	FER1L6	4.47774	5.00983e-52	7.97991e-51
ENSG00000214870	AC004540.5	-2.65444	2.70853e-21	2.28423e-20
ENSG00000214872	SMTNL1	5.80204	4.44963e-55	7.45571e-54
ENSG00000215009	ACSM4	2.20644	0.00809625	0.0205135
ENSG00000215156	RP11-1023L17.2	-2.04295	0.000412134	0.001289
ENSG00000215244	RP11-563J2.2	2.16433	0.0137513	0.033244
ENSG00000215306	AL135998.1	4.17958	1.84427e-05	6.70387e-05
ENSG00000215866	RP11-426L16.8	-1.75081	0.0104482	0.0259227
ENSG00000216197	AP001623.1	-2.58846	2.2612e-06	8.96968e-06
ENSG00000216490	IFI30	6.20514	2.45308e-05	8.80494e-05
ENSG00000218153	KRT18P22	5.42546	0.000846136	0.00253173
ENSG00000219992	RP11-420L9.2	-2.62345	0.00333157	0.00905581
ENSG00000220412	RP11-95M15.2	4.88932	7.3782e-05	0.000252581
ENSG00000220848	RPS18P9	-2.01482	0.003491	0.00944879
ENSG00000221866	PLXNA4	-3.3358	5.66797e-199	2.68081e-197
ENSG00000221869	CEBPD	5.12707	5.06709e-220	2.6265e-218
ENSG00000221890	NPTXR	-1.70952	0.00278295	0.00766775
ENSG00000221963	APOL6	4.4104	0	0
ENSG00000222000	AC092675.3	5.38037	7.91078e-06	2.97947e-05
ENSG00000222017	AC011997.1	5.90583	9.48406e-05	0.00032051
ENSG00000223177	RNA5SP39	2.49	0.0125256	0.0305853
ENSG00000223345	HIST2H2BA	2.12937	5.90482e-06	2.25022e-05
ENSG00000223387	RP11-408H1.3	4.51505	2.77026e-08	1.28828e-07
ENSG00000223401	RP11-211G3.2	1.91882	0.00354916	0.00959298
ENSG00000223656	HMGB3P10	-2.48596	0.0043306	0.0115151
ENSG00000223685	LINC00571	1.7818	0.0161646	0.0384166
ENSG00000223799	IL10RB-AS1	-1.50427	0.0140166	0.0338173
ENSG00000223802	CERS1	-2.62685	0.000620676	0.0018933
ENSG00000223901	AP001469.5	1.96631	0.0208219	0.0482903
ENSG00000224020	MIR181A2HG	-4.1006	0.0182883	0.0429255
ENSG00000224124	POM121L10P	-2.03845	0.00556748	0.0145024
ENSG00000224189	HOXD-AS1	-2.56688	1.40296e-18	1.0811e-17
ENSG00000224295	AC087380.14	1.65143	0.0161973	0.0384774
ENSG00000224321	RP11-169K16.6	5.47068	9.74992e-05	0.000329134
ENSG00000224358	RP11-466F5.8	4.16766	0.0153274	0.0366039
ENSG00000224367	OACYLP	-4.04076	0.00480949	0.0126885
ENSG00000224376	AC017104.6	-3.01894	0.0191972	0.0448786
ENSG00000224383	C17orf72	-1.56076	5.4322e-99	1.45498e-97
ENSG00000224460	RP11-439L18.2	3.9148	4.89643e-05	0.000170869
ENSG00000224546	EIF4BP3	-1.58779	2.18092e-08	1.02302e-07
ENSG00000224559	LINC01087	-4.30477	0.00847483	0.0213999
ENSG00000224596	ZMIZ1-AS1	2.95092	4.79038e-12	2.7932e-11
ENSG00000224715	CITF22-49D8.1	3.97174	4.91242e-05	0.000171359
ENSG00000224743	TEX26-AS1	-4.9351	0.000872153	0.00260489
ENSG00000224843	LINC00240	3.64035	2.12357e-07	9.20969e-07
ENSG00000224959	AC017002.2	-2.39809	0.00126398	0.00368107
ENSG00000224963	U82695.9	-5.97968	5.33256e-05	0.000185073
ENSG00000225075	RP11-426L16.3	2.21941	0.00263572	0.00728251
ENSG00000225101	OR52K3P	7.64876	2.72412e-09	1.34957e-08
ENSG00000225119	LINC00999	1.62287	7.38439e-05	0.000252713
ENSG00000225131	PSME2P2	3.64764	0.00216034	0.00606265
ENSG00000225205	AC093818.1	-1.97765	1.05911e-05	3.93888e-05
ENSG00000225265	RP11-378J18.3	3.42892	0.0160195	0.0380877
ENSG00000225472	RP11-120J1.1	2.98148	0.000347645	0.00109554
ENSG00000225492	GBP1P1	9.48138	1.72765e-29	1.80141e-28
ENSG00000225518	RP11-396C23.2	3.92878	0.00433529	0.0115261
ENSG00000225541	AC002480.5	5.03665	0.00446829	0.0118564
ENSG00000225554	RP11-527D7.1	1.55363	0.0122212	0.029923
ENSG00000225792	AC004540.4	-3.77639	3.27723e-07	1.39857e-06
ENSG00000225886	RP11-288L9.4	6.45167	5.36726e-73	1.11982e-71
ENSG00000225963	AC009950.2	3.23046	2.8888e-27	2.8868e-26
ENSG00000225964	AC017076.5	9.29257	8.09129e-15	5.38299e-14
ENSG00000225968	ELFN1	-2.83276	2.4739e-05	8.87671e-05
ENSG00000226007	RP11-211N8.2	-3.06955	0.00227897	0.00636872
ENSG00000226025	LGALS17A	8.47812	7.51505e-12	4.33514e-11
ENSG00000226051	ZNF503-AS1	4.20473	1.2373e-05	4.57637e-05
ENSG00000226149	RP1-69D17.4	-2.1939	0.0127589	0.0310987
ENSG00000226202	RP11-328D5.1	-3.35443	0.00135943	0.00394259
ENSG00000226239	RP1-310O13.7	-4.78851	3.16293e-08	1.46521e-07
ENSG00000226298	RAD23BLP	4.4125	0.00558237	0.0145377
ENSG00000226334	RP11-217B7.2	5.13404	0.00355032	0.00959491
ENSG00000226363	AC009336.24	-3.94682	3.88597e-17	2.83576e-16
ENSG00000226380	MIR29A	2.34067	7.58659e-24	6.96323e-23
ENSG00000226471	CTA-292E10.6	2.0344	0.0155927	0.0371513
ENSG00000226496	LINC00323	-1.56191	4.45844e-06	1.7175e-05
ENSG00000226562	CYP4F26P	-2.03658	0.0139873	0.033754
ENSG00000226751	AF127936.5	5.28532	0.00147587	0.00425686
ENSG00000226810	RP11-45H22.1	-4.98952	0.00591945	0.0153453
ENSG00000226950	DANCR	-2.28009	3.06048e-57	5.23771e-56
ENSG00000227017	AC007036.6	4.723	0.0202557	0.0471542
ENSG00000227051	C14orf132	-4.80672	2.29526e-06	9.09478e-06
ENSG00000227071	RP11-4E23.2	-2.78522	0.017208	0.0406193
ENSG00000227167	RP11-570H19.2	5.72388	0.000259378	0.000831817
ENSG00000227467	RP11-169D4.1	-2.7099	0.000492782	0.00152382
ENSG00000227517	AC003051.1	1.57986	2.56965e-05	9.20042e-05
ENSG00000227695	DNMBP-AS1	1.79116	0.0205151	0.0476857
ENSG00000227706	RP11-301G19.1	2.57371	4.22673e-06	1.63261e-05
ENSG00000227921	AL353791.1	-1.51673	3.91822e-08	1.80158e-07
ENSG00000227986	TRIM60P18	-3.51658	0.00521472	0.0136559
ENSG00000228109	MFI2-AS1	1.98225	0.0145234	0.0348726
ENSG00000228243	RP11-436G20.1	-3.09495	0.004448	0.0118069
ENSG00000228318	AP001610.5	5.66737	3.19319e-20	2.59328e-19
ENSG00000228343	RP11-1148L6.5	-1.54844	2.87192e-13	1.78689e-12
ENSG00000228360	RP11-365F18.1	4.91762	0.0061702	0.0159475
ENSG00000228536	RP11-392O17.1	3.9487	1.31742e-07	5.81143e-07
ENSG00000228742	RP5-884M6.1	2.49075	2.09884e-35	2.50091e-34
ENSG00000228763	AC010095.5	-2.03652	0.00518246	0.0135731
ENSG00000228991	RP11-318K12.1	2.25401	9.26725e-07	3.80603e-06
ENSG00000228998	RP11-697E2.7	-1.50622	6.22819e-09	3.01776e-08
ENSG00000229020	AKR7A2P1	1.82777	0.0108578	0.0268281
ENSG00000229023	AC067945.3	5.02914	0.0038814	0.0104206
ENSG00000229474	PATL2	2.45442	6.34482e-06	2.41194e-05
ENSG00000229489	ATP5A1P5	5.68754	3.61944e-05	0.000127771
ENSG00000229598	PRDX3P1	2.53051	3.66203e-05	0.000129232
ENSG00000229644	NAMPTL	2.4615	0	0
ENSG00000229645	LINC00341	-1.94367	7.5048e-39	9.60428e-38
ENSG00000229647	AC007879.7	4.92072	0.00107397	0.0031625
ENSG00000229656	RP11-462L8.1	2.03469	8.0335e-05	0.000273671
ENSG00000229677	RP11-383F6.1	5.9378	1.21139e-05	4.48436e-05
ENSG00000229782	AC118754.4	-3.73178	0.0010801	0.00317896
ENSG00000229808	RP11-456P18.2	2.21886	0.00950823	0.0237926
ENSG00000229873	OGFR-AS1	2.37997	3.38925e-06	1.32069e-05
ENSG00000229921	KIF25-AS1	5.93249	7.40546e-05	0.000253314
ENSG00000229932	YWHAZP3	-1.75459	0.000419641	0.00130945
ENSG00000229939	RP11-111F16.2	-2.21038	2.74472e-08	1.27722e-07
ENSG00000230024	RP11-95P13.1	5.98976	1.16073e-10	6.27859e-10
ENSG00000230042	AK3P3	-4.09323	0.0141389	0.0340666
ENSG00000230149	RP3-508I15.19	2.56239	1.20993e-06	4.91406e-06
ENSG00000230183	CNOT6LP1	1.58224	0.000409223	0.00128101
ENSG00000230195	AC118138.2	1.88549	0.00262981	0.00726712
ENSG00000230204	FTH1P5	5.38324	0.000961526	0.00285565
ENSG00000230225	MTND5P14	5.19668	0.00217271	0.00609515
ENSG00000230325	RP11-385F5.4	1.63808	0.010249	0.0254723
ENSG00000230501	ANKRD30BP3	-1.58847	0.0101482	0.0252508
ENSG00000230630	DNM3OS	3.6358	0.0125109	0.0305529
ENSG00000230633	RP11-37E23.5	-3.13592	0.00180733	0.00514425
ENSG00000230661	YY1P1	-5.10038	0.000624071	0.00190285
ENSG00000230790	AC012456.4	4.26321	0.0110845	0.0273164
ENSG00000230805	AL132709.1	-5.40126	0.000153706	0.000507928
ENSG00000230812	RP4-794H19.4	2.12601	0.000649454	0.00197467
ENSG00000230882	AC005077.14	2.82189	0.0101102	0.0251678
ENSG00000231133	HAR1B	4.63973	0.0132804	0.0322353
ENSG00000231172	AC007099.1	-3.00311	0.00183603	0.00521908
ENSG00000231187	RP11-38L15.3	2.50755	1.9035e-07	8.28349e-07
ENSG00000231233	CCDC147-AS1	1.58676	0.00540601	0.0141158
ENSG00000231252	RP11-436K8.1	-4.97597	0.000947526	0.002816
ENSG00000231290	APCDD1L-AS1	2.17864	6.91924e-08	3.12755e-07
ENSG00000231441	RP11-472M19.2	4.05179	0.0166155	0.0393538
ENSG00000231535	LINC00278	3.13086	0.00201712	0.00568671
ENSG00000231574	RP11-91K9.1	7.53746	1.06807e-09	5.42188e-09
ENSG00000231632	RP11-82L18.4	-2.93329	8.61979e-05	0.000292353
ENSG00000231925	TAPBP	2.16673	0.00092774	0.00276138
ENSG00000232022	RP5-1109J22.1	6.28405	1.37948e-05	5.08136e-05
ENSG00000232037	RP11-26H16.1	-2.70032	0.0141014	0.0339839
ENSG00000232125	DYTN	-5.76572	0.000150209	0.000497056
ENSG00000232133	IMPDH1P10	2.08398	0.00357149	0.00964611
ENSG00000232187	FTH1P7	1.5327	2.23821e-11	1.25725e-10
ENSG00000232229	LINC00865	3.27902	0.000942233	0.00280104
ENSG00000232517	AC112198.1	-5.4685	2.69862e-58	4.6852e-57
ENSG00000232618	RP11-439L18.1	6.2479	1.84483e-05	6.70387e-05
ENSG00000232692	AP001596.6	-4.98327	0.00427029	0.0113659
ENSG00000232702	RP3-437C15.1	3.18854	0.00301443	0.00825504
ENSG00000232713	AC010733.5	1.55845	0.0156742	0.0373249
ENSG00000232759	AC002480.3	2.0267	3.68389e-15	2.49069e-14
ENSG00000232803	RP11-93B14.5	6.08979	3.34798e-05	0.000118614
ENSG00000232949	AC002480.4	1.84792	1.26252e-05	4.66723e-05
ENSG00000233029	RP11-439A17.9	4.96563	0.00492064	0.0129502
ENSG00000233058	LINC00884	2.53159	3.19703e-09	1.57663e-08
ENSG00000233170	RP11-863K10.4	1.7695	0.000417464	0.00130378
ENSG00000233351	RP1-69D17.3	-5.3428	0.00171996	0.00491368
ENSG00000233370	AC092664.1	-2.95739	0.00189634	0.00537285
ENSG00000233578	RP5-1022P6.3	-4.96819	0.00727612	0.018599
ENSG00000233695	GAS6-AS1	-2.20476	1.19721e-06	4.86516e-06
ENSG00000233718	MYCNOS	-4.97573	0.00106248	0.00313094
ENSG00000233766	AC098617.1	2.50876	0.000487308	0.00150754
ENSG00000233785	RP13-314C10.5	5.08991	0.000577851	0.00177041
ENSG00000233975	RP11-288L9.1	6.01201	5.23283e-05	0.000181845
ENSG00000234076	TPRG1-AS1	5.37048	0.00104899	0.00309541
ENSG00000234117	RP11-259P20.1	4.53113	0.0183487	0.0430533
ENSG00000234155	RP11-30P6.6	1.73337	0.000310956	0.000986252
ENSG00000234199	AC010982.1	4.89828	0.00658515	0.016951
ENSG00000234290	AC116366.6	2.12839	4.44163e-25	4.20156e-24
ENSG00000234459	AC002064.4	2.46086	0.00852755	0.021518
ENSG00000234465	PINLYP	2.59086	8.3084e-25	7.81489e-24
ENSG00000234562	TPMTP2	-4.80741	0.0097184	0.0242727
ENSG00000234617	SNRK-AS1	1.58731	0.012871	0.0313401
ENSG00000234648	AL162151.3	-1.64412	0.000368544	0.00115887
ENSG00000234745	HLA-B	3.8304	0.00791299	0.0200963
ENSG00000234750	CTD-2666L21.2	1.50474	0.00428045	0.0113901
ENSG00000234964	FABP5P7	-2.79543	2.47074e-90	6.16688e-89
ENSG00000235215	RP11-145M4.2	4.87118	0.00674701	0.0173326
ENSG00000235370	DNM1P51	-2.48515	0.00256624	0.00711237
ENSG00000235385	GS1-600G8.5	3.12996	1.03571e-30	1.10881e-29
ENSG00000235505	RP11-693N9.2	-2.85258	2.81935e-293	1.94078e-291
ENSG00000235513	RP4-756G23.5	3.0129	2.81204e-12	1.66344e-11
ENSG00000235531	RP11-383H13.1	5.10683	0.0028604	0.00786811
ENSG00000235750	KIAA0040	-1.71011	3.54379e-123	1.12646e-121
ENSG00000235763	SNRPGP5	3.52885	0.0181545	0.042644
ENSG00000235770	LINC00607	-1.88872	2.73314e-301	1.92433e-299
ENSG00000235831	BHLHE40-AS1	-2.49289	0.014184	0.0341525
ENSG00000235910	APOA1-AS	3.26006	0.0108406	0.0267977
ENSG00000235919	ASH1L-AS1	2.35961	2.99312e-05	0.000106548
ENSG00000235999	RP11-403I13.8	1.87883	6.37464e-06	2.42158e-05
ENSG00000236098	RP11-148B18.4	2.23804	7.17426e-10	3.67642e-09
ENSG00000236254	MTND4P14	5.0272	0.00390897	0.0104855
ENSG00000236256	DIAPH2-AS1	2.49108	0.000300776	0.000955507
ENSG00000236337	FMR1-IT1	1.73459	0.0161674	0.0384188
ENSG00000236345	RP11-59D5__B.2	1.71161	0.00366857	0.00988976
ENSG00000236383	LINC00854	1.83813	3.08133e-17	2.25926e-16
ENSG00000236393	RP11-320G24.1	2.98261	1.50434e-07	6.60497e-07
ENSG00000236452	AC123023.1	3.1551	4.38063e-08	2.00651e-07
ENSG00000236453	AC003092.1	4.47119	0.0051025	0.013388
ENSG00000236526	RP4-742J24.2	-1.89888	0.0209576	0.0485895
ENSG00000236567	RP11-39K24.7	2.63273	0.00311833	0.00852119
ENSG00000236719	OVAAL	-4.90088	0.00553141	0.0144189
ENSG00000236829	Z97634.3	-1.51774	0.00287794	0.00790929
ENSG00000236830	CBR3-AS1	2.31808	0.00542921	0.0141713
ENSG00000236841	AC007750.5	6.71061	1.14552e-06	4.66739e-06
ENSG00000236849	RP11-151D14.1	-2.50694	0.0128401	0.0312755
ENSG00000236972	FABP5P1	-4.0209	0.0165408	0.0392028
ENSG00000237073	RP11-168K11.2	-1.61875	0.00205794	0.00579272
ENSG00000237234	RP1-142L7.5	-1.58634	2.86034e-14	1.86055e-13
ENSG00000237248	LINC00987	-3.10869	0.00505165	0.0132723
ENSG00000237276	ANO7P1	4.21263	3.80126e-73	7.94625e-72
ENSG00000237352	RP11-145M4.3	3.71938	0.0102042	0.0253698
ENSG00000237371	RP13-152O15.5	-1.53397	0.00494268	0.0130018
ENSG00000237379	CBX1P3	7.03364	1.59123e-07	6.96949e-07
ENSG00000237451	CDK2AP2P2	-3.92574	0.00510105	0.0133858
ENSG00000237499	RP11-356I2.4	2.40869	6.80035e-05	0.000233651
ENSG00000237525	AC012668.2	-1.56772	1.80722e-07	7.88991e-07
ENSG00000237596	RP13-143G15.4	2.33278	0.00760939	0.0193776
ENSG00000237649	KIFC1	-3.59121	1.00449e-07	4.47763e-07
ENSG00000237685	RP11-360O19.4	5.37058	0.00166612	0.00476997
ENSG00000237797	RP11-472N13.3	-5.66886	0.000364731	0.00114738
ENSG00000237803	LINC00211	3.07843	1.24079e-07	5.4846e-07
ENSG00000237928	RP4-668G5.1	-5.331	9.87034e-06	3.68158e-05
ENSG00000237980	RP11-338C15.3	5.56481	9.40158e-05	0.000317822
ENSG00000238000	RP11-274E7.2	2.15903	0.00354176	0.00957537
ENSG00000238015	RP4-641G12.3	5.36212	0.000193097	0.000630006
ENSG00000238025	ZDHHC4P1	6.79444	9.05139e-07	3.72375e-06
ENSG00000238033	AC002480.2	5.32632	0.0022761	0.00636208
ENSG00000238045	AC009133.14	1.79592	8.35654e-06	3.14079e-05
[truncated: 317 more rows]

## Sheet: Sheet4
DEGs between human ECs with Thrombinn treatment and Control ECs
[truncated: 621 more rows]

[truncated: 1 more sheets: Sheet5]
