# Supplementary material for: A single-cell transcriptomic atlas of the lungs of patients with pulmonary tuberculosis
Source: Research Square preprint supplement (doi:10.21203/rs.3.rs-2752256/v1), 2024-03-18
Supplement: Supplementary file 3 [file 53e42967d923654551ce71df.xlsx]

## Sheet: Table S6
Supplementary Table 6. Primers used in this study.
Primer name	Sequences
IL6-Forward	ACTCACCTCTTCAGAACGAATTG
IL6-Reverse	CCATCTTTGGAAGGTTCAGGTTG
IL8-Forward	ACTGAGAGTGATTGAGAGTGGAC
IL8-Reverse	AACCCTCTGCACCCAGTTTTC
IL1A-Forward	CTCTCTCCTTTCAGGGCCAA
IL1A-Reverse	GAGAGGCCTGGCTCAACAAA
IL1B-Forward	CTCTCTCCTTTCAGGGCCAA
IL1B-Reverse	GAGAGGCCTGGCTCAACAAA
IFNa-F	TTGATGGCAACCAGTTCCAG
IFNa-R	TCATCCCAAGCAGCAGATGA
IFNb-F	ACGCCGCATTGACCATCTAT
IFNb-R	GTCTCATTCCAGCCAGTGCT
CCL2-Forward	AGCTCGCACTCTCGCCTCCAG
CCL2-Reverse	GGCATTGATTGCATCTGGCTGAGC
CCL20-Forward	GGCGAATCAGAAGCAGCAAGCAAC
CCL20-Reverse	ATTGGCCAGCTGCCGTGTGAA
ISG56-Forward	ATCCTGGGATTTTGGGGCTT
ISG56-Reverse	CCGCTTGTCGCTGGTGTCG
ICAM1-Forward	GGTAGCAGCCGCAGTCATAATGG
ICAM1-Reverse	GTGGCTTGTGTGTTCGGTTTCATG
VCAM1-Forward	TCTCATTGACTTGCAGCACCACAG
VCAM1-Reverse	CCTCATTCGTCACCTTCCCATTCAG
18s rRNA-Forward	GTAACCCGTTGAACCCCATT
18s rRNA-Reverse	CCATCCAATCGGTAGTAGCG
