# Supplementary material for: A single-cell transcriptomic atlas of the lungs of patients with pulmonary tuberculosis
Source: Research Square preprint supplement (doi:10.21203/rs.3.rs-2752256/v1), 2024-03-18
Supplement: Supplementary file 4 [file 65ffa11082b129a0ebf4caf0.xlsx]

## Sheet: Table S5
Supplementary Table 5. List of genes in different database or pathways used in this study.
Lung fibrosis (WP3624)	Signaling by Interleukins (R-HSA-449147)	Cellular senescence (hsa04218)	Senescence Associated Secretory Phenotype (SASP)	Exhaustion markers	Thromboinfammatony	MAVS	cGAS-Sting	Apoptosis (hsa04210)	Pyroptosis(GO:0070269)	NF-kappa B signaling pathway (hsa04064)	Chemokine signaling pathway (hsa04062)	Positive regulation of cell death (GO:0010942)	Cholesterol metabolism (hsa04979)	Fatty acid biosynthesis (hsa00061)	Fatty acid degradation (hsa00071)	Aging genes from Aging Atlas	Chronic interstitial lung disease	Idiopathic pulmonary fibrosis	Pneumonia	Pulmonary emphysema	Pulmonary fibrosis	Pulmonary hypertension	Chronic obstructive pulmonary disease
ATP11A	IL12B	TGFB1	ANG	LAG3	F2	RIGI	CGAS	TNFSF10	IFI27	LCK	CXCL1	MAP3K20	ABCA1	ACACA	ACAT2	IL2RB	ABCA3	SFTPA2	IL1B	SERPINA1	TGFB1	NPPB	PDE4A
BMP7	IL6	TGFB2	AREG	TIGIT	NR1I2	IFIH1	STING1	TNFRSF10A	NINJ1	ZAP70	CXCL2	PNMA2	APOA1	ACACB	ACAT1	PSAT1	SMUG1	MUC5B	CXCL1	MMP9	CCN2	SLC6A4	MAFD2
CALCA	CCL3L1	TGFB3	AXL	PDCD1	EGR1	MAVS	IFI16	TNFRSF10B	CASP3	LAT	CXCL3	NQO1	LPL	ACSF3	ACAA1	A2M	SFTPC	DSP	CCL2	ELN	NFE2L2	EDN1	CD46
CCL11	CCL4	TGFBR1	BMP2	CTLA4	PDGFB	IRF3	STIM1	FASLG	TRIM2	PLCG1	CXCL5	FOXP1	LCAT	MCAT	ACAA2	AARS1		RTEL1	CCL11	MMP12	IL1B	ACVRL1	MRC1
CCL2	CSF3	TGFBR2	BMP6	HAVCR2	PDGFRA		SEC24B	FAS	ZEB2	PRKCQ	CXCL6	GADD45G	LIPG	FASN	HADHB	ABL1		SFTPC	IKBKB	TNF	EDN1	NOS3	NFE2L2
CCL3	CXCL2	SMAD2	CCL1	TOX	PDGFRB		SEC23B	FADD	MAP3K20	IGH	PPBP	SPDEF	PLTP	OXSM	HADH	ADCY1		TERT	IL18	EPHX1	MMP9	ALOX5	ADCY2
CCL4	CCL2	SMAD3	CCL13		MAPK1		STEEP1	TNF	CASP6	SYK	CXCL8	TP63	CETP	CBR4	HADHA	ADCY2		TERC	ITGB2	TGFB1	CCL2	CCL2	SERPINA1
CCL5	CCL19	CDKN2B	CCL2		MAPK11		ERGIC1	TNFRSF1A	PYCARD	LYN	CXCL9	MT3	LIPC	HSD17B8	EHHADH	ADCY3		SFTPA1	CCL17	MMP2	IL4	KCNA5	PIGR
CCN2	CCL20	CDK4	CCL20		MAPK12		TBK1	TRADD	DPP9	BLNK	CXCL10	TFAP2A	LPA	HTD2	ECHS1	ADCY4		PARN	IFNG	ITGB6	IL13	HIF1A	HHIP
CCR2	TNF	CDK6	CCL25		MAP2K2		IRF3	CFLAR	NLRP3	BTK	CXCL11	UTP11	CD36	MECR	ACOX3	ADCY5		FAM13A	IL6	HMOX1	TIMP1	EDNRB	SCGB1A1
CCR3	CCL3	CCND1	CCL26		PIK3CB		NFKB1	CASP8	MEFV	PLCG2	CXCL12	NLRP2B	LDLR	OLAH	ACOX1	ADCY6		DPP9	IL13	AGER	AGT	CD40LG	IREB2
CEBPB	CSF2	CCND2	CCL3		PIK3R6			CASP10	NLRP6	PRKCB	CXCL13	ZBP1	NCEH1	ACSL6	ACADS	ADCY7		ATP11A	IL17A	CYP2A6	CSF2	NFATC2	IL5RA
CMA1	CXCL1	CCND3	CCL7		PIK3R2			CASP6	TREM2	CARD10	CXCL16	AXIN2	SOAT2	ACSL4	ACADM	ADCY8		STN1	MYD88	TGFBR1	HPS1	BMPR2	FAS
CSF2	CCL22	RB1	CD55		PIK3CG			CASP3	CARD8	CARD11	PF4	ACER2	SOAT1	ACSL1	ACADL	ADCY9		STAT3	TLR4	TGFB2	FAM13A	ACE	CHIT1
CSF3	CCL5	RBL1	CD9		PIK3CD			CASP7	NLRP1	CARD14	PF4V1	VNN1	APOC1	ACSL5	ACADSB	ADH1B		WNT5A	TNF	TGFB3	DSP	TGFA	CHRNA3
CXCL2	CXCL10	RBL2	CSF1		AKT1			BID	GZMB	BCL10	CXCL14	PNMA1	APOC2	ACSL3	ACADVL	ADH5		PLAU	IL33	TGFBR2	ABCA3	FOXO1	EPHX1
CXCL8	IL1A	E2F1	CSF2		IKBKG			BAX	CASP8	MALT1	XCL1	CCL3	APOH	ACSBG1	GCDH	ADIPOQ		MMP3	TGFB1	SMAD3	AP3B1	KCNK3	GABPA
CYSLTR2	IL8	E2F2	CSF2RB		IKBKB			BAK1	CASP4	IL1B	XCL2	CD40	ANGPTL3	ACSBG2	ACSL6	ADIPOR1		ABCA3	HMOX1	BICD1	FN1	GBA	MSTN
DPP9	IL18	E2F3	CSF3		NFKB1			DIABLO	ZBP1	IL1R1	CX3CL1	RRP1B	ANGPTL4		ACSL4	ADIPOR2		HIF1A	IL4	SNRPF	TNF	GDF2	LAMA1
DSP	IL1B	E2F4	CXCL1		NFKB2			SEPTIN4	NAIP	MYD88	CCL1	MELK	ANGPTL8		ACSL1	AGPAT2		ESR1	CSF2	PPT2	HGF	MIR204	GSTM1
EDN1	LIF	E2F5	CXCL11		REL			HTRA2	GZMA	IRAK1	CCL2	ZC3H12A	SCARB1		ACSL5	AGTR1		GPER1	SIRT1	IL6	IL6	LOX	GSTM2
EGF	IL12A	PIK3CA	CXCL12		RELA			CYCS	ARRDC1-AS1	IRAK4	CCL3	SFRP2	SORT1		ACSL3	AIFM1		TNF	CXCL5	ELANE	HMGB1	LEPR	GZMA
ELMOD2	PTGS2	PIK3CD	CXCL2		RELB			APAF1	GSDMC	TRAF6	CCL3L1	PSEN1	APOB		ACSBG1	AKT1		CCL2	PARP1	GABPA	TGFA	ARG2	IL33
ELN	CSF1	PIK3CB	CXCL3		RHOA			CASP9	GSDMA	TNF	CCL3L3	BECN1	PCSK9		ACSBG2	AKT1S1		FOSL2	CCL24	NFE2L2	STAT3	EIF2AK4
FAM13A	FCER2	PIK3R1	CXCL5		MEK1			PRF1	GSDMB	TNFRSF1A	CCL4	NR4A1	LDLRAP1		CPT1A	AKT2		TOLLIP	AHR	COPD	IGF1	KCNMA1
FGF1	CD80	PIK3R2	CXCL6		ICAM1			GZMB	NLRC4	RIPK1	CCL4L2	IL6	MYLIP		CPT1B	AKT3		SLC27A5	CXCR2	PPT2-EGFL8	FGF2	CXCL8
FGF2	IL1R2	PIK3R3	CXCL8		THBD			TUBA1B	APIP	TRADD	CCL4L1	ITM2C	APOE		CPT1C	ALDH2		TGFB1	AGT	VEGFA	CXCL8	HTR2B
FGF7	ICAM1	FOXO1	EGFR					TUBA4A	NLRP9	TRAF2	CCL5	TNFRSF12A	LRP1		CPT2	ALDH9A1		MMRN1	IL6ST	MMP1	MTOR	ATP7A
GREM1	CD86	FOXO3	EREG					TUBA3C	DHX9	TRAF5	CCL7	HPGD	LRP2		ECI1	APEX1		CEL	MYLK	SFTPD	AREG	PRKG1
HGF	IL1R1	CDKN1A	ETS2					TUBA1A	GSDMD	BIRC2	CCL8	PYCARD	LRPAP1		ECI2	APOC3		POSTN	SPP1	IFNG	SERPINA1	SOD2
HMOX1	TIMP1	CDK2	FAS					TUBA1C	CASP1	BIRC3	CCL11	USP17L24	LIPA		CYP2U1	APOE		TTYH1	TNFRSF1A	IL1B	MMP2	TNF
IGF1	TNFRSF1A	CCNE1	FGF2					TUBA8	GSDME	EDA	CCL13	UNC5C	STARD3		ADH1A	APP		ACTB	CASP1	IL13	SPP1	SLC31A1
IL12B	CCR5	CCNE2	FGF7					TUBA3E	AIM2	EDAR	CCL14	NOX1	VDAC1		ADH1B	APPL1		CFTR	CD40LG	SERPINA13P	SOD1	CA9
IL13	FPR1	HLA-A	GDF15					TUBA3D		EDARADD	CCL15	CD36	VDAC2		ADH1C	APTX		CAV1	EGR1	IL17A	CCR2	CALCA
IL1B	IL1RN	HLA-B	GEM					TUBAL3		CYLD	CCL23	E2F3	VDAC3		ADH7	AR		PARP9	CXCR3	SERPING1	CCL11	CBLN2
IL4	TNFRSF1B	HLA-C	GMFG					MCL1		EDA2R	CCL16	FOS	TSPO		ADH4	AREG		IL6	PF4	CFTR	FGF1	TPH1
IL5	PTAFR	HLA-F	HGF					ACTG1		DDX58	CCL17	HEBP2	CYP27A1		ADH5	ARHGAP1		MAPT-AS1	POMC	EGFR	STAT6	BRD4
IL6	CCR2	HLA-G	ICAM1					ACTB		TRIM25	CCL18	GSN	VAPA		ADH6	ARNTL		RTEL1-TNFRSF6B	CCL8	CXCL8	MIR326	FBLN5
MECP2	CCR1	HLA-E	ICAM3					SPTA1		LBP	CCL19	PHLDA2	VAPB		ALDH2	ATF2		AGER	CCL19	KDR	CCL5	ABCA3
MMP2	BRWD1	KIR2DL4	IGF1					SPTAN1		CD14	CCL20	S100A9	NPC1		ALDH3A2	ATF4		CXCL8	TNFRSF1B	SIRT1	SOD3	CCL1
MMP9	CISH	KRAS	IGF2R					LMNA		TLR4	CCL21	PRKCI	OSBPL5		ALDH1B1	ATF6B		TP53	CCR2	PGF	EGF	NOS2
MT2A	SOCS1	NRAS	IGFBP1					LMNB1		LY96	CCL22	PICALM	NPC2		ALDH7A1	ATG101		IL1B	CCR9	PLF	BMP7	CCN2
MUC5B	SOCS2	RRAS	IGFBP2					LMNB2		TIRAP	CCL24	SMAD4	STAR		ALDH9A1	ATG13		VEGFA	CCR1	TP53	ELN	AGT
NFE2L2	SOCS3	RRAS2	IGFBP6					PARP1		TICAM2	CCL25	CD274	CYP7A1			ATG5		IFNG	CCR6	FEV	FGF7	ANGPT1
PARN	SOCS3	MRAS	IL13					PARP2		TICAM1	CCL26	PPID	ABCB11			ATM		PTGS2	ABCF1	CASP3	COL3A1	TNC
PDGFA	IRF4	HRAS	IL15					PARP3		CD40LG	CCL27	WWOX	ABCG5			ATP5O		CCN2	IL1R1	FUT8	MIR30A	UTS2
PDGFB	VIM	AKT1	IL1A					PARP4		CD40	CCL28	RPL26	ABCG8			ATR		FN1	IL2RB	HIF1A	MIR29C	PTGS2
PLAU	FSCN1	AKT2	IL1B					DFFA		TRAF3	CXCR2	CAV1	APOA2			AXL		PIK3CB	IL5RA	HDAC2	CAT	NPPA
PTX3	STAT1	AKT3	IL6					DFFB		TNFSF11	CXCR1	RAPSN	APOC3			BAK1		PIK3CA	CXCL9	TLR4	ADIPOQ	SMAD7
RTEL1	CDKN1A	TSC1	IL6ST					ENDOG		TNFRSF11A	CXCR3	PRKDC	APOA4			BAX		PIK3CG	CCL4	GSTM1	CEBPB	VIP
SERPINA1	RHOU	TSC2	IL7					AIFM1		LTA	CXCR4	MMP9				BCL10		RGS6	CCL7	FBN1	MECP2	ATP2A2
SFTPA1	NOS2	RHEB	INHA					ERN1		LTB	CXCR5	PTPRC				BCL2		RASA1	CCL20	EGR1	HMOX1	MMP9
SFTPA2	AKT1	MTOR	INHBA					TRAF2		TNFSF14	CXCR6	RHOA				BCL2A1		CXCR4	CX3CL1	CHRNA3	GREM1	SMAD9
SFTPC	MCL1	PTEN	IQGAP1					ITPR1		LTBR	XCR1	TCTN3				BCL2L1		PIK3CD	IL1R2	SERPINA3	CSF3	MMP1
SKIL	PIK3R1	SIRT1	ITGA2					ITPR2		MAP3K14	CX3CR1	CALHM2				BDNF		SMN1	IL1A	LOX	CCR3	CASR
SMAD7	HSP90AA1	CCNA2	ITPKA					ITPR3		MAP3K7	CCR8	ZNF746				BIRC2		IL13	ICAM1	CDKN2A	SMAD7	MYC
SPP1	CD36	CCNA1	JUN					CAPN1		TAB1	CCR6	CAMK1D				BIRC3		CTNNB1	CXCL2	FAM13A	CCL4	CAV1
STN1	HMOX1	MYBL2	MIF					CAPN2		TAB2	CCR9	BACE1				BLM		IL4	IL1RN	CCL2	ACTA2	BDKRB2
TERT	BCL6	LIN9	MMP1					CASP12		TAB3	CCR4	SYCE3				BMI1		SMN2	ADRB2	LTBP4	IL5	PDE5A
TGFA	NANOG	LIN37	MMP10					EIF2AK3		TNFSF13B	CCR7	SARM1				BMP2		MMP7	MUC2	SERPINE2	LAMB1	CD40
TGFB1	HIF1A	LIN52	MMP12					EIF2S1		TNFRSF13C	CCR2	TP53BP2				BMP6		SFTPD	CFTR	KL	PARP1	HYAL2
TIMP1	CEBPD	LIN54	MMP13					ATF4		IKBKG	CCR5	ANKRD1				BRCA1		IL1RN	ITGA4	TIMP2	PDGFA	SERPINE1
TNF	FOS	RBBP4	MMP14					DDIT3		CHUK	CCR1	TGFBR1				BRCA2		MIR21	SLC11A2	TIMP1	IL1RN	PDE3A
	CCND1	FOXM1	MMP2					CTSB		IKBKB	CCR3	DNM1L				BSCL2		LOX	REG3A	EPCAM	MIR140	BCL2L1
	BIRC5	MYC	MMP3					CTSC		PARP1	CCR10	SAP18				BTK		NFE2L2	CCL22	PRTN3	MIR125A	TACR2
	BATF	CDKN2A	MMP7					CTSD		PIAS4	JAK2	DKK1				BUB1B		PLG	C3	MMP10	SKIL	TGFBR2
	POU2F1	MDM2	MMP9					CTSF		UBE2I	JAK3	TEX261				BUB3		MTCO2P12	ELANE	GCG	MIR26B	CX3CL1
	FOXO3	TP53	NGF					CTSH		ATM	STAT1	FNIP1				C1QA		IL17A	FER	MMP14	PTX3	TGFBR1
	ZEB1	RASSF5	PECAM1					CTSK		PIDD1	STAT2	HOXA13				CACNA1A		COX2	FOXP3	NM	MIR101-1	HIF3A
	FOXO1	BTRC	PIGF					CTSL		ERC1	STAT3	GPER1				CALR		IL1A	NFKB1	NOS2	CCL3	SLC2A4
	TWIST1	FBXW11	PLAUR					CTSO		NFKBIA	STAT5B	HTATIP2				CAMK4		SERPINE1	SFTPC	MTOR	MIR10A	TERT
	SOX2	HIPK3	PTGES					CTSS		NFKB1	GNAI1	PLEKHF1				CAMKK2		SMUG1	SFTPA2	PPARG	MIR122	TACR1
	PIM1	HIPK1	RPS6KA5					CTSV		RELA	GNAI3	UBE2M				CARD10		COPD	CR2	ANGPT1	FYN	RELA
	MYC	HIPK2	SERPINB2					CTSW		CFLAR	GNAI2	PRF1				CAT		HSPA4	ICOS	PTEN	MIR200C	CYP1A1
	RORC	HIPK4	SERPINE1					CTSZ		XIAP	ADCY1	INHBB				CBX7		IGF1	ADA	VCP	CMA1	BCL2
	RORA	PPP1CA	TGFB1					BIRC2		BCL2L1	ADCY2	STK3				CCL1		IL10	JAK3	HGF	MIR345	PDGFA
	JUNB	PPP1CB	TIMP1					BIRC3		BCL2	ADCY3	PAK2				CCL13		VIM	NFKB2	SFTPC	MIR378A	PDGFB
	HSPA8	PPP1CC	TIMP2					XIAP		GADD45A	ADCY4	FADD				CCL19		CDKN2A	PRKCD	H2AX	MIR425	PECAM1
	ALOX15	RAF1	TNFRSF10C					BIRC5		GADD45B	ADCY5	EIF2B5				CCL20		NOX4	RAG1	TERT	CALCA	VCAM1
	MAOA	MAP2K1	TNFRSF11B					BCL2L11		GADD45G	ADCY6	FASLG				CCL21		FOXO3	BTK	HHIP	CFD	ATP5PF
	NDN	MAP2K2	TNFRSF1A					BCL2L1		TRAF1	ADCY7	TNFRSF10A				CCL26		PTEN	CARD11	IL18	SERPINE1	SERPINA1
	TP53	MAPK1	TNFRSF1B					BCL2		BCL2A1	ADCY8	APBB1				CCL3		MMP9	CCNO	ITGAX	PDGFB	SMPD3
	BCL2	MAPK3	VEGFA					DAXX		NFKB2	ADCY9	ITGA6				CCL4		SMAD2	TCIRG1	CX3CL1	CXCL2	MFN1
	BCL2L1	ETS1	VEGFC					RIPK1		CXCL8	PRKACA	CCAR1				CCL7		THY1	SLC9A6	GSTP1	IL12B	PTGIS
	MUC1	MAP2K3	WNT2					DAB2IP		TNFAIP3	PRKACB	TRIM39				CCNA2		FGF2	SLC35A1	S100A8	CYSLTR2	TAC1
	IL23R	MAP2K6	IL8					MAP3K5		PTGS2	PRKACG	BCAP31				CD14		EGFR	NPC2	CD274	CEBPA	CDKN1A
	IL6R	MAPK11	TNF					MAPK8		CCL4	LYN	DCUN1D3				CD40LG		MIR155	NLRP3	LOXL2	EGFR	EPHX2
	S1PR1	MAPK12	IFNA2					MAPK10		CCL4L2	HCK	DAPK2				CD55		MYDGF	LRRC56	MOK	IL17A	ESR2
	ITGB1	MAPK13	IFNB1					MAPK9		CCL4L1	FGR	CDK5R1				CD9		PINK1	TNFRSF13C	STAT3	PTGS2	ALAS1
	VCAM1	MAPK14	CCL5					BAD		CXCL1	SRC	IDO1				CDC42		IL33	CCDC151	TIMP3	AGER	FGF2
	ITGAM	GADD45A	IFIT1					JUN		CXCL2	SHC1	REST				CDK1		NR1I2	DNAAF1	CADM1	COL1A1	FGFR1
	ITGAX	GADD45B						FOS		CXCL3	SHC2	RAMP3				CDK7		DECR1	PIH1D3	TM7SF2	PLAU	COL1A1
	ITGB2	GADD45G						TP53		VCAM1	SHC3	CD40LG				CDKN1A		IL25	CRP	MMP28	ACE	HDAC5
	IGHG4	CDK1						HRK		PLAU	SHC4	TRIM13				CDKN2A		SPP1	CD55	FLCN	SMAD4	ALOX5AP
	IGHG1	CCNB1						MAP3K14		CSNK2A1	GRB2	BID				CDKN2B		F2R	DNAAF4	FOSL1	IL1A	MTOR
	CCL11	CCNB2						CHUK		CSNK2A2	SOS1	C1QA				CEBPA		PTK2	ACE	A2M	CD36	GATA4
	IGHE	CCNB3						IKBKB		CSNK2A3	SOS2	HMGB1				CEBPB		SOCS1	DNAH5	CTSS	ELANE	GATA6
	FASLG	MRE11						IKBKG		CSNK2B	HRAS	TLR3				CETP		TSLP	DNMT3B	ADRB2	TGFBR2	EPAS1
	GATA3	RAD50						NFKBIA		RELB	KRAS	HRG				CFLAR		AKT1	RSPH9	CHI3L1	COL1A2	EGR1
	ALOX5	NBN						NFKB1		CCL13	NRAS	SOD2				CHCHD2		MUC1	TNFRSF13B	CASP1	SCGB1A1	EDNRA
	HGF	ATM						RELA		CCL19	RAF1	LGALS16				CHEK2		SLC52A2	LRRC6	SESN2	MMP1	RAMP2
	IL10	CHEK2						PTPN13		CCL21	BRAF	PRNP				CISD2		GLI1	GAS2L2	ATP6V0A2	MFN2	CDKN1B
	TGFB1	RAD9A						GADD45A		CXCL12	MAP2K1	NR3C1				CLOCK		DDR1	GAA	ABCA3	STAT1	CYSLTR1
	LCN2	RAD9B						GADD45B		ICAM1	MAPK1	ATM				CLU		HLA-DRB1	GABPA	ENTPD1	CDH1	GPR182
	SAA1	RAD1						GADD45G			MAPK3	KLF11				CNR1		TWIST1	NIPBL	FOXO3	PDGFRA	CLU
	FGF2	HUS1						TRAF1			PIK3CA	SRC				COQ7		TLR3	DNAH1	CRP	CCL22	COL4A1
	IL23A	ATR						BCL2A1			PIK3CD	TFAP4				CREB1		HMGB1	COPD	H3P10	CCL17	CX3CR1
	LBP	CHEK1						ATM			PIK3CB	STK4				CREB3		MMP28	GAS8	PARP1	ICAM1	NAMPT
	MMP1	CDC25A						PIDD1			PIK3R1	SLC9A1				CREB3L1		CDKN1A	GFI1	FGF7	HSP90AB1	CYBA
	OSM	SQSTM1						TP53AIP1			PIK3R2	PLA2R1				CREB3L2		SPARC	DNAI1	NLRP3	ANXA1	CYBB
	VEGFA	GATA4						BBC3			PIK3R3	DLC1				CREB3L3		TNC	STK36	F2R	HABP2	ECE1
	POMC	TRAF3IP2						PMAIP1			PIK3CG	LGALS1				CREB3L4		WNT1	OSTM1	RGN	NKX2-5	GJA1
	MMP9	NFKB1						CASP2			PIK3R5	PNMA5				CREB5		TIMP3	HMGB1	MAPK3	BAD	SMAD6
	MMP3	RELA						NGF			PIK3R6	ITGA1				CREBBP		LPAR1	IRF8	RNF5	MUC5AC	HMGCR
	MMP2	IL1A						NTRK1			PRKCZ	PDGFRB				CSF2RB		APCS	CCDC39	AIMP1	SFTPC	HMOX1
	IL17A	IL6						IL3			AKT1	HMOX1				CSNK1E		FGF10	MCIDAS	DNER	HSPD1	HMGB1
	IL17F	CXCL8						IL3RA			AKT2	TP73				CTF1		TLR4	RSPH4A	APOM	B3GAT1	BIRC5
	OPRD1	IGFBP3						CSF2RB			AKT3	KATNB1				CTGF		MPO	IFNGR1	S100A4	CCR8	HYAL1
	IL4R	SERPINE1						PIK3CA			FOXO3	GADD45A				CTNNB1		AGT	DNAAF3	CD14	CYSLTR1	ID1
	OPRM1	EIF4EBP1						PIK3CD			CHUK	ING3				CXCL1		IL4R	IL2RG	PTPN6	VWF	IL6
	ANXA1	MAPKAPK2						PIK3CB			IKBKB	POU4F1				CXCL12		SIRT6	IL5	ACVR1B	MUC5B	IL13
	COL1A2	ZFP36L1						PIK3R1			IKBKG	GRIN2B				CXCL2		CCN4	IL7R	PSG2	CCR4	RHOA
	FN1	ZFP36L2						PIK3R2			NFKBIA	SHQ1				CXCL5		CCL18	CXCL8	PSMC5	TERT	SMAD1
	F13A1	CACNA1D						PIK3R3			NFKBIB	CCN1				CXCL6		MIRLET7D	IL10	MSC	CAV1	SMAD4
	LAMA5	TRPV4						PDPK1			NFKB1	OLFM1				CXCL8		NLRP3	ACADVL	XPR1	HPS4	ATP5F1A
	PTPN18	TRPM7						AKT1			RELA	PHLDA1				CYCS		CCL3	DNAJB13	MAN1C1	RTEL1	HDAC1
	PTPN2	CAPN1						AKT2			BAD	SFRP4				DBN1		LOXL2	CCDC103	PTMAP4	TERC	HAS2
	PTPN11	CAPN2						AKT3			GSK3A	FYN				DCTN1		CCND1	LIG4	RHO	PARN	HAS3
	PTPN9	CALML3						HRAS			GSK3B	LCK				DDIT3		TP63	LTBP3	PTMA	SFTPA1	HK1
	PTPN13	CALM2						KRAS			ITK	DEDD2				DDX58		RBM45	MBL2	PTPRO	SFTPA2	PDIA3
	PTPN7	CALM3						NRAS			VAV3	DDX3X				DGAT1		CR1	MPO	SLIT2	IRF5	ANGPT2
	PTPN6	CALM1						RAF1			VAV1	HRK				DLAT		CXCL12	NFE2L2	SFXN1	HLA-DRB1	HAS1
	PTPN14	CALML6						MAP2K1			VAV2	TRAF7				DLL3		CXCL13	PNP	DDIT4	FAM111B	CAVIN1
	PTPN5	CALML5						MAP2K2			RAC1	LGALS9				E2F1		PWAR1	NPHS1	TLR9	CTLA4	PPARG
	PTPN23	CALML4						MAPK1			RAC2	UBB				EDARADD		MMP1	SERPINE1	PLTP	TINF2	BMP2
	PTPN12	PPP3CA						MAPK3			RAC3	WNT5A				EEF1A1		CXCL14	IL21R	PLAGL2	HLA-DPB1	PLA2G7
	PTPN4	PPP3CB									PAK1	FZD9				EEF1E1		IL11	NME8	PIK3CA	DKC1	SELP
	PTPN20	PPP3CC									CDC42	FANK1				EEF2		DCN	ZMYND10	SERPINI1	FASLG	UTS2B
	IKBIP	PPP3R1									WAS	TP53				EFEMP1		CCN1	ACP5	CD74	DCTN4	JUN
	BOLA2	PPP3R2									RHOA	NTRK1				EGF		CXCL10	HYDIN	HDAC4	PRTN3	BMP7
	MSN	NFATC1									ROCK1	HTRA4				EGFR		MSC	DNAAF5	ABCB1	CFTR	ARG1
	MIF	NFATC2									ROCK2	PIP5KL1				EGR1		MIR29A	RNF125	KEAP1	PRKCD	GREM1
	SOD2	NFATC3									GNB1	NOTCH1				EHMT1		IGFBP5	CCDC40	PECAM1	FAS	ARHGEF6
	HNRNPF	NFATC4									GNB2	CDKN1B				EHMT2		CRP	ARMC4	KIF20B	CASP10	VWF
	PDCD4	ITPR1									GNB3	RBCK1				EIF4E		PDGFRB	DNAAF2	CLOCK	ASAH1	ADM
	PITPNA	ITPR2									GNB4	IFIT2				EIF4E1B		S100A4	SLC35C1	NREP	RCBTB1	BMPR1B
	RALA	ITPR3									GNB5	NEUROD1				EIF4E2		ANGPT2	CHD7	TDP1	PIK3CD	F3
	LMNB1	SLC25A4									GNG2	CAMK2D				EIF4EBP1		RXFP1	NSMCE3	SYBU	NR5A1	F2
	LCP1	SLC25A5									GNG3	RNPS1				EIF5A2		TGFBR2	CFAP298	PRCP	PSMC3IP	FGA
	HNRNPDL	SLC25A6									GNG4	CHEK2				ELN		GER	SELENON	EIF2AK3	ATP11A	APOE
	ARF1	SLC25A31									GNG5	PIK3CD				EMD		BCL2	PTPRC	RMDN3	PIK3CB	NOX4
	MTAP	PPID									GNG7	SLIT2				ENO1		SMAD3	ACTA1	PRMT6	NLRP3	TRPC3
	IFNG	VDAC1									GNG8	HTRA1				ENO2		REN	RAG2	MTPAP	ALMS1	HLA-A
	CA1	VDAC2									GNG10	HCAR2				EP300		TGFA	RANBP2	ACP3	ACTB	TRPC6
	GSTO1	VDAC3									GNG11	ADAMTSL4				EPOR		ACE2	RMRP	CD34	SPIDR	VEGFA
	TALDO1	MCU									GNG12	MAL				EPS8		KRT20	RPGR	PGPEP1	POSTN	TRPC4
	SNRPA1										GNG13	LTBR				ERBB2		ANGPT1	RYR1	TBPL1	THOC2
	ANXA2										GNGT1	SCIN				ERCC1		SERPINA1	CFB	PDGFA	HLA-DPA1
	RAP1B										GNGT2	PDCD4				ERCC2		ENPP2	SFTPD	IL33	NHP2
	HNRNPA2B1										PREX1	CTLA4				ERCC3		PHGDH	DCLRE1C	C3	PLEC
	CAPZA1										ELMO1	RACK1				ERCC4		TNFRSF1B	DNAI2	TGFA	PIK3CG
	CNN2										DOCK2	EIF5A				ERCC5		TM7SF2	SGCG	CLPTM1L	CLCA4
	CDC42										PTK2	SYK				ERCC6		PDGFA	SMARCD2	TERF2	SMAD3
	PAK2										PXN	NCOA1				ERCC8		PCNA	SPAG1	LMAN2L	SMAD2
	SERPINB2										BCAR1	NEURL1				ESR1		PTGS1	SRP54	TRBV20OR9-2	NOP10
	PPIA										CRK	ITGAM				FADS1		COX1	STAT3	CDT1	BTNL2
	AIP										CRKL	CTSH				FAS		MST1	TERT	MAP1LC3B	MRPS22
	GSTA2										PTK2B	DAPK1				FBP1		MOK	TTR	TAZ	HIF1A
	TCP1										GNAQ	FAS				FEN1		MAPK1	MUC5B	KLF9	NUP107
	RPLP0										PLCB1	HTT				FGF21		TLR9	SCGB1A1	BSG	PIK3CA
	SOD1										PLCB2	EFNB2				FGF23		MIR34A	WAS	SLC2A10	IL10
	PSME2										PLCB3	BARD1				FGF7		SERPINB3	ZAP70	EHMT1	DPP9
	CFL1										PLCB4	CDKN1A				FGFR1		HSPA1A	DOCK8	SLC52A2	BMP15
	HSP9										PLCG1	SIRT2				FGFR3		HSPA1B	TTC25	C3AR1	SP110
	EBI3										PLCG2	MMP2				FLT1		SFTPB	DNAL1	TXN	PTPN22
											RASGRP2	MMP3				FOS		HSPA5	RSPH3	TLR2	STX1A
											RAP1A	ATG9B				FOXL2		XIAP	CASP8	NKX2-1	RNF168
											RAP1B	IFNB1				FOXM1		HSP90AA1	OFD1	SCGB1A1	STN1
											PARD3	PEA15				FOXO1		SDC2	CFAP300	VDR	RASGRP1
											TIAM1	PDCD1				FOXO3		JUN	CCDC65	XK	SMN1
											PRKCB	GRN				FOXO4		JAK2	DNAH11	KLF10	NOX4
											PRKCD	TGFB2				GAPDH		IGFBP3	TNFSF12	TGFBR3	CTNNB1
											NCF1	DFFA				GCK		IRF5	RSPH1	TFEB	CCR6
											GRK7	RIPK1				GCLC		IL18	UNC119	STAT6	KIAA0319L
											GRK1	SRPK2				GCLM		CXCR2	DRC1	SOD1	SMN2
											GRK2	SERINC3				GDF11		HOXD13	CD19	SOAT1	FSHR
											GRK3	ZC3H8				GDF15		ROS1	MS4A1	TNFSF10	NKX2-1
											GRK4	SQSTM1				GH1		LTBP1	CCDC114	ADAM9	TP53
											GRK5	ADAM8				GHR		MIR30A	CD81	IL18R1	VEGFA
											GRK6	PARP1				GHRH		CD274	ZBTB24	SFTPB	MIR21
											ARRB1	SLC9A3R1				GHRHR		TRBV20OR9-2	LRBA	SFRP1	F2R
											ARRB2	ECSCR				GPX1		HCL2	MAPK14	ASAP2	CXCR4
												LEP				GPX4		MIR185	ALB	NR1I2	TLR4
												TFAP2B				GRB2		ANXA5	IL22	SQSTM1	LOX
												SIAH1				GRIA2		HGF	PPARG	CCL5	GABPA
												PRR7				GRN		ADAM17	CEL	WNT3A	AKT1
												CRADD				GSK3A		MIR18A	AHSA1	BLVRA	PLG
												DUSP9				GSK3B		RHCE	SLC27A5	MBTPS1	COPD
												DNAJA1				GSR		HLA-A	CRK	CAV1	FOSL2
												PHLDA3				GSS		HLA-B	DHFR	HDAC10	GLI1
												TRADD				GSTA4		MIR142	RNF19A	CASP9	ACE2
												NKX3-1				GSTP1		IL9	POLDIP2	SMS	SIRT3
												CRYBA1				GTF2H2		GABPA	HIF1A	SMPD2	BLM
												ARRB2				H2AFX		FCGR3B	MAPK1	SLPI	CXCL12
												MAGED1				HBP1		CHI3L1	ROS1	SKP2	LPAR1
												NTSR1				HDAC1		EZH2	TLR2	PINK1	ANGPT1
												CALCR				HDAC2		FGFR2	AIMP2	BMP1	MMRN1
												NOTCH2				HDAC3		CASP3	PARP9	NR0B2	DECR1
												OMA1				HELLS		EDN1	GRAP2	CAT	TNC
												MTCH2				HESX1		SMG1	DECR1	CH25H	THY1
												AKR1C3				HGF		AIM2	DHPS	ISYNA1	VIM
												FBH1				HIC1		EGF	CXCL10	GLP1R	SIRT1
												CAPN2				HIF1A		FOLR2	PIK3CD	ALB	FSTL1
												IL10				HK3		NLRP1	PTGS2	FBL	SLC27A5
												CLU				HMGB1		E2F1	SFTPB	EPHX2	TM7SF2
												DAB2IP				HMGB2		DNMT1	F2R	EPAS1	JAK2
												OSGIN1				HOXB7		FGF1	IL9	ZBTB7C	PRKAA1
												MAP3K11				HOXC4		DKC1	MIP	MARK2	IL33
												BCL2L11				HRAS		DDIT3	PIK3CG	CELA1	PARP9
												FOXO3				HSF1		ACE	MYDGF	EGF	IFNG
												CTSD				HSP90AA1		TRPA1	VEGFA	ABCA1	COX2
												SMPD1				HSPA1A		RIPK3	CYBB	GPR183	MTCO2P12
												NCK2				HSPA1B		ADIPOQ	ALOX5	HBEGF	SFTPD
												NACC2				HSPA8		VEGFD	AMBP	DSP	LOXL2
												LGALS13				HSPA9		CSF2	ANGPT1	AGT	PRKAB1
												SOD1				HSPD1		TAM	BTBD8	SLC26A3	CEL
												RPL11				HTRA2		EGR1	CD274	SGMS2	PRKAA2
												PDCD2				HTT		MARK2	IFNA1	ALDH2	MMP7
												CASP2				IFNB1		TNFSF10	IFNA13	FDPS	MMP12
												CD160				IGF1		HDAC9	MMP9	FES	MUC1
												DDX20				IGF1R		ELN	COX2	SIGLEC9	CCL18
												SNCA				IGF2		COL3A1	NM	IL37	MIRLET7D
												MAPT				IGFBP1		YAP1	TREM1	PALD1	ZEB1
												IL20RA				IGFBP2		MERTK	SARS2	AMFR	S100A4
												TGFB3				IGFBP3		SERPINH1	SARS1	ABI3BP	REN
												CIDEB				IKBKB		COMP	CAV1	PCSK9	HSPA4
												IL19				IKBKG		LCLAT1	MTCO2P12	XRCC6	NR1I2
												RBM5				IL15		COL1A1	EGFR	IL17RA	LGALS3
												MT-CO2				IL1A		CEACAM5	BRD4	NUP62	MIR34A
												LILRB1				IL1B		BECN1	FOS	ZGLP1	PTEN
												TNFSF12				IL1R1		MS4A1	IL27	FOSB	KLF4
												CASP3				IL2		MTOR	PRMT1	FOS	TMED7-TICAM2
												FAM162A				IL2RG		EP300	IFNB1	FLNA	NT5E
												CDKN2A				IL6		PTPN13	IL2	NLRP1	TICAM2
												TP53INP1				IL6ST		PRC1	MIR155	FGFR1	GLB1
												TLR6				IL7		PTPN11	MMP12	DDIT3	GDF15
												HBA1				IL7R		MIR146B	MUC1	ACE	CD44
												RFPL1				INS		BCHE	PDE4A	PAPOLA	DNM1L
												CDC34				INSR		CCNE2	PIK3CA	MRPS30	DNER
												ALDH1A3				IRS1		MAPKAPK2	PIK3CB	CEACAM7	TSLP
												RARB				IRS2		MRTFA	IL17D	LILRB1	HSP90AA1
												HSPD1				IRS4		PTX3	PGPEP1	CEACAM3	MSC
												PDX1				ITGA2		RAF1	PRCP	KHDRBS1	CCN4
												C3orf38				JAK2		ARHGEF2	PTGDS	CXCL13	SPHK1
												NFATC4				JUN		MIR497	ACE2	PERCC1	SEMA7A
												PXT1				JUND		RAC1	CCL5	FBLN5	HSPB3
												MAP2K6				KCNA3		CRLF1	IL25	CEACAM5	GSK3B
												SIRT1				KCNAB3		RAD51	BMP1	MPHOSPH10	OGG1
												EEF1E1				KL		XPR1	TIMP1	CDK4	SLC52A2
												DDIT4				KRAS		IFT20	TP53	LRPPRC	YY1
												FLCN				LEP		CD40	SOCS3	LINC-ROR	F2RL1
												RIPK3				LEPR		TNFRSF14	CD44	DNM1L	PHEX
												DAXX				LMNA		ABCC3	ADAM8	ABHD2	SMUG1
												RPS6				LMNB1		RHO	NMU	FSTL1	TGFB3
												PIK3CB				LRP2		RIEG2	RIPK3	PDAP1	BRD4
												BBC3				MAP3K14		FKBP10	CCR4	CYP26A1	DDIT3
												BCL10				MAP3K5		TNFSF14	LTB4R	CYP2B6	VTN
												HOXA5				MAP3K7		ROM1	CCN2	AMOTL1	PPARG
												ABL1				MAPK14		RPE65	AGER	CX3CR1	MARK2
												HBG2				MAPK3		MIR486-1	AKT1	RMDN2	ADAM17
												HBG1				MAPK8		MIR455	F2RL1	CTSE	MAPK3
												G0S2				MAPK9		RPS6KB2	F3	COMMD1	PINK1
												FIS1				MAPT		BDNF	FCGR2A	CTNNB1	EGR1
												PTRH2				MAX		IL18R1	FOXM1	VCAN	DNMT1
												RNF183				MDM2		CFLAR	FOSB	PWAR1	BLMH
												DNMT3A				MED1		TM4SF5	FPR1	CNR1	DCN
												CLIP3				MIF		HS6ST2	SMUG1	ZNF816	SPARC
												STYXL1				MLH1		F2RL3	ALOX15	TPP1	TOP1
												LATS1				MMP1		RELA	ARIH1	DBA2	PWAR1
												AIFM1				MMP10		SPHK1	IL37	TUSC2	TMED7
												PITX3				MMP12		HSPB3	HPGDS	C20orf181	FOXO3
												TFPT				MMP13		RELB	APOE	GPX1	MAPK14
												RHOB				MMP14		USP13	IL7	GULP1	PDGFRB
												EIF4G1				MMP2		RET	INSRR	MIR133B	BACH1
												HIP1R				MMP3		ARHGEF7	ITGAX	XRCC6P5	MIR29B2
												ACVR1C				MMP7		RFC2	JUN	MPO	CX3CL1
												PRKRA				MSRA		CCN5	JUNB	MMP7	SDC2
												PRODH				MT-CO1		RGS2	JUND	MEFV	TLR2
												DAPK3				MT1E		TNFRSF10B	ARG1	MDM2	TGFBI
												CCN2				MTOR		STK17B	MRC1	CD46	MIR154
												ADORA2A				MVK		AREL1	NOS2	SMAD7	TFF1
												SAV1				MXD1		MSTO1	OSM	MIR34C	MAPKAPK2
												HBD				MXI1		PTPA	PLA2G1B	MIR223	THBD
												ARL6IP5				MYC		QRSL1	PLG	MIR22	MIR145
												PAK3				MYD88		GDF15	MARCHF1	MIR15B	MCU
												HBZ				MYLK		CD36	PTAFR	MIR155	SDC1
												TXNIP				NBN		MEG3	HAMP	LTBP2	LOXL1
												FOSL1				NCOR1		MIR448	RAC1	LRP5	HDAC4
												GZMA				NCOR2		H4C15	SIGIRR	MYD88	IL18
												LATS2				NFE2L1		TNFRSF8	BCL2	MYH10	IRAK1
												IL12B				NFE2L2		PRKAA1	S100A9	ATD	SOD2
												IL12A				NFKB1		PRKAA2	NOD2	DCTN4	ITGB6
												NUPR1				NFKB2		ABCG2	CLEC7A	RMDN1	SOAT1
												SPHK2				NFKBIA		PRKAB1	TAC1	PCNA	SNAI1
												ENDOG				NGF		HDAC8	TFPI	FOXP3	ROCK2
												ACE				NGFR		TBPL1	TLR3	ASAP1	GRAP2
												ECT2				NLRP3		CCL4L2	VCAM1	REG3A	ST2
												SKIL				NOG		CD151	TRPM8	SERPINE1	STAT4
												RBM10				NR3C1		ADGRE5	WDR26	CD207	KL
												ERCC3				NRAS		PPBP	CAMP	SMARCAL1	LDHA
												TNFRSF1A				NRG1		CTSA	SEMA7A	ORC4	S1PR2
												CAMK2A				NUDT1		PPL	TSLP	OAZ1	SSRP1
												RPS7				PAPPA		PPM1A	NR1I2	NOS3	SLC2A1
												TLE5				PARP1		PARPBP	CD86	NOS1	LGALS1
												FAP				PCK1		SART3	HDAC6	NFKB1	MIR15A
												SOX4				PCMT1		STX17	AD14	NFE2	MIR155
												MYBBP1A				PCNA		MARCHF1	DEFB4B	LOXL1	P2RX7
												THBS1				PDGFB		SLC52A1	NAMPT	LGALS9	MAP1LC3B
												BMP4				PDGFRA		CD68	PLXNC1	IGF1	MPO
												BMP2				PDGFRB		CD47	UBAC1	CLEC4D	MMP13
												PRDM11				PDPK1		ANO1	CAP1	APOA1	PF4
												PLCG1				PECAM1		PRKD1	PROCR	HTC2	LTBP4
												DIABLO				PEX5		PRKDC	CXCL13	APEX1	PTPRC
												BTG1				PIAS4		CD248	SORBS1	HPX	MIP
												BMF				PIDD1		PSMD7	MASP2	NR4A1	SLC52A1
												PLAGL2				PIGF		SLURP1	CHI3L1	HLA-DQB1	MAPK1
												FAF1				PIK3CA		PELI1	IRAK3	SERPIND1	WNT1
												GSK3B				PIK3CB		CEMIP	PTGDR2	GZMB	SETD7
												GSK3A				PIK3CD		PTCH1	KLHL2	EFEMP2	TFEB
												LTK				PIK3R1		KL	LINC02605	GTF2H1	AIMP2
												CYLD				PIK3R2		CCNA2	UCN3	GSTT1	PRKN
												BNIP3L				PIK3R3		RCN3	IL22RA2	GSTM2	ING4
												RIPK2				PIN1		CD163	SCGB3A2	GRN	PDCD1
												GAL				PLAU		PTGFR	CCR8	IGFBP3	ATF3
												PAWR				PLAUR		AICDA	ADORA2B	IGFBP5	MYD88
												PTPN2				PLCG1		NREP	CREBBP	IGFBP7	SIRT6
												GADD45B				PLCG2		KLF4	HT	LCN1	OSM
												TYROBP				PMCH		BACH1	CSF1	NPSR1	DENR
												MEF2C				PML		SLC12A9	PWAR1	JUND	SOCS1
												RASSF2				POLA1		INKA2	CTAA1	JUNB	TNFSF14
												RET				POLB		ARHGAP12	CTNNB1	JUN	PTK2
												LYN				POLD1		SULF2	CTSG	JAK2	PTPN11
												TRIM35				POLG		MAPK7	DEFB4A	ITGAM	TSC1
												PML				PON1		MUC16	DNASE1	IRF3	CXCL16
												LGALS2				POU1F1		MAPK8	MLKL	IL16	SQSTM1
												SLC6A13				PPARA		GRAP2	ELN	IL10	MIR200B
												GSDME				PPARG		CD28	MARK2	IL6ST	MIR18A
												MAP3K10				PPARGC1A		HS6ST1	EMP1	IL4	MOK
												ARHGEF7				PPM1D		PROS2P	ABCA3	IKBKB	TWIST1
												HPR				PPP1CA		TMPRSS4	FABP4	FAS	PSMD9
												HP				PRDX1		PSG2	FCGR1A	CCN1	MAPK7
												CYP1B1				PRKAA1		RETN	FCGR3A	DEXI	MAPK8
												PNMA3				PRKAA2		KIF15	FOXO3		UTRN
												PTGIS				PRKAB1		MIR409	NBEAL2		BECN1
												BAK1				PRKAB2		SOD3	FLT3LG		MARCO
												HTRA2				PRKACA		NR4A3	ICOSLG		SERPINH1
												IAPP				PRKACB		GRHL2	FPR2		TXN
												HLA-G				PRKACG		TAGLN	PLA2G15		MIR29B1
												HBE1				PRKAG1		TAL1	ALOX12		MIR29A
												RGCC				PRKAG2		TAZ	HAVCR1		BDNF
												TIGAR				PRKAG3		AIMP2	IL17C		CXCR6
												BOK				PRKCA		HNF1B	IL17B		YAP1
												E2F1				PRKCB		MIR630	GCLC		RBM45
												TPD52L1				PRKCD		ZEB1	LAMA1		GLRX
												TNFRSF1B				PRKCQ		BTK	ANGPT2		CST3
												SEPTIN4				PRKDC		TMBIM6	GPT		FASN
												DDR2				PROP1		FSD1	GPX1		ANXA5
												DUSP6				PSEN1		TEK	GRN		CNR2
												JUN				PTEN		SYT1	NR3C1		HPGDS
												LTA				PTGES		TET1	GZMB		HSPB1
												TNF				PTGS2		ADAM33	HP		HSPB2
												EPHA7				PTK2		MAP1LC3B	HSPA1A		DCTN6
												RPS6KA2				PTK2B		CDR3	HSPA1B		LTB4R
												ANO6				PTPN1		SLC2A10	HSPA4		GLI2
												TRPV1				PTPN11		TGFBR1	HSPB1		IL37
												MSX1				PYCR1		BRCA2	HSPB2		CBLIF
												STK17A				RACK1		ST14	HSPD1		STING1
												MYC				RAD27		IFT88	APOA1		IFI27
												PRKCD				RAD51		COL18A1	ID2		CSF1R
												EEF1A2				RAD52		STAT4	CCN1		FST
												P2RX7				RAE1		STC1	IL2RA		ANPEP
												TOP2A				RB1		FGF23	IL15		GPX4
												ATP2A2				RB1CC1		STK3	IL16		CD274
												CSRNP3				RECQL4		CD276	AQP5		CREBBP
												CELF1				RELA		LILRA6	AR		NLRP1
												BMP7				RELB		ELOVL6	MALAT1		FOXM1
												ING5				RET		MIR766	KNG1		AHSA1
												ADIPOQ				RFC4		TNS1	LCN2		ANXA2
												IGF2R				RGN		TPMT	LEP		HAS2
												PIDD1				RHEB		C3	LGALS3		CRK
												STPG1				RICTOR		C3AR1	LNPEP		ADORA2B
												TGM2				RIPK1		TYRP1	MIR182		PERCC1
												ATG9A				RORA		TTR	MIR21		CRMP1
												MAP3K9				RPA1		TYRO3	MIR223		ZNRD2
												PIAS4				RPS6KA5		C5AR1	STS		CRYAB
												RAPGEF2				RPS6KB1		GGTLC4P	MCL1		FOLR2
												MOAP1				RPS6KB2		GGTLC3	MEFV		CSF1
												GPLD1				RPTOR		GGT2	MMP3		CTHRC1
												NGFR				S100B		KRT8P3	MMP8		TSPAN1
												INPP5D				SDHC		TXN	MMP13		CCN1
												NF1				SERPINB2		VPS51	CYTB		FOS
												CTNNBL1				SERPINE1		TNFRSF1A	MUC5AC		POLDIP2
												CNR1				SESN1		UTRN	NFATC2		METAP2
												KNG1				SESN2		TGM2	NFKBIA		DPP4
												AGT				SESN3		XRCC1	NOS3		IL7
												RAD9A				SHC1		XK	NOTCH1		RNF19A
												BAD				SIN3A		XBP1	ALDH7A1		CHI3L1
												SLC6A6				SIRT1		WNT7B	P4HB		JAG1
												ZBTB16				SIRT3		TIAM1	PAEP		GAS6
												BLK				SIRT6		TIMP1	HSPA14		H3P23
												HDAC6				SIRT7		TIMP4	CLEC1B		NUDT21
												GATA6				SLC13A1		TLR2	PDCD1		DAPK2
												WNT11				SNCG		VWF	IL23A		RIPK3
												BIN1				SOCS2		VIP	PI3		IL9
												SFPQ				SOD1		VCAM1	SERPINB6		IGFBP3
												FRZB				SOD2		UVRAG	PLAU		IL18BP
												CDK5				SP1		CCR2	PLD2		CDH11
												CAPN10				SPRTN		S100A9	TLR9		ELK1
												C1QBP				SQSTM1		BHLHE40	AVP		LCLAT1
												LGALS14				SST		NOD2	CENPJ		LILRB1
												LPAR1				SSTR3		SELENOP	ACSS2		FBXO32
												NSMAF				STAT3		CXCR5	MAPK3		COX8A
												LRRK2				STAT5A		FBRS	MAPK8		TNFSF4
												BRMS1				STAT5B		H2AC12	PROC		TPH1
												CTSC				STK11		HAVCR2	ACKR3		CHRNA4
												CCAR2				STUB1		PTPN5	MIR511		MIR627
												ACOX2				SUMO1		SEMA7A	MIR146B		C5AR1
												FCGR2B				SUN1		LOXL3	PTPN11		ATF2
												HBB				SYK		SH3BP2	BCHE		C3AR1
												PTPA				TAB1		RETNLB	RGS2		TRPC6
												PARK7				TAB2		LOXL4	RPS19		CREB1
												VDR				TAF1		SRR	BDNF		TMBIM6
												MAP3K5				TBP		SDC1	S100A12		TRBV20OR9-2
												EGR1				TCF3		CXCL5	CCL3		UCN3
												FCER2				TERC		S100A12	SDC1		PPP1R11
												QRICH1				TERF1		NUMB	SDC4		TSC2
												WNT10B				TERF2		AOC3	CXCL12		SLCO6A1
												PMAIP1				TERT		RUNX2	SELL		TSPO
												IFNG				TFAP2A		CCL4	CRLF2		H3P10
												RYBP				TFDP1		CCL5	SFTPA1		H4C11
												SFRP1				TGFB1		CCL7	SLC12A2		TIAM1
												TLR4				TICAM1		CCL8	ADAM17		TNNC1
												CDK19				TIMP1		CCL17	MAP3K7		TIMP3
												PRMT2				TIMP2		DENR	THBS1		H4-16
												CTNNB1				TIRAP		CCL21	TSPO		CLU
												CTNNA1				TLR4		CCL22	NKX2-1		TLR3
												AIMP2				TMEM67		CXCL11	TLR5		TNFRSF1A
												MCL1				TNF		MAGT1	TM7SF2		H3P11
												BAX				TNFAIP3		KREMEN1	TNFAIP6		THBS1
												SUDS3				TNFRSF10C		MAD1L1	NR2C2		CNR1
												ZSWIM2				TNFRSF11A		H4C6	TXN		ADM
												GRIK5				TNFRSF11B		BMP3	VIP		TGFB2
												MYBL2				TNFRSF13C		WNK1	VTN		CRISP2
												CASP8				TNFRSF1A		SLC2A5	VWF		COL11A2
												ITGB1				TNFRSF1B		BMP4	CXCR4		C3
												DKKL1				TNFSF11		H4C4	SLC52A2		CHRM3
												PRELID1				TNFSF13B		GGTLC5P	ARHGEF5		TGFBR1
												NOD1				TNFSF14		BMPR2	ZC3H12A		ACKR2
												TNFAIP8				TOP1		SNAI2	CD276		SELPLG
												ADORA1				TOP2A		SNAI1	CASP3		THAS
												TSPO				TOP2B		SOAT1	ACCS		SCGB3A2
												ATG7				TOP3B		H4C1	CAT		SERPINB3
												IGFBP3				TOPORS		FZD1	HAVCR2		IFIH1
												PPARG				TP53		SKP2	HSH2D		SEMA4A
												ZNF268				TP53BP1		H4C12	RUNX1		SFRP1
												PANO1				TP63		TFRC	AOC3		SFRP4
												IP6K2				TP73		GORASP1	TNFRSF25		DNAH8
												PCSK9				TPP2		H4C14	PER2		DIO2
												RNF122				TRADD		SHMT2	SGPL1		GORASP1
												ADCY10				TRAF1		CASP4	TIMELESS		SHH
												CD248				TRAF2		DEPTOR	HSPB3		DEPTOR
												TRPM2				TRAF3		H4C13	TRPA1		IL25
												BMPR1B				TRAF6		H4C5	LPAR2		CDCP1
												MSX2				TRAP1		H4C2	HACD1		SIX1
												HYAL2				TRIM25		CDCP1	CD5L		SKI
												GRIN2A				TRPS1		SIPA1	CD14		NQO1
												UBE2Z				TRPV1		H4C8	GDF15		SMOC2
												POU4F2				TSC1		H4C3	ENTPD1		SELE
												ZNF622				TSC2		H4C11	CLOCK		ARID3A
												ID3				TXN		H4C9	CD68		BGN
												CCL5				UBB		POU2AF1	C20orf181		AIF1
												CCL2				UBE2I		DNMT3B	VIM2P		EIF4E
												JMY				UCHL1		FGF9	DIP		EPHA2
												AGTR2				UCP1		FGF7	MIR1246		EFNB2
												EIF2S1				UCP2		FER	MIR1247		PGAM5
												MFN2				UCP3		FCGR2A	LINC01672		S1PR3
												MTCH1				ULK1		MARCHF8	OCLN		ECT2
												JAK2				VCAM1		FBN2	SNHG16		ECE1
												AKAP12				VCP		FBN1	MICA		CCL24
												S100A8				VEGFA		FAP	ABCB6		E2F4
												ITGB2				VEGFC		FHIT	LRPPRC		E2F1
												NLRC4				WNT2		NID2	LOC102723996		AGTR1
												ATF2				WRN		DICER1	HAGLROS		SDC4
												ST8SIA2				XIAP		PSME4	CDKN2A		RHOV
												MARK4				XPA		ATG4B	RTN3		DES
												PPP1CA				XRCC5		FOXM1	CCL26		SPINT1
												KCNK2				XRCC6		DKK1	KLF2		SRC
												ING4				YWHAZ		FOXF1	NOD1		SREBF1
												BNIP3				ZAP70		KLRK1	IRAIN		SRF
												ELK1				ZMPSTE24		MLXIP	FST		CRYZ
												B4GALT1						PTK2B	CEACAM5		ROMO1
												MAP2K4						F10	ATG7		CTSK
												MAPK9						ELAVL2	PRDX4		STC1
												MAPK8						PGAM5	SIVA1		STK11
												USP27X						ECT2	ARID3B		CRIP1
												PPP2R1B						ECE1	IVNS1ABP		BSG
												PPP2R1A						AGTR2	PDPN		SYT1
												FOXL2						AGTR1	POSTN		KLF9
												SLC27A4						ARID3A	LARP1BP2		TAGLN
												PDIA3						JAG1	RNU6-392P		CSRP1
												SCRIB						ELAVL3	CELF2		SOX2
												KCNMA1						ELK1	CXCR6		CTNND1
												FOXO1						F2RL1	SIX2		BMP3
												FBXW7						ETS2	GIPC1		WNK1
												SIK1						ETS1	TRAF3IP2		AEBP1
												MNDA						ERN1	CYSLTR1		CYP27B1
												AIFM2						AKT2	JTB		FAM72B
												TNFRSF10C						ERBB2	MORF4L1		CYP2E1
												UNC13B						EPRS1	IMMT		BMPR2
												UCP2						EPHA3	LILRB4		SNAI2
												TNFRSF10B						SIRT3	WWP2		CYLD
												PTGS2						SIRT1	FSTL1		CX3CR1
												PLA2G1B						GGT1	PSIP1		ASPRV1
												PDCD5						GDF10	POLG2		SNCA
												MAP2K7						GREM1	IL17F		RMDN2
												APAF1						GATA6	CHRM3		MIR542
												ANXA1						FBXO8	CHRNA4		TAZ
												ADM						B3GAT3	BUD23		LINC02605
												MLLT11						GAS6	TIRAP		RUNX3
												BCLAF1						INTS1	CHUK		RAMP2
												SLFN11						CBLIF	CIRBP		TRPA1
												ATF6						IL37	H3P42		F2RL3
												ATF4						MUC19	H3P10		TM4SF5
												ATF3						CXCR3	BATF2		ADAM10
												UBD						P4HA3	DCD		SYT7
												KMO						GPR6	TWIST2		ATP6AP2
												DDIT3						CCR10	CLCA1		PLXNC1
												TIMP3						GLRX	CCR3		P2RX6
												TOMM22						GLI2	CCR7		ATG12
												TNFSF10						GLB1	CMKLR1		LPAR2
												DNM2						POLDIP2	CNC2		IL1RL1
												TRAF2						WWTR1	CNR2		LRPPRC
												ASCL1						ALK	RNF19B		XPR1
												LRP1						IL17RA	COL4A5		CDKN2A
												NCK1						DAPK2	IL17RE		MBD2
												APC						FPR2	MAP3K8		KAT5
												PTEN						PADI4	ADM		EIF3A
												CXCR2						FOSB	IL31RA		FBLN5
												RARG						FOS	ADORA2A		MERTK
												ITGA4						BRD4	COX8A		MBTPS1
												PHB1						ALOX5	CP		TNFSF10
												NOS2						ALPI	CLDN7		CBS
												FOXA1						AMBP	CPS1		CCN6
												SRPX						RNF19A	ADORA3		CCN5
												IRF5						TAB3	TRIM69		RAPGEF3
												LAPTM5						PCSK9	PIWIL4		KLF2
												STK17B						ELMOD2	CSF3		CDR1-AS
												CLEC7A						FZD2	PLEKHA7		CDKN2B
												PLEKHN1						ACKR1	VCAN		SGPL1
												ALDH1A2						ALPP	CST3		NAF1
												INHBA						LAMA1	TICAM1		CRLF1
												BCL6						DNAH8	PTPRVP		RPL17-C18orf32
												TNFRSF8						CDH2	CTLA4		CDH5
												EMILIN2						FST	CTSK		MIR1224
												RPS3						ADARB1	CTSS		HDAC6
												NET1						TUBA1B	CUX1		ABCG1
												CASP6						LANCL1	PPM1K		RGS6
												CASP9						CDKN2B	CYLD		CD59
																		ADAR	CYP1A1		MIR541
																		LOC102725035	CYP1A2		ADGRE5
																		SPRY2	CYP2A13		PCLAF
																		FBLN5	CYP2B6		CD151
																		ERN2	GRK2		SPATA2
																		MMP24	CYP2E1		GAB2
																		CEACAM7	CBLL2		ADA
																		LILRB1	DDT		ATG5
																		CEACAM3	CFD		GGPS1
																		LOC107987462	NLRP6		MIR5100
																		CETN1	DPP4		DNM3OS
																		SIRT1-AS	DPT		NREP
																		AHSA1	AGRP		TRIP10
																		RABEPK	HBEGF		SLIT2
																		EIF1	ECE1		MIR4516
																		MICA	ABCA1		P2RX5-TAX1BP3
																		LOC100505909	S1PR1		CD28
																		MIR3918	LPAR1		TMX2-CTNND1
																		MIR1972-1	EDN1		MUC16
																		HDAC6	EDNRA		TMPRSS11D
																		MIR939	PGAM5		NTN1
																		MIR708	EGF		ABCG2
																		CDKN2B-AS1	SERPINB1		AIM2
																		KLRC4-KLRK1	PIKFYVE		SKP2
																		DNM1L	TRIM65		AOC3
																		ADAM10	FBXO15		IL17F
																		ATP6AP2	PRSS55		ELOVL6
																		PLXNC1	EPHX2		MMP28
																		EBI3	EPO		PPARGC1A
																		TSPAN1	ERBB2		NEU3
																		COMETT	ERG		CAPN9
																		CDH11	AKT2		TNFSF13B
																		DNM3OS	ESAT		GRHL2
																		EBNA1BP2	ESR1		CSNK1D
																		CKAP4	ESR2		ZC3H12A
																		CSF1	ETS2		WNT10A
																		MAPK14	F2		ADAM33
																		PARP1	F8		CD276
																		CRYAB	FABP5		FOSL1
																		CRMP1	FCAR		HMGA2
																		CRK	MS4A2		TRPM8
																		CRIP1	FCGR2B		JTB
																		CREBBP	FCGR3B		FAM72A
																		CSF3	FCN2		CHP1
																		CSRP1	FDPS		VPS51
																		SPPL2C	FES		PRRT2
																		CD55	FGF7		VCAM1
																		CYP2C9	FGG		VDR
																		CUX1	CILK1		DUSP10
																		CTSS	FKBP4		CHIT1
																		ASPRV1	FOXF1		TRPV1
																		CTSL	FOXD1		WT1
																		CST3	TPX2		XIST
																		CR2	PHLPP2		CHAT
																		ADORA2B	AKR1B1		MIR454
																		DUSP10	MPRIP		DDR1
																		AKAP13	SULF1		CD226
																		PSIP1	FLT3		H3-4
																		STIN2-VNTR	PES1		ULK1
																		LOC110806263	SEC14L2		ING5
																		NUDT21	PADI4		KHDRBS1
																		LILRB3	LY96		RASAL1
																		METAP2	OSBP2		KISS1R
																		PADI2	FXN		SPZ1
																		H3P28	SPESP1		RETNLB
																		COL4A5	MTOR		LOXL3
																		COL1A2	FUT2		TRIM16
																		CNR2	ACKR1		HAVCR2
																		CNR1	LCLAT1		ENC1
																		CCR7	IBTK		CXCL13
																		H4-16	AOC1		BHLHE40
																		H3P40	MOXD1		ATG7
																		H3P10	PTPN22		CRISPLD2
																		DIO2	GAS6		H4C14
																		MIR130A	GATA3		H4C9
																		MIR323A	FGF21		CAST
																		MRC1	SLC17A5		FZD7
																		MPST	LATS2		CASP1
																		FAS	GDF2		H4C1
																		MPG	GHRHR		H4C4
																		MMP19	SND1		H4C6
																		MMP13	CHIA		H4C12
																		MMP2	NAAA		H4C3
																		MIR326	GLA		H4C8
																		MIR376C	SIGLEC8		H4C2
																		NFATC3	GCLM		SIRT1-AS
																		NEU1	STK39		H4C5
																		ATF4	GOT2		H4C13
																		ATF3	NEAT1		RUNX2
																		MYBPH	OR10A4		MIR301A
																		MUC6	CLEC9A		MMP3
																		PLF	GPR15		SETD2
																		MSR1	PIGW		MMP10
																		MAP3K11	ANK1		GPT
																		MAP3K10	CCDC22		MMP14
																		MIR203A	DROSHA		MMP19
																		MIR186	PYCARD		MPG
																		MIR15A	TBK1		ANGPT2
																		MIR154	GSR		MRC1
																		MIR145	GSTM1		MIR323A
																		MIR144	GSTP1		LAMA1
																		MIR140	GSTT1		MIR328
																		MIR130B	GTF2H4		CXCR3
																		MIR27A	CARD10		MSR1
																		MIR29C	IL19		TBK1
																		MIP	TBX21		MAP3K11
																		MID1	GZMA		GRP
																		MGP	ANXA2		NRG1
																		KITLG	HCCS		MIR30D
																		MECP2	SERPIND1		MIR31
																		CD46	CFH		ADGRE2
																		MARCKS	CFHR1		MIR34B
																		MIR96	ANXA5		MIR96
																		ATP12A	HGF		MARCKS
																		NFKB1	HLA-C		CFHR1
																		PF4	HLA-DPB1		HDAC2
																		PIAS4	HLA-DQA2		MCAM
																		HDAC7	HLA-DRB1		MEN1
																		PDGFB	AOAH		MFAP1
																		SIRT7	HLA-E		GTF2H1
																		SCLY	AOC2		MID1
																		PDE6G	NR4A1		MST1
																		PDE6D	HPR		PLF
																		ATP8B1	HPX		P2RX3
																		ABCB1	HRG		P2RX4
																		GPR84	HSD11B1		P2RX5
																		PLOD1	CFI		FGF21
																		PLN	IFNAR1		P2RY1
																		PLK1	H3P44		P2RY2
																		PKD3	IGF1		P4HB
																		PKD2	APRT		FURIN
																		PKD1	FAS		GATA3
																		PIM1	FASLG		DELEC1
																		PDCD1	AQP1		B3GAT3
																		TLR7	IL10RB		PHGDH
																		NTRK1	IL11		PAWR
																		NT5E	AQP4		FOXP3
																		ACR	IDO1		P2RX1
																		NRF1	IRF4		LATS2
																		NOTCH1	IRF5		ACO2
																		NOS2	ISG20		IFNL3
																		NOS1	ITGA5		CCR10
																		NM	ITGAE		GLS
																		NUP98	ITGAV		NEDD8
																		OSM	ITGB4		NEU1
																		MZB1	JAK1		NFKB1
																		LEF1	IL31		NINJ1
																		SDF4	KRT19		NM
																		ING4	RTL1		NOTCH1
																		ASCC1	LAIR1		NOTCH4
																		DELEC1	LAMC2		IL17B
																		P2RY2	LCT		NTF3
																		P2RX3	LGALS9		DDR2
																		PRRX1	LIF		BBC3
																		LTBP2	MYO18A		ADIPOR1
																		ANK1	LPA		HLA-A
																		HSPA1L	LSP1		TNFRSF9
																		HRG	SH2D1A		GSTK1
																		HPS1	MIR100		IL6ST
																		HPGD	MIR122		IL4R
																		HP	MIR125A		KCNMB1
																		HOXA2	MIR127		MALAT1
																		FOXA2	MIR141		ARG1
																		HMOX1	MIR146A		IL2RA
																		HSPB1	MIR150		IL2
																		HSPB2	MIR15A		LEP
																		LINC01140	MIR17		APRT
																		ICAM1	MIR193A		LMNA
																		IAPP	MIR197		FENDRR
																		HTR7	MIR199A1		IGFBP5
																		HTR2A	MIR199A2		IGFBP2
																		APOA1	MIR20A		JUND
																		HSP90AB1	MIR200B		JUNB
																		BIRC5	MIR200C		JUN
																		HLF	MIR23A		IL15
																		HK2	MIR24-1		IL11RA
																		MYLIP	MIR27A		INPP5D
																		DROSHA	MIR29C		IL11
																		ARHGAP35	MIR34B		ITGA6
																		NR3C1	NBR1		ISG20
																		HIPK2	MIR17HG		ITGA9
																		DCPS	MAS1		ITGAE
																		GPX4	MCAM		ITGAX
																		GPT	CD46		ITGB3
																		TMOD3	MECP2		EIF6
																		EEF2K	MEIS1		IL7R
																		HGFAC	MFAP1		IVD
																		ADGRE2	ASAH1		JAK1
																		HFE	MIF		LRP6
																		HDAC2	NR3C2		LTBR
																		HBE1	MMP2		MIR193A
																		ANXA2	CD200		MIR19A
																		ANXA1	MPP1		MIR19B1
																		TBX21	MIR326		HSPA1A
																		ARMH1	MIR370		HPGD
																		RSPO2	MSMB		MIR205
																		LAMA3	PLF		NR4A1
																		RND3	COX1		MIR210
																		L1CAM	MYH11		MIR221
																		LIN28B	ATF3		HLF
																		CCL4L1	NCF2		MIR27A
																		RHOA	NCF4		MIR27B
																		KRT8	ATM		ANXA11
																		KRT7	WG		HLA-C
																		RPSA	NEO1		MIR185
																		LDHA	NFATC3		HSPA1B
																		LPA	NINJ1		APOA1
																		LOXL1	NPR1		LUM
																		LINC00960	NTF3		IGF2
																		FENDRR	NTS		PWAR4
																		LGALS7	OAS3		IFNB1
																		LGALS3	ATP4A		MIR126
																		LGALS1	P2RY1		MIR130A
																		LEP	P2RY6		MIR130B
																		KRT5	PEBP1		MIR139
																		KRAS	IL20		ID1
																		AQP1	MBL3P		MIR141
																		CXCR1	PRKN		MIR142
																		IL6ST	GP6		MIR144
																		IL6R	PCP4		HTR2A
																		FASLG	CDK16		MIR146A
																		IL2	BPIFA1		HLA-B
																		IGFBP2	TLR8		PCNA
																		IGF1R	TRPV2		EIF2AK2
																		ITGA2	DCDC2		RCN3
																		ITGA5	ISYNA1		PTGER4
																		ARG1	NELFCD		F2
																		KNG1	PDE7A		PTHLH
																		KIT	PDR		MIR503
																		KCNMA1	PECAM1		MIR506
																		JUND	RTEL1		ALB
																		JUNB	CFP		MRTFA
																		ITK	PGF		PRX
																		ITGB8	PHB		TRIB3
																		LTA4H	SERPINA1		ETS2
																			PLA2G2A		PTPN13
																			PLA2G4A		ESR1
																			PLA2G5		PTPRJ
																			PLAT		F2RL2
																			PLCL1		PTCH1
																			PLD1		F3
																			FXYD5		FGFR2
																			IL20RA		PARD3
																			WNT4		FGF13
																			POR		TMPRSS4
																			SMOX		SPHK2
																			EGLN1		TCIM
																			CRLS1		FCGR3B
																			FEV		ACKR3
																			CTSA		PCBP4
																			TUG1		FCGR3A
																			SLC52A1		ZEB1-AS1
																			PTPA		KMT5AP1
																			PREP		FAP
																			PRKACG		F10
																			PRKAR1A		BARD1
																			PRKCA		FBL
																			USE1		STX2
																			PBK		RGS2
																			GSDMB		EP300
																			IL36G		BRD2
																			LTB4R2		RNH1
																			PRSS2		FKBP10
																			SPHK2		ROCK1
																			BAAT		ROS1
																			RLFP1		RPL17
																			PGLYRP4		MIR486-1
																			CD248		MIR455
																			PSMD12		PRSS55
																			CEMIP		S100A6
																			BAG1		S100A9
																			PTGER3		RELA
																			PTGER4		BCL2
																			ABHD6		OPN1LW
																			PTGS1		ERN1
																			SEMA6A		RAC1
																			CFAP97		RAC2
																			EPG5		AKT2
																			PTX3		RAF1
																			BAX		RAG2
																			NLRC4		ERBB3
																			SCAF1		RARRES2
																			RAC2		RASA1
																			MOK		ERBB2
																			RAP1B		GER
																			RARA		TRPV4
																			RARB		RXFP1
																			PLAAT4		RBP2
																			RASA1		SARS1
																			TRPV4		MYDGF
																			REN		RMDN1
																			RENBP		NUP62
																			RIT1		ATP8B1
																			RNASE2		ABCB1
																			RNASE3		PHB
																			BCL6		DDAH1
																			RORA		SERPINE2
																			MIR455		PIGN
																			BDKRB1		FOSB
																			RRBP1		PIN1
																			S100A1		PIP
																			S100B		PLA2G4A
																			SAA1		TRAM1
																			SAA2		PLAUR
																			SAA3P		CBX5
																			SAFB		FUT8
																			SAT1		PECAM1
																			ATXN7		PDK1
																			SCT		PART1
																			CCL13		PRDX5
																			CCL18		TNFRSF12A
																			CCL21		CRNKL1
																			SDC2		PDE1A
																			SELP		CHST15
																			SELPLG		CSAD
																			VSIR		SNX9
																			IFIH1		GTSE1
																			SETMAR		NPNT
																			SEMA4A		SIRT7
																			SFRP5		ELMOD2
																			CXCR5		GAB1
																			SGK1		EBF3
																			SHBG		HEY1
																			SHH		PLK1
																			P2RY12		ATG4B
																			AIDA		SYBU
																			PMEL		FOXD1
																			PINK1		MFN1
																			CDK15		PRKCA
																			BMP4		PRKCB
																			SLC5A1		P2RX2
																			MPPE1		IL26
																			UBE2Z		PAG1
																			WNK4		HDAC8
																			BMP6		PRKDC
																			SLC8A1		FOXF1
																			SLPI		SULF2
																			SMPD1		VEGFD
																			SMPD2		FLT1
																			FSCN1		PRH2
																			SOD2		PRH1
																			BRCA1		POLE3
																			TRIM21		POU2AF1
																			SSRP1		ROBO4
																			BRCA2		EGLN1
																			ST2		PPP1R13B
																			STAT1		PPL
																			BST1		SARS2
																			SYK		FLT3LG
																			TAGLN		RMDN3
																			TBXA2R		FLT3
																			MIR636		MIR448
																			ZEB1		MIR449A
																			TRBV20OR9-2		H4C15
																			PPP1R11		SULF1
																			TEK		FGL1
																			TFRC
																			TGFA
																			THBS2
																			KLF10
																			TIMP3
																			SERPING1
																			TNFAIP3
																			TNNI3
																			CRISP2
																			TRAF1
																			TRAF5
																			C3AR1
																			TRPM2
																			C4BPB
																			TTF1
																			C5AR1
																			TNFSF4
																			TYMS
																			CRPPA
																			UGCG
																			UROD
																			VASP
																			VCP
																			VDR
																			VHL
																			VIM
																			TRPV1
																			WNT5A
																			ZFP36
																			COLEC11
																			ST8SIA4
																			MMP28
																			MUL1
																			CALCA
																			TNFAIP8L2
																			TUT7
																			MAP3K19
																			DNAJC5
																			FOSL1
																			SLC2A10
																			MIA
																			JAM3
																			ITCH
																			LOH19CR1
																			PLA2G6
																			ASCC2
																			FOXN1
																			SPZ1
																			ST11
																			RETNLB
																			MCEE
																			PIK3R3
																			IKBKG
																			PIAS1
																			SOCS1
																			PDE5A
																			BECN1
																			RNGTT
																			RIPK1
																			TNFSF14
																			TNFSF10
																			TNFRSF6B
																			TNFRSF11A
																			SOCS2
																			SPHK1
																			BTRC
																			USP13
																			MAP3K14
																			ARTN
																			GPRC5A
																			DUOXA1
																			CLDN2
																			CLDN1
																			ESAM
																			SMC3
																			CD2
																			EXO1
																			NLRP12
																			SCAF11
																			ARHGEF2
																			XPR1
																			MTSS2
																			MSC
																			S1PR2
																			CD83
																			KLF4
																			SLIT2
																			ADIPOQ
																			CLEC6A
																			CD28
																			HTRA3
																			CD80
																			KCNK6
																			ABCG2
																			TNFRSF8
																			AIM2
																			GGPS1
																			IL27RA
																			PTGES
																			CD40
																			PPP6R2
																			SART3
																			HDAC9
																			AREL1
																			TLK1
																			MRC2
																			RBM8A
																			CDC42
