# Supplementary material for: A single-cell transcriptomic atlas of the lungs of patients with pulmonary tuberculosis
Source: Research Square preprint supplement (doi:10.21203/rs.3.rs-2752256/v1), 2024-03-18
Supplement: Supplementary file 5 [file a4766dfd9415e1526d18bd51.docx]

1. “AL-TB and L-TB lung tissues (biopsy) used in this study were isolated from pulmonary tuberculosis patients. All the decedents met the diagnostic criteria for pulmonary tuberculosis, and all cases were confirmed by micro-CT, Sputum smear and Tuberculin test. After surgical resection, lung tissues of the L-TB and AL-TB were isolated from the same resection specimen at maximal distance (> 2 cm) from the foci of tuberculosis. Control lung tissues were separated from lung cancer and bullae patients. Samples from lung cancer patients at maximal distance (> 5 cm) from the tumor and samples from bullae patients at maximal distance (> 2 cm) from the foci of bullae were obtained. All control samples underwent pathological examination to confirm absence of obvious disease features. All lung tissues were transported rapidly (< 2 h) on ice to the research facility and were subsequently divided into three pieces (One piece for single cell RNA-seq, one piece for bulk RNA-seq and the third piece for pathological staining). Lung samples were collected while all individuals in the cohort were alive, and more detailed information can be found in Supplementary Table 1.”

2. Secondary tuberculosis, also known as adult-onset tuberculosis, occurs in patients who have already been infected with tuberculosis and then develop active tuberculosis after the primary lesion has been quiescent or even healed for a period.

3. Original codes used for the bioinformatics analysis in this study are deposited in GitHub ([https://github.com/PINGjl/Tuberculosis](https://urldefense.com/v3/__https:/github.com/PINGjl/Tuberculosis__;!!NLFGqXoFfo8MMQ!oCkL-QwcziwmNDiWvDAq09G17hJPS9FRbXUcFRA2RXB8jS-vzywDSgdDCrfveIBf0Roj6KBuYbszfjv4sQ$)).
