# Supplementary material for: A single-cell transcriptomic atlas of the lungs of patients with pulmonary tuberculosis
Source: Research Square preprint supplement (doi:10.21203/rs.3.rs-2752256/v1), 2024-03-18
Supplement: Supplementary file 6 [file ae5145b6a3ad0c81e17d2ca2.xlsx]

## Sheet: Table S1
Supplementary Table 1. Information of the human lung samples involved in this study.
Case No.	Age (y) / Gender	Height (cm)	Weight (kg)	Ethnicity	Clinical diagnosis (Patient)	The timing from symptom onset to sampling	Indications for sampling lungs by resection	Posttreatment	Other medical history	Surgery	Procurement type	Anatomical region	Procurement date	Fresh_or_frozen	Clinical diagnosis (Specimen)	Group information	Application
1	19 / Male	170	55	Asian	Donor lung	5 days	Permanent loss of brain function	Anti-infection and hemostasis with Cefuroxim; Reduction of cranial pressure with Mannitol; maintenance of blood pressure with Dopamine and Norepinephrine; control of heart rate with Esmolol; reduction of cerebral oxygen consumption with hypothermia; prevention of stress ulcers with acid suppression;	Fatty liver	Partial pulmonary resection	Surgical resection	Parenchyma right upper lobe	2023.7.2	Fresh	Normal	Control	scRNA-seq; Bulk RNA-seq; staining
2	37 / Male	173	54	Asian	Donor lung	6 days	Permanent loss of brain function	Treatment of hypoproteinemia with human albumin; maintenance of blood pressure with antihypertensive drugs	——	Partial pulmonary resection	Surgical resection	Parenchyma right upper lobe	2023.6.8	Fresh	Normal	Control	scRNA-seq; Bulk RNA-seq; staining
3	43 / Male	165	60	Asian	Donor lung	1 day	Permanent loss of brain function	Maintenance of blood pressure with Urapidil	Hypertension	Partial pulmonary resection	Surgical resection	Parenchyma right upper lobe	2023.6.16	Fresh	Normal	Control	scRNA-seq; Bulk RNA-seq; staining
4	55 / Male	170	65	Asian	Donor lung	2 days	Permanent loss of brain function	Protection of the stomach with Omeprazole sodium; dehydration with Mannitol and Glycerofructose; protection of the liver with Polyenophosphatidylcholine; nutritional treatments for heart with Disodium adenosine triphosphate and Coenzyme A	Hypertension	Partial pulmonary resection	Surgical resection	Parenchyma right upper lobe	2023.7.8	Fresh	Normal	Control	scRNA-seq; Bulk RNA-seq; staining
5	60 / Male	158	62	Asian	Donor lung	4 days	Permanent loss of brain function	Dehydration with Mannitol and Glycerofructose	Hypertension	Partial pulmonary resection	Surgical resection	Parenchyma right upper lobe	2023.6.10	Fresh	Normal	Control	scRNA-seq; Bulk RNA-seq; staining
6	53 / Female	160	55	Asian	Donor lung	3 days	Permanent loss of brain function	Dehydration with Mannitol and Glycerofructose	——	Partial pulmonary resection	Surgical resection	Parenchyma right upper lobe	2023.7.14	Fresh	Normal	Control	scRNA-seq; Bulk RNA-seq; staining
7	61 / Female	165	58	Asian	Pulmonary Adenocarcinoma	15 days	Intermittent coughing and coughing up white sputum with no apparent cause	Preoperative therapy with budesonide atomization; Intermittent oral irbesartan therapy for hypertension	Hypertension	Partial pulmonary resection	Surgical resection	Parenchyma right upper lobe	2019.10.15	Fresh	Normal	Control	scRNA-seq; Bulk RNA-seq; staining
8	25 / Male	170	52	Asian	Pulmonary bulla	1 day	Intermittent right-sided chest pain and discomfort with no apparent cause, primary spontaneous pneumothorax, and pulmonary bullae	Tube drainage surgery for right pneumothorax 5 years ago	Pneumothorax	Partial pulmonary resection	Surgical resection	Parenchyma right upper lobe	2019.11.6	Fresh	Normal	Control	scRNA-seq; Bulk RNA-seq; staining
9	19 / Male	183	68	Asian	Pulmonary bulla	4 days	Right-sided chest pain with no apparent cause, primary spontaneous pneumothorax, and pulmonary bullae	——	——	Partial pulmonary resection	Surgical resection	Parenchyma right upper lobe	2019.11.4	Fresh	Normal	Control	scRNA-seq; Bulk RNA-seq; staining
10	59 / Male	182	75	Asian	Pulmonary cancer	3 monts	Pulmonary cancer	——	——	Partial pulmonary resection	Surgical resection	Parenchyma left upper lobe	2020.1.14	Fresh	Normal	Control	scRNA-seq; Bulk RNA-seq; staining
11	53 / Female	152	63	Asian	Bronchogeniccysts	6 days	Bronchogeniccysts	——	——	Partial pulmonary resection	Surgical resection	Parenchyma right middle lobe	2020.1.14	Fresh	Normal	Control	scRNA-seq; Bulk RNA-seq; staining
12	58 / Male	163	62	Asian	Pulmonary cancer	15 days	Transient left quarterly rib pain without apparent causes; pulmonary cancer	——	——	Partial pulmonary resection	Surgical resection	Parenchyma right upper lobe	2020.1.14	Fresh	Normal	Control	scRNA-seq; Bulk RNA-seq; staining
13	33 / Female	163	52	Asian	Pulmonary cancer	5 days	Pulmonary cancer	Surgery for benign breast nodule 11 months ago	Benign nodule in the right breast	Partial pulmonary resection	Surgical resection	Parenchyma left lower lobe	2020.1.16	Fresh	Normal	Control	scRNA-seq; Bulk RNA-seq; staining
14	57 / Male	176	67	Asian	Secondary pulmonary tuberculosis	4 months	No significant changes in intrapulmonary lesions after 4 months of anti-tuberculosis treatment	Anti-mycobacterium tuberculosis therapy with isoniazid, rifampicin, pyrazinamide, and ethambutol for 4 months; Discontinuation of isoniazid before operation; Levofloxacin treatment after operation	Type II Diabetes	Partial pulmonary resection	Surgical resection	Parenchyma right lower lobe	2019.10.14	Fresh	Adjacent to lesions	AL-TB	scRNA-seq; Bulk RNA-seq; staining
														Fresh	Tuberculous lesions	L-TB	scRNA-seq; Bulk RNA-seq; staining
15	42 / Female	165	60	Asian	Secondary pulmonary tuberculosis	6 months	No significant changes in intrapulmonary lesions after 5 months of anti-tuberculosis treatment	Anti-mycobacterium tuberculosis therapy with isoniazid, rifampicin, and ethambutol for 5 months; Discontinuation of isoniazid before operation; Levofloxacin treatment after operation	Lymphocytic thyroiditis; Cervical intraepithelial neoplasia	Partial pulmonary resection	Surgical resection	Parenchyma left upper lobe	2019.10.21	Fresh	Adjacent to lesions	AL-TB	scRNA-seq; Bulk RNA-seq; staining
														Fresh	Tuberculous lesions	L-TB	scRNA-seq; Bulk RNA-seq; staining
16	35 / Female	156	48.5	Asian	Secondary pulmonary tuberculosis	11 months	Failure to close a cavitary lesion in the right upper lobe of the lung after 11 months of anti-tuberculosis treatment	Anti-mycobacterium tuberculosis therapy with isoniazid, rifampicin, pyrazinamide, and ethambutol for 2 months; Then anti-tuberculosis treatment with isoniazid, and ethambutol for 1.5 months; Then anti-tuberculosis treatment with isoniazid, ethambutol, rifapentine, pyrazinamide for 7.5 months	——	Partial pulmonary resection	Surgical resection	Parenchyma right upper lobe	2019.10.21	Fresh	Adjacent to lesions	AL-TB	scRNA-seq; Bulk RNA-seq; staining
														Fresh	Tuberculous lesions	L-TB	scRNA-seq; Bulk RNA-seq; staining
17	57 / Male	170	70	Asian	Secondary pulmonary tuberculosis	1.5 years	Cavitation of parenchyma right upper lobe with coughing up of blood	Anti-mycobacterium tuberculosis therapy with isoniazid, rifampicin, and ethambutol for 1.5 years	——	Partial pulmonary resection	Surgical resection	Parenchyma right upper lobe	2023.5.30	Fresh	Adjacent to lesions	AL-TB	scRNA-seq; Bulk RNA-seq; staining
														Fresh	Tuberculous lesions	L-TB	scRNA-seq; Bulk RNA-seq; staining
18	23 / Male	182	69	Asian	Secondary pulmonary tuberculosis	6 months	Tuberculous tumor formation in the left upper lobe of the lung; Ineffective anti-tuberculosis treatment accompanied by cough, sputum, and night sweats	Anti-mycobacterium tuberculosis therapy with ethambutol, pyrazinamide, levofloxacin, clofazimine, and cycloserine for 5 months	——	Partial pulmonary resection	Surgical resection	Parenchyma left upper lobe	2023.9.15	Fresh	Adjacent to lesions	AL-TB	scRNA-seq; Bulk RNA-seq; staining
														Fresh	Tuberculous lesions	L-TB	scRNA-seq; Bulk RNA-seq; staining
19	34 / Female	168	48.5	Asian	Secondary pulmonary tuberculosis	7 months	Tuberculous lung destruction and bronchiectasis	Anti-mycobacterium tuberculosis therapy with isoniazid, rifampicin, pyrazinamide, and ethambutol for 20 days; Then anti-tuberculosis treatment with isoniazid, rifampicin, ethambutol and streptomycin for 40 days; Then anti-tuberculosis treatment with rifampicin, ethambutol and levofloxacin for 4 months	——	Partial pulmonary resection	Surgical resection	Parenchyma left upper lobe	2023.9.18	Fresh	Adjacent to lesions	AL-TB	scRNA-seq; Bulk RNA-seq; staining
														Fresh	Tuberculous lesions	L-TB	scRNA-seq; Bulk RNA-seq; staining
20	60 / Male	170	80	Asian	Secondary pulmonary tuberculosis	8 months	Cough with yellowish-brown sputum without any obvious cause appeared 8 months ago, and after diagnosis of pulmonary tuberculosis and treatment, lung destruction was found	Anti-mycobacterium tuberculosis therapy with isoniazid, rifampicin, pyrazinamide, and ethambutol for 8 months	Hypertension	Partial pulmonary resection	Surgical resection	Parenchyma left upper lobe	2023.9.18	Fresh	Adjacent to lesions	AL-TB	scRNA-seq; Bulk RNA-seq; staining
														Fresh	Tuberculous lesions	L-TB	scRNA-seq; Bulk RNA-seq; staining
21	51 / Male	175	60	Asian	Secondary pulmonary tuberculosis	2 months	Poor anti-tuberculosis treatment and formation of tuberculosis cavities	Anti-mycobacterium tuberculosis therapy with isoniazid, rifapentine, streptomycin, and ethambutol for 2 months	Atrophic gastritis with enterocolitis	Partial pulmonary resection	Surgical resection	Parenchyma right upper lobe	2023.9.18	Fresh	Adjacent to lesions	AL-TB	scRNA-seq; Bulk RNA-seq; staining
														Fresh	Tuberculous lesions	L-TB	scRNA-seq; Bulk RNA-seq; staining
22	36 / Male	168	75	Asian	Secondary pulmonary tuberculosis	12 months	Atelectasis of left lower lobe of the lung with cough, sputum, chest pain and fever	Anti-mycobacterium tuberculosis therapy with isoniazid, rifampicin, ethambutol, pyrazinamide for 4 months, rifampicin resistance was found, and the regimen was changed to dipasic, protionamide, rifapentine, and levofloxacin treatment for 8 months	——	Partial pulmonary resection	Surgical resection	Parenchyma left upper lobe	2023.9.19	Fresh	Adjacent to lesions	AL-TB	scRNA-seq; Bulk RNA-seq; staining
														Fresh	Tuberculous lesions	L-TB	scRNA-seq; Bulk RNA-seq; staining
23	24 / Male	173	67	Asian	Secondary pulmonary tuberculosis	15 months	Poor anti-tuberculosis treatment and formation of tuberculosis cavities	Anti-mycobacterium tuberculosis therapy with isoniazid, rifampicin, pyrazinamide, ethambutol, and streptomycin for 15 months	——	Partial pulmonary resection	Surgical resection	Parenchyma left upper lobe	2023.9.25	Fresh	Adjacent to lesions	AL-TB	scRNA-seq; Bulk RNA-seq; staining
														Fresh	Tuberculous lesions	L-TB	scRNA-seq; Bulk RNA-seq; staining
24	53 / Male	155	44	Asian	Secondary pulmonary tuberculosis	17 months	Tuberculous lung destruction with intermittent cough, fever, shortness of breath	Anti-mycobacterium tuberculosis therapy with isoniazid, rifampicin, ethambutol, and streptomycin for 17 months	——	Partial pulmonary resection	Surgical resection	Parenchyma left upper lobe	2023.9.26	Fresh	Adjacent to lesions	AL-TB	Bulk RNA-seq; staining
														Fresh	Tuberculous lesions	L-TB	Bulk RNA-seq; staining
25	57 / Male	159	50	Asian	Secondary pulmonary tuberculosis	3 years	Coughing, sputum production, tuberculosis cavities formation, unsatisfactory anti-tuberculosis therapy	Anti-mycobacterium tuberculosis therapy with isoniazid, rifampicin and ethambutol for 35 months; Then anti-tuberculosis treatment with isoniazid, rifampicin, ethambutol and streptomycin for 20 days	——	Partial pulmonary resection	Surgical resection	Parenchyma left upper lobe	2023.9.26	Fresh	Adjacent to lesions	AL-TB	Bulk RNA-seq; staining
														Fresh	Tuberculous lesions	L-TB	Bulk RNA-seq; staining
26	40 / Male	175	80	Asian	Secondary pulmonary tuberculosis	3 years	Tuberculosis cavities formation of left lung accompanied by cough, hemoptysis, and diarrhea	Anti-mycobacterium tuberculosis therapy with isoniazid, rifampicin, ethambutol, and pyrazinamide for 1 month; Anti-mycobacterium tuberculosis therapy with amikacin, isoniazid, levofloxacin, ethambutol, and pyrazinamide for 6 months; Anti-mycobacterium tuberculosis therapy with isoniazid, levofloxacin, ethambutol, and pyrazinamide for 10 months; Anti-mycobacterium tuberculosis therapy with levoflo…	Type II Diabetes; Fracture of lumbar vertebrae and right clavicle; Perianal abscess; Infection with hepatitis A	Partial pulmonary resection	Surgical resection	Parenchyma left upper lobe	2023.10.16	Fresh	Adjacent to lesions	AL-TB	Bulk RNA-seq; staining
														Fresh	Tuberculous lesions	L-TB	Bulk RNA-seq; staining
27	24 / Male	165	49	Asian	Secondary pulmonary tuberculosis	5 months	Cough with chest pain for 5 months with progressive enlargement of the left lower lobe of the lung	Anti-mycobacterium tuberculosis therapy with isoniazid, rifampicin, pyrazinamide, and ethambutol for 5 months	——	Partial pulmonary resection	Surgical resection	Parenchyma left lower lobe	2023.10.20	Fresh	Adjacent to lesions	AL-TB	Bulk RNA-seq; staining
														Fresh	Tuberculous lesions	L-TB	Bulk RNA-seq; staining
28	48 / Male	167	65	Asian	Secondary pulmonary tuberculosis	18months	Tuberculous lung destruction and bronchiectasis accompanied by cough, sputum, and low-grade fever.	Anti-mycobacterium tuberculosis therapy with isoniazid, ethambutol, pyrazinamide, and levofloxacin for 18 months. Discontinue medication after improvement in condition.	——	Partial pulmonary resection	Surgical resection	Parenchyma right upper lobe	2023.10.23	Fresh	Adjacent to lesions	AL-TB	Bulk RNA-seq; staining
														Fresh	Tuberculous lesions	L-TB	Bulk RNA-seq; staining
29	46 / Male	171	69	Asian	Secondary pulmonary tuberculosis	8 months	Tuberculosis cavities formation with cough, sputum, and cough with blood	Anti-mycobacterium tuberculosis therapy with isoniazid, rifampicin, and moxifloxacin for 4 months	Glomerulonephritis	Partial pulmonary resection	Surgical resection	Parenchyma right upper lobe	2023.10.31	Fresh	Adjacent to lesions	AL-TB	Staining
														Fresh	Tuberculous lesions	L-TB	Staining
30	49 / Male	165	75	Asian	Secondary pulmonary tuberculosis	10 months	Tuberculous lung destruction and unsatisfactory anti-tuberculosis therapy	Anti-mycobacterium tuberculosis therapy with isoniazid, rifampicin, ethambutol, and pyrazinamide for 10 months	——	Partial pulmonary resection	Surgical resection	Parenchyma left lower lobe	2023.11.9	Fresh	Adjacent to lesions	AL-TB	Bulk RNA-seq
														Fresh	Tuberculous lesions	L-TB	Bulk RNA-seq
31	51 / Female	160	42	Asian	Secondary pulmonary tuberculosis	5 months	Tuberculous lung destruction	Anti-mycobacterium tuberculosis therapy with isoniazid, rifampicin, ethambutol, pyrazinamide, and levofloxacin for 5 months	——	Partial pulmonary resection	Surgical resection	Parenchyma right lower lobe	2023.11.14	Fresh	Adjacent to lesions	AL-TB	scRNA-seq; Bulk RNA-seq; staining
														Fresh	Tuberculous lesions	L-TB	scRNA-seq; Bulk RNA-seq; staining
32	42 / Female	158	52	Asian	Secondary pulmonary tuberculosis	12 months	Tuberculous lung destruction of left upper lobe with coughing up of blood	Anti-mycobacterium tuberculosis therapy with Isoniazid, rifampicin, ethambutol and levofloxacin for 12 months	——	Partial pulmonary resection	Surgical resection	Parenchyma left upper lobe	2023.11.15	Fresh	Adjacent to lesions	AL-TB	scRNA-seq; Bulk RNA-seq; staining
														Fresh	Tuberculous lesions	L-TB	scRNA-seq; Bulk RNA-seq; staining
							s
