# Supplementary material for: A single-cell transcriptomic atlas of the lungs of patients with pulmonary tuberculosis
Source: Research Square preprint supplement (doi:10.21203/rs.3.rs-2752256/v1), 2024-03-18
Supplement: Supplementary file 7 [file ba3aee3ba0a0793ed8f2f32b.xlsx]

## Sheet: Table S4
Supplementary Table 4. Transcription factors from bulk RNA-seq and scRNA-seq data.
The Sheet1 shows TFs in differentially expressed genes from bulk RNA-seq data
The Sheet2 shows TFs in TB-dependent genes from scRNA-seq data

## Sheet: Sheet1
TFs in differentially expressed genes from Bulk RNA-seq data
Upstream Regulator	Expr Log Ratio	Molecule Type	p-value of overlap	Target Molecules in Dataset	group
FOXP3	1.991	transcription regulator	3.64e-25	CD40LG,CD69,CDKN1A,CTLA4,CXCL13,DUSP6,EGR1,FOS,FOSL2,FOXP3,GATA3,ICOS,IFNG,IL12RB2,IL2,IL2RA,IL6,IRF4,JUN,MMP9,NFIL3,NR4A1,NR4A3,P2RY10,PRDM1,PTPN22,RGS1,SELL,SLC2A3,TNFAIP3	AL-TB vs.Ctrl
NFATC2	2.636	transcription regulator	4.81e-22	CD40LG,CD83,CDKN1A,CTLA4,CXCL10,EGR3,FOXP3,GATA3,ICOS,IFNG,IL12RB2,IL2,IL2RA,IL6,IRF4,JUN,KDM6B,MYC,NFATC1,NFKBIZ,NR4A1,PELI1,PTGS2,REL,RGS1,RGS2,SELE,SOCS3,ZBTB32	AL-TB vs.Ctrl
REL	2.299	transcription regulator	1.92e-20	CD40LG,CDKN1A,CR2,CREM,CXCL10,FOS,FOSL1,FOXP3,GADD45B,HBEGF,IFNG,IGHG1,IGHM,IL2,IL2RA,IL6,IRF4,JUN,MMP9,MYC,NFATC1,NR4A1,NR4A3,PMAIP1,PPP1R15A,REL,TNFAIP3,TNFRSF13B,TNFRSF13C	AL-TB vs.Ctrl
JUN	1.593	transcription regulator	9.07e-20	AKAP12,ATF3,CCL8,CD68,CDKN1A,CSF3,CXCL10,DUSP5,DUSP6,EREG,FOS,FOSB,FOSL1,FOXC1,IFNG,IGF2,IL2,IL2RA,IL6,JUN,LMNA,mir-221,mir-548,MMP10,MMP9,MYC,NFATC1,NFKBIZ,NR4A1,PADI4,PTGS2,PTHLH,SERPINB9,SERPINE1,SLC2A3,SOCS3,VCAM1,WNT16,ZFP36	AL-TB vs.Ctrl
FOS	1.756	transcription regulator	8.74e-18	ATF3,CD68,CSF3,CXCL10,EGR1,ENO1,EREG,FOS,FOSB,FOSL1,FOXC1,HAS2,IFNG,IKZF3,IL2,IL6,IRF4,JUN,KLF6,MCL1,MMP10,MMP9,MXD1,MYC,NFATC1,NFIL3,NR4A1,PHLDA1,PRDM1,PTGS2,SERPINB9,SERPINE1,SOCS3,TAC1,TIPARP,TNFSF11,VCAM1,WEE1,WNT1	AL-TB vs.Ctrl
POU2AF1	1.819	transcription regulator	8.83e-16	CD69,CD79A,CD83,FOXP3,GATA3,IFNG,IGHG1,IGHM,IL6,IRF4,ITK,MCL1,MYC,PAX5,POU2AF1,PRDM1,SPIB,TNFRSF13C,ZBTB32	AL-TB vs.Ctrl
EGR1	2.381	transcription regulator	3.13e-15	AREG,ATF3,CD40LG,CDKN1A,CREM,EGR1,EREG,FOSL1,FOXP3,GADD45B,HBEGF,IGF2,JUN,LDLR,MMP9,MXD1,MYC,NR4A1,PTGS2,SERPINE1,TNFSF11,VCAM1	AL-TB vs.Ctrl
NFATC1	1.578	transcription regulator	5.68e-15	ATF3,CD40LG,COL10A1,EGR3,FOXP3,ICOS,IFNG,IL2,IL2RA,IL6,MYC,NFATC1,POU2AF1,PRDM1,PTGS2,SELL,TNFSF11,VCAM1	AL-TB vs.Ctrl
CREM	1.539	transcription regulator	6.09e-15	APOLD1,ATF3,BHLHE40,CH25H,CREM,EGR1,ERRFI1,FOS,GADD45B,IFNG,IL2,LDLR,MCL1,NFATC1,NFIL3,NR4A1,NR4A2,PPP1R15A,TAC1,TIPARP	AL-TB vs.Ctrl
KLF6	1.922	transcription regulator	3.77e-14	ATF3,CD83,CDKN1A,GADD45B,IFNG,IL6,KDM6B,KLF10,MCL1,MMP9,MYC,NLRP3,NR4A1,PHLDA1,PMAIP1,PRDM1,PTGS2,REL,SELE,SERPINB8,SGMS2,SOCS3,TNFAIP3,VCAM1	AL-TB vs.Ctrl
BHLHE40	1.616	transcription regulator	4.99e-14	ATF3,BHLHE40,CD69,CSF3,EREG,HBEGF,IFNG,IL12RB2,IL2,IL2RA,IL6,LDLR,MAFF,MMP9,MXD1,NFATC1,NLRP3,PHLDA1,PTGS2,RGS1,SELL,SGMS2,SOCS3,TIPARP,TNFSF11,TNFSF14	AL-TB vs.Ctrl
IRF4	1.651	transcription regulator	9.15e-14	ALPK2,CD68,CTLA4,CXCL10,CXCL9,ELL2,FOXP3,GATA3,GBP1,IFNG,IL2,IL2RA,IL6,IRF4,MS4A1,MYC,NFATC2,PAX5,PRDM1,RGS1,SPIB	AL-TB vs.Ctrl
PRDM1	1.763	transcription regulator	1.76e-13	CD79A,CSF3,F5,FOS,FOSL1,IFNG,IGHG1,IGHM,IL2,IL6,IRF4,MCL1,MYC,NFATC1,NLRP3,PAX5,PMAIP1,PRDM1,PRKCG,SERPINA3,SPIB,TNFRSF10D,TNFRSF13B,TRIB1	AL-TB vs.Ctrl
GATA3	2.191	transcription regulator	3.53e-12	CD3E,CDKN1A,CTLA4,FOS,FOXP3,GATA3,ICOS,IFNG,IL12RB2,IL2,IL2RA,IL6,ITK,KLF4,KMT2E,MMP11,MYC,NFIL3,PAX5,SPIB,VCAM1	AL-TB vs.Ctrl
FOSL1	3.216	transcription regulator	8.03e-11	CSF3,EGR1,FOS,FOSB,FOSL1,IL2,IL6,JUN,MMP10,MMP9,PRDM1,SERPINE1,THBD	AL-TB vs.Ctrl
ZFP36	2.014	transcription regulator	1.21e-10	CDKN1A,FOS,FOSL1,IFNG,IL2,IL6,JUN,MXD1,PRDM1,PTGS2,THBD,VCAM1,ZFP36	AL-TB vs.Ctrl
ATF3	2.757	transcription regulator	3.18e-09	ATF3,CD69,CD83,CDKN1A,IFNG,IL6,JUN,LDLR,NFKBIZ,PMAIP1,POLR2A,PPP1R15A,SELE,SERPINE1	AL-TB vs.Ctrl
MYC	2.008	transcription regulator	1.36e-08	AKAP12,CD69,CDKN1A,CXCL10,CXCL9,CYP26A1,DUSP5,DUSP6,EGR1,EMP1,ENO1,FOS,FOSL1,FOXP3,GADD45B,HAS2,HIVEP2,IL5RA,IL6,IRF4,JUN,KLF10,KLF4,KLF6,LDLR,LINC00173,MCL1,mir-221,MMP9,MX2,MYC,NOCT,PAX5,PMAIP1,PRDM1,PTGS2,PTHLH,SERPINE1,SLC2A3,TNFSF11,VCAM1,WEE1,ZFP36	AL-TB vs.Ctrl
FOXC1	2.267	transcription regulator	1.18e-07	COL10A1,EGR1,FOS,FOSB,GBP1,JUN,KLF6,MAFF,MMP9,MYC,SERPINE1,SOCS3,TNFSF11	AL-TB vs.Ctrl
PAX5	2.816	transcription regulator	2.68e-07	CD79A,CR2,MYC,PAX5,POU2AF1,PRDM1,SERPINA3,SLC2A3,TNFRSF13C,TNFSF14	AL-TB vs.Ctrl
HIVEP2	1.539	transcription regulator	2.87e-07	FOS,GATA3,MYC,NFATC1	AL-TB vs.Ctrl
SPIB	2.336	transcription regulator	3.08e-06	ATF3,EGR1,IKZF3,IL2RA,IRF4,KDM6B,KLF6,P2RY10,PRDM1	AL-TB vs.Ctrl
EGR3	3.162	transcription regulator	4.54e-06	ATF3,BHLHE40,CTLA4,IFNG,IL2RA,JUN,MYC,NFIL3,SOCS3,TNFSF11,ZBTB32	AL-TB vs.Ctrl
ELL2	1.756	transcription regulator	5.56e-06	CYP26A1,IGHM,IRF4,MYC,POU2AF1,PRDM1,TRIB1	AL-TB vs.Ctrl
NFIL3	1.744	transcription regulator	6.37e-05	CD40LG,CDKN1A,GADD45B,IFNG,PTGS2	AL-TB vs.Ctrl
FOSB	3.78	transcription regulator	7.29e-05	FOS,FOSB,FOSL1,MMP9,SERPINE1	AL-TB vs.Ctrl
KLF10	1.755	transcription regulator	0.00012	CDKN1A,FOXP3,GATA3,SERPINE1	AL-TB vs.Ctrl
KLF4	1.831	transcription regulator	0.000271	CDKN1A,CYP26A1,DUSP5,HBEGF,IL6,KLF4,MMP9,MYC,PRDM1,SERPINE1,THBD,TNFSF11,VCAM1	AL-TB vs.Ctrl
ZBTB32	1.542	transcription regulator	0.000548	GATA3,IFNG,IL2	AL-TB vs.Ctrl
ZNF460	1.639	transcription regulator	0.00204	MMP9,MYC	AL-TB vs.Ctrl
RFX2	1.827	transcription regulator	0.00246	IL5RA,LMNA,MYC	AL-TB vs.Ctrl
MSX1	1.509	transcription regulator	0.00314	CDKN1A,MSX1,WNT1	AL-TB vs.Ctrl
NFKBIZ	1.658	transcription regulator	0.00637	CSF3,IFNG,IL6	AL-TB vs.Ctrl
IKZF3	1.836	transcription regulator	0.0102	CD68,KLF4,MYC,NFKBIZ	AL-TB vs.Ctrl
KLF7	1.502	transcription regulator	0.017	CDKN1A,IL6	AL-TB vs.Ctrl
HIVEP1	1.686	transcription regulator	0.0276	IL6,PELI1,TNFAIP3	AL-TB vs.Ctrl
FOXP3	2.827	transcription regulator	5.24e-30	CCL3L3,CCR4,CCR7,CD40LG,CD69,CTLA4,CXCL13,CXCR4,EGR1,EOMES,FOS,FOSL2,FOXP3,GZMK,ICOS,IFNG,IL10,IL12RB2,IL13,IL2,IL2RA,IL2RB,IL5,IL6,IRF4,MMP9,NFIL3,NR4A1,NR4A3,P2RY10,PDCD1,PIM2,PRDM1,PTPN22,RGS1,SELL,SLC2A3,TIGIT,TLR10,TNFAIP3,TNFRSF18,TNFSF8	L-TB vs.Ctrl
IRF4	2.515	transcription regulator	1.05e-22	ALPK2,BTLA,CCL20,CCR4,CCR7,CD28,CTLA4,CXCL10,CXCL9,CXCR4,ELL2,EOMES,FCER2,FOXP3,IFNG,IL10,IL13,IL2,IL23R,IL2RA,IL6,IRF4,LEF1,MS4A1,MYC,NFATC2,PAX5,PIM2,PRDM1,RGS1,RUNX2,RUNX3,SPIB,SPP1,TCF7,TNFRSF9,TNFSF13B	L-TB vs.Ctrl
NFATC2	2.336	transcription regulator	3.6e-20	CCL22,CCL3L3,CCR7,CD40LG,CTLA4,CXCL10,EGR2,EGR3,FCER2,FOXP3,GPNMB,ICOS,IFNG,IL10,IL12RB2,IL13,IL2,IL2RA,IL5,IL6,IRF4,KDM6B,MYC,NR4A1,PDCD1,PTGS2,REL,RGS1,RGS2,SELE,SLAMF6,SOCS3,TNFSF13B,TNFSF8,ZBTB32	L-TB vs.Ctrl
PRDM1	2.059	transcription regulator	5.44e-20	AIM2,BCL11A,BTLA,CCL20,CCR7,CD19,CD22,CD79A,CSF3,CXCR4,EGR2,FCER2,FOS,FOSL1,HLA-DRA,IFNG,IGHG1,IGHM,IL10,IL2,IL24,IL6,IRF4,JCHAIN,LAX1,MYC,NLRP3,PAX5,PDCD1,PMAIP1,PRDM1,PRKCG,SERPINA3,SLC2A5,SPIB,TIGIT,TNFRSF13B,TNFRSF17,TNFSF13B,TRIB1	L-TB vs.Ctrl
POU2AF1	3.631	transcription regulator	6.71e-17	BTLA,CCL22,CD69,CD79A,CD79B,CXCR4,FOXP3,HLA-DRA,IFNG,IGHG1,IGHM,IL10,IL6,IRF4,ITK,LEF1,MYC,PAX5,POU2AF1,PRDM1,SDS,SPIB,SPP1,TNFRSF13C,ZBTB32	L-TB vs.Ctrl
FOS	1.889	transcription regulator	8.2e-17	ADAM12,ATF3,CCL20,COL1A1,CRABP2,CSF3,CXCL10,EGR1,EGR2,ENO1,EREG,FOS,FOSB,FOSL1,FOXC1,HAS2,IBSP,IFNG,IKZF3,IL10,IL2,IL6,IRF4,KLF6,MMP1,MMP10,MMP13,MMP3,MMP9,MYC,NFIL3,NR4A1,PCDH19,PRDM1,PTGS2,PTPRN,RUNX2,RUNX3,SERPINE1,SERPINE2,SFRP4,SLAMF7,SOCS3,SPP1,STAR,SULF2,TLL2,TNFRSF18,TNFSF11,TPP1,VCAM1,WNT1	L-TB vs.Ctrl
REL	1.764	transcription regulator	1.06e-15	CACNA1E,CCL20,CCL4L1/CCL4L2,CD40LG,CR2,CREM,CXCL10,EGR2,FCER2,FOS,FOSL1,FOXP3,IFNG,IGHG1,IGHM,IL13,IL2,IL2RA,IL5,IL6,IRF4,MMP9,MYC,NR4A1,NR4A3,PDCD1,PMAIP1,REL,TNFAIP3,TNFRSF13B,TNFRSF13C,TNFSF13B	L-TB vs.Ctrl
BHLHE40	1.623	transcription regulator	1.24e-15	ATF3,BHLHE40,CCR7,CD69,CP,CRABP2,CSF3,EOMES,EREG,FCGR2B,GPR18,GZMK,IFNG,IL10,IL12RB2,IL13,IL2,IL2RA,IL2RB,IL2RG,IL5,IL6,JCHAIN,LCP2,LEF1,MMP9,NLRP3,PDE4B,PTGS2,RGS1,SELL,SLAMF6,SLAMF7,SOCS3,THY1,TNFRSF9,TNFSF11	L-TB vs.Ctrl
LEF1	2.175	transcription regulator	3.46e-15	ADAM23,BLK,CARD11,CD19,CD79A,CD79B,COL11A1,CTLA4,CXCR4,FCRLA,FOSB,GEM,HAS2,IL12RB2,IL13,IL5,IL6,LEF1,LYZ,MMP13,MSX2,MYC,MZB1,NCF1,NHSL2,NLRP3,PLA2G7,PRDM1,PTGS2,RHOH,RUNX2,SGK1,SPP1,TNFRSF13C,ZC3H12D	L-TB vs.Ctrl
KLF6	1.565	transcription regulator	1.55e-13	ARID5B,ATF3,CCL22,CCL3L3,COL1A1,EGR2,IFNG,IL10,IL6,KDM6B,LCP2,MKI67,MMP12,MMP13,MMP9,MYC,NLRP3,NR4A1,OSM,PDE4B,PLA2G7,PMAIP1,PRDM1,PTGS2,REL,SELE,SGK1,SLAMF7,SOCS3,TNFAIP3,VCAM1	L-TB vs.Ctrl
FOSL1	2.26	transcription regulator	1.78e-13	CCL3L3,CSF3,EGR1,EGR2,FOS,FOSB,FOSL1,IL10,IL2,IL6,MMP1,MMP10,MMP13,MMP3,MMP9,PRDM1,RUNX2,SERPINE1,SERPINE2	L-TB vs.Ctrl
EGR1	2.604	transcription regulator	4.32e-13	AREG,ATF3,CCL3L3,CD40LG,CHGB,COL1A1,COL1A2,CREM,EGR1,EGR2,EREG,FOSL1,FOXP3,IGF2,IL13,LEP,LYZ,MMP9,MYC,NR4A1,PTGS2,SERPINE1,SGK1,SPP1,TNFSF11,VCAM1	L-TB vs.Ctrl
ZFP36	1.964	transcription regulator	3.64e-12	CCL3L3,COL3A1,FOS,FOSL1,IFNG,IL10,IL2,IL5,IL6,LTF,MMP1,NHSL2,OSM,PRDM1,PTGS2,SPP1,VCAM1,ZFP36	L-TB vs.Ctrl
PAX5	4.756	transcription regulator	5.25e-12	BLK,CD19,CD22,CD79A,CD79B,CNR2,CR2,FCER2,IGLL1/IGLL5,JCHAIN,LCP2,MYC,PAX5,POU2AF1,PRDM1,SERPINA3,SLC2A3,TNFRSF13C	L-TB vs.Ctrl
CREM	1.524	transcription regulator	3.55e-09	APOLD1,ATF3,BHLHE40,CH25H,COL3A1,CRABP2,CREM,EGR1,EGR2,FOS,HLA-DRA,IFNG,IL2,NFIL3,NR4A1,NR4A2,PDCD1,STAR,TSHR	L-TB vs.Ctrl
EBF3	1.703	transcription regulator	5.48e-09	CCL11,CCL22,CCL3L3,CCL4L1/CCL4L2,CXCL9,IFNG,IL10,IL6,OSM,TNFSF8	L-TB vs.Ctrl
EOMES	1.896	transcription regulator	5.6e-09	ADCYAP1,COL3A1,CXCR4,CYP26A1,EOMES,FOXC1,FOXP3,IFNG,IL2RB,IL5,MIXL1,MXRA5,PCDH19,PDCD1,PRDM1,RGS2	L-TB vs.Ctrl
EGR2	1.719	transcription regulator	9.25e-09	ATF3,BHLHE40,COL11A1,CTLA4,EGR1,EGR2,FCER2,FOS,IFNG,IGF2,IL10,IL2,IL21R,IL4I1,MYC,MZB1,NFIL3,PRDM1,PTHLH,RASAL1,SOCS3,STAR,TENT5C,TNFSF11,ZBTB32	L-TB vs.Ctrl
FOXC1	2.846	transcription regulator	4.19e-08	COL1A1,CXCR4,EGR1,FOS,FOSB,GPNMB,KLF6,KRT16,MMP13,MMP9,MSX2,MYC,RUNX2,SERPINE1,SOCS3,SPP1,SSTR2,TNFSF11	L-TB vs.Ctrl
FOSB	3.392	transcription regulator	8.81e-08	CCR4,FOS,FOSB,FOSL1,MMP1,MMP13,MMP9,RUNX2,SERPINE1	L-TB vs.Ctrl
RUNX2	1.664	transcription regulator	2.59e-07	COL11A1,COL1A1,COL1A2,IBSP,LEF1,LEP,MKI67,MMP13,MSX2,RUNX2,SERPINE1,SOST,SPP1,TCF7,TNFSF11	L-TB vs.Ctrl
FOSL2	1.586	transcription regulator	7.5e-07	CCR4,COL1A2,FOSL1,IL5,LEP,MMP1,MMP13,MMP3,RUNX2,SPP1	L-TB vs.Ctrl
MYC	2.244	transcription regulator	1.12e-06	ADAMTS1,CACNA1A,CD19,CD69,COL15A1,COL1A1,COL1A2,COL3A1,CRABP2,CXCL10,CXCL9,CXCR4,CYP26A1,DUSP2,DUSP5,EGR1,EGR2,EMP1,ENO1,EOMES,FCGR2B,FOS,FOSL1,FOXP3,GH1,GP1BA,HAS2,HSPH1,IGLL1/IGLL5,IL10,IL6,IRF4,KLF6,KRT17,LEP,LYZ,MAP4K1,MKI67,MMP9,MSX2,MYC,PAX5,PDK1,PMAIP1,PRDM1,PTGS2,PTHLH,SERPINE1,SERPINE2,SGK1,SLC2A3,SLC7A5,SPP1,THBS2,THY1,TNFSF11,TNFSF13B,TWIST1,VCAM1,ZFP36	L-TB vs.Ctrl
SPIB	3.795	transcription regulator	2.28e-06	ATF3,EGR1,EGR2,GEM,IKZF3,IL2RA,IRF4,KDM6B,KLF6,P2RY10,PRDM1,TENT5C	L-TB vs.Ctrl
EGR3	3.585	transcription regulator	4.14e-06	ATF3,BHLHE40,CTLA4,IFNG,IL21R,IL2RA,IL4I1,MYC,MZB1,NFIL3,RASAL1,SOCS3,TENT5C,TNFSF11,ZBTB32	L-TB vs.Ctrl
TCL1A	2.291	transcription regulator	4.49e-06	FCGR2B,FOS,GPNMB,LTF,LY9,MMP12,MMP13,MMP19,MMP9,RGS1,TCL1A	L-TB vs.Ctrl
ELL2	1.615	transcription regulator	4.98e-06	CYP26A1,IGHM,IRF4,MYC,POU2AF1,PRDM1,SLAMF7,TENT5C,TRIB1	L-TB vs.Ctrl
ZBTB32	3.088	transcription regulator	9e-06	IFNG,IL10,IL13,IL2,IL5	L-TB vs.Ctrl
RUNX3	1.523	transcription regulator	4.97e-05	CCR7,CD79A,EOMES,FOXP3,IFNG,IL13,IL5,ILK,MMP9,MYC,SPP1,THY1	L-TB vs.Ctrl
TWIST1	3.237	transcription regulator	0.000111	ADAMTS1,COL1A1,FOS,FOSL1,IL10,IL6,MMP1,MMP9,MYC,RUNX2,RUNX3,SPP1,ST8SIA2,THBS2,TLL2	L-TB vs.Ctrl
ATF3	2.414	transcription regulator	0.000129	ATF3,CCL4L1/CCL4L2,CD69,IFNG,IL6,LINC00941,MMP1,MMP13,MMP3,PMAIP1,SELE,SERPINE1	L-TB vs.Ctrl
NFIL3	1.598	transcription regulator	0.000129	CD40LG,EOMES,IFNG,IL10,IL13,PTGS2	L-TB vs.Ctrl
TCF7	1.742	transcription regulator	0.000144	FOS,FOSL1,IL2,IL6,PRDM1,SPP1,TCF7	L-TB vs.Ctrl
MSX2	1.577	transcription regulator	0.000311	EGR2,IBSP,LEF1,MSX2,SPP1,TWIST1	L-TB vs.Ctrl
ZNF460	1.627	transcription regulator	0.00696	MMP9,MYC	L-TB vs.Ctrl
SOX7	1.757	transcription regulator	0.0166	CRABP2,KRT17,MSX2,PRDM1,STC1	L-TB vs.Ctrl
PAX5	1.946	transcription regulator	5.07e-09	BLK,CD19,CD79A,CD79B,CR2,FCER2,IGLL1/IGLL5,PAX5,POU2AF1,TNFRSF13C	L-TB vs.AL-TB
POU2AF1	1.829	transcription regulator	7.07e-07	CD79A,CD79B,IGHG1,IGHM,PAX5,POU2AF1,SPP1,TNFRSF13C,ZBTB32	L-TB vs.AL-TB
TWIST1	2.106	transcription regulator	0.000315	CCN4,COL1A1,MMP1,SLC28A3,SPP1,ST8SIA2,THBS2,TLL2	L-TB vs.AL-TB
HOXC6	1.863	transcription regulator	0.0424	HOXC6,RFLNA/ZNF664-RFLNA	L-TB vs.AL-TB

## Sheet: Sheet2
TFs in TB-dependent genes from scRNA-seq data
TF	Target gene	highConfAnnot	nMotifs	bestMotif	NES	CoexWeight	celltype
ATF3	ANXA1	TRUE	176	hocomoco__ATF3_MOUSE.H11MO.0.A	6.05	top3sd	AT1
ATF3	ATF3	TRUE	492	hocomoco__ATF3_MOUSE.H11MO.0.A	6.05	top3sd	AT1
ATF3	CLDN4	TRUE	343	hocomoco__ATF3_MOUSE.H11MO.0.A	6.05	top3sd	AT1
ATF3	CSRNP1	TRUE	107	hocomoco__ATF3_MOUSE.H11MO.0.A	6.05	top3sd	AT1
ATF3	FOSB	TRUE	422	hocomoco__ATF3_MOUSE.H11MO.0.A	6.05	top3sd	AT1
ATF3	HBEGF	TRUE	161	hocomoco__ATF3_MOUSE.H11MO.0.A	6.05	top3sd	AT1
ATF3	SERTAD1	TRUE	80	hocomoco__ATF3_MOUSE.H11MO.0.A	6.05	top3sd	AT1
ATF3	UBC	TRUE	307	hocomoco__ATF3_MOUSE.H11MO.0.A	6.05	top3sd	AT1
ATF3	WEE1	TRUE	299	hocomoco__ATF3_MOUSE.H11MO.0.A	6.05	top3sd	AT1
ATF3	ZFP36	TRUE	108	hocomoco__ATF3_MOUSE.H11MO.0.A	6.05	top3sd	AT1
ATF3	DUSP1	TRUE	470	homer__DATGASTCATHN_Atf3	5.49	top3sd	AT1
ATF3	KLF6	TRUE	411	homer__DATGASTCATHN_Atf3	5.49	top3sd	AT1
ATF3	BRD2	TRUE	66	transfac_pro__M00981	5.06	top5perTarget	AT1
ATF3	CCNL1	TRUE	67	transfac_pro__M00981	5.06	top5perTarget	AT1
ATF3	DNAJB4	TRUE	242	transfac_pro__M00981	5.06	top5perTarget	AT1
ATF3	EGR1	TRUE	207	transfac_pro__M00981	5.06	top5perTarget	AT1
ATF3	EIF1	TRUE	47	transfac_pro__M00981	5.06	top5perTarget	AT1
ATF3	ERF	TRUE	75	transfac_pro__M00981	5.06	top5perTarget	AT1
ATF3	ERRFI1	TRUE	154	transfac_pro__M00981	5.06	top5perTarget	AT1
ATF3	FHL1	TRUE	38	transfac_pro__M00981	5.06	top5perTarget	AT1
ATF3	FOS	TRUE	288	transfac_pro__M00981	5.06	top5perTarget	AT1
ATF3	GABARAPL1	TRUE	62	transfac_pro__M00981	5.06	top5perTarget	AT1
ATF3	HSP90AB1	TRUE	59	transfac_pro__M00981	5.06	top5perTarget	AT1
ATF3	JUN	TRUE	338	transfac_pro__M00981	5.06	top5perTarget	AT1
ATF3	JUND	TRUE	363	transfac_pro__M00981	5.06	top5perTarget	AT1
ATF3	LBH	TRUE	65	transfac_pro__M00981	5.06	top5perTarget	AT1
ATF3	MAFF	TRUE	83	transfac_pro__M00981	5.06	top5perTarget	AT1
ATF3	MLF1	TRUE	68	transfac_pro__M00981	5.06	top5perTarget	AT1
ATF3	PER1	TRUE	64	transfac_pro__M00981	5.06	top5perTarget	AT1
ATF3	PPP1R15A	TRUE	340	transfac_pro__M00981	5.06	top5perTarget	AT1
ATF3	RCAN1	TRUE	349	transfac_pro__M00981	5.06	top5perTarget	AT1
ATF3	RRAD	TRUE	14	transfac_pro__M00981	5.06	top5perTarget	AT1
ATF3	SKIL	TRUE	47	transfac_pro__M00981	5.06	top5perTarget	AT1
ATF3	SLC25A25	TRUE	75	transfac_pro__M00981	5.06	top5perTarget	AT1
ATF3	TES	TRUE	56	transfac_pro__M00981	5.06	top5perTarget	AT1
ATF3	TGIF1	TRUE	51	transfac_pro__M00981	5.06	top5perTarget	AT1
ATF3	TRIB1	TRUE	70	transfac_pro__M00981	5.06	top5perTarget	AT1
ATF3	TSC22D2	TRUE	63	transfac_pro__M00981	5.06	top5perTarget	AT1
ATF3	UBB	TRUE	34	transfac_pro__M00981	5.06	top5perTarget	AT1
ATF3	USP54	TRUE	27	transfac_pro__M00981	5.06	top5perTarget	AT1
ATF3	VPS37B	TRUE	81	transfac_pro__M00981	5.06	top5perTarget	AT1
ATF3	ZFP36L1	TRUE	301	transfac_pro__M00981	5.06	top5perTarget	AT1
ATF3	HSPB1	TRUE	36	transfac_pro__M00513	5.05	top3sd	AT1
ATF3	AHR	TRUE	192	cisbp__M6153	4.52	top3sd	AT1
ATF3	NR4A1	TRUE	44	cisbp__M6153	4.52	top3sd	AT1
ATF3	SERTAD3	TRUE	133	transfac_pro__M07313	4.49	top3sd	AT1
ATF3	TRA2A	TRUE	222	transfac_pro__M07313	4.49	top3sd	AT1
ATF3	CYR61	TRUE	184	transfac_pro__M00981	4.32	top3sd	AT1
ATF3	IER2	TRUE	88	cisbp__M4597	3.72	top3sd	AT1
BCL3	BCL3	TRUE	121	transfac_pro__M04816	5.66	top50	AT1
BCL3	DUSP5	TRUE	76	transfac_pro__M04816	5.66	top50	AT1
BCL3	FOSL1	TRUE	20	transfac_pro__M04816	5.66	top50	AT1
BCL3	GADD45B	TRUE	68	transfac_pro__M04816	5.66	top50	AT1
BCL3	IL32	TRUE	12	transfac_pro__M04816	5.66	top50	AT1
BCL3	IRF1	TRUE	92	transfac_pro__M04816	5.66	top50	AT1
BCL3	KDM6B	TRUE	90	transfac_pro__M04816	5.66	top50	AT1
BCL3	KLF10	TRUE	44	transfac_pro__M04816	5.66	top50	AT1
BCL3	MAFF	TRUE	47	transfac_pro__M04816	5.66	top50	AT1
BCL3	NFKBIA	TRUE	101	transfac_pro__M04816	5.66	top50	AT1
BCL3	PMAIP1	TRUE	13	transfac_pro__M04816	5.66	top50	AT1
BCL3	REL	TRUE	89	transfac_pro__M04816	5.66	top50	AT1
BCL3	RND1	TRUE	66	transfac_pro__M04816	5.66	top50	AT1
BCL3	RRAD	TRUE	50	transfac_pro__M04816	5.66	top50	AT1
BCL3	SDC4	TRUE	109	transfac_pro__M04816	5.66	top50	AT1
BCL3	SFN	TRUE	72	transfac_pro__M04816	5.66	top50	AT1
BCL3	C3	TRUE	45	factorbook__NFKB1	5.04	top1sd	AT1
BCL3	CCL2	TRUE	98	factorbook__NFKB1	5.04	top1sd	AT1
BCL3	IFITM1	TRUE	30	factorbook__NFKB1	5.04	top1sd	AT1
BCL3	IFITM2	TRUE	25	factorbook__NFKB1	5.04	top1sd	AT1
BCL3	PTGS2	TRUE	51	factorbook__NFKB1	5.04	top1sd	AT1
BCL3	SEMA4A	TRUE	90	factorbook__NFKB1	5.04	top1sd	AT1
BCL3	SEMA4B	TRUE	84	factorbook__NFKB1	5.04	top1sd	AT1
BCL3	TNFAIP3	TRUE	105	factorbook__NFKB1	5.04	top1sd	AT1
BCL3	VDR	TRUE	75	factorbook__NFKB1	5.04	top1sd	AT1
BCL3	BCL2A1	TRUE	51	factorbook__NFKB1	4.95	top1sd	AT1
BCL3	C6orf132	TRUE	45	factorbook__NFKB1	4.95	top1sd	AT1
BCL3	CSPG5	TRUE	20	factorbook__NFKB1	4.95	top1sd	AT1
BCL3	GCA	TRUE	30	factorbook__NFKB1	4.95	top1sd	AT1
BCL3	IER3	TRUE	80	factorbook__NFKB1	4.95	top1sd	AT1
BCL3	IL1R1	TRUE	42	factorbook__NFKB1	4.95	top1sd	AT1
BCL3	LYN	TRUE	27	factorbook__NFKB1	4.95	top1sd	AT1
BCL3	MFHAS1	TRUE	29	factorbook__NFKB1	4.95	top1sd	AT1
BCL3	PARP14	TRUE	46	factorbook__NFKB1	4.95	top1sd	AT1
BCL3	RALGDS	TRUE	50	factorbook__NFKB1	4.95	top1sd	AT1
BCL3	RFX2	TRUE	44	factorbook__NFKB1	4.95	top1sd	AT1
BCL3	RGS16	TRUE	29	factorbook__NFKB1	4.95	top1sd	AT1
BCL3	SH3D19	TRUE	7	factorbook__NFKB1	4.95	top1sd	AT1
BCL3	SOCS2	TRUE	35	factorbook__NFKB1	4.95	top1sd	AT1
BCL3	SOCS3	TRUE	36	factorbook__NFKB1	4.95	top1sd	AT1
BCL3	TOP1	TRUE	34	factorbook__NFKB1	4.95	top1sd	AT1
BCL3	CISH	TRUE	17	dbcorrdb__BCL3__ENCSR000BKG_1__m4	3.4	top3sd	AT1
BCL3	NAMPT	TRUE	6	transfac_pro__M04816	3.32	top3sd	AT1
BCL3	CDC25B	TRUE	1	dbcorrdb__BCL3__ENCSR000BKG_1__m4	3.27	top1sd	AT1
BCL3	PER2	TRUE	15	dbcorrdb__BCL3__ENCSR000BKG_1__m4	3.27	top1sd	AT1
BCL3	SOX9	TRUE	15	dbcorrdb__BCL3__ENCSR000BKG_1__m4	3.27	top1sd	AT1
BCL3	ABHD2	TRUE	17	dbcorrdb__BCL3__ENCSR000BQH_1__m2	3.06	w0.005	AT1
BCL3	ARL6IP5	TRUE	3	dbcorrdb__BCL3__ENCSR000BQH_1__m2	3.06	w0.005	AT1
BCL3	CLDN4	TRUE	43	dbcorrdb__BCL3__ENCSR000BQH_1__m2	3.06	w0.005	AT1
BCL3	EIF4G1	TRUE	1	dbcorrdb__BCL3__ENCSR000BQH_1__m2	3.06	w0.005	AT1
BCL3	EIF5	TRUE	18	dbcorrdb__BCL3__ENCSR000BQH_1__m2	3.06	w0.005	AT1
BCL3	F3	TRUE	46	dbcorrdb__BCL3__ENCSR000BQH_1__m2	3.06	w0.005	AT1
BCL3	FAM129B	TRUE	15	dbcorrdb__BCL3__ENCSR000BQH_1__m2	3.06	w0.005	AT1
BCL3	FHL1	TRUE	2	dbcorrdb__BCL3__ENCSR000BQH_1__m2	3.06	w0.005	AT1
BCL3	H3F3B	TRUE	18	dbcorrdb__BCL3__ENCSR000BQH_1__m2	3.06	w0.005	AT1
BCL3	KLF4	TRUE	2	dbcorrdb__BCL3__ENCSR000BQH_1__m2	3.06	w0.005	AT1
BCL3	LMNA	TRUE	44	dbcorrdb__BCL3__ENCSR000BQH_1__m2	3.06	w0.005	AT1
BCL3	MKLN1	TRUE	1	dbcorrdb__BCL3__ENCSR000BQH_1__m2	3.06	w0.005	AT1
BCL3	PACSIN2	TRUE	2	dbcorrdb__BCL3__ENCSR000BQH_1__m2	3.06	w0.005	AT1
BCL3	PHLDB2	TRUE	3	dbcorrdb__BCL3__ENCSR000BQH_1__m2	3.06	w0.005	AT1
BCL3	PPP1R10	TRUE	1	dbcorrdb__BCL3__ENCSR000BQH_1__m2	3.06	w0.005	AT1
BCL3	RUNX1	TRUE	48	dbcorrdb__BCL3__ENCSR000BQH_1__m2	3.06	w0.005	AT1
BCL3	SERPINA1	TRUE	2	dbcorrdb__BCL3__ENCSR000BQH_1__m2	3.06	w0.005	AT1
BCL3	SLMAP	TRUE	7	dbcorrdb__BCL3__ENCSR000BQH_1__m2	3.06	w0.005	AT1
BCL3	SRPK1	TRUE	1	dbcorrdb__BCL3__ENCSR000BQH_1__m2	3.06	w0.005	AT1
BCL3	SVIL	TRUE	4	dbcorrdb__BCL3__ENCSR000BQH_1__m2	3.06	w0.005	AT1
BCL3	TRIB1	TRUE	22	dbcorrdb__BCL3__ENCSR000BQH_1__m2	3.06	w0.005	AT1
BCL3	VSTM2L	TRUE	1	dbcorrdb__BCL3__ENCSR000BQH_1__m2	3.06	w0.005	AT1
BCL3	YPEL5	TRUE	2	dbcorrdb__BCL3__ENCSR000BQH_1__m2	3.06	w0.005	AT1
CEBPB	ACSL1	TRUE	105	transfac_pro__M07080	8.78	top3sd	AT1
CEBPB	EREG	TRUE	93	transfac_pro__M07080	8.78	top3sd	AT1
CEBPB	IL1B	TRUE	107	transfac_pro__M07080	8.78	top3sd	AT1
CEBPB	S100A8	TRUE	86	transfac_pro__M07080	8.78	top3sd	AT1
CEBPB	S100A9	TRUE	76	transfac_pro__M07080	8.78	top3sd	AT1
CEBPB	SRGN	TRUE	55	transfac_pro__M07080	8.78	top3sd	AT1
CEBPB	BCL2A1	TRUE	22	cisbp__M6170	8.3	top3sd	AT1
CEBPB	CEBPB	TRUE	59	cisbp__M6170	8.3	top3sd	AT1
CEBPB	G0S2	TRUE	44	cisbp__M6170	8.3	top3sd	AT1
CEBPB	GCA	TRUE	54	cisbp__M6170	8.3	top3sd	AT1
CEBPB	NTM	TRUE	66	cisbp__M6170	8.3	top3sd	AT1
CEBPB	SAMSN1	TRUE	31	cisbp__M6170	8.3	top3sd	AT1
CEBPB	TNFAIP3	TRUE	52	cisbp__M6170	8.3	top3sd	AT1
CEBPB	OLR1	TRUE	44	cisbp__M4556	6.31	top3sd	AT1
CEBPB	NAMPT	TRUE	31	dbcorrdb__CEBPB__ENCSR000EEX_1__m1	5.71	top3sd	AT1
CEBPB	PLAUR	TRUE	10	swissregulon__hs__CEBPA_B_DDIT3.p2	5.17	top3sd	AT1
CEBPB	ZFAND5	TRUE	34	swissregulon__hs__CEBPA_B_DDIT3.p2	5.17	top3sd	AT1
CEBPB	SOCS2	TRUE	5	taipale_tf_pairs__ATF4_CEBPB_NNATGAYGCAAYN_CAP	4.33	top5perTarget	AT1
CEBPB	VSIG4	TRUE	12	taipale_tf_pairs__ATF4_CEBPB_NNATGAYGCAAYN_CAP	4.33	top5perTarget	AT1
CEBPB	B4GALT1	TRUE	6	transfac_pro__M07080	3.79	top1sd	AT1
CEBPB	C4BPA	TRUE	11	transfac_pro__M07080	3.79	top1sd	AT1
CEBPB	CCL20	TRUE	13	transfac_pro__M07080	3.79	top1sd	AT1
CEBPB	ELL2	TRUE	4	transfac_pro__M07080	3.79	top1sd	AT1
CEBPB	GRASP	TRUE	9	transfac_pro__M07080	3.79	top1sd	AT1
CEBPB	LYN	TRUE	16	transfac_pro__M07080	3.79	top1sd	AT1
CEBPB	PER1	TRUE	16	transfac_pro__M07080	3.79	top1sd	AT1
CEBPB	RP1	TRUE	10	transfac_pro__M07080	3.79	top1sd	AT1
CEBPB	SERPINA1	TRUE	15	transfac_pro__M07080	3.79	top1sd	AT1
CEBPB	TPRG1	TRUE	14	transfac_pro__M07080	3.79	top1sd	AT1
CEBPB	YWHAZ	TRUE	28	transfac_pro__M07080	3.79	top1sd	AT1
CEBPB	SOD2	TRUE	10	transfac_pro__M07315	3.76	top3sd	AT1
CEBPB	GNG12	TRUE	3	taipale_tf_pairs__GCM1_CEBPB_ATRSGGGNNNNTTRCGYAAN_CAP_repr	3.61	top1sd	AT1
CEBPB	GPNMB	TRUE	5	taipale_tf_pairs__GCM1_CEBPB_ATRSGGGNNNNTTRCGYAAN_CAP_repr	3.61	top1sd	AT1
CEBPB	HBA2	TRUE	1	taipale_tf_pairs__GCM1_CEBPB_ATRSGGGNNNNTTRCGYAAN_CAP_repr	3.61	top1sd	AT1
CEBPB	IFNGR1	TRUE	7	taipale_tf_pairs__GCM1_CEBPB_ATRSGGGNNNNTTRCGYAAN_CAP_repr	3.61	top1sd	AT1
CEBPB	LYZ	TRUE	7	taipale_tf_pairs__GCM1_CEBPB_ATRSGGGNNNNTTRCGYAAN_CAP_repr	3.61	top1sd	AT1
CEBPB	GABARAPL1	TRUE	17	dbcorrdb__CEBPB__ENCSR000EBV_1__m2	3.41	top50	AT1
CEBPB	H3F3A	TRUE	22	dbcorrdb__CEBPB__ENCSR000EBV_1__m2	3.41	top50	AT1
CEBPB	NR4A3	TRUE	30	dbcorrdb__CEBPB__ENCSR000EBV_1__m2	3.41	top50	AT1
CEBPB	ZFP36L1	TRUE	19	dbcorrdb__CEBPB__ENCSR000EBV_1__m2	3.41	top50	AT1
CEBPB	SLC11A1	TRUE	8	cisbp__M0315	3.33	top3sd	AT1
CEBPB	NFKBIA	TRUE	14	cisbp__M4556	3.26	top1sd	AT1
CEBPB	ANXA7	TRUE	5	swissregulon__hs__CEBPA_B_DDIT3.p2	3.24	top1sd	AT1
CEBPB	GPR65	TRUE	1	swissregulon__hs__CEBPA_B_DDIT3.p2	3.24	top1sd	AT1
CEBPB	IER3	TRUE	1	swissregulon__hs__CEBPA_B_DDIT3.p2	3.24	top1sd	AT1
CEBPB	CCL4	TRUE	1	tfdimers__MD00359	3.07	top10perTarget	AT1
CEBPB	HIF1A	TRUE	2	tfdimers__MD00359	3.07	top10perTarget	AT1
CEBPB	KDELR2	TRUE	2	tfdimers__MD00359	3.07	top10perTarget	AT1
CEBPB	TOB1	TRUE	1	tfdimers__MD00359	3.07	top10perTarget	AT1
CEBPB	PNRC1	TRUE	8	transfac_pro__M00770	3.05	top3sd	AT1
CEBPB	ACTG1	TRUE	4	transfac_public__M00109	3.04	w0.005	AT1
CEBPB	ATF3	TRUE	9	transfac_public__M00109	3.04	w0.005	AT1
CEBPB	EPAS1	TRUE	7	transfac_public__M00109	3.04	w0.005	AT1
CEBPB	FAM134B	TRUE	6	transfac_public__M00109	3.04	w0.005	AT1
CEBPB	FOS	TRUE	6	transfac_public__M00109	3.04	w0.005	AT1
CEBPB	FOSL1	TRUE	7	transfac_public__M00109	3.04	w0.005	AT1
CEBPB	HMGN2	TRUE	4	transfac_public__M00109	3.04	w0.005	AT1
CEBPB	IPO7	TRUE	2	transfac_public__M00109	3.04	w0.005	AT1
CEBPB	ISG20	TRUE	4	transfac_public__M00109	3.04	w0.005	AT1
CEBPB	JUN	TRUE	6	transfac_public__M00109	3.04	w0.005	AT1
CEBPB	JUND	TRUE	6	transfac_public__M00109	3.04	w0.005	AT1
CEBPB	LCN2	TRUE	4	transfac_public__M00109	3.04	w0.005	AT1
CEBPB	LRRN4	TRUE	2	transfac_public__M00109	3.04	w0.005	AT1
CEBPB	PACSIN2	TRUE	2	transfac_public__M00109	3.04	w0.005	AT1
CEBPB	PFN1	TRUE	6	transfac_public__M00109	3.04	w0.005	AT1
CEBPB	PTGS2	TRUE	4	transfac_public__M00109	3.04	w0.005	AT1
CEBPB	RBMS3	TRUE	2	transfac_public__M00109	3.04	w0.005	AT1
CEBPB	RHOB	TRUE	6	transfac_public__M00109	3.04	w0.005	AT1
CEBPB	SFTPD	TRUE	4	transfac_public__M00109	3.04	w0.005	AT1
CEBPB	SLC25A25	TRUE	6	transfac_public__M00109	3.04	w0.005	AT1
CEBPB	SLPI	TRUE	4	transfac_public__M00109	3.04	w0.005	AT1
CEBPB	SUMO2	TRUE	5	transfac_public__M00109	3.04	w0.005	AT1
CEBPB	TRIB1	TRUE	6	transfac_public__M00109	3.04	w0.005	AT1
CEBPB	TUBA1A	TRUE	4	transfac_public__M00109	3.04	w0.005	AT1
CEBPB	VSTM2L	TRUE	4	transfac_public__M00109	3.04	w0.005	AT1
CEBPB	ZFP36L2	TRUE	6	transfac_public__M00109	3.04	w0.005	AT1
CEBPB	CD163	TRUE	3	taipale_tf_pairs__FLI1_CEBPB_RNCGGANNTTGCGCAAN_CAP	3.01	top50	AT1
CEBPB	GABARAP	TRUE	5	taipale_tf_pairs__FLI1_CEBPB_RNCGGANNTTGCGCAAN_CAP	3.01	top50	AT1
CEBPB	GHITM	TRUE	8	taipale_tf_pairs__FLI1_CEBPB_RNCGGANNTTGCGCAAN_CAP	3.01	top50	AT1
CLOCK	ESRP1	TRUE	35	transfac_pro__M01116	5.65	top50perTargetAndtop50	AT1
CLOCK	NR1D1	TRUE	65	transfac_pro__M01116	5.65	top50perTargetAndtop50	AT1
CLOCK	NR1D2	TRUE	71	transfac_pro__M01116	5.65	top50perTargetAndtop50	AT1
CLOCK	PANK3	TRUE	43	transfac_pro__M01116	5.65	top50perTargetAndtop50	AT1
CLOCK	POGK	TRUE	51	transfac_pro__M01116	5.65	top50perTargetAndtop50	AT1
CLOCK	UBE2Q1	TRUE	78	transfac_pro__M01116	5.65	top50perTargetAndtop50	AT1
CLOCK	XPOT	TRUE	46	transfac_pro__M01116	5.65	top50perTargetAndtop50	AT1
CLOCK	FAM167A	TRUE	29	flyfactorsurvey__gce_Clk_SANGER_5_FBgn0023076	4.74	top50perTargetAndtop50	AT1
CLOCK	QSOX1	TRUE	17	flyfactorsurvey__gce_Clk_SANGER_5_FBgn0023076	4.74	top50perTargetAndtop50	AT1
CLOCK	SYNC	TRUE	2	flyfactorsurvey__gce_Clk_SANGER_5_FBgn0023076	4.74	top50perTargetAndtop50	AT1
CLOCK	IGF2R	TRUE	29	cisbp__M0200	3.34	top1sd	AT1
CLOCK	MECOM	TRUE	14	cisbp__M0200	3.34	top1sd	AT1
CLOCK	REPS2	TRUE	5	cisbp__M0200	3.34	top1sd	AT1
CLOCK	SGMS1	TRUE	21	flyfactorsurvey__Clk_cyc_SANGER_5_FBgn0023076	3.34	top50perTargetAndtop50	AT1
CLOCK	TRIM73	TRUE	18	cisbp__M0200	3.34	top1sd	AT1
CLOCK	PLD3	TRUE	15	transfac_pro__M08909	3.28	top50perTargetAndtop50	AT1
CLOCK	SPRED1	TRUE	15	transfac_pro__M08909	3.28	top50perTargetAndtop50	AT1
CLOCK	KANK2	TRUE	4	flyfactorsurvey__gce_Clk_SANGER_5_FBgn0023076	3.26	top50perTargetAndtop50	AT1
CLOCK	MFSD6	TRUE	1	flyfactorsurvey__gce_Clk_SANGER_5_FBgn0023076	3.26	top50perTargetAndtop50	AT1
CLOCK	MRAS	TRUE	18	flyfactorsurvey__gce_Clk_SANGER_5_FBgn0023076	3.26	top50perTargetAndtop50	AT1
CLOCK	RNF169	TRUE	8	flyfactorsurvey__gce_Clk_SANGER_5_FBgn0023076	3.26	top50perTargetAndtop50	AT1
CLOCK	ALPL	TRUE	8	transfac_pro__M07247	3.2	top1sd	AT1
CLOCK	ALPP	TRUE	1	transfac_pro__M07247	3.2	top1sd	AT1
CLOCK	C1orf116	TRUE	2	transfac_pro__M07247	3.2	top1sd	AT1
CLOCK	CAPN8	TRUE	1	transfac_pro__M07247	3.2	top1sd	AT1
CLOCK	DLAT	TRUE	2	transfac_pro__M07247	3.2	top1sd	AT1
CLOCK	EPB41L3	TRUE	1	transfac_pro__M07247	3.2	top1sd	AT1
CLOCK	ESYT3	TRUE	1	transfac_pro__M07247	3.2	top1sd	AT1
CLOCK	HYAL2	TRUE	3	transfac_pro__M07247	3.2	top1sd	AT1
CLOCK	IPO5	TRUE	1	transfac_pro__M07247	3.2	top1sd	AT1
CLOCK	LNX2	TRUE	1	transfac_pro__M07247	3.2	top1sd	AT1
CLOCK	MFHAS1	TRUE	21	transfac_pro__M07247	3.2	top1sd	AT1
CLOCK	MYO1D	TRUE	1	transfac_pro__M07247	3.2	top1sd	AT1
CLOCK	NPEPPS	TRUE	2	transfac_pro__M07247	3.2	top1sd	AT1
CLOCK	PDCD6IP	TRUE	14	transfac_pro__M07247	3.2	top1sd	AT1
CLOCK	PFKFB2	TRUE	6	transfac_pro__M07247	3.2	top1sd	AT1
CLOCK	PIK3CB	TRUE	1	transfac_pro__M07247	3.2	top1sd	AT1
CLOCK	PKP3	TRUE	3	transfac_pro__M07247	3.2	top1sd	AT1
CLOCK	RAB3GAP2	TRUE	13	transfac_pro__M07247	3.2	top1sd	AT1
CLOCK	RHOBTB2	TRUE	3	transfac_pro__M07247	3.2	top1sd	AT1
CLOCK	SLC33A1	TRUE	9	transfac_pro__M07247	3.2	top1sd	AT1
CLOCK	SNX22	TRUE	1	transfac_pro__M07247	3.2	top1sd	AT1
CLOCK	TRIM25	TRUE	13	transfac_pro__M07247	3.2	top1sd	AT1
CREM	CREM	TRUE	95	transfac_pro__M00801	4.1	top10perTarget	AT1
CREM	DUSP2	TRUE	30	transfac_pro__M00801	4.1	top10perTarget	AT1
CREM	ELL2	TRUE	90	transfac_pro__M00801	4.1	top10perTarget	AT1
CREM	FYN	TRUE	53	transfac_pro__M00801	4.1	top10perTarget	AT1
CREM	GMFG	TRUE	8	transfac_pro__M00801	4.1	top10perTarget	AT1
CREM	GPR65	TRUE	19	transfac_pro__M00801	4.1	top10perTarget	AT1
CREM	ISG20	TRUE	27	transfac_pro__M00801	4.1	top10perTarget	AT1
CREM	NR4A2	TRUE	84	transfac_pro__M00801	4.1	top10perTarget	AT1
CREM	NR4A3	TRUE	88	transfac_pro__M00801	4.1	top10perTarget	AT1
CREM	RPS3	TRUE	4	transfac_pro__M00801	4.1	top10perTarget	AT1
CREM	RUNX3	TRUE	61	transfac_pro__M00801	4.1	top10perTarget	AT1
CREM	SELK	TRUE	36	transfac_pro__M00801	4.1	top10perTarget	AT1
CREM	STK4	TRUE	4	transfac_pro__M00801	4.1	top10perTarget	AT1
CREM	SYTL3	TRUE	41	transfac_pro__M00801	4.1	top10perTarget	AT1
CREM	TPT1	TRUE	85	transfac_pro__M00801	4.1	top10perTarget	AT1
CREM	TSC22D3	TRUE	39	transfac_pro__M00801	4.1	top10perTarget	AT1
CREM	YPEL5	TRUE	11	transfac_pro__M00801	4.1	top10perTarget	AT1
CREM	ZNF331	TRUE	15	transfac_pro__M00801	4.1	top10perTarget	AT1
CREM	ARID5A	TRUE	25	transfac_pro__M00916	3.59	w0.005Andw0.001	AT1
CREM	ATF3	TRUE	50	transfac_pro__M00916	3.59	w0.005Andw0.001	AT1
CREM	BCAS2	TRUE	70	transfac_pro__M00916	3.59	w0.005Andw0.001	AT1
CREM	BTG1	TRUE	78	transfac_pro__M00916	3.59	w0.005Andw0.001	AT1
CREM	CACYBP	TRUE	48	transfac_pro__M00916	3.59	w0.005Andw0.001	AT1
CREM	CCNL1	TRUE	23	transfac_pro__M00916	3.59	w0.005Andw0.001	AT1
CREM	CEBPB	TRUE	29	transfac_pro__M00916	3.59	w0.005Andw0.001	AT1
CREM	CYTIP	TRUE	48	transfac_pro__M00916	3.59	w0.005Andw0.001	AT1
CREM	EGR1	TRUE	40	transfac_pro__M00916	3.59	w0.005Andw0.001	AT1
CREM	EIF1	TRUE	63	transfac_pro__M00916	3.59	w0.005Andw0.001	AT1
CREM	EMD	TRUE	70	transfac_pro__M00916	3.59	w0.005Andw0.001	AT1
CREM	EPS15	TRUE	15	transfac_pro__M00916	3.59	w0.005Andw0.001	AT1
CREM	ERF	TRUE	37	transfac_pro__M00916	3.59	w0.005Andw0.001	AT1
CREM	FOSB	TRUE	45	transfac_pro__M00916	3.59	w0.005Andw0.001	AT1
CREM	GADD45A	TRUE	12	transfac_pro__M00916	3.59	w0.005Andw0.001	AT1
CREM	GPBP1	TRUE	78	transfac_pro__M00916	3.59	w0.005Andw0.001	AT1
CREM	HSP90AB1	TRUE	40	transfac_pro__M00916	3.59	w0.005Andw0.001	AT1
CREM	IER2	TRUE	36	transfac_pro__M00916	3.59	w0.005Andw0.001	AT1
CREM	JUN	TRUE	36	transfac_pro__M00916	3.59	w0.005Andw0.001	AT1
CREM	JUND	TRUE	77	transfac_pro__M00916	3.59	w0.005Andw0.001	AT1
CREM	KLF6	TRUE	33	transfac_pro__M00916	3.59	w0.005Andw0.001	AT1
CREM	KLF9	TRUE	44	transfac_pro__M00916	3.59	w0.005Andw0.001	AT1
CREM	LBH	TRUE	42	transfac_pro__M00916	3.59	w0.005Andw0.001	AT1
CREM	LYN	TRUE	3	transfac_pro__M00916	3.59	w0.005Andw0.001	AT1
CREM	MAFF	TRUE	42	transfac_pro__M00916	3.59	w0.005Andw0.001	AT1
CREM	PER1	TRUE	50	transfac_pro__M00916	3.59	w0.005Andw0.001	AT1
CREM	PER2	TRUE	46	transfac_pro__M00916	3.59	w0.005Andw0.001	AT1
CREM	PNRC1	TRUE	43	transfac_pro__M00916	3.59	w0.005Andw0.001	AT1
CREM	PPP1R10	TRUE	34	transfac_pro__M00916	3.59	w0.005Andw0.001	AT1
CREM	PPP1R15A	TRUE	47	transfac_pro__M00916	3.59	w0.005Andw0.001	AT1
CREM	RCAN1	TRUE	46	transfac_pro__M00916	3.59	w0.005Andw0.001	AT1
CREM	RPL21	TRUE	42	transfac_pro__M00916	3.59	w0.005Andw0.001	AT1
CREM	SKIL	TRUE	60	transfac_pro__M00916	3.59	w0.005Andw0.001	AT1
CREM	SLC25A25	TRUE	44	transfac_pro__M00916	3.59	w0.005Andw0.001	AT1
CREM	SRSF6	TRUE	17	transfac_pro__M00916	3.59	w0.005Andw0.001	AT1
CREM	TRA2B	TRUE	25	transfac_pro__M00916	3.59	w0.005Andw0.001	AT1
CREM	TRIB1	TRUE	40	transfac_pro__M00916	3.59	w0.005Andw0.001	AT1
CREM	TSC22D2	TRUE	29	transfac_pro__M00916	3.59	w0.005Andw0.001	AT1
CREM	UBC	TRUE	32	transfac_pro__M00916	3.59	w0.005Andw0.001	AT1
CREM	UBQLN1	TRUE	41	transfac_pro__M00916	3.59	w0.005Andw0.001	AT1
CREM	VPS37B	TRUE	79	transfac_pro__M00916	3.59	w0.005Andw0.001	AT1
CREM	YWHAZ	TRUE	43	transfac_pro__M00916	3.59	w0.005Andw0.001	AT1
CREM	BRD2	TRUE	31	transfac_pro__M00917	3.57	w0.005Andw0.001	AT1
CREM	CCL4	TRUE	43	transfac_pro__M00917	3.57	w0.005Andw0.001	AT1
CREM	CD3G	TRUE	12	transfac_pro__M00917	3.57	w0.005Andw0.001	AT1
CREM	CST7	TRUE	11	transfac_pro__M00917	3.57	w0.005Andw0.001	AT1
CREM	FAM46C	TRUE	15	transfac_pro__M00917	3.57	w0.005Andw0.001	AT1
CREM	FOS	TRUE	43	transfac_pro__M00917	3.57	w0.005Andw0.001	AT1
CREM	FOSL1	TRUE	35	transfac_pro__M00917	3.57	w0.005Andw0.001	AT1
CREM	INSIG1	TRUE	32	transfac_pro__M00917	3.57	w0.005Andw0.001	AT1
CREM	KDM6B	TRUE	29	transfac_pro__M00917	3.57	w0.005Andw0.001	AT1
CREM	KLF4	TRUE	7	transfac_pro__M00917	3.57	w0.005Andw0.001	AT1
CREM	MLF1	TRUE	38	transfac_pro__M00917	3.57	w0.005Andw0.001	AT1
CREM	OLR1	TRUE	26	transfac_pro__M00917	3.57	w0.005Andw0.001	AT1
CREM	RALGDS	TRUE	26	transfac_pro__M00917	3.57	w0.005Andw0.001	AT1
CREM	RBM3	TRUE	45	transfac_pro__M00917	3.57	w0.005Andw0.001	AT1
CREM	RPL18	TRUE	45	transfac_pro__M00917	3.57	w0.005Andw0.001	AT1
CREM	RPLP2	TRUE	39	transfac_pro__M00917	3.57	w0.005Andw0.001	AT1
CREM	SDCBP	TRUE	4	transfac_pro__M00917	3.57	w0.005Andw0.001	AT1
CREM	SKP1	TRUE	16	transfac_pro__M00917	3.57	w0.005Andw0.001	AT1
CREM	SLC38A1	TRUE	16	transfac_pro__M00917	3.57	w0.005Andw0.001	AT1
CREM	SOX9	TRUE	27	transfac_pro__M00917	3.57	w0.005Andw0.001	AT1
CREM	SURF4	TRUE	9	transfac_pro__M00917	3.57	w0.005Andw0.001	AT1
CREM	TMEM66	TRUE	41	transfac_pro__M00917	3.57	w0.005Andw0.001	AT1
CREM	TNFRSF1B	TRUE	22	transfac_pro__M00917	3.57	w0.005Andw0.001	AT1
CREM	ZFAND5	TRUE	35	transfac_pro__M00917	3.57	w0.005Andw0.001	AT1
CREM	ANKRD11	TRUE	32	transfac_pro__M00981	3.24	w0.005Andw0.001	AT1
CREM	ATP1B3	TRUE	51	transfac_pro__M00981	3.24	w0.005Andw0.001	AT1
CREM	DDX3X	TRUE	9	transfac_pro__M00981	3.24	w0.005Andw0.001	AT1
CREM	DNAJB4	TRUE	27	transfac_pro__M00981	3.24	w0.005Andw0.001	AT1
CREM	GABARAPL1	TRUE	51	transfac_pro__M00981	3.24	w0.005Andw0.001	AT1
CREM	GRASP	TRUE	12	transfac_pro__M00981	3.24	w0.005Andw0.001	AT1
CREM	HERPUD1	TRUE	13	transfac_pro__M00981	3.24	w0.005Andw0.001	AT1
CREM	HLA-E	TRUE	6	transfac_pro__M00981	3.24	w0.005Andw0.001	AT1
CREM	HSPH1	TRUE	25	transfac_pro__M00981	3.24	w0.005Andw0.001	AT1
CREM	IFNGR1	TRUE	9	transfac_pro__M00981	3.24	w0.005Andw0.001	AT1
CREM	NAMPT	TRUE	43	transfac_pro__M00981	3.24	w0.005Andw0.001	AT1
CREM	PMAIP1	TRUE	47	transfac_pro__M00981	3.24	w0.005Andw0.001	AT1
CREM	PTPN11	TRUE	3	transfac_pro__M00981	3.24	w0.005Andw0.001	AT1
CREM	REL	TRUE	54	transfac_pro__M00981	3.24	w0.005Andw0.001	AT1
CREM	RGS1	TRUE	31	transfac_pro__M00981	3.24	w0.005Andw0.001	AT1
CREM	RGS10	TRUE	8	transfac_pro__M00981	3.24	w0.005Andw0.001	AT1
CREM	RPL13	TRUE	47	transfac_pro__M00981	3.24	w0.005Andw0.001	AT1
CREM	RPS29	TRUE	54	transfac_pro__M00981	3.24	w0.005Andw0.001	AT1
CREM	RRAD	TRUE	16	transfac_pro__M00981	3.24	w0.005Andw0.001	AT1
CREM	RUNX1	TRUE	21	transfac_pro__M00981	3.24	w0.005Andw0.001	AT1
CREM	SEPTIN6	TRUE	27	transfac_pro__M00981	3.24	w0.005Andw0.001	AT1
CREM	SF1	TRUE	27	transfac_pro__M00981	3.24	w0.005Andw0.001	AT1
CREM	TGIF1	TRUE	11	transfac_pro__M00981	3.24	w0.005Andw0.001	AT1
CREM	UBB	TRUE	15	transfac_pro__M00981	3.24	w0.005Andw0.001	AT1
CREM	UBE2S	TRUE	23	transfac_pro__M00981	3.24	w0.005Andw0.001	AT1
CREM	ZFP36L1	TRUE	34	transfac_pro__M00981	3.24	w0.005Andw0.001	AT1
CREM	ARL4A	TRUE	46	transfac_pro__M00916	3.22	top10perTarget	AT1
CREM	CD37	TRUE	7	transfac_pro__M00916	3.22	top10perTarget	AT1
CREM	CD69	TRUE	1	transfac_pro__M00916	3.22	top10perTarget	AT1
CREM	DUSP5	TRUE	21	transfac_pro__M00916	3.22	top10perTarget	AT1
CREM	EMP3	TRUE	8	transfac_pro__M00916	3.22	top10perTarget	AT1
CREM	ETS1	TRUE	14	transfac_pro__M00916	3.22	top10perTarget	AT1
CREM	GZMA	TRUE	2	transfac_pro__M00916	3.22	top10perTarget	AT1
CREM	GZMB	TRUE	29	transfac_pro__M00916	3.22	top10perTarget	AT1
CREM	HLA-A	TRUE	7	transfac_pro__M00916	3.22	top10perTarget	AT1
CREM	LTB	TRUE	3	transfac_pro__M00916	3.22	top10perTarget	AT1
CREM	PABPC1	TRUE	17	transfac_pro__M00916	3.22	top10perTarget	AT1
CREM	RAC2	TRUE	7	transfac_pro__M00916	3.22	top10perTarget	AT1
CREM	RPL10	TRUE	11	transfac_pro__M00916	3.22	top10perTarget	AT1
CREM	RPL34	TRUE	23	transfac_pro__M00916	3.22	top10perTarget	AT1
CREM	RPL39	TRUE	15	transfac_pro__M00916	3.22	top10perTarget	AT1
CREM	RPL41	TRUE	15	transfac_pro__M00916	3.22	top10perTarget	AT1
CREM	RPS13	TRUE	18	transfac_pro__M00916	3.22	top10perTarget	AT1
CREM	RPS14	TRUE	10	transfac_pro__M00916	3.22	top10perTarget	AT1
CREM	RPS27	TRUE	15	transfac_pro__M00916	3.22	top10perTarget	AT1
CREM	RPS8	TRUE	19	transfac_pro__M00916	3.22	top10perTarget	AT1
CREM	SH2D2A	TRUE	27	transfac_pro__M00916	3.22	top10perTarget	AT1
CREM	SRGN	TRUE	22	transfac_pro__M00916	3.22	top10perTarget	AT1
CREM	TNFAIP3	TRUE	17	transfac_pro__M00916	3.22	top10perTarget	AT1
CREM	TSPYL2	TRUE	8	transfac_pro__M00916	3.22	top10perTarget	AT1
CREM	ZFP36L2	TRUE	29	transfac_pro__M00916	3.22	top10perTarget	AT1
CREM	ARHGDIB	TRUE	22	jaspar__MA0609.1	3.07	top10perTarget	AT1
CREM	C12orf75	TRUE	18	jaspar__MA0609.1	3.07	top10perTarget	AT1
CREM	CD7	TRUE	10	jaspar__MA0609.1	3.07	top10perTarget	AT1
CREM	DDIT4	TRUE	12	jaspar__MA0609.1	3.07	top10perTarget	AT1
CREM	FXYD5	TRUE	5	jaspar__MA0609.1	3.07	top10perTarget	AT1
CREM	LSP1	TRUE	40	jaspar__MA0609.1	3.07	top10perTarget	AT1
CREM	MT1X	TRUE	13	jaspar__MA0609.1	3.07	top10perTarget	AT1
CREM	NACA	TRUE	5	jaspar__MA0609.1	3.07	top10perTarget	AT1
CREM	RHOH	TRUE	7	jaspar__MA0609.1	3.07	top10perTarget	AT1
CREM	RPL17	TRUE	17	jaspar__MA0609.1	3.07	top10perTarget	AT1
CREM	RPL32	TRUE	4	jaspar__MA0609.1	3.07	top10perTarget	AT1
CREM	RPS10	TRUE	2	jaspar__MA0609.1	3.07	top10perTarget	AT1
CREM	RPS27A	TRUE	10	jaspar__MA0609.1	3.07	top10perTarget	AT1
CREM	RPS3A	TRUE	12	jaspar__MA0609.1	3.07	top10perTarget	AT1
CREM	RPS5	TRUE	2	jaspar__MA0609.1	3.07	top10perTarget	AT1
CREM	SPON2	TRUE	3	jaspar__MA0609.1	3.07	top10perTarget	AT1
CREM	VIM	TRUE	12	jaspar__MA0609.1	3.07	top10perTarget	AT1
CREM	ARF6	TRUE	15	transfac_pro__M00981	3.04	top50perTarget	AT1
CREM	CLK1	TRUE	17	transfac_pro__M00981	3.04	top50perTarget	AT1
CREM	H3F3B	TRUE	18	transfac_pro__M00981	3.04	top50perTarget	AT1
CREM	HNRNPA0	TRUE	18	transfac_pro__M00981	3.04	top50perTarget	AT1
CREM	IFRD1	TRUE	27	transfac_pro__M00981	3.04	top50perTarget	AT1
CREM	JUNB	TRUE	22	transfac_pro__M00981	3.04	top50perTarget	AT1
CREM	KLF2	TRUE	7	transfac_pro__M00981	3.04	top50perTarget	AT1
CREM	PLK3	TRUE	28	transfac_pro__M00981	3.04	top50perTarget	AT1
CREM	PPP1R2	TRUE	28	transfac_pro__M00981	3.04	top50perTarget	AT1
CREM	PTMA	TRUE	11	transfac_pro__M00981	3.04	top50perTarget	AT1
CREM	RPL13A	TRUE	22	transfac_pro__M00981	3.04	top50perTarget	AT1
CREM	RPL24	TRUE	26	transfac_pro__M00981	3.04	top50perTarget	AT1
EGR1	ACTB	TRUE	5	dbcorrdb__EGR1__ENCSR000BNE_1__m1	3.71	top5perTarget	AT1
EGR1	ACTG1	TRUE	9	dbcorrdb__EGR1__ENCSR000BNE_1__m1	3.71	top5perTarget	AT1
EGR1	CTGF	TRUE	13	dbcorrdb__EGR1__ENCSR000BNE_1__m1	3.71	top5perTarget	AT1
EGR1	EGR1	TRUE	20	dbcorrdb__EGR1__ENCSR000BNE_1__m1	3.71	top5perTarget	AT1
EGR1	ELL2	TRUE	9	dbcorrdb__EGR1__ENCSR000BNE_1__m1	3.71	top5perTarget	AT1
EGR1	ERRFI1	TRUE	14	dbcorrdb__EGR1__ENCSR000BNE_1__m1	3.71	top5perTarget	AT1
EGR1	FAM46B	TRUE	6	dbcorrdb__EGR1__ENCSR000BNE_1__m1	3.71	top5perTarget	AT1
EGR1	IER3	TRUE	4	dbcorrdb__EGR1__ENCSR000BNE_1__m1	3.71	top5perTarget	AT1
EGR1	JUNB	TRUE	15	dbcorrdb__EGR1__ENCSR000BNE_1__m1	3.71	top5perTarget	AT1
EGR1	KLF9	TRUE	9	dbcorrdb__EGR1__ENCSR000BNE_1__m1	3.71	top5perTarget	AT1
EGR1	NR4A1	TRUE	14	dbcorrdb__EGR1__ENCSR000BNE_1__m1	3.71	top5perTarget	AT1
EGR1	RCAN1	TRUE	10	dbcorrdb__EGR1__ENCSR000BNE_1__m1	3.71	top5perTarget	AT1
EGR1	RNASE4	TRUE	3	dbcorrdb__EGR1__ENCSR000BNE_1__m1	3.71	top5perTarget	AT1
EGR1	SEMA4A	TRUE	11	dbcorrdb__EGR1__ENCSR000BNE_1__m1	3.71	top5perTarget	AT1
EGR1	SRF	TRUE	6	dbcorrdb__EGR1__ENCSR000BNE_1__m1	3.71	top5perTarget	AT1
EGR1	FOS	TRUE	13	transfac_pro__M08996	3.59	top5perTarget	AT1
EGR1	PTGS2	TRUE	6	transfac_pro__M08996	3.59	top5perTarget	AT1
EGR1	CYR61	TRUE	9	transfac_pro__M07354	3.57	top5perTarget	AT1
EGR1	JUN	TRUE	9	transfac_pro__M07354	3.57	top5perTarget	AT1
EGR1	IER2	TRUE	11	cisbp__M3167	3.43	top3sd	AT1
EGR1	TRIB1	TRUE	3	jaspar__MA0162.2	3.34	top5perTarget	AT1
ENO1	EIF4G1	TRUE	1	cisbp__M6210	3.02	top1sd	AT1
ENO1	HIF1A	TRUE	1	cisbp__M6210	3.02	top1sd	AT1
ENO1	IPO7	TRUE	1	cisbp__M6210	3.02	top1sd	AT1
ENO1	MAL2	TRUE	1	cisbp__M6210	3.02	top1sd	AT1
ENO1	RPL13A	TRUE	1	cisbp__M6210	3.02	top1sd	AT1
ENO1	TOP1	TRUE	1	cisbp__M6210	3.02	top1sd	AT1
ENO1	XPOT	TRUE	1	cisbp__M6210	3.02	top1sd	AT1
ETS1	CCL5	TRUE	33	homer__AACAGGAAGT_Ets1-distal	5.13	top3sd	AT1
ETS1	CD48	TRUE	23	homer__AACAGGAAGT_Ets1-distal	5.13	top3sd	AT1
ETS1	CD53	TRUE	42	homer__AACAGGAAGT_Ets1-distal	5.13	top3sd	AT1
ETS1	CNOT6L	TRUE	35	homer__AACAGGAAGT_Ets1-distal	5.13	top3sd	AT1
ETS1	CORO1A	TRUE	27	homer__AACAGGAAGT_Ets1-distal	5.13	top3sd	AT1
ETS1	CST7	TRUE	19	homer__AACAGGAAGT_Ets1-distal	5.13	top3sd	AT1
ETS1	CYTIP	TRUE	25	homer__AACAGGAAGT_Ets1-distal	5.13	top3sd	AT1
ETS1	ETS1	TRUE	47	homer__AACAGGAAGT_Ets1-distal	5.13	top3sd	AT1
ETS1	FYN	TRUE	62	homer__AACAGGAAGT_Ets1-distal	5.13	top3sd	AT1
ETS1	HCST	TRUE	23	homer__AACAGGAAGT_Ets1-distal	5.13	top3sd	AT1
ETS1	IL7R	TRUE	21	homer__AACAGGAAGT_Ets1-distal	5.13	top3sd	AT1
ETS1	LCK	TRUE	13	homer__AACAGGAAGT_Ets1-distal	5.13	top3sd	AT1
ETS1	LIMD2	TRUE	30	homer__AACAGGAAGT_Ets1-distal	5.13	top3sd	AT1
ETS1	RAC2	TRUE	26	homer__AACAGGAAGT_Ets1-distal	5.13	top3sd	AT1
ETS1	RGS1	TRUE	30	homer__AACAGGAAGT_Ets1-distal	5.13	top3sd	AT1
ETS1	RUNX3	TRUE	50	homer__AACAGGAAGT_Ets1-distal	5.13	top3sd	AT1
ETS1	SYTL3	TRUE	34	homer__AACAGGAAGT_Ets1-distal	5.13	top3sd	AT1
ETS1	GZMA	TRUE	5	tfdimers__MD00009	4.35	top3sd	AT1
ETS1	IL2RG	TRUE	10	tfdimers__MD00009	4.35	top3sd	AT1
ETS1	NKG7	TRUE	10	tfdimers__MD00009	4.35	top3sd	AT1
ETS1	ANXA7	TRUE	8	transfac_pro__M04703	4.21	w0.005	AT1
ETS1	CACYBP	TRUE	26	transfac_pro__M04703	4.21	w0.005	AT1
ETS1	COX11	TRUE	25	transfac_pro__M04703	4.21	w0.005	AT1
ETS1	DDX3X	TRUE	28	transfac_pro__M04703	4.21	w0.005	AT1
ETS1	EIF5	TRUE	26	transfac_pro__M04703	4.21	w0.005	AT1
ETS1	EMD	TRUE	16	transfac_pro__M04703	4.21	w0.005	AT1
ETS1	FAM135A	TRUE	26	transfac_pro__M04703	4.21	w0.005	AT1
ETS1	FUS	TRUE	23	transfac_pro__M04703	4.21	w0.005	AT1
ETS1	GORASP2	TRUE	15	transfac_pro__M04703	4.21	w0.005	AT1
ETS1	GPBP1	TRUE	39	transfac_pro__M04703	4.21	w0.005	AT1
ETS1	GPR65	TRUE	52	transfac_pro__M04703	4.21	w0.005	AT1
ETS1	HEXIM1	TRUE	10	transfac_pro__M04703	4.21	w0.005	AT1
ETS1	HMGXB3	TRUE	16	transfac_pro__M04703	4.21	w0.005	AT1
ETS1	HSPA8	TRUE	28	transfac_pro__M04703	4.21	w0.005	AT1
ETS1	HSPH1	TRUE	38	transfac_pro__M04703	4.21	w0.005	AT1
ETS1	HUWE1	TRUE	26	transfac_pro__M04703	4.21	w0.005	AT1
ETS1	NPM1	TRUE	30	transfac_pro__M04703	4.21	w0.005	AT1
ETS1	NR4A3	TRUE	27	transfac_pro__M04703	4.21	w0.005	AT1
ETS1	ODC1	TRUE	16	transfac_pro__M04703	4.21	w0.005	AT1
ETS1	POLR2B	TRUE	23	transfac_pro__M04703	4.21	w0.005	AT1
ETS1	PPP1R10	TRUE	15	transfac_pro__M04703	4.21	w0.005	AT1
ETS1	PPP1R2	TRUE	32	transfac_pro__M04703	4.21	w0.005	AT1
ETS1	PPP3CA	TRUE	26	transfac_pro__M04703	4.21	w0.005	AT1
ETS1	PTMA	TRUE	43	transfac_pro__M04703	4.21	w0.005	AT1
ETS1	RPL10A	TRUE	27	transfac_pro__M04703	4.21	w0.005	AT1
ETS1	RPL12	TRUE	37	transfac_pro__M04703	4.21	w0.005	AT1
ETS1	RPL17	TRUE	43	transfac_pro__M04703	4.21	w0.005	AT1
ETS1	RPL27A	TRUE	49	transfac_pro__M04703	4.21	w0.005	AT1
ETS1	RPS15A	TRUE	28	transfac_pro__M04703	4.21	w0.005	AT1
ETS1	RPS28	TRUE	27	transfac_pro__M04703	4.21	w0.005	AT1
ETS1	RPS7	TRUE	54	transfac_pro__M04703	4.21	w0.005	AT1
ETS1	SEMA4A	TRUE	4	transfac_pro__M04703	4.21	w0.005	AT1
ETS1	SRSF5	TRUE	27	transfac_pro__M04703	4.21	w0.005	AT1
ETS1	TLE4	TRUE	27	transfac_pro__M04703	4.21	w0.005	AT1
ETS1	TTC14	TRUE	26	transfac_pro__M04703	4.21	w0.005	AT1
ETS1	USP47	TRUE	26	transfac_pro__M04703	4.21	w0.005	AT1
ETS1	ZFC3H1	TRUE	27	transfac_pro__M04703	4.21	w0.005	AT1
ETS1	ARHGDIB	TRUE	43	homer__ACAGGAAGTG_ETS1	4.05	top50perTarget	AT1
ETS1	ARID5A	TRUE	25	homer__ACAGGAAGTG_ETS1	4.05	top50perTarget	AT1
ETS1	BATF	TRUE	13	homer__ACAGGAAGTG_ETS1	4.05	top50perTarget	AT1
ETS1	BCL3	TRUE	18	homer__ACAGGAAGTG_ETS1	4.05	top50perTarget	AT1
ETS1	C12orf75	TRUE	33	homer__ACAGGAAGTG_ETS1	4.05	top50perTarget	AT1
ETS1	CCL4	TRUE	13	homer__ACAGGAAGTG_ETS1	4.05	top50perTarget	AT1
ETS1	CD37	TRUE	27	homer__ACAGGAAGTG_ETS1	4.05	top50perTarget	AT1
ETS1	CD69	TRUE	24	homer__ACAGGAAGTG_ETS1	4.05	top50perTarget	AT1
ETS1	COTL1	TRUE	5	homer__ACAGGAAGTG_ETS1	4.05	top50perTarget	AT1
ETS1	CREM	TRUE	34	homer__ACAGGAAGTG_ETS1	4.05	top50perTarget	AT1
ETS1	CYBA	TRUE	18	homer__ACAGGAAGTG_ETS1	4.05	top50perTarget	AT1
ETS1	DNAJB6	TRUE	34	homer__ACAGGAAGTG_ETS1	4.05	top50perTarget	AT1
ETS1	DUSP5	TRUE	44	homer__ACAGGAAGTG_ETS1	4.05	top50perTarget	AT1
ETS1	EMP3	TRUE	11	homer__ACAGGAAGTG_ETS1	4.05	top50perTarget	AT1
ETS1	FAM46C	TRUE	32	homer__ACAGGAAGTG_ETS1	4.05	top50perTarget	AT1
ETS1	FXYD5	TRUE	28	homer__ACAGGAAGTG_ETS1	4.05	top50perTarget	AT1
ETS1	GRASP	TRUE	8	homer__ACAGGAAGTG_ETS1	4.05	top50perTarget	AT1
ETS1	GYPC	TRUE	28	homer__ACAGGAAGTG_ETS1	4.05	top50perTarget	AT1
ETS1	GZMK	TRUE	18	homer__ACAGGAAGTG_ETS1	4.05	top50perTarget	AT1
ETS1	IDI1	TRUE	18	homer__ACAGGAAGTG_ETS1	4.05	top50perTarget	AT1
ETS1	IER5	TRUE	4	homer__ACAGGAAGTG_ETS1	4.05	top50perTarget	AT1
ETS1	IFI16	TRUE	13	homer__ACAGGAAGTG_ETS1	4.05	top50perTarget	AT1
ETS1	IRF1	TRUE	26	homer__ACAGGAAGTG_ETS1	4.05	top50perTarget	AT1
ETS1	JUNB	TRUE	43	homer__ACAGGAAGTG_ETS1	4.05	top50perTarget	AT1
ETS1	KDM6B	TRUE	45	homer__ACAGGAAGTG_ETS1	4.05	top50perTarget	AT1
ETS1	LEPROTL1	TRUE	11	homer__ACAGGAAGTG_ETS1	4.05	top50perTarget	AT1
ETS1	LSP1	TRUE	41	homer__ACAGGAAGTG_ETS1	4.05	top50perTarget	AT1
ETS1	NACA	TRUE	26	homer__ACAGGAAGTG_ETS1	4.05	top50perTarget	AT1
ETS1	NR4A2	TRUE	39	homer__ACAGGAAGTG_ETS1	4.05	top50perTarget	AT1
ETS1	PABPC1	TRUE	12	homer__ACAGGAAGTG_ETS1	4.05	top50perTarget	AT1
ETS1	PCSK7	TRUE	10	homer__ACAGGAAGTG_ETS1	4.05	top50perTarget	AT1
ETS1	PFN1	TRUE	28	homer__ACAGGAAGTG_ETS1	4.05	top50perTarget	AT1
ETS1	PRF1	TRUE	7	homer__ACAGGAAGTG_ETS1	4.05	top50perTarget	AT1
ETS1	PTPRC	TRUE	22	homer__ACAGGAAGTG_ETS1	4.05	top50perTarget	AT1
ETS1	QSOX1	TRUE	15	homer__ACAGGAAGTG_ETS1	4.05	top50perTarget	AT1
ETS1	RALGDS	TRUE	21	homer__ACAGGAAGTG_ETS1	4.05	top50perTarget	AT1
ETS1	RBM38	TRUE	7	homer__ACAGGAAGTG_ETS1	4.05	top50perTarget	AT1
ETS1	RPL32	TRUE	43	homer__ACAGGAAGTG_ETS1	4.05	top50perTarget	AT1
ETS1	RPL37	TRUE	25	homer__ACAGGAAGTG_ETS1	4.05	top50perTarget	AT1
ETS1	RPL6	TRUE	30	homer__ACAGGAAGTG_ETS1	4.05	top50perTarget	AT1
ETS1	RPS13	TRUE	28	homer__ACAGGAAGTG_ETS1	4.05	top50perTarget	AT1
ETS1	RPS21	TRUE	33	homer__ACAGGAAGTG_ETS1	4.05	top50perTarget	AT1
ETS1	RPS27	TRUE	36	homer__ACAGGAAGTG_ETS1	4.05	top50perTarget	AT1
ETS1	RPS27A	TRUE	32	homer__ACAGGAAGTG_ETS1	4.05	top50perTarget	AT1
ETS1	SAMSN1	TRUE	33	homer__ACAGGAAGTG_ETS1	4.05	top50perTarget	AT1
ETS1	SELK	TRUE	33	homer__ACAGGAAGTG_ETS1	4.05	top50perTarget	AT1
ETS1	SF1	TRUE	36	homer__ACAGGAAGTG_ETS1	4.05	top50perTarget	AT1
ETS1	SKIL	TRUE	37	homer__ACAGGAAGTG_ETS1	4.05	top50perTarget	AT1
ETS1	SLC38A1	TRUE	28	homer__ACAGGAAGTG_ETS1	4.05	top50perTarget	AT1
ETS1	SOCS1	TRUE	8	homer__ACAGGAAGTG_ETS1	4.05	top50perTarget	AT1
ETS1	SRGN	TRUE	19	homer__ACAGGAAGTG_ETS1	4.05	top50perTarget	AT1
ETS1	STK4	TRUE	30	homer__ACAGGAAGTG_ETS1	4.05	top50perTarget	AT1
ETS1	SUB1	TRUE	41	homer__ACAGGAAGTG_ETS1	4.05	top50perTarget	AT1
ETS1	TCF7	TRUE	36	homer__ACAGGAAGTG_ETS1	4.05	top50perTarget	AT1
ETS1	TNFRSF1B	TRUE	4	homer__ACAGGAAGTG_ETS1	4.05	top50perTarget	AT1
ETS1	TXNIP	TRUE	26	homer__ACAGGAAGTG_ETS1	4.05	top50perTarget	AT1
ETS1	YPEL5	TRUE	7	homer__ACAGGAAGTG_ETS1	4.05	top50perTarget	AT1
ETS1	ARL4A	TRUE	10	transfac_pro__M07211	4	top50perTarget	AT1
ETS1	BCAS2	TRUE	5	transfac_pro__M07211	4	top50perTarget	AT1
ETS1	C12orf57	TRUE	19	transfac_pro__M07211	4	top50perTarget	AT1
ETS1	CD3D	TRUE	3	transfac_pro__M07211	4	top50perTarget	AT1
ETS1	CD3E	TRUE	8	transfac_pro__M07211	4	top50perTarget	AT1
ETS1	CD52	TRUE	6	transfac_pro__M07211	4	top50perTarget	AT1
ETS1	COMMD6	TRUE	14	transfac_pro__M07211	4	top50perTarget	AT1
ETS1	GMFG	TRUE	19	transfac_pro__M07211	4	top50perTarget	AT1
ETS1	IFITM1	TRUE	5	transfac_pro__M07211	4	top50perTarget	AT1
ETS1	ITM2A	TRUE	8	transfac_pro__M07211	4	top50perTarget	AT1
ETS1	KLRB1	TRUE	7	transfac_pro__M07211	4	top50perTarget	AT1
ETS1	LTB	TRUE	19	transfac_pro__M07211	4	top50perTarget	AT1
ETS1	MARCKSL1	TRUE	14	transfac_pro__M07211	4	top50perTarget	AT1
ETS1	MT1X	TRUE	4	transfac_pro__M07211	4	top50perTarget	AT1
ETS1	PTPRCAP	TRUE	11	transfac_pro__M07211	4	top50perTarget	AT1
ETS1	RGS10	TRUE	11	transfac_pro__M07211	4	top50perTarget	AT1
ETS1	RPL10	TRUE	22	transfac_pro__M07211	4	top50perTarget	AT1
ETS1	RPL28	TRUE	45	transfac_pro__M07211	4	top50perTarget	AT1
ETS1	RPL30	TRUE	9	transfac_pro__M07211	4	top50perTarget	AT1
ETS1	RPL34	TRUE	22	transfac_pro__M07211	4	top50perTarget	AT1
ETS1	RPL41	TRUE	15	transfac_pro__M07211	4	top50perTarget	AT1
ETS1	RPLP2	TRUE	20	transfac_pro__M07211	4	top50perTarget	AT1
ETS1	RPS26	TRUE	22	transfac_pro__M07211	4	top50perTarget	AT1
ETS1	SH2D2A	TRUE	19	transfac_pro__M07211	4	top50perTarget	AT1
ETS1	SLC7A5	TRUE	23	transfac_pro__M07211	4	top50perTarget	AT1
ETS1	TGFB1	TRUE	17	transfac_pro__M07211	4	top50perTarget	AT1
ETS1	TSC22D3	TRUE	22	transfac_pro__M07211	4	top50perTarget	AT1
ETS1	TSPYL2	TRUE	3	transfac_pro__M07211	4	top50perTarget	AT1
ETS1	VIM	TRUE	14	transfac_pro__M07211	4	top50perTarget	AT1
ETS1	ATP5G2	TRUE	5	cisbp__M1922	3.9	top50perTarget	AT1
ETS1	DUSP2	TRUE	4	cisbp__M1922	3.9	top50perTarget	AT1
ETS1	PDCD4	TRUE	9	cisbp__M1922	3.9	top50perTarget	AT1
ETS1	RPL22	TRUE	6	cisbp__M1922	3.9	top50perTarget	AT1
ETS1	RPL29	TRUE	14	cisbp__M1922	3.9	top50perTarget	AT1
ETS1	RPL5	TRUE	2	cisbp__M1922	3.9	top50perTarget	AT1
ETS1	SEPTIN6	TRUE	7	cisbp__M1922	3.9	top50perTarget	AT1
ETS1	ARPC5L	TRUE	3	hdpi__ETS1	3.55	w0.005	AT1
ETS1	B4GALT1	TRUE	1	hdpi__ETS1	3.55	w0.005	AT1
ETS1	BCL2A1	TRUE	3	hdpi__ETS1	3.55	w0.005	AT1
ETS1	CCL2	TRUE	2	hdpi__ETS1	3.55	w0.005	AT1
ETS1	CCL20	TRUE	1	hdpi__ETS1	3.55	w0.005	AT1
ETS1	CD74	TRUE	1	hdpi__ETS1	3.55	w0.005	AT1
ETS1	EPS15	TRUE	1	hdpi__ETS1	3.55	w0.005	AT1
ETS1	FLII	TRUE	1	hdpi__ETS1	3.55	w0.005	AT1
ETS1	GOLGA3	TRUE	3	hdpi__ETS1	3.55	w0.005	AT1
ETS1	HLA-DRA	TRUE	1	hdpi__ETS1	3.55	w0.005	AT1
ETS1	ITGAV	TRUE	2	hdpi__ETS1	3.55	w0.005	AT1
ETS1	LYN	TRUE	7	hdpi__ETS1	3.55	w0.005	AT1
ETS1	PER1	TRUE	2	hdpi__ETS1	3.55	w0.005	AT1
ETS1	PER2	TRUE	5	hdpi__ETS1	3.55	w0.005	AT1
ETS1	PMAIP1	TRUE	7	hdpi__ETS1	3.55	w0.005	AT1
ETS1	REL	TRUE	19	hdpi__ETS1	3.55	w0.005	AT1
ETS1	RPS14	TRUE	29	hdpi__ETS1	3.55	w0.005	AT1
ETS1	RPS5	TRUE	22	hdpi__ETS1	3.55	w0.005	AT1
ETS1	SOX9	TRUE	33	hdpi__ETS1	3.55	w0.005	AT1
ETS1	SPRED2	TRUE	8	hdpi__ETS1	3.55	w0.005	AT1
ETS1	TPT1	TRUE	2	hdpi__ETS1	3.55	w0.005	AT1
ETS1	TRIM44	TRUE	1	hdpi__ETS1	3.55	w0.005	AT1
ETS1	TRIO	TRUE	13	hdpi__ETS1	3.55	w0.005	AT1
ETS1	UBE4A	TRUE	2	hdpi__ETS1	3.55	w0.005	AT1
ETS1	UBR4	TRUE	1	hdpi__ETS1	3.55	w0.005	AT1
ETS1	VPS37B	TRUE	5	hdpi__ETS1	3.55	w0.005	AT1
ETS1	YWHAZ	TRUE	8	hdpi__ETS1	3.55	w0.005	AT1
ETS1	ZRANB2	TRUE	3	hdpi__ETS1	3.55	w0.005	AT1
ETS1	BTG1	TRUE	16	hocomoco__ETS1_HUMAN.H11MO.0.A	3.48	top50perTarget	AT1
ETS1	EEF1A1	TRUE	7	hocomoco__ETS1_HUMAN.H11MO.0.A	3.48	top50perTarget	AT1
ETS1	EEF1B2	TRUE	17	hocomoco__ETS1_HUMAN.H11MO.0.A	3.48	top50perTarget	AT1
ETS1	RHOH	TRUE	28	hocomoco__ETS1_HUMAN.H11MO.0.A	3.48	top50perTarget	AT1
ETS1	RPS16	TRUE	27	hocomoco__ETS1_HUMAN.H11MO.0.A	3.48	top50perTarget	AT1
ETS1	RPS3	TRUE	4	hocomoco__ETS1_HUMAN.H11MO.0.A	3.48	top50perTarget	AT1
ETS1	RPS4X	TRUE	35	hocomoco__ETS1_HUMAN.H11MO.0.A	3.48	top50perTarget	AT1
ETS1	TMEM66	TRUE	4	hocomoco__ETS1_HUMAN.H11MO.0.A	3.48	top50perTarget	AT1
ETS1	TNFAIP3	TRUE	5	hocomoco__ETS1_HUMAN.H11MO.0.A	3.48	top50perTarget	AT1
ETS1	DDIT4	TRUE	16	cisbp__M0707	3.22	top50perTarget	AT1
ETS1	ID2	TRUE	21	cisbp__M0707	3.22	top50perTarget	AT1
ETS1	INTS6	TRUE	10	cisbp__M0707	3.22	top50perTarget	AT1
ETS1	MCM3AP	TRUE	15	cisbp__M0707	3.22	top50perTarget	AT1
ETS1	SLA	TRUE	11	cisbp__M0707	3.22	top50perTarget	AT1
ETS1	GPR183	TRUE	9	tfdimers__MD00044	3.2	top1sd	AT1
ETS1	CXCR4	TRUE	26	tfdimers__MD00012	3.09	top1sd	AT1
ETS1	ZFP36L2	TRUE	4	tfdimers__MD00012	3.09	top1sd	AT1
ETS1	CD2	TRUE	3	tfdimers__MD00398	3.07	top1sd	AT1
ETS1	GZMH	TRUE	1	tfdimers__MD00398	3.07	top1sd	AT1
ETS1	SH3BGRL3	TRUE	2	tfdimers__MD00398	3.07	top1sd	AT1
ETS1	SPON2	TRUE	1	tfdimers__MD00398	3.07	top1sd	AT1
FOS	ANXA1	TRUE	130	hocomoco__FOS_HUMAN.H11MO.0.A	6.14	top1sd	AT1
FOS	ATF3	TRUE	366	hocomoco__FOS_HUMAN.H11MO.0.A	6.14	top1sd	AT1
FOS	CSRNP1	TRUE	98	hocomoco__FOS_HUMAN.H11MO.0.A	6.14	top1sd	AT1
FOS	FOSB	TRUE	315	hocomoco__FOS_HUMAN.H11MO.0.A	6.14	top1sd	AT1
FOS	H3F3B	TRUE	141	hocomoco__FOS_HUMAN.H11MO.0.A	6.14	top1sd	AT1
FOS	HBEGF	TRUE	81	hocomoco__FOS_HUMAN.H11MO.0.A	6.14	top1sd	AT1
FOS	IFRD1	TRUE	70	hocomoco__FOS_HUMAN.H11MO.0.A	6.14	top1sd	AT1
FOS	JUNB	TRUE	183	hocomoco__FOS_HUMAN.H11MO.0.A	6.14	top1sd	AT1
FOS	SERTAD1	TRUE	100	hocomoco__FOS_HUMAN.H11MO.0.A	6.14	top1sd	AT1
FOS	UBC	TRUE	256	hocomoco__FOS_HUMAN.H11MO.0.A	6.14	top1sd	AT1
FOS	WEE1	TRUE	73	hocomoco__FOS_HUMAN.H11MO.0.A	6.14	top1sd	AT1
FOS	ZFP36	TRUE	97	hocomoco__FOS_HUMAN.H11MO.0.A	6.14	top1sd	AT1
FOS	DUSP1	TRUE	339	swissregulon__hs__FOS_FOS_B_L1__JUN_B_D_.p2	5.91	top1sd	AT1
FOS	KLF6	TRUE	300	hocomoco__FOS_MOUSE.H11MO.0.A	5.78	top50	AT1
FOS	HSPB1	TRUE	13	stark__TGANTCA	5.14	top1sd	AT1
FOS	SRSF7	TRUE	7	stark__TGANTCA	5.14	top1sd	AT1
FOS	GADD45B	TRUE	21	transfac_pro__M08946	3.9	top1sd	AT1
FOS	DNAJB1	TRUE	13	transfac_public__M00517	3.69	top50	AT1
FOS	FOS	TRUE	167	taipale_cyt_meth__FOS_NRTGAYGTCAYN_eDBD_meth	3.6	top3sd	AT1
FOS	JUN	TRUE	238	taipale_cyt_meth__FOS_NRTGAYGTCAYN_eDBD_meth	3.6	top3sd	AT1
FOS	JUND	TRUE	237	taipale_cyt_meth__FOS_NRTGAYGTCAYN_eDBD_meth	3.6	top3sd	AT1
FOS	PPP1R15A	TRUE	212	taipale_cyt_meth__FOS_NRTGAYGTCAYN_eDBD_meth	3.6	top3sd	AT1
FOS	IER2	TRUE	92	transfac_pro__M07686	3.47	top3sd	AT1
FOS	BRD2	TRUE	15	dbcorrdb__FOS__ENCSR000EYZ_1__m1	3.14	top10perTarget	AT1
FOS	DEDD2	TRUE	3	dbcorrdb__FOS__ENCSR000EYZ_1__m1	3.14	top10perTarget	AT1
FOS	EIF5	TRUE	4	dbcorrdb__FOS__ENCSR000EYZ_1__m1	3.14	top10perTarget	AT1
FOS	HERPUD1	TRUE	1	dbcorrdb__FOS__ENCSR000EYZ_1__m1	3.14	top10perTarget	AT1
FOS	HES1	TRUE	15	dbcorrdb__FOS__ENCSR000EYZ_1__m1	3.14	top10perTarget	AT1
FOS	HEXIM1	TRUE	11	dbcorrdb__FOS__ENCSR000EYZ_1__m1	3.14	top10perTarget	AT1
FOS	HNRNPL	TRUE	5	dbcorrdb__FOS__ENCSR000EYZ_1__m1	3.14	top10perTarget	AT1
FOS	HSPA1A	TRUE	78	dbcorrdb__FOS__ENCSR000EYZ_1__m1	3.14	top10perTarget	AT1
FOS	HSPA8	TRUE	8	dbcorrdb__FOS__ENCSR000EYZ_1__m1	3.14	top10perTarget	AT1
FOS	HSPH1	TRUE	12	dbcorrdb__FOS__ENCSR000EYZ_1__m1	3.14	top10perTarget	AT1
FOS	ID4	TRUE	14	dbcorrdb__FOS__ENCSR000EYZ_1__m1	3.14	top10perTarget	AT1
FOS	IER5L	TRUE	6	dbcorrdb__FOS__ENCSR000EYZ_1__m1	3.14	top10perTarget	AT1
FOS	KLF10	TRUE	4	dbcorrdb__FOS__ENCSR000EYZ_1__m1	3.14	top10perTarget	AT1
FOS	KLF9	TRUE	9	dbcorrdb__FOS__ENCSR000EYZ_1__m1	3.14	top10perTarget	AT1
FOS	PCF11	TRUE	11	dbcorrdb__FOS__ENCSR000EYZ_1__m1	3.14	top10perTarget	AT1
FOS	PER1	TRUE	9	dbcorrdb__FOS__ENCSR000EYZ_1__m1	3.14	top10perTarget	AT1
FOS	PNRC1	TRUE	8	dbcorrdb__FOS__ENCSR000EYZ_1__m1	3.14	top10perTarget	AT1
FOS	PPP1R10	TRUE	14	dbcorrdb__FOS__ENCSR000EYZ_1__m1	3.14	top10perTarget	AT1
FOS	PTMA	TRUE	3	dbcorrdb__FOS__ENCSR000EYZ_1__m1	3.14	top10perTarget	AT1
FOS	RGS16	TRUE	7	dbcorrdb__FOS__ENCSR000EYZ_1__m1	3.14	top10perTarget	AT1
FOS	RHOB	TRUE	45	dbcorrdb__FOS__ENCSR000EYZ_1__m1	3.14	top10perTarget	AT1
FOS	RUNX1	TRUE	4	dbcorrdb__FOS__ENCSR000EYZ_1__m1	3.14	top10perTarget	AT1
FOS	SERTAD3	TRUE	10	dbcorrdb__FOS__ENCSR000EYZ_1__m1	3.14	top10perTarget	AT1
FOS	SLC25A25	TRUE	15	dbcorrdb__FOS__ENCSR000EYZ_1__m1	3.14	top10perTarget	AT1
FOS	SLC30A1	TRUE	2	dbcorrdb__FOS__ENCSR000EYZ_1__m1	3.14	top10perTarget	AT1
FOS	SOX4	TRUE	14	dbcorrdb__FOS__ENCSR000EYZ_1__m1	3.14	top10perTarget	AT1
FOS	SRF	TRUE	7	dbcorrdb__FOS__ENCSR000EYZ_1__m1	3.14	top10perTarget	AT1
FOS	SRSF6	TRUE	14	dbcorrdb__FOS__ENCSR000EYZ_1__m1	3.14	top10perTarget	AT1
FOS	TLE4	TRUE	14	dbcorrdb__FOS__ENCSR000EYZ_1__m1	3.14	top10perTarget	AT1
FOS	TOB1	TRUE	13	dbcorrdb__FOS__ENCSR000EYZ_1__m1	3.14	top10perTarget	AT1
FOS	TOB2	TRUE	5	dbcorrdb__FOS__ENCSR000EYZ_1__m1	3.14	top10perTarget	AT1
FOS	TRIB1	TRUE	22	dbcorrdb__FOS__ENCSR000EYZ_1__m1	3.14	top10perTarget	AT1
FOS	TSC22D1	TRUE	10	dbcorrdb__FOS__ENCSR000EYZ_1__m1	3.14	top10perTarget	AT1
FOS	UBB	TRUE	10	dbcorrdb__FOS__ENCSR000EYZ_1__m1	3.14	top10perTarget	AT1
FOSB	ANXA1	TRUE	164	transfac_pro__M08936	6.98	top50	AT1
FOSB	ATF3	TRUE	399	transfac_pro__M08936	6.98	top50	AT1
FOSB	CLDN4	TRUE	114	transfac_pro__M08936	6.98	top50	AT1
FOSB	CSRNP1	TRUE	108	transfac_pro__M08936	6.98	top50	AT1
FOSB	DUSP1	TRUE	370	transfac_pro__M08936	6.98	top50	AT1
FOSB	FOSB	TRUE	318	transfac_pro__M08936	6.98	top50	AT1
FOSB	GADD45B	TRUE	19	transfac_pro__M08936	6.98	top50	AT1
FOSB	HBEGF	TRUE	142	transfac_pro__M08936	6.98	top50	AT1
FOSB	JUNB	TRUE	211	transfac_pro__M08936	6.98	top50	AT1
FOSB	KLF6	TRUE	329	transfac_pro__M08936	6.98	top50	AT1
FOSB	LDLR	TRUE	138	transfac_pro__M08936	6.98	top50	AT1
FOSB	LMNA	TRUE	156	transfac_pro__M08936	6.98	top50	AT1
FOSB	SERTAD1	TRUE	69	transfac_pro__M08936	6.98	top50	AT1
FOSB	UBC	TRUE	264	transfac_pro__M08936	6.98	top50	AT1
FOSB	WEE1	TRUE	251	transfac_pro__M08936	6.98	top50	AT1
FOSB	ZFP36	TRUE	106	transfac_pro__M08936	6.98	top50	AT1
FOSB	MT2A	TRUE	16	swissregulon__hs__FOS_FOS_B_L1__JUN_B_D_.p2	6.67	top50	AT1
FOSB	TRIB1	TRUE	53	swissregulon__hs__FOS_FOS_B_L1__JUN_B_D_.p2	6.67	top50	AT1
FOSB	HSPB1	TRUE	7	stark__TGANTCA	5.51	top50	AT1
FOSB	DNAJB1	TRUE	29	transfac_public__M00517	4.72	top50	AT1
FOSB	PTGS2	TRUE	5	transfac_public__M00517	4.72	top50	AT1
FOSB	AHR	TRUE	131	taipale_cyt_meth__FOSB_NRTGAYGTCAYN_eDBD_meth	4.15	top3sd	AT1
FOSB	CYR61	TRUE	126	taipale_cyt_meth__FOSB_NRTGAYGTCAYN_eDBD_meth	4.15	top3sd	AT1
FOSB	EGR1	TRUE	128	taipale_cyt_meth__FOSB_NRTGAYGTCAYN_eDBD_meth	4.15	top3sd	AT1
FOSB	ERF	TRUE	196	taipale_cyt_meth__FOSB_NRTGAYGTCAYN_eDBD_meth	4.15	top3sd	AT1
FOSB	FOS	TRUE	209	taipale_cyt_meth__FOSB_NRTGAYGTCAYN_eDBD_meth	4.15	top3sd	AT1
FOSB	JUN	TRUE	247	taipale_cyt_meth__FOSB_NRTGAYGTCAYN_eDBD_meth	4.15	top3sd	AT1
FOSB	JUND	TRUE	258	taipale_cyt_meth__FOSB_NRTGAYGTCAYN_eDBD_meth	4.15	top3sd	AT1
FOSB	MAFF	TRUE	222	taipale_cyt_meth__FOSB_NRTGAYGTCAYN_eDBD_meth	4.15	top3sd	AT1
FOSB	MCL1	TRUE	114	taipale_cyt_meth__FOSB_NRTGAYGTCAYN_eDBD_meth	4.15	top3sd	AT1
FOSB	MYADM	TRUE	131	taipale_cyt_meth__FOSB_NRTGAYGTCAYN_eDBD_meth	4.15	top3sd	AT1
FOSB	PPP1R15A	TRUE	249	taipale_cyt_meth__FOSB_NRTGAYGTCAYN_eDBD_meth	4.15	top3sd	AT1
FOSB	RCAN1	TRUE	252	taipale_cyt_meth__FOSB_NRTGAYGTCAYN_eDBD_meth	4.15	top3sd	AT1
FOSB	SEMA4A	TRUE	86	taipale_cyt_meth__FOSB_NRTGAYGTCAYN_eDBD_meth	4.15	top3sd	AT1
FOSB	ZFP36L1	TRUE	210	taipale_cyt_meth__FOSB_NRTGAYGTCAYN_eDBD_meth	4.15	top3sd	AT1
FOSB	CCNL1	TRUE	131	transfac_pro__M08937	3.95	top3sd	AT1
FOSB	IER2	TRUE	98	transfac_pro__M08937	3.95	top3sd	AT1
FOSB	ERRFI1	TRUE	118	transfac_pro__M08937	3.91	top3sd	AT1
FOSB	DNAJB4	TRUE	15	cisbp__M6228	3.71	top1sd	AT1
FOSB	IFRD1	TRUE	18	cisbp__M6228	3.71	top1sd	AT1
FOSB	KDM6B	TRUE	58	cisbp__M6228	3.71	top1sd	AT1
FOSB	SLC38A2	TRUE	11	cisbp__M6228	3.71	top1sd	AT1
FOSB	TES	TRUE	54	cisbp__M6228	3.71	top1sd	AT1
FOSB	VPS37B	TRUE	64	cisbp__M6228	3.71	top1sd	AT1
FOSB	BRD2	TRUE	57	transfac_pro__M07686	3.24	top1sd	AT1
FOSB	KLF9	TRUE	54	transfac_pro__M07686	3.24	top1sd	AT1
FOSB	TSC22D2	TRUE	51	transfac_pro__M07686	3.24	top1sd	AT1
FOSB	UBB	TRUE	36	transfac_pro__M07686	3.24	top1sd	AT1
FOSB	GOLGA8A	TRUE	33	taipale_cyt_meth__FOSB_NRTGACGTCAYN_eDBD	3.04	top1sd	AT1
FOSB	RRAD	TRUE	24	taipale_cyt_meth__FOSB_NRTGACGTCAYN_eDBD	3.04	top1sd	AT1
FOSB	TRA2B	TRUE	28	taipale_cyt_meth__FOSB_NRTGACGTCAYN_eDBD	3.04	top1sd	AT1
FOSL1	BCL3	TRUE	103	transfac_public__M00517	5.97	top50Andtop1sd	AT1
FOSL1	CLDN4	TRUE	299	transfac_public__M00517	5.97	top50Andtop1sd	AT1
FOSL1	FOSL1	TRUE	77	transfac_public__M00517	5.97	top50Andtop1sd	AT1
FOSL1	GADD45A	TRUE	89	transfac_public__M00517	5.97	top50Andtop1sd	AT1
FOSL1	ITGA2	TRUE	42	transfac_public__M00517	5.97	top50Andtop1sd	AT1
FOSL1	KDM6B	TRUE	138	transfac_public__M00517	5.97	top50Andtop1sd	AT1
FOSL1	LMNA	TRUE	315	transfac_public__M00517	5.97	top50Andtop1sd	AT1
FOSL1	PER2	TRUE	103	transfac_public__M00517	5.97	top50Andtop1sd	AT1
FOSL1	PTGS2	TRUE	3	transfac_public__M00517	5.97	top50Andtop1sd	AT1
FOSL1	SDC4	TRUE	130	transfac_public__M00517	5.97	top50Andtop1sd	AT1
FOSL1	WEE1	TRUE	101	transfac_public__M00517	5.97	top50Andtop1sd	AT1
FOSL1	IER3	TRUE	31	transfac_pro__M02095	5.74	top50Andtop1sd	AT1
FOSL1	PIM1	TRUE	122	transfac_pro__M02095	5.74	top50Andtop1sd	AT1
FOSL1	RRAD	TRUE	23	transfac_pro__M02095	5.74	top50Andtop1sd	AT1
FOSL1	SFN	TRUE	274	transfac_pro__M02095	5.74	top50Andtop1sd	AT1
FOSL1	CAPN8	TRUE	196	swissregulon__hs__FOS_FOS_B_L1__JUN_B_D_.p2	5.69	top50perTarget	AT1
FOSL1	KLF10	TRUE	150	swissregulon__hs__FOS_FOS_B_L1__JUN_B_D_.p2	5.69	top50perTarget	AT1
FOSL1	PHLDA2	TRUE	200	swissregulon__hs__FOS_FOS_B_L1__JUN_B_D_.p2	5.69	top50perTarget	AT1
FOSL1	TRIB1	TRUE	223	swissregulon__hs__FOS_FOS_B_L1__JUN_B_D_.p2	5.69	top50perTarget	AT1
FOSL1	DUSP7	TRUE	6	swissregulon__hs__FOS_FOS_B_L1__JUN_B_D_.p2	5.6	w0.005	AT1
FOSL1	LAMB3	TRUE	83	swissregulon__hs__FOS_FOS_B_L1__JUN_B_D_.p2	5.6	w0.005	AT1
FOSL1	LDLR	TRUE	95	swissregulon__hs__FOS_FOS_B_L1__JUN_B_D_.p2	5.6	w0.005	AT1
FOSL1	MARCKSL1	TRUE	11	swissregulon__hs__FOS_FOS_B_L1__JUN_B_D_.p2	5.6	w0.005	AT1
FOSL1	RUNX1	TRUE	69	swissregulon__hs__FOS_FOS_B_L1__JUN_B_D_.p2	5.6	w0.005	AT1
FOSL1	SERTAD1	TRUE	64	swissregulon__hs__FOS_FOS_B_L1__JUN_B_D_.p2	5.6	w0.005	AT1
FOSL1	SOX9	TRUE	19	transfac_pro__M01267	5.21	top50Andtop1sd	AT1
FOSL1	KLF4	TRUE	109	transfac_pro__M07685	5.09	top50perTarget	AT1
FOSL1	TGIF1	TRUE	64	dbcorrdb__FOSL1__ENCSR000BMV_1__m1	4.93	top50Andtop1sd	AT1
FOSL1	ARL4A	TRUE	21	stark__TGANTCA	4.55	w0.005	AT1
FOSL1	SLC6A14	TRUE	9	stark__TGANTCA	4.55	w0.005	AT1
FOSL1	TNFAIP3	TRUE	14	stark__TGANTCA	4.55	w0.005	AT1
FOSL1	ACTG1	TRUE	13	cisbp__M4619	4.53	w0.001	AT1
FOSL1	AGPAT2	TRUE	6	cisbp__M4619	4.53	w0.001	AT1
FOSL1	ANXA1	TRUE	34	cisbp__M4619	4.53	w0.001	AT1
FOSL1	ANXA5	TRUE	29	cisbp__M4619	4.53	w0.001	AT1
FOSL1	ARHGDIB	TRUE	23	cisbp__M4619	4.53	w0.001	AT1
FOSL1	ARID5A	TRUE	21	cisbp__M4619	4.53	w0.001	AT1
FOSL1	ATF3	TRUE	37	cisbp__M4619	4.53	w0.001	AT1
FOSL1	B4GALT1	TRUE	4	cisbp__M4619	4.53	w0.001	AT1
FOSL1	BCL9L	TRUE	36	cisbp__M4619	4.53	w0.001	AT1
FOSL1	BRD2	TRUE	25	cisbp__M4619	4.53	w0.001	AT1
FOSL1	CD53	TRUE	18	cisbp__M4619	4.53	w0.001	AT1
FOSL1	CD74	TRUE	4	cisbp__M4619	4.53	w0.001	AT1
FOSL1	CDH1	TRUE	3	cisbp__M4619	4.53	w0.001	AT1
FOSL1	CELF1	TRUE	31	cisbp__M4619	4.53	w0.001	AT1
FOSL1	COTL1	TRUE	19	cisbp__M4619	4.53	w0.001	AT1
FOSL1	CSRNP1	TRUE	31	cisbp__M4619	4.53	w0.001	AT1
FOSL1	CTSB	TRUE	13	cisbp__M4619	4.53	w0.001	AT1
FOSL1	DDIT4	TRUE	5	cisbp__M4619	4.53	w0.001	AT1
FOSL1	DIAPH1	TRUE	23	cisbp__M4619	4.53	w0.001	AT1
FOSL1	DNAJB1	TRUE	7	cisbp__M4619	4.53	w0.001	AT1
FOSL1	DSP	TRUE	9	cisbp__M4619	4.53	w0.001	AT1
FOSL1	DUSP2	TRUE	9	cisbp__M4619	4.53	w0.001	AT1
FOSL1	DUSP5	TRUE	96	cisbp__M4619	4.53	w0.001	AT1
FOSL1	DYNLL1	TRUE	15	cisbp__M4619	4.53	w0.001	AT1
FOSL1	EEF1A1	TRUE	16	cisbp__M4619	4.53	w0.001	AT1
FOSL1	EIF4G1	TRUE	10	cisbp__M4619	4.53	w0.001	AT1
FOSL1	EIF5	TRUE	36	cisbp__M4619	4.53	w0.001	AT1
FOSL1	EMP3	TRUE	33	cisbp__M4619	4.53	w0.001	AT1
FOSL1	ENO1	TRUE	20	cisbp__M4619	4.53	w0.001	AT1
FOSL1	EREG	TRUE	24	cisbp__M4619	4.53	w0.001	AT1
FOSL1	ETS1	TRUE	30	cisbp__M4619	4.53	w0.001	AT1
FOSL1	F3	TRUE	29	cisbp__M4619	4.53	w0.001	AT1
FOSL1	FAM135A	TRUE	42	cisbp__M4619	4.53	w0.001	AT1
FOSL1	FAM46C	TRUE	11	cisbp__M4619	4.53	w0.001	AT1
FOSL1	FOSB	TRUE	19	cisbp__M4619	4.53	w0.001	AT1
FOSL1	FYN	TRUE	17	cisbp__M4619	4.53	w0.001	AT1
FOSL1	GABARAPL1	TRUE	13	cisbp__M4619	4.53	w0.001	AT1
FOSL1	GADD45B	TRUE	23	cisbp__M4619	4.53	w0.001	AT1
FOSL1	GNG12	TRUE	19	cisbp__M4619	4.53	w0.001	AT1
FOSL1	GPBP1	TRUE	14	cisbp__M4619	4.53	w0.001	AT1
FOSL1	GPNMB	TRUE	12	cisbp__M4619	4.53	w0.001	AT1
FOSL1	GPX1	TRUE	24	cisbp__M4619	4.53	w0.001	AT1
FOSL1	GRASP	TRUE	14	cisbp__M4619	4.53	w0.001	AT1
FOSL1	H3F3B	TRUE	35	cisbp__M4619	4.53	w0.001	AT1
FOSL1	HBEGF	TRUE	30	cisbp__M4619	4.53	w0.001	AT1
FOSL1	HGS	TRUE	27	cisbp__M4619	4.53	w0.001	AT1
FOSL1	HSP90AB1	TRUE	17	cisbp__M4619	4.53	w0.001	AT1
FOSL1	HSPA8	TRUE	15	cisbp__M4619	4.53	w0.001	AT1
FOSL1	IFRD1	TRUE	34	cisbp__M4619	4.53	w0.001	AT1
FOSL1	IL7R	TRUE	32	cisbp__M4619	4.53	w0.001	AT1
FOSL1	IMPAD1	TRUE	10	cisbp__M4619	4.53	w0.001	AT1
FOSL1	INSIG1	TRUE	31	cisbp__M4619	4.53	w0.001	AT1
FOSL1	IRF1	TRUE	13	cisbp__M4619	4.53	w0.001	AT1
FOSL1	ISG20	TRUE	27	cisbp__M4619	4.53	w0.001	AT1
FOSL1	ITPRIPL2	TRUE	24	cisbp__M4619	4.53	w0.001	AT1
FOSL1	ITSN2	TRUE	17	cisbp__M4619	4.53	w0.001	AT1
FOSL1	JUNB	TRUE	36	cisbp__M4619	4.53	w0.001	AT1
FOSL1	KLF6	TRUE	31	cisbp__M4619	4.53	w0.001	AT1
FOSL1	KLF9	TRUE	13	cisbp__M4619	4.53	w0.001	AT1
FOSL1	LSP1	TRUE	31	cisbp__M4619	4.53	w0.001	AT1
FOSL1	MAFF	TRUE	22	cisbp__M4619	4.53	w0.001	AT1
FOSL1	MAP4K3	TRUE	23	cisbp__M4619	4.53	w0.001	AT1
FOSL1	MPZL2	TRUE	11	cisbp__M4619	4.53	w0.001	AT1
FOSL1	MT2A	TRUE	18	cisbp__M4619	4.53	w0.001	AT1
FOSL1	NCEH1	TRUE	29	cisbp__M4619	4.53	w0.001	AT1
FOSL1	NR4A2	TRUE	14	cisbp__M4619	4.53	w0.001	AT1
FOSL1	NR4A3	TRUE	26	cisbp__M4619	4.53	w0.001	AT1
FOSL1	NRP2	TRUE	15	cisbp__M4619	4.53	w0.001	AT1
FOSL1	OSMR	TRUE	9	cisbp__M4619	4.53	w0.001	AT1
FOSL1	PABPC1	TRUE	13	cisbp__M4619	4.53	w0.001	AT1
FOSL1	PFN1	TRUE	24	cisbp__M4619	4.53	w0.001	AT1
FOSL1	PHC2	TRUE	25	cisbp__M4619	4.53	w0.001	AT1
FOSL1	PLK3	TRUE	52	cisbp__M4619	4.53	w0.001	AT1
FOSL1	PPP1R2	TRUE	12	cisbp__M4619	4.53	w0.001	AT1
FOSL1	PSMD11	TRUE	26	cisbp__M4619	4.53	w0.001	AT1
FOSL1	PTMA	TRUE	24	cisbp__M4619	4.53	w0.001	AT1
FOSL1	PTPN12	TRUE	7	cisbp__M4619	4.53	w0.001	AT1
FOSL1	RALGDS	TRUE	37	cisbp__M4619	4.53	w0.001	AT1
FOSL1	RASEF	TRUE	17	cisbp__M4619	4.53	w0.001	AT1
FOSL1	RPL17	TRUE	4	cisbp__M4619	4.53	w0.001	AT1
FOSL1	RPS16	TRUE	7	cisbp__M4619	4.53	w0.001	AT1
FOSL1	RPS20	TRUE	3	cisbp__M4619	4.53	w0.001	AT1
FOSL1	RPS4X	TRUE	14	cisbp__M4619	4.53	w0.001	AT1
FOSL1	RRBP1	TRUE	19	cisbp__M4619	4.53	w0.001	AT1
FOSL1	RUNX3	TRUE	10	cisbp__M4619	4.53	w0.001	AT1
FOSL1	SDCBP	TRUE	26	cisbp__M4619	4.53	w0.001	AT1
FOSL1	SDR16C5	TRUE	21	cisbp__M4619	4.53	w0.001	AT1
FOSL1	SELK	TRUE	9	cisbp__M4619	4.53	w0.001	AT1
FOSL1	SEMA4B	TRUE	19	cisbp__M4619	4.53	w0.001	AT1
FOSL1	SERPINB1	TRUE	22	cisbp__M4619	4.53	w0.001	AT1
FOSL1	SLA	TRUE	24	cisbp__M4619	4.53	w0.001	AT1
FOSL1	SLC25A25	TRUE	31	cisbp__M4619	4.53	w0.001	AT1
FOSL1	SLC38A2	TRUE	29	cisbp__M4619	4.53	w0.001	AT1
FOSL1	SLC39A1	TRUE	23	cisbp__M4619	4.53	w0.001	AT1
FOSL1	SLC7A5	TRUE	4	cisbp__M4619	4.53	w0.001	AT1
FOSL1	SLMAP	TRUE	23	cisbp__M4619	4.53	w0.001	AT1
FOSL1	SPRED2	TRUE	37	cisbp__M4619	4.53	w0.001	AT1
FOSL1	ST14	TRUE	12	cisbp__M4619	4.53	w0.001	AT1
FOSL1	STAT6	TRUE	25	cisbp__M4619	4.53	w0.001	AT1
FOSL1	SURF4	TRUE	31	cisbp__M4619	4.53	w0.001	AT1
FOSL1	SVIL	TRUE	20	cisbp__M4619	4.53	w0.001	AT1
FOSL1	TANC1	TRUE	22	cisbp__M4619	4.53	w0.001	AT1
FOSL1	TCF7	TRUE	10	cisbp__M4619	4.53	w0.001	AT1
FOSL1	TES	TRUE	34	cisbp__M4619	4.53	w0.001	AT1
FOSL1	TLE4	TRUE	6	cisbp__M4619	4.53	w0.001	AT1
FOSL1	TMEM106B	TRUE	13	cisbp__M4619	4.53	w0.001	AT1
FOSL1	TNFRSF1B	TRUE	24	cisbp__M4619	4.53	w0.001	AT1
FOSL1	TNIP1	TRUE	11	cisbp__M4619	4.53	w0.001	AT1
FOSL1	TOB2	TRUE	6	cisbp__M4619	4.53	w0.001	AT1
FOSL1	TSC22D1	TRUE	63	cisbp__M4619	4.53	w0.001	AT1
FOSL1	TTC39B	TRUE	21	cisbp__M4619	4.53	w0.001	AT1
FOSL1	UBC	TRUE	35	cisbp__M4619	4.53	w0.001	AT1
FOSL1	UBQLN1	TRUE	7	cisbp__M4619	4.53	w0.001	AT1
FOSL1	USO1	TRUE	19	cisbp__M4619	4.53	w0.001	AT1
FOSL1	USP54	TRUE	12	cisbp__M4619	4.53	w0.001	AT1
FOSL1	VCL	TRUE	20	cisbp__M4619	4.53	w0.001	AT1
FOSL1	VIM	TRUE	30	cisbp__M4619	4.53	w0.001	AT1
FOSL1	VPS37B	TRUE	34	cisbp__M4619	4.53	w0.001	AT1
FOSL1	YWHAZ	TRUE	33	cisbp__M4619	4.53	w0.001	AT1
FOSL1	ZDHHC9	TRUE	34	cisbp__M4619	4.53	w0.001	AT1
FOSL1	ZFC3H1	TRUE	7	cisbp__M4619	4.53	w0.001	AT1
FOSL1	ZFP36	TRUE	25	cisbp__M4619	4.53	w0.001	AT1
FOSL1	SOCS3	TRUE	67	transfac_pro__M08938	4.36	top50perTarget	AT1
FOSL1	ABCC3	TRUE	3	factorbook__AP1	4.24	w0.001	AT1
FOSL1	ACSL4	TRUE	4	factorbook__AP1	4.24	w0.001	AT1
FOSL1	ANXA7	TRUE	14	factorbook__AP1	4.24	w0.001	AT1
FOSL1	C6orf132	TRUE	2	factorbook__AP1	4.24	w0.001	AT1
FOSL1	CKAP4	TRUE	1	factorbook__AP1	4.24	w0.001	AT1
FOSL1	CLIP1	TRUE	9	factorbook__AP1	4.24	w0.001	AT1
FOSL1	CLPX	TRUE	17	factorbook__AP1	4.24	w0.001	AT1
FOSL1	CTGF	TRUE	11	factorbook__AP1	4.24	w0.001	AT1
FOSL1	CTSE	TRUE	5	factorbook__AP1	4.24	w0.001	AT1
FOSL1	ERO1L	TRUE	3	factorbook__AP1	4.24	w0.001	AT1
FOSL1	FAM133B	TRUE	3	factorbook__AP1	4.24	w0.001	AT1
FOSL1	HMGCS1	TRUE	26	factorbook__AP1	4.24	w0.001	AT1
FOSL1	MDM2	TRUE	1	factorbook__AP1	4.24	w0.001	AT1
FOSL1	NFX1	TRUE	6	factorbook__AP1	4.24	w0.001	AT1
FOSL1	PANK3	TRUE	2	factorbook__AP1	4.24	w0.001	AT1
FOSL1	PCF11	TRUE	2	factorbook__AP1	4.24	w0.001	AT1
FOSL1	RAB31	TRUE	10	factorbook__AP1	4.24	w0.001	AT1
FOSL1	RAB3GAP2	TRUE	3	factorbook__AP1	4.24	w0.001	AT1
FOSL1	RASAL2	TRUE	14	factorbook__AP1	4.24	w0.001	AT1
FOSL1	RPS3	TRUE	5	factorbook__AP1	4.24	w0.001	AT1
FOSL1	SERINC2	TRUE	9	factorbook__AP1	4.24	w0.001	AT1
FOSL1	SERPINA1	TRUE	17	factorbook__AP1	4.24	w0.001	AT1
FOSL1	SKP1	TRUE	12	factorbook__AP1	4.24	w0.001	AT1
FOSL1	SLC30A1	TRUE	13	factorbook__AP1	4.24	w0.001	AT1
FOSL1	SUB1	TRUE	13	factorbook__AP1	4.24	w0.001	AT1
FOSL1	TOP1	TRUE	4	factorbook__AP1	4.24	w0.001	AT1
FOSL1	TPRG1	TRUE	6	factorbook__AP1	4.24	w0.001	AT1
FOSL1	TSC22D2	TRUE	11	factorbook__AP1	4.24	w0.001	AT1
FOSL1	TSC22D3	TRUE	5	factorbook__AP1	4.24	w0.001	AT1
FOSL1	YAP1	TRUE	6	factorbook__AP1	4.24	w0.001	AT1
FOSL1	ZFAND5	TRUE	26	factorbook__AP1	4.24	w0.001	AT1
FOSL1	ARL6IP5	TRUE	11	jaspar__MA0477.1	4.19	w0.001	AT1
FOSL1	FABP5	TRUE	2	jaspar__MA0477.1	4.19	w0.001	AT1
FOSL1	HSP90AA1	TRUE	11	jaspar__MA0477.1	4.19	w0.001	AT1
FOSL1	SPECC1	TRUE	9	jaspar__MA0477.1	4.19	w0.001	AT1
FOSL1	YPEL5	TRUE	15	jaspar__MA0477.1	4.19	w0.001	AT1
FOSL1	IL1R1	TRUE	7	cisbp__M2279	4.12	w0.001	AT1
FOSL1	INTS6	TRUE	3	cisbp__M2279	4.12	w0.001	AT1
FOSL1	ACTN1	TRUE	5	cisbp__M0296	3.82	w0.001	AT1
FOSL1	C19orf43	TRUE	1	cisbp__M0296	3.82	w0.001	AT1
FOSL1	CACYBP	TRUE	15	cisbp__M0296	3.82	w0.001	AT1
FOSL1	EIF1	TRUE	4	cisbp__M0296	3.82	w0.001	AT1
FOSL1	EMD	TRUE	6	cisbp__M0296	3.82	w0.001	AT1
FOSL1	CCL2	TRUE	9	cisbp__M6229	3.24	top50perTarget	AT1
FOSL1	MFSD2A	TRUE	1	transfac_pro__M00925	3.2	w0.005	AT1
HES1	HES1	TRUE	5	jaspar__MA1099.1	3.34	top1sd	AT1
HES1	IER3	TRUE	6	jaspar__MA1099.1	3.34	top1sd	AT1
HES1	IGF2R	TRUE	5	jaspar__MA1099.1	3.34	top1sd	AT1
HES1	KLF10	TRUE	2	jaspar__MA1099.1	3.34	top1sd	AT1
HES1	MECOM	TRUE	4	jaspar__MA1099.1	3.34	top1sd	AT1
HES1	MFHAS1	TRUE	2	jaspar__MA1099.1	3.34	top1sd	AT1
HES1	PER2	TRUE	6	jaspar__MA1099.1	3.34	top1sd	AT1
HES1	PPP1R10	TRUE	2	jaspar__MA1099.1	3.34	top1sd	AT1
HES1	SMG1	TRUE	2	jaspar__MA1099.1	3.34	top1sd	AT1
HES1	SOX4	TRUE	2	jaspar__MA1099.1	3.34	top1sd	AT1
HES1	TRPM7	TRUE	2	jaspar__MA1099.1	3.34	top1sd	AT1
HES1	ZBTB41	TRUE	3	jaspar__MA1099.1	3.34	top1sd	AT1
HIF1A	HIF1A	TRUE	1	transfac_pro__M00797	3.44	top10perTarget	AT1
HIF1A	NAMPT	TRUE	1	transfac_pro__M00797	3.44	top10perTarget	AT1
HIF1A	RREB1	TRUE	2	transfac_pro__M00797	3.44	top10perTarget	AT1
HIF1A	SLC11A2	TRUE	2	transfac_pro__M00797	3.44	top10perTarget	AT1
HIF1A	CLCN3	TRUE	1	hocomoco__HIF1A_HUMAN.H11MO.0.C	3.03	w0.005Andw0.001	AT1
HIF1A	CLPX	TRUE	1	hocomoco__HIF1A_HUMAN.H11MO.0.C	3.03	w0.005Andw0.001	AT1
HIF1A	CLTC	TRUE	1	hocomoco__HIF1A_HUMAN.H11MO.0.C	3.03	w0.005Andw0.001	AT1
HIF1A	COL4A3BP	TRUE	1	hocomoco__HIF1A_HUMAN.H11MO.0.C	3.03	w0.005Andw0.001	AT1
HIF1A	CYFIP1	TRUE	1	hocomoco__HIF1A_HUMAN.H11MO.0.C	3.03	w0.005Andw0.001	AT1
HIF1A	DDIT4	TRUE	1	hocomoco__HIF1A_HUMAN.H11MO.0.C	3.03	w0.005Andw0.001	AT1
HIF1A	EIF4G1	TRUE	1	hocomoco__HIF1A_HUMAN.H11MO.0.C	3.03	w0.005Andw0.001	AT1
HIF1A	ENO1	TRUE	1	hocomoco__HIF1A_HUMAN.H11MO.0.C	3.03	w0.005Andw0.001	AT1
HIF1A	ETS1	TRUE	1	hocomoco__HIF1A_HUMAN.H11MO.0.C	3.03	w0.005Andw0.001	AT1
HIF1A	GPR183	TRUE	1	hocomoco__HIF1A_HUMAN.H11MO.0.C	3.03	w0.005Andw0.001	AT1
HIF1A	HK1	TRUE	1	hocomoco__HIF1A_HUMAN.H11MO.0.C	3.03	w0.005Andw0.001	AT1
HIF1A	IGF2R	TRUE	1	hocomoco__HIF1A_HUMAN.H11MO.0.C	3.03	w0.005Andw0.001	AT1
HIF1A	KLF10	TRUE	1	hocomoco__HIF1A_HUMAN.H11MO.0.C	3.03	w0.005Andw0.001	AT1
HIF1A	LAMP1	TRUE	1	hocomoco__HIF1A_HUMAN.H11MO.0.C	3.03	w0.005Andw0.001	AT1
HIF1A	LMO3	TRUE	1	hocomoco__HIF1A_HUMAN.H11MO.0.C	3.03	w0.005Andw0.001	AT1
HIF1A	MAFF	TRUE	1	hocomoco__HIF1A_HUMAN.H11MO.0.C	3.03	w0.005Andw0.001	AT1
HIF1A	NR1D1	TRUE	1	hocomoco__HIF1A_HUMAN.H11MO.0.C	3.03	w0.005Andw0.001	AT1
HIF1A	PER2	TRUE	1	hocomoco__HIF1A_HUMAN.H11MO.0.C	3.03	w0.005Andw0.001	AT1
HIF1A	PMP22	TRUE	1	hocomoco__HIF1A_HUMAN.H11MO.0.C	3.03	w0.005Andw0.001	AT1
HIF1A	RPL14	TRUE	1	hocomoco__HIF1A_HUMAN.H11MO.0.C	3.03	w0.005Andw0.001	AT1
HIF1A	RPL32	TRUE	1	hocomoco__HIF1A_HUMAN.H11MO.0.C	3.03	w0.005Andw0.001	AT1
HIF1A	RPL6	TRUE	1	hocomoco__HIF1A_HUMAN.H11MO.0.C	3.03	w0.005Andw0.001	AT1
HIF1A	RPS13	TRUE	1	hocomoco__HIF1A_HUMAN.H11MO.0.C	3.03	w0.005Andw0.001	AT1
HIF1A	RUNX1	TRUE	1	hocomoco__HIF1A_HUMAN.H11MO.0.C	3.03	w0.005Andw0.001	AT1
HIF1A	SEC31A	TRUE	1	hocomoco__HIF1A_HUMAN.H11MO.0.C	3.03	w0.005Andw0.001	AT1
HIF1A	SMG1	TRUE	1	hocomoco__HIF1A_HUMAN.H11MO.0.C	3.03	w0.005Andw0.001	AT1
HIF1A	SRSF6	TRUE	1	hocomoco__HIF1A_HUMAN.H11MO.0.C	3.03	w0.005Andw0.001	AT1
HIF1A	TFRC	TRUE	1	hocomoco__HIF1A_HUMAN.H11MO.0.C	3.03	w0.005Andw0.001	AT1
HIF1A	TPT1	TRUE	1	hocomoco__HIF1A_HUMAN.H11MO.0.C	3.03	w0.005Andw0.001	AT1
HIF1A	UBE2Q1	TRUE	1	hocomoco__HIF1A_HUMAN.H11MO.0.C	3.03	w0.005Andw0.001	AT1
HIF1A	UBE3C	TRUE	1	hocomoco__HIF1A_HUMAN.H11MO.0.C	3.03	w0.005Andw0.001	AT1
HIF1A	USO1	TRUE	1	hocomoco__HIF1A_HUMAN.H11MO.0.C	3.03	w0.005Andw0.001	AT1
HIF1A	VPS53	TRUE	1	hocomoco__HIF1A_HUMAN.H11MO.0.C	3.03	w0.005Andw0.001	AT1
HIF1A	WSB1	TRUE	1	hocomoco__HIF1A_HUMAN.H11MO.0.C	3.03	w0.005Andw0.001	AT1
HIF1A	ZFP36L2	TRUE	1	hocomoco__HIF1A_HUMAN.H11MO.0.C	3.03	w0.005Andw0.001	AT1
HIF1A	ZNF331	TRUE	1	hocomoco__HIF1A_HUMAN.H11MO.0.C	3.03	w0.005Andw0.001	AT1
IRF1	B2M	TRUE	45	cisbp__M6307	4.06	top10perTarget	AT1
IRF1	BST2	TRUE	47	cisbp__M6307	4.06	top10perTarget	AT1
IRF1	CCL5	TRUE	50	cisbp__M6307	4.06	top10perTarget	AT1
IRF1	ETS1	TRUE	25	cisbp__M6307	4.06	top10perTarget	AT1
IRF1	GADD45B	TRUE	46	cisbp__M6307	4.06	top10perTarget	AT1
IRF1	GZMA	TRUE	36	cisbp__M6307	4.06	top10perTarget	AT1
IRF1	IFI16	TRUE	17	cisbp__M6307	4.06	top10perTarget	AT1
IRF1	PARP14	TRUE	49	cisbp__M6307	4.06	top10perTarget	AT1
IRF1	RUNX3	TRUE	32	cisbp__M6307	4.06	top10perTarget	AT1
IRF1	SF1	TRUE	9	cisbp__M6307	4.06	top10perTarget	AT1
IRF1	BATF	TRUE	6	tfdimers__MD00276	3.66	top10perTarget	AT1
IRF1	CCL2	TRUE	9	tfdimers__MD00276	3.66	top10perTarget	AT1
IRF1	GZMH	TRUE	2	tfdimers__MD00276	3.66	top10perTarget	AT1
IRF1	MFHAS1	TRUE	2	tfdimers__MD00276	3.66	top10perTarget	AT1
IRF1	CD37	TRUE	5	dbcorrdb__IRF1__ENCSR000EGL_1__m1	3.62	top1sd	AT1
IRF1	HLA-A	TRUE	4	dbcorrdb__IRF1__ENCSR000EGL_1__m1	3.62	top1sd	AT1
IRF1	SOCS1	TRUE	30	dbcorrdb__IRF1__ENCSR000EGL_1__m1	3.62	top1sd	AT1
IRF1	PIM1	TRUE	18	swissregulon__hs__IRF1_2_7.p3	3.6	top10perTarget	AT1
IRF1	DUSP5	TRUE	12	transfac_pro__M04788	3.43	top1sd	AT1
IRF1	BCL3	TRUE	23	dbcorrdb__IRF1__ENCSR000EGU_1__m2	3.29	top5perTarget	AT1
IRF1	IRF1	TRUE	31	dbcorrdb__IRF1__ENCSR000EGU_1__m2	3.29	top5perTarget	AT1
IRF1	KDM6B	TRUE	19	dbcorrdb__IRF1__ENCSR000EGU_1__m2	3.29	top5perTarget	AT1
IRF1	RALGDS	TRUE	14	dbcorrdb__IRF1__ENCSR000EGU_1__m2	3.29	top5perTarget	AT1
IRF1	REL	TRUE	10	dbcorrdb__IRF1__ENCSR000EGU_1__m2	3.29	top5perTarget	AT1
IRF1	SDC4	TRUE	15	dbcorrdb__IRF1__ENCSR000EGU_1__m2	3.29	top5perTarget	AT1
IRF1	SOCS3	TRUE	18	dbcorrdb__IRF1__ENCSR000EGU_1__m2	3.29	top5perTarget	AT1
IRF1	DNAJA1	TRUE	13	swissregulon__hs__IRF1_2_7.p3	3.22	top1sd	AT1
IRF1	FYN	TRUE	11	swissregulon__hs__IRF1_2_7.p3	3.22	top1sd	AT1
IRF1	GPBP1	TRUE	24	swissregulon__hs__IRF1_2_7.p3	3.22	top1sd	AT1
IRF1	H3F3B	TRUE	17	swissregulon__hs__IRF1_2_7.p3	3.22	top1sd	AT1
IRF1	FAM46C	TRUE	9	transfac_pro__M08887	3.18	top1sd	AT1
IRF1	TNFAIP3	TRUE	8	tfdimers__MD00138	3.04	top10perTarget	AT1
JUN	ANXA1	TRUE	65	transfac_pro__M08942	4.77	top1sd	AT1
JUN	ATF3	TRUE	365	transfac_pro__M08942	4.77	top1sd	AT1
JUN	DUSP1	TRUE	354	transfac_pro__M08942	4.77	top1sd	AT1
JUN	FOSB	TRUE	329	transfac_pro__M08942	4.77	top1sd	AT1
JUN	HBEGF	TRUE	62	transfac_pro__M08942	4.77	top1sd	AT1
JUN	IFRD1	TRUE	60	transfac_pro__M08942	4.77	top1sd	AT1
JUN	JUNB	TRUE	75	transfac_pro__M08942	4.77	top1sd	AT1
JUN	KLF6	TRUE	309	transfac_pro__M08942	4.77	top1sd	AT1
JUN	SERTAD1	TRUE	57	transfac_pro__M08942	4.77	top1sd	AT1
JUN	SLC38A2	TRUE	45	transfac_pro__M08942	4.77	top1sd	AT1
JUN	UBC	TRUE	216	transfac_pro__M08942	4.77	top1sd	AT1
JUN	DNAJB4	TRUE	208	transfac_pro__M07684	4.25	top3sd	AT1
JUN	HSP90AA1	TRUE	25	transfac_pro__M07684	4.25	top3sd	AT1
JUN	IER2	TRUE	121	transfac_pro__M07684	4.25	top3sd	AT1
JUN	JUN	TRUE	292	transfac_pro__M07684	4.25	top3sd	AT1
JUN	JUND	TRUE	297	transfac_pro__M07684	4.25	top3sd	AT1
JUN	PPP1R15A	TRUE	278	transfac_pro__M07684	4.25	top3sd	AT1
JUN	UBB	TRUE	112	transfac_pro__M07684	4.25	top3sd	AT1
JUN	FOS	TRUE	233	taipale_cyt_meth__JUN_NATGACGTCAYN_FL	4.21	top3sd	AT1
JUN	ZFP36	TRUE	49	hocomoco__JUN_MOUSE.H11MO.0.A	4.17	top1sd	AT1
JUN	EGR1	TRUE	149	transfac_pro__M07684	3.99	top3sd	AT1
JUN	HSPA1A	TRUE	123	transfac_pro__M07684	3.99	top3sd	AT1
JUN	ID3	TRUE	141	transfac_pro__M07684	3.99	top3sd	AT1
JUN	RHOB	TRUE	43	transfac_pro__M07684	3.99	top3sd	AT1
JUN	SOX4	TRUE	97	transfac_pro__M07684	3.99	top3sd	AT1
JUN	TRA2B	TRUE	208	transfac_pro__M07684	3.99	top3sd	AT1
JUN	HSPB1	TRUE	25	transfac_pro__M08943	3.82	top3sd	AT1
JUN	CLDN4	TRUE	19	cisbp__M6319	3.79	top10perTarget	AT1
JUN	CSRNP1	TRUE	15	cisbp__M6319	3.79	top10perTarget	AT1
JUN	EIF5	TRUE	23	cisbp__M6319	3.79	top10perTarget	AT1
JUN	H3F3B	TRUE	19	cisbp__M6319	3.79	top10perTarget	AT1
JUN	LAMA3	TRUE	17	cisbp__M6319	3.79	top10perTarget	AT1
JUN	WEE1	TRUE	19	cisbp__M6319	3.79	top10perTarget	AT1
JUN	RASAL2	TRUE	6	stark__TGANTCA	3.5	top10perTarget	AT1
JUN	SRSF7	TRUE	19	stark__TGANTCA	3.5	top10perTarget	AT1
JUN	VPS37B	TRUE	17	stark__TGANTCA	3.5	top10perTarget	AT1
JUN	ACAA1	TRUE	1	cisbp__M0311	3.3	top10perTarget	AT1
JUN	AHR	TRUE	9	cisbp__M0311	3.3	top10perTarget	AT1
JUN	ARF6	TRUE	2	cisbp__M0311	3.3	top10perTarget	AT1
JUN	CACYBP	TRUE	12	cisbp__M0311	3.3	top10perTarget	AT1
JUN	CDKN1C	TRUE	5	cisbp__M0311	3.3	top10perTarget	AT1
JUN	CEBPB	TRUE	8	cisbp__M0311	3.3	top10perTarget	AT1
JUN	CLDN3	TRUE	7	cisbp__M0311	3.3	top10perTarget	AT1
JUN	CLK1	TRUE	5	cisbp__M0311	3.3	top10perTarget	AT1
JUN	CRYAB	TRUE	6	cisbp__M0311	3.3	top10perTarget	AT1
JUN	CUTA	TRUE	4	cisbp__M0311	3.3	top10perTarget	AT1
JUN	CYR61	TRUE	6	cisbp__M0311	3.3	top10perTarget	AT1
JUN	DDX3X	TRUE	1	cisbp__M0311	3.3	top10perTarget	AT1
JUN	DEDD2	TRUE	4	cisbp__M0311	3.3	top10perTarget	AT1
JUN	DENND3	TRUE	4	cisbp__M0311	3.3	top10perTarget	AT1
JUN	DNAJB6	TRUE	4	cisbp__M0311	3.3	top10perTarget	AT1
JUN	DYNLL1	TRUE	4	cisbp__M0311	3.3	top10perTarget	AT1
JUN	EIF1	TRUE	7	cisbp__M0311	3.3	top10perTarget	AT1
JUN	ERF	TRUE	3	cisbp__M0311	3.3	top10perTarget	AT1
JUN	FLRT3	TRUE	2	cisbp__M0311	3.3	top10perTarget	AT1
JUN	GABARAPL1	TRUE	6	cisbp__M0311	3.3	top10perTarget	AT1
JUN	GPBP1	TRUE	10	cisbp__M0311	3.3	top10perTarget	AT1
JUN	H1FX	TRUE	3	cisbp__M0311	3.3	top10perTarget	AT1
JUN	HNRNPA0	TRUE	7	cisbp__M0311	3.3	top10perTarget	AT1
JUN	HNRNPA2B1	TRUE	6	cisbp__M0311	3.3	top10perTarget	AT1
JUN	HSP90AB1	TRUE	11	cisbp__M0311	3.3	top10perTarget	AT1
JUN	HSPA1B	TRUE	2	cisbp__M0311	3.3	top10perTarget	AT1
JUN	HSPA8	TRUE	8	cisbp__M0311	3.3	top10perTarget	AT1
JUN	HSPH1	TRUE	6	cisbp__M0311	3.3	top10perTarget	AT1
JUN	ID4	TRUE	7	cisbp__M0311	3.3	top10perTarget	AT1
JUN	IGLL5	TRUE	7	cisbp__M0311	3.3	top10perTarget	AT1
JUN	KLF9	TRUE	7	cisbp__M0311	3.3	top10perTarget	AT1
JUN	LBH	TRUE	10	cisbp__M0311	3.3	top10perTarget	AT1
JUN	MCL1	TRUE	4	cisbp__M0311	3.3	top10perTarget	AT1
JUN	MLF1	TRUE	6	cisbp__M0311	3.3	top10perTarget	AT1
JUN	MYADM	TRUE	4	cisbp__M0311	3.3	top10perTarget	AT1
JUN	N4BP2L2	TRUE	1	cisbp__M0311	3.3	top10perTarget	AT1
JUN	NEU1	TRUE	5	cisbp__M0311	3.3	top10perTarget	AT1
JUN	NR4A1	TRUE	10	cisbp__M0311	3.3	top10perTarget	AT1
JUN	NTM	TRUE	3	cisbp__M0311	3.3	top10perTarget	AT1
JUN	PLEKHH2	TRUE	5	cisbp__M0311	3.3	top10perTarget	AT1
JUN	PPP1R10	TRUE	13	cisbp__M0311	3.3	top10perTarget	AT1
JUN	PPP1R2	TRUE	7	cisbp__M0311	3.3	top10perTarget	AT1
JUN	RCAN1	TRUE	10	cisbp__M0311	3.3	top10perTarget	AT1
JUN	RP1	TRUE	5	cisbp__M0311	3.3	top10perTarget	AT1
JUN	RUNX1	TRUE	9	cisbp__M0311	3.3	top10perTarget	AT1
JUN	SEMA4A	TRUE	4	cisbp__M0311	3.3	top10perTarget	AT1
JUN	SERTAD3	TRUE	5	cisbp__M0311	3.3	top10perTarget	AT1
JUN	SF1	TRUE	7	cisbp__M0311	3.3	top10perTarget	AT1
JUN	SFTPC	TRUE	2	cisbp__M0311	3.3	top10perTarget	AT1
JUN	SLC25A25	TRUE	9	cisbp__M0311	3.3	top10perTarget	AT1
JUN	SOCS3	TRUE	5	cisbp__M0311	3.3	top10perTarget	AT1
JUN	SPRY1	TRUE	3	cisbp__M0311	3.3	top10perTarget	AT1
JUN	SRSF5	TRUE	6	cisbp__M0311	3.3	top10perTarget	AT1
JUN	TCF7	TRUE	7	cisbp__M0311	3.3	top10perTarget	AT1
JUN	TRIB1	TRUE	8	cisbp__M0311	3.3	top10perTarget	AT1
JUN	TSC22D1	TRUE	11	cisbp__M0311	3.3	top10perTarget	AT1
JUN	TSC22D3	TRUE	4	cisbp__M0311	3.3	top10perTarget	AT1
JUN	ZFAND5	TRUE	11	cisbp__M0311	3.3	top10perTarget	AT1
JUN	ZFP36L1	TRUE	8	cisbp__M0311	3.3	top10perTarget	AT1
JUN	BRD2	TRUE	18	cisbp__M4557	3.16	top50	AT1
JUN	SERPINH1	TRUE	2	flyfactorsurvey__kay_Jra_SANGER_5_FBgn0001291	3.16	top1sd	AT1
JUNB	BCL3	TRUE	83	transfac_public__M00517	5.2	top5perTarget	AT1
JUNB	EIF5	TRUE	148	transfac_public__M00517	5.2	top5perTarget	AT1
JUNB	GADD45A	TRUE	73	transfac_public__M00517	5.2	top5perTarget	AT1
JUNB	H3F3B	TRUE	120	transfac_public__M00517	5.2	top5perTarget	AT1
JUNB	IRF1	TRUE	47	transfac_public__M00517	5.2	top5perTarget	AT1
JUNB	JUNB	TRUE	137	transfac_public__M00517	5.2	top5perTarget	AT1
JUNB	TCF7	TRUE	42	transfac_public__M00517	5.2	top5perTarget	AT1
JUNB	ZFP36	TRUE	92	transfac_public__M00517	5.2	top5perTarget	AT1
JUNB	IER3	TRUE	31	hocomoco__JUNB_MOUSE.H11MO.0.A	5.03	top5perTarget	AT1
JUNB	MT2A	TRUE	43	hocomoco__JUNB_MOUSE.H11MO.0.A	5.03	top5perTarget	AT1
JUNB	PTMA	TRUE	55	hocomoco__JUNB_MOUSE.H11MO.0.A	5.03	top5perTarget	AT1
JUNB	SERTAD1	TRUE	76	hocomoco__JUNB_MOUSE.H11MO.0.A	5.03	top5perTarget	AT1
JUNB	GADD45B	TRUE	44	swissregulon__hs__FOS_FOS_B_L1__JUN_B_D_.p2	4.58	top5perTarget	AT1
JUNB	IER5	TRUE	6	factorbook__AP1	4.26	top5perTarget	AT1
JUNB	MAFF	TRUE	102	factorbook__AP1	4.26	top5perTarget	AT1
JUNB	PLK3	TRUE	57	factorbook__AP1	4.26	top5perTarget	AT1
JUNB	SLC30A1	TRUE	8	factorbook__AP1	4.26	top5perTarget	AT1
JUNB	YPEL5	TRUE	33	factorbook__AP1	4.26	top5perTarget	AT1
JUNB	PPP1R10	TRUE	55	transfac_pro__M03551	4.15	top5perTarget	AT1
JUNB	PABPC1	TRUE	18	flyfactorsurvey__kay_Jra_SANGER_5_FBgn0001291	3.99	top5perTarget	AT1
JUNB	EIF1	TRUE	63	transfac_pro__M08926	3.98	top5perTarget	AT1
JUNB	ARID5A	TRUE	18	transfac_pro__M08944	3.92	top1sd	AT1
JUNB	ATF3	TRUE	114	transfac_pro__M08944	3.92	top1sd	AT1
JUNB	FOSB	TRUE	120	transfac_pro__M08944	3.92	top1sd	AT1
JUNB	IL7R	TRUE	29	transfac_pro__M08944	3.92	top1sd	AT1
JUNB	UBC	TRUE	101	transfac_pro__M08944	3.92	top1sd	AT1
JUNB	ANXA1	TRUE	24	transfac_pro__M08923	3.68	top10perTarget	AT1
JUNB	CSRNP1	TRUE	24	transfac_pro__M08923	3.68	top10perTarget	AT1
JUNB	DUSP1	TRUE	88	transfac_pro__M08923	3.68	top10perTarget	AT1
JUNB	DUSP5	TRUE	26	transfac_pro__M08923	3.68	top10perTarget	AT1
JUNB	IFRD1	TRUE	45	transfac_pro__M08923	3.68	top10perTarget	AT1
JUNB	KDM6B	TRUE	50	transfac_pro__M08923	3.68	top10perTarget	AT1
JUNB	KLF6	TRUE	70	transfac_pro__M08923	3.68	top10perTarget	AT1
JUNB	PIM1	TRUE	24	transfac_pro__M08923	3.68	top10perTarget	AT1
JUNB	SLC38A2	TRUE	13	transfac_pro__M08923	3.68	top10perTarget	AT1
JUNB	VPS37B	TRUE	79	transfac_pro__M08923	3.68	top10perTarget	AT1
JUNB	YWHAZ	TRUE	62	transfac_pro__M08923	3.68	top10perTarget	AT1
JUNB	ACTG1	TRUE	15	cisbp__M0312	3.09	top10perTarget	AT1
JUNB	ARL4A	TRUE	38	cisbp__M0312	3.09	top10perTarget	AT1
JUNB	CDKN1C	TRUE	10	cisbp__M0312	3.09	top10perTarget	AT1
JUNB	CREM	TRUE	103	cisbp__M0312	3.09	top10perTarget	AT1
JUNB	FXYD5	TRUE	4	cisbp__M0312	3.09	top10perTarget	AT1
JUNB	GPBP1	TRUE	73	cisbp__M0312	3.09	top10perTarget	AT1
JUNB	HLA-A	TRUE	6	cisbp__M0312	3.09	top10perTarget	AT1
JUNB	JUN	TRUE	84	cisbp__M0312	3.09	top10perTarget	AT1
JUNB	JUND	TRUE	102	cisbp__M0312	3.09	top10perTarget	AT1
JUNB	KLF10	TRUE	3	cisbp__M0312	3.09	top10perTarget	AT1
JUNB	KLF2	TRUE	4	cisbp__M0312	3.09	top10perTarget	AT1
JUNB	KLF4	TRUE	11	cisbp__M0312	3.09	top10perTarget	AT1
JUNB	MAFB	TRUE	31	cisbp__M0312	3.09	top10perTarget	AT1
JUNB	MARCKSL1	TRUE	8	cisbp__M0312	3.09	top10perTarget	AT1
JUNB	MYADM	TRUE	18	cisbp__M0312	3.09	top10perTarget	AT1
JUNB	NR4A1	TRUE	14	cisbp__M0312	3.09	top10perTarget	AT1
JUNB	NR4A3	TRUE	72	cisbp__M0312	3.09	top10perTarget	AT1
JUNB	PER2	TRUE	66	cisbp__M0312	3.09	top10perTarget	AT1
JUNB	PMAIP1	TRUE	36	cisbp__M0312	3.09	top10perTarget	AT1
JUNB	REL	TRUE	38	cisbp__M0312	3.09	top10perTarget	AT1
JUNB	RPL17	TRUE	9	cisbp__M0312	3.09	top10perTarget	AT1
JUNB	SF1	TRUE	40	cisbp__M0312	3.09	top10perTarget	AT1
JUNB	SOCS3	TRUE	14	cisbp__M0312	3.09	top10perTarget	AT1
JUNB	TGIF1	TRUE	26	cisbp__M0312	3.09	top10perTarget	AT1
JUNB	TNFAIP3	TRUE	12	cisbp__M0312	3.09	top10perTarget	AT1
JUNB	TRIB1	TRUE	74	cisbp__M0312	3.09	top10perTarget	AT1
JUNB	ZFP36L1	TRUE	48	cisbp__M0312	3.09	top10perTarget	AT1
JUND	ANXA1	TRUE	186	transfac_pro__M08933	7.78	top3sd	AT1
JUND	ATF3	TRUE	436	transfac_pro__M08933	7.78	top3sd	AT1
JUND	CSRNP1	TRUE	124	transfac_pro__M08933	7.78	top3sd	AT1
JUND	FOSB	TRUE	351	transfac_pro__M08933	7.78	top3sd	AT1
JUND	H3F3B	TRUE	211	transfac_pro__M08933	7.78	top3sd	AT1
JUND	JUNB	TRUE	233	transfac_pro__M08933	7.78	top3sd	AT1
JUND	KLF6	TRUE	344	transfac_pro__M08933	7.78	top3sd	AT1
JUND	SERTAD1	TRUE	92	transfac_pro__M08933	7.78	top3sd	AT1
JUND	UBC	TRUE	303	transfac_pro__M08933	7.78	top3sd	AT1
JUND	ZFP36	TRUE	125	transfac_pro__M08933	7.78	top3sd	AT1
JUND	DUSP1	TRUE	244	transfac_pro__M08934	7.46	top50	AT1
JUND	GADD45B	TRUE	43	transfac_pro__M08934	7.46	top50	AT1
JUND	IFRD1	TRUE	139	transfac_pro__M08934	7.46	top50	AT1
JUND	LMNA	TRUE	84	transfac_pro__M08934	7.46	top50	AT1
JUND	MT2A	TRUE	69	swissregulon__hs__FOS_FOS_B_L1__JUN_B_D_.p2	6.79	top50	AT1
JUND	HSPB1	TRUE	20	stark__TGANTCA	6.28	top3sd	AT1
JUND	EIF1	TRUE	158	cisbp__M0320	6.2	top3sd	AT1
JUND	DNAJB1	TRUE	43	cisbp__M5050	6.08	top3sd	AT1
JUND	HSP90AA1	TRUE	29	cisbp__M5050	6.08	top3sd	AT1
JUND	JUN	TRUE	262	dbcorrdb__JUND__ENCSR000EBZ_1__m1	5.18	top50	AT1
JUND	MAFF	TRUE	166	dbcorrdb__JUND__ENCSR000EBZ_1__m2	4.08	top50	AT1
JUND	MYADM	TRUE	111	cisbp__M4541	3.96	top50	AT1
JUND	BTG1	TRUE	138	taipale_cyt_meth__JUND_NRTGACGTCATN_eDBD	3.74	top1sd	AT1
JUND	CCNL1	TRUE	34	taipale_cyt_meth__JUND_NRTGACGTCATN_eDBD	3.74	top1sd	AT1
JUND	CLDN4	TRUE	86	taipale_cyt_meth__JUND_NRTGACGTCATN_eDBD	3.74	top1sd	AT1
JUND	EGR1	TRUE	117	taipale_cyt_meth__JUND_NRTGACGTCATN_eDBD	3.74	top1sd	AT1
JUND	ERF	TRUE	96	taipale_cyt_meth__JUND_NRTGACGTCATN_eDBD	3.74	top1sd	AT1
JUND	FOS	TRUE	208	taipale_cyt_meth__JUND_NRTGACGTCATN_eDBD	3.74	top1sd	AT1
JUND	HSP90AB1	TRUE	130	taipale_cyt_meth__JUND_NRTGACGTCATN_eDBD	3.74	top1sd	AT1
JUND	HSPH1	TRUE	90	taipale_cyt_meth__JUND_NRTGACGTCATN_eDBD	3.74	top1sd	AT1
JUND	IER2	TRUE	98	taipale_cyt_meth__JUND_NRTGACGTCATN_eDBD	3.74	top1sd	AT1
JUND	JUND	TRUE	276	taipale_cyt_meth__JUND_NRTGACGTCATN_eDBD	3.74	top1sd	AT1
JUND	LBH	TRUE	136	taipale_cyt_meth__JUND_NRTGACGTCATN_eDBD	3.74	top1sd	AT1
JUND	PPP1R15A	TRUE	252	taipale_cyt_meth__JUND_NRTGACGTCATN_eDBD	3.74	top1sd	AT1
JUND	RCAN1	TRUE	118	taipale_cyt_meth__JUND_NRTGACGTCATN_eDBD	3.74	top1sd	AT1
JUND	TRA2B	TRUE	89	taipale_cyt_meth__JUND_NRTGACGTCATN_eDBD	3.74	top1sd	AT1
JUND	UBB	TRUE	82	taipale_cyt_meth__JUND_NRTGACGTCATN_eDBD	3.74	top1sd	AT1
JUND	WEE1	TRUE	59	taipale_cyt_meth__JUND_NRTGACGTCATN_eDBD	3.74	top1sd	AT1
JUND	DNAJB4	TRUE	124	transfac_pro__M07684	3.7	top1sd	AT1
JUND	CRYAB	TRUE	80	taipale_cyt_meth__JUND_NRTGACGCATN_eDBD_repr	3.57	top50	AT1
JUND	HNRNPA0	TRUE	34	taipale_cyt_meth__JUND_NRTGACGCATN_eDBD_repr	3.57	top50	AT1
JUND	NR4A1	TRUE	31	taipale_cyt_meth__JUND_NRTGACGCATN_eDBD_repr	3.57	top50	AT1
JUND	TSC22D3	TRUE	78	taipale_cyt_meth__JUND_NRTGACGCATN_eDBD_repr	3.57	top50	AT1
JUND	HSPA1A	TRUE	93	transfac_pro__M08935	3.56	top1sd	AT1
JUND	MCL1	TRUE	56	transfac_pro__M08935	3.56	top1sd	AT1
JUND	RHOB	TRUE	15	transfac_pro__M08935	3.56	top1sd	AT1
JUND	SERTAD3	TRUE	52	transfac_pro__M08935	3.56	top1sd	AT1
JUND	SF1	TRUE	97	transfac_pro__M08935	3.56	top1sd	AT1
JUND	HBB	TRUE	9	cisbp__M4624	3.07	top50	AT1
KLF4	ACADVL	TRUE	1	transfac_pro__M07461	3.03	w0.005	AT1
KLF4	ACP5	TRUE	3	transfac_pro__M07461	3.03	w0.005	AT1
KLF4	ACTN1	TRUE	1	transfac_pro__M07461	3.03	w0.005	AT1
KLF4	AGR3	TRUE	3	transfac_pro__M07461	3.03	w0.005	AT1
KLF4	ALPP	TRUE	3	transfac_pro__M07461	3.03	w0.005	AT1
KLF4	APOC1	TRUE	5	transfac_pro__M07461	3.03	w0.005	AT1
KLF4	APOE	TRUE	4	transfac_pro__M07461	3.03	w0.005	AT1
KLF4	ARF6	TRUE	2	transfac_pro__M07461	3.03	w0.005	AT1
KLF4	ARHGAP18	TRUE	1	transfac_pro__M07461	3.03	w0.005	AT1
KLF4	ARID5A	TRUE	1	transfac_pro__M07461	3.03	w0.005	AT1
KLF4	ARL4A	TRUE	2	transfac_pro__M07461	3.03	w0.005	AT1
KLF4	ATP5G2	TRUE	1	transfac_pro__M07461	3.03	w0.005	AT1
KLF4	ATP6V1A	TRUE	1	transfac_pro__M07461	3.03	w0.005	AT1
KLF4	BCL3	TRUE	2	transfac_pro__M07461	3.03	w0.005	AT1
KLF4	C12orf57	TRUE	1	transfac_pro__M07461	3.03	w0.005	AT1
KLF4	C12orf75	TRUE	4	transfac_pro__M07461	3.03	w0.005	AT1
KLF4	CCL20	TRUE	3	transfac_pro__M07461	3.03	w0.005	AT1
KLF4	CD37	TRUE	1	transfac_pro__M07461	3.03	w0.005	AT1
KLF4	CD53	TRUE	1	transfac_pro__M07461	3.03	w0.005	AT1
KLF4	CD68	TRUE	2	transfac_pro__M07461	3.03	w0.005	AT1
KLF4	CD74	TRUE	1	transfac_pro__M07461	3.03	w0.005	AT1
KLF4	CLPX	TRUE	1	transfac_pro__M07461	3.03	w0.005	AT1
KLF4	COMMD6	TRUE	3	transfac_pro__M07461	3.03	w0.005	AT1
KLF4	CXCR4	TRUE	4	transfac_pro__M07461	3.03	w0.005	AT1
KLF4	CYBA	TRUE	1	transfac_pro__M07461	3.03	w0.005	AT1
KLF4	DGKH	TRUE	2	transfac_pro__M07461	3.03	w0.005	AT1
KLF4	DSP	TRUE	2	transfac_pro__M07461	3.03	w0.005	AT1
KLF4	DUSP5	TRUE	5	transfac_pro__M07461	3.03	w0.005	AT1
KLF4	ELL2	TRUE	2	transfac_pro__M07461	3.03	w0.005	AT1
KLF4	EMP3	TRUE	6	transfac_pro__M07461	3.03	w0.005	AT1
KLF4	EREG	TRUE	1	transfac_pro__M07461	3.03	w0.005	AT1
KLF4	ERF	TRUE	2	transfac_pro__M07461	3.03	w0.005	AT1
KLF4	ETS1	TRUE	1	transfac_pro__M07461	3.03	w0.005	AT1
KLF4	FN1	TRUE	1	transfac_pro__M07461	3.03	w0.005	AT1
KLF4	FTL	TRUE	2	transfac_pro__M07461	3.03	w0.005	AT1
KLF4	FXYD5	TRUE	1	transfac_pro__M07461	3.03	w0.005	AT1
KLF4	GART	TRUE	1	transfac_pro__M07461	3.03	w0.005	AT1
KLF4	GRASP	TRUE	2	transfac_pro__M07461	3.03	w0.005	AT1
KLF4	GYPC	TRUE	2	transfac_pro__M07461	3.03	w0.005	AT1
KLF4	H1F0	TRUE	1	transfac_pro__M07461	3.03	w0.005	AT1
KLF4	HK1	TRUE	1	transfac_pro__M07461	3.03	w0.005	AT1
KLF4	IL1B	TRUE	2	transfac_pro__M07461	3.03	w0.005	AT1
KLF4	IMPAD1	TRUE	1	transfac_pro__M07461	3.03	w0.005	AT1
KLF4	ITGA2	TRUE	1	transfac_pro__M07461	3.03	w0.005	AT1
KLF4	KIAA1033	TRUE	1	transfac_pro__M07461	3.03	w0.005	AT1
KLF4	LCN2	TRUE	4	transfac_pro__M07461	3.03	w0.005	AT1
KLF4	LTB	TRUE	3	transfac_pro__M07461	3.03	w0.005	AT1
KLF4	MAFF	TRUE	1	transfac_pro__M07461	3.03	w0.005	AT1
KLF4	MAP4K3	TRUE	2	transfac_pro__M07461	3.03	w0.005	AT1
KLF4	MARCKSL1	TRUE	1	transfac_pro__M07461	3.03	w0.005	AT1
KLF4	MDK	TRUE	1	transfac_pro__M07461	3.03	w0.005	AT1
KLF4	MFSD6	TRUE	1	transfac_pro__M07461	3.03	w0.005	AT1
KLF4	MKLN1	TRUE	1	transfac_pro__M07461	3.03	w0.005	AT1
KLF4	NAMPT	TRUE	1	transfac_pro__M07461	3.03	w0.005	AT1
KLF4	NPC2	TRUE	4	transfac_pro__M07461	3.03	w0.005	AT1
KLF4	NR4A2	TRUE	3	transfac_pro__M07461	3.03	w0.005	AT1
KLF4	NR4A3	TRUE	4	transfac_pro__M07461	3.03	w0.005	AT1
KLF4	NRP2	TRUE	1	transfac_pro__M07461	3.03	w0.005	AT1
KLF4	PNN	TRUE	1	transfac_pro__M07461	3.03	w0.005	AT1
KLF4	PNRC1	TRUE	3	transfac_pro__M07461	3.03	w0.005	AT1
KLF4	PPAP2A	TRUE	1	transfac_pro__M07461	3.03	w0.005	AT1
KLF4	PSMA6	TRUE	1	transfac_pro__M07461	3.03	w0.005	AT1
KLF4	PSMD1	TRUE	1	transfac_pro__M07461	3.03	w0.005	AT1
KLF4	PSMD12	TRUE	1	transfac_pro__M07461	3.03	w0.005	AT1
KLF4	PTPRC	TRUE	1	transfac_pro__M07461	3.03	w0.005	AT1
KLF4	REL	TRUE	1	transfac_pro__M07461	3.03	w0.005	AT1
KLF4	RHOB	TRUE	3	transfac_pro__M07461	3.03	w0.005	AT1
KLF4	RHOQ	TRUE	1	transfac_pro__M07461	3.03	w0.005	AT1
KLF4	RPL29	TRUE	1	transfac_pro__M07461	3.03	w0.005	AT1
KLF4	RPL41	TRUE	2	transfac_pro__M07461	3.03	w0.005	AT1
KLF4	RPS20	TRUE	1	transfac_pro__M07461	3.03	w0.005	AT1
KLF4	RUNX1	TRUE	1	transfac_pro__M07461	3.03	w0.005	AT1
KLF4	S100A9	TRUE	1	transfac_pro__M07461	3.03	w0.005	AT1
KLF4	SARS	TRUE	1	transfac_pro__M07461	3.03	w0.005	AT1
KLF4	SCPEP1	TRUE	2	transfac_pro__M07461	3.03	w0.005	AT1
KLF4	SEMA4A	TRUE	3	transfac_pro__M07461	3.03	w0.005	AT1
KLF4	SESN3	TRUE	3	transfac_pro__M07461	3.03	w0.005	AT1
KLF4	SETD3	TRUE	1	transfac_pro__M07461	3.03	w0.005	AT1
KLF4	SFN	TRUE	3	transfac_pro__M07461	3.03	w0.005	AT1
KLF4	SH3BGRL3	TRUE	2	transfac_pro__M07461	3.03	w0.005	AT1
KLF4	SLC25A25	TRUE	1	transfac_pro__M07461	3.03	w0.005	AT1
KLF4	SLC6A6	TRUE	6	transfac_pro__M07461	3.03	w0.005	AT1
KLF4	SLC7A5	TRUE	1	transfac_pro__M07461	3.03	w0.005	AT1
KLF4	SLPI	TRUE	4	transfac_pro__M07461	3.03	w0.005	AT1
KLF4	SNX30	TRUE	1	transfac_pro__M07461	3.03	w0.005	AT1
KLF4	SOCS2	TRUE	1	transfac_pro__M07461	3.03	w0.005	AT1
KLF4	SOCS3	TRUE	3	transfac_pro__M07461	3.03	w0.005	AT1
KLF4	SPRED2	TRUE	2	transfac_pro__M07461	3.03	w0.005	AT1
KLF4	SRGN	TRUE	1	transfac_pro__M07461	3.03	w0.005	AT1
KLF4	SRPK1	TRUE	1	transfac_pro__M07461	3.03	w0.005	AT1
KLF4	STXBP2	TRUE	3	transfac_pro__M07461	3.03	w0.005	AT1
KLF4	SYNC	TRUE	3	transfac_pro__M07461	3.03	w0.005	AT1
KLF4	TGIF1	TRUE	2	transfac_pro__M07461	3.03	w0.005	AT1
KLF4	TP53I3	TRUE	1	transfac_pro__M07461	3.03	w0.005	AT1
KLF4	TPRG1	TRUE	3	transfac_pro__M07461	3.03	w0.005	AT1
KLF4	TSC22D1	TRUE	2	transfac_pro__M07461	3.03	w0.005	AT1
KLF4	VIM	TRUE	4	transfac_pro__M07461	3.03	w0.005	AT1
KLF4	WEE1	TRUE	1	transfac_pro__M07461	3.03	w0.005	AT1
KLF4	ZFAND5	TRUE	1	transfac_pro__M07461	3.03	w0.005	AT1
KLF6	ATXN2	TRUE	1	transfac_pro__M07461	3.02	top5perTarget	AT1
KLF6	CLDN4	TRUE	1	transfac_pro__M07461	3.02	top5perTarget	AT1
KLF6	ELL2	TRUE	1	transfac_pro__M07461	3.02	top5perTarget	AT1
KLF6	EMP2	TRUE	1	transfac_pro__M07461	3.02	top5perTarget	AT1
KLF6	ERF	TRUE	1	transfac_pro__M07461	3.02	top5perTarget	AT1
KLF6	FOSB	TRUE	1	transfac_pro__M07461	3.02	top5perTarget	AT1
KLF6	ITGA3	TRUE	1	transfac_pro__M07461	3.02	top5perTarget	AT1
KLF6	KLF9	TRUE	1	transfac_pro__M07461	3.02	top5perTarget	AT1
KLF6	LMNA	TRUE	1	transfac_pro__M07461	3.02	top5perTarget	AT1
KLF6	MYADM	TRUE	1	transfac_pro__M07461	3.02	top5perTarget	AT1
KLF6	NCOR2	TRUE	1	transfac_pro__M07461	3.02	top5perTarget	AT1
KLF6	PAFAH1B1	TRUE	1	transfac_pro__M07461	3.02	top5perTarget	AT1
KLF6	RALGDS	TRUE	1	transfac_pro__M07461	3.02	top5perTarget	AT1
KLF6	SRF	TRUE	1	transfac_pro__M07461	3.02	top5perTarget	AT1
KLF6	TGIF1	TRUE	1	transfac_pro__M07461	3.02	top5perTarget	AT1
KLF6	TOB2	TRUE	1	transfac_pro__M07461	3.02	top5perTarget	AT1
KLF6	VAMP2	TRUE	1	transfac_pro__M07461	3.02	top5perTarget	AT1
KLF6	YWHAZ	TRUE	1	transfac_pro__M07461	3.02	top5perTarget	AT1
KLF6	ZFP36L1	TRUE	1	transfac_pro__M07461	3.02	top5perTarget	AT1
MAFF	BCL3	TRUE	11	hocomoco__MAFF_HUMAN.H11MO.0.B	3.57	top3sdAndtop10perTarget	AT1
MAFF	IER5	TRUE	8	hocomoco__MAFF_HUMAN.H11MO.0.B	3.57	top3sdAndtop10perTarget	AT1
MAFF	IRF1	TRUE	13	hocomoco__MAFF_HUMAN.H11MO.0.B	3.57	top3sdAndtop10perTarget	AT1
MAFF	MAFF	TRUE	14	hocomoco__MAFF_HUMAN.H11MO.0.B	3.57	top3sdAndtop10perTarget	AT1
MAFF	PHLDA2	TRUE	8	hocomoco__MAFF_HUMAN.H11MO.0.B	3.57	top3sdAndtop10perTarget	AT1
MAFF	TIPARP	TRUE	4	hocomoco__MAFF_HUMAN.H11MO.0.B	3.57	top3sdAndtop10perTarget	AT1
MAFF	TRIB1	TRUE	19	hocomoco__MAFF_HUMAN.H11MO.0.B	3.57	top3sdAndtop10perTarget	AT1
MAFF	SEMA4A	TRUE	8	hocomoco__MAFF_HUMAN.H11MO.1.B	3.54	top3sdAndtop10perTarget	AT1
MAFF	SFN	TRUE	18	hocomoco__MAFF_HUMAN.H11MO.1.B	3.54	top3sdAndtop10perTarget	AT1
MLX	C14orf132	TRUE	34	hocomoco__MLX_HUMAN.H11MO.0.D	4.14	top50	AT1
MLX	MDN1	TRUE	26	hocomoco__MLX_HUMAN.H11MO.0.D	4.14	top50	AT1
MLX	MLX	TRUE	44	hocomoco__MLX_HUMAN.H11MO.0.D	4.14	top50	AT1
MLX	NR1D1	TRUE	47	hocomoco__MLX_HUMAN.H11MO.0.D	4.14	top50	AT1
MLX	PRPF39	TRUE	44	hocomoco__MLX_HUMAN.H11MO.0.D	4.14	top50	AT1
MLX	TRIM73	TRUE	45	hocomoco__MLX_HUMAN.H11MO.0.D	4.14	top50	AT1
MLX	UBE2Q1	TRUE	46	hocomoco__MLX_HUMAN.H11MO.0.D	4.14	top50	AT1
MLX	ADK	TRUE	36	taipale_cyt_meth__MLX_YNCACGTGMYN_FL	3.69	top50	AT1
MLX	FAM160B1	TRUE	11	taipale_cyt_meth__MLX_YNCACGTGMYN_FL	3.69	top50	AT1
MLX	FPGS	TRUE	11	taipale_cyt_meth__MLX_YNCACGTGMYN_FL	3.69	top50	AT1
MLX	MARS	TRUE	8	taipale_cyt_meth__MLX_YNCACGTGMYN_FL	3.69	top50	AT1
MLX	TRPC4AP	TRUE	24	taipale_cyt_meth__MLX_YNCACGTGMYN_FL	3.69	top50	AT1
MLX	ACSS2	TRUE	3	cisbp__M0181	3.21	top50	AT1
MLX	AGTPBP1	TRUE	15	cisbp__M0181	3.21	top50	AT1
MLX	FAM167A	TRUE	13	cisbp__M0181	3.21	top50	AT1
MLX	NRP2	TRUE	13	cisbp__M0181	3.21	top50	AT1
MLX	XRN1	TRUE	2	cisbp__M0181	3.21	top50	AT1
NR1D1	ACACA	TRUE	8	hocomoco__NR1D1_HUMAN.H11MO.1.D	3.64	top50	AT1
NR1D1	CISH	TRUE	1	hocomoco__NR1D1_HUMAN.H11MO.1.D	3.64	top50	AT1
NR1D1	NR1D1	TRUE	10	hocomoco__NR1D1_HUMAN.H11MO.1.D	3.64	top50	AT1
NR1D1	NR1D2	TRUE	10	hocomoco__NR1D1_HUMAN.H11MO.1.D	3.64	top50	AT1
NR1D1	SRPK1	TRUE	9	hocomoco__NR1D1_HUMAN.H11MO.1.D	3.64	top50	AT1
NR1D1	CAPN8	TRUE	3	hocomoco__NR1D1_HUMAN.H11MO.0.B	3.17	top50	AT1
NR1D2	ACACA	TRUE	9	cisbp__M4937	3.93	top50	AT1
NR1D2	CLDN12	TRUE	3	cisbp__M4937	3.93	top50	AT1
NR1D2	IPO5	TRUE	6	cisbp__M4937	3.93	top50	AT1
NR1D2	MKLN1	TRUE	6	cisbp__M4937	3.93	top50	AT1
NR1D2	NR1D1	TRUE	9	cisbp__M4937	3.93	top50	AT1
NR1D2	NR1D2	TRUE	10	cisbp__M4937	3.93	top50	AT1
NR1D2	YIPF4	TRUE	2	cisbp__M4937	3.93	top50	AT1
NR1D2	SRPK1	TRUE	7	flyfactorsurvey__Eip75B_SANGER_5_FBgn0000568	3.34	top50	AT1
NR1D2	PIK3C2A	TRUE	2	transfac_pro__M07955	3.02	top50	AT1
PSMA6	CCL2	TRUE	1	hdpi__PSMA6	3.33	top3sd	AT1
PSMA6	CISH	TRUE	1	hdpi__PSMA6	3.33	top3sd	AT1
REL	BCL3	TRUE	126	bergman__dl-B	7.06	top50	AT1
REL	DUSP5	TRUE	78	bergman__dl-B	7.06	top50	AT1
REL	ETS1	TRUE	63	bergman__dl-B	7.06	top50	AT1
REL	GPBP1	TRUE	150	bergman__dl-B	7.06	top50	AT1
REL	GRASP	TRUE	25	bergman__dl-B	7.06	top50	AT1
REL	GYPC	TRUE	66	bergman__dl-B	7.06	top50	AT1
REL	IRF1	TRUE	130	bergman__dl-B	7.06	top50	AT1
REL	KLRD1	TRUE	11	bergman__dl-B	7.06	top50	AT1
REL	NR4A2	TRUE	99	bergman__dl-B	7.06	top50	AT1
REL	REL	TRUE	130	bergman__dl-B	7.06	top50	AT1
REL	SLC6A14	TRUE	79	bergman__dl-B	7.06	top50	AT1
REL	TNFAIP3	TRUE	146	bergman__dl-B	7.06	top50	AT1
REL	CCL5	TRUE	124	transfac_pro__M00774	6.34	top50	AT1
REL	CYBA	TRUE	31	transfac_pro__M00774	6.34	top50	AT1
REL	IL2RG	TRUE	30	transfac_pro__M00774	6.34	top50	AT1
REL	KDM6B	TRUE	66	transfac_pro__M00774	6.34	top50	AT1
REL	RGS1	TRUE	53	transfac_pro__M00774	6.34	top50	AT1
REL	SRGN	TRUE	25	transfac_pro__M00774	6.34	top50	AT1
REL	ELL2	TRUE	44	transfac_public__M00208	5.83	top10perTarget	AT1
REL	BCL2A1	TRUE	39	transfac_pro__M00774	5.72	top1sd	AT1
REL	CD69	TRUE	54	transfac_pro__M00774	5.72	top1sd	AT1
REL	DUSP2	TRUE	43	transfac_pro__M00774	5.72	top1sd	AT1
REL	HCST	TRUE	19	transfac_pro__M00774	5.72	top1sd	AT1
REL	IER5	TRUE	49	transfac_pro__M00774	5.72	top1sd	AT1
REL	IFRD1	TRUE	26	transfac_pro__M00774	5.72	top1sd	AT1
REL	LIMD2	TRUE	34	transfac_pro__M00774	5.72	top1sd	AT1
REL	LSP1	TRUE	63	transfac_pro__M00774	5.72	top1sd	AT1
REL	NFKBIA	TRUE	62	transfac_pro__M00774	5.72	top1sd	AT1
REL	NR4A3	TRUE	56	transfac_pro__M00774	5.72	top1sd	AT1
REL	RUNX3	TRUE	58	transfac_pro__M00774	5.72	top1sd	AT1
REL	SKIL	TRUE	54	transfac_pro__M00774	5.72	top1sd	AT1
REL	TNFRSF1B	TRUE	53	transfac_pro__M00774	5.72	top1sd	AT1
REL	YPEL5	TRUE	47	transfac_pro__M00774	5.72	top1sd	AT1
REL	ARHGDIB	TRUE	46	cisbp__M6449	5.68	top1sd	AT1
REL	BATF	TRUE	27	cisbp__M6449	5.68	top1sd	AT1
REL	COTL1	TRUE	17	cisbp__M6449	5.68	top1sd	AT1
REL	CREM	TRUE	37	cisbp__M6449	5.68	top1sd	AT1
REL	DDIT4	TRUE	10	cisbp__M6449	5.68	top1sd	AT1
REL	FYN	TRUE	31	cisbp__M6449	5.68	top1sd	AT1
REL	RALGDS	TRUE	47	cisbp__M6449	5.68	top1sd	AT1
REL	CAPN8	TRUE	2	transfac_public__M00194	5.62	top1sd	AT1
REL	CCL4	TRUE	7	transfac_public__M00194	5.62	top1sd	AT1
REL	CD37	TRUE	3	transfac_public__M00194	5.62	top1sd	AT1
REL	IFITM1	TRUE	3	transfac_public__M00194	5.62	top1sd	AT1
REL	ISG20	TRUE	7	transfac_public__M00194	5.62	top1sd	AT1
REL	LCN2	TRUE	15	transfac_public__M00194	5.62	top1sd	AT1
REL	RAC2	TRUE	5	transfac_public__M00194	5.62	top1sd	AT1
REL	RND1	TRUE	18	transfac_public__M00194	5.62	top1sd	AT1
REL	SYTL3	TRUE	28	jaspar__MA0101.1	5.35	top50	AT1
REL	FAM46C	TRUE	15	swissregulon__hs__NFKB1_REL_RELA.p2	5.09	top50	AT1
REL	GPR65	TRUE	13	transfac_pro__M07884	5.09	top10perTarget	AT1
REL	PLAUR	TRUE	3	swissregulon__hs__NFKB1_REL_RELA.p2	5.09	top50	AT1
REL	PTPRC	TRUE	9	transfac_pro__M07884	5.09	top10perTarget	AT1
REL	SAMSN1	TRUE	23	transfac_pro__M07884	5.09	top10perTarget	AT1
REL	SLA	TRUE	21	swissregulon__hs__NFKB1_REL_RELA.p2	5.09	top50	AT1
REL	STK4	TRUE	5	swissregulon__hs__NFKB1_REL_RELA.p2	5.09	top50	AT1
REL	TGFB1	TRUE	13	transfac_pro__M07884	5.09	top10perTarget	AT1
REL	SPON2	TRUE	3	transfac_pro__M07883	4.78	top3sd	AT1
REL	CXCR4	TRUE	21	cisbp__M3091	4.76	top50	AT1
REL	ATP1B3	TRUE	2	transfac_pro__M07885	4.54	top1sd	AT1
REL	CD53	TRUE	6	transfac_pro__M07885	4.54	top1sd	AT1
REL	CLEC2B	TRUE	1	transfac_pro__M07885	4.54	top1sd	AT1
REL	LYN	TRUE	24	transfac_pro__M07885	4.54	top1sd	AT1
REL	MYEF2	TRUE	2	transfac_pro__M07885	4.54	top1sd	AT1
REL	ZFP36L2	TRUE	4	flyfactorsurvey__dl_FlyReg_FBgn0000462	4.29	top1sd	AT1
REL	CST7	TRUE	20	jaspar__MA0023.1	4.28	top3sd	AT1
REL	ZNF331	TRUE	1	jaspar__MA0023.1	4.28	top3sd	AT1
REL	RBM38	TRUE	12	transfac_public__M00054	4.07	top1sd	AT1
REL	BTG1	TRUE	2	flyfactorsurvey__dl_NBT_FBgn0000462	4.02	top1sd	AT1
REL	CYTIP	TRUE	1	flyfactorsurvey__dl_NBT_FBgn0000462	4.02	top1sd	AT1
REL	GZMA	TRUE	2	flyfactorsurvey__dl_NBT_FBgn0000462	4.02	top1sd	AT1
REL	PABPC1	TRUE	5	flyfactorsurvey__dl_NBT_FBgn0000462	4.02	top1sd	AT1
REL	SLC7A5	TRUE	3	cisbp__M3091	3.93	top3sd	AT1
REL	ARID5A	TRUE	14	bergman__dl-B	3.81	top10perTarget	AT1
REL	GNLY	TRUE	3	transfac_public__M00043	3.59	top50	AT1
REL	DDX3X	TRUE	1	jaspar__MA0022.1	3.03	top1sd	AT1
RFX2	LMNA	TRUE	44	transfac_pro__M07305	4.23	top3sd	AT1
RFX2	MYADM	TRUE	42	transfac_pro__M07305	4.23	top3sd	AT1
RFX2	RALGDS	TRUE	44	transfac_pro__M07305	4.23	top3sd	AT1
RFX2	RFX2	TRUE	9	transfac_pro__M07305	4.23	top3sd	AT1
RFX2	RRAD	TRUE	46	transfac_pro__M07305	4.23	top3sd	AT1
RFX2	SRF	TRUE	13	transfac_pro__M07305	4.23	top3sd	AT1
RFX2	CRIP2	TRUE	23	yetfasco__YLR176C_1478	3.69	top1sd	AT1
RFX2	DPY19L1	TRUE	3	yetfasco__YLR176C_1478	3.69	top1sd	AT1
RFX2	FHL1	TRUE	22	yetfasco__YLR176C_1478	3.69	top1sd	AT1
RFX2	KDM6B	TRUE	23	yetfasco__YLR176C_1478	3.69	top1sd	AT1
RFX2	PCF11	TRUE	23	yetfasco__YLR176C_1478	3.69	top1sd	AT1
RFX2	RAB31	TRUE	5	yetfasco__YLR176C_1478	3.69	top1sd	AT1
RFX2	RASEF	TRUE	22	yetfasco__YLR176C_1478	3.69	top1sd	AT1
RFX2	RGS16	TRUE	23	yetfasco__YLR176C_1478	3.69	top1sd	AT1
RFX2	RUNX1	TRUE	9	yetfasco__YLR176C_1478	3.69	top1sd	AT1
RFX2	SH3RF1	TRUE	21	yetfasco__YLR176C_1478	3.69	top1sd	AT1
RFX2	SLC25A25	TRUE	15	yetfasco__YLR176C_1478	3.69	top1sd	AT1
RFX2	TIPARP	TRUE	1	yetfasco__YLR176C_1478	3.69	top1sd	AT1
RFX2	C3orf58	TRUE	4	hocomoco__RFX2_HUMAN.H11MO.0.A	3.28	top3sd	AT1
RFX2	MLF1	TRUE	6	hocomoco__RFX2_HUMAN.H11MO.0.A	3.28	top3sd	AT1
RFX2	SLC30A1	TRUE	8	hocomoco__RFX2_HUMAN.H11MO.0.A	3.28	top3sd	AT1
RFX2	ABCC3	TRUE	3	taipale_cyt_meth__RFX2_NGTTRCCATGGYAACN_eDBD_meth	3.09	top1sd	AT1
RFX2	ITSN2	TRUE	2	taipale_cyt_meth__RFX2_NGTTRCCATGGYAACN_eDBD_meth	3.09	top1sd	AT1
RREB1	BCL9L	TRUE	1	swissregulon__hs__RREB1.p2	3.57	top50	AT1
RREB1	HIF1A	TRUE	1	swissregulon__hs__RREB1.p2	3.57	top50	AT1
RREB1	LMO3	TRUE	2	swissregulon__hs__RREB1.p2	3.57	top50	AT1
RREB1	LNX2	TRUE	1	swissregulon__hs__RREB1.p2	3.57	top50	AT1
RREB1	RREB1	TRUE	1	swissregulon__hs__RREB1.p2	3.57	top50	AT1
RREB1	SLC34A2	TRUE	2	swissregulon__hs__RREB1.p2	3.57	top50	AT1
RREB1	WWC1	TRUE	2	swissregulon__hs__RREB1.p2	3.57	top50	AT1
RREB1	FAM135A	TRUE	1	cisbp__M3843	3.11	top50perTargetAndtop1sd	AT1
RREB1	PLXNA2	TRUE	1	cisbp__M3843	3.11	top50perTargetAndtop1sd	AT1
RREB1	RNF145	TRUE	1	cisbp__M3843	3.11	top50perTargetAndtop1sd	AT1
RREB1	SH3D19	TRUE	1	cisbp__M3843	3.11	top50perTargetAndtop1sd	AT1
RREB1	TENC1	TRUE	1	cisbp__M3843	3.11	top50perTargetAndtop1sd	AT1
RREB1	ZDHHC21	TRUE	1	cisbp__M3843	3.11	top50perTargetAndtop1sd	AT1
RUNX1	GNA11	TRUE	1	transfac_pro__M00769	3.54	top50	AT1
RUNX1	GNG12	TRUE	3	transfac_pro__M00769	3.54	top50	AT1
RUNX1	RUNX1	TRUE	7	transfac_pro__M00769	3.54	top50	AT1
RUNX1	SKIL	TRUE	4	transfac_pro__M00769	3.54	top50	AT1
RUNX1	TIPARP	TRUE	1	transfac_pro__M00769	3.54	top50	AT1
RUNX3	CD2	TRUE	42	transfac_pro__M08866	8.82	top5perTarget	AT1
RUNX3	CD3G	TRUE	24	transfac_pro__M08866	8.82	top5perTarget	AT1
RUNX3	CD69	TRUE	33	transfac_pro__M08866	8.82	top5perTarget	AT1
RUNX3	CD7	TRUE	28	transfac_pro__M08866	8.82	top5perTarget	AT1
RUNX3	CREM	TRUE	25	transfac_pro__M08866	8.82	top5perTarget	AT1
RUNX3	CST7	TRUE	36	transfac_pro__M08866	8.82	top5perTarget	AT1
RUNX3	CXCR4	TRUE	28	transfac_pro__M08866	8.82	top5perTarget	AT1
RUNX3	CYTIP	TRUE	64	transfac_pro__M08866	8.82	top5perTarget	AT1
RUNX3	ETS1	TRUE	51	transfac_pro__M08866	8.82	top5perTarget	AT1
RUNX3	GYPC	TRUE	41	transfac_pro__M08866	8.82	top5perTarget	AT1
RUNX3	GZMA	TRUE	51	transfac_pro__M08866	8.82	top5perTarget	AT1
RUNX3	GZMB	TRUE	57	transfac_pro__M08866	8.82	top5perTarget	AT1
RUNX3	GZMH	TRUE	37	transfac_pro__M08866	8.82	top5perTarget	AT1
RUNX3	GZMK	TRUE	42	transfac_pro__M08866	8.82	top5perTarget	AT1
RUNX3	GZMM	TRUE	21	transfac_pro__M08866	8.82	top5perTarget	AT1
RUNX3	IL2RG	TRUE	27	transfac_pro__M08866	8.82	top5perTarget	AT1
RUNX3	IL7R	TRUE	49	transfac_pro__M08866	8.82	top5perTarget	AT1
RUNX3	KLRB1	TRUE	36	transfac_pro__M08866	8.82	top5perTarget	AT1
RUNX3	LCK	TRUE	32	transfac_pro__M08866	8.82	top5perTarget	AT1
RUNX3	LSP1	TRUE	47	transfac_pro__M08866	8.82	top5perTarget	AT1
RUNX3	NKG7	TRUE	53	transfac_pro__M08866	8.82	top5perTarget	AT1
RUNX3	PRF1	TRUE	31	transfac_pro__M08866	8.82	top5perTarget	AT1
RUNX3	RAC2	TRUE	36	transfac_pro__M08866	8.82	top5perTarget	AT1
RUNX3	RGS1	TRUE	49	transfac_pro__M08866	8.82	top5perTarget	AT1
RUNX3	RUNX3	TRUE	62	transfac_pro__M08866	8.82	top5perTarget	AT1
RUNX3	SLA	TRUE	58	transfac_pro__M08866	8.82	top5perTarget	AT1
RUNX3	SYTL3	TRUE	57	transfac_pro__M08866	8.82	top5perTarget	AT1
RUNX3	TSC22D3	TRUE	38	transfac_pro__M08866	8.82	top5perTarget	AT1
RUNX3	CCL4	TRUE	31	hocomoco__RUNX3_HUMAN.H11MO.0.A	6.68	top5perTarget	AT1
RUNX3	CD53	TRUE	17	hocomoco__RUNX3_HUMAN.H11MO.0.A	6.68	top5perTarget	AT1
RUNX3	EMP3	TRUE	1	hocomoco__RUNX3_HUMAN.H11MO.0.A	6.68	top5perTarget	AT1
RUNX3	HCST	TRUE	24	hocomoco__RUNX3_HUMAN.H11MO.0.A	6.68	top5perTarget	AT1
RUNX3	IFITM1	TRUE	4	hocomoco__RUNX3_HUMAN.H11MO.0.A	6.68	top5perTarget	AT1
RUNX3	KLRD1	TRUE	17	hocomoco__RUNX3_HUMAN.H11MO.0.A	6.68	top5perTarget	AT1
RUNX3	LEPROTL1	TRUE	17	hocomoco__RUNX3_HUMAN.H11MO.0.A	6.68	top5perTarget	AT1
RUNX3	SH2D2A	TRUE	9	hocomoco__RUNX3_HUMAN.H11MO.0.A	6.68	top5perTarget	AT1
RUNX3	SOCS1	TRUE	17	hocomoco__RUNX3_HUMAN.H11MO.0.A	6.68	top5perTarget	AT1
RUNX3	SRGN	TRUE	13	hocomoco__RUNX3_HUMAN.H11MO.0.A	6.68	top5perTarget	AT1
RUNX3	STK4	TRUE	31	hocomoco__RUNX3_HUMAN.H11MO.0.A	6.68	top5perTarget	AT1
RUNX3	TGFB1	TRUE	19	hocomoco__RUNX3_HUMAN.H11MO.0.A	6.68	top5perTarget	AT1
RUNX3	CD3E	TRUE	1	transfac_pro__M07372	6.53	top5perTarget	AT1
RUNX3	DUSP2	TRUE	3	transfac_pro__M07372	6.53	top5perTarget	AT1
RUNX3	FXYD5	TRUE	3	transfac_pro__M07372	6.53	top5perTarget	AT1
RUNX3	GNLY	TRUE	10	transfac_pro__M07372	6.53	top5perTarget	AT1
RUNX3	SH3BGRL3	TRUE	1	transfac_pro__M07372	6.53	top5perTarget	AT1
RUNX3	CCL5	TRUE	1	cisbp__M6459	4.8	top50Andtop3sd	AT1
RUNX3	CD37	TRUE	11	cisbp__M6459	4.8	top50Andtop3sd	AT1
RUNX3	CNOT6L	TRUE	2	cisbp__M6459	4.8	top50Andtop3sd	AT1
RUNX3	FYN	TRUE	12	cisbp__M6459	4.8	top50Andtop3sd	AT1
RUNX3	PTPRCAP	TRUE	3	cisbp__M6459	4.8	top50Andtop3sd	AT1
RUNX3	SPON2	TRUE	6	hocomoco__RUNX3_MOUSE.H11MO.0.A	4.41	top50Andtop3sd	AT1
RUNX3	ARHGDIB	TRUE	5	transfac_pro__M00769	3.43	top50Andtop3sd	AT1
RUNX3	GPR65	TRUE	5	transfac_pro__M00769	3.43	top50Andtop3sd	AT1
RUNX3	CORO1A	TRUE	1	tfdimers__MD00509	3.15	top50Andtop3sd	AT1
RUNX3	DDIT4	TRUE	4	tfdimers__MD00509	3.15	top50Andtop3sd	AT1
RUNX3	LIMD2	TRUE	1	tfdimers__MD00509	3.15	top50Andtop3sd	AT1
RUNX3	PTPRC	TRUE	2	transfac_pro__M01814	3.05	top50Andtop3sd	AT1
SF1	CHD9	TRUE	1	hdpi__SF1	3.59	top50	AT1
SF1	EMD	TRUE	1	hdpi__SF1	3.59	top50	AT1
SF1	FUS	TRUE	1	hdpi__SF1	3.59	top50	AT1
SF1	GLS	TRUE	1	hdpi__SF1	3.59	top50	AT1
SF1	GPBP1	TRUE	1	hdpi__SF1	3.59	top50	AT1
SF1	HNRNPL	TRUE	1	hdpi__SF1	3.59	top50	AT1
SF1	MARK3	TRUE	1	hdpi__SF1	3.59	top50	AT1
SF1	PPP3CA	TRUE	1	hdpi__SF1	3.59	top50	AT1
SF1	REL	TRUE	1	hdpi__SF1	3.59	top50	AT1
SF1	SEMA4B	TRUE	1	hdpi__SF1	3.59	top50	AT1
SF1	SF1	TRUE	1	hdpi__SF1	3.59	top50	AT1
SF1	SMG1	TRUE	1	hdpi__SF1	3.59	top50	AT1
SF1	WSB1	TRUE	1	hdpi__SF1	3.59	top50	AT1
SF1	YWHAZ	TRUE	1	hdpi__SF1	3.59	top50	AT1
SOX4	ARHGAP18	TRUE	3	tfdimers__MD00293	4.1	top1sd	AT1
SOX4	FMN1	TRUE	3	tfdimers__MD00293	4.1	top1sd	AT1
SOX4	HES1	TRUE	4	tfdimers__MD00293	4.1	top1sd	AT1
SOX4	IER5L	TRUE	7	tfdimers__MD00293	4.1	top1sd	AT1
SOX4	MARCKSL1	TRUE	4	tfdimers__MD00293	4.1	top1sd	AT1
SOX4	SPARC	TRUE	3	tfdimers__MD00293	4.1	top1sd	AT1
SOX4	CLDN12	TRUE	1	hocomoco__SOX4_HUMAN.H11MO.0.B	3.36	top1sd	AT1
SOX4	COL4A2	TRUE	1	hocomoco__SOX4_HUMAN.H11MO.0.B	3.36	top1sd	AT1
SOX4	DSP	TRUE	1	hocomoco__SOX4_HUMAN.H11MO.0.B	3.36	top1sd	AT1
SOX4	FAM160B1	TRUE	2	hocomoco__SOX4_HUMAN.H11MO.0.B	3.36	top1sd	AT1
SOX4	FAM167A	TRUE	2	hocomoco__SOX4_HUMAN.H11MO.0.B	3.36	top1sd	AT1
SOX4	GADD45A	TRUE	1	hocomoco__SOX4_HUMAN.H11MO.0.B	3.36	top1sd	AT1
SOX4	HSPH1	TRUE	2	hocomoco__SOX4_HUMAN.H11MO.0.B	3.36	top1sd	AT1
SOX4	KANK2	TRUE	3	hocomoco__SOX4_HUMAN.H11MO.0.B	3.36	top1sd	AT1
SOX4	LBH	TRUE	2	hocomoco__SOX4_HUMAN.H11MO.0.B	3.36	top1sd	AT1
SOX4	MAFB	TRUE	4	hocomoco__SOX4_HUMAN.H11MO.0.B	3.36	top1sd	AT1
SOX4	MDK	TRUE	4	hocomoco__SOX4_HUMAN.H11MO.0.B	3.36	top1sd	AT1
SOX4	MECOM	TRUE	2	hocomoco__SOX4_HUMAN.H11MO.0.B	3.36	top1sd	AT1
SOX4	MSRB3	TRUE	1	hocomoco__SOX4_HUMAN.H11MO.0.B	3.36	top1sd	AT1
SOX4	NF1	TRUE	2	hocomoco__SOX4_HUMAN.H11MO.0.B	3.36	top1sd	AT1
SOX4	PHC2	TRUE	1	hocomoco__SOX4_HUMAN.H11MO.0.B	3.36	top1sd	AT1
SOX4	SDPR	TRUE	2	hocomoco__SOX4_HUMAN.H11MO.0.B	3.36	top1sd	AT1
SOX4	SERINC2	TRUE	2	hocomoco__SOX4_HUMAN.H11MO.0.B	3.36	top1sd	AT1
SOX4	SERPINA1	TRUE	3	hocomoco__SOX4_HUMAN.H11MO.0.B	3.36	top1sd	AT1
SOX4	SERPINH1	TRUE	1	hocomoco__SOX4_HUMAN.H11MO.0.B	3.36	top1sd	AT1
SOX4	SIPA1L1	TRUE	2	hocomoco__SOX4_HUMAN.H11MO.0.B	3.36	top1sd	AT1
SOX4	SLC38A2	TRUE	1	hocomoco__SOX4_HUMAN.H11MO.0.B	3.36	top1sd	AT1
SOX4	SOX4	TRUE	2	hocomoco__SOX4_HUMAN.H11MO.0.B	3.36	top1sd	AT1
SOX4	SOX9	TRUE	3	hocomoco__SOX4_HUMAN.H11MO.0.B	3.36	top1sd	AT1
SOX4	SPRY1	TRUE	1	hocomoco__SOX4_HUMAN.H11MO.0.B	3.36	top1sd	AT1
SOX4	TLE4	TRUE	2	hocomoco__SOX4_HUMAN.H11MO.0.B	3.36	top1sd	AT1
SOX4	TUBA1A	TRUE	3	hocomoco__SOX4_HUMAN.H11MO.0.B	3.36	top1sd	AT1
SOX4	TXNIP	TRUE	2	hocomoco__SOX4_HUMAN.H11MO.0.B	3.36	top1sd	AT1
SOX4	UBE2Q1	TRUE	2	hocomoco__SOX4_HUMAN.H11MO.0.B	3.36	top1sd	AT1
SOX4	CDKN1C	TRUE	2	taipale_cyt_meth__SOX4_GAACAAAGRN_eDBD_repr	3.26	top10perTarget	AT1
SOX9	MARCKSL1	TRUE	13	cisbp__M6478	3.76	top50perTarget	AT1
SOX9	MDK	TRUE	14	cisbp__M6478	3.76	top50perTarget	AT1
SOX9	PER2	TRUE	13	cisbp__M6478	3.76	top50perTarget	AT1
SOX9	WEE1	TRUE	10	cisbp__M6478	3.76	top50perTarget	AT1
SRF	ERRFI1	TRUE	39	dbcorrdb__SRF__ENCSR000BIV_1__m1	9.7	top50perTarget	AT1
SRF	HBEGF	TRUE	44	cisbp__M3952	9.37	top50perTarget	AT1
SRF	WEE1	TRUE	27	transfac_public__M00152	9.35	top50perTarget	AT1
SRF	GBP1	TRUE	44	dbcorrdb__SRF__ENCSR000BLV_1__m1	9.25	top50perTarget	AT1
SRF	LDLR	TRUE	23	taipale__SRF_DBD_MCCATATAWGGN_repr	9.25	top50perTarget	AT1
SRF	NTM	TRUE	75	taipale__SRF_DBD_MCCATATAWGGN_repr	9.25	top50perTarget	AT1
SRF	TIPARP	TRUE	20	taipale__SRF_DBD_MCCATATAWGGN_repr	9.25	top50perTarget	AT1
SRF	SLC25A25	TRUE	39	transfac_pro__M00810	9.11	top50perTarget	AT1
SRF	C6orf132	TRUE	5	transfac_pro__M00922	9.02	top50perTarget	AT1
SRF	ZDHHC9	TRUE	12	factorbook__SRF	8.12	top50perTarget	AT1
SRF	USP54	TRUE	4	cisbp__M3960	7.42	top50perTarget	AT1
SRF	RCAN1	TRUE	44	transfac_pro__M07618	7.3	top50perTarget	AT1
SRF	SERTAD3	TRUE	27	transfac_pro__M07618	7.3	top50perTarget	AT1
SRF	ZFP36	TRUE	16	factorbook__SRF	7.16	top50perTarget	AT1
SRF	FAM46B	TRUE	21	cisbp__M4512	7.01	top50perTarget	AT1
SRF	FPGS	TRUE	10	swissregulon__hs__SRF.p3	6.65	top50perTarget	AT1
SRF	ICAM4	TRUE	6	swissregulon__hs__SRF.p3	6.65	top50perTarget	AT1
SRF	MT1G	TRUE	8	swissregulon__hs__SRF.p3	6.65	top50perTarget	AT1
SRF	RFX2	TRUE	4	cisbp__M1300	4.88	top50perTarget	AT1
SRF	H1F0	TRUE	4	cisbp__M1298	4.8	top50perTarget	AT1
SRF	CDKL5	TRUE	6	cisbp__M1300	4.25	top50	AT1
SRF	KLK5	TRUE	1	cisbp__M1300	4.25	top50	AT1
SRF	PER2	TRUE	6	cisbp__M1300	4.25	top50	AT1
SRF	PIM1	TRUE	4	cisbp__M1300	4.25	top50	AT1
SRF	IER3	TRUE	2	cisbp__M2464	3.49	top50	AT1
SRF	SMPD1	TRUE	1	cisbp__M2464	3.49	top50	AT1
SRF	ADAM9	TRUE	1	dbcorrdb__SRF__ENCSR000BGE_1__m3	3.09	w0.005	AT1
SRF	ANKRD13A	TRUE	1	dbcorrdb__SRF__ENCSR000BGE_1__m3	3.09	w0.005	AT1
SRF	ARL6IP5	TRUE	1	dbcorrdb__SRF__ENCSR000BGE_1__m3	3.09	w0.005	AT1
SRF	C1orf116	TRUE	1	dbcorrdb__SRF__ENCSR000BGE_1__m3	3.09	w0.005	AT1
SRF	CDH1	TRUE	1	dbcorrdb__SRF__ENCSR000BGE_1__m3	3.09	w0.005	AT1
SRF	CDV3	TRUE	1	dbcorrdb__SRF__ENCSR000BGE_1__m3	3.09	w0.005	AT1
SRF	CELF1	TRUE	1	dbcorrdb__SRF__ENCSR000BGE_1__m3	3.09	w0.005	AT1
SRF	CUTA	TRUE	1	dbcorrdb__SRF__ENCSR000BGE_1__m3	3.09	w0.005	AT1
SRF	DIAPH1	TRUE	1	dbcorrdb__SRF__ENCSR000BGE_1__m3	3.09	w0.005	AT1
SRF	DICER1	TRUE	1	dbcorrdb__SRF__ENCSR000BGE_1__m3	3.09	w0.005	AT1
SRF	DUSP7	TRUE	1	dbcorrdb__SRF__ENCSR000BGE_1__m3	3.09	w0.005	AT1
SRF	EIF4G1	TRUE	1	dbcorrdb__SRF__ENCSR000BGE_1__m3	3.09	w0.005	AT1
SRF	EIF5	TRUE	1	dbcorrdb__SRF__ENCSR000BGE_1__m3	3.09	w0.005	AT1
SRF	ELL2	TRUE	1	dbcorrdb__SRF__ENCSR000BGE_1__m3	3.09	w0.005	AT1
SRF	FDPS	TRUE	1	dbcorrdb__SRF__ENCSR000BGE_1__m3	3.09	w0.005	AT1
SRF	GADD45B	TRUE	1	dbcorrdb__SRF__ENCSR000BGE_1__m3	3.09	w0.005	AT1
SRF	GART	TRUE	1	dbcorrdb__SRF__ENCSR000BGE_1__m3	3.09	w0.005	AT1
SRF	GLS	TRUE	1	dbcorrdb__SRF__ENCSR000BGE_1__m3	3.09	w0.005	AT1
SRF	HERC2	TRUE	1	dbcorrdb__SRF__ENCSR000BGE_1__m3	3.09	w0.005	AT1
SRF	HES1	TRUE	1	dbcorrdb__SRF__ENCSR000BGE_1__m3	3.09	w0.005	AT1
SRF	HIST1H1C	TRUE	1	dbcorrdb__SRF__ENCSR000BGE_1__m3	3.09	w0.005	AT1
SRF	HNRNPA0	TRUE	1	dbcorrdb__SRF__ENCSR000BGE_1__m3	3.09	w0.005	AT1
SRF	HNRNPR	TRUE	1	dbcorrdb__SRF__ENCSR000BGE_1__m3	3.09	w0.005	AT1
SRF	HSD17B12	TRUE	1	dbcorrdb__SRF__ENCSR000BGE_1__m3	3.09	w0.005	AT1
SRF	IBTK	TRUE	1	dbcorrdb__SRF__ENCSR000BGE_1__m3	3.09	w0.005	AT1
SRF	ID4	TRUE	1	dbcorrdb__SRF__ENCSR000BGE_1__m3	3.09	w0.005	AT1
SRF	IFRD1	TRUE	1	dbcorrdb__SRF__ENCSR000BGE_1__m3	3.09	w0.005	AT1
SRF	KIF1B	TRUE	1	dbcorrdb__SRF__ENCSR000BGE_1__m3	3.09	w0.005	AT1
SRF	LSS	TRUE	1	dbcorrdb__SRF__ENCSR000BGE_1__m3	3.09	w0.005	AT1
SRF	MICAL2	TRUE	1	dbcorrdb__SRF__ENCSR000BGE_1__m3	3.09	w0.005	AT1
SRF	MLEC	TRUE	1	dbcorrdb__SRF__ENCSR000BGE_1__m3	3.09	w0.005	AT1
SRF	MTMR12	TRUE	1	dbcorrdb__SRF__ENCSR000BGE_1__m3	3.09	w0.005	AT1
SRF	MTR	TRUE	1	dbcorrdb__SRF__ENCSR000BGE_1__m3	3.09	w0.005	AT1
SRF	NDUFS8	TRUE	1	dbcorrdb__SRF__ENCSR000BGE_1__m3	3.09	w0.005	AT1
SRF	NEU1	TRUE	1	dbcorrdb__SRF__ENCSR000BGE_1__m3	3.09	w0.005	AT1
SRF	NF1	TRUE	1	dbcorrdb__SRF__ENCSR000BGE_1__m3	3.09	w0.005	AT1
SRF	NFE2L1	TRUE	1	dbcorrdb__SRF__ENCSR000BGE_1__m3	3.09	w0.005	AT1
SRF	NPC2	TRUE	1	dbcorrdb__SRF__ENCSR000BGE_1__m3	3.09	w0.005	AT1
SRF	PACSIN2	TRUE	1	dbcorrdb__SRF__ENCSR000BGE_1__m3	3.09	w0.005	AT1
SRF	PITRM1	TRUE	1	dbcorrdb__SRF__ENCSR000BGE_1__m3	3.09	w0.005	AT1
SRF	PLEKHH2	TRUE	1	dbcorrdb__SRF__ENCSR000BGE_1__m3	3.09	w0.005	AT1
SRF	PLK3	TRUE	1	dbcorrdb__SRF__ENCSR000BGE_1__m3	3.09	w0.005	AT1
SRF	PPP3CA	TRUE	1	dbcorrdb__SRF__ENCSR000BGE_1__m3	3.09	w0.005	AT1
SRF	PRKCZ	TRUE	1	dbcorrdb__SRF__ENCSR000BGE_1__m3	3.09	w0.005	AT1
SRF	RAB6A	TRUE	1	dbcorrdb__SRF__ENCSR000BGE_1__m3	3.09	w0.005	AT1
SRF	RBMS3	TRUE	1	dbcorrdb__SRF__ENCSR000BGE_1__m3	3.09	w0.005	AT1
SRF	RGS16	TRUE	1	dbcorrdb__SRF__ENCSR000BGE_1__m3	3.09	w0.005	AT1
SRF	RIF1	TRUE	1	dbcorrdb__SRF__ENCSR000BGE_1__m3	3.09	w0.005	AT1
SRF	RIMKLA	TRUE	1	dbcorrdb__SRF__ENCSR000BGE_1__m3	3.09	w0.005	AT1
SRF	RUNX1	TRUE	1	dbcorrdb__SRF__ENCSR000BGE_1__m3	3.09	w0.005	AT1
SRF	SF1	TRUE	1	dbcorrdb__SRF__ENCSR000BGE_1__m3	3.09	w0.005	AT1
SRF	TALDO1	TRUE	1	dbcorrdb__SRF__ENCSR000BGE_1__m3	3.09	w0.005	AT1
SRF	TCERG1	TRUE	1	dbcorrdb__SRF__ENCSR000BGE_1__m3	3.09	w0.005	AT1
SRF	TES	TRUE	1	dbcorrdb__SRF__ENCSR000BGE_1__m3	3.09	w0.005	AT1
SRF	TGIF1	TRUE	1	dbcorrdb__SRF__ENCSR000BGE_1__m3	3.09	w0.005	AT1
SRF	TLE4	TRUE	1	dbcorrdb__SRF__ENCSR000BGE_1__m3	3.09	w0.005	AT1
SRF	TMEM33	TRUE	1	dbcorrdb__SRF__ENCSR000BGE_1__m3	3.09	w0.005	AT1
SRF	TSPYL2	TRUE	1	dbcorrdb__SRF__ENCSR000BGE_1__m3	3.09	w0.005	AT1
SRF	VKORC1L1	TRUE	1	dbcorrdb__SRF__ENCSR000BGE_1__m3	3.09	w0.005	AT1
SRF	WBP2	TRUE	1	dbcorrdb__SRF__ENCSR000BGE_1__m3	3.09	w0.005	AT1
SRF	YPEL5	TRUE	1	dbcorrdb__SRF__ENCSR000BGE_1__m3	3.09	w0.005	AT1
SRF	YWHAZ	TRUE	1	dbcorrdb__SRF__ENCSR000BGE_1__m3	3.09	w0.005	AT1
SRF	ACTB	TRUE	131	cisbp__M6489	10.5	top50perTarget	AT1
SRF	ACTG1	TRUE	125	cisbp__M6489	10.5	top50perTarget	AT1
SRF	CNN2	TRUE	39	cisbp__M6489	10.5	top50perTarget	AT1
SRF	CTGF	TRUE	64	cisbp__M6489	10.5	top50perTarget	AT1
SRF	CYR61	TRUE	62	cisbp__M6489	10.5	top50perTarget	AT1
SRF	EGR1	TRUE	123	cisbp__M6489	10.5	top50perTarget	AT1
SRF	FOSB	TRUE	109	cisbp__M6489	10.5	top50perTarget	AT1
SRF	FOSL1	TRUE	64	cisbp__M6489	10.5	top50perTarget	AT1
SRF	LBH	TRUE	47	cisbp__M6489	10.5	top50perTarget	AT1
SRF	MYADM	TRUE	102	cisbp__M6489	10.5	top50perTarget	AT1
SRF	SLC30A1	TRUE	36	cisbp__M6489	10.5	top50perTarget	AT1
SRF	SRF	TRUE	76	cisbp__M6489	10.5	top50perTarget	AT1
SRF	TAGLN	TRUE	109	cisbp__M6489	10.5	top50perTarget	AT1
SRF	VPS37B	TRUE	32	cisbp__M6489	10.5	top50perTarget	AT1
SRF	C3orf58	TRUE	87	transfac_pro__M07862	10.2	top50perTarget	AT1
SRF	PCF11	TRUE	28	transfac_pro__M07862	10.2	top50perTarget	AT1
TGIF1	ATF3	TRUE	3	cisbp__M1136	4.06	top50perTarget	AT1
TGIF1	CCDC47	TRUE	3	cisbp__M1136	4.06	top50perTarget	AT1
TGIF1	DUSP1	TRUE	3	cisbp__M1136	4.06	top50perTarget	AT1
TGIF1	EIF5	TRUE	2	cisbp__M1136	4.06	top50perTarget	AT1
TGIF1	ELL2	TRUE	3	cisbp__M1136	4.06	top50perTarget	AT1
TGIF1	FOSB	TRUE	3	cisbp__M1136	4.06	top50perTarget	AT1
TGIF1	ID1	TRUE	3	cisbp__M1136	4.06	top50perTarget	AT1
TGIF1	JUND	TRUE	3	cisbp__M1136	4.06	top50perTarget	AT1
TGIF1	KLF9	TRUE	3	cisbp__M1136	4.06	top50perTarget	AT1
TGIF1	NR4A3	TRUE	4	cisbp__M1136	4.06	top50perTarget	AT1
TGIF1	PER1	TRUE	3	cisbp__M1136	4.06	top50perTarget	AT1
TGIF1	PER2	TRUE	3	cisbp__M1136	4.06	top50perTarget	AT1
TGIF1	VPS37B	TRUE	3	cisbp__M1136	4.06	top50perTarget	AT1
TGIF1	YWHAZ	TRUE	3	cisbp__M1136	4.06	top50perTarget	AT1
VDR	CD163	TRUE	1	tfdimers__MD00324	4.99	top3sd	AT1
VDR	PGC	TRUE	1	tfdimers__MD00324	4.99	top3sd	AT1
VDR	RPS6KA2	TRUE	1	tfdimers__MD00324	4.99	top3sd	AT1
VDR	VDR	TRUE	1	tfdimers__MD00324	4.99	top3sd	AT1
ZNF493	APBB2	TRUE	1	transfac_pro__M06419	4.3	top1sd	AT1
ZNF493	CDKL5	TRUE	1	transfac_pro__M06419	4.3	top1sd	AT1
ZNF493	EPB41L3	TRUE	1	transfac_pro__M06419	4.3	top1sd	AT1
ZNF493	IGF2R	TRUE	1	transfac_pro__M06419	4.3	top1sd	AT1
ZNF493	KIAA0020	TRUE	1	transfac_pro__M06419	4.3	top1sd	AT1
ZNF493	NRP2	TRUE	1	transfac_pro__M06419	4.3	top1sd	AT1
ZNF493	PLXNA2	TRUE	1	transfac_pro__M06419	4.3	top1sd	AT1
ZNF493	SGMS1	TRUE	1	transfac_pro__M06419	4.3	top1sd	AT1
ZNF493	SNX24	TRUE	1	transfac_pro__M06419	4.3	top1sd	AT1
ZNF493	TENC1	TRUE	1	transfac_pro__M06419	4.3	top1sd	AT1
ZNF493	UBE2Q1	TRUE	1	transfac_pro__M06419	4.3	top1sd	AT1
ZNF493	UGGT1	TRUE	1	transfac_pro__M06419	4.3	top1sd	AT1
BATF	ANXA1	TRUE	78	factorbook__AP1	3.14	w0.001	AT2
BATF	ANXA2	TRUE	52	factorbook__AP1	3.14	w0.001	AT2
BATF	ARCN1	TRUE	31	factorbook__AP1	3.14	w0.001	AT2
BATF	ARHGDIB	TRUE	39	factorbook__AP1	3.14	w0.001	AT2
BATF	ARID5A	TRUE	35	factorbook__AP1	3.14	w0.001	AT2
BATF	ARID5B	TRUE	10	factorbook__AP1	3.14	w0.001	AT2
BATF	BAG3	TRUE	76	factorbook__AP1	3.14	w0.001	AT2
BATF	BCL3	TRUE	62	factorbook__AP1	3.14	w0.001	AT2
BATF	BHLHE40	TRUE	60	factorbook__AP1	3.14	w0.001	AT2
BATF	CD53	TRUE	49	factorbook__AP1	3.14	w0.001	AT2
BATF	CSF3	TRUE	35	factorbook__AP1	3.14	w0.001	AT2
BATF	CSRNP1	TRUE	74	factorbook__AP1	3.14	w0.001	AT2
BATF	CYTIP	TRUE	28	factorbook__AP1	3.14	w0.001	AT2
BATF	DUSP5	TRUE	63	factorbook__AP1	3.14	w0.001	AT2
BATF	DYNC1H1	TRUE	54	factorbook__AP1	3.14	w0.001	AT2
BATF	EEF1A1	TRUE	37	factorbook__AP1	3.14	w0.001	AT2
BATF	EIF4EBP1	TRUE	61	factorbook__AP1	3.14	w0.001	AT2
BATF	EIF4G1	TRUE	18	factorbook__AP1	3.14	w0.001	AT2
BATF	EMP1	TRUE	63	factorbook__AP1	3.14	w0.001	AT2
BATF	EMP3	TRUE	84	factorbook__AP1	3.14	w0.001	AT2
BATF	FAM129B	TRUE	75	factorbook__AP1	3.14	w0.001	AT2
BATF	FOSL2	TRUE	68	factorbook__AP1	3.14	w0.001	AT2
BATF	FYN	TRUE	30	factorbook__AP1	3.14	w0.001	AT2
BATF	GADD45B	TRUE	43	factorbook__AP1	3.14	w0.001	AT2
BATF	GEM	TRUE	65	factorbook__AP1	3.14	w0.001	AT2
BATF	GPBP1	TRUE	23	factorbook__AP1	3.14	w0.001	AT2
BATF	H3F3B	TRUE	79	factorbook__AP1	3.14	w0.001	AT2
BATF	HLA-C	TRUE	30	factorbook__AP1	3.14	w0.001	AT2
BATF	HSPA4	TRUE	25	factorbook__AP1	3.14	w0.001	AT2
BATF	IFRD1	TRUE	68	factorbook__AP1	3.14	w0.001	AT2
BATF	IGLL5	TRUE	64	factorbook__AP1	3.14	w0.001	AT2
BATF	IL7R	TRUE	82	factorbook__AP1	3.14	w0.001	AT2
BATF	IQGAP1	TRUE	8	factorbook__AP1	3.14	w0.001	AT2
BATF	IRF1	TRUE	37	factorbook__AP1	3.14	w0.001	AT2
BATF	ISG20	TRUE	55	factorbook__AP1	3.14	w0.001	AT2
BATF	JDP2	TRUE	35	factorbook__AP1	3.14	w0.001	AT2
BATF	JUNB	TRUE	77	factorbook__AP1	3.14	w0.001	AT2
BATF	KDM6B	TRUE	79	factorbook__AP1	3.14	w0.001	AT2
BATF	LMNA	TRUE	79	factorbook__AP1	3.14	w0.001	AT2
BATF	LPP	TRUE	18	factorbook__AP1	3.14	w0.001	AT2
BATF	LSP1	TRUE	62	factorbook__AP1	3.14	w0.001	AT2
BATF	METRNL	TRUE	43	factorbook__AP1	3.14	w0.001	AT2
BATF	MIDN	TRUE	48	factorbook__AP1	3.14	w0.001	AT2
BATF	NCOA7	TRUE	57	factorbook__AP1	3.14	w0.001	AT2
BATF	NME1	TRUE	28	factorbook__AP1	3.14	w0.001	AT2
BATF	NR4A2	TRUE	16	factorbook__AP1	3.14	w0.001	AT2
BATF	PFN1	TRUE	54	factorbook__AP1	3.14	w0.001	AT2
BATF	RASEF	TRUE	28	factorbook__AP1	3.14	w0.001	AT2
BATF	REXO2	TRUE	23	factorbook__AP1	3.14	w0.001	AT2
BATF	RND3	TRUE	21	factorbook__AP1	3.14	w0.001	AT2
BATF	RNF19A	TRUE	49	factorbook__AP1	3.14	w0.001	AT2
BATF	RPL36A	TRUE	19	factorbook__AP1	3.14	w0.001	AT2
BATF	RPL37A	TRUE	29	factorbook__AP1	3.14	w0.001	AT2
BATF	SERTAD1	TRUE	67	factorbook__AP1	3.14	w0.001	AT2
BATF	SLC38A1	TRUE	36	factorbook__AP1	3.14	w0.001	AT2
BATF	SUB1	TRUE	26	factorbook__AP1	3.14	w0.001	AT2
BATF	SURF4	TRUE	63	factorbook__AP1	3.14	w0.001	AT2
BATF	TGIF1	TRUE	41	factorbook__AP1	3.14	w0.001	AT2
BATF	TLE4	TRUE	7	factorbook__AP1	3.14	w0.001	AT2
BATF	TLN1	TRUE	5	factorbook__AP1	3.14	w0.001	AT2
BATF	TM4SF1	TRUE	39	factorbook__AP1	3.14	w0.001	AT2
BATF	TUBA4A	TRUE	31	factorbook__AP1	3.14	w0.001	AT2
BATF	UBC	TRUE	75	factorbook__AP1	3.14	w0.001	AT2
BATF	VIM	TRUE	81	factorbook__AP1	3.14	w0.001	AT2
BATF	ZC3H12A	TRUE	52	factorbook__AP1	3.14	w0.001	AT2
BATF	ZFP36	TRUE	66	factorbook__AP1	3.14	w0.001	AT2
BATF	CREM	TRUE	14	hocomoco__BATF_HUMAN.H11MO.1.A	3.03	w0.001	AT2
BATF	CST7	TRUE	1	hocomoco__BATF_HUMAN.H11MO.1.A	3.03	w0.001	AT2
BATF	FOS	TRUE	2	hocomoco__BATF_HUMAN.H11MO.1.A	3.03	w0.001	AT2
BATF	FOSB	TRUE	44	hocomoco__BATF_HUMAN.H11MO.1.A	3.03	w0.001	AT2
BATF	GADD45G	TRUE	2	hocomoco__BATF_HUMAN.H11MO.1.A	3.03	w0.001	AT2
BATF	GZMB	TRUE	6	hocomoco__BATF_HUMAN.H11MO.1.A	3.03	w0.001	AT2
BATF	IARS	TRUE	4	hocomoco__BATF_HUMAN.H11MO.1.A	3.03	w0.001	AT2
BATF	JUN	TRUE	4	hocomoco__BATF_HUMAN.H11MO.1.A	3.03	w0.001	AT2
BATF	MT2A	TRUE	41	hocomoco__BATF_HUMAN.H11MO.1.A	3.03	w0.001	AT2
BATF	PTP4A1	TRUE	14	hocomoco__BATF_HUMAN.H11MO.1.A	3.03	w0.001	AT2
BATF	RHOQ	TRUE	16	hocomoco__BATF_HUMAN.H11MO.1.A	3.03	w0.001	AT2
BATF	RPL13A	TRUE	1	hocomoco__BATF_HUMAN.H11MO.1.A	3.03	w0.001	AT2
BATF	RPL9	TRUE	6	hocomoco__BATF_HUMAN.H11MO.1.A	3.03	w0.001	AT2
BATF	ZFP36L1	TRUE	2	hocomoco__BATF_HUMAN.H11MO.1.A	3.03	w0.001	AT2
BCL3	BATF	TRUE	59	factorbook__NFKB1	5.72	top1sd	AT2
BCL3	BCL3	TRUE	123	factorbook__NFKB1	5.72	top1sd	AT2
BCL3	BIRC3	TRUE	103	factorbook__NFKB1	5.72	top1sd	AT2
BCL3	CXCL1	TRUE	88	factorbook__NFKB1	5.72	top1sd	AT2
BCL3	IRF1	TRUE	99	factorbook__NFKB1	5.72	top1sd	AT2
BCL3	JDP2	TRUE	64	factorbook__NFKB1	5.72	top1sd	AT2
BCL3	KDM6B	TRUE	90	factorbook__NFKB1	5.72	top1sd	AT2
BCL3	LCN2	TRUE	50	factorbook__NFKB1	5.72	top1sd	AT2
BCL3	REL	TRUE	96	factorbook__NFKB1	5.72	top1sd	AT2
BCL3	RND1	TRUE	66	factorbook__NFKB1	5.72	top1sd	AT2
BCL3	TGIF1	TRUE	67	factorbook__NFKB1	5.72	top1sd	AT2
BCL3	BMP2	TRUE	38	factorbook__NFKB1	4.82	top1sd	AT2
BCL3	CD83	TRUE	34	factorbook__NFKB1	4.82	top1sd	AT2
BCL3	CXCL3	TRUE	48	factorbook__NFKB1	4.82	top1sd	AT2
BCL3	EMP1	TRUE	64	factorbook__NFKB1	4.82	top1sd	AT2
BCL3	ICAM1	TRUE	57	factorbook__NFKB1	4.82	top1sd	AT2
BCL3	IER5	TRUE	60	factorbook__NFKB1	4.82	top1sd	AT2
BCL3	NCOA7	TRUE	48	factorbook__NFKB1	4.82	top1sd	AT2
BCL3	ODC1	TRUE	29	factorbook__NFKB1	4.82	top1sd	AT2
BCL3	SOCS2	TRUE	38	factorbook__NFKB1	4.82	top1sd	AT2
BCL3	ZC3H12A	TRUE	69	factorbook__NFKB1	4.82	top1sd	AT2
BCL3	MYADM	TRUE	7	transfac_pro__M04816	4.22	top50	AT2
BCL3	PMAIP1	TRUE	2	transfac_pro__M04816	4.22	top50	AT2
BCL3	BHLHE40	TRUE	37	transfac_pro__M04816	4.15	top1sd	AT2
BCL3	MED24	TRUE	10	transfac_pro__M04816	4.15	top1sd	AT2
BCL3	MYC	TRUE	6	transfac_pro__M04816	4.15	top1sd	AT2
BCL3	TM4SF1	TRUE	40	transfac_pro__M04816	4.15	top1sd	AT2
BCL3	GADD45G	TRUE	3	dbcorrdb__BCL3__ENCSR000BKG_1__m3	3.13	top50	AT2
BCL3	PTP4A1	TRUE	14	dbcorrdb__BCL3__ENCSR000BKG_1__m3	3.13	top50	AT2
CANX	GALNT3	TRUE	1	hdpi__CANX	4.44	top50	AT2
CANX	GOLGA3	TRUE	1	hdpi__CANX	4.44	top50	AT2
CANX	KITLG	TRUE	1	hdpi__CANX	4.44	top50	AT2
CANX	LPP	TRUE	1	hdpi__CANX	4.44	top50	AT2
CANX	LRRC59	TRUE	1	hdpi__CANX	4.44	top50	AT2
CANX	TM9SF3	TRUE	1	hdpi__CANX	4.44	top50	AT2
CREM	AP3D1	TRUE	1	transfac_pro__M00801	3.69	top50perTarget	AT2
CREM	ATP6V0D1	TRUE	7	transfac_pro__M00801	3.69	top50perTarget	AT2
CREM	BAG3	TRUE	9	transfac_pro__M00801	3.69	top50perTarget	AT2
CREM	CCL4	TRUE	26	transfac_pro__M00801	3.69	top50perTarget	AT2
CREM	CREM	TRUE	58	transfac_pro__M00801	3.69	top50perTarget	AT2
CREM	CSRNP1	TRUE	3	transfac_pro__M00801	3.69	top50perTarget	AT2
CREM	DNAJA4	TRUE	16	transfac_pro__M00801	3.69	top50perTarget	AT2
CREM	EGR1	TRUE	22	transfac_pro__M00801	3.69	top50perTarget	AT2
CREM	EIF3A	TRUE	6	transfac_pro__M00801	3.69	top50perTarget	AT2
CREM	EIF5A	TRUE	11	transfac_pro__M00801	3.69	top50perTarget	AT2
CREM	ELL2	TRUE	23	transfac_pro__M00801	3.69	top50perTarget	AT2
CREM	EPB41	TRUE	21	transfac_pro__M00801	3.69	top50perTarget	AT2
CREM	ETF1	TRUE	15	transfac_pro__M00801	3.69	top50perTarget	AT2
CREM	FOS	TRUE	23	transfac_pro__M00801	3.69	top50perTarget	AT2
CREM	FOSB	TRUE	23	transfac_pro__M00801	3.69	top50perTarget	AT2
CREM	GEM	TRUE	23	transfac_pro__M00801	3.69	top50perTarget	AT2
CREM	GK	TRUE	12	transfac_pro__M00801	3.69	top50perTarget	AT2
CREM	GPBP1	TRUE	24	transfac_pro__M00801	3.69	top50perTarget	AT2
CREM	GZMB	TRUE	10	transfac_pro__M00801	3.69	top50perTarget	AT2
CREM	H3F3B	TRUE	4	transfac_pro__M00801	3.69	top50perTarget	AT2
CREM	HMGCR	TRUE	12	transfac_pro__M00801	3.69	top50perTarget	AT2
CREM	ISG20	TRUE	11	transfac_pro__M00801	3.69	top50perTarget	AT2
CREM	JUN	TRUE	18	transfac_pro__M00801	3.69	top50perTarget	AT2
CREM	JUNB	TRUE	11	transfac_pro__M00801	3.69	top50perTarget	AT2
CREM	JUND	TRUE	23	transfac_pro__M00801	3.69	top50perTarget	AT2
CREM	KLF13	TRUE	17	transfac_pro__M00801	3.69	top50perTarget	AT2
CREM	KLF2	TRUE	2	transfac_pro__M00801	3.69	top50perTarget	AT2
CREM	MAFB	TRUE	5	transfac_pro__M00801	3.69	top50perTarget	AT2
CREM	NR4A1	TRUE	9	transfac_pro__M00801	3.69	top50perTarget	AT2
CREM	NR4A2	TRUE	23	transfac_pro__M00801	3.69	top50perTarget	AT2
CREM	RAD23A	TRUE	23	transfac_pro__M00801	3.69	top50perTarget	AT2
CREM	RCAN1	TRUE	20	transfac_pro__M00801	3.69	top50perTarget	AT2
CREM	RGS1	TRUE	14	transfac_pro__M00801	3.69	top50perTarget	AT2
CREM	RNF19A	TRUE	17	transfac_pro__M00801	3.69	top50perTarget	AT2
CREM	RPL21	TRUE	19	transfac_pro__M00801	3.69	top50perTarget	AT2
CREM	RPL34	TRUE	5	transfac_pro__M00801	3.69	top50perTarget	AT2
CREM	RPL41	TRUE	2	transfac_pro__M00801	3.69	top50perTarget	AT2
CREM	RPL9	TRUE	16	transfac_pro__M00801	3.69	top50perTarget	AT2
CREM	RPS29	TRUE	10	transfac_pro__M00801	3.69	top50perTarget	AT2
CREM	RPSA	TRUE	4	transfac_pro__M00801	3.69	top50perTarget	AT2
CREM	SPAG9	TRUE	9	transfac_pro__M00801	3.69	top50perTarget	AT2
CREM	SRGN	TRUE	5	transfac_pro__M00801	3.69	top50perTarget	AT2
CREM	TGIF1	TRUE	14	transfac_pro__M00801	3.69	top50perTarget	AT2
CREM	TM9SF3	TRUE	14	transfac_pro__M00801	3.69	top50perTarget	AT2
CREM	TSC22D3	TRUE	9	transfac_pro__M00801	3.69	top50perTarget	AT2
CREM	VAMP2	TRUE	5	transfac_pro__M00801	3.69	top50perTarget	AT2
CREM	YPEL5	TRUE	4	transfac_pro__M00801	3.69	top50perTarget	AT2
CREM	ARL4C	TRUE	47	taipale_cyt_meth__CREM_NRTGAYGTCAYN_eDBD_meth	3.54	top1sd	AT2
CREM	FYN	TRUE	48	taipale_cyt_meth__CREM_NRTGAYGTCAYN_eDBD_meth	3.54	top1sd	AT2
CREM	LSP1	TRUE	31	taipale_cyt_meth__CREM_NRTGAYGTCAYN_eDBD_meth	3.54	top1sd	AT2
CREM	SPOCK2	TRUE	35	taipale_cyt_meth__CREM_NRTGAYGTCAYN_eDBD_meth	3.54	top1sd	AT2
CREM	AKAP13	TRUE	13	transfac_pro__M00801	3.38	top50perTarget	AT2
CREM	ARHGDIB	TRUE	16	transfac_pro__M00801	3.38	top50perTarget	AT2
CREM	ARID5B	TRUE	19	transfac_pro__M00801	3.38	top50perTarget	AT2
CREM	BMP2	TRUE	4	transfac_pro__M00801	3.38	top50perTarget	AT2
CREM	CD83	TRUE	14	transfac_pro__M00801	3.38	top50perTarget	AT2
CREM	DUSP2	TRUE	20	transfac_pro__M00801	3.38	top50perTarget	AT2
CREM	EMP1	TRUE	15	transfac_pro__M00801	3.38	top50perTarget	AT2
CREM	HLA-C	TRUE	14	transfac_pro__M00801	3.38	top50perTarget	AT2
CREM	ID2	TRUE	3	transfac_pro__M00801	3.38	top50perTarget	AT2
CREM	ITGB1	TRUE	9	transfac_pro__M00801	3.38	top50perTarget	AT2
CREM	KDM6B	TRUE	15	transfac_pro__M00801	3.38	top50perTarget	AT2
CREM	MED24	TRUE	18	transfac_pro__M00801	3.38	top50perTarget	AT2
CREM	METRNL	TRUE	19	transfac_pro__M00801	3.38	top50perTarget	AT2
CREM	MIDN	TRUE	16	transfac_pro__M00801	3.38	top50perTarget	AT2
CREM	MTDH	TRUE	1	transfac_pro__M00801	3.38	top50perTarget	AT2
CREM	ODC1	TRUE	13	transfac_pro__M00801	3.38	top50perTarget	AT2
CREM	PTP4A1	TRUE	18	transfac_pro__M00801	3.38	top50perTarget	AT2
CREM	RPS21	TRUE	4	transfac_pro__M00801	3.38	top50perTarget	AT2
CREM	SF1	TRUE	9	transfac_pro__M00801	3.38	top50perTarget	AT2
CREM	SRRM2	TRUE	6	transfac_pro__M00801	3.38	top50perTarget	AT2
CREM	STK4	TRUE	5	transfac_pro__M00801	3.38	top50perTarget	AT2
CREM	SUB1	TRUE	1	transfac_pro__M00801	3.38	top50perTarget	AT2
CREM	TLN1	TRUE	5	transfac_pro__M00801	3.38	top50perTarget	AT2
CREM	TPM4	TRUE	19	transfac_pro__M00801	3.38	top50perTarget	AT2
CREM	TRA2B	TRUE	13	transfac_pro__M00801	3.38	top50perTarget	AT2
CREM	TUBA4A	TRUE	10	transfac_pro__M00801	3.38	top50perTarget	AT2
CREM	UBC	TRUE	19	transfac_pro__M00801	3.38	top50perTarget	AT2
CREM	ZFP36L1	TRUE	18	transfac_pro__M00801	3.38	top50perTarget	AT2
CREM	ZNF331	TRUE	10	transfac_pro__M00801	3.38	top50perTarget	AT2
ETV5	CCDC141	TRUE	1	cisbp__M6223	3.91	top5perTarget	AT2
ETV5	GPR116	TRUE	5	cisbp__M6223	3.91	top5perTarget	AT2
ETV5	MALL	TRUE	4	cisbp__M6223	3.91	top5perTarget	AT2
ETV5	SFTPC	TRUE	2	cisbp__M6223	3.91	top5perTarget	AT2
ETV5	BMP1	TRUE	1	cisbp__M6223	3.44	top5perTarget	AT2
ETV5	ETV5	TRUE	1	cisbp__M6223	3.44	top5perTarget	AT2
ETV5	FAM184A	TRUE	1	cisbp__M6223	3.44	top5perTarget	AT2
ETV5	AQP1	TRUE	3	taipale_cyt_meth__ETV5_NCAGGAAGGAAGTN_eDBD_meth	3.29	top5perTarget	AT2
ETV5	FMN1	TRUE	3	taipale_cyt_meth__ETV5_NCAGGAAGGAAGTN_eDBD_meth	3.29	top5perTarget	AT2
ETV5	PLA2G1B	TRUE	1	taipale_cyt_meth__ETV5_NCAGGAAGGAAGTN_eDBD_meth	3.29	top5perTarget	AT2
ETV5	SNX30	TRUE	1	taipale_cyt_meth__ETV5_NCAGGAAGGAAGTN_eDBD_meth	3.29	top5perTarget	AT2
FOS	ANXA1	TRUE	88	hocomoco__FOS_HUMAN.H11MO.0.A	4.69	w0.001Andtop50perTarget	AT2
FOS	BAG3	TRUE	91	hocomoco__FOS_HUMAN.H11MO.0.A	4.69	w0.001Andtop50perTarget	AT2
FOS	BCL3	TRUE	51	hocomoco__FOS_HUMAN.H11MO.0.A	4.69	w0.001Andtop50perTarget	AT2
FOS	BHLHE40	TRUE	56	hocomoco__FOS_HUMAN.H11MO.0.A	4.69	w0.001Andtop50perTarget	AT2
FOS	BMP1	TRUE	87	hocomoco__FOS_HUMAN.H11MO.0.A	4.69	w0.001Andtop50perTarget	AT2
FOS	CSRNP1	TRUE	78	hocomoco__FOS_HUMAN.H11MO.0.A	4.69	w0.001Andtop50perTarget	AT2
FOS	EMP1	TRUE	51	hocomoco__FOS_HUMAN.H11MO.0.A	4.69	w0.001Andtop50perTarget	AT2
FOS	EMP3	TRUE	89	hocomoco__FOS_HUMAN.H11MO.0.A	4.69	w0.001Andtop50perTarget	AT2
FOS	EREG	TRUE	76	hocomoco__FOS_HUMAN.H11MO.0.A	4.69	w0.001Andtop50perTarget	AT2
FOS	FAM129B	TRUE	76	hocomoco__FOS_HUMAN.H11MO.0.A	4.69	w0.001Andtop50perTarget	AT2
FOS	FOSB	TRUE	70	hocomoco__FOS_HUMAN.H11MO.0.A	4.69	w0.001Andtop50perTarget	AT2
FOS	GEM	TRUE	75	hocomoco__FOS_HUMAN.H11MO.0.A	4.69	w0.001Andtop50perTarget	AT2
FOS	H3F3B	TRUE	97	hocomoco__FOS_HUMAN.H11MO.0.A	4.69	w0.001Andtop50perTarget	AT2
FOS	IFRD1	TRUE	82	hocomoco__FOS_HUMAN.H11MO.0.A	4.69	w0.001Andtop50perTarget	AT2
FOS	IGLL5	TRUE	52	hocomoco__FOS_HUMAN.H11MO.0.A	4.69	w0.001Andtop50perTarget	AT2
FOS	IL7R	TRUE	77	hocomoco__FOS_HUMAN.H11MO.0.A	4.69	w0.001Andtop50perTarget	AT2
FOS	JUNB	TRUE	106	hocomoco__FOS_HUMAN.H11MO.0.A	4.69	w0.001Andtop50perTarget	AT2
FOS	KDM6B	TRUE	89	hocomoco__FOS_HUMAN.H11MO.0.A	4.69	w0.001Andtop50perTarget	AT2
FOS	KITLG	TRUE	48	hocomoco__FOS_HUMAN.H11MO.0.A	4.69	w0.001Andtop50perTarget	AT2
FOS	LMNA	TRUE	89	hocomoco__FOS_HUMAN.H11MO.0.A	4.69	w0.001Andtop50perTarget	AT2
FOS	PLS3	TRUE	53	hocomoco__FOS_HUMAN.H11MO.0.A	4.69	w0.001Andtop50perTarget	AT2
FOS	SERTAD1	TRUE	75	hocomoco__FOS_HUMAN.H11MO.0.A	4.69	w0.001Andtop50perTarget	AT2
FOS	UBC	TRUE	85	hocomoco__FOS_HUMAN.H11MO.0.A	4.69	w0.001Andtop50perTarget	AT2
FOS	VIM	TRUE	84	hocomoco__FOS_HUMAN.H11MO.0.A	4.69	w0.001Andtop50perTarget	AT2
FOS	ZFP36	TRUE	77	hocomoco__FOS_HUMAN.H11MO.0.A	4.69	w0.001Andtop50perTarget	AT2
FOS	BMP2	TRUE	13	swissregulon__hs__FOS_FOS_B_L1__JUN_B_D_.p2	4.24	w0.001Andtop50perTarget	AT2
FOS	EZR	TRUE	8	swissregulon__hs__FOS_FOS_B_L1__JUN_B_D_.p2	4.24	w0.001Andtop50perTarget	AT2
FOS	FAM184A	TRUE	62	swissregulon__hs__FOS_FOS_B_L1__JUN_B_D_.p2	4.24	w0.001Andtop50perTarget	AT2
FOS	FYN	TRUE	17	swissregulon__hs__FOS_FOS_B_L1__JUN_B_D_.p2	4.24	w0.001Andtop50perTarget	AT2
FOS	GADD45B	TRUE	26	swissregulon__hs__FOS_FOS_B_L1__JUN_B_D_.p2	4.24	w0.001Andtop50perTarget	AT2
FOS	HMGCS1	TRUE	29	swissregulon__hs__FOS_FOS_B_L1__JUN_B_D_.p2	4.24	w0.001Andtop50perTarget	AT2
FOS	KRT8	TRUE	33	swissregulon__hs__FOS_FOS_B_L1__JUN_B_D_.p2	4.24	w0.001Andtop50perTarget	AT2
FOS	LSP1	TRUE	41	swissregulon__hs__FOS_FOS_B_L1__JUN_B_D_.p2	4.24	w0.001Andtop50perTarget	AT2
FOS	MARCKSL1	TRUE	2	swissregulon__hs__FOS_FOS_B_L1__JUN_B_D_.p2	4.24	w0.001Andtop50perTarget	AT2
FOS	MIDN	TRUE	32	swissregulon__hs__FOS_FOS_B_L1__JUN_B_D_.p2	4.24	w0.001Andtop50perTarget	AT2
FOS	MT2A	TRUE	24	swissregulon__hs__FOS_FOS_B_L1__JUN_B_D_.p2	4.24	w0.001Andtop50perTarget	AT2
FOS	PTTG1IP	TRUE	19	swissregulon__hs__FOS_FOS_B_L1__JUN_B_D_.p2	4.24	w0.001Andtop50perTarget	AT2
FOS	SLC38A1	TRUE	16	swissregulon__hs__FOS_FOS_B_L1__JUN_B_D_.p2	4.24	w0.001Andtop50perTarget	AT2
[truncated: 40,116 more rows]
